# Supplementary material for: Establishment of an in vitro model of cultured viable human, porcine and canine skin and comparison of different media supplements
Source: PeerJ journal article supplement (doi:10.7717/peerj.7811), 2019-10-03
Supplement: Evaluation_skin_cultivation_with_lin.high_and_lin.low.pdf [file Evaluation_skin_cultivation_with_lin.high_and_lin.low.pdf]

IsBa\_180815\_Evaluation\_skin\_cult\_humanT0-3.pdf  
IsBa\_180815\_Evaluation\_skin\_cult\_humanT4-7.pdf  
IsBa\_180815\_Evaluation\_skin\_cult\_humanT8-11.pdf  
IsBa\_180815\_Evaluation\_skin\_cult\_humanT12-14.pdf  
IsBa\_180815\_Evaluation\_skin\_cult\_porcineT0-3.pdf  
IsBa\_180815\_Evaluation\_skin\_cult\_porcineT4-7.pdf  
IsBa\_180815\_Evaluation\_skin\_cult\_porcineT8-11.pdf  
IsBa\_180815\_Evaluation\_skin\_cult\_porcineT12-14.pdf  
IsBa\_180815\_Evaluation\_skin\_cult\_canineT0-7.pdf  
IsBa\_180815\_Evaluation\_skin\_cult\_canineT8-14.pdf  
IsBa\_180820\_Evaluation\_+-controls\_all\_skins.pdf

|                    |              |                              |                         |                           |                     |
|--------------------|--------------|------------------------------|-------------------------|---------------------------|---------------------|
| Project number     | F-120        | Apparatus                    | Wallac Victor           | Operator                  | IsBa                |
| GLP Study (Number) | n.a.         | Protocol (instrument method) | LDH test 2016           | Date of preparation       | 19-04-18            |
| hot                | isotope      | n.a.                         | File name (results)     | IsBa_190419/20_LDH_full_v | Date of measurement |
|                    | name         | n.a.                         | Kind of well plate      | 96 well                   | 19-04-18            |
| substance          | ACB-ID       | n.a.                         | sample volume [µL]      | 100                       | shaking time [min]  |
|                    | Batch number | n.a.                         | Cocktail volume [µL]    | 175                       | 150                 |
| cold               | name         | LDH                          | ACB-ID of cocktail      |                           | Kind of measurement |
|                    | ACB-ID       | L23982R                      | Matrix                  | DMEM (from powder)+PEG    | UV-vis              |
| substance          | Batch number | SLBK6345V                    | Blank description       | DMEM/PEG, H2O             | Wave length [nm]    |
|                    | n.a.         | n.a.                         | Pipettes (No. / volume) | 50-200µl                  | 450                 |
| n.a.               | n.a.         | n.a.                         | Pipettes (No. / volume) | n.a.                      | Remarks             |
| n.a.               | n.a.         | n.a.                         | Pipettes (No. / volume) | n.a.                      | Remarks             |
| n.a.               | n.a.         | n.a.                         | Pipettes (No. / volume) | n.a.                      | Remarks             |

Messdaten (diese Tabelle in Bericht übernehmen)

| Sample name * | concentration (theor.) * | measured data | measured data | measured data | mean measured | SD    | RSD  | Blank * | measured data after *<br>Blank subtraction | concentration (calc.) * | Deviation * | Residuen |
|---------------|--------------------------|---------------|---------------|---------------|---------------|-------|------|---------|--------------------------------------------|-------------------------|-------------|----------|
|               | [µg/mL]                  | [AU]          | [AU]          | [AU]          | [AU]          | [AU]  | [%]  | [AU]    |                                            | [µg/mL]                 | [%]         |          |
| KLP1          |                          |               |               |               |               |       |      | 0.047   |                                            |                         |             |          |
| KLP2          |                          |               |               |               |               |       |      | 0.054   |                                            |                         |             |          |
| KLP3          |                          |               |               |               |               |       |      | 0.051   |                                            |                         |             |          |
| KLP4          | 0.041                    | 0.959         | 0.972         | 0.883         | 0.938         | 0.04  | 4.19 | 0.051   | 0.887                                      | 0.041                   | -0.57       | 0.00     |
| KLP5          | 0.018                    | 0.483         | 0.484         | 0.474         | 0.480         | 0.00  | 0.98 | 0.052   | 0.429                                      | 0.019                   | 2.42        | 0.00     |
| KLP6          | 0.012                    | 0.360         | 0.359         | 0.326         | 0.348         | 0.02  | 4.54 | 0.051   | 0.297                                      | 0.013                   | 5.00        | 0.00     |
| KLP7          | 0.007                    | 0.228         | 0.228         | 0.199         | 0.218         | 0.014 | 6.35 |         | 0.168                                      | 0.006                   | -11.29      | 0.00     |
| KLP8          |                          |               |               |               |               |       |      |         |                                            |                         |             |          |

Statistical data

|                                               |                                          |            |              |
|-----------------------------------------------|------------------------------------------|------------|--------------|
| Geradensteigung                               | Slope                                    | m          | 21.03        |
| Y-Achsenabschnitt                             | Y-intercept                              | b          | 0.03         |
| Standardabw. Geradensteigung                  | SD-Slope                                 | $s_m$      | 0.648055501  |
| Standardabw. Achsenabschnittes                | SD-Y-intercept                           | $s_b$      | 0.015177452  |
| Anzahl Messpunkte                             | number of measuring points               | n          | 4            |
| Quadratsumme                                  | sum of squares                           | Qxx        | 0.000664048  |
| Bereichsmittel                                |                                          |            | 0.019557193  |
| Freiheitsgrade                                | degree of freedom                        | f          | 2            |
| Student-t-Faktor für (P = 95 %; f = n-2)      | Student-t-factor for (P = 95 %; f = n-2) | t          | 4.303        |
| Vertrauensbereich Steig. (95 %) Obergrenze    |                                          | $m + VB_m$ | 23.81763508  |
| Vertrauensbereich Steig. (95 %) Untergrenze   |                                          | $m - VB_m$ | 18.24048944  |
| Vertrauensbereich Achsenabschnitt (95 %) O.g. |                                          | $b + VB_b$ | 0.099335820  |
| Vertrauensbereich Achsenabschnitt (95 %) U.g. |                                          | $b - VB_b$ | -0.031281327 |
| Korrelationskoeffizient                       | correlation coefficient                  | r          | 0.9991       |
| Bestimmtheitsmaß                              | determination coefficient                | $r^2$      | 0.9981       |
| Reststandardabweichung                        |                                          | $s_0$      | 0.01669983   |
| Summe Restquadrate                            |                                          | sd         | 0.657389838  |
| Verfahrensstandardabw.                        |                                          | $s_{ab}$   | 0.000794131  |
| Rel. Verfahrensstandardabw. %                 |                                          | $V_{ab}$   | 4.060559029  |

Berichten

|                    |        |
|--------------------|--------|
| mean Blank         | 0      |
| SD Blank           | 0.00   |
| RSD Blank          | 3.79 % |
| $\chi^2$ SD (LLOQ) | 0.01   |
| $\chi^2$ SD (AU)   | 0.01   |
| LLOQ (AU)          | 0.061  |
| LLOQ (AU)          | 0.067  |
| ULOQ               | 0.887  |
| LLOQ (Lin)         | 0.168  |

Evaluation / Comment

LDH linearity valid with 7 standards, split in lin high and lin low, each with 4 standards and KLP4 common standard for both.  $R^2$  0.9981, deviations for both between -13.34% and +13.04%

Date

Operator

Date

Control

|               |  |         |               |
|---------------|--|---------|---------------|
| Formblatt-Nr. |  | Version |               |
| Titel         |  |         |               |
| Gültig ab     |  | Ablage  | Projektordner |

Figure 1 Linearity

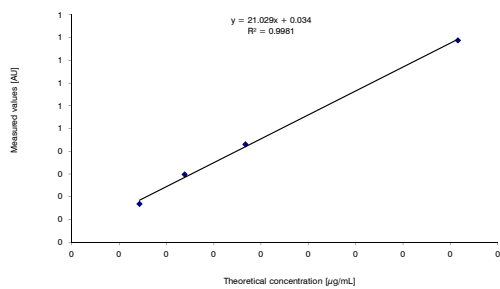

Figure 2 Method validation Residuen Plot

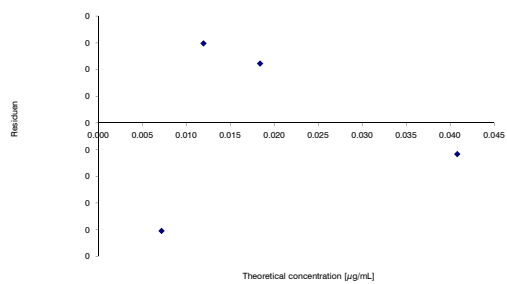

Evaluation / Comment

lin passed

Date \_\_\_\_\_ Operator \_\_\_\_\_ Date \_\_\_\_\_ Control \_\_\_\_\_

| Sample name | Plate | Position | [AU]  | [AU]-Blank | Rating       | [µg/mL] | Dilution factor | [µg/mL] |
|-------------|-------|----------|-------|------------|--------------|---------|-----------------|---------|
| 0           | TO    | A01      | 0     | 0          | kleiner LLOQ | #VALUE! | 1               | #VALUE! |
| 0           | TO    | A02      | 0     | 0          | kleiner LLOQ | #VALUE! | 1               | #VALUE! |
| 0           | TO    | A03      | 0     | 0          | kleiner LLOQ | #VALUE! | 1               | #VALUE! |
| 0           | TO    | A04      | 0     | 0          | kleiner LLOQ | #VALUE! | 1               | #VALUE! |
| TOHN1       | TO    | A05      | 0     | 0          | kleiner LLOQ | #VALUE! | 1               | #VALUE! |
| TOHN1       | TO    | A06      | 0     | 0          | kleiner LLOQ | #VALUE! | 1               | #VALUE! |
| TOHN2       | TO    | A07      | 0     | 0          | kleiner LLOQ | #VALUE! | 1               | #VALUE! |
| TOHN2       | TO    | A08      | 0.702 | 0.651      | 0.651        | 0.029   | 176             | 5.164   |
| TOHN3       | TO    | A09      | 0     | 0          | kleiner LLOQ | #VALUE! | 1               | #VALUE! |
| TOHN3       | TO    | A10      | 0     | 0          | kleiner LLOQ | #VALUE! | 1               | #VALUE! |
| TOHN4       | TO    | A11      | 0.475 | 0.424      | 0.424        | 0.019   | 2.75            | 0.051   |
| TOHN4       | TO    | A12      | 0.393 | 0.342      | 0.342        | 0.015   | 2.75            | 0.040   |
| 0           | TO    | B01      | 0     | 0          | kleiner LLOQ | #VALUE! | 1               | #VALUE! |
| 0           | TO    | B02      | 0     | 0          | kleiner LLOQ | #VALUE! | 1               | #VALUE! |
| 0           | TO    | B03      | 0     | 0          | kleiner LLOQ | #VALUE! | 1               | #VALUE! |
| 0           | TO    | B04      | 0     | 0          | kleiner LLOQ | #VALUE! | 1               | #VALUE! |
| TOHS11      | TO    | B05      | 0.879 | 0.828      | 0.828        | 0.038   | 22              | 0.831   |
| TOHS11      | TO    | B06      | 0     | 0          | kleiner LLOQ | #VALUE! | 1               | #VALUE! |
| TOHS12      | TO    | B07      | 0     | 0          | kleiner LLOQ | #VALUE! | 1               | #VALUE! |
| TOHS12      | TO    | B08      | 0     | 0          | kleiner LLOQ | #VALUE! | 1               | #VALUE! |
| TOHS13      | TO    | B09      | 0.811 | 0.760      | 0.760        | 0.035   | 176             | 6.076   |
| TOHS13      | TO    | B10      | 0.727 | 0.676      | 0.676        | 0.031   | 176             | 5.373   |
| TOHS14      | TO    | B11      | 0.349 | 0.298      | 0.298        | 0.013   | 2.75            | 0.035   |
| TOHS14      | TO    | B12      | 0.252 | 0.201      | 0.201        | 0.008   | 2.75            | 0.022   |
| 0           | TO    | C01      | 0     | 0          | kleiner LLOQ | #VALUE! | 1               | #VALUE! |
| 0           | TO    | C02      | 0     | 0          | kleiner LLOQ | #VALUE! | 1               | #VALUE! |
| 0           | TO    | C03      | 0     | 0          | kleiner LLOQ | #VALUE! | 1               | #VALUE! |
| 0           | TO    | C04      | 0     | 0          | kleiner LLOQ | #VALUE! | 1               | #VALUE! |
| TOHS21      | TO    | C05      | 0     | 0          | kleiner LLOQ | #VALUE! | 1               | #VALUE! |
| TOHS21      | TO    | C06      | 0     | 0          | kleiner LLOQ | #VALUE! | 1               | #VALUE! |
| TOHS22      | TO    | C07      | 0     | 0          | kleiner LLOQ | #VALUE! | 1               | #VALUE! |
| TOHS22      | TO    | C08      | 0     | 0          | kleiner LLOQ | #VALUE! | 1               | #VALUE! |
| TOHS23      | TO    | C09      | 0     | 0          | kleiner LLOQ | #VALUE! | 1               | #VALUE! |
| TOHS23      | TO    | C10      | 0     | 0          | kleiner LLOQ | #VALUE! | 1               | #VALUE! |
| TOHS24      | TO    | C11      | 0.283 | 0.232      | 0.232        | 0.009   | 2.75            | 0.026   |
| TOHS24      | TO    | C12      | 0     | 0          | kleiner LLOQ | #VALUE! | 1               | #VALUE! |
| 0           | TO    | D01      | 0     | 0          | kleiner LLOQ | #VALUE! | 1               | #VALUE! |
| 0           | TO    | D02      | 0     | 0          | kleiner LLOQ | #VALUE! | 1               | #VALUE! |
| 0           | TO    | D03      | 0     | 0          | kleiner LLOQ | #VALUE! | 1               | #VALUE! |
| 0           | TO    | D04      | 0     | 0          | kleiner LLOQ | #VALUE! | 1               | #VALUE! |
| 0           | TO    | D05      | 0     | 0          | kleiner LLOQ | #VALUE! | 1               | #VALUE! |
| 0           | TO    | D06      | 0     | 0          | kleiner LLOQ | #VALUE! | 1               | #VALUE! |
| 0           | TO    | D07      | 0     | 0          | kleiner LLOQ | #VALUE! | 1               | #VALUE! |
| 0           | TO    | D08      | 0     | 0          | kleiner LLOQ | #VALUE! | 1               | #VALUE! |
| 0           | TO    | D09      | 0     | 0          | kleiner LLOQ | #VALUE! | 1               | #VALUE! |
| 0           | TO    | D10      | 0     | 0          | kleiner LLOQ | #VALUE! | 1               | #VALUE! |
| 0           | TO    | D11      | 0     | 0          | kleiner LLOQ | #VALUE! | 1               | #VALUE! |
| 0           | TO    | D12      | 0     | 0          | kleiner LLOQ | #VALUE! | 1               | #VALUE! |

Plate: TO

| Test | Test | Test | Test | Test  | Test | Test | Test  | Test  | Test  | Test  | Test  | Test |
|------|------|------|------|-------|------|------|-------|-------|-------|-------|-------|------|
| 1    | 2    | 3    | 4    | 5     | 6    | 7    | 8     | 9     | 10    | 11    | 12    |      |
| A    |      |      |      |       |      |      | 0.702 |       |       | 0.475 | 0.393 |      |
| B    |      |      |      | 0.879 |      |      |       | 0.811 | 0.727 | 0.349 | 0.252 |      |
| C    |      |      |      |       |      |      |       |       |       | 0.283 | 0.211 |      |
| D    |      |      |      |       |      |      |       |       |       |       |       |      |
| E    |      |      |      |       |      |      |       |       |       |       |       |      |
| F    |      |      |      |       |      |      |       |       |       |       |       |      |
| G    |      |      |      |       |      |      | 0.061 | 0.065 | 0.056 | 0.055 | 0.057 |      |
| H    |      |      |      |       |      |      | 0.051 | 0.05  | 0.051 | 0.05  | 0.049 |      |

| Plattenbelegung | 1 | 2 | 3 | 4 | 5      | 6      | 7            | 8            | 9            | 10           | 11           | 12           |
|-----------------|---|---|---|---|--------|--------|--------------|--------------|--------------|--------------|--------------|--------------|
| A               |   |   |   |   | TOHN1  | TOHN1  | TOHN2        | TOHN2        | TOHN3        | TOHN3        | TOHN4        | TOHN4        |
| B               |   |   |   |   | TOHS11 | TOHS11 | TOHS12       | TOHS12       | TOHS13       | TOHS13       | TOHS14       | TOHS14       |
| C               |   |   |   |   | TOHS21 | TOHS21 | TOHS22       | TOHS22       | TOHS23       | TOHS23       | TOHS24       | TOHS24       |
| D               |   |   |   |   |        |        |              |              |              |              |              |              |
| E               |   |   |   |   |        |        |              |              |              |              |              |              |
| F               |   |   |   |   |        |        |              |              |              |              |              |              |
| G               |   |   |   |   |        |        | Blank PEG    | Blank PEG    | Blank PEG    | Blank PEG    | Blank PEG    | Blank PEG    |
| H               |   |   |   |   |        |        | Blank no PEG | Blank no PEG | Blank no PEG | Blank no PEG | Blank no PEG | Blank no PEG |

Samples aufgeteilt in lin high und low:höher konzentrierte Samples bei lin high zu finden.

Comment:  
 Erste 4 Reihen immer Testmessung zur Evaluierung der benötigten Verdünnung. Wird nicht mit ausgewertet. Unverdünte Messungen außerhalb der Linearität werden ebenfalls nicht ausgewertet. Dil.Faktor unverdünnte samples=2,75 (100µl sample+100µlIRM+75µl stop sol.) Verdünnung (gelb) Dil.8\*Dil8\*Dil2,75=Dil.176

Date Operator

Date Control

|              |    |     |   |              |         |      |         |
|--------------|----|-----|---|--------------|---------|------|---------|
| 0            | TO | E01 | 0 | kleiner LLOQ | #VALUE! | 1    | #VALUE! |
| 0            | TO | E02 | 0 | kleiner LLOQ | #VALUE! | 1    | #VALUE! |
| 0            | TO | E03 | 0 | kleiner LLOQ | #VALUE! | 1    | #VALUE! |
| 0            | TO | E04 | 0 | kleiner LLOQ | #VALUE! | 1    | #VALUE! |
| 0            | TO | E05 | 0 | kleiner LLOQ | #VALUE! | 1    | #VALUE! |
| 0            | TO | E06 | 0 | kleiner LLOQ | #VALUE! | 1    | #VALUE! |
| 0            | TO | E07 | 0 | kleiner LLOQ | #VALUE! | 1    | #VALUE! |
| 0            | TO | E08 | 0 | kleiner LLOQ | #VALUE! | 1    | #VALUE! |
| 0            | TO | E09 | 0 | kleiner LLOQ | #VALUE! | 1    | #VALUE! |
| 0            | TO | E10 | 0 | kleiner LLOQ | #VALUE! | 1    | #VALUE! |
| 0            | TO | E11 | 0 | kleiner LLOQ | #VALUE! | 1    | #VALUE! |
| 0            | TO | E12 | 0 | kleiner LLOQ | #VALUE! | 1    | #VALUE! |
| 0            | TO | F01 | 0 | kleiner LLOQ | #VALUE! | 1    | #VALUE! |
| 0            | TO | F02 | 0 | kleiner LLOQ | #VALUE! | 1    | #VALUE! |
| 0            | TO | F03 | 0 | kleiner LLOQ | #VALUE! | 1    | #VALUE! |
| 0            | TO | F04 | 0 | kleiner LLOQ | #VALUE! | 1    | #VALUE! |
| 0            | TO | F05 | 0 | kleiner LLOQ | #VALUE! | 1    | #VALUE! |
| 0            | TO | F06 | 0 | kleiner LLOQ | #VALUE! | 1    | #VALUE! |
| 0            | TO | F07 | 0 | kleiner LLOQ | #VALUE! | 1    | #VALUE! |
| 0            | TO | F08 | 0 | kleiner LLOQ | #VALUE! | 1    | #VALUE! |
| 0            | TO | F09 | 0 | kleiner LLOQ | #VALUE! | 1    | #VALUE! |
| 0            | TO | F10 | 0 | kleiner LLOQ | #VALUE! | 1    | #VALUE! |
| 0            | TO | F11 | 0 | kleiner LLOQ | #VALUE! | 1    | #VALUE! |
| 0            | TO | F12 | 0 | kleiner LLOQ | #VALUE! | 1    | #VALUE! |
| 0            | TO | G01 | 0 | kleiner LLOQ | #VALUE! | 1    | #VALUE! |
| 0            | TO | G02 | 0 | kleiner LLOQ | #VALUE! | 1    | #VALUE! |
| 0            | TO | G03 | 0 | kleiner LLOQ | #VALUE! | 1    | #VALUE! |
| 0            | TO | G04 | 0 | kleiner LLOQ | #VALUE! | 1    | #VALUE! |
| 0            | TO | G05 | 0 | kleiner LLOQ | #VALUE! | 1    | #VALUE! |
| 0            | TO | G06 | 0 | kleiner LLOQ | #VALUE! | 1    | #VALUE! |
| Blank PEG    | TO | G07 | 0 | kleiner LLOQ | #VALUE! | 2,75 | #VALUE! |
| Blank PEG    | TO | G08 | 0 | kleiner LLOQ | #VALUE! | 2,75 | #VALUE! |
| Blank PEG    | TO | G09 | 0 | kleiner LLOQ | #VALUE! | 2,75 | #VALUE! |
| Blank PEG    | TO | G10 | 0 | kleiner LLOQ | #VALUE! | 2,75 | #VALUE! |
| Blank PEG    | TO | G11 | 0 | kleiner LLOQ | #VALUE! | 2,75 | #VALUE! |
| Blank PEG    | TO | G12 | 0 | kleiner LLOQ | #VALUE! | 2,75 | #VALUE! |
| 0            | TO | H01 | 0 | kleiner LLOQ | #VALUE! | 1    | #VALUE! |
| 0            | TO | H02 | 0 | kleiner LLOQ | #VALUE! | 1    | #VALUE! |
| 0            | TO | H03 | 0 | kleiner LLOQ | #VALUE! | 1    | #VALUE! |
| 0            | TO | H04 | 0 | kleiner LLOQ | #VALUE! | 1    | #VALUE! |
| 0            | TO | H05 | 0 | kleiner LLOQ | #VALUE! | 1    | #VALUE! |
| 0            | TO | H06 | 0 | kleiner LLOQ | #VALUE! | 1    | #VALUE! |
| Blank no PEG | TO | H07 | 0 | kleiner LLOQ | #VALUE! | 2,75 | #VALUE! |
| Blank no PEG | TO | H08 | 0 | kleiner LLOQ | #VALUE! | 2,75 | #VALUE! |
| Blank no PEG | TO | H09 | 0 | kleiner LLOQ | #VALUE! | 2,75 | #VALUE! |
| Blank no PEG | TO | H10 | 0 | kleiner LLOQ | #VALUE! | 2,75 | #VALUE! |
| Blank no PEG | TO | H11 | 0 | kleiner LLOQ | #VALUE! | 2,75 | #VALUE! |
| Blank no PEG | TO | H12 | 0 | kleiner LLOQ | #VALUE! | 2,75 | #VALUE! |

|        |    |     |       |       |              |         |       |         |
|--------|----|-----|-------|-------|--------------|---------|-------|---------|
| 0      | T1 | A01 | 0     | 0     | kleiner LLOQ | #VALUE! | 1     | #VALUE! |
| 0      | T1 | A02 | 0     | 0     | kleiner LLOQ | #VALUE! | 1     | #VALUE! |
| 0      | T1 | A03 | 0     | 0     | kleiner LLOQ | #VALUE! | 1     | #VALUE! |
| 0      | T1 | A04 | 0     | 0     | kleiner LLOQ | #VALUE! | 1     | #VALUE! |
| 0      | T1 | A05 | 0     | 0     | kleiner LLOQ | #VALUE! | 1     | #VALUE! |
| 0      | T1 | A06 | 0     | 0     | kleiner LLOQ | #VALUE! | 1     | #VALUE! |
| T1HN2  | T1 | A07 | 0.423 | 0.372 | 0.372        | 0.016   | 13.75 | 0.22    |
| T1HN2  | T1 | A08 | 0.615 | 0.564 | 0.564        | 0.025   | 13.75 | 0.35    |
| T1HN3  | T1 | A09 | 0.670 | 0.619 | 0.619        | 0.028   | 13.75 | 0.38    |
| T1HN3  | T1 | A10 | 0.724 | 0.673 | 0.673        | 0.030   | 13.75 | 0.42    |
| T1HN4  | T1 | A11 | 0.150 | 0.099 | kleiner LLOQ | #VALUE! | 2.75  | #VALUE! |
| T1HN4  | T1 | A12 | 0.153 | 0.102 | kleiner LLOQ | #VALUE! | 2.75  | #VALUE! |
| 0      | T1 | B01 | 0     | 0     | kleiner LLOQ | #VALUE! | 1     | #VALUE! |
| 0      | T1 | B02 | 0     | 0     | kleiner LLOQ | #VALUE! | 1     | #VALUE! |
| 0      | T1 | B03 | 0     | 0     | kleiner LLOQ | #VALUE! | 1     | #VALUE! |
| 0      | T1 | B04 | 0     | 0     | kleiner LLOQ | #VALUE! | 1     | #VALUE! |
| 0      | T1 | B05 | 0     | 0     | kleiner LLOQ | #VALUE! | 1     | #VALUE! |
| 0      | T1 | B06 | 0     | 0     | kleiner LLOQ | #VALUE! | 1     | #VALUE! |
| 0      | T1 | B07 | 0     | 0     | kleiner LLOQ | #VALUE! | 1     | #VALUE! |
| 0      | T1 | B08 | 0     | 0     | kleiner LLOQ | #VALUE! | 1     | #VALUE! |
| 0      | T1 | B09 | 0     | 0     | kleiner LLOQ | #VALUE! | 1     | #VALUE! |
| 0      | T1 | B10 | 0     | 0     | kleiner LLOQ | #VALUE! | 1     | #VALUE! |
| T1HS14 | T1 | B11 | 0.147 | 0.096 | kleiner LLOQ | #VALUE! | 2.75  | #VALUE! |
| T1HS14 | T1 | B12 | 0.138 | 0.087 | kleiner LLOQ | #VALUE! | 2.75  | #VALUE! |
| 0      | T1 | C01 | 0     | 0     | kleiner LLOQ | #VALUE! | 1     | #VALUE! |
| 0      | T1 | C02 | 0     | 0     | kleiner LLOQ | #VALUE! | 1     | #VALUE! |
| 0      | T1 | C03 | 0     | 0     | kleiner LLOQ | #VALUE! | 1     | #VALUE! |
| 0      | T1 | C04 | 0     | 0     | kleiner LLOQ | #VALUE! | 1     | #VALUE! |
| 0      | T1 | C05 | 0     | 0     | kleiner LLOQ | #VALUE! | 1     | #VALUE! |
| 0      | T1 | C06 | 0     | 0     | kleiner LLOQ | #VALUE! | 1     | #VALUE! |
| 0      | T1 | C07 | 0     | 0     | kleiner LLOQ | #VALUE! | 1     | #VALUE! |
| 0      | T1 | C08 | 0     | 0     | kleiner LLOQ | #VALUE! | 1     | #VALUE! |
| 0      | T1 | C09 | 0     | 0     | kleiner LLOQ | #VALUE! | 1     | #VALUE! |
| 0      | T1 | C10 | 0     | 0     | kleiner LLOQ | #VALUE! | 1     | #VALUE! |
| T1HS24 | T1 | C11 | 0.092 | 0.041 | kleiner LLOQ | #VALUE! | 2.75  | #VALUE! |
| T1HS24 | T1 | C12 | 0.112 | 0.061 | kleiner LLOQ | #VALUE! | 2.75  | #VALUE! |
| 0      | T1 | D01 | 0     | 0     | kleiner LLOQ | #VALUE! | 1     | #VALUE! |
| 0      | T1 | D02 | 0     | 0     | kleiner LLOQ | #VALUE! | 1     | #VALUE! |
| 0      | T1 | D03 | 0     | 0     | kleiner LLOQ | #VALUE! | 1     | #VALUE! |
| 0      | T1 | D04 | 0     | 0     | kleiner LLOQ | #VALUE! | 1     | #VALUE! |
| 0      | T1 | D05 | 0     | 0     | kleiner LLOQ | #VALUE! | 1     | #VALUE! |
| 0      | T1 | D06 | 0     | 0     | kleiner LLOQ | #VALUE! | 1     | #VALUE! |
| 0      | T1 | D07 | 0     | 0     | kleiner LLOQ | #VALUE! | 1     | #VALUE! |
| 0      | T1 | D08 | 0     | 0     | kleiner LLOQ | #VALUE! | 1     | #VALUE! |
| 0      | T1 | D09 | 0     | 0     | kleiner LLOQ | #VALUE! | 1     | #VALUE! |
| 0      | T1 | D10 | 0     | 0     | kleiner LLOQ | #VALUE! | 1     | #VALUE! |
| 0      | T1 | D11 | 0     | 0     | kleiner LLOQ | #VALUE! | 1     | #VALUE! |
| 0      | T1 | D12 | 0     | 0     | kleiner LLOQ | #VALUE! | 1     | #VALUE! |

Plate: T1

|   | 1 | 2 | 3 | 4     | 5 | 6 | 7     | 8     | 9     | 10    | 11    | 12    |
|---|---|---|---|-------|---|---|-------|-------|-------|-------|-------|-------|
| A |   |   |   |       |   |   | 0.423 | 0.615 | 0.670 | 0.724 | 0.150 | 0.153 |
| B |   |   |   |       |   |   |       |       |       |       | 0.147 | 0.138 |
| C |   |   |   |       |   |   |       |       |       |       | 0.092 | 0.112 |
| D |   |   |   |       |   |   |       |       |       |       |       |       |
| E |   |   |   |       |   |   |       |       |       |       |       |       |
| F |   |   |   |       |   |   |       |       |       |       |       |       |
| G |   |   |   | 0.911 |   |   | 0.064 | 0.054 | 0.052 | 0.056 | 0.051 | 0.055 |
| H |   |   |   |       |   |   | 0.051 | 0.051 | 0.051 | 0.052 | 0.052 | 0.052 |

gelb dil5\*dil2,75=dil 13,75

Plattenbelegung

|   | 1 | 2 | 3 | 4        | 5 | 6 | 7            | 8            | 9            | 10           | 11           | 12           |
|---|---|---|---|----------|---|---|--------------|--------------|--------------|--------------|--------------|--------------|
| A |   |   |   |          |   |   | T1HN2        | T1HN2        | T1HN3        | T1HN3        | T1HN4        | T1HN4        |
| B |   |   |   |          |   |   |              |              |              |              | T1HS14       | T1HS14       |
| C |   |   |   |          |   |   |              |              |              |              | T1HS24       | T1HS24       |
| D |   |   |   |          |   |   |              |              |              |              |              |              |
| E |   |   |   |          |   |   |              |              |              |              |              |              |
| F |   |   |   |          |   |   |              |              |              |              |              |              |
| G |   |   |   | T1HS11WH |   |   | Blank PEG    | Blank PEG    | Blank PEG    | Blank PEG    | Blank PEG    | Blank PEG    |
| H |   |   |   |          |   |   | Blank no Peg | Blank no Peg | Blank no Peg | Blank no Peg | Blank no Peg | Blank no Peg |

Comment:

Erste 4 Reihen immer Testmessung zur Evaluierung der benötigten Verdünnung. Wird nicht mit ausgewertet. Unverdünnte Messungen außerhalb der Linearität werden ebenfalls nicht ausgewertet. Dil.Faktor unverdünnte samples=2,75 (100µl sample+100µlRM+75µl stop sol.) Verdünnung (gelb) Dil.5\*dil2,75=dil 13,5; rot dil 9\*dil9\*dil2,75=dil81

Date Operator \_\_\_\_\_ Date Control \_\_\_\_\_

|              |    |     |       |       |              |         |      |         |
|--------------|----|-----|-------|-------|--------------|---------|------|---------|
| 0            | T1 | E01 | 0     | 0     | kleiner LLOQ | #VALUE! | 1    | #VALUE! |
| 0            | T1 | E02 | 0     | 0     | kleiner LLOQ | #VALUE! | 1    | #VALUE! |
| 0            | T1 | E03 | 0     | 0     | kleiner LLOQ | #VALUE! | 1    | #VALUE! |
| 0            | T1 | E04 | 0     | 0     | kleiner LLOQ | #VALUE! | 1    | #VALUE! |
| 0            | T1 | E05 | 0     | 0     | kleiner LLOQ | #VALUE! | 1    | #VALUE! |
| 0            | T1 | E06 | 0     | 0     | kleiner LLOQ | #VALUE! | 1    | #VALUE! |
| 0            | T1 | E07 | 0     | 0     | kleiner LLOQ | #VALUE! | 1    | #VALUE! |
| 0            | T1 | E08 | 0     | 0     | kleiner LLOQ | #VALUE! | 1    | #VALUE! |
| 0            | T1 | E09 | 0     | 0     | kleiner LLOQ | #VALUE! | 1    | #VALUE! |
| 0            | T1 | E10 | 0     | 0     | kleiner LLOQ | #VALUE! | 1    | #VALUE! |
| 0            | T1 | E11 | 0     | 0     | kleiner LLOQ | #VALUE! | 1    | #VALUE! |
| 0            | T1 | E12 | 0     | 0     | kleiner LLOQ | #VALUE! | 1    | #VALUE! |
| 0            | T1 | F01 | 0     | 0     | kleiner LLOQ | #VALUE! | 1    | #VALUE! |
| 0            | T1 | F02 | 0     | 0     | kleiner LLOQ | #VALUE! | 1    | #VALUE! |
| 0            | T1 | F03 | 0     | 0     | kleiner LLOQ | #VALUE! | 1    | #VALUE! |
| 0            | T1 | F04 | 0     | 0     | kleiner LLOQ | #VALUE! | 1    | #VALUE! |
| 0            | T1 | F05 | 0     | 0     | kleiner LLOQ | #VALUE! | 1    | #VALUE! |
| 0            | T1 | F06 | 0     | 0     | kleiner LLOQ | #VALUE! | 1    | #VALUE! |
| 0            | T1 | F07 | 0     | 0     | kleiner LLOQ | #VALUE! | 1    | #VALUE! |
| 0            | T1 | F08 | 0     | 0     | kleiner LLOQ | #VALUE! | 1    | #VALUE! |
| 0            | T1 | F09 | 0     | 0     | kleiner LLOQ | #VALUE! | 1    | #VALUE! |
| 0            | T1 | F10 | 0     | 0     | kleiner LLOQ | #VALUE! | 1    | #VALUE! |
| 0            | T1 | F11 | 0     | 0     | kleiner LLOQ | #VALUE! | 1    | #VALUE! |
| 0            | T1 | F12 | 0     | 0     | kleiner LLOQ | #VALUE! | 1    | #VALUE! |
| 0            | T1 | G01 | 0     | 0     | kleiner LLOQ | #VALUE! | 1    | #VALUE! |
| 0            | T1 | G02 | 0     | 0     | kleiner LLOQ | #VALUE! | 1    | #VALUE! |
| 0            | T1 | G03 | 0     | 0     | kleiner LLOQ | #VALUE! | 1    | #VALUE! |
| T1HS11WH     | T1 | G04 | 0.911 | 0.860 | 0.860        | 0.039   | 81   | 3.181   |
| 0            | T1 | G05 | 0     | 0     | kleiner LLOQ | #VALUE! | 1    | #VALUE! |
| 0            | T1 | G06 | 0     | 0     | kleiner LLOQ | #VALUE! | 1    | #VALUE! |
| Blank PEG    | T1 | G07 | 0     | 0     | kleiner LLOQ | #VALUE! | 2.75 | #VALUE! |
| Blank PEG    | T1 | G08 | 0     | 0     | kleiner LLOQ | #VALUE! | 2.75 | #VALUE! |
| Blank PEG    | T1 | G09 | 0     | 0     | kleiner LLOQ | #VALUE! | 2.75 | #VALUE! |
| Blank PEG    | T1 | G10 | 0     | 0     | kleiner LLOQ | #VALUE! | 2.75 | #VALUE! |
| Blank PEG    | T1 | G11 | 0     | 0     | kleiner LLOQ | #VALUE! | 2.75 | #VALUE! |
| Blank PEG    | T1 | G12 | 0     | 0     | kleiner LLOQ | #VALUE! | 2.75 | #VALUE! |
| 0            | T1 | H01 | 0     | 0     | kleiner LLOQ | #VALUE! | 1    | #VALUE! |
| 0            | T1 | H02 | 0     | 0     | kleiner LLOQ | #VALUE! | 1    | #VALUE! |
| 0            | T1 | H03 | 0     | 0     | kleiner LLOQ | #VALUE! | 1    | #VALUE! |
| 0            | T1 | H04 | 0     | 0     | kleiner LLOQ | #VALUE! | 1    | #VALUE! |
| 0            | T1 | H05 | 0     | 0     | kleiner LLOQ | #VALUE! | 1    | #VALUE! |
| 0            | T1 | H06 | 0     | 0     | kleiner LLOQ | #VALUE! | 1    | #VALUE! |
| Blank no Peg | T1 | H07 | 0     | 0     | kleiner LLOQ | #VALUE! | 2.75 | #VALUE! |
| Blank no Peg | T1 | H08 | 0     | 0     | kleiner LLOQ | #VALUE! | 2.75 | #VALUE! |
| Blank no Peg | T1 | H09 | 0     | 0     | kleiner LLOQ | #VALUE! | 2.75 | #VALUE! |
| Blank no Peg | T1 | H10 | 0     | 0     | kleiner LLOQ | #VALUE! | 2.75 | #VALUE! |
| Blank no Peg | T1 | H11 | 0     | 0     | kleiner LLOQ | #VALUE! | 2.75 | #VALUE! |
| Blank no Peg | T1 | H12 | 0     | 0     | kleiner LLOQ | #VALUE! | 2.75 | #VALUE! |
| 0            | T2 | A01 | 0     | 0     | kleiner LLOQ | #VALUE! | 1    | #VALUE! |
| 0            | T2 | A02 | 0     | 0     | kleiner LLOQ | #VALUE! | 1    | #VALUE! |
| 0            | T2 | A03 | 0     | 0     | kleiner LLOQ | #VALUE! | 1    | #VALUE! |
| 0            | T2 | A04 | 0     | 0     | kleiner LLOQ | #VALUE! | 1    | #VALUE! |
| 0            | T2 | A05 | 0.933 | 0.882 | 0.882        | 0.040   | 22   | 0.887   |
| 0            | T2 | A06 | 0.908 | 0.857 | 0.857        | 0.039   | 22   | 0.861   |
| T2HN2        | T2 | A07 | 0.853 | 0.802 | 0.802        | 0.037   | 22   | 0.804   |
| T2HN2        | T2 | A08 | 0.834 | 0.784 | 0.784        | 0.036   | 22   | 0.784   |
| 0            | T2 | A09 | 0     | 0     | kleiner LLOQ | #VALUE! | 1    | #VALUE! |
| 0            | T2 | A10 | 0     | 0     | kleiner LLOQ | #VALUE! | 1    | #VALUE! |
| T2HN4        | T2 | A11 | 0     | 0     | kleiner LLOQ | #VALUE! | 2.75 | #VALUE! |
| T2HN4        | T2 | A12 | 0     | 0     | kleiner LLOQ | #VALUE! | 2.75 | #VALUE! |
| 0            | T2 | B01 | 0     | 0     | kleiner LLOQ | #VALUE! | 1    | #VALUE! |
| 0            | T2 | B02 | 0     | 0     | kleiner LLOQ | #VALUE! | 1    | #VALUE! |
| 0            | T2 | B03 | 0     | 0     | kleiner LLOQ | #VALUE! | 1    | #VALUE! |
| 0            | T2 | B04 | 0     | 0     | kleiner LLOQ | #VALUE! | 1    | #VALUE! |
| 0            | T2 | B05 | 0     | 0     | kleiner LLOQ | #VALUE! | 1    | #VALUE! |
| 0            | T2 | B06 | 0     | 0     | kleiner LLOQ | #VALUE! | 1    | #VALUE! |
| 0            | T2 | B07 | 0     | 0     | kleiner LLOQ | #VALUE! | 1    | #VALUE! |
| 0            | T2 | B08 | 0     | 0     | kleiner LLOQ | #VALUE! | 1    | #VALUE! |
| 0            | T2 | B09 | 0     | 0     | kleiner LLOQ | #VALUE! | 1    | #VALUE! |
| 0            | T2 | B10 | 0     | 0     | kleiner LLOQ | #VALUE! | 1    | #VALUE! |
| T2HS14       | T2 | B11 | 0     | 0     | kleiner LLOQ | #VALUE! | 2.75 | #VALUE! |
| T2HS14       | T2 | B12 | 0     | 0     | kleiner LLOQ | #VALUE! | 2.75 | #VALUE! |

Plate: T2

|   | 1     | 2     | 3 | 4 | 5     | 6     | 7     | 8     | 9     | 10    | 11    | 12    |
|---|-------|-------|---|---|-------|-------|-------|-------|-------|-------|-------|-------|
| A |       |       |   |   | 0.933 | 0.908 | 0.853 | 0.834 |       |       | 0.140 | 0.136 |
| B |       |       |   |   |       |       |       |       |       |       | 0.141 | 0.139 |
| C |       |       |   |   |       |       | 0.855 | 0.843 | 0.911 | 0.882 | 0.117 | 0.113 |
| D |       |       |   |   |       |       |       |       |       |       |       |       |
| E |       |       |   |   |       |       |       |       |       |       |       |       |
| F |       |       |   |   |       |       |       |       |       |       |       |       |
| G | 0.490 | 0.485 |   |   |       |       | 0.056 | 0.055 | 0.055 | 0.055 | 0.056 | 0.063 |
| H |       |       |   |   |       |       | 0.052 | 0.053 | 0.053 | 0.053 | 0.052 | 0.052 |

Plattenbelegung

|   | 1 | 2 | 3 | 4 | 5 | 6 | 7      | 8      | 9      | 10     | 11     | 12     |
|---|---|---|---|---|---|---|--------|--------|--------|--------|--------|--------|
| A |   |   |   |   |   |   | T2HN2  | T2HN2  |        |        | T2HN4  | T2HN4  |
| B |   |   |   |   |   |   |        |        |        |        | T2HS14 | T2HS14 |
| C |   |   |   |   |   |   | T2HS22 | T2HS22 | T2HS13 | T2HS13 | T2HS24 | T2HS24 |
| D |   |   |   |   |   |   |        |        |        |        |        |        |

|              |    |     |       |       |              |         |      |         |   |        |        |  |  |  |  |              |              |              |              |
|--------------|----|-----|-------|-------|--------------|---------|------|---------|---|--------|--------|--|--|--|--|--------------|--------------|--------------|--------------|
| 0            | T2 | C01 | 0     | 0     | kleiner LLOQ | #VALUE! | 1    | #VALUE! | E |        |        |  |  |  |  |              |              |              |              |
| 0            | T2 | C02 | 0     | 0     | kleiner LLOQ | #VALUE! | 1    | #VALUE! | F |        |        |  |  |  |  |              |              |              |              |
| 0            | T2 | C03 | 0     | 0     | kleiner LLOQ | #VALUE! | 1    | #VALUE! | G | T2HS11 | T2HS11 |  |  |  |  | Blank PEG    | Blank PEG    | Blank PEG    | Blank PEG    |
| 0            | T2 | C04 | 0     | 0     | kleiner LLOQ | #VALUE! | 1    | #VALUE! | H |        |        |  |  |  |  | Blank no PEG | Blank no PEG | Blank no PEG | Blank no PEG |
| 0            | T2 | C05 | 0     | 0     | kleiner LLOQ | #VALUE! | 1    | #VALUE! |   |        |        |  |  |  |  | Blank no PEG | Blank no PEG | Blank no PEG | Blank no PEG |
| 0            | T2 | C06 | 0     | 0     | kleiner LLOQ | #VALUE! | 1    | #VALUE! |   |        |        |  |  |  |  |              |              |              |              |
| T2HS22       | T2 | C07 | 0.855 | 0.804 | 0.804        | 0.037   | 22   | 0.806   |   |        |        |  |  |  |  |              |              |              |              |
| T2HS22       | T2 | C08 | 0.843 | 0.792 | 0.792        | 0.036   | 22   | 0.793   |   |        |        |  |  |  |  |              |              |              |              |
| T2HS13       | T2 | C09 | 0.911 | 0.860 | 0.860        | 0.039   | 22   | 0.864   |   |        |        |  |  |  |  |              |              |              |              |
| T2HS13       | T2 | C10 | 0.882 | 0.831 | 0.831        | 0.038   | 22   | 0.834   |   |        |        |  |  |  |  |              |              |              |              |
| T2HS24       | T2 | C11 | 0     | 0     | kleiner LLOQ | #VALUE! | 2,75 | #VALUE! |   |        |        |  |  |  |  |              |              |              |              |
| T2HS24       | T2 | C12 | 0     | 0     | kleiner LLOQ | #VALUE! | 2,75 | #VALUE! |   |        |        |  |  |  |  |              |              |              |              |
| 0            | T2 | D01 | 0     | 0     | kleiner LLOQ | #VALUE! | 1    | #VALUE! |   |        |        |  |  |  |  |              |              |              |              |
| 0            | T2 | D02 | 0     | 0     | kleiner LLOQ | #VALUE! | 1    | #VALUE! |   |        |        |  |  |  |  |              |              |              |              |
| 0            | T2 | D03 | 0     | 0     | kleiner LLOQ | #VALUE! | 1    | #VALUE! |   |        |        |  |  |  |  |              |              |              |              |
| 0            | T2 | D04 | 0     | 0     | kleiner LLOQ | #VALUE! | 1    | #VALUE! |   |        |        |  |  |  |  |              |              |              |              |
| 0            | T2 | D05 | 0     | 0     | kleiner LLOQ | #VALUE! | 1    | #VALUE! |   |        |        |  |  |  |  |              |              |              |              |
| 0            | T2 | D06 | 0     | 0     | kleiner LLOQ | #VALUE! | 1    | #VALUE! |   |        |        |  |  |  |  |              |              |              |              |
| 0            | T2 | D07 | 0     | 0     | kleiner LLOQ | #VALUE! | 1    | #VALUE! |   |        |        |  |  |  |  |              |              |              |              |
| 0            | T2 | D08 | 0     | 0     | kleiner LLOQ | #VALUE! | 1    | #VALUE! |   |        |        |  |  |  |  |              |              |              |              |
| 0            | T2 | D09 | 0     | 0     | kleiner LLOQ | #VALUE! | 1    | #VALUE! |   |        |        |  |  |  |  |              |              |              |              |
| 0            | T2 | D10 | 0     | 0     | kleiner LLOQ | #VALUE! | 1    | #VALUE! |   |        |        |  |  |  |  |              |              |              |              |
| 0            | T2 | D11 | 0     | 0     | kleiner LLOQ | #VALUE! | 1    | #VALUE! |   |        |        |  |  |  |  |              |              |              |              |
| 0            | T2 | D12 | 0     | 0     | kleiner LLOQ | #VALUE! | 1    | #VALUE! |   |        |        |  |  |  |  |              |              |              |              |
| 0            | T2 | E01 | 0     | 0     | kleiner LLOQ | #VALUE! | 1    | #VALUE! |   |        |        |  |  |  |  |              |              |              |              |
| 0            | T2 | E02 | 0     | 0     | kleiner LLOQ | #VALUE! | 1    | #VALUE! |   |        |        |  |  |  |  |              |              |              |              |
| 0            | T2 | E03 | 0     | 0     | kleiner LLOQ | #VALUE! | 1    | #VALUE! |   |        |        |  |  |  |  |              |              |              |              |
| 0            | T2 | E04 | 0     | 0     | kleiner LLOQ | #VALUE! | 1    | #VALUE! |   |        |        |  |  |  |  |              |              |              |              |
| 0            | T2 | E05 | 0     | 0     | kleiner LLOQ | #VALUE! | 1    | #VALUE! |   |        |        |  |  |  |  |              |              |              |              |
| 0            | T2 | E06 | 0     | 0     | kleiner LLOQ | #VALUE! | 1    | #VALUE! |   |        |        |  |  |  |  |              |              |              |              |
| 0            | T2 | E07 | 0     | 0     | kleiner LLOQ | #VALUE! | 1    | #VALUE! |   |        |        |  |  |  |  |              |              |              |              |
| 0            | T2 | E08 | 0     | 0     | kleiner LLOQ | #VALUE! | 1    | #VALUE! |   |        |        |  |  |  |  |              |              |              |              |
| 0            | T2 | E09 | 0     | 0     | kleiner LLOQ | #VALUE! | 1    | #VALUE! |   |        |        |  |  |  |  |              |              |              |              |
| 0            | T2 | E10 | 0     | 0     | kleiner LLOQ | #VALUE! | 1    | #VALUE! |   |        |        |  |  |  |  |              |              |              |              |
| 0            | T2 | E11 | 0     | 0     | kleiner LLOQ | #VALUE! | 1    | #VALUE! |   |        |        |  |  |  |  |              |              |              |              |
| 0            | T2 | F01 | 0     | 0     | kleiner LLOQ | #VALUE! | 1    | #VALUE! |   |        |        |  |  |  |  |              |              |              |              |
| 0            | T2 | F02 | 0     | 0     | kleiner LLOQ | #VALUE! | 1    | #VALUE! |   |        |        |  |  |  |  |              |              |              |              |
| 0            | T2 | F03 | 0     | 0     | kleiner LLOQ | #VALUE! | 1    | #VALUE! |   |        |        |  |  |  |  |              |              |              |              |
| 0            | T2 | F04 | 0     | 0     | kleiner LLOQ | #VALUE! | 1    | #VALUE! |   |        |        |  |  |  |  |              |              |              |              |
| 0            | T2 | F05 | 0     | 0     | kleiner LLOQ | #VALUE! | 1    | #VALUE! |   |        |        |  |  |  |  |              |              |              |              |
| 0            | T2 | F06 | 0     | 0     | kleiner LLOQ | #VALUE! | 1    | #VALUE! |   |        |        |  |  |  |  |              |              |              |              |
| 0            | T2 | F07 | 0     | 0     | kleiner LLOQ | #VALUE! | 1    | #VALUE! |   |        |        |  |  |  |  |              |              |              |              |
| 0            | T2 | F08 | 0     | 0     | kleiner LLOQ | #VALUE! | 1    | #VALUE! |   |        |        |  |  |  |  |              |              |              |              |
| 0            | T2 | F09 | 0     | 0     | kleiner LLOQ | #VALUE! | 1    | #VALUE! |   |        |        |  |  |  |  |              |              |              |              |
| 0            | T2 | F10 | 0     | 0     | kleiner LLOQ | #VALUE! | 1    | #VALUE! |   |        |        |  |  |  |  |              |              |              |              |
| 0            | T2 | F11 | 0     | 0     | kleiner LLOQ | #VALUE! | 1    | #VALUE! |   |        |        |  |  |  |  |              |              |              |              |
| 0            | T2 | F12 | 0     | 0     | kleiner LLOQ | #VALUE! | 1    | #VALUE! |   |        |        |  |  |  |  |              |              |              |              |
| T2HS11       | T2 | G01 | 0.490 | 0.439 | 0.439        | 0.019   | 132  | 2.543   |   |        |        |  |  |  |  |              |              |              |              |
| T2HS11       | T2 | G02 | 0.485 | 0.434 | 0.434        | 0.019   | 132  | 2.509   |   |        |        |  |  |  |  |              |              |              |              |
| 0            | T2 | G03 | 0     | 0     | kleiner LLOQ | #VALUE! | 1    | #VALUE! |   |        |        |  |  |  |  |              |              |              |              |
| 0            | T2 | G04 | 0     | 0     | kleiner LLOQ | #VALUE! | 1    | #VALUE! |   |        |        |  |  |  |  |              |              |              |              |
| 0            | T2 | G05 | 0     | 0     | kleiner LLOQ | #VALUE! | 1    | #VALUE! |   |        |        |  |  |  |  |              |              |              |              |
| 0            | T2 | G06 | 0     | 0     | kleiner LLOQ | #VALUE! | 1    | #VALUE! |   |        |        |  |  |  |  |              |              |              |              |
| Blank PEG    | T2 | G07 | 0     | 0     | kleiner LLOQ | #VALUE! | 2,75 | #VALUE! |   |        |        |  |  |  |  |              |              |              |              |
| Blank PEG    | T2 | G08 | 0     | 0     | kleiner LLOQ | #VALUE! | 2,75 | #VALUE! |   |        |        |  |  |  |  |              |              |              |              |
| Blank PEG    | T2 | G09 | 0     | 0     | kleiner LLOQ | #VALUE! | 2,75 | #VALUE! |   |        |        |  |  |  |  |              |              |              |              |
| Blank PEG    | T2 | G10 | 0     | 0     | kleiner LLOQ | #VALUE! | 2,75 | #VALUE! |   |        |        |  |  |  |  |              |              |              |              |
| Blank PEG    | T2 | G11 | 0     | 0     | kleiner LLOQ | #VALUE! | 2,75 | #VALUE! |   |        |        |  |  |  |  |              |              |              |              |
| Blank PEG    | T2 | G12 | 0     | 0     | kleiner LLOQ | #VALUE! | 2,75 | #VALUE! |   |        |        |  |  |  |  |              |              |              |              |
| 0            | T2 | H01 | 0     | 0     | kleiner LLOQ | #VALUE! | 1    | #VALUE! |   |        |        |  |  |  |  |              |              |              |              |
| 0            | T2 | H02 | 0     | 0     | kleiner LLOQ | #VALUE! | 1    | #VALUE! |   |        |        |  |  |  |  |              |              |              |              |
| 0            | T2 | H03 | 0     | 0     | kleiner LLOQ | #VALUE! | 1    | #VALUE! |   |        |        |  |  |  |  |              |              |              |              |
| 0            | T2 | H04 | 0     | 0     | kleiner LLOQ | #VALUE! | 1    | #VALUE! |   |        |        |  |  |  |  |              |              |              |              |
| 0            | T2 | H05 | 0     | 0     | kleiner LLOQ | #VALUE! | 1    | #VALUE! |   |        |        |  |  |  |  |              |              |              |              |
| 0            | T2 | H06 | 0     | 0     | kleiner LLOQ | #VALUE! | 1    | #VALUE! |   |        |        |  |  |  |  |              |              |              |              |
| Blank no PEG | T2 | H07 | 0     | 0     | kleiner LLOQ | #VALUE! | 2,75 | #VALUE! |   |        |        |  |  |  |  |              |              |              |              |
| Blank no PEG | T2 | H08 | 0     | 0     | kleiner LLOQ | #VALUE! | 2,75 | #VALUE! |   |        |        |  |  |  |  |              |              |              |              |
| Blank no PEG | T2 | H09 | 0     | 0     | kleiner LLOQ | #VALUE! | 2,75 | #VALUE! |   |        |        |  |  |  |  |              |              |              |              |
| Blank no PEG | T2 | H10 | 0     | 0     | kleiner LLOQ | #VALUE! | 2,75 | #VALUE! |   |        |        |  |  |  |  |              |              |              |              |
| Blank no PEG | T2 | H11 | 0     | 0     | kleiner LLOQ | #VALUE! | 2,75 | #VALUE! |   |        |        |  |  |  |  |              |              |              |              |
| Blank no PEG | T2 | H12 | 0     | 0     | kleiner LLOQ | #VALUE! | 2,75 | #VALUE! |   |        |        |  |  |  |  |              |              |              |              |
| 0            | T3 | A01 | 0     | 0     | kleiner LLOQ | #VALUE! | 1    | #VALUE! |   |        |        |  |  |  |  |              |              |              |              |
| 0            | T3 | A02 | 0     | 0     | kleiner LLOQ | #VALUE! | 1    | #VALUE! |   |        |        |  |  |  |  |              |              |              |              |
| 0            | T3 | A03 | 0     | 0     | kleiner LLOQ | #VALUE! | 1    | #VALUE! |   |        |        |  |  |  |  |              |              |              |              |
| 0            | T3 | A04 | 0     | 0     | kleiner LLOQ | #VALUE! | 1    | #VALUE! |   |        |        |  |  |  |  |              |              |              |              |

Comment:

Dil faktor 8\*2,75=dil.22  
Dil faktor 8\*6\*2,75=dil.132

Date Operator

Date Control



|           |    |     |       |       |              |         |       |         |
|-----------|----|-----|-------|-------|--------------|---------|-------|---------|
| T3HN1     | T3 | A05 | 0.460 | 0.409 | 0.409        | 0.018   | 2.75  | 0.049   |
| T3HN1     | T3 | A06 | 0.524 | 0.473 | 0.473        | 0.021   | 2.75  | 0.057   |
| T3HN2     | T3 | A07 | 0.298 | 0.247 | 0.247        | 0.010   | 2.75  | 0.028   |
| T3HN2     | T3 | A08 | 0.342 | 0.291 | 0.291        | 0.012   | 2.75  | 0.034   |
| T3HN3     | T3 | A09 | 0.392 | 0.341 | 0.341        | 0.015   | 2.75  | 0.040   |
| T3HN3     | T3 | A10 | 0.394 | 0.343 | 0.343        | 0.015   | 2.75  | 0.040   |
| T3HN4     | T3 | A11 | 0     | 0     | kleiner LLOQ | #VALUE! | 1     | #VALUE! |
| T3HN4     | T3 | A12 | 0     | 0     | kleiner LLOQ | #VALUE! | 1     | #VALUE! |
| 0         | T3 | B01 | 0     | 0     | kleiner LLOQ | #VALUE! | 1     | #VALUE! |
| 0         | T3 | B02 | 0     | 0     | kleiner LLOQ | #VALUE! | 1     | #VALUE! |
| 0         | T3 | B03 | 0     | 0     | kleiner LLOQ | #VALUE! | 1     | #VALUE! |
| 0         | T3 | B04 | 0     | 0     | kleiner LLOQ | #VALUE! | 1     | #VALUE! |
| 0         | T3 | B05 | 0     | 0     | kleiner LLOQ | #VALUE! | 1     | #VALUE! |
| 0         | T3 | B06 | 0     | 0     | kleiner LLOQ | #VALUE! | 1     | #VALUE! |
| 0         | T3 | B07 | 0     | 0     | kleiner LLOQ | #VALUE! | 1     | #VALUE! |
| 0         | T3 | B08 | 0     | 0     | kleiner LLOQ | #VALUE! | 1     | #VALUE! |
| 0         | T3 | B09 | 0     | 0     | kleiner LLOQ | #VALUE! | 1     | #VALUE! |
| 0         | T3 | B10 | 0     | 0     | kleiner LLOQ | #VALUE! | 1     | #VALUE! |
| T3HS14    | T3 | B11 | 0.144 | 0.093 | kleiner LLOQ | #VALUE! | 2.75  | #VALUE! |
| T3HS14    | T3 | B12 | 0.148 | 0.098 | kleiner LLOQ | #VALUE! | 2.75  | #VALUE! |
| 0         | T3 | C01 | 0     | 0     | kleiner LLOQ | #VALUE! | 1     | #VALUE! |
| 0         | T3 | C02 | 0     | 0     | kleiner LLOQ | #VALUE! | 1     | #VALUE! |
| 0         | T3 | C03 | 0     | 0     | kleiner LLOQ | #VALUE! | 1     | #VALUE! |
| 0         | T3 | C04 | 0     | 0     | kleiner LLOQ | #VALUE! | 1     | #VALUE! |
| T3HS21    | T3 | C05 | 0.766 | 0.715 | 0.715        | 0.032   | 24.75 | 0.802   |
| T3HS21    | T3 | C06 | 0.765 | 0.714 | 0.714        | 0.032   | 24.75 | 0.801   |
| T3HS22    | T3 | C07 | 0.780 | 0.729 | 0.729        | 0.033   | 24.75 | 0.818   |
| T3HS22    | T3 | C08 | 0.798 | 0.745 | 0.745        | 0.034   | 24.75 | 0.836   |
| T3HS23    | T3 | C09 | 0.634 | 0.583 | 0.583        | 0.026   | 24.75 | 0.646   |
| T3HS23    | T3 | C10 | 0.647 | 0.596 | 0.596        | 0.027   | 24.75 | 0.662   |
| T3HS24    | T3 | C11 | 0.110 | 0.060 | kleiner LLOQ | #VALUE! | 1     | #VALUE! |
| T3HS24    | T3 | C12 | 0.121 | 0.070 | kleiner LLOQ | #VALUE! | 1     | #VALUE! |
| 0         | T3 | D01 | 0     | 0     | kleiner LLOQ | #VALUE! | 1     | #VALUE! |
| 0         | T3 | D02 | 0     | 0     | kleiner LLOQ | #VALUE! | 1     | #VALUE! |
| 0         | T3 | D03 | 0     | 0     | kleiner LLOQ | #VALUE! | 1     | #VALUE! |
| 0         | T3 | D04 | 0     | 0     | kleiner LLOQ | #VALUE! | 1     | #VALUE! |
| 0         | T3 | D05 | 0     | 0     | kleiner LLOQ | #VALUE! | 1     | #VALUE! |
| 0         | T3 | D06 | 0     | 0     | kleiner LLOQ | #VALUE! | 1     | #VALUE! |
| 0         | T3 | D07 | 0     | 0     | kleiner LLOQ | #VALUE! | 1     | #VALUE! |
| 0         | T3 | D08 | 0     | 0     | kleiner LLOQ | #VALUE! | 1     | #VALUE! |
| 0         | T3 | D09 | 0     | 0     | kleiner LLOQ | #VALUE! | 1     | #VALUE! |
| 0         | T3 | D10 | 0     | 0     | kleiner LLOQ | #VALUE! | 1     | #VALUE! |
| 0         | T3 | D11 | 0     | 0     | kleiner LLOQ | #VALUE! | 1     | #VALUE! |
| 0         | T3 | D12 | 0     | 0     | kleiner LLOQ | #VALUE! | 1     | #VALUE! |
| 0         | T3 | E01 | 0     | 0     | kleiner LLOQ | #VALUE! | 1     | #VALUE! |
| 0         | T3 | E02 | 0     | 0     | kleiner LLOQ | #VALUE! | 1     | #VALUE! |
| 0         | T3 | E03 | 0     | 0     | kleiner LLOQ | #VALUE! | 1     | #VALUE! |
| 0         | T3 | E04 | 0     | 0     | kleiner LLOQ | #VALUE! | 1     | #VALUE! |
| 0         | T3 | E05 | 0     | 0     | kleiner LLOQ | #VALUE! | 1     | #VALUE! |
| 0         | T3 | E06 | 0     | 0     | kleiner LLOQ | #VALUE! | 1     | #VALUE! |
| 0         | T3 | E07 | 0     | 0     | kleiner LLOQ | #VALUE! | 1     | #VALUE! |
| 0         | T3 | E08 | 0     | 0     | kleiner LLOQ | #VALUE! | 1     | #VALUE! |
| 0         | T3 | E09 | 0     | 0     | kleiner LLOQ | #VALUE! | 1     | #VALUE! |
| 0         | T3 | E10 | 0     | 0     | kleiner LLOQ | #VALUE! | 1     | #VALUE! |
| 0         | T3 | E11 | 0     | 0     | kleiner LLOQ | #VALUE! | 1     | #VALUE! |
| 0         | T3 | E12 | 0     | 0     | kleiner LLOQ | #VALUE! | 1     | #VALUE! |
| 0         | T3 | F01 | 0     | 0     | kleiner LLOQ | #VALUE! | 1     | #VALUE! |
| 0         | T3 | F02 | 0     | 0     | kleiner LLOQ | #VALUE! | 1     | #VALUE! |
| 0         | T3 | F03 | 0     | 0     | kleiner LLOQ | #VALUE! | 1     | #VALUE! |
| 0         | T3 | F04 | 0     | 0     | kleiner LLOQ | #VALUE! | 1     | #VALUE! |
| 0         | T3 | F05 | 0     | 0     | kleiner LLOQ | #VALUE! | 1     | #VALUE! |
| 0         | T3 | F06 | 0     | 0     | kleiner LLOQ | #VALUE! | 1     | #VALUE! |
| 0         | T3 | F07 | 0     | 0     | kleiner LLOQ | #VALUE! | 1     | #VALUE! |
| 0         | T3 | F08 | 0     | 0     | kleiner LLOQ | #VALUE! | 1     | #VALUE! |
| 0         | T3 | F09 | 0     | 0     | kleiner LLOQ | #VALUE! | 1     | #VALUE! |
| 0         | T3 | F10 | 0     | 0     | kleiner LLOQ | #VALUE! | 1     | #VALUE! |
| 0         | T3 | F11 | 0     | 0     | kleiner LLOQ | #VALUE! | 1     | #VALUE! |
| 0         | T3 | F12 | 0     | 0     | kleiner LLOQ | #VALUE! | 1     | #VALUE! |
| 0         | T3 | G01 | 0     | 0     | kleiner LLOQ | #VALUE! | 1     | #VALUE! |
| 0         | T3 | G02 | 0     | 0     | kleiner LLOQ | #VALUE! | 1     | #VALUE! |
| 0         | T3 | G03 | 0     | 0     | kleiner LLOQ | #VALUE! | 1     | #VALUE! |
| 0         | T3 | G04 | 0     | 0     | kleiner LLOQ | #VALUE! | 1     | #VALUE! |
| 0         | T3 | G05 | 0     | 0     | kleiner LLOQ | #VALUE! | 1     | #VALUE! |
| 0         | T3 | G06 | 0     | 0     | kleiner LLOQ | #VALUE! | 1     | #VALUE! |
| Blank PEG | T3 | G07 | 0     | 0     | kleiner LLOQ | #VALUE! | 2.75  | #VALUE! |
| Blank PEG | T3 | G08 | 0     | 0     | kleiner LLOQ | #VALUE! | 2.75  | #VALUE! |

Plate: T3

|   | 1 | 2 | 3 | 4 | 5     | 6     | 7     | 8     | 9     | 10    | 11    | 12    |
|---|---|---|---|---|-------|-------|-------|-------|-------|-------|-------|-------|
| A |   |   |   |   | 0.460 | 0.524 | 0.298 | 0.342 | 0.392 | 0.394 | 0.138 | 0.152 |
| B |   |   |   |   |       |       |       |       |       |       | 0.144 | 0.148 |
| C |   |   |   |   | 0.766 | 0.765 | 0.780 | 0.796 | 0.634 | 0.647 | 0.110 | 0.121 |
| D |   |   |   |   |       |       |       |       |       |       |       |       |
| E |   |   |   |   |       |       |       |       |       |       |       |       |
| F |   |   |   |   |       |       |       |       |       |       |       |       |
| G |   |   |   |   |       |       | 0.052 | 0.048 | 0.052 | 0.052 | 0.047 | 0.046 |
| H |   |   |   |   |       |       | 0.051 | 0.060 | 0.059 | 0.054 | 0.055 |       |

Plattenbelegung

|   | 1 | 2 | 3 | 4 | 5      | 6      | 7            | 8            | 9            | 10           | 11           | 12           |
|---|---|---|---|---|--------|--------|--------------|--------------|--------------|--------------|--------------|--------------|
| A |   |   |   |   | T3HN1  | T3HN1  | T3HN2        | T3HN2        | T3HN3        | T3HN3        | T3HN4        | T3HN4        |
| B |   |   |   |   |        |        |              |              |              |              |              |              |
| C |   |   |   |   | T3HS21 | T3HS21 | T3HS22       | T3HS22       | T3HS23       | T3HS23       | T3HS24       | T3HS24       |
| D |   |   |   |   |        |        |              |              |              |              |              |              |
| E |   |   |   |   |        |        |              |              |              |              |              |              |
| F |   |   |   |   |        |        |              |              |              |              |              |              |
| G |   |   |   |   |        |        | Blank PEG    | Blank PEG    | Blank PEG    | Blank PEG    | Blank PEG    | Blank PEG    |
| H |   |   |   |   |        |        | Blank no PEG | Blank no PEG | Blank no PEG | Blank no PEG | Blank no PEG | Blank no PEG |

dil9\*2,75=dil24,75

Comment:

Date Operator Date Control

|              |    |     |   |   |              |         |      |         |
|--------------|----|-----|---|---|--------------|---------|------|---------|
| Blank PEG    | T3 | G09 | 0 | 0 | kleiner LLOQ | #VALUE! | 2.75 | #VALUE! |
| Blank PEG    | T3 | G10 | 0 | 0 | kleiner LLOQ | #VALUE! | 2.75 | #VALUE! |
| Blank PEG    | T3 | G11 | 0 | 0 | kleiner LLOQ | #VALUE! | 2.75 | #VALUE! |
| Blank PEG    | T3 | G12 | 0 | 0 | kleiner LLOQ | #VALUE! | 2.75 | #VALUE! |
| 0            | T3 | H01 | 0 | 0 | kleiner LLOQ | #VALUE! | 1    | #VALUE! |
| 0            | T3 | H02 | 0 | 0 | kleiner LLOQ | #VALUE! | 1    | #VALUE! |
| 0            | T3 | H03 | 0 | 0 | kleiner LLOQ | #VALUE! | 1    | #VALUE! |
| 0            | T3 | H04 | 0 | 0 | kleiner LLOQ | #VALUE! | 1    | #VALUE! |
| 0            | T3 | H05 | 0 | 0 | kleiner LLOQ | #VALUE! | 1    | #VALUE! |
| 0            | T3 | H06 | 0 | 0 | kleiner LLOQ | #VALUE! | 1    | #VALUE! |
| Blank no PEG | T3 | H07 | 0 | 0 | kleiner LLOQ | #VALUE! | 2.75 | #VALUE! |
| Blank no PEG | T3 | H08 | 0 | 0 | kleiner LLOQ | #VALUE! | 2.75 | #VALUE! |
| Blank no PEG | T3 | H09 | 0 | 0 | kleiner LLOQ | #VALUE! | 2.75 | #VALUE! |
| Blank no PEG | T3 | H10 | 0 | 0 | kleiner LLOQ | #VALUE! | 2.75 | #VALUE! |
| Blank no PEG | T3 | H11 | 0 | 0 | kleiner LLOQ | #VALUE! | 2.75 | #VALUE! |
| Blank no PEG | T3 | H12 | 0 | 0 | kleiner LLOQ | #VALUE! | 2.75 | #VALUE! |

**Messdaten (diese Tabelle in Bericht übernehmen)**

| Sample name * | concentration (theor.) * | measured data | measured data | measured data | mean measured | SD   | RSD  | Blank * | measured data after * Blank subtraction | concentration (calc.) * | Deviation * | Residuen |
|---------------|--------------------------|---------------|---------------|---------------|---------------|------|------|---------|-----------------------------------------|-------------------------|-------------|----------|
|               | [µg/mL]                  | [AU]          | [AU]          | [AU]          | [AU]          | [AU] | [%]  | [AU]    |                                         | [µg/mL]                 | [%]         |          |
| KLP1          | 0.148                    | 1.579         | 1.652         | 1.627         | 1.62          | 0.03 | 1.87 | 0.047   | 1.568                                   | 0.148                   | -0.24       | 0.00     |
| KLP2          | 0.114                    | 1.357         | 1.443         | 1.372         | 1.39          | 0.04 | 2.70 | 0.054   | 1.340                                   | 0.110                   | -3.40       | 0.00     |
| KLP3          | 0.074                    | 1.272         | 1.193         | 1.228         | 1.23          | 0.03 | 2.63 | 0.051   | 1.180                                   | 0.084                   | 13.04       | 0.01     |
| KLP4          | 0.041                    | 0.959         | 0.972         | 0.883         | 0.94          | 0.04 | 4.19 | 0.051   | 0.887                                   | 0.035                   | -13.32      | -0.01    |
| KLP5          |                          |               |               |               |               |      |      | 0.052   |                                         |                         |             |          |
| KLP6          |                          |               |               |               |               |      |      | 0.051   |                                         |                         |             |          |
| KLP7          |                          |               |               |               |               |      |      |         |                                         |                         |             |          |
| KLP8          |                          |               |               |               |               |      |      |         |                                         |                         |             |          |

**Statistical data**

|                                                         |                                          |                     |             |
|---------------------------------------------------------|------------------------------------------|---------------------|-------------|
| Geradensteigung                                         | Slope                                    | m                   | 6.05        |
| Y-Achsenabschnitt                                       | Y-intercept                              | b                   | 0.67        |
| Standardabw. Geradensteigung                            | SD-Slope                                 | S <sub>m</sub>      | 0.620291227 |
| Standardabw. Achsenabschnittes                          | SD-Y-Intercept                           | S <sub>b</sub>      | 0.063694294 |
| Anzahl Messpunkte                                       | number of measuring points               | n                   | 4           |
| Quadratsumme                                            | sum of squares                           | Q <sub>xx</sub>     | 0.006579604 |
| Bereichsmittle                                          |                                          |                     | 0.094336926 |
| Freiheitsgrade                                          | degree of freedom                        | f                   | 2           |
| Student-t-Faktor für (P = 95 %; f = n-2)                | Student-t-factor for (P = 95 %; f = n-2) | t                   | 4.303       |
| Vertrauensbereich Steig. (95 %) Obergrenze              |                                          | m + VB <sub>m</sub> | 8.722319527 |
| Vertrauensbereich Steig. (95 %) Untergrenze             |                                          | m - VB <sub>m</sub> | 3.384093228 |
| Vertrauensbereich Achsenabschnitt (95 %) O <sub>g</sub> |                                          | b + VB <sub>b</sub> | 0.946914615 |
| Vertrauensbereich Achsenabschnitt (95 %) U <sub>g</sub> |                                          | b - VB <sub>b</sub> | 0.398761518 |
| Korrelationskoeffizient                                 | correlation coefficient                  | r                   | 0.9897      |
| Bestimmtheitsmaß                                        | determination coefficient                | r <sup>2</sup>      | 0.9794      |
| Reststandardabweichung                                  |                                          | S <sub>0</sub>      | 0.050310948 |
| Summe Restquadrate                                      |                                          | sd                  | 2.895583345 |
| Verfahrensstandardabw.                                  |                                          | S <sub>00</sub>     | 0.008311454 |
| Rel. Verfahrensstandardabw. %                           |                                          | V <sub>00</sub>     | 8.810393374 |

|                          |       |
|--------------------------|-------|
| mean Blank               | 0     |
| SD Blank                 | 0.00  |
| RSD Blank                | 3.79  |
| x <sup>2</sup> SD (LLOQ) | 0     |
| x <sup>2</sup> SD (LOD)  | 3     |
| LLOQ (AU)                | 0     |
| LOD (AU)                 | 0     |
| ULOQ                     | 1.568 |
| LLOQ (Lin)               | 0.887 |

**Evaluation / Comment**

LDH linearity valid with 7 standards, split in lin high and lin low, each with 4 standards and KLP4 common standard for both. R<sup>2</sup> 0,9981, deviations for both between -13.34% and +13.04%

Date \_\_\_\_\_ Operator \_\_\_\_\_ Date \_\_\_\_\_ Control \_\_\_\_\_

Figure 1 Linearity

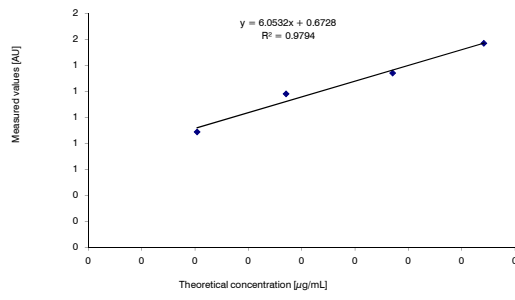

Figure 2 Method validation Residuen Plot

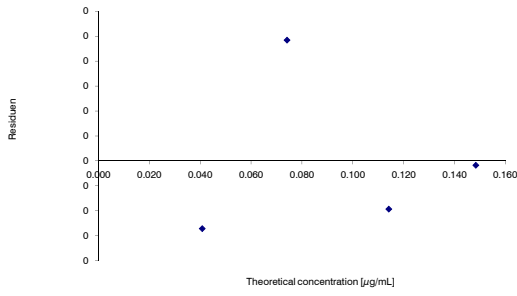

Evaluation / Comment

lin passed

Date

Operator

Date

Control

| Sample name | Plate | Position | [AU]  | [AU]-Blank | Rating       | [µg/mL] | Dilution factor | [µg/mL] |
|-------------|-------|----------|-------|------------|--------------|---------|-----------------|---------|
| 0           | TO    | A01      | 0     | 0          | kleiner LLOQ | #VALUE! | 1               | #VALUE! |
| 0           | TO    | A02      | 0     | 0          | kleiner LLOQ | #VALUE! | 1               | #VALUE! |
| 0           | TO    | A03      | 0     | 0          | kleiner LLOQ | #VALUE! | 1               | #VALUE! |
| 0           | TO    | A04      | 0     | 0          | kleiner LLOQ | #VALUE! | 1               | #VALUE! |
| TOHN1       | TO    | A05      | 1.126 | 1.075      | 1.075        | 0.066   | 88              | 5.847   |
| TOHN1       | TO    | A06      | 1.411 | 1.360      | 1.360        | 0.114   | 88              | 9.991   |
| TOHN2       | TO    | A07      | 0     | 0          | kleiner LLOQ | #VALUE! | 1               | #VALUE! |
| TOHN2       | TO    | A08      | 0     | 0          | kleiner LLOQ | #VALUE! | 1               | #VALUE! |
| TOHN3       | TO    | A09      | 1.266 | 1.215      | 1.215        | 0.090   | 88              | 7.883   |
| TOHN3       | TO    | A10      | 1.141 | 1.090      | 1.090        | 0.069   | 88              | 6.066   |
| TOHN4       | TO    | A11      | 0     | 0          | kleiner LLOQ | #VALUE! | 1               | #VALUE! |
| TOHN4       | TO    | A12      | 0     | 0          | kleiner LLOQ | #VALUE! | 1               | #VALUE! |
| 0           | TO    | B01      | 0     | 0          | kleiner LLOQ | #VALUE! | 1               | #VALUE! |
| 0           | TO    | B02      | 0     | 0          | kleiner LLOQ | #VALUE! | 1               | #VALUE! |
| 0           | TO    | B03      | 0     | 0          | kleiner LLOQ | #VALUE! | 1               | #VALUE! |
| 0           | TO    | B04      | 0     | 0          | kleiner LLOQ | #VALUE! | 1               | #VALUE! |
| TOHS11      | TO    | B05      | 0     | 0          | kleiner LLOQ | #VALUE! | 1               | #VALUE! |
| TOHS11      | TO    | B06      | 1.610 | 1.559      | 1.559        | 0.146   | 88              | 12.884  |
| TOHS12      | TO    | B07      | 1.471 | 1.420      | 1.420        | 0.123   | 88              | 10.863  |
| TOHS12      | TO    | B08      | 1.476 | 1.425      | 1.425        | 0.124   | 88              | 10.936  |
| TOHS13      | TO    | B09      | 0     | 0          | kleiner LLOQ | #VALUE! | 1               | #VALUE! |
| TOHS13      | TO    | B10      | 0     | 0          | kleiner LLOQ | #VALUE! | 1               | #VALUE! |
| TOHS14      | TO    | B11      | 0     | 0          | kleiner LLOQ | #VALUE! | 1               | #VALUE! |
| TOHS14      | TO    | B12      | 0     | 0          | kleiner LLOQ | #VALUE! | 1               | #VALUE! |
| 0           | TO    | C01      | 0     | 0          | kleiner LLOQ | #VALUE! | 1               | #VALUE! |
| 0           | TO    | C02      | 0     | 0          | kleiner LLOQ | #VALUE! | 1               | #VALUE! |
| 0           | TO    | C03      | 0     | 0          | kleiner LLOQ | #VALUE! | 1               | #VALUE! |
| 0           | TO    | C04      | 0     | 0          | kleiner LLOQ | #VALUE! | 1               | #VALUE! |
| TOHS21      | TO    | C05      | 1.619 | 1.568      | 1.568        | 0.148   | 88              | 13.015  |
| TOHS21      | TO    | C06      | 1.359 | 1.308      | 1.308        | 0.105   | 88              | 9.235   |
| TOHS22      | TO    | C07      | 1.118 | 1.067      | 1.067        | 0.085   | 88              | 5.731   |
| TOHS22      | TO    | C08      | 1.137 | 1.086      | 1.086        | 0.088   | 88              | 6.007   |
| TOHS23      | TO    | C09      | 1.055 | 1.004      | 1.004        | 0.055   | 88              | 4.815   |
| TOHS23      | TO    | C10      | 0.994 | 0.943      | 0.943        | 0.045   | 88              | 3.928   |
| TOHS24      | TO    | C11      | 0     | 0          | kleiner LLOQ | #VALUE! | 1               | #VALUE! |
| TOHS24      | TO    | C12      | 0     | 0          | kleiner LLOQ | #VALUE! | 1               | #VALUE! |
| 0           | TO    | D01      | 0     | 0          | kleiner LLOQ | #VALUE! | 1               | #VALUE! |
| 0           | TO    | D02      | 0     | 0          | kleiner LLOQ | #VALUE! | 1               | #VALUE! |
| 0           | TO    | D03      | 0     | 0          | kleiner LLOQ | #VALUE! | 1               | #VALUE! |
| 0           | TO    | D04      | 0     | 0          | kleiner LLOQ | #VALUE! | 1               | #VALUE! |
| 0           | TO    | D05      | 0     | 0          | kleiner LLOQ | #VALUE! | 1               | #VALUE! |
| 0           | TO    | D06      | 0     | 0          | kleiner LLOQ | #VALUE! | 1               | #VALUE! |
| 0           | TO    | D07      | 0     | 0          | kleiner LLOQ | #VALUE! | 1               | #VALUE! |
| 0           | TO    | D08      | 0     | 0          | kleiner LLOQ | #VALUE! | 1               | #VALUE! |
| 0           | TO    | D09      | 0     | 0          | kleiner LLOQ | #VALUE! | 1               | #VALUE! |
| 0           | TO    | D10      | 0     | 0          | kleiner LLOQ | #VALUE! | 1               | #VALUE! |
| 0           | TO    | D11      | 0     | 0          | kleiner LLOQ | #VALUE! | 1               | #VALUE! |
| 0           | TO    | D12      | 0     | 0          | kleiner LLOQ | #VALUE! | 1               | #VALUE! |

Plate: TO

|   | 1 | 2 | 3 | 4 | 5     | 6     | 7     | 8     | 9     | 10    | 11    | 12    |
|---|---|---|---|---|-------|-------|-------|-------|-------|-------|-------|-------|
| A |   |   |   |   | 1.126 | 1.411 |       |       | 1.266 | 1.141 |       |       |
| B |   |   |   |   |       | 1.610 | 1.471 | 1.476 |       |       |       |       |
| C |   |   |   |   | 1.619 | 1.359 | 1.118 | 1.137 | 1.055 | 0.994 |       |       |
| D |   |   |   |   |       |       |       |       |       |       |       |       |
| E |   |   |   |   |       |       |       |       |       |       |       |       |
| F |   |   |   |   |       |       |       |       |       |       |       |       |
| G |   |   |   |   |       |       | 0.061 | 0.065 | 0.056 | 0.055 | 0.055 | 0.057 |
| H |   |   |   |   |       |       | 0.051 | 0.05  | 0.051 | 0.05  | 0.05  | 0.049 |

| Plattenbelegung |   |   |   |   |        |        |        |              |              |              |              |              |
|-----------------|---|---|---|---|--------|--------|--------|--------------|--------------|--------------|--------------|--------------|
|                 | 1 | 2 | 3 | 4 | 5      | 6      | 7      | 8            | 9            | 10           | 11           | 12           |
| A               |   |   |   |   | TOHN1  | TOHN1  | TOHN2  | TOHN2        | TOHN3        | TOHN3        | TOHN4        | TOHN4        |
| B               |   |   |   |   | TOHS11 | TOHS11 | TOHS12 | TOHS12       | TOHS13       | TOHS13       | TOHS14       | TOHS14       |
| C               |   |   |   |   | TOHS21 | TOHS21 | TOHS22 | TOHS22       | TOHS23       | TOHS23       | TOHS24       | TOHS24       |
| D               |   |   |   |   |        |        |        |              |              |              |              |              |
| E               |   |   |   |   |        |        |        |              |              |              |              |              |
| F               |   |   |   |   |        |        |        |              |              |              |              |              |
| G               |   |   |   |   |        |        |        | Blank PEG    | Blank PEG    | Blank PEG    | Blank PEG    | Blank PEG    |
| H               |   |   |   |   |        |        |        | Blank no PEG | Blank no PEG | Blank no PEG | Blank no PEG | Blank no PEG |

Comment:  
 Erste 4 Reihen immer Testmessung zur Evaluierung der benötigten Verdünnung. Wird nicht mit ausgewertet. Unverdünte Messungen außerhalb der Linearität werden ebenfalls nicht ausgewertet. Dil.Faktor unverdünnte samples=2,75 (100µl sample+100µlRM+75µl stop sol.) Verdünnung Dil.8 Dil.8\*Dil.2,75=Dil.22, Rot= 2\* verdünnt, Dil4 und Dil 8, also Dil 2,75\*Dil8\*Dil4=Dil88

Samples aufgeteilt in lin high und low;niedriger konzentrierte Samples bei lin low zu finden.

Date Operator Date Control

|              |    |     |       |        |              |         |      |         |
|--------------|----|-----|-------|--------|--------------|---------|------|---------|
| 0            | T0 | E01 | 0     | 0      | kleiner LLOQ | #VALUE! | 1    | #VALUE! |
| 0            | T0 | E02 | 0     | 0      | kleiner LLOQ | #VALUE! | 1    | #VALUE! |
| 0            | T0 | E03 | 0     | 0      | kleiner LLOQ | #VALUE! | 1    | #VALUE! |
| 0            | T0 | E04 | 0     | 0      | kleiner LLOQ | #VALUE! | 1    | #VALUE! |
| 0            | T0 | E05 | 0     | 0      | kleiner LLOQ | #VALUE! | 1    | #VALUE! |
| 0            | T0 | E06 | 0     | 0      | kleiner LLOQ | #VALUE! | 1    | #VALUE! |
| 0            | T0 | E07 | 0     | 0      | kleiner LLOQ | #VALUE! | 1    | #VALUE! |
| 0            | T0 | E08 | 0     | 0      | kleiner LLOQ | #VALUE! | 1    | #VALUE! |
| 0            | T0 | E09 | 0     | 0      | kleiner LLOQ | #VALUE! | 1    | #VALUE! |
| 0            | T0 | E10 | 0     | 0      | kleiner LLOQ | #VALUE! | 1    | #VALUE! |
| 0            | T0 | E11 | 0     | 0      | kleiner LLOQ | #VALUE! | 1    | #VALUE! |
| 0            | T0 | E12 | 0     | 0      | kleiner LLOQ | #VALUE! | 1    | #VALUE! |
| 0            | T0 | F01 | 0     | 0      | kleiner LLOQ | #VALUE! | 1    | #VALUE! |
| 0            | T0 | F02 | 0     | 0      | kleiner LLOQ | #VALUE! | 1    | #VALUE! |
| 0            | T0 | F03 | 0     | 0      | kleiner LLOQ | #VALUE! | 1    | #VALUE! |
| 0            | T0 | F04 | 0     | 0      | kleiner LLOQ | #VALUE! | 1    | #VALUE! |
| 0            | T0 | F05 | 0     | 0      | kleiner LLOQ | #VALUE! | 1    | #VALUE! |
| 0            | T0 | F06 | 0     | 0      | kleiner LLOQ | #VALUE! | 1    | #VALUE! |
| 0            | T0 | F07 | 0     | 0      | kleiner LLOQ | #VALUE! | 1    | #VALUE! |
| 0            | T0 | F08 | 0     | 0      | kleiner LLOQ | #VALUE! | 1    | #VALUE! |
| 0            | T0 | F09 | 0     | 0      | kleiner LLOQ | #VALUE! | 1    | #VALUE! |
| 0            | T0 | F10 | 0     | 0      | kleiner LLOQ | #VALUE! | 1    | #VALUE! |
| 0            | T0 | F11 | 0     | 0      | kleiner LLOQ | #VALUE! | 1    | #VALUE! |
| 0            | T0 | F12 | 0     | 0      | kleiner LLOQ | #VALUE! | 1    | #VALUE! |
| 0            | T0 | G01 | 0     | 0      | kleiner LLOQ | #VALUE! | 1    | #VALUE! |
| 0            | T0 | G02 | 0     | 0      | kleiner LLOQ | #VALUE! | 1    | #VALUE! |
| 0            | T0 | G03 | 0     | 0      | kleiner LLOQ | #VALUE! | 1    | #VALUE! |
| 0            | T0 | G04 | 0     | 0      | kleiner LLOQ | #VALUE! | 1    | #VALUE! |
| 0            | T0 | G05 | 0     | 0      | kleiner LLOQ | #VALUE! | 1    | #VALUE! |
| 0            | T0 | G06 | 0     | 0      | kleiner LLOQ | #VALUE! | 1    | #VALUE! |
| Blank PEG    | T0 | G07 | 0.061 | 0.010  | kleiner LLOQ | #VALUE! | 2.75 | #VALUE! |
| Blank PEG    | T0 | G08 | 0.065 | 0.014  | kleiner LLOQ | #VALUE! | 2.75 | #VALUE! |
| Blank PEG    | T0 | G09 | 0.056 | 0.005  | kleiner LLOQ | #VALUE! | 2.75 | #VALUE! |
| Blank PEG    | T0 | G10 | 0.055 | 0.004  | kleiner LLOQ | #VALUE! | 2.75 | #VALUE! |
| Blank PEG    | T0 | G11 | 0.055 | 0.004  | kleiner LLOQ | #VALUE! | 2.75 | #VALUE! |
| Blank PEG    | T0 | G12 | 0.057 | 0.006  | kleiner LLOQ | #VALUE! | 2.75 | #VALUE! |
| 0            | T0 | H01 | 0     | 0      | kleiner LLOQ | #VALUE! | 1    | #VALUE! |
| 0            | T0 | H02 | 0     | 0      | kleiner LLOQ | #VALUE! | 1    | #VALUE! |
| 0            | T0 | H03 | 0     | 0      | kleiner LLOQ | #VALUE! | 1    | #VALUE! |
| 0            | T0 | H04 | 0     | 0      | kleiner LLOQ | #VALUE! | 1    | #VALUE! |
| 0            | T0 | H05 | 0     | 0      | kleiner LLOQ | #VALUE! | 1    | #VALUE! |
| 0            | T0 | H06 | 0     | 0      | kleiner LLOQ | #VALUE! | 1    | #VALUE! |
| Blank no PEG | T0 | H07 | 0.051 | 0.000  | kleiner LLOQ | #VALUE! | 2.75 | #VALUE! |
| Blank no PEG | T0 | H08 | 0.050 | -0.001 | kleiner LLOQ | #VALUE! | 2.75 | #VALUE! |
| Blank no PEG | T0 | H09 | 0.051 | 0.000  | kleiner LLOQ | #VALUE! | 2.75 | #VALUE! |
| Blank no PEG | T0 | H10 | 0.050 | -0.001 | kleiner LLOQ | #VALUE! | 2.75 | #VALUE! |
| Blank no PEG | T0 | H11 | 0.050 | -0.001 | kleiner LLOQ | #VALUE! | 2.75 | #VALUE! |
| Blank no PEG | T0 | H12 | 0.049 | -0.002 | kleiner LLOQ | #VALUE! | 2.75 | #VALUE! |

|        |    |     |       |       |              |         |      |         |
|--------|----|-----|-------|-------|--------------|---------|------|---------|
| 0      | T1 | A01 | 0     | 0     | kleiner LLOQ | #VALUE! | 1    | #VALUE! |
| 0      | T1 | A02 | 0     | 0     | kleiner LLOQ | #VALUE! | 1    | #VALUE! |
| 0      | T1 | A03 | 0     | 0     | kleiner LLOQ | #VALUE! | 1    | #VALUE! |
| 0      | T1 | A04 | 0     | 0     | kleiner LLOQ | #VALUE! | 1    | #VALUE! |
| T1HN1  | T1 | A05 | 1.200 | 1.149 | 1.149        | 0.079   | 2.75 | 0.216   |
| T1HN1  | T1 | A06 | 1.072 | 1.021 | 1.021        | 0.058   | 2.75 | 0.158   |
| 0      | T1 | A07 | 0     | 0     | kleiner LLOQ | #VALUE! | 1    | #VALUE! |
| 0      | T1 | A08 | 0     | 0     | kleiner LLOQ | #VALUE! | 1    | #VALUE! |
| 0      | T1 | A09 | 1.266 | 1.215 | 1.215        | 0.090   | 2.75 | 0.246   |
| 0      | T1 | A10 | 1.141 | 1.090 | 1.090        | 0.069   | 2.75 | 0.190   |
| 0      | T1 | A11 | 0     | 0     | kleiner LLOQ | #VALUE! | 1    | #VALUE! |
| 0      | T1 | A12 | 0     | 0     | kleiner LLOQ | #VALUE! | 1    | #VALUE! |
| 0      | T1 | B01 | 0     | 0     | kleiner LLOQ | #VALUE! | 1    | #VALUE! |
| 0      | T1 | B02 | 0     | 0     | kleiner LLOQ | #VALUE! | 1    | #VALUE! |
| 0      | T1 | B03 | 0     | 0     | kleiner LLOQ | #VALUE! | 1    | #VALUE! |
| 0      | T1 | B04 | 0     | 0     | kleiner LLOQ | #VALUE! | 1    | #VALUE! |
| T1HS11 | T1 | B05 | 0     | 0     | kleiner LLOQ | #VALUE! | 1    | #VALUE! |
| T1HS11 | T1 | B06 | 0     | 0     | kleiner LLOQ | #VALUE! | 1    | #VALUE! |
| T1HS12 | T1 | B07 | 1.575 | 1.524 | 1.524        | 0.141   | 2.75 | 0.387   |
| T1HS12 | T1 | B08 | 1.474 | 1.423 | 1.423        | 0.124   | 2.75 | 0.341   |
| T1HS13 | T1 | B09 | 1.325 | 1.274 | 1.274        | 0.099   | 2.75 | 0.273   |
| T1HS13 | T1 | B10 | 1.299 | 1.248 | 1.248        | 0.095   | 2.75 | 0.261   |
| 0      | T1 | B11 | 0     | 0     | kleiner LLOQ | #VALUE! | 1    | #VALUE! |
| 0      | T1 | B12 | 0     | 0     | kleiner LLOQ | #VALUE! | 1    | #VALUE! |
| 0      | T1 | C01 | 0     | 0     | kleiner LLOQ | #VALUE! | 1    | #VALUE! |
| 0      | T1 | C02 | 0     | 0     | kleiner LLOQ | #VALUE! | 1    | #VALUE! |
| 0      | T1 | C03 | 0     | 0     | kleiner LLOQ | #VALUE! | 1    | #VALUE! |
| 0      | T1 | C04 | 0     | 0     | kleiner LLOQ | #VALUE! | 1    | #VALUE! |
| T1HS21 | T1 | C05 | 1.216 | 1.165 | 1.165        | 0.081   | 2.75 | 0.223   |
| T1HS21 | T1 | C06 | 1.428 | 1.377 | 1.377        | 0.116   | 2.75 | 0.320   |
| T1HS22 | T1 | C07 | 1.153 | 1.102 | 1.102        | 0.071   | 2.75 | 0.195   |
| T1HS22 | T1 | C08 | 1.237 | 1.186 | 1.186        | 0.085   | 2.75 | 0.233   |
| T1HS23 | T1 | C09 | 1.217 | 1.166 | 1.166        | 0.082   | 2.75 | 0.224   |
| T1HS23 | T1 | C10 | 1.351 | 1.300 | 1.300        | 0.104   | 2.75 | 0.265   |
| 0      | T1 | C11 | 0     | 0     | kleiner LLOQ | #VALUE! | 1    | #VALUE! |
| 0      | T1 | C12 | 0     | 0     | kleiner LLOQ | #VALUE! | 1    | #VALUE! |
| 0      | T1 | D01 | 0     | 0     | kleiner LLOQ | #VALUE! | 1    | #VALUE! |
| 0      | T1 | D02 | 0     | 0     | kleiner LLOQ | #VALUE! | 1    | #VALUE! |
| 0      | T1 | D03 | 0     | 0     | kleiner LLOQ | #VALUE! | 1    | #VALUE! |
| 0      | T1 | D04 | 0     | 0     | kleiner LLOQ | #VALUE! | 1    | #VALUE! |
| 0      | T1 | D05 | 0     | 0     | kleiner LLOQ | #VALUE! | 1    | #VALUE! |
| 0      | T1 | D06 | 0     | 0     | kleiner LLOQ | #VALUE! | 1    | #VALUE! |
| 0      | T1 | D07 | 0     | 0     | kleiner LLOQ | #VALUE! | 1    | #VALUE! |
| 0      | T1 | D08 | 0     | 0     | kleiner LLOQ | #VALUE! | 1    | #VALUE! |
| 0      | T1 | D09 | 0     | 0     | kleiner LLOQ | #VALUE! | 1    | #VALUE! |
| 0      | T1 | D10 | 0     | 0     | kleiner LLOQ | #VALUE! | 1    | #VALUE! |
| 0      | T1 | D11 | 0     | 0     | kleiner LLOQ | #VALUE! | 1    | #VALUE! |
| 0      | T1 | D12 | 0     | 0     | kleiner LLOQ | #VALUE! | 1    | #VALUE! |

Plate: T1

|   |   |   |       |   |       |       |       |       |       |       |       |       |
|---|---|---|-------|---|-------|-------|-------|-------|-------|-------|-------|-------|
|   | 1 | 2 | 3     | 4 | 5     | 6     | 7     | 8     | 9     | 10    | 11    | 12    |
| A |   |   |       |   | 1.200 | 1.072 |       |       | 1.266 | 1.141 |       |       |
| B |   |   |       |   |       |       | 1.575 | 1.474 | 1.325 | 1.299 |       |       |
| C |   |   |       |   | 1.216 | 1.428 | 1.153 | 1.237 | 1.217 | 1.351 |       |       |
| D |   |   |       |   |       |       |       |       |       |       |       |       |
| E |   |   |       |   |       |       |       |       |       |       |       |       |
| F |   |   |       |   |       |       |       |       |       |       |       |       |
| G |   |   | 0.998 |   |       |       | 0.064 | 0.054 | 0.052 | 0.056 | 0.051 | 0.055 |
| H |   |   |       |   |       |       | 0.051 | 0.051 | 0.051 | 0.052 | 0.052 | 0.052 |

Plattenbelegung

|   |   |   |          |          |        |        |              |              |              |              |              |              |
|---|---|---|----------|----------|--------|--------|--------------|--------------|--------------|--------------|--------------|--------------|
|   | 1 | 2 | 3        | 4        | 5      | 6      | 7            | 8            | 9            | 10           | 11           | 12           |
| A |   |   |          |          | T1HN1  | T1HN1  |              |              |              |              |              |              |
| B |   |   |          |          | T1HS11 | T1HS11 | T1HS12       | T1HS12       | T1HS13       | T1HS13       |              |              |
| C |   |   |          |          | T1HS21 | T1HS21 | T1HS22       | T1HS22       | T1HS23       | T1HS23       |              |              |
| D |   |   |          |          |        |        |              |              |              |              |              |              |
| E |   |   |          |          |        |        |              |              |              |              |              |              |
| F |   |   |          |          |        |        |              |              |              |              |              |              |
| G |   |   | T1HS11WH | T1HS11WH |        |        | Blank PEG    | Blank PEG    | Blank PEG    | Blank PEG    | Blank PEG    | Blank PEG    |
| H |   |   |          |          |        |        | Blank no Peg | Blank no Peg | Blank no Peg | Blank no Peg | Blank no Peg | Blank no Peg |

Comment:

Erste 4 Reihen immer Testmessung zur Evaluierung der benötigten Verdünnung. Wird nicht mit ausgewertet. Unverdünnte Messungen außerhalb der Linearität werden ebenfalls nicht ausgewertet. Dil.Faktor unverdünnte samples=2,75 (100µl sample+100µlRM+75µl stop sol.) Verdünnung (gelb) Dil.5\*dil2,75=dil 13,5; rot dil 9\*dil9\*dil2,75=dil81

Date Operator

Date Control

|              |    |     |       |       |              |         |      |         |
|--------------|----|-----|-------|-------|--------------|---------|------|---------|
| 0            | T1 | E01 | 0     | 0     | kleiner LLOQ | #VALUE! | 1    | #VALUE! |
| 0            | T1 | E02 | 0     | 0     | kleiner LLOQ | #VALUE! | 1    | #VALUE! |
| 0            | T1 | E03 | 0     | 0     | kleiner LLOQ | #VALUE! | 1    | #VALUE! |
| 0            | T1 | E04 | 0     | 0     | kleiner LLOQ | #VALUE! | 1    | #VALUE! |
| 0            | T1 | E05 | 0     | 0     | kleiner LLOQ | #VALUE! | 1    | #VALUE! |
| 0            | T1 | E06 | 0     | 0     | kleiner LLOQ | #VALUE! | 1    | #VALUE! |
| 0            | T1 | E07 | 0     | 0     | kleiner LLOQ | #VALUE! | 1    | #VALUE! |
| 0            | T1 | E08 | 0     | 0     | kleiner LLOQ | #VALUE! | 1    | #VALUE! |
| 0            | T1 | E09 | 0     | 0     | kleiner LLOQ | #VALUE! | 1    | #VALUE! |
| 0            | T1 | E10 | 0     | 0     | kleiner LLOQ | #VALUE! | 1    | #VALUE! |
| 0            | T1 | E11 | 0     | 0     | kleiner LLOQ | #VALUE! | 1    | #VALUE! |
| 0            | T1 | E12 | 0     | 0     | kleiner LLOQ | #VALUE! | 1    | #VALUE! |
| 0            | T1 | F01 | 0     | 0     | kleiner LLOQ | #VALUE! | 1    | #VALUE! |
| 0            | T1 | F02 | 0     | 0     | kleiner LLOQ | #VALUE! | 1    | #VALUE! |
| 0            | T1 | F03 | 0     | 0     | kleiner LLOQ | #VALUE! | 1    | #VALUE! |
| 0            | T1 | F04 | 0     | 0     | kleiner LLOQ | #VALUE! | 1    | #VALUE! |
| 0            | T1 | F05 | 0     | 0     | kleiner LLOQ | #VALUE! | 1    | #VALUE! |
| 0            | T1 | F06 | 0     | 0     | kleiner LLOQ | #VALUE! | 1    | #VALUE! |
| 0            | T1 | F07 | 0     | 0     | kleiner LLOQ | #VALUE! | 1    | #VALUE! |
| 0            | T1 | F08 | 0     | 0     | kleiner LLOQ | #VALUE! | 1    | #VALUE! |
| 0            | T1 | F09 | 0     | 0     | kleiner LLOQ | #VALUE! | 1    | #VALUE! |
| 0            | T1 | F10 | 0     | 0     | kleiner LLOQ | #VALUE! | 1    | #VALUE! |
| 0            | T1 | F11 | 0     | 0     | kleiner LLOQ | #VALUE! | 1    | #VALUE! |
| 0            | T1 | F12 | 0     | 0     | kleiner LLOQ | #VALUE! | 1    | #VALUE! |
| 0            | T1 | G01 | 0     | 0     | kleiner LLOQ | #VALUE! | 1    | #VALUE! |
| 0            | T1 | G02 | 0     | 0     | kleiner LLOQ | #VALUE! | 1    | #VALUE! |
| T1HS11WH     | T1 | G03 | 0.998 | 0.947 | 0.947        | 0.045   | 81   | 3.671   |
| T1HS11WH     | T1 | G04 | 0     | 0     | kleiner LLOQ | #VALUE! | 1    | #VALUE! |
| 0            | T1 | G05 | 0     | 0     | kleiner LLOQ | #VALUE! | 1    | #VALUE! |
| 0            | T1 | G06 | 0     | 0     | kleiner LLOQ | #VALUE! | 1    | #VALUE! |
| Blank PEG    | T1 | G07 | 0     | 0     | kleiner LLOQ | #VALUE! | 2.75 | #VALUE! |
| Blank PEG    | T1 | G08 | 0     | 0     | kleiner LLOQ | #VALUE! | 2.75 | #VALUE! |
| Blank PEG    | T1 | G09 | 0     | 0     | kleiner LLOQ | #VALUE! | 2.75 | #VALUE! |
| Blank PEG    | T1 | G10 | 0     | 0     | kleiner LLOQ | #VALUE! | 2.75 | #VALUE! |
| Blank PEG    | T1 | G11 | 0     | 0     | kleiner LLOQ | #VALUE! | 2.75 | #VALUE! |
| Blank PEG    | T1 | G12 | 0     | 0     | kleiner LLOQ | #VALUE! | 2.75 | #VALUE! |
| 0            | T1 | H01 | 0     | 0     | kleiner LLOQ | #VALUE! | 1    | #VALUE! |
| 0            | T1 | H02 | 0     | 0     | kleiner LLOQ | #VALUE! | 1    | #VALUE! |
| 0            | T1 | H03 | 0     | 0     | kleiner LLOQ | #VALUE! | 1    | #VALUE! |
| 0            | T1 | H04 | 0     | 0     | kleiner LLOQ | #VALUE! | 1    | #VALUE! |
| 0            | T1 | H05 | 0     | 0     | kleiner LLOQ | #VALUE! | 1    | #VALUE! |
| 0            | T1 | H06 | 0     | 0     | kleiner LLOQ | #VALUE! | 1    | #VALUE! |
| Blank no Peg | T1 | H07 | 0     | 0     | kleiner LLOQ | #VALUE! | 2.75 | #VALUE! |
| Blank no Peg | T1 | H08 | 0     | 0     | kleiner LLOQ | #VALUE! | 2.75 | #VALUE! |
| Blank no Peg | T1 | H09 | 0     | 0     | kleiner LLOQ | #VALUE! | 2.75 | #VALUE! |
| Blank no Peg | T1 | H10 | 0     | 0     | kleiner LLOQ | #VALUE! | 2.75 | #VALUE! |
| Blank no Peg | T1 | H11 | 0     | 0     | kleiner LLOQ | #VALUE! | 2.75 | #VALUE! |
| Blank no Peg | T1 | H12 | 0     | 0     | kleiner LLOQ | #VALUE! | 2.75 | #VALUE! |
| 0            | T2 | A01 | 0     | 0     | kleiner LLOQ | #VALUE! | 1    | #VALUE! |
| 0            | T2 | A02 | 0     | 0     | kleiner LLOQ | #VALUE! | 1    | #VALUE! |
| 0            | T2 | A03 | 0     | 0     | kleiner LLOQ | #VALUE! | 1    | #VALUE! |
| 0            | T2 | A04 | 0     | 0     | kleiner LLOQ | #VALUE! | 1    | #VALUE! |
| T2HN1        | T2 | A05 | 0     | 0     | kleiner LLOQ | #VALUE! | 1    | #VALUE! |
| T2HN1        | T2 | A06 | 0     | 0     | kleiner LLOQ | #VALUE! | 1    | #VALUE! |
| 0            | T2 | A07 | 0     | 0     | kleiner LLOQ | #VALUE! | 1    | #VALUE! |
| 0            | T2 | A08 | 0     | 0     | kleiner LLOQ | #VALUE! | 1    | #VALUE! |
| T2HN3        | T2 | A09 | 1.078 | 1.027 | 1.027        | 0.059   | 22   | 1.289   |
| T2HN3        | T2 | A10 | 1.053 | 1.003 | 1.003        | 0.054   | 22   | 1.198   |
| 0            | T2 | A11 | 0     | 0     | kleiner LLOQ | #VALUE! | 1    | #VALUE! |
| 0            | T2 | A12 | 0     | 0     | kleiner LLOQ | #VALUE! | 1    | #VALUE! |
| 0            | T2 | B01 | 0     | 0     | kleiner LLOQ | #VALUE! | 1    | #VALUE! |
| 0            | T2 | B02 | 0     | 0     | kleiner LLOQ | #VALUE! | 1    | #VALUE! |
| 0            | T2 | B03 | 0     | 0     | kleiner LLOQ | #VALUE! | 1    | #VALUE! |
| 0            | T2 | B04 | 0     | 0     | kleiner LLOQ | #VALUE! | 1    | #VALUE! |
| 0            | T2 | B05 | 0     | 0     | kleiner LLOQ | #VALUE! | 1    | #VALUE! |
| 0            | T2 | B06 | 0     | 0     | kleiner LLOQ | #VALUE! | 1    | #VALUE! |
| T2HS12       | T2 | B07 | 1.246 | 1.195 | 1.195        | 0.086   | 22   | 1.897   |
| T2HS12       | T2 | B08 | 1.362 | 1.311 | 1.311        | 0.105   | 22   | 2.320   |
| T2HS13       | T2 | B09 | 1.168 | 1.117 | 1.117        | 0.073   | 22   | 1.616   |
| T2HS13       | T2 | B10 | 1.384 | 1.333 | 1.333        | 0.109   | 22   | 2.399   |
| 0            | T2 | B11 | 0     | 0     | kleiner LLOQ | #VALUE! | 1    | #VALUE! |
| 0            | T2 | B12 | 0     | 0     | kleiner LLOQ | #VALUE! | 1    | #VALUE! |

Plate: T2

|   |   |   |   |   |       |       |       |       |       |       |       |       |
|---|---|---|---|---|-------|-------|-------|-------|-------|-------|-------|-------|
|   | 1 | 2 | 3 | 4 | 5     | 6     | 7     | 8     | 9     | 10    | 11    | 12    |
| A |   |   |   |   |       |       |       |       |       | 1.078 | 1.053 |       |
| B |   |   |   |   |       |       | 1.246 | 1.362 | 1.168 | 1.384 |       |       |
| C |   |   |   |   | 0.958 | 0.995 |       |       |       |       |       |       |
| D |   |   |   |   |       |       |       |       |       |       |       |       |
| E |   |   |   |   |       |       |       |       |       |       |       |       |
| F |   |   |   |   |       |       |       |       |       |       |       |       |
| G |   |   |   |   |       |       | 0.056 | 0.055 | 0.055 | 0.055 | 0.056 | 0.063 |
| H |   |   |   |   |       |       | 0.052 | 0.053 | 0.053 | 0.053 | 0.052 | 0.052 |

Plattenbelegung

|   |   |   |   |   |        |        |        |        |        |        |        |    |
|---|---|---|---|---|--------|--------|--------|--------|--------|--------|--------|----|
|   | 1 | 2 | 3 | 4 | 5      | 6      | 7      | 8      | 9      | 10     | 11     | 12 |
| A |   |   |   |   | T2HN1  | T2HN1  |        |        |        | T2HN3  | T2HN3  |    |
| B |   |   |   |   |        |        | T2HS12 | T2HS12 | T2HS13 | T2HS13 |        |    |
| C |   |   |   |   | T2HS21 | T2HS21 |        |        |        | T2HS23 | T2HS23 |    |
| D |   |   |   |   |        |        |        |        |        |        |        |    |



|              |    |     |       |       |              |         |      |         |   |  |  |  |  |  |  |  |  |  |  |  |
|--------------|----|-----|-------|-------|--------------|---------|------|---------|---|--|--|--|--|--|--|--|--|--|--|--|
| 0            | T2 | C01 | 0     | 0     | kleiner LLOQ | #VALUE! | 1    | #VALUE! | E |  |  |  |  |  |  |  |  |  |  |  |
| 0            | T2 | C02 | 0     | 0     | kleiner LLOQ | #VALUE! | 1    | #VALUE! | F |  |  |  |  |  |  |  |  |  |  |  |
| 0            | T2 | C03 | 0     | 0     | kleiner LLOQ | #VALUE! | 1    | #VALUE! | G |  |  |  |  |  |  |  |  |  |  |  |
| 0            | T2 | C04 | 0     | 0     | kleiner LLOQ | #VALUE! | 1    | #VALUE! | H |  |  |  |  |  |  |  |  |  |  |  |
| T2HS21       | T2 | C05 | 0.958 | 0.907 | 0.907        | 0.039   | 22   | 0.852   |   |  |  |  |  |  |  |  |  |  |  |  |
| T2HS21       | T2 | C06 | 0.995 | 0.944 | 0.944        | 0.045   | 22   | 0.984   |   |  |  |  |  |  |  |  |  |  |  |  |
| 0            | T2 | C07 | 0     | 0     | kleiner LLOQ | #VALUE! | 1    | #VALUE! |   |  |  |  |  |  |  |  |  |  |  |  |
| 0            | T2 | C08 | 0     | 0     | kleiner LLOQ | #VALUE! | 1    | #VALUE! |   |  |  |  |  |  |  |  |  |  |  |  |
| T2HS23       | T2 | C09 | 0     | 0     | kleiner LLOQ | #VALUE! | 1    | #VALUE! |   |  |  |  |  |  |  |  |  |  |  |  |
| T2HS23       | T2 | C10 | 0     | 0     | kleiner LLOQ | #VALUE! | 1    | #VALUE! |   |  |  |  |  |  |  |  |  |  |  |  |
| 0            | T2 | C11 | 0     | 0     | kleiner LLOQ | #VALUE! | 1    | #VALUE! |   |  |  |  |  |  |  |  |  |  |  |  |
| 0            | T2 | C12 | 0     | 0     | kleiner LLOQ | #VALUE! | 1    | #VALUE! |   |  |  |  |  |  |  |  |  |  |  |  |
| 0            | T2 | D01 | 0     | 0     | kleiner LLOQ | #VALUE! | 1    | #VALUE! |   |  |  |  |  |  |  |  |  |  |  |  |
| 0            | T2 | D02 | 0     | 0     | kleiner LLOQ | #VALUE! | 1    | #VALUE! |   |  |  |  |  |  |  |  |  |  |  |  |
| 0            | T2 | D03 | 0     | 0     | kleiner LLOQ | #VALUE! | 1    | #VALUE! |   |  |  |  |  |  |  |  |  |  |  |  |
| 0            | T2 | D04 | 0     | 0     | kleiner LLOQ | #VALUE! | 1    | #VALUE! |   |  |  |  |  |  |  |  |  |  |  |  |
| 0            | T2 | D05 | 0     | 0     | kleiner LLOQ | #VALUE! | 1    | #VALUE! |   |  |  |  |  |  |  |  |  |  |  |  |
| 0            | T2 | D06 | 0     | 0     | kleiner LLOQ | #VALUE! | 1    | #VALUE! |   |  |  |  |  |  |  |  |  |  |  |  |
| 0            | T2 | D07 | 0     | 0     | kleiner LLOQ | #VALUE! | 1    | #VALUE! |   |  |  |  |  |  |  |  |  |  |  |  |
| 0            | T2 | D08 | 0     | 0     | kleiner LLOQ | #VALUE! | 1    | #VALUE! |   |  |  |  |  |  |  |  |  |  |  |  |
| 0            | T2 | D09 | 0     | 0     | kleiner LLOQ | #VALUE! | 1    | #VALUE! |   |  |  |  |  |  |  |  |  |  |  |  |
| 0            | T2 | D10 | 0     | 0     | kleiner LLOQ | #VALUE! | 1    | #VALUE! |   |  |  |  |  |  |  |  |  |  |  |  |
| 0            | T2 | D11 | 0     | 0     | kleiner LLOQ | #VALUE! | 1    | #VALUE! |   |  |  |  |  |  |  |  |  |  |  |  |
| 0            | T2 | D12 | 0     | 0     | kleiner LLOQ | #VALUE! | 1    | #VALUE! |   |  |  |  |  |  |  |  |  |  |  |  |
| 0            | T2 | E01 | 0     | 0     | kleiner LLOQ | #VALUE! | 1    | #VALUE! |   |  |  |  |  |  |  |  |  |  |  |  |
| 0            | T2 | E02 | 0     | 0     | kleiner LLOQ | #VALUE! | 1    | #VALUE! |   |  |  |  |  |  |  |  |  |  |  |  |
| 0            | T2 | E03 | 0     | 0     | kleiner LLOQ | #VALUE! | 1    | #VALUE! |   |  |  |  |  |  |  |  |  |  |  |  |
| 0            | T2 | E04 | 0     | 0     | kleiner LLOQ | #VALUE! | 1    | #VALUE! |   |  |  |  |  |  |  |  |  |  |  |  |
| 0            | T2 | E05 | 0     | 0     | kleiner LLOQ | #VALUE! | 1    | #VALUE! |   |  |  |  |  |  |  |  |  |  |  |  |
| 0            | T2 | E06 | 0     | 0     | kleiner LLOQ | #VALUE! | 1    | #VALUE! |   |  |  |  |  |  |  |  |  |  |  |  |
| 0            | T2 | E07 | 0     | 0     | kleiner LLOQ | #VALUE! | 1    | #VALUE! |   |  |  |  |  |  |  |  |  |  |  |  |
| 0            | T2 | E08 | 0     | 0     | kleiner LLOQ | #VALUE! | 1    | #VALUE! |   |  |  |  |  |  |  |  |  |  |  |  |
| 0            | T2 | E09 | 0     | 0     | kleiner LLOQ | #VALUE! | 1    | #VALUE! |   |  |  |  |  |  |  |  |  |  |  |  |
| 0            | T2 | E10 | 0     | 0     | kleiner LLOQ | #VALUE! | 1    | #VALUE! |   |  |  |  |  |  |  |  |  |  |  |  |
| 0            | T2 | E11 | 0     | 0     | kleiner LLOQ | #VALUE! | 1    | #VALUE! |   |  |  |  |  |  |  |  |  |  |  |  |
| 0            | T2 | E12 | 0     | 0     | kleiner LLOQ | #VALUE! | 1    | #VALUE! |   |  |  |  |  |  |  |  |  |  |  |  |
| 0            | T2 | F01 | 0     | 0     | kleiner LLOQ | #VALUE! | 1    | #VALUE! |   |  |  |  |  |  |  |  |  |  |  |  |
| 0            | T2 | F02 | 0     | 0     | kleiner LLOQ | #VALUE! | 1    | #VALUE! |   |  |  |  |  |  |  |  |  |  |  |  |
| 0            | T2 | F03 | 0     | 0     | kleiner LLOQ | #VALUE! | 1    | #VALUE! |   |  |  |  |  |  |  |  |  |  |  |  |
| 0            | T2 | F04 | 0     | 0     | kleiner LLOQ | #VALUE! | 1    | #VALUE! |   |  |  |  |  |  |  |  |  |  |  |  |
| 0            | T2 | F05 | 0     | 0     | kleiner LLOQ | #VALUE! | 1    | #VALUE! |   |  |  |  |  |  |  |  |  |  |  |  |
| 0            | T2 | F06 | 0     | 0     | kleiner LLOQ | #VALUE! | 1    | #VALUE! |   |  |  |  |  |  |  |  |  |  |  |  |
| 0            | T2 | F07 | 0     | 0     | kleiner LLOQ | #VALUE! | 1    | #VALUE! |   |  |  |  |  |  |  |  |  |  |  |  |
| 0            | T2 | F08 | 0     | 0     | kleiner LLOQ | #VALUE! | 1    | #VALUE! |   |  |  |  |  |  |  |  |  |  |  |  |
| 0            | T2 | F09 | 0     | 0     | kleiner LLOQ | #VALUE! | 1    | #VALUE! |   |  |  |  |  |  |  |  |  |  |  |  |
| 0            | T2 | F10 | 0     | 0     | kleiner LLOQ | #VALUE! | 1    | #VALUE! |   |  |  |  |  |  |  |  |  |  |  |  |
| 0            | T2 | F11 | 0     | 0     | kleiner LLOQ | #VALUE! | 1    | #VALUE! |   |  |  |  |  |  |  |  |  |  |  |  |
| 0            | T2 | F12 | 0     | 0     | kleiner LLOQ | #VALUE! | 1    | #VALUE! |   |  |  |  |  |  |  |  |  |  |  |  |
| 0            | T2 | G01 | 0     | 0     | kleiner LLOQ | #VALUE! | 1    | #VALUE! |   |  |  |  |  |  |  |  |  |  |  |  |
| 0            | T2 | G02 | 0     | 0     | kleiner LLOQ | #VALUE! | 1    | #VALUE! |   |  |  |  |  |  |  |  |  |  |  |  |
| 0            | T2 | G03 | 0     | 0     | kleiner LLOQ | #VALUE! | 1    | #VALUE! |   |  |  |  |  |  |  |  |  |  |  |  |
| 0            | T2 | G04 | 0     | 0     | kleiner LLOQ | #VALUE! | 1    | #VALUE! |   |  |  |  |  |  |  |  |  |  |  |  |
| 0            | T2 | G05 | 0     | 0     | kleiner LLOQ | #VALUE! | 1    | #VALUE! |   |  |  |  |  |  |  |  |  |  |  |  |
| 0            | T2 | G06 | 0     | 0     | kleiner LLOQ | #VALUE! | 1    | #VALUE! |   |  |  |  |  |  |  |  |  |  |  |  |
| Blank no PEG | T2 | G07 | 0     | 0     | kleiner LLOQ | #VALUE! | 2.75 | #VALUE! |   |  |  |  |  |  |  |  |  |  |  |  |
| Blank no PEG | T2 | G08 | 0     | 0     | kleiner LLOQ | #VALUE! | 2.75 | #VALUE! |   |  |  |  |  |  |  |  |  |  |  |  |
| Blank no PEG | T2 | G09 | 0     | 0     | kleiner LLOQ | #VALUE! | 2.75 | #VALUE! |   |  |  |  |  |  |  |  |  |  |  |  |
| Blank no PEG | T2 | G10 | 0     | 0     | kleiner LLOQ | #VALUE! | 2.75 | #VALUE! |   |  |  |  |  |  |  |  |  |  |  |  |
| Blank no PEG | T2 | G11 | 0     | 0     | kleiner LLOQ | #VALUE! | 2.75 | #VALUE! |   |  |  |  |  |  |  |  |  |  |  |  |
| Blank no PEG | T2 | G12 | 0     | 0     | kleiner LLOQ | #VALUE! | 2.75 | #VALUE! |   |  |  |  |  |  |  |  |  |  |  |  |
| 0            | T2 | H01 | 0     | 0     | kleiner LLOQ | #VALUE! | 1    | #VALUE! |   |  |  |  |  |  |  |  |  |  |  |  |
| 0            | T2 | H02 | 0     | 0     | kleiner LLOQ | #VALUE! | 1    | #VALUE! |   |  |  |  |  |  |  |  |  |  |  |  |
| 0            | T2 | H03 | 0     | 0     | kleiner LLOQ | #VALUE! | 1    | #VALUE! |   |  |  |  |  |  |  |  |  |  |  |  |
| 0            | T2 | H04 | 0     | 0     | kleiner LLOQ | #VALUE! | 1    | #VALUE! |   |  |  |  |  |  |  |  |  |  |  |  |
| 0            | T2 | H05 | 0     | 0     | kleiner LLOQ | #VALUE! | 1    | #VALUE! |   |  |  |  |  |  |  |  |  |  |  |  |
| 0            | T2 | H06 | 0     | 0     | kleiner LLOQ | #VALUE! | 1    | #VALUE! |   |  |  |  |  |  |  |  |  |  |  |  |
| Blank no PEG | T2 | H07 | 0     | 0     | kleiner LLOQ | #VALUE! | 2.75 | #VALUE! |   |  |  |  |  |  |  |  |  |  |  |  |
| Blank no PEG | T2 | H08 | 0     | 0     | kleiner LLOQ | #VALUE! | 2.75 | #VALUE! |   |  |  |  |  |  |  |  |  |  |  |  |
| Blank no PEG | T2 | H09 | 0     | 0     | kleiner LLOQ | #VALUE! | 2.75 | #VALUE! |   |  |  |  |  |  |  |  |  |  |  |  |
| Blank no PEG | T2 | H10 | 0     | 0     | kleiner LLOQ | #VALUE! | 2.75 | #VALUE! |   |  |  |  |  |  |  |  |  |  |  |  |
| Blank no PEG | T2 | H11 | 0     | 0     | kleiner LLOQ | #VALUE! | 2.75 | #VALUE! |   |  |  |  |  |  |  |  |  |  |  |  |
| Blank no PEG | T2 | H12 | 0     | 0     | kleiner LLOQ | #VALUE! | 2.75 | #VALUE! |   |  |  |  |  |  |  |  |  |  |  |  |

Comment:

dil8\*2,75=dil.22

Date Operator Date Control

|        |    |     |       |       |              |         |       |         |
|--------|----|-----|-------|-------|--------------|---------|-------|---------|
| 0      | T3 | A01 | 0     | 0     | kleiner LLOQ | #VALUE! | 1     | #VALUE! |
| 0      | T3 | A02 | 0     | 0     | kleiner LLOQ | #VALUE! | 1     | #VALUE! |
| 0      | T3 | A03 | 0     | 0     | kleiner LLOQ | #VALUE! | 1     | #VALUE! |
| 0      | T3 | A04 | 0     | 0     | kleiner LLOQ | #VALUE! | 1     | #VALUE! |
| 0      | T3 | A05 | 0     | 0     | kleiner LLOQ | #VALUE! | 1     | #VALUE! |
| 0      | T3 | A06 | 0     | 0     | kleiner LLOQ | #VALUE! | 1     | #VALUE! |
| 0      | T3 | A07 | 0     | 0     | kleiner LLOQ | #VALUE! | 1     | #VALUE! |
| 0      | T3 | A08 | 0     | 0     | kleiner LLOQ | #VALUE! | 1     | #VALUE! |
| 0      | T3 | A09 | 0     | 0     | kleiner LLOQ | #VALUE! | 1     | #VALUE! |
| 0      | T3 | A10 | 0     | 0     | kleiner LLOQ | #VALUE! | 1     | #VALUE! |
| 0      | T3 | A11 | 0     | 0     | kleiner LLOQ | #VALUE! | 1     | #VALUE! |
| 0      | T3 | A12 | 0     | 0     | kleiner LLOQ | #VALUE! | 1     | #VALUE! |
| 0      | T3 | B01 | 0     | 0     | kleiner LLOQ | #VALUE! | 1     | #VALUE! |
| 0      | T3 | B02 | 0     | 0     | kleiner LLOQ | #VALUE! | 1     | #VALUE! |
| 0      | T3 | B03 | 0     | 0     | kleiner LLOQ | #VALUE! | 1     | #VALUE! |
| 0      | T3 | B04 | 0     | 0     | kleiner LLOQ | #VALUE! | 1     | #VALUE! |
| T3HS11 | T3 | B05 | 1.359 | 1.308 | 1.308        | 0.105   | 24.75 | 2.599   |
| T3HS11 | T3 | B06 | 1.418 | 1.367 | 1.367        | 0.115   | 24.75 | 2.839   |
| T3HS12 | T3 | B07 | 1.251 | 1.200 | 1.200        | 0.087   | 24.75 | 2.156   |
| T3HS12 | T3 | B08 | 1.253 | 1.202 | 1.202        | 0.087   | 24.75 | 2.165   |
| T3HS13 | T3 | B09 | 1.184 | 1.133 | 1.133        | 0.076   | 24.75 | 1.881   |
| T3HS13 | T3 | B10 | 1.089 | 1.038 | 1.038        | 0.060   | 24.75 | 1.491   |
| 0      | T3 | B11 | 0     | 0     | kleiner LLOQ | #VALUE! | 1     | #VALUE! |
| 0      | T3 | B12 | 0     | 0     | kleiner LLOQ | #VALUE! | 1     | #VALUE! |
| 0      | T3 | C01 | 0     | 0     | kleiner LLOQ | #VALUE! | 1     | #VALUE! |
| 0      | T3 | C02 | 0     | 0     | kleiner LLOQ | #VALUE! | 1     | #VALUE! |
| 0      | T3 | C03 | 0     | 0     | kleiner LLOQ | #VALUE! | 1     | #VALUE! |
| 0      | T3 | C04 | 0     | 0     | kleiner LLOQ | #VALUE! | 1     | #VALUE! |
| 0      | T3 | C05 | 0     | 0     | kleiner LLOQ | #VALUE! | 1     | #VALUE! |
| 0      | T3 | C06 | 0     | 0     | kleiner LLOQ | #VALUE! | 1     | #VALUE! |
| 0      | T3 | C07 | 0     | 0     | kleiner LLOQ | #VALUE! | 1     | #VALUE! |
| 0      | T3 | C08 | 0     | 0     | kleiner LLOQ | #VALUE! | 1     | #VALUE! |
| 0      | T3 | C09 | 0     | 0     | kleiner LLOQ | #VALUE! | 1     | #VALUE! |
| 0      | T3 | C10 | 0     | 0     | kleiner LLOQ | #VALUE! | 1     | #VALUE! |
| 0      | T3 | C11 | 0     | 0     | kleiner LLOQ | #VALUE! | 1     | #VALUE! |
| 0      | T3 | C12 | 0     | 0     | kleiner LLOQ | #VALUE! | 1     | #VALUE! |
| 0      | T3 | D01 | 0     | 0     | kleiner LLOQ | #VALUE! | 1     | #VALUE! |
| 0      | T3 | D02 | 0     | 0     | kleiner LLOQ | #VALUE! | 1     | #VALUE! |
| 0      | T3 | D03 | 0     | 0     | kleiner LLOQ | #VALUE! | 1     | #VALUE! |
| 0      | T3 | D04 | 0     | 0     | kleiner LLOQ | #VALUE! | 1     | #VALUE! |
| 0      | T3 | D05 | 0     | 0     | kleiner LLOQ | #VALUE! | 1     | #VALUE! |
| 0      | T3 | D06 | 0     | 0     | kleiner LLOQ | #VALUE! | 1     | #VALUE! |
| 0      | T3 | D07 | 0     | 0     | kleiner LLOQ | #VALUE! | 1     | #VALUE! |
| 0      | T3 | D08 | 0     | 0     | kleiner LLOQ | #VALUE! | 1     | #VALUE! |
| 0      | T3 | D09 | 0     | 0     | kleiner LLOQ | #VALUE! | 1     | #VALUE! |
| 0      | T3 | D10 | 0     | 0     | kleiner LLOQ | #VALUE! | 1     | #VALUE! |
| 0      | T3 | D11 | 0     | 0     | kleiner LLOQ | #VALUE! | 1     | #VALUE! |
| 0      | T3 | D12 | 0     | 0     | kleiner LLOQ | #VALUE! | 1     | #VALUE! |
| 0      | T3 | E01 | 0     | 0     | kleiner LLOQ | #VALUE! | 1     | #VALUE! |
| 0      | T3 | E02 | 0     | 0     | kleiner LLOQ | #VALUE! | 1     | #VALUE! |
| 0      | T3 | E03 | 0     | 0     | kleiner LLOQ | #VALUE! | 1     | #VALUE! |
| 0      | T3 | E04 | 0     | 0     | kleiner LLOQ | #VALUE! | 1     | #VALUE! |
| 0      | T3 | E05 | 0     | 0     | kleiner LLOQ | #VALUE! | 1     | #VALUE! |
| 0      | T3 | E06 | 0     | 0     | kleiner LLOQ | #VALUE! | 1     | #VALUE! |
| 0      | T3 | E07 | 0     | 0     | kleiner LLOQ | #VALUE! | 1     | #VALUE! |
| 0      | T3 | E08 | 0     | 0     | kleiner LLOQ | #VALUE! | 1     | #VALUE! |
| 0      | T3 | E09 | 0     | 0     | kleiner LLOQ | #VALUE! | 1     | #VALUE! |

Plate: T3

|   |   |   |   |   |       |       |       |       |       |       |       |       |       |
|---|---|---|---|---|-------|-------|-------|-------|-------|-------|-------|-------|-------|
|   | 1 | 2 | 3 | 4 | 5     | 6     | 7     | 8     | 9     | 10    | 11    | 12    |       |
| A |   |   |   |   |       |       |       |       |       |       |       |       |       |
| B |   |   |   |   | 1.359 | 1.418 | 1.251 | 1.253 | 1.184 | 1.089 |       |       |       |
| C |   |   |   |   |       |       |       |       |       |       |       |       |       |
| D |   |   |   |   |       |       |       |       |       |       |       |       |       |
| E |   |   |   |   |       |       |       |       |       |       |       |       |       |
| F |   |   |   |   |       |       |       |       |       |       |       |       |       |
| G |   |   |   |   |       |       |       | 0.052 | 0.048 | 0.052 | 0.052 | 0.047 | 0.046 |
| H |   |   |   |   |       |       |       | 0.051 | 0.060 | 0.059 | 0.054 | 0.055 | 0.055 |

Plattenbelegung

|   |   |   |   |   |   |   |   |   |   |    |    |    |
|---|---|---|---|---|---|---|---|---|---|----|----|----|
|   | 1 | 2 | 3 | 4 | 5 | 6 | 7 | 8 | 9 | 10 | 11 | 12 |
| A |   |   |   |   |   |   |   |   |   |    |    |    |
| B |   |   |   |   |   |   |   |   |   |    |    |    |
| C |   |   |   |   |   |   |   |   |   |    |    |    |
| D |   |   |   |   |   |   |   |   |   |    |    |    |
| E |   |   |   |   |   |   |   |   |   |    |    |    |
| F |   |   |   |   |   |   |   |   |   |    |    |    |
| G |   |   |   |   |   |   |   |   |   |    |    |    |
| H |   |   |   |   |   |   |   |   |   |    |    |    |

dil9\*2.75=dil24.75

Comment:

Date Operator

Date Control

|              |    |     |   |   |              |         |      |         |
|--------------|----|-----|---|---|--------------|---------|------|---------|
| 0            | T3 | E10 | 0 | 0 | kleiner LLOQ | #VALUE! | 1    | #VALUE! |
| 0            | T3 | E11 | 0 | 0 | kleiner LLOQ | #VALUE! | 1    | #VALUE! |
| 0            | T3 | E12 | 0 | 0 | kleiner LLOQ | #VALUE! | 1    | #VALUE! |
| 0            | T3 | F01 | 0 | 0 | kleiner LLOQ | #VALUE! | 1    | #VALUE! |
| 0            | T3 | F02 | 0 | 0 | kleiner LLOQ | #VALUE! | 1    | #VALUE! |
| 0            | T3 | F03 | 0 | 0 | kleiner LLOQ | #VALUE! | 1    | #VALUE! |
| 0            | T3 | F04 | 0 | 0 | kleiner LLOQ | #VALUE! | 1    | #VALUE! |
| 0            | T3 | F05 | 0 | 0 | kleiner LLOQ | #VALUE! | 1    | #VALUE! |
| 0            | T3 | F06 | 0 | 0 | kleiner LLOQ | #VALUE! | 1    | #VALUE! |
| 0            | T3 | F07 | 0 | 0 | kleiner LLOQ | #VALUE! | 1    | #VALUE! |
| 0            | T3 | F08 | 0 | 0 | kleiner LLOQ | #VALUE! | 1    | #VALUE! |
| 0            | T3 | F09 | 0 | 0 | kleiner LLOQ | #VALUE! | 1    | #VALUE! |
| 0            | T3 | F10 | 0 | 0 | kleiner LLOQ | #VALUE! | 1    | #VALUE! |
| 0            | T3 | F11 | 0 | 0 | kleiner LLOQ | #VALUE! | 1    | #VALUE! |
| 0            | T3 | F12 | 0 | 0 | kleiner LLOQ | #VALUE! | 1    | #VALUE! |
| 0            | T3 | G01 | 0 | 0 | kleiner LLOQ | #VALUE! | 1    | #VALUE! |
| 0            | T3 | G02 | 0 | 0 | kleiner LLOQ | #VALUE! | 1    | #VALUE! |
| 0            | T3 | G03 | 0 | 0 | kleiner LLOQ | #VALUE! | 1    | #VALUE! |
| 0            | T3 | G04 | 0 | 0 | kleiner LLOQ | #VALUE! | 1    | #VALUE! |
| 0            | T3 | G05 | 0 | 0 | kleiner LLOQ | #VALUE! | 1    | #VALUE! |
| 0            | T3 | G06 | 0 | 0 | kleiner LLOQ | #VALUE! | 1    | #VALUE! |
| Blank PEG    | T3 | G07 | 0 | 0 | kleiner LLOQ | #VALUE! | 2.75 | #VALUE! |
| Blank PEG    | T3 | G08 | 0 | 0 | kleiner LLOQ | #VALUE! | 2.75 | #VALUE! |
| Blank PEG    | T3 | G09 | 0 | 0 | kleiner LLOQ | #VALUE! | 2.75 | #VALUE! |
| Blank PEG    | T3 | G10 | 0 | 0 | kleiner LLOQ | #VALUE! | 2.75 | #VALUE! |
| Blank PEG    | T3 | G11 | 0 | 0 | kleiner LLOQ | #VALUE! | 2.75 | #VALUE! |
| Blank PEG    | T3 | G12 | 0 | 0 | kleiner LLOQ | #VALUE! | 2.75 | #VALUE! |
| 0            | T3 | H01 | 0 | 0 | kleiner LLOQ | #VALUE! | 1    | #VALUE! |
| 0            | T3 | H02 | 0 | 0 | kleiner LLOQ | #VALUE! | 1    | #VALUE! |
| 0            | T3 | H03 | 0 | 0 | kleiner LLOQ | #VALUE! | 1    | #VALUE! |
| 0            | T3 | H04 | 0 | 0 | kleiner LLOQ | #VALUE! | 1    | #VALUE! |
| 0            | T3 | H05 | 0 | 0 | kleiner LLOQ | #VALUE! | 1    | #VALUE! |
| 0            | T3 | H06 | 0 | 0 | kleiner LLOQ | #VALUE! | 1    | #VALUE! |
| Blank no PEG | T3 | H07 | 0 | 0 | kleiner LLOQ | #VALUE! | 2.75 | #VALUE! |
| Blank no PEG | T3 | H08 | 0 | 0 | kleiner LLOQ | #VALUE! | 2.75 | #VALUE! |
| Blank no PEG | T3 | H09 | 0 | 0 | kleiner LLOQ | #VALUE! | 2.75 | #VALUE! |
| Blank no PEG | T3 | H10 | 0 | 0 | kleiner LLOQ | #VALUE! | 2.75 | #VALUE! |
| Blank no PEG | T3 | H11 | 0 | 0 | kleiner LLOQ | #VALUE! | 2.75 | #VALUE! |
| Blank no PEG | T3 | H12 | 0 | 0 | kleiner LLOQ | #VALUE! | 2.75 | #VALUE! |

|       |       |       |       |       |       |       |       |       |       |       |       |
|-------|-------|-------|-------|-------|-------|-------|-------|-------|-------|-------|-------|
| 1.447 | 1.739 |       | 1.170 |       |       |       |       |       | 0.667 | 0.440 | 0.043 |
| 1.447 | 1.332 |       | 1.392 | 0.137 | 0.146 | 0.130 | 0.138 | 0.109 | 0.729 | 0.478 | 0.042 |
| 1.391 | 1.281 |       | 1.311 | 0.204 | 0.184 | 0.184 | 0.198 | 0.201 | 0.743 | 0.474 | 0.043 |
| 0.961 | 0.835 |       | 1.405 | 0.336 | 0.347 | 0.375 | 0.387 | 0.300 | 0.824 | 0.483 | 0.044 |
| 0.445 | 0.441 |       | 1.280 | 1.085 | 1.086 | 1.218 | 1.004 | 0.873 | 0.704 | 0.457 | 0.041 |
| 0.355 | 0.315 |       | 1.332 | 1.768 | 1.925 | 1.753 | 1.739 | 1.606 |       |       | 0.036 |
| 0.223 | 0.188 | 1.666 | 1.499 | 1.632 |       | 0.048 | 0.046 | 0.047 | 0.048 | 0.048 | 0.048 |
| 0.118 | 0.106 | 1.556 | 1.622 | 1.573 |       | 0.047 | 0.054 | 0.051 | 0.051 | 0.052 | 0.051 |

1

|       |       |       |       |       |       |       |       |       |       |       |       |
|-------|-------|-------|-------|-------|-------|-------|-------|-------|-------|-------|-------|
| 1.652 | 1.627 |       | 1.188 | 0.748 | 0.811 | 0.764 | 0.753 | 0.674 | 0.751 | 0.529 | 0.044 |
| 1.443 | 1.372 |       | 1.364 | 0.139 | 0.147 | 0.131 | 0.139 | 0.110 | 0.811 | 0.561 | 0.043 |
| 1.377 | 1.281 |       | 1.284 | 0.206 | 0.189 | 0.184 | 0.200 | 0.202 | 0.821 | 0.560 | 0.044 |
| 0.972 | 0.883 |       | 1.387 | 0.339 | 0.349 | 0.386 | 0.406 | 0.312 | 0.903 | 0.565 | 0.044 |
| 0.484 | 0.474 |       | 1.298 | 1.087 | 1.113 | 1.203 | 1.022 | 0.903 | 0.790 | 0.544 | 0.042 |
| 0.359 | 0.326 |       | 1.308 | 1.622 | 1.622 | 1.630 | 1.625 | 1.550 |       |       | 0.037 |
| 0.228 | 0.199 | 1.527 | 1.373 | 1.462 |       | 0.048 | 0.046 | 0.048 | 0.049 | 0.049 | 0.049 |
| 0.125 | 0.109 | 1.473 | 1.410 | 1.371 |       | 0.048 | 0.054 | 0.052 | 0.052 | 0.052 | 0.051 |

2

|       |       |       |       |       |       |       |       |       |       |       |       |
|-------|-------|-------|-------|-------|-------|-------|-------|-------|-------|-------|-------|
| 1.579 | 1.475 |       | 1.150 | 1.210 | 1.303 | 1.202 | 1.219 | 1.125 | 0.759 | 0.549 | 0.043 |
| 1.357 | 1.303 |       | 1.283 | 0.140 | 0.148 | 0.131 | 0.139 | 0.111 | 0.820 | 0.575 | 0.043 |
| 1.323 | 1.228 |       | 1.227 | 0.206 | 0.188 | 0.184 | 0.198 | 0.201 | 0.824 | 0.579 | 0.043 |
| 0.959 | 0.872 |       | 1.321 | 0.339 | 0.348 | 0.387 | 0.406 | 0.314 | 0.909 | 0.580 | 0.044 |
| 0.483 | 0.473 |       | 1.270 | 1.069 | 1.103 | 1.181 | 1.017 | 0.903 | 0.798 | 0.560 | 0.042 |
| 0.360 | 0.326 |       | 1.270 | 1.497 | 1.448 | 1.496 | 1.494 | 1.449 |       |       | 0.037 |
| 0.228 | 0.199 | 1.374 | 1.262 | 1.314 |       | 0.048 | 0.046 | 0.048 | 0.049 | 0.049 | 0.049 |
| 0.125 | 0.110 | 1.346 | 1.262 | 1.253 |       | 0.048 | 0.054 | 0.052 | 0.052 | 0.052 | 0.051 |

3

|       |       |  |  |       |       |       |       |       |       |       |       |
|-------|-------|--|--|-------|-------|-------|-------|-------|-------|-------|-------|
| 1.511 | 1.369 |  |  | 1.538 | 1.712 | 1.528 | 1.502 | 1.425 |       |       | 0.043 |
| 1.296 | 1.261 |  |  |       |       |       |       |       |       |       | 0.043 |
| 1.272 | 1.193 |  |  |       |       |       |       |       |       |       | 0.043 |
| 0.947 | 0.859 |  |  |       |       |       |       |       |       |       | 0.044 |
| 0.481 | 0.471 |  |  |       |       |       |       |       |       |       | 0.042 |
| 0.361 | 0.325 |  |  |       |       |       |       |       |       |       | 0.037 |
| 0.229 | 0.199 |  |  |       |       | 0.048 | 0.046 | 0.048 | 0.049 | 0.049 | 0.049 |
| 0.125 | 0.110 |  |  |       |       | 0.047 | 0.054 | 0.052 | 0.052 | 0.052 | 0.051 |

4

|       |       |       |       |       |       |       |       |       |       |       |       |
|-------|-------|-------|-------|-------|-------|-------|-------|-------|-------|-------|-------|
| 1.493 | 1.317 | 1.678 | 1.110 | 1.621 | 1.807 | 1.618 | 1.584 | 1.508 | 0.765 | 0.597 | 0.043 |
| 1.259 | 1.238 | 1.850 | 1.197 | 0.139 | 0.150 | 0.132 | 0.139 | 0.111 | 0.821 | 0.588 | 0.043 |
| 1.248 | 1.175 | 1.816 | 1.153 | 0.204 | 0.188 | 0.184 | 0.197 | 0.199 | 0.831 | 0.599 | 0.044 |
| 0.943 | 0.859 | 1.970 | 1.231 | 0.338 | 0.357 | 0.386 | 0.406 | 0.316 | 0.916 | 0.595 | 0.044 |
| 0.480 | 0.470 | 2.220 | 1.220 | 1.054 | 1.088 | 1.154 | 1.006 | 0.902 | 0.805 | 0.579 | 0.042 |
| 0.359 | 0.325 | 2.149 | 1.211 | 1.395 | 1.324 | 1.348 | 1.345 | 1.317 | 0.037 | 0.037 | 0.037 |
| 0.228 | 0.199 | 1.240 | 1.151 | 1.183 | 0.034 | 0.049 | 0.046 | 0.048 | 0.049 | 0.049 | 0.049 |
| 0.125 | 0.110 | 1.223 | 1.132 | 1.146 | 0.038 | 0.048 | 0.054 | 0.052 | 0.052 | 0.052 | 0.051 |

5

|       |       |  |       |       |       |       |       |       |       |       |       |
|-------|-------|--|-------|-------|-------|-------|-------|-------|-------|-------|-------|
| 1.434 | 1.258 |  | 1.090 | 1.648 | 1.876 | 1.649 | 1.627 | 1.535 |       |       |       |
| 1.217 | 1.201 |  | 1.149 |       |       |       |       |       |       |       |       |
| 1.205 | 1.143 |  | 1.109 |       |       |       |       |       |       |       |       |
| 0.935 | 0.845 |  | 1.182 |       |       |       |       |       |       |       |       |
| 0.477 | 0.469 |  | 1.181 |       |       |       |       |       |       |       |       |
| 0.360 | 0.323 |  | 1.167 |       |       |       |       |       |       |       |       |
| 0.229 | 0.200 |  |       |       |       | 0.049 | 0.047 | 0.048 | 0.049 | 0.049 | 0.049 |
| 0.125 | 0.110 |  |       |       |       | 0.048 | 0.054 | 0.052 | 0.052 | 0.052 | 0.051 |

6

|       |       |       |       |       |       |       |       |       |       |       |       |
|-------|-------|-------|-------|-------|-------|-------|-------|-------|-------|-------|-------|
| 1.013 | 0.810 |       | 0.668 | 0.808 | 0.940 | 0.720 | 0.798 | 0.687 | 0.904 | 0.845 | 0.043 |
| 0.709 | 0.827 |       | 0.703 | 0.142 | 0.156 | 0.136 | 0.137 | 0.116 | 0.990 | 0.846 | 0.042 |
| 0.682 | 0.692 |       | 0.680 | 0.197 | 0.188 | 0.190 | 0.191 | 0.184 | 1.023 | 0.861 | 0.043 |
| 0.507 | 0.519 |       | 0.740 | 0.316 | 0.264 | 0.364 | 0.377 | 0.312 | 1.111 | 0.870 | 0.043 |
| 0.394 | 0.406 |       | 0.682 | 0.580 | 0.561 | 0.600 | 0.529 | 0.563 | 0.962 | 0.834 | 0.042 |
| 0.333 | 0.322 |       | 0.661 | 0.995 | 0.930 | 0.848 | 0.832 | 0.797 | 0.037 | 0.037 | 0.037 |
| 0.229 | 0.201 | 0.843 | 0.679 | 0.732 |       | 0.048 | 0.046 | 0.047 |       |       | 0.047 |
| 0.124 | 0.111 | 0.773 | 0.682 | 0.701 |       | 0.047 | 0.053 | 0.051 | 0.051 | 0.052 | 0.051 |

7

Absorbance @ 450 (1.0s) (A)  
0.000





|                    |              |                              |                      |                            |                              |
|--------------------|--------------|------------------------------|----------------------|----------------------------|------------------------------|
| Project number     | F-120        | Apparatus                    | Wallac Victor        | Operator                   | IsBa                         |
| GLP Study (Number) | n.a.         | Protocol (instrument method) | LDH test 2016        | Date of preparation        | 19-04-18                     |
| hot substance      | isotope      | n.a.                         | File name (results)  | IsBa_180419/20_LDH_full_v2 | Date of measurement          |
|                    | name         | n.a.                         | Kind of well plate   | 96 well                    | shaking time [min]           |
|                    | ACB-ID       | n.a.                         | sample volume [µL]   | 100                        | stirring rate (Target) [rpm] |
| cold substance     | Batch number | n.a.                         | Cocktail volume [µL] | 175                        | Kind of measurement          |
|                    | name         | LDH                          | ACB-ID of cocktail   | n.a.                       | Wave length [nm]             |
|                    | ACB-ID       | L23982R                      | Matrix               | DMEM (from powder)+PEG     | Remarks                      |
|                    | Batch number | SLBK6345V                    | Blank description    | DMEM/PEG, H2O              | Remarks                      |
| n.a.               | n.a.         | Pipettes (No. / volume)      | 50-200µl             | Remarks                    | KLP4 common for both         |
| n.a.               | n.a.         | Pipettes (No. / volume)      | n.a.                 | Remarks                    | n.a.                         |

Messdaten (diese Tabelle in Bericht übernehmen)

| Sample name * | concentration (theor.) * | measured data | measured data | measured data | mean measured | SD    | RSD  | Blank * | measured data after * Blank subtraction | concentration (calc.) * | Deviation * | Residuen |
|---------------|--------------------------|---------------|---------------|---------------|---------------|-------|------|---------|-----------------------------------------|-------------------------|-------------|----------|
|               | [µg/mL]                  | [AU]          | [AU]          | [AU]          | [AU]          | [AU]  | [%]  | [AU]    |                                         | [µg/mL]                 | [%]         |          |
| KLP1          |                          |               |               |               |               |       |      | 0.047   |                                         |                         |             |          |
| KLP2          |                          |               |               |               |               |       |      | 0.054   |                                         |                         |             |          |
| KLP3          |                          |               |               |               |               |       |      | 0.051   |                                         |                         |             |          |
| KLP4          | 0.041                    | 0.959         | 0.972         | 0.883         | 0.938         | 0.04  | 4.19 | 0.051   | 0.887                                   | 0.041                   | -0.57       | 0.00     |
| KLP5          | 0.018                    | 0.483         | 0.484         | 0.474         | 0.480         | 0.00  | 0.98 | 0.052   | 0.429                                   | 0.019                   | 2.42        | 0.00     |
| KLP6          | 0.012                    | 0.360         | 0.359         | 0.326         | 0.348         | 0.02  | 4.54 | 0.051   | 0.297                                   | 0.013                   | 5.00        | 0.00     |
| KLP7          | 0.007                    | 0.228         | 0.228         | 0.199         | 0.218         | 0.014 | 6.35 |         | 0.168                                   | 0.006                   | -11.29      | 0.00     |
| KLP8          |                          |               |               |               |               |       |      |         |                                         |                         |             |          |

Statistical data

|                                              |                                          |                     |              |
|----------------------------------------------|------------------------------------------|---------------------|--------------|
| Geradensteigung                              | Slope                                    | m                   | 21.03        |
| Y-Achsenabschnitt                            | Y-Intercept                              | b                   | 0.03         |
| Standardabw. Geradensteigung                 | SD-Slope                                 | S <sub>m</sub>      | 0.648055501  |
| Standardabw. Achsenabschnittes               | SD-Y-Intercept                           | S <sub>b</sub>      | 0.015177452  |
| Anzahl Messpunkte                            | number of measuring points               | n                   | 4            |
| Quadratsumme                                 | sum of squares                           | Q <sub>xx</sub>     | 0.000664046  |
| Bereichsmittle                               |                                          |                     | 0.019557193  |
| Freiheitsgrade                               | degree of freedom                        | f                   | 2            |
| Student-t-Faktor für (P = 95 %; f = n-2)     | Student-t-factor for (P = 95 %; f = n-2) | t                   | 4.303        |
| Vertrauensbereich Steig. (95 %) Obergrenze   |                                          | m + VB <sub>m</sub> | 23.81763508  |
| Vertrauensbereich Steig. (95 %) Untergrenze  |                                          | m - VB <sub>m</sub> | 18.24046944  |
| Vertrauensbereich Achsenabschnitt (95 %) Og. |                                          | b + VB <sub>b</sub> | 0.099335829  |
| Vertrauensbereich Achsenabschnitt (95 %) Ug. |                                          | b - VB <sub>b</sub> | -0.031281327 |
| Korrelationskoeffizient                      | correlation coefficient                  | r                   | 0.9991       |
| Bestimmtheitsmaß                             | determination coefficient                | r <sup>2</sup>      | 0.9981       |
| Reststandardabweichung                       |                                          | S <sub>0</sub>      | 0.01669983   |
| Summe Restquadrate                           |                                          | sd                  | 0.657385838  |
| Verfahrensstandardabw.                       |                                          | S <sub>00</sub>     | 0.000794131  |
| Rel. Verfahrensstandardabw. %                |                                          | V <sub>00</sub>     | 4.060559029  |

Berichten

|                          |       |
|--------------------------|-------|
| mean Blank               | 0     |
| SD Blank                 | 0.00  |
| RSD Blank                | 3.79  |
| x <sup>2</sup> SD (LLOQ) | 0.01  |
| x <sup>2</sup> SD (LOD)  | 0.01  |
| LLOQ (AU)                | 0.061 |
| LOD (AU)                 | 0.067 |
| ULOQ                     | 0.887 |
| LLOQ (Lin)               | 0.168 |

Evaluation / Comment

LDH linearity valid with 7 standards, split in lin high and lin low, each with 4 standards and KLP4 common standard for both. R<sup>2</sup> 0,9981, deviations for both between -13.34% and +13.04%

Date Operator Date Operator Control

Figure 1 Linearity

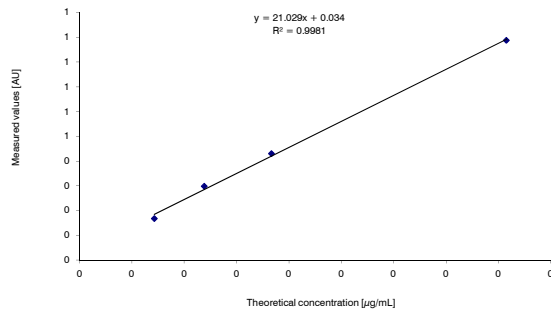

Figure 2 Method validation Residuen Plot

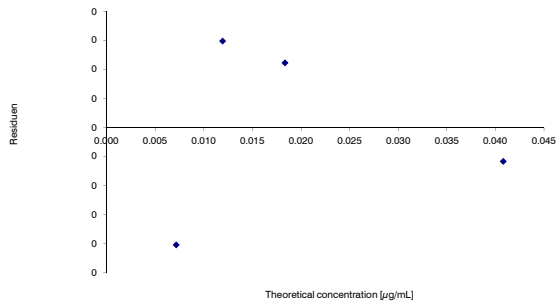

Evaluation / Comment

lin passed

Date

Operator

Date

Control



|                    |              |                              |                                 |                              |                                         |                         |       |
|--------------------|--------------|------------------------------|---------------------------------|------------------------------|-----------------------------------------|-------------------------|-------|
| Project number     | F-120        | Apparatus                    | Wallac Victor                   | Operator                     | IsBa                                    | LLOQ [AU]               | 0.168 |
| GLP Study (Number) | n.a.         | Protocol (Instrument method) | LDH test 2016                   | Date of preparation          | 43209                                   | ULOQ [AU]               | 0.887 |
| hot substance      | Isotope      | File name (results)          | IsBa_180419/20_LDH_full_val_1/2 | Date of measurement          | 43209                                   | Blank                   | 0.051 |
|                    | Name         | Kind of well plate           | 96 well                         | Shaking time [min]           | 30                                      |                         | n.a.  |
|                    | ACB-ID       | sample volume [µL]           | 100                             | Stirring rate (Target) [rpm] | 150                                     |                         | n.a.  |
|                    | Batch number | Cocktail volume [µL]         | 175                             | Kind of measurement          | UV-vis                                  | Pipettes (No. / volume) | n.a.  |
| cold substance     | Name         | ACB-ID of cocktail           | n.a.                            | Wave length [nm]             | 450                                     | Pipettes (No. / volume) | n.a.  |
|                    | ACB-ID       | Matrix                       | DMEM (from powder)+PEG          | Remarks                      | Sui mitgemessen auf der Platte aber Aus | Pipettes (No. / volume) | n.a.  |
|                    | Batch number | Blank description            | DMEM/PEG, H2O                   | Remarks                      | n.a.                                    | Remarks                 | n.a.  |

| Sample name | Plate | Position | [AU]  | [AU]-Blank | Rating       | [µg/mL] | Dilution factor | [µg/mL] |
|-------------|-------|----------|-------|------------|--------------|---------|-----------------|---------|
| 0           | T4    | A01      | 0     | 0          | kleiner LLOQ | #VALUE! | 1               | #VALUE! |
| 0           | T4    | A02      | 0     | 0          | kleiner LLOQ | #VALUE! | 1               | #VALUE! |
| 0           | T4    | A03      | 0     | 0          | kleiner LLOQ | #VALUE! | 1               | #VALUE! |
| 0           | T4    | A04      | 0     | 0          | kleiner LLOQ | #VALUE! | 1               | #VALUE! |
| T4HN1       | T4    | A05      | 0     | 0          | kleiner LLOQ | #VALUE! | 1               | #VALUE! |
| T4HN1       | T4    | A06      | 0     | 0          | kleiner LLOQ | #VALUE! | 1               | #VALUE! |
| T4HN2       | T4    | A07      | 0     | 0          | kleiner LLOQ | #VALUE! | 1               | #VALUE! |
| T4HN2       | T4    | A08      | 0.000 | -0.051     | kleiner LLOQ | #VALUE! | 1               | #VALUE! |
| T4HN3       | T4    | A09      | 0.915 | 0.864      | 0.864        | 0.039   | 24.75           | 0.977   |
| T4HN3       | T4    | A10      | 0.921 | 0.870      | 0.870        | 0.040   | 24.75           | 0.984   |
| T4HN4       | T4    | A11      | 0.436 | 0.385      | 0.385        | 0.017   | 2.75            | 0.046   |
| T4HN4       | T4    | A12      | 0.431 | 0.380      | 0.380        | 0.016   | 2.75            | 0.045   |
| 0           | T4    | B01      | 0     | 0          | kleiner LLOQ | #VALUE! | 1               | #VALUE! |
| 0           | T4    | B02      | 0     | 0          | kleiner LLOQ | #VALUE! | 1               | #VALUE! |
| 0           | T4    | B03      | 0     | 0          | kleiner LLOQ | #VALUE! | 1               | #VALUE! |
| 0           | T4    | B04      | 0     | 0          | kleiner LLOQ | #VALUE! | 1               | #VALUE! |
| T4HS11      | T4    | B05      | 0.000 | -0.051     | kleiner LLOQ | #VALUE! | 1               | #VALUE! |
| T4HS11      | T4    | B06      | 0.846 | 0.795      | 0.795        | 0.036   | 24.75           | 0.896   |
| T4HS12      | T4    | B07      | 0.590 | 0.539      | 0.539        | 0.024   | 24.75           | 0.595   |
| T4HS12      | T4    | B08      | 0.597 | 0.546      | 0.546        | 0.024   | 24.75           | 0.603   |
| T4HS13      | T4    | B09      | 0     | 0          | kleiner LLOQ | #VALUE! | 1               | #VALUE! |
| T4HS13      | T4    | B10      | 0     | 0          | kleiner LLOQ | #VALUE! | 1               | #VALUE! |
| T4HS14      | T4    | B11      | 0.169 | 0.118      | kleiner LLOQ | #VALUE! | 2.75            | #VALUE! |
| T4HS14      | T4    | B12      | 0.174 | 0.124      | kleiner LLOQ | #VALUE! | 2.75            | #VALUE! |
| 0           | T4    | C01      | 0     | 0          | kleiner LLOQ | #VALUE! | 1               | #VALUE! |
| 0           | T4    | C02      | 0     | 0          | kleiner LLOQ | #VALUE! | 1               | #VALUE! |
| 0           | T4    | C03      | 0     | 0          | kleiner LLOQ | #VALUE! | 1               | #VALUE! |
| 0           | T4    | C04      | 0     | 0          | kleiner LLOQ | #VALUE! | 1               | #VALUE! |
| T4HS21      | T4    | C05      | 0.558 | 0.507      | 0.507        | 0.022   | 11              | 0.247   |
| T4HS21      | T4    | C06      | 0.564 | 0.513      | 0.513        | 0.023   | 11              | 0.250   |
| T4HS22      | T4    | C07      | 0.603 | 0.552      | 0.552        | 0.025   | 11              | 0.271   |
| T4HS22      | T4    | C08      | 0.587 | 0.536      | 0.536        | 0.024   | 11              | 0.263   |
| T4HS23      | T4    | C09      | 0.591 | 0.540      | 0.540        | 0.024   | 11              | 0.264   |
| T4HS23      | T4    | C10      | 0.594 | 0.543      | 0.543        | 0.024   | 11              | 0.266   |
| T4HS24      | T4    | C11      | 0.198 | 0.147      | kleiner LLOQ | #VALUE! | 2.75            | #VALUE! |
| T4HS24      | T4    | C12      | 0.201 | 0.150      | kleiner LLOQ | #VALUE! | 2.75            | #VALUE! |
| 0           | T4    | D01      | 0     | 0          | kleiner LLOQ | #VALUE! | 1               | #VALUE! |
| 0           | T4    | D02      | 0     | 0          | kleiner LLOQ | #VALUE! | 1               | #VALUE! |
| 0           | T4    | D03      | 0     | 0          | kleiner LLOQ | #VALUE! | 1               | #VALUE! |
| 0           | T4    | D04      | 0     | 0          | kleiner LLOQ | #VALUE! | 1               | #VALUE! |
| 0           | T4    | D05      | 0     | 0          | kleiner LLOQ | #VALUE! | 1               | #VALUE! |
| 0           | T4    | D06      | 0     | 0          | kleiner LLOQ | #VALUE! | 1               | #VALUE! |
| 0           | T4    | D07      | 0     | 0          | kleiner LLOQ | #VALUE! | 1               | #VALUE! |
| 0           | T4    | D08      | 0     | 0          | kleiner LLOQ | #VALUE! | 1               | #VALUE! |
| 0           | T4    | D09      | 0     | 0          | kleiner LLOQ | #VALUE! | 1               | #VALUE! |
| 0           | T4    | D10      | 0     | 0          | kleiner LLOQ | #VALUE! | 1               | #VALUE! |
| 0           | T4    | D11      | 0     | 0          | kleiner LLOQ | #VALUE! | 1               | #VALUE! |
| 0           | T4    | D12      | 0     | 0          | kleiner LLOQ | #VALUE! | 1               | #VALUE! |

Plate: T4

| Test | Test  | Test  | Test | Test | Test  | Test  | Test  | Test  | Test  | Test  | Test  | Test  | Test |
|------|-------|-------|------|------|-------|-------|-------|-------|-------|-------|-------|-------|------|
|      | 1     | 2     | 3    | 4    | 5     | 6     | 7     | 8     | 9     | 10    | 11    | 12    |      |
| A    |       |       |      |      |       |       |       |       | 0.915 | 0.921 | 0.436 | 0.431 |      |
| B    |       |       |      |      |       | 0.846 | 0.590 | 0.597 |       |       | 0.169 | 0.174 |      |
| C    |       |       |      |      | 0.558 | 0.564 | 0.603 | 0.587 | 0.591 | 0.594 | 0.198 | 0.201 |      |
| D    |       |       |      |      |       |       |       |       |       |       |       |       |      |
| E    |       |       |      |      |       |       |       |       |       |       |       |       |      |
| F    |       |       |      |      |       |       |       |       |       |       |       |       |      |
| G    | 0.633 | 0.717 |      |      |       |       | 0.052 | 0.054 | 0.052 | 0.052 | 0.052 | 0.051 |      |
| H    |       |       |      |      |       |       | 0.050 | 0.050 | 0.053 | 0.050 | 0.051 | 0.050 |      |

| Plattenbelegung | 1      | 2      | 3 | 4      | 5      | 6      | 7            | 8            | 9            | 10           | 11           | 12           |
|-----------------|--------|--------|---|--------|--------|--------|--------------|--------------|--------------|--------------|--------------|--------------|
| A               |        |        |   |        |        |        |              |              |              |              |              |              |
| B               |        |        |   | T4HN1  | T4HN1  | T4HN2  | T4HN2        | T4HN3        | T4HN3        | T4HN4        | T4HN4        |              |
| C               |        |        |   | T4HS11 | T4HS11 | T4HS12 | T4HS12       | T4HS13       | T4HS13       | T4HS14       | T4HS14       |              |
| D               |        |        |   | T4HS21 | T4HS21 | T4HS22 | T4HS22       | T4HS23       | T4HS23       | T4HS24       | T4HS24       |              |
| E               |        |        |   |        |        |        |              |              |              |              |              |              |
| F               |        |        |   |        |        |        |              |              |              |              |              |              |
| G               | T4HS13 | T4HS13 |   |        |        |        | Blank PEG    | Blank PEG    | Blank PEG    | Blank PEG    | Blank PEG    | Blank PEG    |
| H               |        |        |   |        |        |        | Blank no PEG | Blank no PEG | Blank no PEG | Blank no PEG | Blank no PEG | Blank no PEG |

Samples aufgeteilt in lin high und low: höher konzentrierte Samples bei lin high zu finden.

dil 9\*dil2,75=dil.24.75  
 dil 4\*dil2,75=dil.11

Comment:

Date Operator Date Control

|              |    |     |       |       |              |         |       |         |
|--------------|----|-----|-------|-------|--------------|---------|-------|---------|
| 0            | T4 | E01 | 0     | 0     | kleiner LLOQ | #VALUE! | 1     | #VALUE! |
| 0            | T4 | E02 | 0     | 0     | kleiner LLOQ | #VALUE! | 1     | #VALUE! |
| 0            | T4 | E03 | 0     | 0     | kleiner LLOQ | #VALUE! | 1     | #VALUE! |
| 0            | T4 | E04 | 0     | 0     | kleiner LLOQ | #VALUE! | 1     | #VALUE! |
| 0            | T4 | E05 | 0     | 0     | kleiner LLOQ | #VALUE! | 1     | #VALUE! |
| 0            | T4 | E06 | 0     | 0     | kleiner LLOQ | #VALUE! | 1     | #VALUE! |
| 0            | T4 | E07 | 0     | 0     | kleiner LLOQ | #VALUE! | 1     | #VALUE! |
| 0            | T4 | E08 | 0     | 0     | kleiner LLOQ | #VALUE! | 1     | #VALUE! |
| 0            | T4 | E09 | 0     | 0     | kleiner LLOQ | #VALUE! | 1     | #VALUE! |
| 0            | T4 | E10 | 0     | 0     | kleiner LLOQ | #VALUE! | 1     | #VALUE! |
| 0            | T4 | E11 | 0     | 0     | kleiner LLOQ | #VALUE! | 1     | #VALUE! |
| 0            | T4 | E12 | 0     | 0     | kleiner LLOQ | #VALUE! | 1     | #VALUE! |
| 0            | T4 | F01 | 0     | 0     | kleiner LLOQ | #VALUE! | 1     | #VALUE! |
| 0            | T4 | F02 | 0     | 0     | kleiner LLOQ | #VALUE! | 1     | #VALUE! |
| 0            | T4 | F03 | 0     | 0     | kleiner LLOQ | #VALUE! | 1     | #VALUE! |
| 0            | T4 | F04 | 0     | 0     | kleiner LLOQ | #VALUE! | 1     | #VALUE! |
| 0            | T4 | F05 | 0     | 0     | kleiner LLOQ | #VALUE! | 1     | #VALUE! |
| 0            | T4 | F06 | 0     | 0     | kleiner LLOQ | #VALUE! | 1     | #VALUE! |
| 0            | T4 | F07 | 0     | 0     | kleiner LLOQ | #VALUE! | 1     | #VALUE! |
| 0            | T4 | F08 | 0     | 0     | kleiner LLOQ | #VALUE! | 1     | #VALUE! |
| 0            | T4 | F09 | 0     | 0     | kleiner LLOQ | #VALUE! | 1     | #VALUE! |
| 0            | T4 | F10 | 0     | 0     | kleiner LLOQ | #VALUE! | 1     | #VALUE! |
| 0            | T4 | F11 | 0     | 0     | kleiner LLOQ | #VALUE! | 1     | #VALUE! |
| 0            | T4 | F12 | 0     | 0     | kleiner LLOQ | #VALUE! | 1     | #VALUE! |
| T4HS13       | T4 | G01 | 0.633 | 0.582 | 0.582        | 0.028   | 24.75 | 0.645   |
| T4HS13       | T4 | G02 | 0.717 | 0.666 | 0.666        | 0.030   | 24.75 | 0.744   |
| 0            | T4 | G03 | 0     | 0     | kleiner LLOQ | #VALUE! | 1     | #VALUE! |
| 0            | T4 | G04 | 0     | 0     | kleiner LLOQ | #VALUE! | 1     | #VALUE! |
| 0            | T4 | G05 | 0     | 0     | kleiner LLOQ | #VALUE! | 1     | #VALUE! |
| 0            | T4 | G06 | 0     | 0     | kleiner LLOQ | #VALUE! | 1     | #VALUE! |
| Blank PEG    | T4 | G07 | 0     | 0     | kleiner LLOQ | #VALUE! | 2.75  | #VALUE! |
| Blank PEG    | T4 | G08 | 0     | 0     | kleiner LLOQ | #VALUE! | 2.75  | #VALUE! |
| Blank PEG    | T4 | G09 | 0     | 0     | kleiner LLOQ | #VALUE! | 2.75  | #VALUE! |
| Blank PEG    | T4 | G10 | 0     | 0     | kleiner LLOQ | #VALUE! | 2.75  | #VALUE! |
| Blank PEG    | T4 | G11 | 0     | 0     | kleiner LLOQ | #VALUE! | 2.75  | #VALUE! |
| Blank PEG    | T4 | G12 | 0     | 0     | kleiner LLOQ | #VALUE! | 2.75  | #VALUE! |
| 0            | T4 | H01 | 0     | 0     | kleiner LLOQ | #VALUE! | 1     | #VALUE! |
| 0            | T4 | H02 | 0     | 0     | kleiner LLOQ | #VALUE! | 1     | #VALUE! |
| 0            | T4 | H03 | 0     | 0     | kleiner LLOQ | #VALUE! | 1     | #VALUE! |
| 0            | T4 | H04 | 0     | 0     | kleiner LLOQ | #VALUE! | 1     | #VALUE! |
| 0            | T4 | H05 | 0     | 0     | kleiner LLOQ | #VALUE! | 1     | #VALUE! |
| 0            | T4 | H06 | 0     | 0     | kleiner LLOQ | #VALUE! | 1     | #VALUE! |
| Blank no PEG | T4 | H07 | 0     | 0     | kleiner LLOQ | #VALUE! | 2.75  | #VALUE! |
| Blank no PEG | T4 | H08 | 0     | 0     | kleiner LLOQ | #VALUE! | 2.75  | #VALUE! |
| Blank no PEG | T4 | H09 | 0     | 0     | kleiner LLOQ | #VALUE! | 2.75  | #VALUE! |
| Blank no PEG | T4 | H10 | 0     | 0     | kleiner LLOQ | #VALUE! | 2.75  | #VALUE! |
| Blank no PEG | T4 | H11 | 0     | 0     | kleiner LLOQ | #VALUE! | 2.75  | #VALUE! |
| Blank no PEG | T4 | H12 | 0     | 0     | kleiner LLOQ | #VALUE! | 2.75  | #VALUE! |

|        |    |     |       |       |              |         |      |         |
|--------|----|-----|-------|-------|--------------|---------|------|---------|
| 0      | T5 | A01 | 0     | 0     | kleiner LLOQ | #VALUE! | 1    | #VALUE! |
| 0      | T5 | A02 | 0     | 0     | kleiner LLOQ | #VALUE! | 1    | #VALUE! |
| 0      | T5 | A03 | 0     | 0     | kleiner LLOQ | #VALUE! | 1    | #VALUE! |
| 0      | T5 | A04 | 0     | 0     | kleiner LLOQ | #VALUE! | 1    | #VALUE! |
| T5HN1  | T5 | A05 | 0.749 | 0.699 | 0.699        | 0.032   | 27.5 | 0.869   |
| T5HN1  | T5 | A06 | 0.763 | 0.712 | 0.712        | 0.032   | 27.5 | 0.886   |
| T5HN2  | T5 | A07 | 0     | 0     | kleiner LLOQ | #VALUE! | 1    | #VALUE! |
| T5HN2  | T5 | A08 | 0     | 0     | kleiner LLOQ | #VALUE! | 1    | #VALUE! |
| T5HN3  | T5 | A09 | 0     | 0     | kleiner LLOQ | #VALUE! | 1    | #VALUE! |
| T5HN3  | T5 | A10 | 0     | 0     | kleiner LLOQ | #VALUE! | 1    | #VALUE! |
| T5HN4  | T5 | A11 | 0.735 | 0.684 | 0.684        | 0.031   | 2.75 | 0.085   |
| T5HN4  | T5 | A12 | 0.717 | 0.666 | 0.666        | 0.030   | 2.75 | 0.083   |
| 0      | T5 | B01 | 0     | 0     | kleiner LLOQ | #VALUE! | 1    | #VALUE! |
| 0      | T5 | B02 | 0     | 0     | kleiner LLOQ | #VALUE! | 1    | #VALUE! |
| 0      | T5 | B03 | 0     | 0     | kleiner LLOQ | #VALUE! | 1    | #VALUE! |
| 0      | T5 | B04 | 0     | 0     | kleiner LLOQ | #VALUE! | 1    | #VALUE! |
| T5HS11 | T5 | B05 | 0.323 | 0.272 | 0.272        | 0.011   | 2.75 | 0.031   |
| T5HS11 | T5 | B06 | 0.315 | 0.265 | 0.265        | 0.011   | 2.75 | 0.030   |
| T5HS12 | T5 | B07 | 0.263 | 0.212 | 0.212        | 0.008   | 2.75 | 0.023   |
| T5HS12 | T5 | B08 | 0.273 | 0.222 | 0.222        | 0.009   | 2.75 | 0.025   |
| T5HS13 | T5 | B09 | 0.403 | 0.352 | 0.352        | 0.015   | 2.75 | 0.042   |
| T5HS13 | T5 | B10 | 0.405 | 0.354 | 0.354        | 0.015   | 2.75 | 0.042   |
| T5HS14 | T5 | B11 | 0.192 | 0.141 | kleiner LLOQ | #VALUE! | 2.75 | #VALUE! |
| T5HS14 | T5 | B12 | 0.198 | 0.147 | kleiner LLOQ | #VALUE! | 2.75 | #VALUE! |
| 0      | T5 | C01 | 0     | 0     | kleiner LLOQ | #VALUE! | 1    | #VALUE! |
| 0      | T5 | C02 | 0     | 0     | kleiner LLOQ | #VALUE! | 1    | #VALUE! |
| 0      | T5 | C03 | 0     | 0     | kleiner LLOQ | #VALUE! | 1    | #VALUE! |
| 0      | T5 | C04 | 0     | 0     | kleiner LLOQ | #VALUE! | 1    | #VALUE! |
| T5HS21 | T5 | C05 | 0.636 | 0.585 | 0.585        | 0.026   | 8.25 | 0.216   |
| T5HS21 | T5 | C06 | 0.661 | 0.610 | 0.610        | 0.027   | 8.25 | 0.226   |
| T5HS22 | T5 | C07 | 0.715 | 0.664 | 0.664        | 0.030   | 8.25 | 0.247   |
| T5HS22 | T5 | C08 | 0.706 | 0.655 | 0.655        | 0.030   | 8.25 | 0.244   |
| T5HS23 | T5 | C09 | 0     | 0     | kleiner LLOQ | #VALUE! | 1    | #VALUE! |
| T5HS23 | T5 | C10 | 0     | 0     | kleiner LLOQ | #VALUE! | 1    | #VALUE! |
| T5HS24 | T5 | C11 | 0.232 | 0.181 | 0.181        | 0.007   | 2.75 | 0.019   |
| T5HS24 | T5 | C12 | 0.230 | 0.179 | 0.179        | 0.007   | 2.75 | 0.019   |
| 0      | T5 | D01 | 0     | 0     | kleiner LLOQ | #VALUE! | 1    | #VALUE! |
| 0      | T5 | D02 | 0     | 0     | kleiner LLOQ | #VALUE! | 1    | #VALUE! |
| 0      | T5 | D03 | 0     | 0     | kleiner LLOQ | #VALUE! | 1    | #VALUE! |
| 0      | T5 | D04 | 0     | 0     | kleiner LLOQ | #VALUE! | 1    | #VALUE! |
| 0      | T5 | D05 | 0     | 0     | kleiner LLOQ | #VALUE! | 1    | #VALUE! |
| 0      | T5 | D06 | 0     | 0     | kleiner LLOQ | #VALUE! | 1    | #VALUE! |
| 0      | T5 | D07 | 0     | 0     | kleiner LLOQ | #VALUE! | 1    | #VALUE! |
| 0      | T5 | D08 | 0     | 0     | kleiner LLOQ | #VALUE! | 1    | #VALUE! |
| 0      | T5 | D09 | 0     | 0     | kleiner LLOQ | #VALUE! | 1    | #VALUE! |
| 0      | T5 | D10 | 0     | 0     | kleiner LLOQ | #VALUE! | 1    | #VALUE! |
| 0      | T5 | D11 | 0     | 0     | kleiner LLOQ | #VALUE! | 1    | #VALUE! |
| 0      | T5 | D12 | 0     | 0     | kleiner LLOQ | #VALUE! | 1    | #VALUE! |

Plate: T5

|   |   |   |   |   |       |       |       |       |       |       |       |       |       |
|---|---|---|---|---|-------|-------|-------|-------|-------|-------|-------|-------|-------|
|   | 1 | 2 | 3 | 4 | 5     | 6     | 7     | 8     | 9     | 10    | 11    | 12    |       |
| A |   |   |   |   | 0.749 | 0.763 |       |       |       |       |       | 0.735 | 0.717 |
| B |   |   |   |   | 0.323 | 0.315 | 0.263 | 0.273 | 0.403 | 0.405 |       | 0.192 | 0.198 |
| C |   |   |   |   | 0.636 | 0.661 | 0.715 | 0.706 |       |       |       | 0.232 | 0.230 |
| D |   |   |   |   |       |       |       |       |       |       |       |       |       |
| E |   |   |   |   |       |       |       |       |       |       |       |       |       |
| F |   |   |   |   |       |       |       |       |       |       |       |       |       |
| G |   |   |   |   |       |       | 0.053 | 0.053 | 0.054 | 0.053 | 0.053 | 0.052 | 0.052 |
| H |   |   |   |   |       |       | 0.101 | 0.056 | 0.052 | 0.050 | 0.054 | 0.053 | 0.053 |

Plattenbelegung

|   |   |   |   |   |        |        |              |              |              |              |              |              |
|---|---|---|---|---|--------|--------|--------------|--------------|--------------|--------------|--------------|--------------|
|   | 1 | 2 | 3 | 4 | 5      | 6      | 7            | 8            | 9            | 10           | 11           | 12           |
| A |   |   |   |   | T5HN1  | T5HN1  | T5HN2        | T5HN2        | T5HN3        | T5HN3        | T5HN4        | T5HN4        |
| B |   |   |   |   | T5HS11 | T5HS11 | T5HS12       | T5HS12       | T5HS13       | T5HS13       | T5HS14       | T5HS14       |
| C |   |   |   |   | T5HS21 | T5HS21 | T5HS22       | T5HS22       | T5HS23       | T5HS23       | T5HS24       | T5HS24       |
| D |   |   |   |   |        |        |              |              |              |              |              |              |
| E |   |   |   |   |        |        |              |              |              |              |              |              |
| F |   |   |   |   |        |        |              |              |              |              |              |              |
| G |   |   |   |   |        |        | Blank PEG    | Blank PEG    | Blank PEG    | Blank PEG    | Blank PEG    | Blank PEG    |
| H |   |   |   |   |        |        | Blank no PEG | Blank no PEG | Blank no PEG | Blank no PEG | Blank no PEG | Blank no PEG |

dil 10\*dil2,75=dil.27,5  
dil3\*dil2,75=dil.8,25

Comment:

Date \_\_\_\_\_ Operator \_\_\_\_\_

Date \_\_\_\_\_ Control \_\_\_\_\_

|              |    |     |       |        |              |         |       |         |
|--------------|----|-----|-------|--------|--------------|---------|-------|---------|
| 0            | T5 | E01 | 0     | 0      | kleiner LLOQ | #VALUE! | 1     | #VALUE! |
| 0            | T5 | E02 | 0     | 0      | kleiner LLOQ | #VALUE! | 1     | #VALUE! |
| 0            | T5 | E03 | 0     | 0      | kleiner LLOQ | #VALUE! | 1     | #VALUE! |
| 0            | T5 | E04 | 0     | 0      | kleiner LLOQ | #VALUE! | 1     | #VALUE! |
| 0            | T5 | E05 | 0     | 0      | kleiner LLOQ | #VALUE! | 1     | #VALUE! |
| 0            | T5 | E06 | 0     | 0      | kleiner LLOQ | #VALUE! | 1     | #VALUE! |
| 0            | T5 | E07 | 0     | 0      | kleiner LLOQ | #VALUE! | 1     | #VALUE! |
| 0            | T5 | E08 | 0     | 0      | kleiner LLOQ | #VALUE! | 1     | #VALUE! |
| 0            | T5 | E09 | 0     | 0      | kleiner LLOQ | #VALUE! | 1     | #VALUE! |
| 0            | T5 | E10 | 0     | 0      | kleiner LLOQ | #VALUE! | 1     | #VALUE! |
| 0            | T5 | E11 | 0     | 0      | kleiner LLOQ | #VALUE! | 1     | #VALUE! |
| 0            | T5 | E12 | 0     | 0      | kleiner LLOQ | #VALUE! | 1     | #VALUE! |
| 0            | T5 | F01 | 0     | 0      | kleiner LLOQ | #VALUE! | 1     | #VALUE! |
| 0            | T5 | F02 | 0     | 0      | kleiner LLOQ | #VALUE! | 1     | #VALUE! |
| 0            | T5 | F03 | 0     | 0      | kleiner LLOQ | #VALUE! | 1     | #VALUE! |
| 0            | T5 | F04 | 0     | 0      | kleiner LLOQ | #VALUE! | 1     | #VALUE! |
| 0            | T5 | F05 | 0     | 0      | kleiner LLOQ | #VALUE! | 1     | #VALUE! |
| 0            | T5 | F06 | 0     | 0      | kleiner LLOQ | #VALUE! | 1     | #VALUE! |
| 0            | T5 | F07 | 0     | 0      | kleiner LLOQ | #VALUE! | 1     | #VALUE! |
| 0            | T5 | F08 | 0     | 0      | kleiner LLOQ | #VALUE! | 1     | #VALUE! |
| 0            | T5 | F09 | 0     | 0      | kleiner LLOQ | #VALUE! | 1     | #VALUE! |
| 0            | T5 | F10 | 0     | 0      | kleiner LLOQ | #VALUE! | 1     | #VALUE! |
| 0            | T5 | F11 | 0     | 0      | kleiner LLOQ | #VALUE! | 1     | #VALUE! |
| 0            | T5 | F12 | 0     | 0      | kleiner LLOQ | #VALUE! | 1     | #VALUE! |
| 0            | T5 | G01 | 0     | 0      | kleiner LLOQ | #VALUE! | 1     | #VALUE! |
| 0            | T5 | G02 | 0     | 0      | kleiner LLOQ | #VALUE! | 1     | #VALUE! |
| 0            | T5 | G03 | 0     | 0      | kleiner LLOQ | #VALUE! | 1     | #VALUE! |
| 0            | T5 | G04 | 0     | 0      | kleiner LLOQ | #VALUE! | 1     | #VALUE! |
| 0            | T5 | G05 | 0     | 0      | kleiner LLOQ | #VALUE! | 1     | #VALUE! |
| 0            | T5 | G06 | 0     | 0      | kleiner LLOQ | #VALUE! | 1     | #VALUE! |
| Blank PEG    | T5 | G07 | 0.053 | 0.002  | kleiner LLOQ | #VALUE! | 2.75  | #VALUE! |
| Blank PEG    | T5 | G08 | 0.053 | 0.002  | kleiner LLOQ | #VALUE! | 2.75  | #VALUE! |
| Blank PEG    | T5 | G09 | 0.054 | 0.003  | kleiner LLOQ | #VALUE! | 2.75  | #VALUE! |
| Blank PEG    | T5 | G10 | 0.053 | 0.002  | kleiner LLOQ | #VALUE! | 2.75  | #VALUE! |
| Blank PEG    | T5 | G11 | 0.053 | 0.002  | kleiner LLOQ | #VALUE! | 2.75  | #VALUE! |
| Blank PEG    | T5 | G12 | 0.052 | 0.001  | kleiner LLOQ | #VALUE! | 2.75  | #VALUE! |
| 0            | T5 | H01 | 0     | 0      | kleiner LLOQ | #VALUE! | 1     | #VALUE! |
| 0            | T5 | H02 | 0     | 0      | kleiner LLOQ | #VALUE! | 1     | #VALUE! |
| 0            | T5 | H03 | 0     | 0      | kleiner LLOQ | #VALUE! | 1     | #VALUE! |
| 0            | T5 | H04 | 0     | 0      | kleiner LLOQ | #VALUE! | 1     | #VALUE! |
| 0            | T5 | H05 | 0     | 0      | kleiner LLOQ | #VALUE! | 1     | #VALUE! |
| 0            | T5 | H06 | 0     | 0      | kleiner LLOQ | #VALUE! | 1     | #VALUE! |
| Blank no PEG | T5 | H07 | 0.101 | 0.050  | kleiner LLOQ | #VALUE! | 2.75  | #VALUE! |
| Blank no PEG | T5 | H08 | 0.056 | 0.005  | kleiner LLOQ | #VALUE! | 2.75  | #VALUE! |
| Blank no PEG | T5 | H09 | 0.052 | 0.001  | kleiner LLOQ | #VALUE! | 2.75  | #VALUE! |
| Blank no PEG | T5 | H10 | 0.050 | -0.001 | kleiner LLOQ | #VALUE! | 2.75  | #VALUE! |
| Blank no PEG | T5 | H11 | 0.054 | 0.003  | kleiner LLOQ | #VALUE! | 2.75  | #VALUE! |
| Blank no PEG | T5 | H12 | 0.053 | 0.002  | kleiner LLOQ | #VALUE! | 2.75  | #VALUE! |
| 0            | T6 | A01 | 0     | 0      | kleiner LLOQ | #VALUE! | 1     | #VALUE! |
| 0            | T6 | A02 | 0     | 0      | kleiner LLOQ | #VALUE! | 1     | #VALUE! |
| 0            | T6 | A03 | 0     | 0      | kleiner LLOQ | #VALUE! | 1     | #VALUE! |
| 0            | T6 | A04 | 0     | 0      | kleiner LLOQ | #VALUE! | 1     | #VALUE! |
| T6HN1        | T6 | A05 | 0.873 | 0.822  | 0.822        | 0.037   | 22    | 0.824   |
| T6HN1        | T6 | A06 | 0.588 | 0.537  | 0.024        | 22      | 0.526 |         |
| T6HN2        | T6 | A07 | 0.744 | 0.693  | 0.031        | 22      | 0.690 |         |
| T6HN2        | T6 | A08 | 0.778 | 0.727  | 0.033        | 22      | 0.725 |         |
| T6HN3        | T6 | A09 | 0.518 | 0.467  | 0.021        | 22      | 0.453 |         |
| T6HN3        | T6 | A10 | 0.513 | 0.462  | 0.020        | 22      | 0.448 |         |
| T6HN4        | T6 | A11 | 0.634 | 0.583  | 0.026        | 2.75    | 0.072 |         |
| T6HN4        | T6 | A12 | 0.620 | 0.569  | 0.025        | 2.75    | 0.070 |         |
| 0            | T6 | B01 | 0     | 0      | kleiner LLOQ | #VALUE! | 1     | #VALUE! |
| 0            | T6 | B02 | 0     | 0      | kleiner LLOQ | #VALUE! | 1     | #VALUE! |
| 0            | T6 | B03 | 0     | 0      | kleiner LLOQ | #VALUE! | 1     | #VALUE! |
| 0            | T6 | B04 | 0     | 0      | kleiner LLOQ | #VALUE! | 1     | #VALUE! |
| T6HS11       | T6 | B05 | 0.274 | 0.223  | 0.009        | 2.75    | 0.025 |         |
| T6HS11       | T6 | B06 | 0.273 | 0.222  | 0.009        | 2.75    | 0.025 |         |
| T6HS12       | T6 | B07 | 0.262 | 0.211  | 0.008        | 2.75    | 0.023 |         |
| T6HS12       | T6 | B08 | 0.271 | 0.220  | 0.009        | 2.75    | 0.024 |         |
| T6HS13       | T6 | B09 | 0.261 | 0.210  | 0.008        | 2.75    | 0.023 |         |
| T6HS13       | T6 | B10 | 0.272 | 0.221  | 0.009        | 2.75    | 0.024 |         |
| T6HS14       | T6 | B11 | 0.190 | 0.139  | kleiner LLOQ | #VALUE! | 2.75  | #VALUE! |
| T6HS14       | T6 | B12 | 0.194 | 0.143  | kleiner LLOQ | #VALUE! | 2.75  | #VALUE! |
| 0            | T6 | C01 | 0     | 0      | kleiner LLOQ | #VALUE! | 1     | #VALUE! |

Plate: T6

|   | 1 | 2 | 3 | 4 | 5     | 6     | 7     | 8     | 9     | 10    | 11    | 12    |
|---|---|---|---|---|-------|-------|-------|-------|-------|-------|-------|-------|
| A |   |   |   |   | 0.873 | 0.588 | 0.744 | 0.778 | 0.518 | 0.513 | 0.634 | 0.620 |
| B |   |   |   |   | 0.274 | 0.273 | 0.262 | 0.271 | 0.261 | 0.272 | 0.190 | 0.194 |
| C |   |   |   |   |       |       |       |       |       |       | 0.232 | 0.227 |
| D |   |   |   |   |       |       |       |       |       |       |       |       |
| E |   |   |   |   |       |       |       |       |       |       |       |       |
| F |   |   |   |   |       |       |       |       |       |       |       |       |
| G |   |   |   |   |       |       | 0.051 | 0.050 | 0.050 | 0.052 | 0.051 | 0.051 |
| H |   |   |   |   |       |       | 0.050 | 0.050 | 0.050 | 0.050 | 0.049 | 0.049 |

Plattenbelegung dil8\*dil2,75=dil22

|   | 1 | 2 | 3 | 4 | 5      | 6      | 7      | 8      | 9      | 10     | 11     | 12     |
|---|---|---|---|---|--------|--------|--------|--------|--------|--------|--------|--------|
| A |   |   |   |   | T6HN1  | T6HN1  | T6HN2  | T6HN2  | T6HN3  | T6HN3  | T6HN4  | T6HN4  |
| B |   |   |   |   | T6HS11 | T6HS11 | T6HS12 | T6HS12 | T6HS13 | T6HS13 | T6HS14 | T6HS14 |
| C |   |   |   |   | T6HS21 | T6HS21 | T6HS22 | T6HS22 | T6HS23 | T6HS23 | T6HS24 | T6HS24 |
| D |   |   |   |   |        |        |        |        |        |        |        |        |
| E |   |   |   |   |        |        |        |        |        |        |        |        |



|           |    |     |       |              |         |       |       |         |
|-----------|----|-----|-------|--------------|---------|-------|-------|---------|
| T7HN1     | T7 | A06 | 0.301 | 0.250        | 0.250   | 0.010 | 19.25 | 0.198   |
| T7HN2     | T7 | A07 | 0.404 | 0.353        | 0.353   | 0.015 | 19.25 | 0.292   |
| T7HN2     | T7 | A08 | 0.394 | 0.343        | 0.343   | 0.015 | 19.25 | 0.283   |
| T7HN3     | T7 | A09 | 0.647 | 0.596        | 0.596   | 0.027 | 2.75  | 0.073   |
| T7HN3     | T7 | A10 | 0.835 | 0.784        | 0.784   | 0.036 | 2.75  | 0.098   |
| T7HN4     | T7 | A11 | 0.282 | 0.231        | 0.231   | 0.009 | 2.75  | 0.026   |
| T7HN4     | T7 | A12 | 0.295 | 0.244        | 0.244   | 0.010 | 2.75  | 0.027   |
| 0         | T7 | B01 | 0     | kleiner LLOQ | #VALUE! |       | 1     | #VALUE! |
| 0         | T7 | B02 | 0     | kleiner LLOQ | #VALUE! |       | 1     | #VALUE! |
| 0         | T7 | B03 | 0     | kleiner LLOQ | #VALUE! |       | 1     | #VALUE! |
| 0         | T7 | B04 | 0     | kleiner LLOQ | #VALUE! |       | 1     | #VALUE! |
| T7HS11    | T7 | B05 | 0     | kleiner LLOQ | #VALUE! |       | 2.75  | #VALUE! |
| T7HS11    | T7 | B06 | 0     | kleiner LLOQ | #VALUE! |       | 2.75  | #VALUE! |
| T7HS12    | T7 | B07 | 0     | kleiner LLOQ | #VALUE! |       | 2.75  | #VALUE! |
| T7HS12    | T7 | B08 | 0     | kleiner LLOQ | #VALUE! |       | 2.75  | #VALUE! |
| T7HS13    | T7 | B09 | 0     | kleiner LLOQ | #VALUE! |       | 2.75  | #VALUE! |
| T7HS13    | T7 | B10 | 0     | kleiner LLOQ | #VALUE! |       | 2.75  | #VALUE! |
| T7HS14    | T7 | B11 | 0     | kleiner LLOQ | #VALUE! |       | 2.75  | #VALUE! |
| T7HS14    | T7 | B12 | 0     | kleiner LLOQ | #VALUE! |       | 2.75  | #VALUE! |
| 0         | T7 | C01 | 0     | kleiner LLOQ | #VALUE! |       | 1     | #VALUE! |
| 0         | T7 | C02 | 0     | kleiner LLOQ | #VALUE! |       | 1     | #VALUE! |
| 0         | T7 | C03 | 0     | kleiner LLOQ | #VALUE! |       | 1     | #VALUE! |
| 0         | T7 | C04 | 0     | kleiner LLOQ | #VALUE! |       | 1     | #VALUE! |
| T7HS21    | T7 | C05 | 0.522 | 0.471        | 0.471   | 0.021 | 8.25  | 0.171   |
| T7HS21    | T7 | C06 | 0.505 | 0.454        | 0.454   | 0.020 | 8.25  | 0.165   |
| T7HS22    | T7 | C07 | 0.598 | 0.547        | 0.547   | 0.024 | 8.25  | 0.201   |
| T7HS22    | T7 | C08 | 0.588 | 0.537        | 0.537   | 0.024 | 8.25  | 0.197   |
| T7HS23    | T7 | C09 | 0     | kleiner LLOQ | #VALUE! |       | 1     | #VALUE! |
| T7HS23    | T7 | C10 | 0     | kleiner LLOQ | #VALUE! |       | 1     | #VALUE! |
| T7HS24    | T7 | C11 | 0.219 | 0.168        | 0.168   | 0.006 | 2.75  | 0.018   |
| T7HS24    | T7 | C12 | 0.236 | 0.185        | 0.185   | 0.007 | 2.75  | 0.020   |
| 0         | T7 | D01 | 0     | kleiner LLOQ | #VALUE! |       | 1     | #VALUE! |
| 0         | T7 | D02 | 0     | kleiner LLOQ | #VALUE! |       | 1     | #VALUE! |
| 0         | T7 | D03 | 0     | kleiner LLOQ | #VALUE! |       | 1     | #VALUE! |
| 0         | T7 | D04 | 0     | kleiner LLOQ | #VALUE! |       | 1     | #VALUE! |
| 0         | T7 | D05 | 0     | kleiner LLOQ | #VALUE! |       | 1     | #VALUE! |
| 0         | T7 | D06 | 0     | kleiner LLOQ | #VALUE! |       | 1     | #VALUE! |
| 0         | T7 | D07 | 0     | kleiner LLOQ | #VALUE! |       | 1     | #VALUE! |
| 0         | T7 | D08 | 0     | kleiner LLOQ | #VALUE! |       | 1     | #VALUE! |
| 0         | T7 | D09 | 0     | kleiner LLOQ | #VALUE! |       | 1     | #VALUE! |
| 0         | T7 | D10 | 0     | kleiner LLOQ | #VALUE! |       | 1     | #VALUE! |
| 0         | T7 | D11 | 0     | kleiner LLOQ | #VALUE! |       | 1     | #VALUE! |
| 0         | T7 | D12 | 0     | kleiner LLOQ | #VALUE! |       | 1     | #VALUE! |
| 0         | T7 | E01 | 0     | kleiner LLOQ | #VALUE! |       | 1     | #VALUE! |
| 0         | T7 | E02 | 0     | kleiner LLOQ | #VALUE! |       | 1     | #VALUE! |
| 0         | T7 | E03 | 0     | kleiner LLOQ | #VALUE! |       | 1     | #VALUE! |
| 0         | T7 | E04 | 0     | kleiner LLOQ | #VALUE! |       | 1     | #VALUE! |
| 0         | T7 | E05 | 0     | kleiner LLOQ | #VALUE! |       | 1     | #VALUE! |
| 0         | T7 | E06 | 0     | kleiner LLOQ | #VALUE! |       | 1     | #VALUE! |
| 0         | T7 | E07 | 0     | kleiner LLOQ | #VALUE! |       | 1     | #VALUE! |
| 0         | T7 | E08 | 0     | kleiner LLOQ | #VALUE! |       | 1     | #VALUE! |
| 0         | T7 | E09 | 0     | kleiner LLOQ | #VALUE! |       | 1     | #VALUE! |
| 0         | T7 | E10 | 0     | kleiner LLOQ | #VALUE! |       | 1     | #VALUE! |
| 0         | T7 | E11 | 0     | kleiner LLOQ | #VALUE! |       | 1     | #VALUE! |
| 0         | T7 | E12 | 0     | kleiner LLOQ | #VALUE! |       | 1     | #VALUE! |
| 0         | T7 | F01 | 0     | kleiner LLOQ | #VALUE! |       | 1     | #VALUE! |
| 0         | T7 | F02 | 0     | kleiner LLOQ | #VALUE! |       | 1     | #VALUE! |
| 0         | T7 | F03 | 0     | kleiner LLOQ | #VALUE! |       | 1     | #VALUE! |
| 0         | T7 | F04 | 0     | kleiner LLOQ | #VALUE! |       | 1     | #VALUE! |
| 0         | T7 | F05 | 0     | kleiner LLOQ | #VALUE! |       | 1     | #VALUE! |
| 0         | T7 | F06 | 0     | kleiner LLOQ | #VALUE! |       | 1     | #VALUE! |
| 0         | T7 | F07 | 0     | kleiner LLOQ | #VALUE! |       | 1     | #VALUE! |
| 0         | T7 | F08 | 0     | kleiner LLOQ | #VALUE! |       | 1     | #VALUE! |
| 0         | T7 | F09 | 0     | kleiner LLOQ | #VALUE! |       | 1     | #VALUE! |
| 0         | T7 | F10 | 0     | kleiner LLOQ | #VALUE! |       | 1     | #VALUE! |
| 0         | T7 | F11 | 0     | kleiner LLOQ | #VALUE! |       | 1     | #VALUE! |
| 0         | T7 | F12 | 0     | kleiner LLOQ | #VALUE! |       | 1     | #VALUE! |
| 0         | T7 | G01 | 0     | kleiner LLOQ | #VALUE! |       | 1     | #VALUE! |
| 0         | T7 | G02 | 0     | kleiner LLOQ | #VALUE! |       | 1     | #VALUE! |
| 0         | T7 | G03 | 0     | kleiner LLOQ | #VALUE! |       | 1     | #VALUE! |
| 0         | T7 | G04 | 0     | kleiner LLOQ | #VALUE! |       | 1     | #VALUE! |
| 0         | T7 | G05 | 0     | kleiner LLOQ | #VALUE! |       | 1     | #VALUE! |
| 0         | T7 | G06 | 0     | kleiner LLOQ | #VALUE! |       | 1     | #VALUE! |
| Blank PEG | T7 | G07 | 0     | kleiner LLOQ | #VALUE! |       | 2.75  | #VALUE! |

Plate: T7

|   |   |   |   |   |       |       |       |       |       |       |       |       |
|---|---|---|---|---|-------|-------|-------|-------|-------|-------|-------|-------|
|   | 1 | 2 | 3 | 4 | 5     | 6     | 7     | 8     | 9     | 10    | 11    | 12    |
| A |   |   |   |   | 0.292 | 0.301 | 0.404 | 0.394 | 0.647 | 0.835 | 0.282 | 0.295 |
| B |   |   |   |   | 0.199 | 0.200 | 0.188 | 0.186 | 0.204 | 0.205 | 0.121 | 0.122 |
| C |   |   |   |   | 0.522 | 0.505 | 0.598 | 0.588 |       |       | 0.219 | 0.236 |
| D |   |   |   |   |       |       |       |       |       |       |       |       |
| E |   |   |   |   |       |       |       |       |       |       |       |       |
| F |   |   |   |   |       |       |       |       |       |       |       |       |
| G |   |   |   |   |       |       | 0.051 | 0.051 | 0.051 | 0.053 | 0.052 | 0.051 |
| H |   |   |   |   |       |       | 0.050 | 0.050 | 0.050 | 0.050 | 0.050 | 0.050 |

Plattenbelegung

|   |   |   |   |   |        |        |              |              |              |              |              |              |
|---|---|---|---|---|--------|--------|--------------|--------------|--------------|--------------|--------------|--------------|
|   | 1 | 2 | 3 | 4 | 5      | 6      | 7            | 8            | 9            | 10           | 11           | 12           |
| A |   |   |   |   | T7HN1  | T7HN1  | T7HN2        | T7HN2        | T7HN3        | T7HN3        | T7HN4        | T7HN4        |
| B |   |   |   |   | T7HS11 | T7HS11 | T7HS12       | T7HS12       | T7HS13       | T7HS13       | T7HS14       | T7HS14       |
| C |   |   |   |   | T7HS21 | T7HS21 | T7HS22       | T7HS22       | T7HS23       | T7HS23       | T7HS24       | T7HS24       |
| D |   |   |   |   |        |        |              |              |              |              |              |              |
| E |   |   |   |   |        |        |              |              |              |              |              |              |
| F |   |   |   |   |        |        |              |              |              |              |              |              |
| G |   |   |   |   |        |        | Blank PEG    | Blank PEG    | Blank PEG    | Blank PEG    | Blank PEG    | Blank PEG    |
| H |   |   |   |   |        |        | Blank no PEG | Blank no PEG | Blank no PEG | Blank no PEG | Blank no PEG | Blank no PEG |

dil3\*dil2,75=8,25  
dil7\*dil2,75=19,25

Comment:

Date \_\_\_\_\_ Operator \_\_\_\_\_

Date \_\_\_\_\_ Control \_\_\_\_\_

|              |    |     |   |   |              |         |      |         |
|--------------|----|-----|---|---|--------------|---------|------|---------|
| Blank PEG    | T7 | G08 | 0 | 0 | kleiner LLOQ | #VALUE! | 2.75 | #VALUE! |
| Blank PEG    | T7 | G09 | 0 | 0 | kleiner LLOQ | #VALUE! | 2.75 | #VALUE! |
| Blank PEG    | T7 | G10 | 0 | 0 | kleiner LLOQ | #VALUE! | 2.75 | #VALUE! |
| Blank PEG    | T7 | G11 | 0 | 0 | kleiner LLOQ | #VALUE! | 2.75 | #VALUE! |
| Blank PEG    | T7 | G12 | 0 | 0 | kleiner LLOQ | #VALUE! | 2.75 | #VALUE! |
| 0            | T7 | H01 | 0 | 0 | kleiner LLOQ | #VALUE! | 1    | #VALUE! |
| 0            | T7 | H02 | 0 | 0 | kleiner LLOQ | #VALUE! | 1    | #VALUE! |
| 0            | T7 | H03 | 0 | 0 | kleiner LLOQ | #VALUE! | 1    | #VALUE! |
| 0            | T7 | H04 | 0 | 0 | kleiner LLOQ | #VALUE! | 1    | #VALUE! |
| 0            | T7 | H05 | 0 | 0 | kleiner LLOQ | #VALUE! | 1    | #VALUE! |
| 0            | T7 | H06 | 0 | 0 | kleiner LLOQ | #VALUE! | 1    | #VALUE! |
| Blank no PEG | T7 | H07 | 0 | 0 | kleiner LLOQ | #VALUE! | 2.75 | #VALUE! |
| Blank no PEG | T7 | H08 | 0 | 0 | kleiner LLOQ | #VALUE! | 2.75 | #VALUE! |
| Blank no PEG | T7 | H09 | 0 | 0 | kleiner LLOQ | #VALUE! | 2.75 | #VALUE! |
| Blank no PEG | T7 | H10 | 0 | 0 | kleiner LLOQ | #VALUE! | 2.75 | #VALUE! |
| Blank no PEG | T7 | H11 | 0 | 0 | kleiner LLOQ | #VALUE! | 2.75 | #VALUE! |
| Blank no PEG | T7 | H12 | 0 | 0 | kleiner LLOQ | #VALUE! | 2.75 | #VALUE! |

|                    |              |                            |                         |                         |                              |
|--------------------|--------------|----------------------------|-------------------------|-------------------------|------------------------------|
| Project number     | F-120        | Apparatus                  | Wallac Victor           | Operator                | IsBa                         |
| GLP Study (Number) | n.a.         | Protocol (Instrument meth) | LDH test 2016           | Date of preparation     | 19-04-18                     |
| hot substance      | isotope      | n.a.                       | File name (results)     | IsBa_180419/20_LDH_full | Date of measurement          |
|                    | name         | n.a.                       | Kind of well plate      | 96 well                 | shaking time [min]           |
| cold substance     | ACB-ID       | n.a.                       | sample volume [µL]      | 100                     | stirring rate (Target) [rpm] |
|                    | Batch number | n.a.                       | Cocktail volume [µL]    | 175                     | Kind of measurement          |
| n.a.               | name         | LDH                        | ACB-ID of cocktail      | n.a.                    | Wave length [nm]             |
|                    | ACB-ID       | L23982R                    | Matrix                  | DMEM (from powder)+PE   | Remarks                      |
| n.a.               | Batch number | SLBK6345V                  | Blank description       | DMEM/PEG, H2O           | Remarks                      |
|                    | n.a.         | n.a.                       | Pipettes (No. / volume) | 50-200µl                | Remarks                      |
| n.a.               | n.a.         | Pipettes (No. / volume)    | n.a.                    | Remarks                 | n.a.                         |

Messdaten (diese Tabelle in Bericht übernehmen)

| Sample name * | concentration (theor.) * | measured data | measured data | measured data | mean measured | SD   | RSD  | Blank * | measured data after *<br>Blank subtraction | concentration (calc.) * | Deviation * | Residuen |
|---------------|--------------------------|---------------|---------------|---------------|---------------|------|------|---------|--------------------------------------------|-------------------------|-------------|----------|
|               | [µg/mL]                  | [AU]          | [AU]          | [AU]          | [AU]          | [AU] | [%]  | [AU]    |                                            | [µg/mL]                 | [%]         |          |
| KLP1          | 0.148                    | 1.579         | 1.652         | 1.627         | 1.62          | 0.03 | 1.87 | 0.047   | 1.568                                      | 0.148                   | -0.24       | 0.00     |
| KLP2          | 0.114                    | 1.357         | 1.443         | 1.372         | 1.39          | 0.04 | 2.70 | 0.054   | 1.340                                      | 0.110                   | -3.40       | 0.00     |
| KLP3          | 0.074                    | 1.272         | 1.193         | 1.228         | 1.23          | 0.03 | 2.63 | 0.051   | 1.180                                      | 0.084                   | 13.04       | 0.01     |
| KLP4          | 0.041                    | 0.959         | 0.972         | 0.883         | 0.94          | 0.04 | 4.19 | 0.051   | 0.887                                      | 0.035                   | -13.32      | -0.01    |
| KLP5          |                          |               |               |               |               |      |      | 0.052   |                                            |                         |             |          |
| KLP6          |                          |               |               |               |               |      |      | 0.051   |                                            |                         |             |          |
| KLP7          |                          |               |               |               |               |      |      |         |                                            |                         |             |          |
| KLP8          |                          |               |               |               |               |      |      |         |                                            |                         |             |          |

Statistical data

|                                              |                                          |                     |             |
|----------------------------------------------|------------------------------------------|---------------------|-------------|
| Geradensteigung                              | Slope                                    | m                   | 6.05        |
| Y-Achsenabschnitt                            | Y-intercept                              | b                   | 0.67        |
| Standardabw. Geradensteigung                 | SD-Slope                                 | S <sub>m</sub>      | 0.620291227 |
| Standardabw. Achsenabschnittes               | SD-Y-Intercept                           | S <sub>b</sub>      | 0.063894294 |
| Anzahl Messpunkte                            | number of measuring points               | n                   | 4           |
| Quadratsumme                                 | sum of squares                           | Q <sub>xx</sub>     | 0.006578604 |
| Bereichsmittle                               |                                          |                     | 0.094336926 |
| Freiheitsgrade                               | degree of freedom                        | f                   | 2           |
| Student-t-Faktor für (P = 95 %; f = n-2)     | Student-t-factor for (P = 95 %; f = n-2) | t                   | 4.303       |
| Vertrauensbereich Steig. (95 %) Obergrenze   |                                          | m + VB <sub>m</sub> | 8.722319627 |
| Vertrauensbereich Steig. (95 %) Untergrenze  |                                          | m - VB <sub>m</sub> | 3.384093228 |
| Vertrauensbereich Achsenabschnitt (95 %) Og. |                                          | b + VB <sub>b</sub> | 0.946914615 |
| Vertrauensbereich Achsenabschnitt (95 %) Ug. |                                          | b - VB <sub>b</sub> | 0.398761518 |
| Korrelationskoeffizient                      | correlation coefficient                  | r                   | 0.9897      |
| Bestimmtheitsmaß                             | determination coefficient                | r <sup>2</sup>      | 0.9794      |
| Reststandardabweichung                       |                                          | S <sub>0</sub>      | 0.050310948 |
| Summe Restquadrat                            |                                          | sd                  | 2.895683345 |
| Verfahrensstandardabw.                       |                                          | S <sub>0p</sub>     | 0.008311454 |
| Rel. Verfahrensstandardabw. %                |                                          | V <sub>0p</sub>     | 8.810393374 |

|                          |       |
|--------------------------|-------|
| mean Blank               | 0     |
| SD Blank                 | 0.00  |
| RSD Blank                | 3.79  |
| x <sup>2</sup> SD (LLOQ) | 0     |
| x <sup>2</sup> SD (LOD)  | 0     |
| LLOQ (AU)                | 0     |
| LOD (AU)                 | 0     |
| LLOQ                     | 1.568 |
| LLOQ (Lin)               | 0.887 |

Evaluation / Comment

LDH linearity valid with 7 standards, split in lin high and lin low, each with 4 standards and KLP4 common standard for both. R<sup>2</sup> 0,9981, deviations for both between -13.34% and +13.04%

Date \_\_\_\_\_ Operator \_\_\_\_\_ Date \_\_\_\_\_ Control \_\_\_\_\_



|               |  |         |               |
|---------------|--|---------|---------------|
| Formblatt-Nr. |  | Version |               |
| Titel         |  |         |               |
| Gültig ab     |  | Ablage  | Projektordner |

Figure 1 Linearity

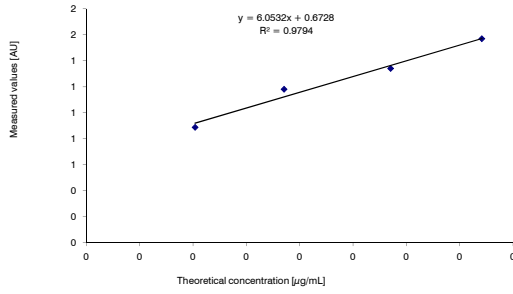

Figure 2 Method validation Residuen Plot

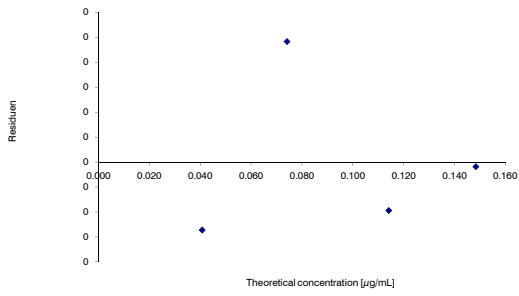

Evaluation / Comment

lin passed

Date

Operator

Date

Control

|                    |                        |                              |                                  |                              |                                       |                         |       |
|--------------------|------------------------|------------------------------|----------------------------------|------------------------------|---------------------------------------|-------------------------|-------|
| Project number     | F-120                  | Apparatus                    | Wallac Victor                    | Operator                     | IsBa                                  | LLOQ [AU]               | 0.887 |
| GLP Study (Number) | n.a.                   | Protocol (Instrument method) | LDH test 2016                    | Date of preparation          | 43209                                 | ULOQ [AU]               | 1.568 |
| hot substance      | Isotope n.a.           | File name (results)          | IsBa_180419/20_LDH_full_val_1/2/ | Date of measurement          | 43209                                 | Blank                   | 0.051 |
|                    | Name n.a.              | Kind of well plate           | 96 well                          | Shaking time [min]           | 30                                    |                         | n.a.  |
|                    | ACB-ID n.a.            | sample volume [µL]           | 100                              | Stirring rate (Target) [rpm] | 150                                   |                         | n.a.  |
|                    | Batch number n.a.      | Cocktail volume [µL]         | 175                              | Kind of measurement          | UV-vis                                | Pipettes (No. / volume) | n.a.  |
| cold substance     | Name LDH               | ACB-ID of cocktail           | n.a.                             | Wave length [nm]             | 450                                   | Pipettes (No. / volume) | n.a.  |
|                    | ACB-ID L23982R         | Matrix                       | DMEM (from powder)+PEG           | Remarks                      | Sui mitgemessen auf der Platte aber A | Pipettes (No. / volume) | n.a.  |
|                    | Batch number SLBK6345V | Blank description            | DMEM/PEG, H2O                    | Remarks                      | n.a.                                  | Remarks                 | n.a.  |

| Sample name | Plate | Position | [AU]  | [AU]-Blank | Rating       | [µg/mL] | Dilution factor | [µg/mL] |
|-------------|-------|----------|-------|------------|--------------|---------|-----------------|---------|
| 0           | T4    | A01      | 0     | 0          | kleiner LLOQ | #VALUE! | 1               | #VALUE! |
| 0           | T4    | A02      | 0     | 0          | kleiner LLOQ | #VALUE! | 1               | #VALUE! |
| 0           | T4    | A03      | 0     | 0          | kleiner LLOQ | #VALUE! | 1               | #VALUE! |
| 0           | T4    | A04      | 0     | 0          | kleiner LLOQ | #VALUE! | 1               | #VALUE! |
| T4HN1       | T4    | A05      | 1.128 | 1.077      | 0            | 0.067   | 2.75            | 0.184   |
| T4HN1       | T4    | A06      | 1.099 | 1.048      | 0            | 0.062   | 2.75            | 0.171   |
| T4HN2       | T4    | A07      | 1.007 | 0.956      | 0            | 0.047   | 24.75           | 1.158   |
| T4HN2       | T4    | A08      | 0.989 | 0.918      | 0            | 0.040   | 24.75           | 1.002   |
| T4HN3       | T4    | A09      | 0.000 | -0.051     | kleiner LLOQ | #VALUE! | 1               | #VALUE! |
| T4HN3       | T4    | A10      | 0.000 | -0.051     | kleiner LLOQ | #VALUE! | 1               | #VALUE! |
| T4HN4       | T4    | A11      | 0     | 0          | kleiner LLOQ | #VALUE! | 1               | #VALUE! |
| T4HN4       | T4    | A12      | 0     | 0          | kleiner LLOQ | #VALUE! | 1               | #VALUE! |
| 0           | T4    | B01      | 0     | 0          | kleiner LLOQ | #VALUE! | 1               | #VALUE! |
| 0           | T4    | B02      | 0     | 0          | kleiner LLOQ | #VALUE! | 1               | #VALUE! |
| 0           | T4    | B03      | 0     | 0          | kleiner LLOQ | #VALUE! | 1               | #VALUE! |
| 0           | T4    | B04      | 0     | 0          | kleiner LLOQ | #VALUE! | 1               | #VALUE! |
| T4HS11      | T4    | B05      | 1.143 | 1.093      | 0            | 0.069   | 24.75           | 1.716   |
| T4HS11      | T4    | B06      | 0     | 0          | kleiner LLOQ | #VALUE! | 1               | #VALUE! |
| T4HS12      | T4    | B07      | 0     | 0          | kleiner LLOQ | #VALUE! | 1               | #VALUE! |
| T4HS12      | T4    | B08      | 0     | 0          | kleiner LLOQ | #VALUE! | 1               | #VALUE! |
| T4HS13      | T4    | B09      | 0     | 0          | kleiner LLOQ | #VALUE! | 1               | #VALUE! |
| T4HS13      | T4    | B10      | 0     | 0          | kleiner LLOQ | #VALUE! | 1               | #VALUE! |
| T4HS14      | T4    | B11      | 0     | 0          | kleiner LLOQ | #VALUE! | 1               | #VALUE! |
| T4HS14      | T4    | B12      | 0     | 0          | kleiner LLOQ | #VALUE! | 1               | #VALUE! |
| 0           | T4    | C01      | 0     | 0          | kleiner LLOQ | #VALUE! | 1               | #VALUE! |
| 0           | T4    | C02      | 0     | 0          | kleiner LLOQ | #VALUE! | 1               | #VALUE! |
| 0           | T4    | C03      | 0     | 0          | kleiner LLOQ | #VALUE! | 1               | #VALUE! |
| 0           | T4    | C04      | 0     | 0          | kleiner LLOQ | #VALUE! | 1               | #VALUE! |
| T4HS21      | T4    | C05      | 0     | 0          | kleiner LLOQ | #VALUE! | 1               | #VALUE! |
| T4HS21      | T4    | C06      | 0     | 0          | kleiner LLOQ | #VALUE! | 1               | #VALUE! |
| T4HS22      | T4    | C07      | 0     | 0          | kleiner LLOQ | #VALUE! | 1               | #VALUE! |
| T4HS22      | T4    | C08      | 0     | 0          | kleiner LLOQ | #VALUE! | 1               | #VALUE! |
| T4HS23      | T4    | C09      | 0     | 0          | kleiner LLOQ | #VALUE! | 1               | #VALUE! |
| T4HS23      | T4    | C10      | 0     | 0          | kleiner LLOQ | #VALUE! | 1               | #VALUE! |
| T4HS24      | T4    | C11      | 0     | 0          | kleiner LLOQ | #VALUE! | 1               | #VALUE! |
| T4HS24      | T4    | C12      | 0     | 0          | kleiner LLOQ | #VALUE! | 1               | #VALUE! |
| 0           | T4    | D01      | 0     | 0          | kleiner LLOQ | #VALUE! | 1               | #VALUE! |
| 0           | T4    | D02      | 0     | 0          | kleiner LLOQ | #VALUE! | 1               | #VALUE! |
| 0           | T4    | D03      | 0     | 0          | kleiner LLOQ | #VALUE! | 1               | #VALUE! |
| 0           | T4    | D04      | 0     | 0          | kleiner LLOQ | #VALUE! | 1               | #VALUE! |
| 0           | T4    | D05      | 0     | 0          | kleiner LLOQ | #VALUE! | 1               | #VALUE! |
| 0           | T4    | D06      | 0     | 0          | kleiner LLOQ | #VALUE! | 1               | #VALUE! |
| 0           | T4    | D07      | 0     | 0          | kleiner LLOQ | #VALUE! | 1               | #VALUE! |
| 0           | T4    | D08      | 0     | 0          | kleiner LLOQ | #VALUE! | 1               | #VALUE! |
| 0           | T4    | D09      | 0     | 0          | kleiner LLOQ | #VALUE! | 1               | #VALUE! |
| 0           | T4    | D10      | 0     | 0          | kleiner LLOQ | #VALUE! | 1               | #VALUE! |
| 0           | T4    | D11      | 0     | 0          | kleiner LLOQ | #VALUE! | 1               | #VALUE! |
| 0           | T4    | D12      | 0     | 0          | kleiner LLOQ | #VALUE! | 1               | #VALUE! |

Plate: T4

|   |   |   |   |   |       |       |       |       |       |       |       |       |
|---|---|---|---|---|-------|-------|-------|-------|-------|-------|-------|-------|
|   | 1 | 2 | 3 | 4 | 5     | 6     | 7     | 8     | 9     | 10    | 11    | 12    |
| A |   |   |   |   | 1.128 | 1.099 | 1.007 | 0.989 |       |       |       |       |
| B |   |   |   |   | 1.143 |       |       |       |       |       |       |       |
| C |   |   |   |   |       |       |       |       |       |       |       |       |
| D |   |   |   |   |       |       |       |       |       |       |       |       |
| E |   |   |   |   |       |       |       |       |       |       |       |       |
| F |   |   |   |   |       |       |       |       |       |       |       |       |
| G |   |   |   |   |       |       |       | 0.052 | 0.054 | 0.052 | 0.052 | 0.051 |
| H |   |   |   |   |       |       |       | 0.050 | 0.050 | 0.053 | 0.050 | 0.050 |

Plattenbelegung

|   |   |   |   |   |   |        |        |              |              |              |              |              |
|---|---|---|---|---|---|--------|--------|--------------|--------------|--------------|--------------|--------------|
|   | 1 | 2 | 3 | 4 | 5 | 6      | 7      | 8            | 9            | 10           | 11           | 12           |
| A |   |   |   |   |   | T4HN1  | T4HN1  | T4HN2        | T4HN2        | T4HN3        | T4HN3        | T4HN4        |
| B |   |   |   |   |   | T4HS11 | T4HS11 | T4HS12       | T4HS12       | T4HS13       | T4HS13       | T4HS14       |
| C |   |   |   |   |   | T4HS21 | T4HS21 | T4HS22       | T4HS22       | T4HS23       | T4HS23       | T4HS24       |
| D |   |   |   |   |   |        |        |              |              |              |              |              |
| E |   |   |   |   |   |        |        |              |              |              |              |              |
| F |   |   |   |   |   |        |        |              |              |              |              |              |
| G |   |   |   |   |   |        |        | Blank PEG    | Blank PEG    | Blank PEG    | Blank PEG    | Blank PEG    |
| H |   |   |   |   |   |        |        | Blank no PEG | Blank no PEG | Blank no PEG | Blank no PEG | Blank no PEG |

dil 9\*dil2.75=dil.24.75

Comment:

Samples aufgeteilt in lin high und low;niedriger konzentrierte Samples bei lin low zu finden.

Date Operator Date Control

|              |    |     |       |        |              |         |      |         |
|--------------|----|-----|-------|--------|--------------|---------|------|---------|
| 0            | T4 | E01 | 0     | 0      | kleiner LLOQ | #VALUE! | 1    | #VALUE! |
| 0            | T4 | E02 | 0     | 0      | kleiner LLOQ | #VALUE! | 1    | #VALUE! |
| 0            | T4 | E03 | 0     | 0      | kleiner LLOQ | #VALUE! | 1    | #VALUE! |
| 0            | T4 | E04 | 0     | 0      | kleiner LLOQ | #VALUE! | 1    | #VALUE! |
| 0            | T4 | E05 | 0     | 0      | kleiner LLOQ | #VALUE! | 1    | #VALUE! |
| 0            | T4 | E06 | 0     | 0      | kleiner LLOQ | #VALUE! | 1    | #VALUE! |
| 0            | T4 | E07 | 0     | 0      | kleiner LLOQ | #VALUE! | 1    | #VALUE! |
| 0            | T4 | E08 | 0     | 0      | kleiner LLOQ | #VALUE! | 1    | #VALUE! |
| 0            | T4 | E09 | 0     | 0      | kleiner LLOQ | #VALUE! | 1    | #VALUE! |
| 0            | T4 | E10 | 0     | 0      | kleiner LLOQ | #VALUE! | 1    | #VALUE! |
| 0            | T4 | E11 | 0     | 0      | kleiner LLOQ | #VALUE! | 1    | #VALUE! |
| 0            | T4 | E12 | 0     | 0      | kleiner LLOQ | #VALUE! | 1    | #VALUE! |
| 0            | T4 | F01 | 0     | 0      | kleiner LLOQ | #VALUE! | 1    | #VALUE! |
| 0            | T4 | F02 | 0     | 0      | kleiner LLOQ | #VALUE! | 1    | #VALUE! |
| 0            | T4 | F03 | 0     | 0      | kleiner LLOQ | #VALUE! | 1    | #VALUE! |
| 0            | T4 | F04 | 0     | 0      | kleiner LLOQ | #VALUE! | 1    | #VALUE! |
| 0            | T4 | F05 | 0     | 0      | kleiner LLOQ | #VALUE! | 1    | #VALUE! |
| 0            | T4 | F06 | 0     | 0      | kleiner LLOQ | #VALUE! | 1    | #VALUE! |
| 0            | T4 | F07 | 0     | 0      | kleiner LLOQ | #VALUE! | 1    | #VALUE! |
| 0            | T4 | F08 | 0     | 0      | kleiner LLOQ | #VALUE! | 1    | #VALUE! |
| 0            | T4 | F09 | 0     | 0      | kleiner LLOQ | #VALUE! | 1    | #VALUE! |
| 0            | T4 | F10 | 0     | 0      | kleiner LLOQ | #VALUE! | 1    | #VALUE! |
| 0            | T4 | F11 | 0     | 0      | kleiner LLOQ | #VALUE! | 1    | #VALUE! |
| 0            | T4 | F12 | 0     | 0      | kleiner LLOQ | #VALUE! | 1    | #VALUE! |
| 0            | T4 | G01 | 0     | 0      | kleiner LLOQ | #VALUE! | 1    | #VALUE! |
| 0            | T4 | G02 | 0     | 0      | kleiner LLOQ | #VALUE! | 1    | #VALUE! |
| 0            | T4 | G03 | 0     | 0      | kleiner LLOQ | #VALUE! | 1    | #VALUE! |
| 0            | T4 | G04 | 0     | 0      | kleiner LLOQ | #VALUE! | 1    | #VALUE! |
| 0            | T4 | G05 | 0     | 0      | kleiner LLOQ | #VALUE! | 1    | #VALUE! |
| 0            | T4 | G06 | 0     | 0      | kleiner LLOQ | #VALUE! | 1    | #VALUE! |
| Blank PEG    | T4 | G07 | 0.052 | 0.001  | kleiner LLOQ | #VALUE! | 2.75 | #VALUE! |
| Blank PEG    | T4 | G08 | 0.054 | 0.003  | kleiner LLOQ | #VALUE! | 2.75 | #VALUE! |
| Blank PEG    | T4 | G09 | 0.052 | 0.001  | kleiner LLOQ | #VALUE! | 2.75 | #VALUE! |
| Blank PEG    | T4 | G10 | 0.052 | 0.001  | kleiner LLOQ | #VALUE! | 2.75 | #VALUE! |
| Blank PEG    | T4 | G11 | 0.052 | 0.001  | kleiner LLOQ | #VALUE! | 2.75 | #VALUE! |
| Blank PEG    | T4 | G12 | 0.051 | 0.000  | kleiner LLOQ | #VALUE! | 2.75 | #VALUE! |
| 0            | T4 | H01 | 0     | 0      | kleiner LLOQ | #VALUE! | 1    | #VALUE! |
| 0            | T4 | H02 | 0     | 0      | kleiner LLOQ | #VALUE! | 1    | #VALUE! |
| 0            | T4 | H03 | 0     | 0      | kleiner LLOQ | #VALUE! | 1    | #VALUE! |
| 0            | T4 | H04 | 0     | 0      | kleiner LLOQ | #VALUE! | 1    | #VALUE! |
| 0            | T4 | H05 | 0     | 0      | kleiner LLOQ | #VALUE! | 1    | #VALUE! |
| 0            | T4 | H06 | 0     | 0      | kleiner LLOQ | #VALUE! | 1    | #VALUE! |
| Blank no PEG | T4 | H07 | 0.050 | -0.001 | kleiner LLOQ | #VALUE! | 2.75 | #VALUE! |
| Blank no PEG | T4 | H08 | 0.050 | -0.001 | kleiner LLOQ | #VALUE! | 2.75 | #VALUE! |
| Blank no PEG | T4 | H09 | 0.053 | 0.002  | kleiner LLOQ | #VALUE! | 2.75 | #VALUE! |
| Blank no PEG | T4 | H10 | 0.050 | -0.001 | kleiner LLOQ | #VALUE! | 2.75 | #VALUE! |
| Blank no PEG | T4 | H11 | 0.051 | 0.000  | kleiner LLOQ | #VALUE! | 2.75 | #VALUE! |
| Blank no PEG | T4 | H12 | 0.050 | -0.001 | kleiner LLOQ | #VALUE! | 2.75 | #VALUE! |

|        |    |     |       |       |              |         |      |         |
|--------|----|-----|-------|-------|--------------|---------|------|---------|
| 0      | T5 | A01 | 0     | 0     | kleiner LLOQ | #VALUE! | 1    | #VALUE! |
| 0      | T5 | A02 | 0     | 0     | kleiner LLOQ | #VALUE! | 1    | #VALUE! |
| 0      | T5 | A03 | 0     | 0     | kleiner LLOQ | #VALUE! | 1    | #VALUE! |
| 0      | T5 | A04 | 0     | 0     | kleiner LLOQ | #VALUE! | 1    | #VALUE! |
| T5HN1  | T5 | A05 | 0     | 0     | kleiner LLOQ | #VALUE! | 1    | #VALUE! |
| T5HN1  | T5 | A06 | 0     | 0     | kleiner LLOQ | #VALUE! | 1    | #VALUE! |
| T5HN2  | T5 | A07 | 1.096 | 1.045 | 1.045        | 0.061   | 27.5 | 1.690   |
| T5HN2  | T5 | A08 | 1.121 | 1.070 | 1.070        | 0.066   | 27.5 | 1.805   |
| T5HN3  | T5 | A09 | 0.981 | 0.930 | 0.930        | 0.042   | 27.5 | 1.167   |
| T5HN3  | T5 | A10 | 0.973 | 0.922 | 0.922        | 0.041   | 27.5 | 1.133   |
| T5HN4  | T5 | A11 | 0     | 0     | kleiner LLOQ | #VALUE! | 1    | #VALUE! |
| T5HN4  | T5 | A12 | 0     | 0     | kleiner LLOQ | #VALUE! | 1    | #VALUE! |
| 0      | T5 | B01 | 0     | 0     | kleiner LLOQ | #VALUE! | 1    | #VALUE! |
| 0      | T5 | B02 | 0     | 0     | kleiner LLOQ | #VALUE! | 1    | #VALUE! |
| 0      | T5 | B03 | 0     | 0     | kleiner LLOQ | #VALUE! | 1    | #VALUE! |
| 0      | T5 | B04 | 0     | 0     | kleiner LLOQ | #VALUE! | 1    | #VALUE! |
| T5HS11 | T5 | B05 | 0     | 0     | kleiner LLOQ | #VALUE! | 1    | #VALUE! |
| T5HS11 | T5 | B06 | 0     | 0     | kleiner LLOQ | #VALUE! | 1    | #VALUE! |
| T5HS12 | T5 | B07 | 0     | 0     | kleiner LLOQ | #VALUE! | 1    | #VALUE! |
| T5HS12 | T5 | B08 | 0     | 0     | kleiner LLOQ | #VALUE! | 1    | #VALUE! |
| T5HS13 | T5 | B09 | 0     | 0     | kleiner LLOQ | #VALUE! | 1    | #VALUE! |
| T5HS13 | T5 | B10 | 0     | 0     | kleiner LLOQ | #VALUE! | 1    | #VALUE! |
| T5HS14 | T5 | B11 | 0     | 0     | kleiner LLOQ | #VALUE! | 1    | #VALUE! |
| T5HS14 | T5 | B12 | 0     | 0     | kleiner LLOQ | #VALUE! | 1    | #VALUE! |
| 0      | T5 | C01 | 0     | 0     | kleiner LLOQ | #VALUE! | 1    | #VALUE! |
| 0      | T5 | C02 | 0     | 0     | kleiner LLOQ | #VALUE! | 1    | #VALUE! |
| 0      | T5 | C03 | 0     | 0     | kleiner LLOQ | #VALUE! | 1    | #VALUE! |
| 0      | T5 | C04 | 0     | 0     | kleiner LLOQ | #VALUE! | 1    | #VALUE! |
| T5HS21 | T5 | C05 | 0     | 0     | kleiner LLOQ | #VALUE! | 1    | #VALUE! |
| T5HS21 | T5 | C06 | 0     | 0     | kleiner LLOQ | #VALUE! | 1    | #VALUE! |
| T5HS22 | T5 | C07 | 0     | 0     | kleiner LLOQ | #VALUE! | 1    | #VALUE! |
| T5HS22 | T5 | C08 | 0     | 0     | kleiner LLOQ | #VALUE! | 1    | #VALUE! |
| T5HS23 | T5 | C09 | 1.430 | 1.379 | 1.379        | 0.117   | 2.75 | 0.321   |
| T5HS23 | T5 | C10 | 1.378 | 1.327 | 1.327        | 0.108   | 2.75 | 0.297   |
| T5HS24 | T5 | C11 | 0     | 0     | kleiner LLOQ | #VALUE! | 1    | #VALUE! |
| T5HS24 | T5 | C12 | 0     | 0     | kleiner LLOQ | #VALUE! | 1    | #VALUE! |
| 0      | T5 | D01 | 0     | 0     | kleiner LLOQ | #VALUE! | 1    | #VALUE! |
| 0      | T5 | D02 | 0     | 0     | kleiner LLOQ | #VALUE! | 1    | #VALUE! |
| 0      | T5 | D03 | 0     | 0     | kleiner LLOQ | #VALUE! | 1    | #VALUE! |
| 0      | T5 | D04 | 0     | 0     | kleiner LLOQ | #VALUE! | 1    | #VALUE! |
| 0      | T5 | D05 | 0     | 0     | kleiner LLOQ | #VALUE! | 1    | #VALUE! |
| 0      | T5 | D06 | 0     | 0     | kleiner LLOQ | #VALUE! | 1    | #VALUE! |
| 0      | T5 | D07 | 0     | 0     | kleiner LLOQ | #VALUE! | 1    | #VALUE! |
| 0      | T5 | D08 | 0     | 0     | kleiner LLOQ | #VALUE! | 1    | #VALUE! |
| 0      | T5 | D09 | 0     | 0     | kleiner LLOQ | #VALUE! | 1    | #VALUE! |
| 0      | T5 | D10 | 0     | 0     | kleiner LLOQ | #VALUE! | 1    | #VALUE! |
| 0      | T5 | D11 | 0     | 0     | kleiner LLOQ | #VALUE! | 1    | #VALUE! |
| 0      | T5 | D12 | 0     | 0     | kleiner LLOQ | #VALUE! | 1    | #VALUE! |

Plate: T5

|   |   |   |   |   |   |   |       |       |       |       |       |       |
|---|---|---|---|---|---|---|-------|-------|-------|-------|-------|-------|
|   | 1 | 2 | 3 | 4 | 5 | 6 | 7     | 8     | 9     | 10    | 11    | 12    |
| A |   |   |   |   |   |   | 1.096 | 1.121 | 0.981 | 0.973 |       |       |
| B |   |   |   |   |   |   |       |       |       |       |       |       |
| C |   |   |   |   |   |   |       |       | 1.430 | 1.378 |       |       |
| D |   |   |   |   |   |   |       |       |       |       |       |       |
| E |   |   |   |   |   |   |       |       |       |       |       |       |
| F |   |   |   |   |   |   |       |       |       |       |       |       |
| G |   |   |   |   |   |   | 0.053 | 0.053 | 0.054 | 0.053 | 0.053 | 0.052 |
| H |   |   |   |   |   |   | 0.101 | 0.056 | 0.052 | 0.050 | 0.054 | 0.053 |

Plattenbelegung

|   |   |   |   |   |        |        |        |        |        |        |        |        |
|---|---|---|---|---|--------|--------|--------|--------|--------|--------|--------|--------|
|   | 1 | 2 | 3 | 4 | 5      | 6      | 7      | 8      | 9      | 10     | 11     | 12     |
| A |   |   |   |   | T5HN1  | T5HN1  | T5HN2  | T5HN2  | T5HN3  | T5HN3  | T5HN4  | T5HN4  |
| B |   |   |   |   | T5HS11 | T5HS11 | T5HS12 | T5HS12 | T5HS13 | T5HS13 | T5HS14 | T5HS14 |
| C |   |   |   |   | T5HS21 | T5HS21 | T5HS22 | T5HS22 | T5HS23 | T5HS23 | T5HS24 | T5HS24 |
| D |   |   |   |   |        |        |        |        |        |        |        |        |
| E |   |   |   |   |        |        |        |        |        |        |        |        |
| F |   |   |   |   |        |        |        |        |        |        |        |        |
| G |   |   |   |   |        |        |        |        |        |        |        |        |
| H |   |   |   |   |        |        |        |        |        |        |        |        |

dil10\*dil2,75=dil.27.5

Comment:

Date Operator

Date Control

|              |    |     |   |              |         |      |         |
|--------------|----|-----|---|--------------|---------|------|---------|
| 0            | T5 | E01 | 0 | kleiner LLOQ | #VALUE! | 1    | #VALUE! |
| 0            | T5 | E02 | 0 | kleiner LLOQ | #VALUE! | 1    | #VALUE! |
| 0            | T5 | E03 | 0 | kleiner LLOQ | #VALUE! | 1    | #VALUE! |
| 0            | T5 | E04 | 0 | kleiner LLOQ | #VALUE! | 1    | #VALUE! |
| 0            | T5 | E05 | 0 | kleiner LLOQ | #VALUE! | 1    | #VALUE! |
| 0            | T5 | E06 | 0 | kleiner LLOQ | #VALUE! | 1    | #VALUE! |
| 0            | T5 | E07 | 0 | kleiner LLOQ | #VALUE! | 1    | #VALUE! |
| 0            | T5 | E08 | 0 | kleiner LLOQ | #VALUE! | 1    | #VALUE! |
| 0            | T5 | E09 | 0 | kleiner LLOQ | #VALUE! | 1    | #VALUE! |
| 0            | T5 | E10 | 0 | kleiner LLOQ | #VALUE! | 1    | #VALUE! |
| 0            | T5 | E11 | 0 | kleiner LLOQ | #VALUE! | 1    | #VALUE! |
| 0            | T5 | E12 | 0 | kleiner LLOQ | #VALUE! | 1    | #VALUE! |
| 0            | T5 | F01 | 0 | kleiner LLOQ | #VALUE! | 1    | #VALUE! |
| 0            | T5 | F02 | 0 | kleiner LLOQ | #VALUE! | 1    | #VALUE! |
| 0            | T5 | F03 | 0 | kleiner LLOQ | #VALUE! | 1    | #VALUE! |
| 0            | T5 | F04 | 0 | kleiner LLOQ | #VALUE! | 1    | #VALUE! |
| 0            | T5 | F05 | 0 | kleiner LLOQ | #VALUE! | 1    | #VALUE! |
| 0            | T5 | F06 | 0 | kleiner LLOQ | #VALUE! | 1    | #VALUE! |
| 0            | T5 | F07 | 0 | kleiner LLOQ | #VALUE! | 1    | #VALUE! |
| 0            | T5 | F08 | 0 | kleiner LLOQ | #VALUE! | 1    | #VALUE! |
| 0            | T5 | F09 | 0 | kleiner LLOQ | #VALUE! | 1    | #VALUE! |
| 0            | T5 | F10 | 0 | kleiner LLOQ | #VALUE! | 1    | #VALUE! |
| 0            | T5 | F11 | 0 | kleiner LLOQ | #VALUE! | 1    | #VALUE! |
| 0            | T5 | F12 | 0 | kleiner LLOQ | #VALUE! | 1    | #VALUE! |
| 0            | T5 | G01 | 0 | kleiner LLOQ | #VALUE! | 1    | #VALUE! |
| 0            | T5 | G02 | 0 | kleiner LLOQ | #VALUE! | 1    | #VALUE! |
| 0            | T5 | G03 | 0 | kleiner LLOQ | #VALUE! | 1    | #VALUE! |
| 0            | T5 | G04 | 0 | kleiner LLOQ | #VALUE! | 1    | #VALUE! |
| 0            | T5 | G05 | 0 | kleiner LLOQ | #VALUE! | 1    | #VALUE! |
| 0            | T5 | G06 | 0 | kleiner LLOQ | #VALUE! | 1    | #VALUE! |
| Blank PEG    | T5 | G07 | 0 | kleiner LLOQ | #VALUE! | 2.75 | #VALUE! |
| Blank PEG    | T5 | G08 | 0 | kleiner LLOQ | #VALUE! | 2.75 | #VALUE! |
| Blank PEG    | T5 | G09 | 0 | kleiner LLOQ | #VALUE! | 2.75 | #VALUE! |
| Blank PEG    | T5 | G10 | 0 | kleiner LLOQ | #VALUE! | 2.75 | #VALUE! |
| Blank PEG    | T5 | G11 | 0 | kleiner LLOQ | #VALUE! | 2.75 | #VALUE! |
| Blank PEG    | T5 | G12 | 0 | kleiner LLOQ | #VALUE! | 2.75 | #VALUE! |
| 0            | T5 | H01 | 0 | kleiner LLOQ | #VALUE! | 1    | #VALUE! |
| 0            | T5 | H02 | 0 | kleiner LLOQ | #VALUE! | 1    | #VALUE! |
| 0            | T5 | H03 | 0 | kleiner LLOQ | #VALUE! | 1    | #VALUE! |
| 0            | T5 | H04 | 0 | kleiner LLOQ | #VALUE! | 1    | #VALUE! |
| 0            | T5 | H05 | 0 | kleiner LLOQ | #VALUE! | 1    | #VALUE! |
| 0            | T5 | H06 | 0 | kleiner LLOQ | #VALUE! | 1    | #VALUE! |
| Blank no PEG | T5 | H07 | 0 | kleiner LLOQ | #VALUE! | 2.75 | #VALUE! |
| Blank no PEG | T5 | H08 | 0 | kleiner LLOQ | #VALUE! | 2.75 | #VALUE! |
| Blank no PEG | T5 | H09 | 0 | kleiner LLOQ | #VALUE! | 2.75 | #VALUE! |
| Blank no PEG | T5 | H10 | 0 | kleiner LLOQ | #VALUE! | 2.75 | #VALUE! |
| Blank no PEG | T5 | H11 | 0 | kleiner LLOQ | #VALUE! | 2.75 | #VALUE! |
| Blank no PEG | T5 | H12 | 0 | kleiner LLOQ | #VALUE! | 2.75 | #VALUE! |
| 0            | T6 | A01 | 0 | kleiner LLOQ | #VALUE! | 1    | #VALUE! |
| 0            | T6 | A02 | 0 | kleiner LLOQ | #VALUE! | 1    | #VALUE! |
| 0            | T6 | A03 | 0 | kleiner LLOQ | #VALUE! | 1    | #VALUE! |
| 0            | T6 | A04 | 0 | kleiner LLOQ | #VALUE! | 1    | #VALUE! |
| T6HN1        | T6 | A05 | 0 | kleiner LLOQ | #VALUE! | 1    | #VALUE! |
| T6HN1        | T6 | A06 | 0 | kleiner LLOQ | #VALUE! | 1    | #VALUE! |
| T6HN2        | T6 | A07 | 0 | kleiner LLOQ | #VALUE! | 1    | #VALUE! |
| T6HN2        | T6 | A08 | 0 | kleiner LLOQ | #VALUE! | 1    | #VALUE! |
| T6HN3        | T6 | A09 | 0 | kleiner LLOQ | #VALUE! | 1    | #VALUE! |
| T6HN3        | T6 | A10 | 0 | kleiner LLOQ | #VALUE! | 1    | #VALUE! |
| T6HN4        | T6 | A11 | 0 | kleiner LLOQ | #VALUE! | 1    | #VALUE! |
| T6HN4        | T6 | A12 | 0 | kleiner LLOQ | #VALUE! | 1    | #VALUE! |
| 0            | T6 | B01 | 0 | kleiner LLOQ | #VALUE! | 1    | #VALUE! |
| 0            | T6 | B02 | 0 | kleiner LLOQ | #VALUE! | 1    | #VALUE! |
| 0            | T6 | B03 | 0 | kleiner LLOQ | #VALUE! | 1    | #VALUE! |
| 0            | T6 | B04 | 0 | kleiner LLOQ | #VALUE! | 1    | #VALUE! |
| T6HS11       | T6 | B05 | 0 | kleiner LLOQ | #VALUE! | 1    | #VALUE! |
| T6HS11       | T6 | B06 | 0 | kleiner LLOQ | #VALUE! | 1    | #VALUE! |
| T6HS12       | T6 | B07 | 0 | kleiner LLOQ | #VALUE! | 1    | #VALUE! |
| T6HS12       | T6 | B08 | 0 | kleiner LLOQ | #VALUE! | 1    | #VALUE! |
| T6HS13       | T6 | B09 | 0 | kleiner LLOQ | #VALUE! | 1    | #VALUE! |
| T6HS13       | T6 | B10 | 0 | kleiner LLOQ | #VALUE! | 1    | #VALUE! |
| T6HS14       | T6 | B11 | 0 | kleiner LLOQ | #VALUE! | 1    | #VALUE! |
| T6HS14       | T6 | B12 | 0 | kleiner LLOQ | #VALUE! | 1    | #VALUE! |
| 0            | T6 | C01 | 0 | kleiner LLOQ | #VALUE! | 1    | #VALUE! |

Plate: T6

|   | 1 | 2 | 3 | 4 | 5     | 6     | 7     | 8     | 9     | 10    | 11    | 12    |
|---|---|---|---|---|-------|-------|-------|-------|-------|-------|-------|-------|
| A |   |   |   |   |       |       |       |       |       |       |       |       |
| B |   |   |   |   |       |       |       |       |       |       |       |       |
| C |   |   |   |   | 1.181 | 1.211 | 1.314 | 1.355 | 1.060 | 1.076 |       |       |
| D |   |   |   |   |       |       |       |       |       |       |       |       |
| E |   |   |   |   |       |       |       |       |       |       |       |       |
| F |   |   |   |   |       |       |       |       |       |       |       |       |
| G |   |   |   |   |       |       | 0.051 | 0.050 | 0.050 | 0.052 | 0.051 | 0.051 |
| H |   |   |   |   |       |       | 0.050 | 0.050 | 0.050 | 0.050 | 0.049 | 0.049 |

| Plattenbelegung |   |   |   |   |        |        |        |        |        |        |        |        |
|-----------------|---|---|---|---|--------|--------|--------|--------|--------|--------|--------|--------|
|                 | 1 | 2 | 3 | 4 | 5      | 6      | 7      | 8      | 9      | 10     | 11     | 12     |
| A               |   |   |   |   | T6HN1  | T6HN1  | T6HN2  | T6HN2  | T6HN3  | T6HN3  | T6HN4  | T6HN4  |
| B               |   |   |   |   | T6HS11 | T6HS11 | T6HS12 | T6HS12 | T6HS13 | T6HS13 | T6HS14 | T6HS14 |
| C               |   |   |   |   | T6HS21 | T6HS21 | T6HS22 | T6HS22 | T6HS23 | T6HS23 | T6HS24 | T6HS24 |
| D               |   |   |   |   |        |        |        |        |        |        |        |        |
| E               |   |   |   |   |        |        |        |        |        |        |        |        |

|              |    |     |       |       |              |         |      |         |   |  |  |  |  |  |              |              |              |              |              |              |
|--------------|----|-----|-------|-------|--------------|---------|------|---------|---|--|--|--|--|--|--------------|--------------|--------------|--------------|--------------|--------------|
| 0            | T6 | C02 | 0     | 0     | kleiner LLOQ | #VALUE! | 1    | #VALUE! | F |  |  |  |  |  |              |              |              |              |              |              |
| 0            | T6 | C03 | 0     | 0     | kleiner LLOQ | #VALUE! | 1    | #VALUE! | G |  |  |  |  |  | Blank PEG    | Blank PEG    | Blank PEG    | Blank PEG    | Blank PEG    | Blank PEG    |
| 0            | T6 | C04 | 0     | 0     | kleiner LLOQ | #VALUE! | 1    | #VALUE! | H |  |  |  |  |  | Blank no PEG | Blank no PEG | Blank no PEG | Blank no PEG | Blank no PEG | Blank no PEG |
| T6HS21       | T6 | C05 | 1.181 | 1.130 | 1.130        | 0.076   | 2.75 | 0.208   |   |  |  |  |  |  |              |              |              |              |              |              |
| T6HS21       | T6 | C06 | 1.211 | 1.160 | 1.160        | 0.080   | 2.75 | 0.221   |   |  |  |  |  |  |              |              |              |              |              |              |
| T6HS22       | T6 | C07 | 1.314 | 1.263 | 1.263        | 0.098   | 2.75 | 0.268   |   |  |  |  |  |  |              |              |              |              |              |              |
| T6HS22       | T6 | C08 | 1.355 | 1.304 | 1.304        | 0.104   | 2.75 | 0.287   |   |  |  |  |  |  |              |              |              |              |              |              |
| T6HS23       | T6 | C09 | 1.060 | 1.009 | 1.009        | 0.055   | 2.75 | 0.153   |   |  |  |  |  |  |              |              |              |              |              |              |
| T6HS23       | T6 | C10 | 1.076 | 1.025 | 1.025        | 0.058   | 2.75 | 0.160   |   |  |  |  |  |  |              |              |              |              |              |              |
| T6HS24       | T6 | C11 | 0     | 0     | kleiner LLOQ | #VALUE! | 1    | #VALUE! |   |  |  |  |  |  |              |              |              |              |              |              |
| T6HS24       | T6 | C12 | 0     | 0     | kleiner LLOQ | #VALUE! | 1    | #VALUE! |   |  |  |  |  |  |              |              |              |              |              |              |
| 0            | T6 | D01 | 0     | 0     | kleiner LLOQ | #VALUE! | 1    | #VALUE! |   |  |  |  |  |  |              |              |              |              |              |              |
| 0            | T6 | D02 | 0     | 0     | kleiner LLOQ | #VALUE! | 1    | #VALUE! |   |  |  |  |  |  |              |              |              |              |              |              |
| 0            | T6 | D03 | 0     | 0     | kleiner LLOQ | #VALUE! | 1    | #VALUE! |   |  |  |  |  |  |              |              |              |              |              |              |
| 0            | T6 | D04 | 0     | 0     | kleiner LLOQ | #VALUE! | 1    | #VALUE! |   |  |  |  |  |  |              |              |              |              |              |              |
| 0            | T6 | D05 | 0     | 0     | kleiner LLOQ | #VALUE! | 1    | #VALUE! |   |  |  |  |  |  |              |              |              |              |              |              |
| 0            | T6 | D06 | 0     | 0     | kleiner LLOQ | #VALUE! | 1    | #VALUE! |   |  |  |  |  |  |              |              |              |              |              |              |
| 0            | T6 | D07 | 0     | 0     | kleiner LLOQ | #VALUE! | 1    | #VALUE! |   |  |  |  |  |  |              |              |              |              |              |              |
| 0            | T6 | D08 | 0     | 0     | kleiner LLOQ | #VALUE! | 1    | #VALUE! |   |  |  |  |  |  |              |              |              |              |              |              |
| 0            | T6 | D09 | 0     | 0     | kleiner LLOQ | #VALUE! | 1    | #VALUE! |   |  |  |  |  |  |              |              |              |              |              |              |
| 0            | T6 | D10 | 0     | 0     | kleiner LLOQ | #VALUE! | 1    | #VALUE! |   |  |  |  |  |  |              |              |              |              |              |              |
| 0            | T6 | D11 | 0     | 0     | kleiner LLOQ | #VALUE! | 1    | #VALUE! |   |  |  |  |  |  |              |              |              |              |              |              |
| 0            | T6 | D12 | 0     | 0     | kleiner LLOQ | #VALUE! | 1    | #VALUE! |   |  |  |  |  |  |              |              |              |              |              |              |
| 0            | T6 | E01 | 0     | 0     | kleiner LLOQ | #VALUE! | 1    | #VALUE! |   |  |  |  |  |  |              |              |              |              |              |              |
| 0            | T6 | E02 | 0     | 0     | kleiner LLOQ | #VALUE! | 1    | #VALUE! |   |  |  |  |  |  |              |              |              |              |              |              |
| 0            | T6 | E03 | 0     | 0     | kleiner LLOQ | #VALUE! | 1    | #VALUE! |   |  |  |  |  |  |              |              |              |              |              |              |
| 0            | T6 | E04 | 0     | 0     | kleiner LLOQ | #VALUE! | 1    | #VALUE! |   |  |  |  |  |  |              |              |              |              |              |              |
| 0            | T6 | E05 | 0     | 0     | kleiner LLOQ | #VALUE! | 1    | #VALUE! |   |  |  |  |  |  |              |              |              |              |              |              |
| 0            | T6 | E06 | 0     | 0     | kleiner LLOQ | #VALUE! | 1    | #VALUE! |   |  |  |  |  |  |              |              |              |              |              |              |
| 0            | T6 | E07 | 0     | 0     | kleiner LLOQ | #VALUE! | 1    | #VALUE! |   |  |  |  |  |  |              |              |              |              |              |              |
| 0            | T6 | E08 | 0     | 0     | kleiner LLOQ | #VALUE! | 1    | #VALUE! |   |  |  |  |  |  |              |              |              |              |              |              |
| 0            | T6 | E09 | 0     | 0     | kleiner LLOQ | #VALUE! | 1    | #VALUE! |   |  |  |  |  |  |              |              |              |              |              |              |
| 0            | T6 | E10 | 0     | 0     | kleiner LLOQ | #VALUE! | 1    | #VALUE! |   |  |  |  |  |  |              |              |              |              |              |              |
| 0            | T6 | E11 | 0     | 0     | kleiner LLOQ | #VALUE! | 1    | #VALUE! |   |  |  |  |  |  |              |              |              |              |              |              |
| 0            | T6 | E12 | 0     | 0     | kleiner LLOQ | #VALUE! | 1    | #VALUE! |   |  |  |  |  |  |              |              |              |              |              |              |
| 0            | T6 | F01 | 0     | 0     | kleiner LLOQ | #VALUE! | 1    | #VALUE! |   |  |  |  |  |  |              |              |              |              |              |              |
| 0            | T6 | F02 | 0     | 0     | kleiner LLOQ | #VALUE! | 1    | #VALUE! |   |  |  |  |  |  |              |              |              |              |              |              |
| 0            | T6 | F03 | 0     | 0     | kleiner LLOQ | #VALUE! | 1    | #VALUE! |   |  |  |  |  |  |              |              |              |              |              |              |
| 0            | T6 | F04 | 0     | 0     | kleiner LLOQ | #VALUE! | 1    | #VALUE! |   |  |  |  |  |  |              |              |              |              |              |              |
| 0            | T6 | F05 | 0     | 0     | kleiner LLOQ | #VALUE! | 1    | #VALUE! |   |  |  |  |  |  |              |              |              |              |              |              |
| 0            | T6 | F06 | 0     | 0     | kleiner LLOQ | #VALUE! | 1    | #VALUE! |   |  |  |  |  |  |              |              |              |              |              |              |
| 0            | T6 | F07 | 0     | 0     | kleiner LLOQ | #VALUE! | 1    | #VALUE! |   |  |  |  |  |  |              |              |              |              |              |              |
| 0            | T6 | F08 | 0     | 0     | kleiner LLOQ | #VALUE! | 1    | #VALUE! |   |  |  |  |  |  |              |              |              |              |              |              |
| 0            | T6 | F09 | 0     | 0     | kleiner LLOQ | #VALUE! | 1    | #VALUE! |   |  |  |  |  |  |              |              |              |              |              |              |
| 0            | T6 | F10 | 0     | 0     | kleiner LLOQ | #VALUE! | 1    | #VALUE! |   |  |  |  |  |  |              |              |              |              |              |              |
| 0            | T6 | F11 | 0     | 0     | kleiner LLOQ | #VALUE! | 1    | #VALUE! |   |  |  |  |  |  |              |              |              |              |              |              |
| 0            | T6 | F12 | 0     | 0     | kleiner LLOQ | #VALUE! | 1    | #VALUE! |   |  |  |  |  |  |              |              |              |              |              |              |
| 0            | T6 | G01 | 0     | 0     | kleiner LLOQ | #VALUE! | 1    | #VALUE! |   |  |  |  |  |  |              |              |              |              |              |              |
| 0            | T6 | G02 | 0     | 0     | kleiner LLOQ | #VALUE! | 1    | #VALUE! |   |  |  |  |  |  |              |              |              |              |              |              |
| 0            | T6 | G03 | 0     | 0     | kleiner LLOQ | #VALUE! | 1    | #VALUE! |   |  |  |  |  |  |              |              |              |              |              |              |
| 0            | T6 | G04 | 0     | 0     | kleiner LLOQ | #VALUE! | 1    | #VALUE! |   |  |  |  |  |  |              |              |              |              |              |              |
| 0            | T6 | G05 | 0     | 0     | kleiner LLOQ | #VALUE! | 1    | #VALUE! |   |  |  |  |  |  |              |              |              |              |              |              |
| 0            | T6 | G06 | 0     | 0     | kleiner LLOQ | #VALUE! | 1    | #VALUE! |   |  |  |  |  |  |              |              |              |              |              |              |
| Blank PEG    | T6 | G07 | 0     | 0     | kleiner LLOQ | #VALUE! | 2.75 | #VALUE! |   |  |  |  |  |  |              |              |              |              |              |              |
| Blank PEG    | T6 | G08 | 0     | 0     | kleiner LLOQ | #VALUE! | 2.75 | #VALUE! |   |  |  |  |  |  |              |              |              |              |              |              |
| Blank PEG    | T6 | G09 | 0     | 0     | kleiner LLOQ | #VALUE! | 2.75 | #VALUE! |   |  |  |  |  |  |              |              |              |              |              |              |
| Blank PEG    | T6 | G10 | 0     | 0     | kleiner LLOQ | #VALUE! | 2.75 | #VALUE! |   |  |  |  |  |  |              |              |              |              |              |              |
| Blank PEG    | T6 | G11 | 0     | 0     | kleiner LLOQ | #VALUE! | 2.75 | #VALUE! |   |  |  |  |  |  |              |              |              |              |              |              |
| Blank PEG    | T6 | G12 | 0     | 0     | kleiner LLOQ | #VALUE! | 2.75 | #VALUE! |   |  |  |  |  |  |              |              |              |              |              |              |
| 0            | T6 | H01 | 0     | 0     | kleiner LLOQ | #VALUE! | 1    | #VALUE! |   |  |  |  |  |  |              |              |              |              |              |              |
| 0            | T6 | H02 | 0     | 0     | kleiner LLOQ | #VALUE! | 1    | #VALUE! |   |  |  |  |  |  |              |              |              |              |              |              |
| 0            | T6 | H03 | 0     | 0     | kleiner LLOQ | #VALUE! | 1    | #VALUE! |   |  |  |  |  |  |              |              |              |              |              |              |
| 0            | T6 | H04 | 0     | 0     | kleiner LLOQ | #VALUE! | 1    | #VALUE! |   |  |  |  |  |  |              |              |              |              |              |              |
| 0            | T6 | H05 | 0     | 0     | kleiner LLOQ | #VALUE! | 1    | #VALUE! |   |  |  |  |  |  |              |              |              |              |              |              |
| 0            | T6 | H06 | 0     | 0     | kleiner LLOQ | #VALUE! | 1    | #VALUE! |   |  |  |  |  |  |              |              |              |              |              |              |
| Blank no PEG | T6 | H07 | 0     | 0     | kleiner LLOQ | #VALUE! | 2.75 | #VALUE! |   |  |  |  |  |  |              |              |              |              |              |              |
| Blank no PEG | T6 | H08 | 0     | 0     | kleiner LLOQ | #VALUE! | 2.75 | #VALUE! |   |  |  |  |  |  |              |              |              |              |              |              |
| Blank no PEG | T6 | H09 | 0     | 0     | kleiner LLOQ | #VALUE! | 2.75 | #VALUE! |   |  |  |  |  |  |              |              |              |              |              |              |
| Blank no PEG | T6 | H10 | 0     | 0     | kleiner LLOQ | #VALUE! | 2.75 | #VALUE! |   |  |  |  |  |  |              |              |              |              |              |              |
| Blank no PEG | T6 | H11 | 0     | 0     | kleiner LLOQ | #VALUE! | 2.75 | #VALUE! |   |  |  |  |  |  |              |              |              |              |              |              |
| Blank no PEG | T6 | H12 | 0     | 0     | kleiner LLOQ | #VALUE! | 2.75 | #VALUE! |   |  |  |  |  |  |              |              |              |              |              |              |

Comment:

Date Operator

Date Control

|        |    |     |       |       |              |         |      |         |
|--------|----|-----|-------|-------|--------------|---------|------|---------|
| 0      | T7 | A01 | 0     | 0     | kleiner LLOQ | #VALUE! | 1    | #VALUE! |
| 0      | T7 | A02 | 0     | 0     | kleiner LLOQ | #VALUE! | 1    | #VALUE! |
| 0      | T7 | A03 | 0     | 0     | kleiner LLOQ | #VALUE! | 1    | #VALUE! |
| 0      | T7 | A04 | 0     | 0     | kleiner LLOQ | #VALUE! | 1    | #VALUE! |
| T7HN1  | T7 | A05 | 0     | 0     | kleiner LLOQ | #VALUE! | 1    | #VALUE! |
| T7HN1  | T7 | A06 | 0     | 0     | kleiner LLOQ | #VALUE! | 1    | #VALUE! |
| T7HN2  | T7 | A07 | 0     | 0     | kleiner LLOQ | #VALUE! | 1    | #VALUE! |
| T7HN2  | T7 | A08 | 0     | 0     | kleiner LLOQ | #VALUE! | 1    | #VALUE! |
| T7HN3  | T7 | A09 | 0     | 0     | kleiner LLOQ | #VALUE! | 1    | #VALUE! |
| T7HN3  | T7 | A10 | 0     | 0     | kleiner LLOQ | #VALUE! | 1    | #VALUE! |
| T7HN4  | T7 | A11 | 0     | 0     | kleiner LLOQ | #VALUE! | 1    | #VALUE! |
| T7HN4  | T7 | A12 | 0     | 0     | kleiner LLOQ | #VALUE! | 1    | #VALUE! |
| 0      | T7 | B01 | 0     | 0     | kleiner LLOQ | #VALUE! | 1    | #VALUE! |
| 0      | T7 | B02 | 0     | 0     | kleiner LLOQ | #VALUE! | 1    | #VALUE! |
| 0      | T7 | B03 | 0     | 0     | kleiner LLOQ | #VALUE! | 1    | #VALUE! |
| 0      | T7 | B04 | 0     | 0     | kleiner LLOQ | #VALUE! | 1    | #VALUE! |
| T7HS11 | T7 | B05 | 0     | 0     | kleiner LLOQ | #VALUE! | 1    | #VALUE! |
| T7HS11 | T7 | B06 | 0     | 0     | kleiner LLOQ | #VALUE! | 1    | #VALUE! |
| T7HS12 | T7 | B07 | 0     | 0     | kleiner LLOQ | #VALUE! | 1    | #VALUE! |
| T7HS12 | T7 | B08 | 0     | 0     | kleiner LLOQ | #VALUE! | 1    | #VALUE! |
| T7HS13 | T7 | B09 | 0     | 0     | kleiner LLOQ | #VALUE! | 1    | #VALUE! |
| T7HS13 | T7 | B10 | 0     | 0     | kleiner LLOQ | #VALUE! | 1    | #VALUE! |
| T7HS14 | T7 | B11 | 0     | 0     | kleiner LLOQ | #VALUE! | 1    | #VALUE! |
| T7HS14 | T7 | B12 | 0     | 0     | kleiner LLOQ | #VALUE! | 1    | #VALUE! |
| 0      | T7 | C01 | 0     | 0     | kleiner LLOQ | #VALUE! | 1    | #VALUE! |
| 0      | T7 | C02 | 0     | 0     | kleiner LLOQ | #VALUE! | 1    | #VALUE! |
| 0      | T7 | C03 | 0     | 0     | kleiner LLOQ | #VALUE! | 1    | #VALUE! |
| 0      | T7 | C04 | 0     | 0     | kleiner LLOQ | #VALUE! | 1    | #VALUE! |
| T7HS21 | T7 | C05 | 0     | 0     | kleiner LLOQ | #VALUE! | 1    | #VALUE! |
| T7HS21 | T7 | C06 | 0     | 0     | kleiner LLOQ | #VALUE! | 1    | #VALUE! |
| T7HS22 | T7 | C07 | 0     | 0     | kleiner LLOQ | #VALUE! | 1    | #VALUE! |
| T7HS22 | T7 | C08 | 0     | 0     | kleiner LLOQ | #VALUE! | 1    | #VALUE! |
| T7HS23 | T7 | C09 | 1.123 | 1.072 | 1.072        | 0.086   | 2.75 | 0.182   |
| T7HS23 | T7 | C10 | 1.101 | 1.050 | 1.050        | 0.062   | 2.75 | 0.171   |
| T7HS24 | T7 | C11 | 0     | 0     | kleiner LLOQ | #VALUE! | 1    | #VALUE! |
| T7HS24 | T7 | C12 | 0     | 0     | kleiner LLOQ | #VALUE! | 1    | #VALUE! |
| 0      | T7 | D01 | 0     | 0     | kleiner LLOQ | #VALUE! | 1    | #VALUE! |
| 0      | T7 | D02 | 0     | 0     | kleiner LLOQ | #VALUE! | 1    | #VALUE! |
| 0      | T7 | D03 | 0     | 0     | kleiner LLOQ | #VALUE! | 1    | #VALUE! |
| 0      | T7 | D04 | 0     | 0     | kleiner LLOQ | #VALUE! | 1    | #VALUE! |
| 0      | T7 | D05 | 0     | 0     | kleiner LLOQ | #VALUE! | 1    | #VALUE! |
| 0      | T7 | D06 | 0     | 0     | kleiner LLOQ | #VALUE! | 1    | #VALUE! |
| 0      | T7 | D07 | 0     | 0     | kleiner LLOQ | #VALUE! | 1    | #VALUE! |
| 0      | T7 | D08 | 0     | 0     | kleiner LLOQ | #VALUE! | 1    | #VALUE! |
| 0      | T7 | D09 | 0     | 0     | kleiner LLOQ | #VALUE! | 1    | #VALUE! |
| 0      | T7 | D10 | 0     | 0     | kleiner LLOQ | #VALUE! | 1    | #VALUE! |
| 0      | T7 | D11 | 0     | 0     | kleiner LLOQ | #VALUE! | 1    | #VALUE! |
| 0      | T7 | D12 | 0     | 0     | kleiner LLOQ | #VALUE! | 1    | #VALUE! |
| 0      | T7 | E01 | 0     | 0     | kleiner LLOQ | #VALUE! | 1    | #VALUE! |
| 0      | T7 | E02 | 0     | 0     | kleiner LLOQ | #VALUE! | 1    | #VALUE! |
| 0      | T7 | E03 | 0     | 0     | kleiner LLOQ | #VALUE! | 1    | #VALUE! |
| 0      | T7 | E04 | 0     | 0     | kleiner LLOQ | #VALUE! | 1    | #VALUE! |
| 0      | T7 | E05 | 0     | 0     | kleiner LLOQ | #VALUE! | 1    | #VALUE! |
| 0      | T7 | E06 | 0     | 0     | kleiner LLOQ | #VALUE! | 1    | #VALUE! |
| 0      | T7 | E07 | 0     | 0     | kleiner LLOQ | #VALUE! | 1    | #VALUE! |
| 0      | T7 | E08 | 0     | 0     | kleiner LLOQ | #VALUE! | 1    | #VALUE! |
| 0      | T7 | E09 | 0     | 0     | kleiner LLOQ | #VALUE! | 1    | #VALUE! |

Plate: T7

|   | 1 | 2 | 3 | 4 | 5 | 6 | 7 | 8     | 9     | 10    | 11    | 12    |       |
|---|---|---|---|---|---|---|---|-------|-------|-------|-------|-------|-------|
| A |   |   |   |   |   |   |   |       |       |       |       |       |       |
| B |   |   |   |   |   |   |   |       |       |       |       |       |       |
| C |   |   |   |   |   |   |   |       | 1.123 | 1.101 |       |       |       |
| D |   |   |   |   |   |   |   |       |       |       |       |       |       |
| E |   |   |   |   |   |   |   |       |       |       |       |       |       |
| F |   |   |   |   |   |   |   |       |       |       |       |       |       |
| G |   |   |   |   |   |   |   | 0.051 | 0.051 | 0.051 | 0.053 | 0.052 | 0.051 |
| H |   |   |   |   |   |   |   | 0.050 | 0.050 | 0.050 | 0.050 | 0.050 | 0.050 |

Plattenbelegung

|   | 1 | 2 | 3 | 4 | 5      | 6      | 7      | 8            | 9            | 10           | 11           | 12           |
|---|---|---|---|---|--------|--------|--------|--------------|--------------|--------------|--------------|--------------|
| A |   |   |   |   | T7HN1  | T7HN1  | T7HN2  | T7HN2        | T7HN3        | T7HN3        | T7HN4        | T7HN4        |
| B |   |   |   |   | T7HS11 | T7HS11 | T7HS12 | T7HS12       | T7HS13       | T7HS13       | T7HS14       | T7HS14       |
| C |   |   |   |   | T7HS21 | T7HS21 | T7HS22 | T7HS22       | T7HS23       | T7HS23       | T7HS24       | T7HS24       |
| D |   |   |   |   |        |        |        |              |              |              |              |              |
| E |   |   |   |   |        |        |        |              |              |              |              |              |
| F |   |   |   |   |        |        |        |              |              |              |              |              |
| G |   |   |   |   |        |        |        | Blank PEG    | Blank PEG    | Blank PEG    | Blank PEG    | Blank PEG    |
| H |   |   |   |   |        |        |        | Blank no PEG | Blank no PEG | Blank no PEG | Blank no PEG | Blank no PEG |

Comment:

Date Operator

Date Control

|              |    |     |   |   |              |         |      |         |
|--------------|----|-----|---|---|--------------|---------|------|---------|
| 0            | T7 | E10 | 0 | 0 | kleiner LLOQ | #VALUE! | 1    | #VALUE! |
| 0            | T7 | E11 | 0 | 0 | kleiner LLOQ | #VALUE! | 1    | #VALUE! |
| 0            | T7 | E12 | 0 | 0 | kleiner LLOQ | #VALUE! | 1    | #VALUE! |
| 0            | T7 | F01 | 0 | 0 | kleiner LLOQ | #VALUE! | 1    | #VALUE! |
| 0            | T7 | F02 | 0 | 0 | kleiner LLOQ | #VALUE! | 1    | #VALUE! |
| 0            | T7 | F03 | 0 | 0 | kleiner LLOQ | #VALUE! | 1    | #VALUE! |
| 0            | T7 | F04 | 0 | 0 | kleiner LLOQ | #VALUE! | 1    | #VALUE! |
| 0            | T7 | F05 | 0 | 0 | kleiner LLOQ | #VALUE! | 1    | #VALUE! |
| 0            | T7 | F06 | 0 | 0 | kleiner LLOQ | #VALUE! | 1    | #VALUE! |
| 0            | T7 | F07 | 0 | 0 | kleiner LLOQ | #VALUE! | 1    | #VALUE! |
| 0            | T7 | F08 | 0 | 0 | kleiner LLOQ | #VALUE! | 1    | #VALUE! |
| 0            | T7 | F09 | 0 | 0 | kleiner LLOQ | #VALUE! | 1    | #VALUE! |
| 0            | T7 | F10 | 0 | 0 | kleiner LLOQ | #VALUE! | 1    | #VALUE! |
| 0            | T7 | F11 | 0 | 0 | kleiner LLOQ | #VALUE! | 1    | #VALUE! |
| 0            | T7 | F12 | 0 | 0 | kleiner LLOQ | #VALUE! | 1    | #VALUE! |
| 0            | T7 | G01 | 0 | 0 | kleiner LLOQ | #VALUE! | 1    | #VALUE! |
| 0            | T7 | G02 | 0 | 0 | kleiner LLOQ | #VALUE! | 1    | #VALUE! |
| 0            | T7 | G03 | 0 | 0 | kleiner LLOQ | #VALUE! | 1    | #VALUE! |
| 0            | T7 | G04 | 0 | 0 | kleiner LLOQ | #VALUE! | 1    | #VALUE! |
| 0            | T7 | G05 | 0 | 0 | kleiner LLOQ | #VALUE! | 1    | #VALUE! |
| 0            | T7 | G06 | 0 | 0 | kleiner LLOQ | #VALUE! | 1    | #VALUE! |
| Blank PEG    | T7 | G07 | 0 | 0 | kleiner LLOQ | #VALUE! | 2.75 | #VALUE! |
| Blank PEG    | T7 | G08 | 0 | 0 | kleiner LLOQ | #VALUE! | 2.75 | #VALUE! |
| Blank PEG    | T7 | G09 | 0 | 0 | kleiner LLOQ | #VALUE! | 2.75 | #VALUE! |
| Blank PEG    | T7 | G10 | 0 | 0 | kleiner LLOQ | #VALUE! | 2.75 | #VALUE! |
| Blank PEG    | T7 | G11 | 0 | 0 | kleiner LLOQ | #VALUE! | 2.75 | #VALUE! |
| Blank PEG    | T7 | G12 | 0 | 0 | kleiner LLOQ | #VALUE! | 2.75 | #VALUE! |
| 0            | T7 | H01 | 0 | 0 | kleiner LLOQ | #VALUE! | 1    | #VALUE! |
| 0            | T7 | H02 | 0 | 0 | kleiner LLOQ | #VALUE! | 1    | #VALUE! |
| 0            | T7 | H03 | 0 | 0 | kleiner LLOQ | #VALUE! | 1    | #VALUE! |
| 0            | T7 | H04 | 0 | 0 | kleiner LLOQ | #VALUE! | 1    | #VALUE! |
| 0            | T7 | H05 | 0 | 0 | kleiner LLOQ | #VALUE! | 1    | #VALUE! |
| 0            | T7 | H06 | 0 | 0 | kleiner LLOQ | #VALUE! | 1    | #VALUE! |
| Blank no PEG | T7 | H07 | 0 | 0 | kleiner LLOQ | #VALUE! | 2.75 | #VALUE! |
| Blank no PEG | T7 | H08 | 0 | 0 | kleiner LLOQ | #VALUE! | 2.75 | #VALUE! |
| Blank no PEG | T7 | H09 | 0 | 0 | kleiner LLOQ | #VALUE! | 2.75 | #VALUE! |
| Blank no PEG | T7 | H10 | 0 | 0 | kleiner LLOQ | #VALUE! | 2.75 | #VALUE! |
| Blank no PEG | T7 | H11 | 0 | 0 | kleiner LLOQ | #VALUE! | 2.75 | #VALUE! |
| Blank no PEG | T7 | H12 | 0 | 0 | kleiner LLOQ | #VALUE! | 2.75 | #VALUE! |



|       |       |       |       |       |       |       |       |       |       |       |       |
|-------|-------|-------|-------|-------|-------|-------|-------|-------|-------|-------|-------|
| 1.447 | 1.739 |       | 1.170 |       |       |       |       |       | 0.667 | 0.440 | 0.043 |
| 1.447 | 1.332 |       | 1.392 | 0.137 | 0.146 | 0.130 | 0.138 | 0.109 | 0.729 | 0.478 | 0.042 |
| 1.391 | 1.281 |       | 1.311 | 0.204 | 0.184 | 0.184 | 0.198 | 0.201 | 0.743 | 0.474 | 0.043 |
| 0.961 | 0.835 |       | 1.405 | 0.336 | 0.347 | 0.375 | 0.387 | 0.300 | 0.824 | 0.483 | 0.044 |
| 0.445 | 0.441 |       | 1.280 | 1.085 | 1.086 | 1.218 | 1.004 | 0.873 | 0.704 | 0.457 | 0.041 |
| 0.355 | 0.315 |       | 1.332 | 1.768 | 1.925 | 1.753 | 1.739 | 1.606 |       |       | 0.036 |
| 0.223 | 0.188 | 1.666 | 1.499 | 1.632 |       | 0.048 | 0.046 | 0.047 | 0.048 | 0.048 | 0.048 |
| 0.118 | 0.106 | 1.556 | 1.622 | 1.573 |       | 0.047 | 0.054 | 0.051 | 0.051 | 0.052 | 0.051 |

1

|       |       |       |       |       |       |       |       |       |       |       |       |
|-------|-------|-------|-------|-------|-------|-------|-------|-------|-------|-------|-------|
| 1.652 | 1.627 |       | 1.188 | 0.748 | 0.811 | 0.764 | 0.753 | 0.674 | 0.751 | 0.529 | 0.044 |
| 1.443 | 1.372 |       | 1.364 | 0.139 | 0.147 | 0.131 | 0.139 | 0.110 | 0.811 | 0.561 | 0.043 |
| 1.377 | 1.281 |       | 1.284 | 0.206 | 0.189 | 0.184 | 0.200 | 0.202 | 0.821 | 0.560 | 0.044 |
| 0.972 | 0.883 |       | 1.387 | 0.339 | 0.349 | 0.386 | 0.406 | 0.312 | 0.903 | 0.565 | 0.044 |
| 0.484 | 0.474 |       | 1.298 | 1.087 | 1.113 | 1.203 | 1.022 | 0.903 | 0.790 | 0.544 | 0.042 |
| 0.359 | 0.326 |       | 1.308 | 1.622 | 1.622 | 1.630 | 1.625 | 1.550 |       |       | 0.037 |
| 0.228 | 0.199 | 1.527 | 1.373 | 1.462 |       | 0.048 | 0.046 | 0.048 | 0.049 | 0.049 | 0.049 |
| 0.125 | 0.109 | 1.473 | 1.410 | 1.371 |       | 0.048 | 0.054 | 0.052 | 0.052 | 0.052 | 0.051 |

2

|       |       |       |       |       |       |       |       |       |       |       |       |
|-------|-------|-------|-------|-------|-------|-------|-------|-------|-------|-------|-------|
| 1.579 | 1.475 |       | 1.150 | 1.210 | 1.303 | 1.202 | 1.219 | 1.125 | 0.759 | 0.549 | 0.043 |
| 1.357 | 1.303 |       | 1.283 | 0.140 | 0.148 | 0.131 | 0.139 | 0.111 | 0.820 | 0.575 | 0.043 |
| 1.323 | 1.228 |       | 1.227 | 0.206 | 0.188 | 0.184 | 0.198 | 0.201 | 0.824 | 0.579 | 0.043 |
| 0.959 | 0.872 |       | 1.321 | 0.339 | 0.348 | 0.387 | 0.406 | 0.314 | 0.909 | 0.580 | 0.044 |
| 0.483 | 0.473 |       | 1.270 | 1.069 | 1.103 | 1.181 | 1.017 | 0.903 | 0.798 | 0.560 | 0.042 |
| 0.360 | 0.326 |       | 1.270 | 1.497 | 1.448 | 1.496 | 1.494 | 1.449 |       |       | 0.037 |
| 0.228 | 0.199 | 1.374 | 1.262 | 1.314 |       | 0.048 | 0.046 | 0.048 | 0.049 | 0.049 | 0.049 |
| 0.125 | 0.110 | 1.346 | 1.262 | 1.253 |       | 0.048 | 0.054 | 0.052 | 0.052 | 0.052 | 0.051 |

3

|       |       |  |  |       |       |       |       |       |       |       |       |
|-------|-------|--|--|-------|-------|-------|-------|-------|-------|-------|-------|
| 1.511 | 1.369 |  |  | 1.538 | 1.712 | 1.528 | 1.502 | 1.425 |       |       | 0.043 |
| 1.296 | 1.261 |  |  |       |       |       |       |       |       |       | 0.043 |
| 1.272 | 1.193 |  |  |       |       |       |       |       |       |       | 0.043 |
| 0.947 | 0.859 |  |  |       |       |       |       |       |       |       | 0.044 |
| 0.481 | 0.471 |  |  |       |       |       |       |       |       |       | 0.042 |
| 0.361 | 0.325 |  |  |       |       |       |       |       |       |       | 0.037 |
| 0.229 | 0.199 |  |  |       |       | 0.048 | 0.046 | 0.048 | 0.049 | 0.049 | 0.049 |
| 0.125 | 0.110 |  |  |       |       | 0.047 | 0.054 | 0.052 | 0.052 | 0.052 | 0.051 |

4

|       |       |       |       |       |       |       |       |       |       |       |       |
|-------|-------|-------|-------|-------|-------|-------|-------|-------|-------|-------|-------|
| 1.493 | 1.317 | 1.678 | 1.110 | 1.621 | 1.807 | 1.618 | 1.584 | 1.508 | 0.765 | 0.597 | 0.043 |
| 1.259 | 1.238 | 1.850 | 1.197 | 0.139 | 0.150 | 0.132 | 0.139 | 0.111 | 0.821 | 0.588 | 0.043 |
| 1.248 | 1.175 | 1.816 | 1.153 | 0.204 | 0.188 | 0.184 | 0.197 | 0.199 | 0.831 | 0.599 | 0.044 |
| 0.943 | 0.859 | 1.970 | 1.231 | 0.338 | 0.357 | 0.386 | 0.406 | 0.316 | 0.916 | 0.595 | 0.044 |
| 0.480 | 0.470 | 2.220 | 1.220 | 1.054 | 1.088 | 1.154 | 1.006 | 0.902 | 0.805 | 0.579 | 0.042 |
| 0.359 | 0.325 | 2.149 | 1.211 | 1.395 | 1.324 | 1.348 | 1.345 | 1.317 | 0.037 | 0.037 | 0.037 |
| 0.228 | 0.199 | 1.240 | 1.151 | 1.183 | 0.034 | 0.049 | 0.046 | 0.048 | 0.049 | 0.049 | 0.049 |
| 0.125 | 0.110 | 1.223 | 1.132 | 1.146 | 0.038 | 0.048 | 0.054 | 0.052 | 0.052 | 0.052 | 0.051 |

5

|       |       |  |       |       |       |       |       |       |       |       |       |
|-------|-------|--|-------|-------|-------|-------|-------|-------|-------|-------|-------|
| 1.434 | 1.258 |  | 1.090 | 1.648 | 1.876 | 1.649 | 1.627 | 1.535 |       |       |       |
| 1.217 | 1.201 |  | 1.149 |       |       |       |       |       |       |       |       |
| 1.205 | 1.143 |  | 1.109 |       |       |       |       |       |       |       |       |
| 0.935 | 0.845 |  | 1.182 |       |       |       |       |       |       |       |       |
| 0.477 | 0.469 |  | 1.181 |       |       |       |       |       |       |       |       |
| 0.360 | 0.323 |  | 1.167 |       |       |       |       |       |       |       |       |
| 0.229 | 0.200 |  |       |       |       | 0.049 | 0.047 | 0.048 | 0.049 | 0.049 | 0.049 |
| 0.125 | 0.110 |  |       |       |       | 0.048 | 0.054 | 0.052 | 0.052 | 0.052 | 0.051 |

6

|       |       |       |       |       |       |       |       |       |       |       |       |
|-------|-------|-------|-------|-------|-------|-------|-------|-------|-------|-------|-------|
| 1.013 | 0.810 |       | 0.668 | 0.808 | 0.940 | 0.720 | 0.798 | 0.687 | 0.904 | 0.845 | 0.043 |
| 0.709 | 0.827 |       | 0.703 | 0.142 | 0.156 | 0.136 | 0.137 | 0.116 | 0.990 | 0.846 | 0.042 |
| 0.682 | 0.692 |       | 0.680 | 0.197 | 0.188 | 0.190 | 0.191 | 0.184 | 1.023 | 0.861 | 0.043 |
| 0.507 | 0.519 |       | 0.740 | 0.316 | 0.264 | 0.364 | 0.377 | 0.312 | 1.111 | 0.870 | 0.043 |
| 0.394 | 0.406 |       | 0.682 | 0.580 | 0.561 | 0.600 | 0.529 | 0.563 | 0.962 | 0.834 | 0.042 |
| 0.333 | 0.322 |       | 0.661 | 0.995 | 0.930 | 0.848 | 0.832 | 0.797 | 0.037 | 0.037 | 0.037 |
| 0.229 | 0.201 | 0.843 | 0.679 | 0.732 |       | 0.048 | 0.046 | 0.047 |       |       | 0.047 |
| 0.124 | 0.111 | 0.773 | 0.682 | 0.701 |       | 0.047 | 0.053 | 0.051 | 0.051 | 0.052 | 0.051 |

7

skin cultivation





|                    |              |                              |                            |                              |                              |
|--------------------|--------------|------------------------------|----------------------------|------------------------------|------------------------------|
| Project number     | F-120        | Apparatus                    | Wallac Victor              | Operator                     | IsBa                         |
| GLP Study (Number) | n.a.         | Protocol (instrument method) | LDH test 2016              | Date of preparation          | 19-04-18                     |
| hot substance      | isotope      | File name (results)          | IsBa_180419/20_LDH_full_v2 | Date of measurement          | 19-04-18                     |
|                    | name         | Kind of well plate           | 96 well                    | shaking time [min]           | 30                           |
| cold substance     | ACB-ID       | sample volume [µL]           | 100                        | stirring rate (Target) [rpm] | 150                          |
|                    | Batch number | Cocktail volume [µL]         | 175                        | Kind of measurement          | UV-vis                       |
|                    | name         | ACB-ID of cocktail           | LDH                        | Wave length [nm]             | 450                          |
| n.a.               | ACB-ID       | Matrix                       | DMEM (from powder)+PEG     | Remarks                      | Cocktail 100µl RM, 75µl STOP |
|                    | Batch number | Blank description            | DMEM/PEG, H2O              | Remarks                      | 7 standards split low/high   |
| n.a.               | n.a.         | Pipettes (No. / volume)      | 50-200µl                   | Remarks                      | KLP4 common for both         |
| n.a.               | n.a.         | Pipettes (No. / volume)      | n.a.                       | Remarks                      | n.a.                         |

Messdaten (diese Tabelle in Bericht übernehmen)

| Sample name * | concentration (theor.) * | measured data | measured data | mean measured | SD    | RSD   | Blank * | measured data after * Blank subtraction | concentration (calc.) * | Deviation * | Residuen |
|---------------|--------------------------|---------------|---------------|---------------|-------|-------|---------|-----------------------------------------|-------------------------|-------------|----------|
|               | [µg/mL]                  | [AU]          | [AU]          | [AU]          | [AU]  | [%]   | [AU]    |                                         | [µg/mL]                 | [%]         |          |
| KLP1          |                          |               |               |               |       |       | 0.047   |                                         |                         |             |          |
| KLP2          |                          |               |               |               |       |       | 0.054   |                                         |                         |             |          |
| KLP3          |                          |               |               |               |       |       | 0.051   |                                         |                         |             |          |
| KLP4          | 0.041                    | 0.959         | 0.972         | 0.883         | 0.938 | 0.04  | 4.19    | 0.051                                   | 0.887                   | 0.041       | -0.57    |
| KLP5          | 0.018                    | 0.483         | 0.484         | 0.474         | 0.480 | 0.00  | 0.98    | 0.052                                   | 0.429                   | 0.019       | 2.42     |
| KLP6          | 0.012                    | 0.360         | 0.359         | 0.326         | 0.348 | 0.02  | 4.54    | 0.051                                   | 0.297                   | 0.013       | 5.00     |
| KLP7          | 0.007                    | 0.228         | 0.228         | 0.199         | 0.218 | 0.014 | 6.35    |                                         | 0.168                   | 0.006       | -11.29   |
| KLP8          |                          |               |               |               |       |       |         |                                         |                         |             |          |

Statistical data

|                                              |                                          |                     |              |
|----------------------------------------------|------------------------------------------|---------------------|--------------|
| Geradensteigung                              | Slope                                    | m                   | 21.03        |
| Y-Achsenabschnitt                            | Y-Intercept                              | b                   | 0.03         |
| Standardabw. Geradensteigung                 | SD-Slope                                 | S <sub>m</sub>      | 0.648055501  |
| Standardabw. Achsenabschnittes               | SD-Y-Intercept                           | S <sub>b</sub>      | 0.015177452  |
| Anzahl Messpunkte                            | number of measuring points               | n                   | 4            |
| Quadratsumme                                 | sum of squares                           | Q <sub>xx</sub>     | 0.000664046  |
| Bereichsmittle                               |                                          |                     | 0.019557193  |
| Freiheitsgrade                               | degree of freedom                        | f                   | 2            |
| Student-t-Faktor für (P = 95 %; f = n-2)     | Student-t-factor for (P = 95 %; f = n-2) | t                   | 4.303        |
| Vertrauensbereich Steig. (95 %) Obergrenze   |                                          | m + VB <sub>m</sub> | 23.81763508  |
| Vertrauensbereich Steig. (95 %) Untergrenze  |                                          | m - VB <sub>m</sub> | 18.24046944  |
| Vertrauensbereich Achsenabschnitt (95 %) Og. |                                          | b + VB <sub>b</sub> | 0.099335829  |
| Vertrauensbereich Achsenabschnitt (95 %) Ug. |                                          | b - VB <sub>b</sub> | -0.031281327 |
| Korrelationskoeffizient                      | correlation coefficient                  | r                   | 0.9991       |
| Bestimmtheitsmaß                             | determination coefficient                | r <sup>2</sup>      | 0.9981       |
| Reststandardabweichung                       |                                          | S <sub>0</sub>      | 0.01669983   |
| Summe Restquadrate                           |                                          | sd                  | 0.657385838  |
| Verfahrensstandardabw.                       |                                          | S <sub>00</sub>     | 0.000794131  |
| Rel. Verfahrensstandardabw. %                |                                          | V <sub>00</sub>     | 4.060559029  |

Berichten

|                          |       |
|--------------------------|-------|
| mean Blank               | 0     |
| SD Blank                 | 0.00  |
| RSD Blank                | 3.79  |
| x <sup>2</sup> SD (LLOQ) | 0.01  |
| x <sup>2</sup> SD (LOD)  | 0.01  |
| LLOQ (AU)                | 0.061 |
| LOD (AU)                 | 0.067 |
| ULOQ                     | 0.887 |
| LLOQ (Lin)               | 0.168 |

Evaluation / Comment

LDH linearity valid with 7 standards, split in lin high and lin low, each with 4 standards and KLP4 common standard for both. R<sup>2</sup> 0,9981, deviations for both between -13.34% and +13.04%

Date Operator Date Operator Control

Figure 1 Linearity



Figure 2 Method validation Residuen Plot



Evaluation / Comment

lin passed

Date

Operator

Date

Control

| Sample name | Plate | Position | [AU]  | [AU]-Blank | Rating       | [µg/mL] | Dilution factor | [µg/mL] |
|-------------|-------|----------|-------|------------|--------------|---------|-----------------|---------|
| 0           | T8    | A01      | 0     | 0          | kleiner LLOQ | #VALUE! | 1               | #VALUE! |
| 0           | T8    | A02      | 0     | 0          | kleiner LLOQ | #VALUE! | 1               | #VALUE! |
| 0           | T8    | A03      | 0     | 0          | kleiner LLOQ | #VALUE! | 1               | #VALUE! |
| 0           | T8    | A04      | 0     | 0          | kleiner LLOQ | #VALUE! | 1               | #VALUE! |
| T8HN1       | T8    | A05      | 0.635 | 0.585      | 0.585        | 0.026   | 2.75            | 0.072   |
| T8HN1       | T8    | A06      | 0.607 | 0.556      | 0.556        | 0.025   | 2.75            | 0.068   |
| T8HN2       | T8    | A07      | 0.628 | 0.577      | 0.577        | 0.026   | 2.75            | 0.071   |
| T8HN2       | T8    | A08      | 0.661 | 0.610      | 0.610        | 0.027   | 2.75            | 0.075   |
| T8HN3       | T8    | A09      | 0.404 | 0.353      | 0.353        | 0.015   | 2.75            | 0.042   |
| T8HN3       | T8    | A10      | 0.309 | 0.258      | 0.258        | 0.011   | 2.75            | 0.029   |
| T8HN4       | T8    | A11      | 0.229 | 0.178      | 0.178        | 0.007   | 2.75            | 0.019   |
| T8HN4       | T8    | A12      | 0.222 | 0.171      | 0.171        | 0.007   | 2.75            | 0.018   |
| 0           | T8    | B01      | 0     | 0          | kleiner LLOQ | #VALUE! | 1               | #VALUE! |
| 0           | T8    | B02      | 0     | 0          | kleiner LLOQ | #VALUE! | 1               | #VALUE! |
| 0           | T8    | B03      | 0     | 0          | kleiner LLOQ | #VALUE! | 1               | #VALUE! |
| 0           | T8    | B04      | 0     | 0          | kleiner LLOQ | #VALUE! | 1               | #VALUE! |
| T8HS11      | T8    | B05      | 0.460 | 0.409      | 0.409        | 0.018   | 2.75            | 0.0491  |
| T8HS11      | T8    | B06      | 0     | 0          | kleiner LLOQ | #VALUE! | 2.75            | #VALUE! |
| T8HS12      | T8    | B07      | 0     | 0          | kleiner LLOQ | #VALUE! | 2.75            | #VALUE! |
| T8HS12      | T8    | B08      | 0     | 0          | kleiner LLOQ | #VALUE! | 2.75            | #VALUE! |
| T8HS13      | T8    | B09      | 0.129 | 0.078      | kleiner LLOQ | #VALUE! | 2.75            | #VALUE! |
| T8HS13      | T8    | B10      | 0.136 | 0.085      | kleiner LLOQ | #VALUE! | 2.75            | #VALUE! |
| T8HS14      | T8    | B11      | 0.081 | 0.030      | kleiner LLOQ | #VALUE! | 2.75            | #VALUE! |
| T8HS14      | T8    | B12      | 0.084 | 0.033      | kleiner LLOQ | #VALUE! | 2.75            | #VALUE! |
| 0           | T8    | C01      | 0     | 0          | kleiner LLOQ | #VALUE! | 1               | #VALUE! |
| 0           | T8    | C02      | 0     | 0          | kleiner LLOQ | #VALUE! | 1               | #VALUE! |
| 0           | T8    | C03      | 0     | 0          | kleiner LLOQ | #VALUE! | 1               | #VALUE! |
| 0           | T8    | C04      | 0     | 0          | kleiner LLOQ | #VALUE! | 1               | #VALUE! |
| T8HS21      | T8    | C05      | 0.458 | 0.407      | 0.407        | 0.018   | 2.75            | 0.049   |
| T8HS21      | T8    | C06      | 0.708 | 0.657      | 0.657        | 0.030   | 2.75            | 0.081   |
| T8HS22      | T8    | C07      | 0.553 | 0.502      | 0.502        | 0.022   | 2.75            | 0.061   |
| T8HS22      | T8    | C08      | 0.584 | 0.533      | 0.533        | 0.024   | 2.75            | 0.065   |
| T8HS23      | T8    | C09      | 0.670 | 0.619      | 0.619        | 0.028   | 2.75            | 0.076   |
| T8HS23      | T8    | C10      | 0.659 | 0.608      | 0.608        | 0.027   | 2.75            | 0.075   |
| T8HS24      | T8    | C11      | 0.222 | 0.171      | 0.171        | 0.007   | 2.75            | 0.018   |
| T8HS24      | T8    | C12      | 0.224 | 0.173      | 0.173        | 0.007   | 2.75            | 0.018   |
| 0           | T8    | D01      | 0     | 0          | kleiner LLOQ | #VALUE! | 1               | #VALUE! |
| 0           | T8    | D02      | 0     | 0          | kleiner LLOQ | #VALUE! | 1               | #VALUE! |
| 0           | T8    | D03      | 0     | 0          | kleiner LLOQ | #VALUE! | 1               | #VALUE! |
| 0           | T8    | D04      | 0     | 0          | kleiner LLOQ | #VALUE! | 1               | #VALUE! |
| 0           | T8    | D05      | 0     | 0          | kleiner LLOQ | #VALUE! | 1               | #VALUE! |
| 0           | T8    | D06      | 0     | 0          | kleiner LLOQ | #VALUE! | 1               | #VALUE! |
| 0           | T8    | D07      | 0     | 0          | kleiner LLOQ | #VALUE! | 1               | #VALUE! |
| 0           | T8    | D08      | 0     | 0          | kleiner LLOQ | #VALUE! | 1               | #VALUE! |
| 0           | T8    | D09      | 0     | 0          | kleiner LLOQ | #VALUE! | 1               | #VALUE! |
| 0           | T8    | D10      | 0     | 0          | kleiner LLOQ | #VALUE! | 1               | #VALUE! |
| 0           | T8    | D11      | 0     | 0          | kleiner LLOQ | #VALUE! | 1               | #VALUE! |
| 0           | T8    | D12      | 0     | 0          | kleiner LLOQ | #VALUE! | 1               | #VALUE! |

Plate: T8

| Test | Test | Test | Test | Test  | Test  | Test  | Test  | Test  | Test  | Test  | Test  | Test |
|------|------|------|------|-------|-------|-------|-------|-------|-------|-------|-------|------|
| 1    | 2    | 3    | 4    | 5     | 6     | 7     | 8     | 9     | 10    | 11    | 12    |      |
| A    |      |      |      | 0.635 | 0.607 | 0.628 | 0.661 | 0.404 | 0.309 | 0.229 | 0.222 |      |
| B    |      |      |      | 0.460 | 0.171 | 0.156 | 0.167 | 0.129 | 0.136 | 0.081 | 0.084 |      |
| C    |      |      |      | 0.458 | 0.708 | 0.553 | 0.584 | 0.670 | 0.659 | 0.222 | 0.224 |      |
| D    |      |      |      |       |       |       |       |       |       |       |       |      |
| E    |      |      |      |       |       |       |       |       |       |       |       |      |
| F    |      |      |      |       |       |       |       |       |       |       |       |      |
| G    |      |      |      |       |       | 0.053 | 0.055 | 0.053 | 0.054 | 0.053 | 0.053 |      |
| H    |      |      |      |       |       | 0.053 | 0.052 | 0.051 | 0.052 | 0.052 | 0.052 |      |

Plattenbelegung

|   | 1 | 2 | 3 | 4 | 5      | 6      | 7      | 8            | 9            | 10           | 11           | 12           |
|---|---|---|---|---|--------|--------|--------|--------------|--------------|--------------|--------------|--------------|
| A |   |   |   |   | T8HN1  | T8HN1  | T8HN2  | T8HN2        | T8HN3        | T8HN3        | T8HN4        | T8HN4        |
| B |   |   |   |   | T8HS11 | T8HS11 | T8HS12 | T8HS12       | T8HS13       | T8HS13       | T8HS14       | T8HS14       |
| C |   |   |   |   | T8HS21 | T8HS21 | T8HS22 | T8HS22       | T8HS23       | T8HS23       | T8HS24       | T8HS24       |
| D |   |   |   |   |        |        |        |              |              |              |              |              |
| E |   |   |   |   |        |        |        |              |              |              |              |              |
| F |   |   |   |   |        |        |        |              |              |              |              |              |
| G |   |   |   |   |        |        |        | Blank PEG    | Blank PEG    | Blank PEG    | Blank PEG    | Blank PEG    |
| H |   |   |   |   |        |        |        | Blank no PEG | Blank no PEG | Blank no PEG | Blank no PEG | Blank no PEG |

Samples aufgeteilt in lin high und low.höher konzentrierte Samples bei lin high zu finden.

Comment:

Date Operator

Date Control

|              |    |     |   |   |              |         |      |         |
|--------------|----|-----|---|---|--------------|---------|------|---------|
| 0            | T8 | E01 | 0 | 0 | kleiner LLOQ | #VALUE! | 1    | #VALUE! |
| 0            | T8 | E02 | 0 | 0 | kleiner LLOQ | #VALUE! | 1    | #VALUE! |
| 0            | T8 | E03 | 0 | 0 | kleiner LLOQ | #VALUE! | 1    | #VALUE! |
| 0            | T8 | E04 | 0 | 0 | kleiner LLOQ | #VALUE! | 1    | #VALUE! |
| 0            | T8 | E05 | 0 | 0 | kleiner LLOQ | #VALUE! | 1    | #VALUE! |
| 0            | T8 | E06 | 0 | 0 | kleiner LLOQ | #VALUE! | 1    | #VALUE! |
| 0            | T8 | E07 | 0 | 0 | kleiner LLOQ | #VALUE! | 1    | #VALUE! |
| 0            | T8 | E08 | 0 | 0 | kleiner LLOQ | #VALUE! | 1    | #VALUE! |
| 0            | T8 | E09 | 0 | 0 | kleiner LLOQ | #VALUE! | 1    | #VALUE! |
| 0            | T8 | E10 | 0 | 0 | kleiner LLOQ | #VALUE! | 1    | #VALUE! |
| 0            | T8 | E11 | 0 | 0 | kleiner LLOQ | #VALUE! | 1    | #VALUE! |
| 0            | T8 | E12 | 0 | 0 | kleiner LLOQ | #VALUE! | 1    | #VALUE! |
| 0            | T8 | F01 | 0 | 0 | kleiner LLOQ | #VALUE! | 1    | #VALUE! |
| 0            | T8 | F02 | 0 | 0 | kleiner LLOQ | #VALUE! | 1    | #VALUE! |
| 0            | T8 | F03 | 0 | 0 | kleiner LLOQ | #VALUE! | 1    | #VALUE! |
| 0            | T8 | F04 | 0 | 0 | kleiner LLOQ | #VALUE! | 1    | #VALUE! |
| 0            | T8 | F05 | 0 | 0 | kleiner LLOQ | #VALUE! | 1    | #VALUE! |
| 0            | T8 | F06 | 0 | 0 | kleiner LLOQ | #VALUE! | 1    | #VALUE! |
| 0            | T8 | F07 | 0 | 0 | kleiner LLOQ | #VALUE! | 1    | #VALUE! |
| 0            | T8 | F08 | 0 | 0 | kleiner LLOQ | #VALUE! | 1    | #VALUE! |
| 0            | T8 | F09 | 0 | 0 | kleiner LLOQ | #VALUE! | 1    | #VALUE! |
| 0            | T8 | F10 | 0 | 0 | kleiner LLOQ | #VALUE! | 1    | #VALUE! |
| 0            | T8 | F11 | 0 | 0 | kleiner LLOQ | #VALUE! | 1    | #VALUE! |
| 0            | T8 | F12 | 0 | 0 | kleiner LLOQ | #VALUE! | 1    | #VALUE! |
| 0            | T8 | G01 | 0 | 0 | kleiner LLOQ | #VALUE! | 1    | #VALUE! |
| 0            | T8 | G02 | 0 | 0 | kleiner LLOQ | #VALUE! | 1    | #VALUE! |
| 0            | T8 | G03 | 0 | 0 | kleiner LLOQ | #VALUE! | 1    | #VALUE! |
| 0            | T8 | G04 | 0 | 0 | kleiner LLOQ | #VALUE! | 1    | #VALUE! |
| 0            | T8 | G05 | 0 | 0 | kleiner LLOQ | #VALUE! | 1    | #VALUE! |
| 0            | T8 | G06 | 0 | 0 | kleiner LLOQ | #VALUE! | 1    | #VALUE! |
| Blank PEG    | T8 | G07 | 0 | 0 | kleiner LLOQ | #VALUE! | 2,75 | #VALUE! |
| Blank PEG    | T8 | G08 | 0 | 0 | kleiner LLOQ | #VALUE! | 2,75 | #VALUE! |
| Blank PEG    | T8 | G09 | 0 | 0 | kleiner LLOQ | #VALUE! | 2,75 | #VALUE! |
| Blank PEG    | T8 | G10 | 0 | 0 | kleiner LLOQ | #VALUE! | 2,75 | #VALUE! |
| Blank PEG    | T8 | G11 | 0 | 0 | kleiner LLOQ | #VALUE! | 2,75 | #VALUE! |
| Blank PEG    | T8 | G12 | 0 | 0 | kleiner LLOQ | #VALUE! | 2,75 | #VALUE! |
| 0            | T8 | H01 | 0 | 0 | kleiner LLOQ | #VALUE! | 1    | #VALUE! |
| 0            | T8 | H02 | 0 | 0 | kleiner LLOQ | #VALUE! | 1    | #VALUE! |
| 0            | T8 | H03 | 0 | 0 | kleiner LLOQ | #VALUE! | 1    | #VALUE! |
| 0            | T8 | H04 | 0 | 0 | kleiner LLOQ | #VALUE! | 1    | #VALUE! |
| 0            | T8 | H05 | 0 | 0 | kleiner LLOQ | #VALUE! | 1    | #VALUE! |
| 0            | T8 | H06 | 0 | 0 | kleiner LLOQ | #VALUE! | 1    | #VALUE! |
| Blank no PEG | T8 | H07 | 0 | 0 | kleiner LLOQ | #VALUE! | 2,75 | #VALUE! |
| Blank no PEG | T8 | H08 | 0 | 0 | kleiner LLOQ | #VALUE! | 2,75 | #VALUE! |
| Blank no PEG | T8 | H09 | 0 | 0 | kleiner LLOQ | #VALUE! | 2,75 | #VALUE! |
| Blank no PEG | T8 | H10 | 0 | 0 | kleiner LLOQ | #VALUE! | 2,75 | #VALUE! |
| Blank no PEG | T8 | H11 | 0 | 0 | kleiner LLOQ | #VALUE! | 2,75 | #VALUE! |
| Blank no PEG | T8 | H12 | 0 | 0 | kleiner LLOQ | #VALUE! | 2,75 | #VALUE! |

|        |    |     |       |       |              |              |         |         |         |
|--------|----|-----|-------|-------|--------------|--------------|---------|---------|---------|
| 0      | T9 | A01 | 0     | 0     | kleiner LLOQ | #VALUE!      | 1       | #VALUE! |         |
| 0      | T9 | A02 | 0     | 0     | kleiner LLOQ | #VALUE!      | 1       | #VALUE! |         |
| 0      | T9 | A03 | 0     | 0     | kleiner LLOQ | #VALUE!      | 1       | #VALUE! |         |
| 0      | T9 | A04 | 0     | 0     | kleiner LLOQ | #VALUE!      | 1       | #VALUE! |         |
| T9HN1  | T9 | A05 | 0.379 | 0.328 | 0.328        | 0.014        | 2.75    | 0.038   |         |
| T9HN1  | T9 | A06 | 0.370 | 0.319 | 0.319        | 0.014        | 2.75    | 0.037   |         |
| T9HN2  | T9 | A07 | 0.484 | 0.433 | 0.433        | 0.019        | 2.75    | 0.052   |         |
| T9HN2  | T9 | A08 | 0.478 | 0.427 | 0.427        | 0.019        | 2.75    | 0.051   |         |
| T9HN3  | T9 | A09 | 0.220 | 0.169 | 0.169        | 0.006        | 2.75    | 0.018   |         |
| T9HN3  | T9 | A10 | 0.291 | 0.240 | 0.240        | 0.010        | 2.75    | 0.027   |         |
| T9HN4  | T9 | A11 | 0.404 | 0.353 | 0.353        | 0.015        | 2.75    | 0.042   |         |
| T9HN4  | T9 | A12 | 0.398 | 0.347 | 0.347        | 0.015        | 2.75    | 0.041   |         |
| 0      | T9 | B01 | 0     | 0     | kleiner LLOQ | #VALUE!      | 1       | #VALUE! |         |
| 0      | T9 | B02 | 0     | 0     | kleiner LLOQ | #VALUE!      | 1       | #VALUE! |         |
| 0      | T9 | B03 | 0     | 0     | kleiner LLOQ | #VALUE!      | 1       | #VALUE! |         |
| 0      | T9 | B04 | 0     | 0     | kleiner LLOQ | #VALUE!      | 1       | #VALUE! |         |
| T9HS11 | T9 | B05 | 0.157 | 0.106 | 0.106        | kleiner LLOQ | #VALUE! | 2.75    | #VALUE! |
| T9HS11 | T9 | B06 | 0.155 | 0.104 | 0.104        | kleiner LLOQ | #VALUE! | 2.75    | #VALUE! |
| T9HS12 | T9 | B07 | 0.155 | 0.104 | 0.104        | kleiner LLOQ | #VALUE! | 2.75    | #VALUE! |
| T9HS12 | T9 | B08 | 0.157 | 0.106 | 0.106        | kleiner LLOQ | #VALUE! | 2.75    | #VALUE! |
| T9HS13 | T9 | B09 | 0.194 | 0.143 | 0.143        | kleiner LLOQ | #VALUE! | 2.75    | #VALUE! |
| T9HS13 | T9 | B10 | 0.200 | 0.149 | 0.149        | kleiner LLOQ | #VALUE! | 2.75    | #VALUE! |
| T9HS14 | T9 | B11 | 0.080 | 0.030 | 0.030        | kleiner LLOQ | #VALUE! | 2.75    | #VALUE! |
| T9HS14 | T9 | B12 | 0.091 | 0.040 | 0.040        | kleiner LLOQ | #VALUE! | 2.75    | #VALUE! |
| 0      | T9 | C01 | 0     | 0     | kleiner LLOQ | #VALUE!      | 1       | #VALUE! |         |
| 0      | T9 | C02 | 0     | 0     | kleiner LLOQ | #VALUE!      | 1       | #VALUE! |         |
| 0      | T9 | C03 | 0     | 0     | kleiner LLOQ | #VALUE!      | 1       | #VALUE! |         |
| 0      | T9 | C04 | 0     | 0     | kleiner LLOQ | #VALUE!      | 1       | #VALUE! |         |
| T9HS21 | T9 | C05 | 0.623 | 0.573 | 0.573        | 0.026        | 2.75    | 0.070   |         |
| T9HS21 | T9 | C06 | 0.633 | 0.582 | 0.582        | 0.026        | 2.75    | 0.072   |         |
| T9HS22 | T9 | C07 | 0.542 | 0.491 | 0.491        | 0.022        | 2.75    | 0.060   |         |
| T9HS22 | T9 | C08 | 0.548 | 0.497 | 0.497        | 0.022        | 2.75    | 0.061   |         |
| T9HS23 | T9 | C09 | 0.625 | 0.574 | 0.574        | 0.026        | 2.75    | 0.071   |         |
| T9HS23 | T9 | C10 | 0.640 | 0.589 | 0.589        | 0.026        | 2.75    | 0.073   |         |
| T9HS24 | T9 | C11 | 0.197 | 0.146 | 0.146        | kleiner LLOQ | #VALUE! | 2.75    | #VALUE! |
| T9HS24 | T9 | C12 | 0.192 | 0.141 | 0.141        | kleiner LLOQ | #VALUE! | 2.75    | #VALUE! |
| 0      | T9 | D01 | 0     | 0     | kleiner LLOQ | #VALUE!      | 1       | #VALUE! |         |
| 0      | T9 | D02 | 0     | 0     | kleiner LLOQ | #VALUE!      | 1       | #VALUE! |         |
| 0      | T9 | D03 | 0     | 0     | kleiner LLOQ | #VALUE!      | 1       | #VALUE! |         |
| 0      | T9 | D04 | 0     | 0     | kleiner LLOQ | #VALUE!      | 1       | #VALUE! |         |
| 0      | T9 | D05 | 0     | 0     | kleiner LLOQ | #VALUE!      | 1       | #VALUE! |         |
| 0      | T9 | D06 | 0     | 0     | kleiner LLOQ | #VALUE!      | 1       | #VALUE! |         |
| 0      | T9 | D07 | 0     | 0     | kleiner LLOQ | #VALUE!      | 1       | #VALUE! |         |
| 0      | T9 | D08 | 0     | 0     | kleiner LLOQ | #VALUE!      | 1       | #VALUE! |         |
| 0      | T9 | D09 | 0     | 0     | kleiner LLOQ | #VALUE!      | 1       | #VALUE! |         |
| 0      | T9 | D10 | 0     | 0     | kleiner LLOQ | #VALUE!      | 1       | #VALUE! |         |
| 0      | T9 | D11 | 0     | 0     | kleiner LLOQ | #VALUE!      | 1       | #VALUE! |         |
| 0      | T9 | D12 | 0     | 0     | kleiner LLOQ | #VALUE!      | 1       | #VALUE! |         |

Plate: T9

|   |   |   |   |   |       |       |       |       |       |       |       |       |
|---|---|---|---|---|-------|-------|-------|-------|-------|-------|-------|-------|
|   | 1 | 2 | 3 | 4 | 5     | 6     | 7     | 8     | 9     | 10    | 11    | 12    |
| A |   |   |   |   | 0.379 | 0.370 | 0.484 | 0.478 | 0.220 | 0.291 | 0.404 | 0.398 |
| B |   |   |   |   | 0.157 | 0.155 | 0.155 | 0.157 | 0.194 | 0.200 | 0.080 | 0.091 |
| C |   |   |   |   | 0.623 | 0.633 | 0.542 | 0.548 | 0.625 | 0.640 | 0.197 | 0.192 |
| D |   |   |   |   |       |       |       |       |       |       |       |       |
| E |   |   |   |   |       |       |       |       |       |       |       |       |
| F |   |   |   |   |       |       |       |       |       |       |       |       |
| G |   |   |   |   |       |       | 0.051 | 0.051 | 0.051 | 0.051 | 0.051 | 0.050 |
| H |   |   |   |   |       |       | 0.050 | 0.049 | 0.050 | 0.049 | 0.050 | 0.050 |

Plattenbelegung

|   |   |   |   |   |        |        |              |              |              |              |              |              |
|---|---|---|---|---|--------|--------|--------------|--------------|--------------|--------------|--------------|--------------|
|   | 1 | 2 | 3 | 4 | 5      | 6      | 7            | 8            | 9            | 10           | 11           | 12           |
| A |   |   |   |   | T9HN1  | T9HN1  | T9HN2        | T9HN2        | T9HN3        | T9HN3        | T9HN4        | T9HN4        |
| B |   |   |   |   | T9HS11 | T9HS11 | T9HS12       | T9HS12       | T9HS13       | T9HS13       | T9HS14       | T9HS14       |
| C |   |   |   |   | T9HS21 | T9HS21 | T9HS22       | T9HS22       | T9HS23       | T9HS23       | T9HS24       | T9HS24       |
| D |   |   |   |   |        |        |              |              |              |              |              |              |
| E |   |   |   |   |        |        |              |              |              |              |              |              |
| F |   |   |   |   |        |        |              |              |              |              |              |              |
| G |   |   |   |   |        |        | Blank PEG    | Blank PEG    | Blank PEG    | Blank PEG    | Blank PEG    | Blank PEG    |
| H |   |   |   |   |        |        | Blank no PEG | Blank no PEG | Blank no PEG | Blank no PEG | Blank no PEG | Blank no PEG |

Comment:

Date Operator Date Control



|              |     |     |       |        |              |         |      |         |
|--------------|-----|-----|-------|--------|--------------|---------|------|---------|
| 0            | T9  | E01 | 0     | 0      | kleiner LLOQ | #VALUE! | 1    | #VALUE! |
| 0            | T9  | E02 | 0     | 0      | kleiner LLOQ | #VALUE! | 1    | #VALUE! |
| 0            | T9  | E03 | 0     | 0      | kleiner LLOQ | #VALUE! | 1    | #VALUE! |
| 0            | T9  | E04 | 0     | 0      | kleiner LLOQ | #VALUE! | 1    | #VALUE! |
| 0            | T9  | E05 | 0     | 0      | kleiner LLOQ | #VALUE! | 1    | #VALUE! |
| 0            | T9  | E06 | 0     | 0      | kleiner LLOQ | #VALUE! | 1    | #VALUE! |
| 0            | T9  | E07 | 0     | 0      | kleiner LLOQ | #VALUE! | 1    | #VALUE! |
| 0            | T9  | E08 | 0     | 0      | kleiner LLOQ | #VALUE! | 1    | #VALUE! |
| 0            | T9  | E09 | 0     | 0      | kleiner LLOQ | #VALUE! | 1    | #VALUE! |
| 0            | T9  | E10 | 0     | 0      | kleiner LLOQ | #VALUE! | 1    | #VALUE! |
| 0            | T9  | E11 | 0     | 0      | kleiner LLOQ | #VALUE! | 1    | #VALUE! |
| 0            | T9  | E12 | 0     | 0      | kleiner LLOQ | #VALUE! | 1    | #VALUE! |
| 0            | T9  | F01 | 0     | 0      | kleiner LLOQ | #VALUE! | 1    | #VALUE! |
| 0            | T9  | F02 | 0     | 0      | kleiner LLOQ | #VALUE! | 1    | #VALUE! |
| 0            | T9  | F03 | 0     | 0      | kleiner LLOQ | #VALUE! | 1    | #VALUE! |
| 0            | T9  | F04 | 0     | 0      | kleiner LLOQ | #VALUE! | 1    | #VALUE! |
| 0            | T9  | F05 | 0     | 0      | kleiner LLOQ | #VALUE! | 1    | #VALUE! |
| 0            | T9  | F06 | 0     | 0      | kleiner LLOQ | #VALUE! | 1    | #VALUE! |
| 0            | T9  | F07 | 0     | 0      | kleiner LLOQ | #VALUE! | 1    | #VALUE! |
| 0            | T9  | F08 | 0     | 0      | kleiner LLOQ | #VALUE! | 1    | #VALUE! |
| 0            | T9  | F09 | 0     | 0      | kleiner LLOQ | #VALUE! | 1    | #VALUE! |
| 0            | T9  | F10 | 0     | 0      | kleiner LLOQ | #VALUE! | 1    | #VALUE! |
| 0            | T9  | F11 | 0     | 0      | kleiner LLOQ | #VALUE! | 1    | #VALUE! |
| 0            | T9  | F12 | 0     | 0      | kleiner LLOQ | #VALUE! | 1    | #VALUE! |
| 0            | T9  | G01 | 0     | 0      | kleiner LLOQ | #VALUE! | 1    | #VALUE! |
| 0            | T9  | G02 | 0     | 0      | kleiner LLOQ | #VALUE! | 1    | #VALUE! |
| 0            | T9  | G03 | 0     | 0      | kleiner LLOQ | #VALUE! | 1    | #VALUE! |
| 0            | T9  | G04 | 0     | 0      | kleiner LLOQ | #VALUE! | 1    | #VALUE! |
| 0            | T9  | G05 | 0     | 0      | kleiner LLOQ | #VALUE! | 1    | #VALUE! |
| 0            | T9  | G06 | 0     | 0      | kleiner LLOQ | #VALUE! | 1    | #VALUE! |
| Blank PEG    | T9  | G07 | 0     | 0      | kleiner LLOQ | #VALUE! | 2.75 | #VALUE! |
| Blank PEG    | T9  | G08 | 0     | 0      | kleiner LLOQ | #VALUE! | 2.75 | #VALUE! |
| Blank PEG    | T9  | G09 | 0     | 0      | kleiner LLOQ | #VALUE! | 2.75 | #VALUE! |
| Blank PEG    | T9  | G10 | 0     | 0      | kleiner LLOQ | #VALUE! | 2.75 | #VALUE! |
| Blank PEG    | T9  | G11 | 0     | 0      | kleiner LLOQ | #VALUE! | 2.75 | #VALUE! |
| Blank PEG    | T9  | G12 | 0     | 0      | kleiner LLOQ | #VALUE! | 2.75 | #VALUE! |
| 0            | T9  | H01 | 0     | 0      | kleiner LLOQ | #VALUE! | 1    | #VALUE! |
| 0            | T9  | H02 | 0     | 0      | kleiner LLOQ | #VALUE! | 1    | #VALUE! |
| 0            | T9  | H03 | 0     | 0      | kleiner LLOQ | #VALUE! | 1    | #VALUE! |
| 0            | T9  | H04 | 0     | 0      | kleiner LLOQ | #VALUE! | 1    | #VALUE! |
| 0            | T9  | H05 | 0     | 0      | kleiner LLOQ | #VALUE! | 1    | #VALUE! |
| 0            | T9  | H06 | 0     | 0      | kleiner LLOQ | #VALUE! | 1    | #VALUE! |
| Blank no PEG | T9  | H07 | 0     | 0      | kleiner LLOQ | #VALUE! | 2.75 | #VALUE! |
| Blank no PEG | T9  | H08 | 0     | 0      | kleiner LLOQ | #VALUE! | 2.75 | #VALUE! |
| Blank no PEG | T9  | H09 | 0     | 0      | kleiner LLOQ | #VALUE! | 2.75 | #VALUE! |
| Blank no PEG | T9  | H10 | 0     | 0      | kleiner LLOQ | #VALUE! | 2.75 | #VALUE! |
| Blank no PEG | T9  | H11 | 0     | 0      | kleiner LLOQ | #VALUE! | 2.75 | #VALUE! |
| Blank no PEG | T9  | H12 | 0     | 0      | kleiner LLOQ | #VALUE! | 2.75 | #VALUE! |
| 0            | T10 | A01 | 0     | 0      | kleiner LLOQ | #VALUE! | 1    | #VALUE! |
| 0            | T10 | A02 | 0     | 0      | kleiner LLOQ | #VALUE! | 1    | #VALUE! |
| 0            | T10 | A03 | 0     | 0      | kleiner LLOQ | #VALUE! | 1    | #VALUE! |
| 0            | T10 | A04 | 0     | 0      | kleiner LLOQ | #VALUE! | 1    | #VALUE! |
| T10HN1       | T10 | A05 | 0.337 | 0.286  | 0.286        | 0.012   | 2.75 | 0.033   |
| T10HN1       | T10 | A06 | 0.335 | 0.285  | 0.285        | 0.012   | 2.75 | 0.033   |
| T10HN2       | T10 | A07 | 0.457 | 0.406  | 0.406        | 0.018   | 2.75 | 0.049   |
| T10HN2       | T10 | A08 | 0.454 | 0.403  | 0.403        | 0.018   | 2.75 | 0.048   |
| T10HN3       | T10 | A09 | 0.421 | 0.370  | 0.370        | 0.016   | 2.75 | 0.044   |
| T10HN3       | T10 | A10 | 0.439 | 0.388  | 0.388        | 0.017   | 2.75 | 0.046   |
| T10HN4       | T10 | A11 | 0.367 | 0.316  | 0.316        | 0.013   | 2.75 | 0.037   |
| T10HN4       | T10 | A12 | 0.373 | 0.322  | 0.322        | 0.014   | 2.75 | 0.038   |
| 0            | T10 | B01 | 0     | 0      | kleiner LLOQ | #VALUE! | 1    | #VALUE! |
| 0            | T10 | B02 | 0     | 0      | kleiner LLOQ | #VALUE! | 1    | #VALUE! |
| 0            | T10 | B03 | 0     | 0      | kleiner LLOQ | #VALUE! | 1    | #VALUE! |
| 0            | T10 | B04 | 0     | 0      | kleiner LLOQ | #VALUE! | 1    | #VALUE! |
| T10HS11      | T10 | B05 | 0.137 | 0.086  | kleiner LLOQ | #VALUE! | 2.75 | #VALUE! |
| T10HS11      | T10 | B06 | 0.138 | 0.087  | kleiner LLOQ | #VALUE! | 2.75 | #VALUE! |
| T10HS12      | T10 | B07 | 0.156 | 0.105  | kleiner LLOQ | #VALUE! | 2.75 | #VALUE! |
| T10HS12      | T10 | B08 | 0.166 | 0.115  | kleiner LLOQ | #VALUE! | 2.75 | #VALUE! |
| T10HS13      | T10 | B09 | 0.178 | 0.127  | kleiner LLOQ | #VALUE! | 2.75 | #VALUE! |
| T10HS13      | T10 | B10 | 0.182 | 0.131  | kleiner LLOQ | #VALUE! | 2.75 | #VALUE! |
| T10HS14      | T10 | B11 | 0.087 | 0.037  | kleiner LLOQ | #VALUE! | 2.75 | #VALUE! |
| T10HS14      | T10 | B12 | 0.082 | 0.031  | kleiner LLOQ | #VALUE! | 2.75 | #VALUE! |
| 0            | T10 | C01 | 0.000 | -0.051 | kleiner LLOQ | #VALUE! | 1    | #VALUE! |

Plate: T10

|   | 1 | 2 | 3 | 4 | 5     | 6     | 7     | 8     | 9     | 10    | 11    | 12    |
|---|---|---|---|---|-------|-------|-------|-------|-------|-------|-------|-------|
| A |   |   |   |   | 0.337 | 0.335 | 0.457 | 0.454 | 0.421 | 0.439 | 0.367 | 0.373 |
| B |   |   |   |   | 0.137 | 0.138 | 0.156 | 0.166 | 0.178 | 0.182 | 0.087 | 0.082 |
| C |   |   |   |   | 0.645 | 0.646 | 0.519 | 0.550 | 0.557 | 0.572 | 0.193 | 0.182 |
| D |   |   |   |   |       |       |       |       |       |       |       |       |
| E |   |   |   |   |       |       |       |       |       |       |       |       |
| F |   |   |   |   |       |       |       |       |       |       |       |       |
| G |   |   |   |   |       |       | 0.051 | 0.051 | 0.051 | 0.053 | 0.051 | 0.054 |
| H |   |   |   |   |       |       | 0.050 | 0.050 | 0.052 | 0.051 | 0.050 | 0.050 |

Plattenbelegung

|   | 1 | 2 | 3 | 4 | 5       | 6       | 7       | 8       | 9       | 10      | 11      | 12      |
|---|---|---|---|---|---------|---------|---------|---------|---------|---------|---------|---------|
| A |   |   |   |   | T10HN1  | T10HN1  | T10HN2  | T10HN2  | T10HN3  | T10HN3  | T10HN4  | T10HN4  |
| B |   |   |   |   | T10HS11 | T10HS11 | T10HS12 | T10HS12 | T10HS13 | T10HS13 | T10HS14 | T10HS14 |
| C |   |   |   |   | T10HS21 | T10HS21 | T10HS22 | T10HS22 | T10HS23 | T10HS23 | T10HS24 | T10HS24 |
| D |   |   |   |   |         |         |         |         |         |         |         |         |
| E |   |   |   |   |         |         |         |         |         |         |         |         |

|              |     |     |       |        |              |         |      |         |   |  |  |  |  |  |              |              |              |              |              |
|--------------|-----|-----|-------|--------|--------------|---------|------|---------|---|--|--|--|--|--|--------------|--------------|--------------|--------------|--------------|
| 0            | T10 | C02 | 0.000 | -0.051 | kleiner LLOQ | #VALUE! | 1    | #VALUE! | F |  |  |  |  |  |              |              |              |              |              |
| 0            | T10 | C03 | 0.000 | -0.051 | kleiner LLOQ | #VALUE! | 1    | #VALUE! | G |  |  |  |  |  | Blank PEG    | Blank PEG    | Blank PEG    | Blank PEG    | Blank PEG    |
| 0            | T10 | C04 | 0.000 | -0.051 | kleiner LLOQ | #VALUE! | 1    | #VALUE! | H |  |  |  |  |  | Blank no PEG | Blank no PEG | Blank no PEG | Blank no PEG | Blank no PEG |
| T10HS21      | T10 | C05 | 0.645 | 0.594  | 0.594        | 0.027   | 2.75 | 0.073   |   |  |  |  |  |  |              |              |              |              |              |
| T10HS21      | T10 | C06 | 0.646 | 0.595  | 0.595        | 0.027   | 2.75 | 0.073   |   |  |  |  |  |  |              |              |              |              |              |
| T10HS22      | T10 | C07 | 0.519 | 0.468  | 0.468        | 0.021   | 2.75 | 0.057   |   |  |  |  |  |  |              |              |              |              |              |
| T10HS22      | T10 | C08 | 0.550 | 0.499  | 0.499        | 0.022   | 2.75 | 0.061   |   |  |  |  |  |  |              |              |              |              |              |
| T10HS23      | T10 | C09 | 0.557 | 0.506  | 0.506        | 0.022   | 2.75 | 0.062   |   |  |  |  |  |  |              |              |              |              |              |
| T10HS23      | T10 | C10 | 0.572 | 0.521  | 0.521        | 0.023   | 2.75 | 0.064   |   |  |  |  |  |  |              |              |              |              |              |
| T10HS24      | T10 | C11 | 0.193 | 0.142  | kleiner LLOQ | #VALUE! | 2.75 | #VALUE! |   |  |  |  |  |  |              |              |              |              |              |
| T10HS24      | T10 | C12 | 0.182 | 0.131  | kleiner LLOQ | #VALUE! | 2.75 | #VALUE! |   |  |  |  |  |  |              |              |              |              |              |
| 0            | T10 | D01 | 0.000 | -0.051 | kleiner LLOQ | #VALUE! | 1    | #VALUE! |   |  |  |  |  |  |              |              |              |              |              |
| 0            | T10 | D02 | 0.000 | -0.051 | kleiner LLOQ | #VALUE! | 1    | #VALUE! |   |  |  |  |  |  |              |              |              |              |              |
| 0            | T10 | D03 | 0.000 | -0.051 | kleiner LLOQ | #VALUE! | 1    | #VALUE! |   |  |  |  |  |  |              |              |              |              |              |
| 0            | T10 | D04 | 0     | 0      | kleiner LLOQ | #VALUE! | 1    | #VALUE! |   |  |  |  |  |  |              |              |              |              |              |
| 0            | T10 | D05 | 0     | 0      | kleiner LLOQ | #VALUE! | 1    | #VALUE! |   |  |  |  |  |  |              |              |              |              |              |
| 0            | T10 | D06 | 0     | 0      | kleiner LLOQ | #VALUE! | 1    | #VALUE! |   |  |  |  |  |  |              |              |              |              |              |
| 0            | T10 | D07 | 0     | 0      | kleiner LLOQ | #VALUE! | 1    | #VALUE! |   |  |  |  |  |  |              |              |              |              |              |
| 0            | T10 | D08 | 0     | 0      | kleiner LLOQ | #VALUE! | 1    | #VALUE! |   |  |  |  |  |  |              |              |              |              |              |
| 0            | T10 | D09 | 0     | 0      | kleiner LLOQ | #VALUE! | 1    | #VALUE! |   |  |  |  |  |  |              |              |              |              |              |
| 0            | T10 | D10 | 0     | 0      | kleiner LLOQ | #VALUE! | 1    | #VALUE! |   |  |  |  |  |  |              |              |              |              |              |
| 0            | T10 | D11 | 0     | 0      | kleiner LLOQ | #VALUE! | 1    | #VALUE! |   |  |  |  |  |  |              |              |              |              |              |
| 0            | T10 | D12 | 0     | 0      | kleiner LLOQ | #VALUE! | 1    | #VALUE! |   |  |  |  |  |  |              |              |              |              |              |
| 0            | T10 | E01 | 0     | 0      | kleiner LLOQ | #VALUE! | 1    | #VALUE! |   |  |  |  |  |  |              |              |              |              |              |
| 0            | T10 | E02 | 0     | 0      | kleiner LLOQ | #VALUE! | 1    | #VALUE! |   |  |  |  |  |  |              |              |              |              |              |
| 0            | T10 | E03 | 0     | 0      | kleiner LLOQ | #VALUE! | 1    | #VALUE! |   |  |  |  |  |  |              |              |              |              |              |
| 0            | T10 | E04 | 0     | 0      | kleiner LLOQ | #VALUE! | 1    | #VALUE! |   |  |  |  |  |  |              |              |              |              |              |
| 0            | T10 | E05 | 0     | 0      | kleiner LLOQ | #VALUE! | 1    | #VALUE! |   |  |  |  |  |  |              |              |              |              |              |
| 0            | T10 | E06 | 0     | 0      | kleiner LLOQ | #VALUE! | 1    | #VALUE! |   |  |  |  |  |  |              |              |              |              |              |
| 0            | T10 | E07 | 0     | 0      | kleiner LLOQ | #VALUE! | 1    | #VALUE! |   |  |  |  |  |  |              |              |              |              |              |
| 0            | T10 | E08 | 0     | 0      | kleiner LLOQ | #VALUE! | 1    | #VALUE! |   |  |  |  |  |  |              |              |              |              |              |
| 0            | T10 | E09 | 0     | 0      | kleiner LLOQ | #VALUE! | 1    | #VALUE! |   |  |  |  |  |  |              |              |              |              |              |
| 0            | T10 | E10 | 0     | 0      | kleiner LLOQ | #VALUE! | 1    | #VALUE! |   |  |  |  |  |  |              |              |              |              |              |
| 0            | T10 | E11 | 0     | 0      | kleiner LLOQ | #VALUE! | 1    | #VALUE! |   |  |  |  |  |  |              |              |              |              |              |
| 0            | T10 | E12 | 0     | 0      | kleiner LLOQ | #VALUE! | 1    | #VALUE! |   |  |  |  |  |  |              |              |              |              |              |
| 0            | T10 | F01 | 0     | 0      | kleiner LLOQ | #VALUE! | 1    | #VALUE! |   |  |  |  |  |  |              |              |              |              |              |
| 0            | T10 | F02 | 0     | 0      | kleiner LLOQ | #VALUE! | 1    | #VALUE! |   |  |  |  |  |  |              |              |              |              |              |
| 0            | T10 | F03 | 0     | 0      | kleiner LLOQ | #VALUE! | 1    | #VALUE! |   |  |  |  |  |  |              |              |              |              |              |
| 0            | T10 | F04 | 0     | 0      | kleiner LLOQ | #VALUE! | 1    | #VALUE! |   |  |  |  |  |  |              |              |              |              |              |
| 0            | T10 | F05 | 0     | 0      | kleiner LLOQ | #VALUE! | 1    | #VALUE! |   |  |  |  |  |  |              |              |              |              |              |
| 0            | T10 | F06 | 0     | 0      | kleiner LLOQ | #VALUE! | 1    | #VALUE! |   |  |  |  |  |  |              |              |              |              |              |
| 0            | T10 | F07 | 0     | 0      | kleiner LLOQ | #VALUE! | 1    | #VALUE! |   |  |  |  |  |  |              |              |              |              |              |
| 0            | T10 | F08 | 0     | 0      | kleiner LLOQ | #VALUE! | 1    | #VALUE! |   |  |  |  |  |  |              |              |              |              |              |
| 0            | T10 | F09 | 0     | 0      | kleiner LLOQ | #VALUE! | 1    | #VALUE! |   |  |  |  |  |  |              |              |              |              |              |
| 0            | T10 | F10 | 0     | 0      | kleiner LLOQ | #VALUE! | 1    | #VALUE! |   |  |  |  |  |  |              |              |              |              |              |
| 0            | T10 | F11 | 0     | 0      | kleiner LLOQ | #VALUE! | 1    | #VALUE! |   |  |  |  |  |  |              |              |              |              |              |
| 0            | T10 | F12 | 0     | 0      | kleiner LLOQ | #VALUE! | 1    | #VALUE! |   |  |  |  |  |  |              |              |              |              |              |
| 0            | T10 | G01 | 0     | 0      | kleiner LLOQ | #VALUE! | 1    | #VALUE! |   |  |  |  |  |  |              |              |              |              |              |
| 0            | T10 | G02 | 0     | 0      | kleiner LLOQ | #VALUE! | 1    | #VALUE! |   |  |  |  |  |  |              |              |              |              |              |
| 0            | T10 | G03 | 0     | 0      | kleiner LLOQ | #VALUE! | 1    | #VALUE! |   |  |  |  |  |  |              |              |              |              |              |
| 0            | T10 | G04 | 0     | 0      | kleiner LLOQ | #VALUE! | 1    | #VALUE! |   |  |  |  |  |  |              |              |              |              |              |
| 0            | T10 | G05 | 0     | 0      | kleiner LLOQ | #VALUE! | 1    | #VALUE! |   |  |  |  |  |  |              |              |              |              |              |
| 0            | T10 | G06 | 0     | 0      | kleiner LLOQ | #VALUE! | 1    | #VALUE! |   |  |  |  |  |  |              |              |              |              |              |
| Blank PEG    | T10 | G07 | 0     | 0      | kleiner LLOQ | #VALUE! | 2.75 | #VALUE! |   |  |  |  |  |  |              |              |              |              |              |
| Blank PEG    | T10 | G08 | 0     | 0      | kleiner LLOQ | #VALUE! | 2.75 | #VALUE! |   |  |  |  |  |  |              |              |              |              |              |
| Blank PEG    | T10 | G09 | 0     | 0      | kleiner LLOQ | #VALUE! | 2.75 | #VALUE! |   |  |  |  |  |  |              |              |              |              |              |
| Blank PEG    | T10 | G10 | 0     | 0      | kleiner LLOQ | #VALUE! | 2.75 | #VALUE! |   |  |  |  |  |  |              |              |              |              |              |
| Blank PEG    | T10 | G11 | 0     | 0      | kleiner LLOQ | #VALUE! | 2.75 | #VALUE! |   |  |  |  |  |  |              |              |              |              |              |
| Blank PEG    | T10 | G12 | 0     | 0      | kleiner LLOQ | #VALUE! | 2.75 | #VALUE! |   |  |  |  |  |  |              |              |              |              |              |
| 0            | T10 | H01 | 0     | 0      | kleiner LLOQ | #VALUE! | 1    | #VALUE! |   |  |  |  |  |  |              |              |              |              |              |
| 0            | T10 | H02 | 0     | 0      | kleiner LLOQ | #VALUE! | 1    | #VALUE! |   |  |  |  |  |  |              |              |              |              |              |
| 0            | T10 | H03 | 0     | 0      | kleiner LLOQ | #VALUE! | 1    | #VALUE! |   |  |  |  |  |  |              |              |              |              |              |
| 0            | T10 | H04 | 0     | 0      | kleiner LLOQ | #VALUE! | 1    | #VALUE! |   |  |  |  |  |  |              |              |              |              |              |
| 0            | T10 | H05 | 0     | 0      | kleiner LLOQ | #VALUE! | 1    | #VALUE! |   |  |  |  |  |  |              |              |              |              |              |
| 0            | T10 | H06 | 0     | 0      | kleiner LLOQ | #VALUE! | 1    | #VALUE! |   |  |  |  |  |  |              |              |              |              |              |
| Blank no PEG | T10 | H07 | 0     | 0      | kleiner LLOQ | #VALUE! | 2.75 | #VALUE! |   |  |  |  |  |  |              |              |              |              |              |
| Blank no PEG | T10 | H08 | 0     | 0      | kleiner LLOQ | #VALUE! | 2.75 | #VALUE! |   |  |  |  |  |  |              |              |              |              |              |
| Blank no PEG | T10 | H09 | 0     | 0      | kleiner LLOQ | #VALUE! | 2.75 | #VALUE! |   |  |  |  |  |  |              |              |              |              |              |
| Blank no PEG | T10 | H10 | 0     | 0      | kleiner LLOQ | #VALUE! | 2.75 | #VALUE! |   |  |  |  |  |  |              |              |              |              |              |
| Blank no PEG | T10 | H11 | 0     | 0      | kleiner LLOQ | #VALUE! | 2.75 | #VALUE! |   |  |  |  |  |  |              |              |              |              |              |
| Blank no PEG | T10 | H12 | 0     | 0      | kleiner LLOQ | #VALUE! | 2.75 | #VALUE! |   |  |  |  |  |  |              |              |              |              |              |
| 0            | T11 | A01 | 0     | 0      | kleiner LLOQ | #VALUE! | 1    | #VALUE! |   |  |  |  |  |  |              |              |              |              |              |
| 0            | T11 | A02 | 0     | 0      | kleiner LLOQ | #VALUE! | 1    | #VALUE! |   |  |  |  |  |  |              |              |              |              |              |
| 0            | T11 | A03 | 0     | 0      | kleiner LLOQ | #VALUE! | 1    | #VALUE! |   |  |  |  |  |  |              |              |              |              |              |
| 0            | T11 | A04 | 0     | 0      | kleiner LLOQ | #VALUE! | 1    | #VALUE! |   |  |  |  |  |  |              |              |              |              |              |
| T11HN1       | T11 | A05 | 0.502 | 0.451  | 0.451        | 0.020   | 2.75 | 0.055   |   |  |  |  |  |  |              |              |              |              |              |

Comment:

Date Operator Date Control

|           |     |     |       |        |              |         |      |         |
|-----------|-----|-----|-------|--------|--------------|---------|------|---------|
| T11HN1    | T11 | A06 | 0.545 | 0.494  | 0.494        | 0.022   | 2.75 | 0.060   |
| T11HN2    | T11 | A07 | 0.613 | 0.562  | 0.562        | 0.025   | 2.75 | 0.069   |
| T11HN2    | T11 | A08 | 0.593 | 0.543  | 0.543        | 0.024   | 2.75 | 0.066   |
| T11HN3    | T11 | A09 | 0.579 | 0.528  | 0.528        | 0.023   | 2.75 | 0.065   |
| T11HN3    | T11 | A10 | 0.537 | 0.486  | 0.486        | 0.021   | 2.75 | 0.059   |
| T11HN4    | T11 | A11 | 0.385 | 0.334  | 0.334        | 0.014   | 2.75 | 0.039   |
| T11HN4    | T11 | A12 | 0.388 | 0.337  | 0.337        | 0.014   | 2.75 | 0.040   |
| 0         | T11 | B01 | 0.000 | -0.051 | kleiner LLOQ | #VALUE! | 1    | #VALUE! |
| 0         | T11 | B02 | 0.000 | -0.051 | kleiner LLOQ | #VALUE! | 1    | #VALUE! |
| 0         | T11 | B03 | 0.000 | -0.051 | kleiner LLOQ | #VALUE! | 1    | #VALUE! |
| 0         | T11 | B04 | 0.000 | -0.051 | kleiner LLOQ | #VALUE! | 1    | #VALUE! |
| T11HS11   | T11 | B05 | 0.206 | 0.156  | kleiner LLOQ | #VALUE! | 2.75 | #VALUE! |
| T11HS11   | T11 | B06 | 0.205 | 0.154  | kleiner LLOQ | #VALUE! | 2.75 | #VALUE! |
| T11HS12   | T11 | B07 | 0.187 | 0.136  | kleiner LLOQ | #VALUE! | 2.75 | #VALUE! |
| T11HS12   | T11 | B08 | 0.189 | 0.138  | kleiner LLOQ | #VALUE! | 2.75 | #VALUE! |
| T11HS13   | T11 | B09 | 0.187 | 0.136  | kleiner LLOQ | #VALUE! | 2.75 | #VALUE! |
| T11HS13   | T11 | B10 | 0.177 | 0.126  | kleiner LLOQ | #VALUE! | 2.75 | #VALUE! |
| T11HS14   | T11 | B11 | 0.122 | 0.071  | kleiner LLOQ | #VALUE! | 2.75 | #VALUE! |
| T11HS14   | T11 | B12 | 0.114 | 0.063  | kleiner LLOQ | #VALUE! | 2.75 | #VALUE! |
| 0         | T11 | C01 | 0.000 | -0.051 | kleiner LLOQ | #VALUE! | 1    | #VALUE! |
| 0         | T11 | C02 | 0.000 | -0.051 | kleiner LLOQ | #VALUE! | 1    | #VALUE! |
| 0         | T11 | C03 | 0.000 | -0.051 | kleiner LLOQ | #VALUE! | 1    | #VALUE! |
| 0         | T11 | C04 | 0.000 | -0.051 | kleiner LLOQ | #VALUE! | 1    | #VALUE! |
| T11HS21   | T11 | C05 | 0.731 | 0.680  | 0.680        | 0.031   | 2.75 | 0.084   |
| T11HS21   | T11 | C06 | 0.737 | 0.686  | 0.686        | 0.031   | 2.75 | 0.085   |
| T11HS22   | T11 | C07 | 0.575 | 0.524  | 0.524        | 0.023   | 2.75 | 0.064   |
| T11HS22   | T11 | C08 | 0.570 | 0.519  | 0.519        | 0.023   | 2.75 | 0.063   |
| T11HS23   | T11 | C09 | 0.538 | 0.488  | 0.488        | 0.022   | 2.75 | 0.059   |
| T11HS23   | T11 | C10 | 0.531 | 0.480  | 0.480        | 0.021   | 2.75 | 0.058   |
| T11HS24   | T11 | C11 | 0.208 | 0.157  | kleiner LLOQ | #VALUE! | 2.75 | #VALUE! |
| T11HS24   | T11 | C12 | 0.207 | 0.156  | kleiner LLOQ | #VALUE! | 2.75 | #VALUE! |
| 0         | T11 | D01 | 0.000 | -0.051 | kleiner LLOQ | #VALUE! | 1    | #VALUE! |
| 0         | T11 | D02 | 0.000 | -0.051 | kleiner LLOQ | #VALUE! | 1    | #VALUE! |
| 0         | T11 | D03 | 0     | 0      | kleiner LLOQ | #VALUE! | 1    | #VALUE! |
| 0         | T11 | D04 | 0     | 0      | kleiner LLOQ | #VALUE! | 1    | #VALUE! |
| 0         | T11 | D05 | 0     | 0      | kleiner LLOQ | #VALUE! | 1    | #VALUE! |
| 0         | T11 | D06 | 0     | 0      | kleiner LLOQ | #VALUE! | 1    | #VALUE! |
| 0         | T11 | D07 | 0     | 0      | kleiner LLOQ | #VALUE! | 1    | #VALUE! |
| 0         | T11 | D08 | 0     | 0      | kleiner LLOQ | #VALUE! | 1    | #VALUE! |
| 0         | T11 | D09 | 0     | 0      | kleiner LLOQ | #VALUE! | 1    | #VALUE! |
| 0         | T11 | D10 | 0     | 0      | kleiner LLOQ | #VALUE! | 1    | #VALUE! |
| 0         | T11 | D11 | 0     | 0      | kleiner LLOQ | #VALUE! | 1    | #VALUE! |
| 0         | T11 | D12 | 0     | 0      | kleiner LLOQ | #VALUE! | 1    | #VALUE! |
| 0         | T11 | E01 | 0     | 0      | kleiner LLOQ | #VALUE! | 1    | #VALUE! |
| 0         | T11 | E02 | 0     | 0      | kleiner LLOQ | #VALUE! | 1    | #VALUE! |
| 0         | T11 | E03 | 0     | 0      | kleiner LLOQ | #VALUE! | 1    | #VALUE! |
| 0         | T11 | E04 | 0     | 0      | kleiner LLOQ | #VALUE! | 1    | #VALUE! |
| 0         | T11 | E05 | 0     | 0      | kleiner LLOQ | #VALUE! | 1    | #VALUE! |
| 0         | T11 | E06 | 0     | 0      | kleiner LLOQ | #VALUE! | 1    | #VALUE! |
| 0         | T11 | E07 | 0     | 0      | kleiner LLOQ | #VALUE! | 1    | #VALUE! |
| 0         | T11 | E08 | 0     | 0      | kleiner LLOQ | #VALUE! | 1    | #VALUE! |
| 0         | T11 | E09 | 0     | 0      | kleiner LLOQ | #VALUE! | 1    | #VALUE! |
| 0         | T11 | E10 | 0     | 0      | kleiner LLOQ | #VALUE! | 1    | #VALUE! |
| 0         | T11 | E11 | 0     | 0      | kleiner LLOQ | #VALUE! | 1    | #VALUE! |
| 0         | T11 | F01 | 0     | 0      | kleiner LLOQ | #VALUE! | 1    | #VALUE! |
| 0         | T11 | F02 | 0     | 0      | kleiner LLOQ | #VALUE! | 1    | #VALUE! |
| 0         | T11 | F03 | 0     | 0      | kleiner LLOQ | #VALUE! | 1    | #VALUE! |
| 0         | T11 | F04 | 0     | 0      | kleiner LLOQ | #VALUE! | 1    | #VALUE! |
| 0         | T11 | F05 | 0     | 0      | kleiner LLOQ | #VALUE! | 1    | #VALUE! |
| 0         | T11 | F06 | 0     | 0      | kleiner LLOQ | #VALUE! | 1    | #VALUE! |
| 0         | T11 | F07 | 0     | 0      | kleiner LLOQ | #VALUE! | 1    | #VALUE! |
| 0         | T11 | F08 | 0     | 0      | kleiner LLOQ | #VALUE! | 1    | #VALUE! |
| 0         | T11 | F09 | 0     | 0      | kleiner LLOQ | #VALUE! | 1    | #VALUE! |
| 0         | T11 | F10 | 0     | 0      | kleiner LLOQ | #VALUE! | 1    | #VALUE! |
| 0         | T11 | F11 | 0     | 0      | kleiner LLOQ | #VALUE! | 1    | #VALUE! |
| 0         | T11 | F12 | 0     | 0      | kleiner LLOQ | #VALUE! | 1    | #VALUE! |
| 0         | T11 | G01 | 0     | 0      | kleiner LLOQ | #VALUE! | 1    | #VALUE! |
| 0         | T11 | G02 | 0     | 0      | kleiner LLOQ | #VALUE! | 1    | #VALUE! |
| 0         | T11 | G03 | 0     | 0      | kleiner LLOQ | #VALUE! | 1    | #VALUE! |
| 0         | T11 | G04 | 0     | 0      | kleiner LLOQ | #VALUE! | 1    | #VALUE! |
| 0         | T11 | G05 | 0     | 0      | kleiner LLOQ | #VALUE! | 1    | #VALUE! |
| 0         | T11 | G06 | 0     | 0      | kleiner LLOQ | #VALUE! | 1    | #VALUE! |
| Blank PEG | T11 | G07 | 0     | 0      | kleiner LLOQ | #VALUE! | 2.75 | #VALUE! |

Plate: T11

|   |   |   |   |   |       |       |       |       |       |       |       |       |
|---|---|---|---|---|-------|-------|-------|-------|-------|-------|-------|-------|
|   | 1 | 2 | 3 | 4 | 5     | 6     | 7     | 8     | 9     | 10    | 11    | 12    |
| A |   |   |   |   | 0.502 | 0.545 | 0.613 | 0.593 | 0.579 | 0.537 | 0.385 | 0.388 |
| B |   |   |   |   | 0.206 | 0.205 | 0.187 | 0.189 | 0.187 | 0.177 | 0.122 | 0.114 |
| C |   |   |   |   | 0.731 | 0.737 | 0.575 | 0.570 | 0.538 | 0.531 | 0.208 | 0.207 |
| D |   |   |   |   |       |       |       |       |       |       |       |       |
| E |   |   |   |   |       |       |       |       |       |       |       |       |
| F |   |   |   |   |       |       |       |       |       |       |       |       |
| G |   |   |   |   |       |       | 0.052 | 0.052 | 0.052 | 0.056 | 0.052 | 0.052 |
| H |   |   |   |   |       |       | 0.050 | 0.050 | 0.050 | 0.050 | 0.050 | 0.049 |

Plattenbelegung

|   |   |   |   |   |         |         |              |              |              |              |              |              |
|---|---|---|---|---|---------|---------|--------------|--------------|--------------|--------------|--------------|--------------|
|   | 1 | 2 | 3 | 4 | 5       | 6       | 7            | 8            | 9            | 10           | 11           | 12           |
| A |   |   |   |   | T11HN1  | T11HN1  | T11HN2       | T11HN2       | T11HN3       | T11HN3       | T11HN4       | T11HN4       |
| B |   |   |   |   | T11HS11 | T11HS11 | T11HS12      | T11HS12      | T11HS13      | T11HS13      | T11HS14      | T11HS14      |
| C |   |   |   |   | T11HS21 | T11HS21 | T11HS22      | T11HS22      | T11HS23      | T11HS23      | T11HS24      | T11HS24      |
| D |   |   |   |   |         |         |              |              |              |              |              |              |
| E |   |   |   |   |         |         |              |              |              |              |              |              |
| F |   |   |   |   |         |         |              |              |              |              |              |              |
| G |   |   |   |   |         |         | Blank PEG    | Blank PEG    | Blank PEG    | Blank PEG    | Blank PEG    | Blank PEG    |
| H |   |   |   |   |         |         | Blank no PEG | Blank no PEG | Blank no PEG | Blank no PEG | Blank no PEG | Blank no PEG |

Comment:

Date Operator Date Control

|              |     |     |   |   |              |         |      |         |
|--------------|-----|-----|---|---|--------------|---------|------|---------|
| Blank PEG    | T11 | G08 | 0 | 0 | kleiner LLOQ | #VALUE! | 2.75 | #VALUE! |
| Blank PEG    | T11 | G09 | 0 | 0 | kleiner LLOQ | #VALUE! | 2.75 | #VALUE! |
| Blank PEG    | T11 | G10 | 0 | 0 | kleiner LLOQ | #VALUE! | 2.75 | #VALUE! |
| Blank PEG    | T11 | G11 | 0 | 0 | kleiner LLOQ | #VALUE! | 2.75 | #VALUE! |
| Blank PEG    | T11 | G12 | 0 | 0 | kleiner LLOQ | #VALUE! | 2.75 | #VALUE! |
| 0            | T11 | H01 | 0 | 0 | kleiner LLOQ | #VALUE! | 1    | #VALUE! |
| 0            | T11 | H02 | 0 | 0 | kleiner LLOQ | #VALUE! | 1    | #VALUE! |
| 0            | T11 | H03 | 0 | 0 | kleiner LLOQ | #VALUE! | 1    | #VALUE! |
| 0            | T11 | H04 | 0 | 0 | kleiner LLOQ | #VALUE! | 1    | #VALUE! |
| 0            | T11 | H05 | 0 | 0 | kleiner LLOQ | #VALUE! | 1    | #VALUE! |
| 0            | T11 | H06 | 0 | 0 | kleiner LLOQ | #VALUE! | 1    | #VALUE! |
| Blank no PEG | T11 | H07 | 0 | 0 | kleiner LLOQ | #VALUE! | 2.75 | #VALUE! |
| Blank no PEG | T11 | H08 | 0 | 0 | kleiner LLOQ | #VALUE! | 2.75 | #VALUE! |
| Blank no PEG | T11 | H09 | 0 | 0 | kleiner LLOQ | #VALUE! | 2.75 | #VALUE! |
| Blank no PEG | T11 | H10 | 0 | 0 | kleiner LLOQ | #VALUE! | 2.75 | #VALUE! |
| Blank no PEG | T11 | H11 | 0 | 0 | kleiner LLOQ | #VALUE! | 2.75 | #VALUE! |
| Blank no PEG | T11 | H12 | 0 | 0 | kleiner LLOQ | #VALUE! | 2.75 | #VALUE! |

|                    |              |                            |                         |                         |                              |
|--------------------|--------------|----------------------------|-------------------------|-------------------------|------------------------------|
| Project number     | F-120        | Apparatus                  | Wallac Victor           | Operator                | IsBa                         |
| GLP Study (Number) | n.a.         | Protocol (Instrument meth) | LDH test 2016           | Date of preparation     | 19-04-18                     |
| hot substance      | isotope      | n.a.                       | File name (results)     | IsBa_180419/20_LDH_full | Date of measurement          |
|                    | name         | n.a.                       | Kind of well plate      | 96 well                 | shaking time [min]           |
| cold substance     | ACB-ID       | n.a.                       | sample volume [µL]      | 100                     | stirring rate (Target) [rpm] |
|                    | Batch number | n.a.                       | Cocktail volume [µL]    | 175                     | Kind of measurement          |
| n.a.               | name         | LDH                        | ACB-ID of cocktail      |                         | Wave length [nm]             |
|                    | ACB-ID       | L23982R                    | Matrix                  | DMEM (from powder)+PE   | Remarks                      |
| n.a.               | Batch number | SLBK6345V                  | Blank description       | DMEM/PEG, H2O           | Remarks                      |
|                    |              |                            | Pipettes (No. / volume) | 50-200µl                | Remarks                      |
| n.a.               | n.a.         | Pipettes (No. / volume)    | n.a.                    | Remarks                 | n.a.                         |

Messdaten (diese Tabelle in Bericht übernehmen)

| Sample name * | concentration (theor.) * | measured data | measured data | measured data | mean measured | SD   | RSD  | Blank * | measured data after * | concentration (calc.) * | Deviation * | Residuen |
|---------------|--------------------------|---------------|---------------|---------------|---------------|------|------|---------|-----------------------|-------------------------|-------------|----------|
|               | [µg/mL]                  | [AU]          | [AU]          | [AU]          | [AU]          | [AU] | [%]  | [AU]    | Blank subtraction     | [µg/mL]                 | [%]         |          |
| KLP1          | 0.148                    | 1.579         | 1.652         | 1.627         | 1.62          | 0.03 | 1.87 | 0.047   | 1.568                 | 0.148                   | -0.24       | 0.00     |
| KLP2          | 0.114                    | 1.357         | 1.443         | 1.372         | 1.39          | 0.04 | 2.70 | 0.054   | 1.340                 | 0.110                   | -3.40       | 0.00     |
| KLP3          | 0.074                    | 1.272         | 1.193         | 1.228         | 1.23          | 0.03 | 2.63 | 0.051   | 1.180                 | 0.084                   | 13.04       | 0.01     |
| KLP4          | 0.041                    | 0.959         | 0.972         | 0.883         | 0.94          | 0.04 | 4.19 | 0.051   | 0.887                 | 0.035                   | -13.32      | -0.01    |
| KLP5          |                          |               |               |               |               |      |      | 0.052   |                       |                         |             |          |
| KLP6          |                          |               |               |               |               |      |      | 0.051   |                       |                         |             |          |
| KLP7          |                          |               |               |               |               |      |      |         |                       |                         |             |          |
| KLP8          |                          |               |               |               |               |      |      |         |                       |                         |             |          |

Statistical data

|                                              |                                          |                     |             |
|----------------------------------------------|------------------------------------------|---------------------|-------------|
| Geradensteigung                              | Slope                                    | m                   | 6.05        |
| Y-Achsenabschnitt                            | Y-intercept                              | b                   | 0.67        |
| Standardabw. Geradensteigung                 | SD-Slope                                 | S <sub>m</sub>      | 0.620291227 |
| Standardabw. Achsenabschnittes               | SD-Y-Intercept                           | S <sub>b</sub>      | 0.063894294 |
| Anzahl Messpunkte                            | number of measuring points               | n                   | 4           |
| Quadratsumme                                 | sum of squares                           | Q <sub>xx</sub>     | 0.006578604 |
| Bereichsmittle                               |                                          | f                   | 0.094336926 |
| Freiheitsgrade                               | degree of freedom                        | f                   | 2           |
| Student-t-Faktor für (P = 95 %; f = n-2)     | Student-t-factor for (P = 95 %; f = n-2) | t                   | 4.303       |
| Vertrauensbereich Steig. (95 %) Obergrenze   |                                          | m + VB <sub>m</sub> | 8.722319627 |
| Vertrauensbereich Steig. (95 %) Untergrenze  |                                          | m - VB <sub>m</sub> | 3.384093228 |
| Vertrauensbereich Achsenabschnitt (95 %) Og. |                                          | b + VB <sub>b</sub> | 0.946914615 |
| Vertrauensbereich Achsenabschnitt (95 %) Ug. |                                          | b - VB <sub>b</sub> | 0.398761518 |
| Korrelationskoeffizient                      | correlation coefficient                  | r                   | 0.9897      |
| Bestimmtheitsmaß                             | determination coefficient                | r <sup>2</sup>      | 0.9794      |
| Reststandardabweichung                       |                                          | S <sub>0</sub>      | 0.050310948 |
| Summe Restquadrat                            |                                          | sd                  | 2.895683345 |
| Verfahrensstandardabw.                       |                                          | S <sub>0p</sub>     | 0.008311454 |
| Rel. Verfahrensstandardabw. %                |                                          | V <sub>0p</sub>     | 8.810393374 |

|                          |       |
|--------------------------|-------|
| mean Blank               | 0     |
| SD Blank                 | 0.00  |
| RSD Blank                | 3.79  |
| x <sup>2</sup> SD (LLOQ) | 0     |
| x <sup>2</sup> SD (LOD)  | 0     |
| LLOQ (AU)                | 0     |
| LOD (AU)                 | 0     |
| LLOQ                     | 1.568 |
| LLOQ (Lin)               | 0.887 |

Evaluation / Comment

LDH linearity valid with 7 standards, split in lin high and lin low, each with 4 standards and KLP4 common standard for both. R<sup>2</sup> 0,9981, deviations for both between -13.34% and +13.04%

Date

Operator

Date

Control

|               |  |         |               |
|---------------|--|---------|---------------|
| Formblatt-Nr. |  | Version |               |
| Titel         |  |         |               |
| Gültig ab     |  | Ablage  | Projektordner |

Figure 1 Linearity



Figure 2 Method validation Residuen Plot



Evaluation / Comment

lin passed

Date \_\_\_\_\_ Operator \_\_\_\_\_ Date \_\_\_\_\_ Control \_\_\_\_\_

| Sample name | Plate | Position | [AU]  | [AU]-Blank | Rating       | [µg/mL] | Dilution factor | [µg/mL] |
|-------------|-------|----------|-------|------------|--------------|---------|-----------------|---------|
| 0           | T8    | A01      | 0     | 0          | kleiner LLOQ | #VALUE! | 1               | #VALUE! |
| 0           | T8    | A02      | 0     | 0          | kleiner LLOQ | #VALUE! | 1               | #VALUE! |
| 0           | T8    | A03      | 0     | 0          | kleiner LLOQ | #VALUE! | 1               | #VALUE! |
| 0           | T8    | A04      | 0     | 0          | kleiner LLOQ | #VALUE! | 1               | #VALUE! |
| T8HN1       | T8    | A05      | 0.000 | -0.051     | kleiner LLOQ | #VALUE! |                 | #VALUE! |
| T8HN1       | T8    | A06      | 0.000 | -0.051     | kleiner LLOQ | #VALUE! |                 | #VALUE! |
| T8HN2       | T8    | A07      | 0     | 0          | kleiner LLOQ | #VALUE! |                 | #VALUE! |
| T8HN2       | T8    | A08      | 0     | 0          | kleiner LLOQ | #VALUE! |                 | #VALUE! |
| T8HN3       | T8    | A09      | 0.000 | -0.051     | kleiner LLOQ | #VALUE! |                 | #VALUE! |
| T8HN3       | T8    | A10      | 0.000 | -0.051     | kleiner LLOQ | #VALUE! |                 | #VALUE! |
| T8HN4       | T8    | A11      | 0     | 0          | kleiner LLOQ | #VALUE! |                 | #VALUE! |
| T8HN4       | T8    | A12      | 0     | 0          | kleiner LLOQ | #VALUE! |                 | #VALUE! |
| 0           | T8    | B01      | 0     | 0          | kleiner LLOQ | #VALUE! |                 | #VALUE! |
| 0           | T8    | B02      | 0     | 0          | kleiner LLOQ | #VALUE! |                 | #VALUE! |
| 0           | T8    | B03      | 0     | 0          | kleiner LLOQ | #VALUE! |                 | #VALUE! |
| 0           | T8    | B04      | 0     | 0          | kleiner LLOQ | #VALUE! |                 | #VALUE! |
| T8HS11      | T8    | B05      | 0     | 0          | kleiner LLOQ | #VALUE! |                 | #VALUE! |
| T8HS11      | T8    | B06      | 0.000 | -0.051     | kleiner LLOQ | #VALUE! |                 | #VALUE! |
| T8HS12      | T8    | B07      | 0.000 | -0.051     | kleiner LLOQ | #VALUE! |                 | #VALUE! |
| T8HS12      | T8    | B08      | 0.000 | -0.051     | kleiner LLOQ | #VALUE! |                 | #VALUE! |
| T8HS13      | T8    | B09      | 0     | 0          | kleiner LLOQ | #VALUE! |                 | #VALUE! |
| T8HS13      | T8    | B10      | 0     | 0          | kleiner LLOQ | #VALUE! |                 | #VALUE! |
| T8HS14      | T8    | B11      | 0     | 0          | kleiner LLOQ | #VALUE! |                 | #VALUE! |
| T8HS14      | T8    | B12      | 0     | 0          | kleiner LLOQ | #VALUE! |                 | #VALUE! |
| 0           | T8    | C01      | 0     | 0          | kleiner LLOQ | #VALUE! |                 | #VALUE! |
| 0           | T8    | C02      | 0     | 0          | kleiner LLOQ | #VALUE! |                 | #VALUE! |
| 0           | T8    | C03      | 0     | 0          | kleiner LLOQ | #VALUE! |                 | #VALUE! |
| 0           | T8    | C04      | 0     | 0          | kleiner LLOQ | #VALUE! |                 | #VALUE! |
| T8HS21      | T8    | C05      | 0.000 | -0.051     | kleiner LLOQ | #VALUE! |                 | #VALUE! |
| T8HS21      | T8    | C06      | 0.000 | -0.051     | kleiner LLOQ | #VALUE! |                 | #VALUE! |
| T8HS22      | T8    | C07      | 0.000 | -0.051     | kleiner LLOQ | #VALUE! |                 | #VALUE! |
| T8HS22      | T8    | C08      | 0.000 | -0.051     | kleiner LLOQ | #VALUE! |                 | #VALUE! |
| T8HS23      | T8    | C09      | 0.000 | -0.051     | kleiner LLOQ | #VALUE! |                 | #VALUE! |
| T8HS23      | T8    | C10      | 0.000 | -0.051     | kleiner LLOQ | #VALUE! |                 | #VALUE! |
| T8HS24      | T8    | C11      | 0     | 0          | kleiner LLOQ | #VALUE! | 1               | #VALUE! |
| T8HS24      | T8    | C12      | 0     | 0          | kleiner LLOQ | #VALUE! | 1               | #VALUE! |
| 0           | T8    | D01      | 0     | 0          | kleiner LLOQ | #VALUE! | 1               | #VALUE! |
| 0           | T8    | D02      | 0     | 0          | kleiner LLOQ | #VALUE! | 1               | #VALUE! |
| 0           | T8    | D03      | 0     | 0          | kleiner LLOQ | #VALUE! | 1               | #VALUE! |
| 0           | T8    | D04      | 0     | 0          | kleiner LLOQ | #VALUE! | 1               | #VALUE! |
| 0           | T8    | D05      | 0     | 0          | kleiner LLOQ | #VALUE! | 1               | #VALUE! |
| 0           | T8    | D06      | 0     | 0          | kleiner LLOQ | #VALUE! | 1               | #VALUE! |
| 0           | T8    | D07      | 0     | 0          | kleiner LLOQ | #VALUE! | 1               | #VALUE! |
| 0           | T8    | D08      | 0     | 0          | kleiner LLOQ | #VALUE! | 1               | #VALUE! |
| 0           | T8    | D09      | 0     | 0          | kleiner LLOQ | #VALUE! | 1               | #VALUE! |
| 0           | T8    | D10      | 0     | 0          | kleiner LLOQ | #VALUE! | 1               | #VALUE! |
| 0           | T8    | D11      | 0     | 0          | kleiner LLOQ | #VALUE! | 1               | #VALUE! |
| 0           | T8    | D12      | 0     | 0          | kleiner LLOQ | #VALUE! | 1               | #VALUE! |

  

|           |   |   |   |   |   |   |   |       |       |       |       |       |
|-----------|---|---|---|---|---|---|---|-------|-------|-------|-------|-------|
| Plate: T8 |   |   |   |   |   |   |   |       |       |       |       |       |
|           | 1 | 2 | 3 | 4 | 5 | 6 | 7 | 8     | 9     | 10    | 11    | 12    |
| A         |   |   |   |   |   |   |   |       |       |       |       |       |
| B         |   |   |   |   |   |   |   |       |       |       |       |       |
| C         |   |   |   |   |   |   |   |       |       |       |       |       |
| D         |   |   |   |   |   |   |   |       |       |       |       |       |
| E         |   |   |   |   |   |   |   |       |       |       |       |       |
| F         |   |   |   |   |   |   |   |       |       |       |       |       |
| G         |   |   |   |   |   |   |   | 0.053 | 0.055 | 0.053 | 0.054 | 0.053 |
| H         |   |   |   |   |   |   |   | 0.053 | 0.052 | 0.051 | 0.052 | 0.052 |

  

|                 |   |   |   |   |        |        |        |              |              |              |              |              |
|-----------------|---|---|---|---|--------|--------|--------|--------------|--------------|--------------|--------------|--------------|
| Plattenbelegung |   |   |   |   |        |        |        |              |              |              |              |              |
|                 | 1 | 2 | 3 | 4 | 5      | 6      | 7      | 8            | 9            | 10           | 11           | 12           |
| A               |   |   |   |   | T8HN1  | T8HN1  | T8HN2  | T8HN2        | T8HN3        | T8HN3        | T8HN4        | T8HN4        |
| B               |   |   |   |   | T8HS11 | T8HS11 | T8HS12 | T8HS12       | T8HS13       | T8HS13       | T8HS14       | T8HS14       |
| C               |   |   |   |   | T8HS21 | T8HS21 | T8HS22 | T8HS22       | T8HS23       | T8HS23       | T8HS24       | T8HS24       |
| D               |   |   |   |   |        |        |        |              |              |              |              |              |
| E               |   |   |   |   |        |        |        |              |              |              |              |              |
| F               |   |   |   |   |        |        |        |              |              |              |              |              |
| G               |   |   |   |   |        |        |        | Blank PEG    | Blank PEG    | Blank PEG    | Blank PEG    | Blank PEG    |
| H               |   |   |   |   |        |        |        | Blank no PEG | Blank no PEG | Blank no PEG | Blank no PEG | Blank no PEG |

  

Comment:  
alle Messwerte bei lin low.

Samples aufgeteilt in lin high und low/niedriger konzentrierte Samples bei lin low zu finden.

Date \_\_\_\_\_ Operator \_\_\_\_\_ Date \_\_\_\_\_ Control \_\_\_\_\_

|              |    |     |       |       |              |         |      |         |
|--------------|----|-----|-------|-------|--------------|---------|------|---------|
| 0            | T8 | E01 | 0     | 0     | kleiner LLOQ | #VALUE! | 1    | #VALUE! |
| 0            | T8 | E02 | 0     | 0     | kleiner LLOQ | #VALUE! | 1    | #VALUE! |
| 0            | T8 | E03 | 0     | 0     | kleiner LLOQ | #VALUE! | 1    | #VALUE! |
| 0            | T8 | E04 | 0     | 0     | kleiner LLOQ | #VALUE! | 1    | #VALUE! |
| 0            | T8 | E05 | 0     | 0     | kleiner LLOQ | #VALUE! | 1    | #VALUE! |
| 0            | T8 | E06 | 0     | 0     | kleiner LLOQ | #VALUE! | 1    | #VALUE! |
| 0            | T8 | E07 | 0     | 0     | kleiner LLOQ | #VALUE! | 1    | #VALUE! |
| 0            | T8 | E08 | 0     | 0     | kleiner LLOQ | #VALUE! | 1    | #VALUE! |
| 0            | T8 | E09 | 0     | 0     | kleiner LLOQ | #VALUE! | 1    | #VALUE! |
| 0            | T8 | E10 | 0     | 0     | kleiner LLOQ | #VALUE! | 1    | #VALUE! |
| 0            | T8 | E11 | 0     | 0     | kleiner LLOQ | #VALUE! | 1    | #VALUE! |
| 0            | T8 | E12 | 0     | 0     | kleiner LLOQ | #VALUE! | 1    | #VALUE! |
| 0            | T8 | F01 | 0     | 0     | kleiner LLOQ | #VALUE! | 1    | #VALUE! |
| 0            | T8 | F02 | 0     | 0     | kleiner LLOQ | #VALUE! | 1    | #VALUE! |
| 0            | T8 | F03 | 0     | 0     | kleiner LLOQ | #VALUE! | 1    | #VALUE! |
| 0            | T8 | F04 | 0     | 0     | kleiner LLOQ | #VALUE! | 1    | #VALUE! |
| 0            | T8 | F05 | 0     | 0     | kleiner LLOQ | #VALUE! | 1    | #VALUE! |
| 0            | T8 | F06 | 0     | 0     | kleiner LLOQ | #VALUE! | 1    | #VALUE! |
| 0            | T8 | F07 | 0     | 0     | kleiner LLOQ | #VALUE! | 1    | #VALUE! |
| 0            | T8 | F08 | 0     | 0     | kleiner LLOQ | #VALUE! | 1    | #VALUE! |
| 0            | T8 | F09 | 0     | 0     | kleiner LLOQ | #VALUE! | 1    | #VALUE! |
| 0            | T8 | F10 | 0     | 0     | kleiner LLOQ | #VALUE! | 1    | #VALUE! |
| 0            | T8 | F11 | 0     | 0     | kleiner LLOQ | #VALUE! | 1    | #VALUE! |
| 0            | T8 | F12 | 0     | 0     | kleiner LLOQ | #VALUE! | 1    | #VALUE! |
| 0            | T8 | G01 | 0     | 0     | kleiner LLOQ | #VALUE! | 1    | #VALUE! |
| 0            | T8 | G02 | 0     | 0     | kleiner LLOQ | #VALUE! | 1    | #VALUE! |
| 0            | T8 | G03 | 0     | 0     | kleiner LLOQ | #VALUE! | 1    | #VALUE! |
| 0            | T8 | G04 | 0     | 0     | kleiner LLOQ | #VALUE! | 1    | #VALUE! |
| 0            | T8 | G05 | 0     | 0     | kleiner LLOQ | #VALUE! | 1    | #VALUE! |
| 0            | T8 | G06 | 0     | 0     | kleiner LLOQ | #VALUE! | 1    | #VALUE! |
| Blank PEG    | T8 | G07 | 0.053 | 0.002 | kleiner LLOQ | #VALUE! | 2.75 | #VALUE! |
| Blank PEG    | T8 | G08 | 0.055 | 0.004 | kleiner LLOQ | #VALUE! | 2.75 | #VALUE! |
| Blank PEG    | T8 | G09 | 0.053 | 0.002 | kleiner LLOQ | #VALUE! | 2.75 | #VALUE! |
| Blank PEG    | T8 | G10 | 0.054 | 0.003 | kleiner LLOQ | #VALUE! | 2.75 | #VALUE! |
| Blank PEG    | T8 | G11 | 0.053 | 0.002 | kleiner LLOQ | #VALUE! | 2.75 | #VALUE! |
| Blank PEG    | T8 | G12 | 0.053 | 0.002 | kleiner LLOQ | #VALUE! | 2.75 | #VALUE! |
| 0            | T8 | H01 | 0     | 0     | kleiner LLOQ | #VALUE! | 1    | #VALUE! |
| 0            | T8 | H02 | 0     | 0     | kleiner LLOQ | #VALUE! | 1    | #VALUE! |
| 0            | T8 | H03 | 0     | 0     | kleiner LLOQ | #VALUE! | 1    | #VALUE! |
| 0            | T8 | H04 | 0     | 0     | kleiner LLOQ | #VALUE! | 1    | #VALUE! |
| 0            | T8 | H05 | 0     | 0     | kleiner LLOQ | #VALUE! | 1    | #VALUE! |
| 0            | T8 | H06 | 0     | 0     | kleiner LLOQ | #VALUE! | 1    | #VALUE! |
| Blank no PEG | T8 | H07 | 0.053 | 0.002 | kleiner LLOQ | #VALUE! | 2.75 | #VALUE! |
| Blank no PEG | T8 | H08 | 0.052 | 0.001 | kleiner LLOQ | #VALUE! | 2.75 | #VALUE! |
| Blank no PEG | T8 | H09 | 0.051 | 0.000 | kleiner LLOQ | #VALUE! | 2.75 | #VALUE! |
| Blank no PEG | T8 | H10 | 0.052 | 0.001 | kleiner LLOQ | #VALUE! | 2.75 | #VALUE! |
| Blank no PEG | T8 | H11 | 0.052 | 0.001 | kleiner LLOQ | #VALUE! | 2.75 | #VALUE! |
| Blank no PEG | T8 | H12 | 0.052 | 0.001 | kleiner LLOQ | #VALUE! | 2.75 | #VALUE! |



|        |    |     |   |              |         |   |         |
|--------|----|-----|---|--------------|---------|---|---------|
| 0      | T9 | A01 | 0 | kleiner LLOQ | #VALUE! | 1 | #VALUE! |
| 0      | T9 | A02 | 0 | kleiner LLOQ | #VALUE! | 1 | #VALUE! |
| 0      | T9 | A03 | 0 | kleiner LLOQ | #VALUE! | 1 | #VALUE! |
| 0      | T9 | A04 | 0 | kleiner LLOQ | #VALUE! | 1 | #VALUE! |
| T9HN1  | T9 | A05 | 0 | kleiner LLOQ | #VALUE! | 1 | #VALUE! |
| T9HN1  | T9 | A06 | 0 | kleiner LLOQ | #VALUE! | 1 | #VALUE! |
| T9HN2  | T9 | A07 | 0 | kleiner LLOQ | #VALUE! | 1 | #VALUE! |
| T9HN2  | T9 | A08 | 0 | kleiner LLOQ | #VALUE! | 1 | #VALUE! |
| T9HN3  | T9 | A09 | 0 | kleiner LLOQ | #VALUE! | 1 | #VALUE! |
| T9HN3  | T9 | A10 | 0 | kleiner LLOQ | #VALUE! | 1 | #VALUE! |
| T9HN4  | T9 | A11 | 0 | kleiner LLOQ | #VALUE! | 1 | #VALUE! |
| T9HN4  | T9 | A12 | 0 | kleiner LLOQ | #VALUE! | 1 | #VALUE! |
| 0      | T9 | B01 | 0 | kleiner LLOQ | #VALUE! | 1 | #VALUE! |
| 0      | T9 | B02 | 0 | kleiner LLOQ | #VALUE! | 1 | #VALUE! |
| 0      | T9 | B03 | 0 | kleiner LLOQ | #VALUE! | 1 | #VALUE! |
| 0      | T9 | B04 | 0 | kleiner LLOQ | #VALUE! | 1 | #VALUE! |
| T9HS11 | T9 | B05 | 0 | kleiner LLOQ | #VALUE! | 1 | #VALUE! |
| T9HS11 | T9 | B06 | 0 | kleiner LLOQ | #VALUE! | 1 | #VALUE! |
| T9HS12 | T9 | B07 | 0 | kleiner LLOQ | #VALUE! | 1 | #VALUE! |
| T9HS12 | T9 | B08 | 0 | kleiner LLOQ | #VALUE! | 1 | #VALUE! |
| T9HS13 | T9 | B09 | 0 | kleiner LLOQ | #VALUE! | 1 | #VALUE! |
| T9HS13 | T9 | B10 | 0 | kleiner LLOQ | #VALUE! | 1 | #VALUE! |
| T9HS14 | T9 | B11 | 0 | kleiner LLOQ | #VALUE! | 1 | #VALUE! |
| T9HS14 | T9 | B12 | 0 | kleiner LLOQ | #VALUE! | 1 | #VALUE! |
| 0      | T9 | C01 | 0 | kleiner LLOQ | #VALUE! | 1 | #VALUE! |
| 0      | T9 | C02 | 0 | kleiner LLOQ | #VALUE! | 1 | #VALUE! |
| 0      | T9 | C03 | 0 | kleiner LLOQ | #VALUE! | 1 | #VALUE! |
| 0      | T9 | C04 | 0 | kleiner LLOQ | #VALUE! | 1 | #VALUE! |
| T9HS21 | T9 | C05 | 0 | kleiner LLOQ | #VALUE! | 1 | #VALUE! |
| T9HS21 | T9 | C06 | 0 | kleiner LLOQ | #VALUE! | 1 | #VALUE! |
| T9HS22 | T9 | C07 | 0 | kleiner LLOQ | #VALUE! | 1 | #VALUE! |
| T9HS22 | T9 | C08 | 0 | kleiner LLOQ | #VALUE! | 1 | #VALUE! |
| T9HS23 | T9 | C09 | 0 | kleiner LLOQ | #VALUE! | 1 | #VALUE! |
| T9HS23 | T9 | C10 | 0 | kleiner LLOQ | #VALUE! | 1 | #VALUE! |
| T9HS24 | T9 | C11 | 0 | kleiner LLOQ | #VALUE! | 1 | #VALUE! |
| T9HS24 | T9 | C12 | 0 | kleiner LLOQ | #VALUE! | 1 | #VALUE! |
| 0      | T9 | D01 | 0 | kleiner LLOQ | #VALUE! | 1 | #VALUE! |
| 0      | T9 | D02 | 0 | kleiner LLOQ | #VALUE! | 1 | #VALUE! |
| 0      | T9 | D03 | 0 | kleiner LLOQ | #VALUE! | 1 | #VALUE! |
| 0      | T9 | D04 | 0 | kleiner LLOQ | #VALUE! | 1 | #VALUE! |
| 0      | T9 | D05 | 0 | kleiner LLOQ | #VALUE! | 1 | #VALUE! |
| 0      | T9 | D06 | 0 | kleiner LLOQ | #VALUE! | 1 | #VALUE! |
| 0      | T9 | D07 | 0 | kleiner LLOQ | #VALUE! | 1 | #VALUE! |
| 0      | T9 | D08 | 0 | kleiner LLOQ | #VALUE! | 1 | #VALUE! |
| 0      | T9 | D09 | 0 | kleiner LLOQ | #VALUE! | 1 | #VALUE! |
| 0      | T9 | D10 | 0 | kleiner LLOQ | #VALUE! | 1 | #VALUE! |
| 0      | T9 | D11 | 0 | kleiner LLOQ | #VALUE! | 1 | #VALUE! |
| 0      | T9 | D12 | 0 | kleiner LLOQ | #VALUE! | 1 | #VALUE! |

Plate: T9

|   | 1 | 2 | 3 | 4 | 5 | 6 | 7 | 8      | 9      | 10     | 11     | 12     |        |
|---|---|---|---|---|---|---|---|--------|--------|--------|--------|--------|--------|
| A |   |   |   |   |   |   |   |        |        |        |        |        |        |
| B |   |   |   |   |   |   |   |        |        |        |        |        |        |
| C |   |   |   |   |   |   |   |        |        |        |        |        |        |
| D |   |   |   |   |   |   |   |        |        |        |        |        |        |
| E |   |   |   |   |   |   |   |        |        |        |        |        |        |
| F |   |   |   |   |   |   |   |        |        |        |        |        |        |
| G |   |   |   |   |   |   |   | 0.0509 | 0.0505 | 0.0511 | 0.0506 | 0.0508 | 0.0498 |
| H |   |   |   |   |   |   |   | 0.0496 | 0.0490 | 0.0495 | 0.0494 | 0.0496 | 0.0497 |

Plattenbelegung

|   | 1 | 2 | 3 | 4 | 5      | 6      | 7      | 8            | 9            | 10           | 11           | 12           |
|---|---|---|---|---|--------|--------|--------|--------------|--------------|--------------|--------------|--------------|
| A |   |   |   |   | T9HN1  | T9HN1  | T9HN2  | T9HN2        | T9HN3        | T9HN3        | T9HN4        | T9HN4        |
| B |   |   |   |   | T9HS11 | T9HS11 | T9HS12 | T9HS12       | T9HS13       | T9HS13       | T9HS14       | T9HS14       |
| C |   |   |   |   | T9HS21 | T9HS21 | T9HS22 | T9HS22       | T9HS23       | T9HS23       | T9HS24       | T9HS24       |
| D |   |   |   |   |        |        |        |              |              |              |              |              |
| E |   |   |   |   |        |        |        |              |              |              |              |              |
| F |   |   |   |   |        |        |        |              |              |              |              |              |
| G |   |   |   |   |        |        |        | Blank PEG    | Blank PEG    | Blank PEG    | Blank PEG    | Blank PEG    |
| H |   |   |   |   |        |        |        | Blank no PEG | Blank no PEG | Blank no PEG | Blank no PEG | Blank no PEG |

Comment:

alle Messwerte bei lin low.

Date Operator

Date Control

|              |     |     |   |   |              |         |   |         |
|--------------|-----|-----|---|---|--------------|---------|---|---------|
| 0            | T9  | E01 | 0 | 0 | kleiner LLOQ | #VALUE! | 1 | #VALUE! |
| 0            | T9  | E02 | 0 | 0 | kleiner LLOQ | #VALUE! | 1 | #VALUE! |
| 0            | T9  | E03 | 0 | 0 | kleiner LLOQ | #VALUE! | 1 | #VALUE! |
| 0            | T9  | E04 | 0 | 0 | kleiner LLOQ | #VALUE! | 1 | #VALUE! |
| 0            | T9  | E05 | 0 | 0 | kleiner LLOQ | #VALUE! | 1 | #VALUE! |
| 0            | T9  | E06 | 0 | 0 | kleiner LLOQ | #VALUE! | 1 | #VALUE! |
| 0            | T9  | E07 | 0 | 0 | kleiner LLOQ | #VALUE! | 1 | #VALUE! |
| 0            | T9  | E08 | 0 | 0 | kleiner LLOQ | #VALUE! | 1 | #VALUE! |
| 0            | T9  | E09 | 0 | 0 | kleiner LLOQ | #VALUE! | 1 | #VALUE! |
| 0            | T9  | E10 | 0 | 0 | kleiner LLOQ | #VALUE! | 1 | #VALUE! |
| 0            | T9  | E11 | 0 | 0 | kleiner LLOQ | #VALUE! | 1 | #VALUE! |
| 0            | T9  | E12 | 0 | 0 | kleiner LLOQ | #VALUE! | 1 | #VALUE! |
| 0            | T9  | F01 | 0 | 0 | kleiner LLOQ | #VALUE! | 1 | #VALUE! |
| 0            | T9  | F02 | 0 | 0 | kleiner LLOQ | #VALUE! | 1 | #VALUE! |
| 0            | T9  | F03 | 0 | 0 | kleiner LLOQ | #VALUE! | 1 | #VALUE! |
| 0            | T9  | F04 | 0 | 0 | kleiner LLOQ | #VALUE! | 1 | #VALUE! |
| 0            | T9  | F05 | 0 | 0 | kleiner LLOQ | #VALUE! | 1 | #VALUE! |
| 0            | T9  | F06 | 0 | 0 | kleiner LLOQ | #VALUE! | 1 | #VALUE! |
| 0            | T9  | F07 | 0 | 0 | kleiner LLOQ | #VALUE! | 1 | #VALUE! |
| 0            | T9  | F08 | 0 | 0 | kleiner LLOQ | #VALUE! | 1 | #VALUE! |
| 0            | T9  | F09 | 0 | 0 | kleiner LLOQ | #VALUE! | 1 | #VALUE! |
| 0            | T9  | F10 | 0 | 0 | kleiner LLOQ | #VALUE! | 1 | #VALUE! |
| 0            | T9  | F11 | 0 | 0 | kleiner LLOQ | #VALUE! | 1 | #VALUE! |
| 0            | T9  | F12 | 0 | 0 | kleiner LLOQ | #VALUE! | 1 | #VALUE! |
| 0            | T9  | G01 | 0 | 0 | kleiner LLOQ | #VALUE! | 1 | #VALUE! |
| 0            | T9  | G02 | 0 | 0 | kleiner LLOQ | #VALUE! | 1 | #VALUE! |
| 0            | T9  | G03 | 0 | 0 | kleiner LLOQ | #VALUE! | 1 | #VALUE! |
| 0            | T9  | G04 | 0 | 0 | kleiner LLOQ | #VALUE! | 1 | #VALUE! |
| 0            | T9  | G05 | 0 | 0 | kleiner LLOQ | #VALUE! | 1 | #VALUE! |
| 0            | T9  | G06 | 0 | 0 | kleiner LLOQ | #VALUE! | 1 | #VALUE! |
| Blank PEG    | T9  | G07 | 0 | 0 | kleiner LLOQ | #VALUE! | 1 | #VALUE! |
| Blank PEG    | T9  | G08 | 0 | 0 | kleiner LLOQ | #VALUE! | 1 | #VALUE! |
| Blank PEG    | T9  | G09 | 0 | 0 | kleiner LLOQ | #VALUE! | 1 | #VALUE! |
| Blank PEG    | T9  | G10 | 0 | 0 | kleiner LLOQ | #VALUE! | 1 | #VALUE! |
| Blank PEG    | T9  | G11 | 0 | 0 | kleiner LLOQ | #VALUE! | 1 | #VALUE! |
| Blank PEG    | T9  | G12 | 0 | 0 | kleiner LLOQ | #VALUE! | 1 | #VALUE! |
| 0            | T9  | H01 | 0 | 0 | kleiner LLOQ | #VALUE! | 1 | #VALUE! |
| 0            | T9  | H02 | 0 | 0 | kleiner LLOQ | #VALUE! | 1 | #VALUE! |
| 0            | T9  | H03 | 0 | 0 | kleiner LLOQ | #VALUE! | 1 | #VALUE! |
| 0            | T9  | H04 | 0 | 0 | kleiner LLOQ | #VALUE! | 1 | #VALUE! |
| 0            | T9  | H05 | 0 | 0 | kleiner LLOQ | #VALUE! | 1 | #VALUE! |
| 0            | T9  | H06 | 0 | 0 | kleiner LLOQ | #VALUE! | 1 | #VALUE! |
| Blank no PEG | T9  | H07 | 0 | 0 | kleiner LLOQ | #VALUE! | 1 | #VALUE! |
| Blank no PEG | T9  | H08 | 0 | 0 | kleiner LLOQ | #VALUE! | 1 | #VALUE! |
| Blank no PEG | T9  | H09 | 0 | 0 | kleiner LLOQ | #VALUE! | 1 | #VALUE! |
| Blank no PEG | T9  | H10 | 0 | 0 | kleiner LLOQ | #VALUE! | 1 | #VALUE! |
| Blank no PEG | T9  | H11 | 0 | 0 | kleiner LLOQ | #VALUE! | 1 | #VALUE! |
| Blank no PEG | T9  | H12 | 0 | 0 | kleiner LLOQ | #VALUE! | 1 | #VALUE! |
| 0            | T10 | A01 | 0 | 0 | kleiner LLOQ | #VALUE! | 1 | #VALUE! |
| 0            | T10 | A02 | 0 | 0 | kleiner LLOQ | #VALUE! | 1 | #VALUE! |
| 0            | T10 | A03 | 0 | 0 | kleiner LLOQ | #VALUE! | 1 | #VALUE! |
| 0            | T10 | A04 | 0 | 0 | kleiner LLOQ | #VALUE! | 1 | #VALUE! |
| T10HN1       | T10 | A05 | 0 | 0 | kleiner LLOQ | #VALUE! | 1 | #VALUE! |
| T10HN1       | T10 | A06 | 0 | 0 | kleiner LLOQ | #VALUE! | 1 | #VALUE! |
| T10HN2       | T10 | A07 | 0 | 0 | kleiner LLOQ | #VALUE! | 1 | #VALUE! |
| T10HN2       | T10 | A08 | 0 | 0 | kleiner LLOQ | #VALUE! | 1 | #VALUE! |
| T10HN3       | T10 | A09 | 0 | 0 | kleiner LLOQ | #VALUE! | 1 | #VALUE! |
| T10HN3       | T10 | A10 | 0 | 0 | kleiner LLOQ | #VALUE! | 1 | #VALUE! |
| T10HN4       | T10 | A11 | 0 | 0 | kleiner LLOQ | #VALUE! | 1 | #VALUE! |
| T10HN4       | T10 | A12 | 0 | 0 | kleiner LLOQ | #VALUE! | 1 | #VALUE! |
| 0            | T10 | B01 | 0 | 0 | kleiner LLOQ | #VALUE! | 1 | #VALUE! |
| 0            | T10 | B02 | 0 | 0 | kleiner LLOQ | #VALUE! | 1 | #VALUE! |
| 0            | T10 | B03 | 0 | 0 | kleiner LLOQ | #VALUE! | 1 | #VALUE! |
| 0            | T10 | B04 | 0 | 0 | kleiner LLOQ | #VALUE! | 1 | #VALUE! |
| T10HS11      | T10 | B05 | 0 | 0 | kleiner LLOQ | #VALUE! | 1 | #VALUE! |
| T10HS11      | T10 | B06 | 0 | 0 | kleiner LLOQ | #VALUE! | 1 | #VALUE! |
| T10HS12      | T10 | B07 | 0 | 0 | kleiner LLOQ | #VALUE! | 1 | #VALUE! |
| T10HS12      | T10 | B08 | 0 | 0 | kleiner LLOQ | #VALUE! | 1 | #VALUE! |
| T10HS13      | T10 | B09 | 0 | 0 | kleiner LLOQ | #VALUE! | 1 | #VALUE! |
| T10HS13      | T10 | B10 | 0 | 0 | kleiner LLOQ | #VALUE! | 1 | #VALUE! |
| T10HS14      | T10 | B11 | 0 | 0 | kleiner LLOQ | #VALUE! | 1 | #VALUE! |
| T10HS14      | T10 | B12 | 0 | 0 | kleiner LLOQ | #VALUE! | 1 | #VALUE! |
| 0            | T10 | C01 | 0 | 0 | kleiner LLOQ | #VALUE! | 1 | #VALUE! |

Plate: T10

|   | 1 | 2 | 3 | 4 | 5 | 6 | 7     | 8     | 9     | 10    | 11    | 12    |
|---|---|---|---|---|---|---|-------|-------|-------|-------|-------|-------|
| A |   |   |   |   |   |   |       |       |       |       |       |       |
| B |   |   |   |   |   |   |       |       |       |       |       |       |
| C |   |   |   |   |   |   |       |       |       |       |       |       |
| D |   |   |   |   |   |   |       |       |       |       |       |       |
| E |   |   |   |   |   |   |       |       |       |       |       |       |
| F |   |   |   |   |   |   |       |       |       |       |       |       |
| G |   |   |   |   |   |   | 0.051 | 0.051 | 0.051 | 0.053 | 0.051 | 0.054 |
| H |   |   |   |   |   |   | 0.050 | 0.050 | 0.052 | 0.051 | 0.050 | 0.050 |

Plattenbelegung

|   | 1 | 2 | 3 | 4 | 5       | 6       | 7       | 8       | 9       | 10      | 11      | 12      |
|---|---|---|---|---|---------|---------|---------|---------|---------|---------|---------|---------|
| A |   |   |   |   | T10HN1  | T10HN1  | T10HN2  | T10HN2  | T10HN3  | T10HN3  | T10HN4  | T10HN4  |
| B |   |   |   |   | T10HS11 | T10HS11 | T10HS12 | T10HS12 | T10HS13 | T10HS13 | T10HS14 | T10HS14 |
| C |   |   |   |   | T10HS21 | T10HS21 | T10HS22 | T10HS22 | T10HS23 | T10HS23 | T10HS24 | T10HS24 |
| D |   |   |   |   |         |         |         |         |         |         |         |         |
| E |   |   |   |   |         |         |         |         |         |         |         |         |



|         |     |     |   |   |              |         |   |         |
|---------|-----|-----|---|---|--------------|---------|---|---------|
| 0       | T11 | A01 | 0 | 0 | kleiner LLOQ | #VALUE! | 1 | #VALUE! |
| 0       | T11 | A02 | 0 | 0 | kleiner LLOQ | #VALUE! | 1 | #VALUE! |
| 0       | T11 | A03 | 0 | 0 | kleiner LLOQ | #VALUE! | 1 | #VALUE! |
| 0       | T11 | A04 | 0 | 0 | kleiner LLOQ | #VALUE! | 1 | #VALUE! |
| T11HN1  | T11 | A05 | 0 | 0 | kleiner LLOQ | #VALUE! | 1 | #VALUE! |
| T11HN1  | T11 | A06 | 0 | 0 | kleiner LLOQ | #VALUE! | 1 | #VALUE! |
| T11HN2  | T11 | A07 | 0 | 0 | kleiner LLOQ | #VALUE! | 1 | #VALUE! |
| T11HN2  | T11 | A08 | 0 | 0 | kleiner LLOQ | #VALUE! | 1 | #VALUE! |
| T11HN3  | T11 | A09 | 0 | 0 | kleiner LLOQ | #VALUE! | 1 | #VALUE! |
| T11HN3  | T11 | A10 | 0 | 0 | kleiner LLOQ | #VALUE! | 1 | #VALUE! |
| T11HN4  | T11 | A11 | 0 | 0 | kleiner LLOQ | #VALUE! | 1 | #VALUE! |
| T11HN4  | T11 | A12 | 0 | 0 | kleiner LLOQ | #VALUE! | 1 | #VALUE! |
| 0       | T11 | B01 | 0 | 0 | kleiner LLOQ | #VALUE! | 1 | #VALUE! |
| 0       | T11 | B02 | 0 | 0 | kleiner LLOQ | #VALUE! | 1 | #VALUE! |
| 0       | T11 | B03 | 0 | 0 | kleiner LLOQ | #VALUE! | 1 | #VALUE! |
| 0       | T11 | B04 | 0 | 0 | kleiner LLOQ | #VALUE! | 1 | #VALUE! |
| T11HS11 | T11 | B05 | 0 | 0 | kleiner LLOQ | #VALUE! | 1 | #VALUE! |
| T11HS11 | T11 | B06 | 0 | 0 | kleiner LLOQ | #VALUE! | 1 | #VALUE! |
| T11HS12 | T11 | B07 | 0 | 0 | kleiner LLOQ | #VALUE! | 1 | #VALUE! |
| T11HS12 | T11 | B08 | 0 | 0 | kleiner LLOQ | #VALUE! | 1 | #VALUE! |
| T11HS13 | T11 | B09 | 0 | 0 | kleiner LLOQ | #VALUE! | 1 | #VALUE! |
| T11HS13 | T11 | B10 | 0 | 0 | kleiner LLOQ | #VALUE! | 1 | #VALUE! |
| T11HS14 | T11 | B11 | 0 | 0 | kleiner LLOQ | #VALUE! | 1 | #VALUE! |
| T11HS14 | T11 | B12 | 0 | 0 | kleiner LLOQ | #VALUE! | 1 | #VALUE! |
| 0       | T11 | C01 | 0 | 0 | kleiner LLOQ | #VALUE! | 1 | #VALUE! |
| 0       | T11 | C02 | 0 | 0 | kleiner LLOQ | #VALUE! | 1 | #VALUE! |
| 0       | T11 | C03 | 0 | 0 | kleiner LLOQ | #VALUE! | 1 | #VALUE! |
| 0       | T11 | C04 | 0 | 0 | kleiner LLOQ | #VALUE! | 1 | #VALUE! |
| T11HS21 | T11 | C05 | 0 | 0 | kleiner LLOQ | #VALUE! | 1 | #VALUE! |
| T11HS21 | T11 | C06 | 0 | 0 | kleiner LLOQ | #VALUE! | 1 | #VALUE! |
| T11HS22 | T11 | C07 | 0 | 0 | kleiner LLOQ | #VALUE! | 1 | #VALUE! |
| T11HS22 | T11 | C08 | 0 | 0 | kleiner LLOQ | #VALUE! | 1 | #VALUE! |
| T11HS23 | T11 | C09 | 0 | 0 | kleiner LLOQ | #VALUE! | 1 | #VALUE! |
| T11HS23 | T11 | C10 | 0 | 0 | kleiner LLOQ | #VALUE! | 1 | #VALUE! |
| T11HS24 | T11 | C11 | 0 | 0 | kleiner LLOQ | #VALUE! | 1 | #VALUE! |
| T11HS24 | T11 | C12 | 0 | 0 | kleiner LLOQ | #VALUE! | 1 | #VALUE! |
| 0       | T11 | D01 | 0 | 0 | kleiner LLOQ | #VALUE! | 1 | #VALUE! |
| 0       | T11 | D02 | 0 | 0 | kleiner LLOQ | #VALUE! | 1 | #VALUE! |
| 0       | T11 | D03 | 0 | 0 | kleiner LLOQ | #VALUE! | 1 | #VALUE! |
| 0       | T11 | D04 | 0 | 0 | kleiner LLOQ | #VALUE! | 1 | #VALUE! |
| 0       | T11 | D05 | 0 | 0 | kleiner LLOQ | #VALUE! | 1 | #VALUE! |
| 0       | T11 | D06 | 0 | 0 | kleiner LLOQ | #VALUE! | 1 | #VALUE! |
| 0       | T11 | D07 | 0 | 0 | kleiner LLOQ | #VALUE! | 1 | #VALUE! |
| 0       | T11 | D08 | 0 | 0 | kleiner LLOQ | #VALUE! | 1 | #VALUE! |
| 0       | T11 | D09 | 0 | 0 | kleiner LLOQ | #VALUE! | 1 | #VALUE! |
| 0       | T11 | D10 | 0 | 0 | kleiner LLOQ | #VALUE! | 1 | #VALUE! |
| 0       | T11 | D11 | 0 | 0 | kleiner LLOQ | #VALUE! | 1 | #VALUE! |
| 0       | T11 | D12 | 0 | 0 | kleiner LLOQ | #VALUE! | 1 | #VALUE! |
| 0       | T11 | E01 | 0 | 0 | kleiner LLOQ | #VALUE! | 1 | #VALUE! |
| 0       | T11 | E02 | 0 | 0 | kleiner LLOQ | #VALUE! | 1 | #VALUE! |
| 0       | T11 | E03 | 0 | 0 | kleiner LLOQ | #VALUE! | 1 | #VALUE! |
| 0       | T11 | E04 | 0 | 0 | kleiner LLOQ | #VALUE! | 1 | #VALUE! |
| 0       | T11 | E05 | 0 | 0 | kleiner LLOQ | #VALUE! | 1 | #VALUE! |
| 0       | T11 | E06 | 0 | 0 | kleiner LLOQ | #VALUE! | 1 | #VALUE! |
| 0       | T11 | E07 | 0 | 0 | kleiner LLOQ | #VALUE! | 1 | #VALUE! |
| 0       | T11 | E08 | 0 | 0 | kleiner LLOQ | #VALUE! | 1 | #VALUE! |
| 0       | T11 | E09 | 0 | 0 | kleiner LLOQ | #VALUE! | 1 | #VALUE! |

Plate: T11

|   | 1 | 2 | 3 | 4 | 5 | 6 | 7 | 8     | 9     | 10    | 11    | 12    |       |
|---|---|---|---|---|---|---|---|-------|-------|-------|-------|-------|-------|
| A |   |   |   |   |   |   |   |       |       |       |       |       |       |
| B |   |   |   |   |   |   |   |       |       |       |       |       |       |
| C |   |   |   |   |   |   |   |       |       |       |       |       |       |
| D |   |   |   |   |   |   |   |       |       |       |       |       |       |
| E |   |   |   |   |   |   |   |       |       |       |       |       |       |
| F |   |   |   |   |   |   |   |       |       |       |       |       |       |
| G |   |   |   |   |   |   |   | 0.052 | 0.052 | 0.052 | 0.056 | 0.052 | 0.052 |
| H |   |   |   |   |   |   |   | 0.050 | 0.050 | 0.050 | 0.050 | 0.050 | 0.049 |

Plattenbelegung

|   | 1 | 2 | 3 | 4 | 5       | 6       | 7       | 8            | 9            | 10           | 11           | 12           |
|---|---|---|---|---|---------|---------|---------|--------------|--------------|--------------|--------------|--------------|
| A |   |   |   |   | T11HN1  | T11HN1  | T11HN2  | T11HN2       | T11HN3       | T11HN3       | T11HN4       | T11HN4       |
| B |   |   |   |   | T11HS11 | T11HS11 | T11HS12 | T11HS12      | T11HS13      | T11HS13      | T11HS14      | T11HS14      |
| C |   |   |   |   | T11HS21 | T11HS21 | T11HS22 | T11HS22      | T11HS23      | T11HS23      | T11HS24      | T11HS24      |
| D |   |   |   |   |         |         |         |              |              |              |              |              |
| E |   |   |   |   |         |         |         |              |              |              |              |              |
| F |   |   |   |   |         |         |         |              |              |              |              |              |
| G |   |   |   |   |         |         |         | Blank PEG    | Blank PEG    | Blank PEG    | Blank PEG    | Blank PEG    |
| H |   |   |   |   |         |         |         | Blank no PEG | Blank no PEG | Blank no PEG | Blank no PEG | Blank no PEG |

Comment:

alle Messwerte bei lin low.

Date Operator

Date Control

|              |     |     |   |   |              |         |   |         |
|--------------|-----|-----|---|---|--------------|---------|---|---------|
| 0            | T11 | E10 | 0 | 0 | kleiner LLOQ | #VALUE! | 1 | #VALUE! |
| 0            | T11 | E11 | 0 | 0 | kleiner LLOQ | #VALUE! | 1 | #VALUE! |
| 0            | T11 | E12 | 0 | 0 | kleiner LLOQ | #VALUE! | 1 | #VALUE! |
| 0            | T11 | F01 | 0 | 0 | kleiner LLOQ | #VALUE! | 1 | #VALUE! |
| 0            | T11 | F02 | 0 | 0 | kleiner LLOQ | #VALUE! | 1 | #VALUE! |
| 0            | T11 | F03 | 0 | 0 | kleiner LLOQ | #VALUE! | 1 | #VALUE! |
| 0            | T11 | F04 | 0 | 0 | kleiner LLOQ | #VALUE! | 1 | #VALUE! |
| 0            | T11 | F05 | 0 | 0 | kleiner LLOQ | #VALUE! | 1 | #VALUE! |
| 0            | T11 | F06 | 0 | 0 | kleiner LLOQ | #VALUE! | 1 | #VALUE! |
| 0            | T11 | F07 | 0 | 0 | kleiner LLOQ | #VALUE! | 1 | #VALUE! |
| 0            | T11 | F08 | 0 | 0 | kleiner LLOQ | #VALUE! | 1 | #VALUE! |
| 0            | T11 | F09 | 0 | 0 | kleiner LLOQ | #VALUE! | 1 | #VALUE! |
| 0            | T11 | F10 | 0 | 0 | kleiner LLOQ | #VALUE! | 1 | #VALUE! |
| 0            | T11 | F11 | 0 | 0 | kleiner LLOQ | #VALUE! | 1 | #VALUE! |
| 0            | T11 | F12 | 0 | 0 | kleiner LLOQ | #VALUE! | 1 | #VALUE! |
| 0            | T11 | G01 | 0 | 0 | kleiner LLOQ | #VALUE! | 1 | #VALUE! |
| 0            | T11 | G02 | 0 | 0 | kleiner LLOQ | #VALUE! | 1 | #VALUE! |
| 0            | T11 | G03 | 0 | 0 | kleiner LLOQ | #VALUE! | 1 | #VALUE! |
| 0            | T11 | G04 | 0 | 0 | kleiner LLOQ | #VALUE! | 1 | #VALUE! |
| 0            | T11 | G05 | 0 | 0 | kleiner LLOQ | #VALUE! | 1 | #VALUE! |
| 0            | T11 | G06 | 0 | 0 | kleiner LLOQ | #VALUE! | 1 | #VALUE! |
| Blank PEG    | T11 | G07 | 0 | 0 | kleiner LLOQ | #VALUE! | 1 | #VALUE! |
| Blank PEG    | T11 | G08 | 0 | 0 | kleiner LLOQ | #VALUE! | 1 | #VALUE! |
| Blank PEG    | T11 | G09 | 0 | 0 | kleiner LLOQ | #VALUE! | 1 | #VALUE! |
| Blank PEG    | T11 | G10 | 0 | 0 | kleiner LLOQ | #VALUE! | 1 | #VALUE! |
| Blank PEG    | T11 | G11 | 0 | 0 | kleiner LLOQ | #VALUE! | 1 | #VALUE! |
| Blank PEG    | T11 | G12 | 0 | 0 | kleiner LLOQ | #VALUE! | 1 | #VALUE! |
| 0            | T11 | H01 | 0 | 0 | kleiner LLOQ | #VALUE! | 1 | #VALUE! |
| 0            | T11 | H02 | 0 | 0 | kleiner LLOQ | #VALUE! | 1 | #VALUE! |
| 0            | T11 | H03 | 0 | 0 | kleiner LLOQ | #VALUE! | 1 | #VALUE! |
| 0            | T11 | H04 | 0 | 0 | kleiner LLOQ | #VALUE! | 1 | #VALUE! |
| 0            | T11 | H05 | 0 | 0 | kleiner LLOQ | #VALUE! | 1 | #VALUE! |
| 0            | T11 | H06 | 0 | 0 | kleiner LLOQ | #VALUE! | 1 | #VALUE! |
| Blank no PEG | T11 | H07 | 0 | 0 | kleiner LLOQ | #VALUE! | 1 | #VALUE! |
| Blank no PEG | T11 | H08 | 0 | 0 | kleiner LLOQ | #VALUE! | 1 | #VALUE! |
| Blank no PEG | T11 | H09 | 0 | 0 | kleiner LLOQ | #VALUE! | 1 | #VALUE! |
| Blank no PEG | T11 | H10 | 0 | 0 | kleiner LLOQ | #VALUE! | 1 | #VALUE! |
| Blank no PEG | T11 | H11 | 0 | 0 | kleiner LLOQ | #VALUE! | 1 | #VALUE! |
| Blank no PEG | T11 | H12 | 0 | 0 | kleiner LLOQ | #VALUE! | 1 | #VALUE! |

|       |       |       |       |       |       |       |       |       |       |       |       |
|-------|-------|-------|-------|-------|-------|-------|-------|-------|-------|-------|-------|
| 1.447 | 1.739 |       | 1.170 |       |       |       |       |       | 0.667 | 0.440 | 0.043 |
| 1.447 | 1.332 |       | 1.392 | 0.137 | 0.146 | 0.130 | 0.138 | 0.109 | 0.729 | 0.478 | 0.042 |
| 1.391 | 1.281 |       | 1.311 | 0.204 | 0.184 | 0.184 | 0.198 | 0.201 | 0.743 | 0.474 | 0.043 |
| 0.961 | 0.835 |       | 1.405 | 0.336 | 0.347 | 0.375 | 0.387 | 0.300 | 0.824 | 0.483 | 0.044 |
| 0.445 | 0.441 |       | 1.280 | 1.085 | 1.086 | 1.218 | 1.004 | 0.873 | 0.704 | 0.457 | 0.041 |
| 0.355 | 0.315 |       | 1.332 | 1.768 | 1.925 | 1.753 | 1.739 | 1.606 |       |       | 0.036 |
| 0.223 | 0.188 | 1.666 | 1.499 | 1.632 |       | 0.048 | 0.046 | 0.047 | 0.048 | 0.048 | 0.048 |
| 0.118 | 0.106 | 1.556 | 1.622 | 1.573 |       | 0.047 | 0.054 | 0.051 | 0.051 | 0.052 | 0.051 |

1

|       |       |       |       |       |       |       |       |       |       |       |       |
|-------|-------|-------|-------|-------|-------|-------|-------|-------|-------|-------|-------|
| 1.652 | 1.627 |       | 1.188 | 0.748 | 0.811 | 0.764 | 0.753 | 0.674 | 0.751 | 0.529 | 0.044 |
| 1.443 | 1.372 |       | 1.364 | 0.139 | 0.147 | 0.131 | 0.139 | 0.110 | 0.811 | 0.561 | 0.043 |
| 1.377 | 1.281 |       | 1.284 | 0.206 | 0.189 | 0.184 | 0.200 | 0.202 | 0.821 | 0.560 | 0.044 |
| 0.972 | 0.883 |       | 1.387 | 0.339 | 0.349 | 0.386 | 0.406 | 0.312 | 0.903 | 0.565 | 0.044 |
| 0.484 | 0.474 |       | 1.298 | 1.087 | 1.113 | 1.203 | 1.022 | 0.903 | 0.790 | 0.544 | 0.042 |
| 0.359 | 0.326 |       | 1.308 | 1.622 | 1.622 | 1.630 | 1.625 | 1.550 |       |       | 0.037 |
| 0.228 | 0.199 | 1.527 | 1.373 | 1.462 |       | 0.048 | 0.046 | 0.048 | 0.049 | 0.049 | 0.049 |
| 0.125 | 0.109 | 1.473 | 1.410 | 1.371 |       | 0.048 | 0.054 | 0.052 | 0.052 | 0.052 | 0.051 |

2

|       |       |       |       |       |       |       |       |       |       |       |       |
|-------|-------|-------|-------|-------|-------|-------|-------|-------|-------|-------|-------|
| 1.579 | 1.475 |       | 1.150 | 1.210 | 1.303 | 1.202 | 1.219 | 1.125 | 0.759 | 0.549 | 0.043 |
| 1.357 | 1.303 |       | 1.283 | 0.140 | 0.148 | 0.131 | 0.139 | 0.111 | 0.820 | 0.575 | 0.043 |
| 1.323 | 1.228 |       | 1.227 | 0.206 | 0.188 | 0.184 | 0.198 | 0.201 | 0.824 | 0.579 | 0.043 |
| 0.959 | 0.872 |       | 1.321 | 0.339 | 0.348 | 0.387 | 0.406 | 0.314 | 0.909 | 0.580 | 0.044 |
| 0.483 | 0.473 |       | 1.270 | 1.069 | 1.103 | 1.181 | 1.017 | 0.903 | 0.798 | 0.560 | 0.042 |
| 0.360 | 0.326 |       | 1.270 | 1.497 | 1.448 | 1.496 | 1.494 | 1.449 |       |       | 0.037 |
| 0.228 | 0.199 | 1.374 | 1.262 | 1.314 |       | 0.048 | 0.046 | 0.048 | 0.049 | 0.049 | 0.049 |
| 0.125 | 0.110 | 1.346 | 1.262 | 1.253 |       | 0.048 | 0.054 | 0.052 | 0.052 | 0.052 | 0.051 |

3

|       |       |  |  |       |       |       |       |       |       |       |       |
|-------|-------|--|--|-------|-------|-------|-------|-------|-------|-------|-------|
| 1.511 | 1.369 |  |  | 1.538 | 1.712 | 1.528 | 1.502 | 1.425 |       |       | 0.043 |
| 1.296 | 1.261 |  |  |       |       |       |       |       |       |       | 0.043 |
| 1.272 | 1.193 |  |  |       |       |       |       |       |       |       | 0.043 |
| 0.947 | 0.859 |  |  |       |       |       |       |       |       |       | 0.044 |
| 0.481 | 0.471 |  |  |       |       |       |       |       |       |       | 0.042 |
| 0.361 | 0.325 |  |  |       |       |       |       |       |       |       | 0.037 |
| 0.229 | 0.199 |  |  |       |       | 0.048 | 0.046 | 0.048 | 0.049 | 0.049 | 0.049 |
| 0.125 | 0.110 |  |  |       |       | 0.047 | 0.054 | 0.052 | 0.052 | 0.052 | 0.051 |

4

|       |       |       |       |       |       |       |       |       |       |       |       |
|-------|-------|-------|-------|-------|-------|-------|-------|-------|-------|-------|-------|
| 1.493 | 1.317 | 1.678 | 1.110 | 1.621 | 1.807 | 1.618 | 1.584 | 1.508 | 0.765 | 0.597 | 0.043 |
| 1.259 | 1.238 | 1.850 | 1.197 | 0.139 | 0.150 | 0.132 | 0.139 | 0.111 | 0.821 | 0.588 | 0.043 |
| 1.248 | 1.175 | 1.816 | 1.153 | 0.204 | 0.188 | 0.184 | 0.197 | 0.199 | 0.831 | 0.599 | 0.044 |
| 0.943 | 0.859 | 1.970 | 1.231 | 0.338 | 0.357 | 0.386 | 0.406 | 0.316 | 0.916 | 0.595 | 0.044 |
| 0.480 | 0.470 | 2.220 | 1.220 | 1.054 | 1.088 | 1.154 | 1.006 | 0.902 | 0.805 | 0.579 | 0.042 |
| 0.359 | 0.325 | 2.149 | 1.211 | 1.395 | 1.324 | 1.348 | 1.345 | 1.317 | 0.037 | 0.037 | 0.037 |
| 0.228 | 0.199 | 1.240 | 1.151 | 1.183 | 0.034 | 0.049 | 0.046 | 0.048 | 0.049 | 0.049 | 0.049 |
| 0.125 | 0.110 | 1.223 | 1.132 | 1.146 | 0.038 | 0.048 | 0.054 | 0.052 | 0.052 | 0.052 | 0.051 |

5

|       |       |  |       |       |       |       |       |       |       |       |       |
|-------|-------|--|-------|-------|-------|-------|-------|-------|-------|-------|-------|
| 1.434 | 1.258 |  | 1.090 | 1.648 | 1.876 | 1.649 | 1.627 | 1.535 |       |       |       |
| 1.217 | 1.201 |  | 1.149 |       |       |       |       |       |       |       |       |
| 1.205 | 1.143 |  | 1.109 |       |       |       |       |       |       |       |       |
| 0.935 | 0.845 |  | 1.182 |       |       |       |       |       |       |       |       |
| 0.477 | 0.469 |  | 1.181 |       |       |       |       |       |       |       |       |
| 0.360 | 0.323 |  | 1.167 |       |       |       |       |       |       |       |       |
| 0.229 | 0.200 |  |       |       |       | 0.049 | 0.047 | 0.048 | 0.049 | 0.049 | 0.049 |
| 0.125 | 0.110 |  |       |       |       | 0.048 | 0.054 | 0.052 | 0.052 | 0.052 | 0.051 |

6

|       |       |       |       |       |       |       |       |       |       |       |       |
|-------|-------|-------|-------|-------|-------|-------|-------|-------|-------|-------|-------|
| 1.013 | 0.810 |       | 0.668 | 0.808 | 0.940 | 0.720 | 0.798 | 0.687 | 0.904 | 0.845 | 0.043 |
| 0.709 | 0.827 |       | 0.703 | 0.142 | 0.156 | 0.136 | 0.137 | 0.116 | 0.990 | 0.846 | 0.042 |
| 0.682 | 0.692 |       | 0.680 | 0.197 | 0.188 | 0.190 | 0.191 | 0.184 | 1.023 | 0.861 | 0.043 |
| 0.507 | 0.519 |       | 0.740 | 0.316 | 0.264 | 0.364 | 0.377 | 0.312 | 1.111 | 0.870 | 0.043 |
| 0.394 | 0.406 |       | 0.682 | 0.580 | 0.561 | 0.600 | 0.529 | 0.563 | 0.962 | 0.834 | 0.042 |
| 0.333 | 0.322 |       | 0.661 | 0.995 | 0.930 | 0.848 | 0.832 | 0.797 | 0.037 | 0.037 | 0.037 |
| 0.229 | 0.201 | 0.843 | 0.679 | 0.732 |       | 0.048 | 0.046 | 0.047 |       |       | 0.047 |
| 0.124 | 0.111 | 0.773 | 0.682 | 0.701 |       | 0.047 | 0.053 | 0.051 | 0.051 | 0.052 | 0.051 |

7

skin cultivation



|  |  |  |  |       |       |       |       |       |       |       |       |
|--|--|--|--|-------|-------|-------|-------|-------|-------|-------|-------|
|  |  |  |  | 0.367 | 0.392 | 0.213 | 0.195 | 0.226 | 0.257 | 0.308 | 0.408 |
|  |  |  |  |       |       | 0.051 | 0.051 | 0.051 | 0.053 | 0.051 | 0.054 |
|  |  |  |  |       |       | 0.050 | 0.050 | 0.052 | 0.051 | 0.050 | 0.050 |

|       |       |       |       |  |  |       |       |       |       |       |       |               |
|-------|-------|-------|-------|--|--|-------|-------|-------|-------|-------|-------|---------------|
| 0.491 | 0.574 | 0.518 | 0.380 |  |  |       |       |       |       |       |       | T11 1 hum sui |
| 0.074 | 0.073 | 0.106 | 0.089 |  |  |       |       |       |       |       |       |               |
| 0.689 | 0.516 | 0.535 | 0.209 |  |  |       |       |       |       |       |       |               |
|       | 0.352 | 0.464 | 0.727 |  |  |       |       |       |       |       |       |               |
| 0.433 | 0.289 | 0.165 | 0.224 |  |  |       |       |       |       |       |       |               |
| 0.402 | 0.254 | 0.296 | 0.329 |  |  |       |       |       |       |       |       |               |
|       |       |       |       |  |  | 0.052 | 0.051 | 0.051 | 0.053 | 0.051 | 0.051 |               |
|       |       |       |       |  |  | 0.049 | 0.049 | 0.050 | 0.050 | 0.049 | 0.049 |               |

|  |  |  |  |       |       |       |       |       |       |       |       |               |
|--|--|--|--|-------|-------|-------|-------|-------|-------|-------|-------|---------------|
|  |  |  |  | 0.502 | 0.545 | 0.613 | 0.593 | 0.579 | 0.537 | 0.385 | 0.388 | T11 2 hum sui |
|  |  |  |  | 0.206 | 0.205 | 0.187 | 0.189 | 0.187 | 0.177 | 0.122 | 0.114 |               |
|  |  |  |  | 0.731 | 0.737 | 0.575 | 0.570 | 0.538 | 0.531 | 0.208 | 0.207 |               |
|  |  |  |  |       |       | 0.358 | 0.336 | 0.471 | 0.480 | 0.747 | 0.716 |               |
|  |  |  |  | 0.423 | 0.402 | 0.227 | 0.267 | 0.154 | 0.156 | 0.234 | 0.235 |               |
|  |  |  |  | 0.354 | 0.398 | 0.217 | 0.229 | 0.248 | 0.272 | 0.308 | 0.317 |               |
|  |  |  |  |       |       | 0.052 | 0.052 | 0.052 | 0.056 | 0.052 | 0.052 |               |
|  |  |  |  |       |       | 0.050 | 0.050 | 0.050 | 0.050 | 0.050 | 0.049 |               |



|                    |              |                              |                            |                              |                              |
|--------------------|--------------|------------------------------|----------------------------|------------------------------|------------------------------|
| Project number     | F-120        | Apparatus                    | Wallac Victor              | Operator                     | IsBa                         |
| GLP Study (Number) | n.a.         | Protocol (instrument method) | LDH test 2016              | Date of preparation          | 19-04-18                     |
| hot substance      | isotope      | File name (results)          | IsBa_180419/20_LDH_full_v2 | Date of measurement          | 19-04-18                     |
|                    | name         | Kind of well plate           | 96 well                    | shaking time [min]           | 30                           |
| cold substance     | ACB-ID       | sample volume [µL]           | 100                        | stirring rate (Target) [rpm] | 150                          |
|                    | Batch number | Cocktail volume [µL]         | 175                        | Kind of measurement          | UV-vis                       |
|                    | name         | ACB-ID of cocktail           |                            | Wave length [nm]             | 450                          |
|                    | ACB-ID       | Matrix                       | DMEM (from powder)+PEG     | Remarks                      | Cocktail 100µl RM, 75µl STOP |
|                    | Batch number | Blank description            | DMEM/PEG, H2O              | Remarks                      | 7 standards split low/high   |
| n.a.               | n.a.         | Pipettes (No. / volume)      | 50-200µl                   | Remarks                      | KLP4 common for both         |
| n.a.               | n.a.         | Pipettes (No. / volume)      | n.a.                       | Remarks                      | n.a.                         |

Messdaten (diese Tabelle in Bericht übernehmen)

| Sample name * | concentration (theor.) * | measured data | measured data | mean measured | SD    | RSD   | Blank * | measured data after * Blank subtraction | concentration (calc.) * | Deviation * | Residuen |
|---------------|--------------------------|---------------|---------------|---------------|-------|-------|---------|-----------------------------------------|-------------------------|-------------|----------|
|               | [µg/mL]                  | [AU]          | [AU]          | [AU]          | [AU]  | [%]   | [AU]    |                                         | [µg/mL]                 | [%]         |          |
| KLP1          |                          |               |               |               |       |       | 0.047   |                                         |                         |             |          |
| KLP2          |                          |               |               |               |       |       | 0.054   |                                         |                         |             |          |
| KLP3          |                          |               |               |               |       |       | 0.051   |                                         |                         |             |          |
| KLP4          | 0.041                    | 0.959         | 0.972         | 0.883         | 0.938 | 0.04  | 4.19    | 0.051                                   | 0.887                   | 0.041       | -0.57    |
| KLP5          | 0.018                    | 0.483         | 0.484         | 0.474         | 0.480 | 0.00  | 0.98    | 0.052                                   | 0.429                   | 0.019       | 2.42     |
| KLP6          | 0.012                    | 0.360         | 0.359         | 0.326         | 0.348 | 0.02  | 4.54    | 0.051                                   | 0.297                   | 0.013       | 5.00     |
| KLP7          | 0.007                    | 0.228         | 0.228         | 0.199         | 0.218 | 0.014 | 6.35    |                                         | 0.168                   | 0.006       | -11.29   |
| KLP8          |                          |               |               |               |       |       |         |                                         |                         |             |          |

Statistical data

|                                              |                                          |                     |              |
|----------------------------------------------|------------------------------------------|---------------------|--------------|
| Geradensteigung                              | Slope                                    | m                   | 21.03        |
| Y-Achsenabschnitt                            | Y-Intercept                              | b                   | 0.03         |
| Standardabw. Geradensteigung                 | SD-Slope                                 | S <sub>m</sub>      | 0.648055501  |
| Standardabw. Achsenabschnittes               | SD-Y-Intercept                           | S <sub>b</sub>      | 0.015177452  |
| Anzahl Messpunkte                            | number of measuring points               | n                   | 4            |
| Quadratsumme                                 | sum of squares                           | Q <sub>xx</sub>     | 0.000664046  |
| Bereichsmittle                               |                                          |                     | 0.019557193  |
| Freiheitsgrade                               | degree of freedom                        | f                   | 2            |
| Student-t-Faktor für (P = 95 %; f = n-2)     | Student-t-factor for (P = 95 %; f = n-2) | t                   | 4.303        |
| Vertrauensbereich Steig. (95 %) Obergrenze   |                                          | m + VB <sub>m</sub> | 23.81763508  |
| Vertrauensbereich Steig. (95 %) Untergrenze  |                                          | m - VB <sub>m</sub> | 18.24046944  |
| Vertrauensbereich Achsenabschnitt (95 %) Og. |                                          | b + VB <sub>b</sub> | 0.099335829  |
| Vertrauensbereich Achsenabschnitt (95 %) Ug. |                                          | b - VB <sub>b</sub> | -0.031281327 |
| Korrelationskoeffizient                      | correlation coefficient                  | r                   | 0.9991       |
| Bestimmtheitsmaß                             | determination coefficient                | r <sup>2</sup>      | 0.9981       |
| Reststandardabweichung                       |                                          | S <sub>0</sub>      | 0.01669983   |
| Summe Restquadrate                           |                                          | sd                  | 0.657385838  |
| Verfahrensstandardabw.                       |                                          | S <sub>00</sub>     | 0.000794131  |
| Rel. Verfahrensstandardabw. %                |                                          | V <sub>00</sub>     | 4.060559029  |

Berichten

|                          |       |
|--------------------------|-------|
| mean Blank               | 0     |
| SD Blank                 | 0.00  |
| RSD Blank                | 3.79  |
| x <sup>2</sup> SD (LLOQ) | 0.01  |
| x <sup>2</sup> SD (LOD)  | 0.01  |
| LLOQ (AU)                | 0.061 |
| LOD (AU)                 | 0.067 |
| ULOQ                     | 0.887 |
| LLOQ (Lin)               | 0.168 |

Evaluation / Comment

LDH linearity valid with 7 standards, split in lin high and lin low, each with 4 standards and KLP4 common standard for both. R<sup>2</sup> 0,9981, deviations for both between -13.34% and +13.04%

Date Operator Date Operator Control

Figure 1 Linearity

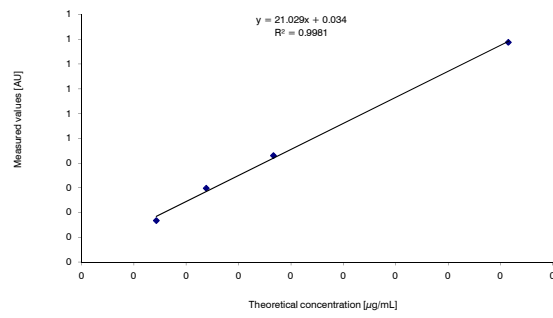

Figure 2 Method validation Residuen Plot

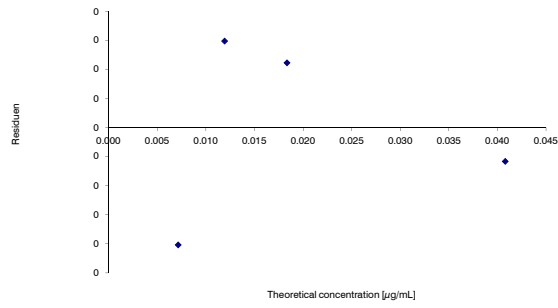

Evaluation / Comment

lin passed

Date

Operator

Date

Control

| Sample name | Plate | Position | [AU]  | [AU]-Blank | Rating       | [µg/mL] | Dilution factor | [µg/mL] |
|-------------|-------|----------|-------|------------|--------------|---------|-----------------|---------|
| 0           | T12   | A01      | 0     | 0          | kleiner LLOQ | #VALUE! | 1               | #VALUE! |
| 0           | T12   | A02      | 0     | 0          | kleiner LLOQ | #VALUE! | 1               | #VALUE! |
| 0           | T12   | A03      | 0     | 0          | kleiner LLOQ | #VALUE! | 1               | #VALUE! |
| 0           | T12   | A04      | 0     | 0          | kleiner LLOQ | #VALUE! | 1               | #VALUE! |
| T12HN1      | T12   | A05      | 0.519 | 0.468      | 0.468        | 0.021   | 2.75            | 0.057   |
| T12HN1      | T12   | A06      | 0.533 | 0.482      | 0.482        | 0.021   | 2.75            | 0.059   |
| T12HN2      | T12   | A07      | 0.518 | 0.467      | 0.467        | 0.021   | 2.75            | 0.057   |
| T12HN2      | T12   | A08      | 0.519 | 0.468      | 0.468        | 0.021   | 2.75            | 0.057   |
| T12HN3      | T12   | A09      | 0.484 | 0.433      | 0.433        | 0.019   | 2.75            | 0.052   |
| T12HN3      | T12   | A10      | 0.513 | 0.462      | 0.462        | 0.020   | 2.75            | 0.056   |
| T12HN4      | T12   | A11      | 0.362 | 0.311      | 0.311        | 0.013   | 2.75            | 0.036   |
| T12HN4      | T12   | A12      | 0.354 | 0.303      | 0.303        | 0.013   | 2.75            | 0.035   |
| 0           | T12   | B01      | 0.000 | -0.051     | kleiner LLOQ | #VALUE! | 1               | #VALUE! |
| 0           | T12   | B02      | 0.000 | -0.051     | kleiner LLOQ | #VALUE! | 1               | #VALUE! |
| 0           | T12   | B03      | 0.000 | -0.051     | kleiner LLOQ | #VALUE! | 1               | #VALUE! |
| 0           | T12   | B04      | 0.000 | -0.051     | kleiner LLOQ | #VALUE! | 1               | #VALUE! |
| T12HS11     | T12   | B05      | 0.206 | 0.156      | kleiner LLOQ | #VALUE! | 2.75            | #VALUE! |
| T12HS11     | T12   | B06      | 0.207 | 0.156      | kleiner LLOQ | #VALUE! | 2.75            | #VALUE! |
| T12HS12     | T12   | B07      | 0.164 | 0.113      | kleiner LLOQ | #VALUE! | 2.75            | #VALUE! |
| T12HS12     | T12   | B08      | 0.166 | 0.115      | kleiner LLOQ | #VALUE! | 2.75            | #VALUE! |
| T12HS13     | T12   | B09      | 0.196 | 0.145      | kleiner LLOQ | #VALUE! | 2.75            | #VALUE! |
| T12HS13     | T12   | B10      | 0.182 | 0.132      | kleiner LLOQ | #VALUE! | 2.75            | #VALUE! |
| T12HS14     | T12   | B11      | 0.199 | 0.148      | kleiner LLOQ | #VALUE! | 2.75            | #VALUE! |
| T12HS14     | T12   | B12      | 0.199 | 0.148      | kleiner LLOQ | #VALUE! | 2.75            | #VALUE! |
| 0           | T12   | C01      | 0.000 | -0.051     | kleiner LLOQ | #VALUE! | 1               | #VALUE! |
| 0           | T12   | C02      | 0.000 | -0.051     | kleiner LLOQ | #VALUE! | 1               | #VALUE! |
| 0           | T12   | C03      | 0.000 | -0.051     | kleiner LLOQ | #VALUE! | 1               | #VALUE! |
| 0           | T12   | C04      | 0.000 | -0.051     | kleiner LLOQ | #VALUE! | 1               | #VALUE! |
| T12HS21     | T12   | C05      | 0.835 | 0.784      | 0.784        | 0.036   | 2.75            | 0.098   |
| T12HS21     | T12   | C06      | 0.831 | 0.780      | 0.780        | 0.035   | 2.75            | 0.098   |
| T12HS22     | T12   | C07      | 0.740 | 0.689      | 0.689        | 0.031   | 2.75            | 0.086   |
| T12HS22     | T12   | C08      | 0.760 | 0.709      | 0.709        | 0.032   | 2.75            | 0.088   |
| T12HS23     | T12   | C09      | 0.624 | 0.573      | 0.573        | 0.026   | 2.75            | 0.070   |
| T12HS23     | T12   | C10      | 0.633 | 0.582      | 0.582        | 0.026   | 2.75            | 0.072   |
| T12HS24     | T12   | C11      | 0.245 | 0.194      | 0.194        | 0.008   | 2.75            | 0.021   |
| T12HS24     | T12   | C12      | 0.234 | 0.183      | 0.183        | 0.007   | 2.75            | 0.020   |
| 0           | T12   | D01      | 0.000 | -0.051     | kleiner LLOQ | #VALUE! | 1               | #VALUE! |
| 0           | T12   | D02      | 0.000 | -0.051     | kleiner LLOQ | #VALUE! | 1               | #VALUE! |
| 0           | T12   | D03      | 0.000 | -0.051     | kleiner LLOQ | #VALUE! | 1               | #VALUE! |
| 0           | T12   | D04      | 0.000 | -0.051     | kleiner LLOQ | #VALUE! | 1               | #VALUE! |
| 0           | T12   | D05      | 0.000 | -0.051     | kleiner LLOQ | #VALUE! | 1               | #VALUE! |
| 0           | T12   | D06      | 0.000 | -0.051     | kleiner LLOQ | #VALUE! | 1               | #VALUE! |
| 0           | T12   | D07      | 0     | 0          | kleiner LLOQ | #VALUE! | 1               | #VALUE! |
| 0           | T12   | D08      | 0     | 0          | kleiner LLOQ | #VALUE! | 1               | #VALUE! |
| 0           | T12   | D09      | 0     | 0          | kleiner LLOQ | #VALUE! | 1               | #VALUE! |
| 0           | T12   | D10      | 0     | 0          | kleiner LLOQ | #VALUE! | 1               | #VALUE! |
| 0           | T12   | D11      | 0     | 0          | kleiner LLOQ | #VALUE! | 1               | #VALUE! |
| 0           | T12   | D12      | 0     | 0          | kleiner LLOQ | #VALUE! | 1               | #VALUE! |

Plate: T12

| Test | Test | Test | Test | Test   | Test   | Test   | Test   | Test   | Test   | Test   | Test   | Test | Test |
|------|------|------|------|--------|--------|--------|--------|--------|--------|--------|--------|------|------|
| 1    | 2    | 3    | 4    | 5      | 6      | 7      | 8      | 9      | 10     | 11     | 12     |      |      |
| A    |      |      |      | 0.5187 | 0.5327 | 0.5178 | 0.5189 | 0.4838 | 0.5125 | 0.3623 | 0.3541 |      |      |
| B    |      |      |      | 0.2065 | 0.2068 | 0.1642 | 0.1658 | 0.1957 | 0.1825 | 0.1990 | 0.1987 |      |      |
| C    |      |      |      | 0.8350 | 0.8308 | 0.7404 | 0.7598 | 0.6239 | 0.6333 | 0.2450 | 0.2342 |      |      |
| D    |      |      |      |        |        |        |        |        |        |        |        |      |      |
| E    |      |      |      |        |        |        |        |        |        |        |        |      |      |
| F    |      |      |      |        |        |        |        |        |        |        |        |      |      |
| G    |      |      |      |        |        | 0.0490 | 0.0493 | 0.0495 | 0.0492 | 0.0492 | 0.0487 |      |      |
| H    |      |      |      |        |        | 0.0475 | 0.0473 | 0.0474 | 0.0475 | 0.0475 | 0.0469 |      |      |

Plattenbelegung

|   | 1 | 2 | 3 | 4 | 5       | 6       | 7       | 8            | 9            | 10           | 11           | 12           |
|---|---|---|---|---|---------|---------|---------|--------------|--------------|--------------|--------------|--------------|
| A |   |   |   |   | T12HN1  | T12HN1  | T12HN2  | T12HN2       | T12HN3       | T12HN3       | T12HN4       | T12HN4       |
| B |   |   |   |   | T12HS11 | T12HS11 | T12HS12 | T12HS12      | T12HS13      | T12HS13      | T12HS14      | T12HS14      |
| C |   |   |   |   | T12HS21 | T12HS21 | T12HS22 | T12HS22      | T12HS23      | T12HS23      | T12HS24      | T12HS24      |
| D |   |   |   |   |         |         |         |              |              |              |              |              |
| E |   |   |   |   |         |         |         |              |              |              |              |              |
| F |   |   |   |   |         |         |         |              |              |              |              |              |
| G |   |   |   |   |         |         |         | Blank PEG    | Blank PEG    | Blank PEG    | Blank PEG    | Blank PEG    |
| H |   |   |   |   |         |         |         | Blank no PEG | Blank no PEG | Blank no PEG | Blank no PEG | Blank no PEG |

Samples aufgeteilt in lin high und low; höher konzentrierte Samples bei lin high zu finden.

Comment:

Date Operator

Date Control

|              |     |     |   |   |              |         |      |         |
|--------------|-----|-----|---|---|--------------|---------|------|---------|
| 0            | T12 | E01 | 0 | 0 | kleiner LLOQ | #VALUE! | 1    | #VALUE! |
| 0            | T12 | E02 | 0 | 0 | kleiner LLOQ | #VALUE! | 1    | #VALUE! |
| 0            | T12 | E03 | 0 | 0 | kleiner LLOQ | #VALUE! | 1    | #VALUE! |
| 0            | T12 | E04 | 0 | 0 | kleiner LLOQ | #VALUE! | 1    | #VALUE! |
| 0            | T12 | E05 | 0 | 0 | kleiner LLOQ | #VALUE! | 1    | #VALUE! |
| 0            | T12 | E06 | 0 | 0 | kleiner LLOQ | #VALUE! | 1    | #VALUE! |
| 0            | T12 | E07 | 0 | 0 | kleiner LLOQ | #VALUE! | 1    | #VALUE! |
| 0            | T12 | E08 | 0 | 0 | kleiner LLOQ | #VALUE! | 1    | #VALUE! |
| 0            | T12 | E09 | 0 | 0 | kleiner LLOQ | #VALUE! | 1    | #VALUE! |
| 0            | T12 | E10 | 0 | 0 | kleiner LLOQ | #VALUE! | 1    | #VALUE! |
| 0            | T12 | E11 | 0 | 0 | kleiner LLOQ | #VALUE! | 1    | #VALUE! |
| 0            | T12 | E12 | 0 | 0 | kleiner LLOQ | #VALUE! | 1    | #VALUE! |
| 0            | T12 | F01 | 0 | 0 | kleiner LLOQ | #VALUE! | 1    | #VALUE! |
| 0            | T12 | F02 | 0 | 0 | kleiner LLOQ | #VALUE! | 1    | #VALUE! |
| 0            | T12 | F03 | 0 | 0 | kleiner LLOQ | #VALUE! | 1    | #VALUE! |
| 0            | T12 | F04 | 0 | 0 | kleiner LLOQ | #VALUE! | 1    | #VALUE! |
| 0            | T12 | F05 | 0 | 0 | kleiner LLOQ | #VALUE! | 1    | #VALUE! |
| 0            | T12 | F06 | 0 | 0 | kleiner LLOQ | #VALUE! | 1    | #VALUE! |
| 0            | T12 | F07 | 0 | 0 | kleiner LLOQ | #VALUE! | 1    | #VALUE! |
| 0            | T12 | F08 | 0 | 0 | kleiner LLOQ | #VALUE! | 1    | #VALUE! |
| 0            | T12 | F09 | 0 | 0 | kleiner LLOQ | #VALUE! | 1    | #VALUE! |
| 0            | T12 | F10 | 0 | 0 | kleiner LLOQ | #VALUE! | 1    | #VALUE! |
| 0            | T12 | F11 | 0 | 0 | kleiner LLOQ | #VALUE! | 1    | #VALUE! |
| 0            | T12 | F12 | 0 | 0 | kleiner LLOQ | #VALUE! | 1    | #VALUE! |
| 0            | T12 | G01 | 0 | 0 | kleiner LLOQ | #VALUE! | 1    | #VALUE! |
| 0            | T12 | G02 | 0 | 0 | kleiner LLOQ | #VALUE! | 1    | #VALUE! |
| 0            | T12 | G03 | 0 | 0 | kleiner LLOQ | #VALUE! | 1    | #VALUE! |
| 0            | T12 | G04 | 0 | 0 | kleiner LLOQ | #VALUE! | 1    | #VALUE! |
| 0            | T12 | G05 | 0 | 0 | kleiner LLOQ | #VALUE! | 1    | #VALUE! |
| 0            | T12 | G06 | 0 | 0 | kleiner LLOQ | #VALUE! | 1    | #VALUE! |
| Blank PEG    | T12 | G07 | 0 | 0 | kleiner LLOQ | #VALUE! | 2,75 | #VALUE! |
| Blank PEG    | T12 | G08 | 0 | 0 | kleiner LLOQ | #VALUE! | 2,75 | #VALUE! |
| Blank PEG    | T12 | G09 | 0 | 0 | kleiner LLOQ | #VALUE! | 2,75 | #VALUE! |
| Blank PEG    | T12 | G10 | 0 | 0 | kleiner LLOQ | #VALUE! | 2,75 | #VALUE! |
| Blank PEG    | T12 | G11 | 0 | 0 | kleiner LLOQ | #VALUE! | 2,75 | #VALUE! |
| Blank PEG    | T12 | G12 | 0 | 0 | kleiner LLOQ | #VALUE! | 2,75 | #VALUE! |
| 0            | T12 | H01 | 0 | 0 | kleiner LLOQ | #VALUE! | 1    | #VALUE! |
| 0            | T12 | H02 | 0 | 0 | kleiner LLOQ | #VALUE! | 1    | #VALUE! |
| 0            | T12 | H03 | 0 | 0 | kleiner LLOQ | #VALUE! | 1    | #VALUE! |
| 0            | T12 | H04 | 0 | 0 | kleiner LLOQ | #VALUE! | 1    | #VALUE! |
| 0            | T12 | H05 | 0 | 0 | kleiner LLOQ | #VALUE! | 1    | #VALUE! |
| 0            | T12 | H06 | 0 | 0 | kleiner LLOQ | #VALUE! | 1    | #VALUE! |
| Blank no PEG | T12 | H07 | 0 | 0 | kleiner LLOQ | #VALUE! | 2,75 | #VALUE! |
| Blank no PEG | T12 | H08 | 0 | 0 | kleiner LLOQ | #VALUE! | 2,75 | #VALUE! |
| Blank no PEG | T12 | H09 | 0 | 0 | kleiner LLOQ | #VALUE! | 2,75 | #VALUE! |
| Blank no PEG | T12 | H10 | 0 | 0 | kleiner LLOQ | #VALUE! | 2,75 | #VALUE! |
| Blank no PEG | T12 | H11 | 0 | 0 | kleiner LLOQ | #VALUE! | 2,75 | #VALUE! |
| Blank no PEG | T12 | H12 | 0 | 0 | kleiner LLOQ | #VALUE! | 2,75 | #VALUE! |

|         |     |     |       |        |              |         |      |         |
|---------|-----|-----|-------|--------|--------------|---------|------|---------|
| 0       | T13 | A01 | 0     | 0      | kleiner LLOQ | #VALUE! | 1    | #VALUE! |
| 0       | T13 | A02 | 0     | 0      | kleiner LLOQ | #VALUE! | 1    | #VALUE! |
| 0       | T13 | A03 | 0     | 0      | kleiner LLOQ | #VALUE! | 1    | #VALUE! |
| 0       | T13 | A04 | 0     | 0      | kleiner LLOQ | #VALUE! | 1    | #VALUE! |
| T13HN1  | T13 | A05 | 0.454 | 0.403  | 0.403        | 0.018   | 2.75 | 0.048   |
| T13HN1  | T13 | A06 | 0.424 | 0.373  | 0.373        | 0.016   | 2.75 | 0.044   |
| T13HN2  | T13 | A07 | 0.350 | 0.299  | 0.299        | 0.013   | 2.75 | 0.035   |
| T13HN2  | T13 | A08 | 0.386 | 0.335  | 0.335        | 0.014   | 2.75 | 0.039   |
| T13HN3  | T13 | A09 | 0.444 | 0.393  | 0.393        | 0.017   | 2.75 | 0.047   |
| T13HN3  | T13 | A10 | 0.434 | 0.383  | 0.383        | 0.017   | 2.75 | 0.046   |
| T13HN4  | T13 | A11 | 0.382 | 0.331  | 0.331        | 0.014   | 2.75 | 0.039   |
| T13HN4  | T13 | A12 | 0.382 | 0.332  | 0.332        | 0.014   | 2.75 | 0.039   |
| 0       | T13 | B01 | 0.000 | -0.051 | kleiner LLOQ | #VALUE! | 1    | #VALUE! |
| 0       | T13 | B02 | 0.000 | -0.051 | kleiner LLOQ | #VALUE! | 1    | #VALUE! |
| 0       | T13 | B03 | 0.000 | -0.051 | kleiner LLOQ | #VALUE! | 1    | #VALUE! |
| 0       | T13 | B04 | 0.000 | -0.051 | kleiner LLOQ | #VALUE! | 1    | #VALUE! |
| T13HS11 | T13 | B05 | 0.158 | 0.107  | kleiner LLOQ | #VALUE! | 2.75 | #VALUE! |
| T13HS11 | T13 | B06 | 0.201 | 0.150  | kleiner LLOQ | #VALUE! | 2.75 | #VALUE! |
| T13HS12 | T13 | B07 | 0.183 | 0.132  | kleiner LLOQ | #VALUE! | 2.75 | #VALUE! |
| T13HS12 | T13 | B08 | 0.182 | 0.131  | kleiner LLOQ | #VALUE! | 2.75 | #VALUE! |
| T13HS13 | T13 | B09 | 0.159 | 0.108  | kleiner LLOQ | #VALUE! | 2.75 | #VALUE! |
| T13HS13 | T13 | B10 | 0.156 | 0.105  | kleiner LLOQ | #VALUE! | 2.75 | #VALUE! |
| T13HS14 | T13 | B11 | 0.184 | 0.133  | kleiner LLOQ | #VALUE! | 2.75 | #VALUE! |
| T13HS14 | T13 | B12 | 0.190 | 0.139  | kleiner LLOQ | #VALUE! | 2.75 | #VALUE! |
| 0       | T13 | C01 | 0.000 | -0.051 | kleiner LLOQ | #VALUE! | 1    | #VALUE! |
| 0       | T13 | C02 | 0.000 | -0.051 | kleiner LLOQ | #VALUE! | 1    | #VALUE! |
| 0       | T13 | C03 | 0.000 | -0.051 | kleiner LLOQ | #VALUE! | 1    | #VALUE! |
| 0       | T13 | C04 | 0.000 | -0.051 | kleiner LLOQ | #VALUE! | 1    | #VALUE! |
| T13HS21 | T13 | C05 | 0.933 | 0.882  | 0.882        | 0.040   | 2.75 | 0.111   |
| T13HS21 | T13 | C06 | 0.873 | 0.822  | 0.822        | 0.037   | 2.75 | 0.103   |
| T13HS22 | T13 | C07 | 0.744 | 0.694  | 0.694        | 0.031   | 2.75 | 0.086   |
| T13HS22 | T13 | C08 | 0.758 | 0.707  | 0.707        | 0.032   | 2.75 | 0.088   |
| T13HS23 | T13 | C09 | 0.539 | 0.488  | 0.488        | 0.022   | 2.75 | 0.059   |
| T13HS23 | T13 | C10 | 0.581 | 0.530  | 0.530        | 0.024   | 2.75 | 0.065   |
| T13HS24 | T13 | C11 | 0.256 | 0.205  | 0.205        | 0.008   | 2.75 | 0.022   |
| T13HS24 | T13 | C12 | 0.289 | 0.238  | 0.238        | 0.010   | 2.75 | 0.027   |
| 0       | T13 | D01 | 0     | 0      | kleiner LLOQ | #VALUE! | 1    | #VALUE! |
| 0       | T13 | D02 | 0     | 0      | kleiner LLOQ | #VALUE! | 1    | #VALUE! |
| 0       | T13 | D03 | 0     | 0      | kleiner LLOQ | #VALUE! | 1    | #VALUE! |
| 0       | T13 | D04 | 0     | 0      | kleiner LLOQ | #VALUE! | 1    | #VALUE! |
| 0       | T13 | D05 | 0     | 0      | kleiner LLOQ | #VALUE! | 1    | #VALUE! |
| 0       | T13 | D06 | 0     | 0      | kleiner LLOQ | #VALUE! | 1    | #VALUE! |
| 0       | T13 | D07 | 0     | 0      | kleiner LLOQ | #VALUE! | 1    | #VALUE! |
| 0       | T13 | D08 | 0     | 0      | kleiner LLOQ | #VALUE! | 1    | #VALUE! |
| 0       | T13 | D09 | 0     | 0      | kleiner LLOQ | #VALUE! | 1    | #VALUE! |
| 0       | T13 | D10 | 0     | 0      | kleiner LLOQ | #VALUE! | 1    | #VALUE! |
| 0       | T13 | D11 | 0     | 0      | kleiner LLOQ | #VALUE! | 1    | #VALUE! |
| 0       | T13 | D12 | 0     | 0      | kleiner LLOQ | #VALUE! | 1    | #VALUE! |

Plate: T13

|   |   |   |   |   |       |       |       |       |       |       |       |       |
|---|---|---|---|---|-------|-------|-------|-------|-------|-------|-------|-------|
|   | 1 | 2 | 3 | 4 | 5     | 6     | 7     | 8     | 9     | 10    | 11    | 12    |
| A |   |   |   |   | 0.454 | 0.424 | 0.350 | 0.386 | 0.444 | 0.434 | 0.382 | 0.382 |
| B |   |   |   |   | 0.158 | 0.201 | 0.183 | 0.182 | 0.159 | 0.156 | 0.184 | 0.190 |
| C |   |   |   |   | 0.933 | 0.873 | 0.744 | 0.758 | 0.539 | 0.581 | 0.256 | 0.289 |
| D |   |   |   |   |       |       |       |       |       |       |       |       |
| E |   |   |   |   |       |       |       |       |       |       |       |       |
| F |   |   |   |   |       |       |       |       |       |       |       |       |
| G |   |   |   |   |       |       | 0.050 | 0.050 | 0.053 | 0.051 | 0.051 | 0.050 |
| H |   |   |   |   |       |       | 0.048 | 0.048 | 0.048 | 0.048 | 0.048 | 0.048 |

Plattenbelegung

|   |   |   |   |   |         |         |              |              |              |              |              |              |
|---|---|---|---|---|---------|---------|--------------|--------------|--------------|--------------|--------------|--------------|
|   | 1 | 2 | 3 | 4 | 5       | 6       | 7            | 8            | 9            | 10           | 11           | 12           |
| A |   |   |   |   | T13HN1  | T13HN1  | T13HN2       | T13HN2       | T13HN3       | T13HN3       | T13HN4       | T13HN4       |
| B |   |   |   |   | T13HS11 | T13HS11 | T13HS12      | T13HS12      | T13HS13      | T13HS13      | T13HS14      | T13HS14      |
| C |   |   |   |   | T13HS21 | T13HS21 | T13HS22      | T13HS22      | T13HS23      | T13HS23      | T13HS24      | T13HS24      |
| D |   |   |   |   |         |         |              |              |              |              |              |              |
| E |   |   |   |   |         |         |              |              |              |              |              |              |
| F |   |   |   |   |         |         |              |              |              |              |              |              |
| G |   |   |   |   |         |         | Blank PEG    | Blank PEG    | Blank PEG    | Blank PEG    | Blank PEG    | Blank PEG    |
| H |   |   |   |   |         |         | Blank no PEG | Blank no PEG | Blank no PEG | Blank no PEG | Blank no PEG | Blank no PEG |

Comment:

Date Operator \_\_\_\_\_ Date Control \_\_\_\_\_

|              |     |     |       |        |              |         |      |         |
|--------------|-----|-----|-------|--------|--------------|---------|------|---------|
| 0            | T13 | E01 | 0     | 0      | kleiner LLOQ | #VALUE! | 1    | #VALUE! |
| 0            | T13 | E02 | 0     | 0      | kleiner LLOQ | #VALUE! | 1    | #VALUE! |
| 0            | T13 | E03 | 0     | 0      | kleiner LLOQ | #VALUE! | 1    | #VALUE! |
| 0            | T13 | E04 | 0     | 0      | kleiner LLOQ | #VALUE! | 1    | #VALUE! |
| 0            | T13 | E05 | 0     | 0      | kleiner LLOQ | #VALUE! | 1    | #VALUE! |
| 0            | T13 | E06 | 0     | 0      | kleiner LLOQ | #VALUE! | 1    | #VALUE! |
| 0            | T13 | E07 | 0     | 0      | kleiner LLOQ | #VALUE! | 1    | #VALUE! |
| 0            | T13 | E08 | 0     | 0      | kleiner LLOQ | #VALUE! | 1    | #VALUE! |
| 0            | T13 | E09 | 0     | 0      | kleiner LLOQ | #VALUE! | 1    | #VALUE! |
| 0            | T13 | E10 | 0     | 0      | kleiner LLOQ | #VALUE! | 1    | #VALUE! |
| 0            | T13 | E11 | 0     | 0      | kleiner LLOQ | #VALUE! | 1    | #VALUE! |
| 0            | T13 | E12 | 0     | 0      | kleiner LLOQ | #VALUE! | 1    | #VALUE! |
| 0            | T13 | F01 | 0     | 0      | kleiner LLOQ | #VALUE! | 1    | #VALUE! |
| 0            | T13 | F02 | 0     | 0      | kleiner LLOQ | #VALUE! | 1    | #VALUE! |
| 0            | T13 | F03 | 0     | 0      | kleiner LLOQ | #VALUE! | 1    | #VALUE! |
| 0            | T13 | F04 | 0     | 0      | kleiner LLOQ | #VALUE! | 1    | #VALUE! |
| 0            | T13 | F05 | 0     | 0      | kleiner LLOQ | #VALUE! | 1    | #VALUE! |
| 0            | T13 | F06 | 0     | 0      | kleiner LLOQ | #VALUE! | 1    | #VALUE! |
| 0            | T13 | F07 | 0     | 0      | kleiner LLOQ | #VALUE! | 1    | #VALUE! |
| 0            | T13 | F08 | 0     | 0      | kleiner LLOQ | #VALUE! | 1    | #VALUE! |
| 0            | T13 | F09 | 0     | 0      | kleiner LLOQ | #VALUE! | 1    | #VALUE! |
| 0            | T13 | F10 | 0     | 0      | kleiner LLOQ | #VALUE! | 1    | #VALUE! |
| 0            | T13 | F11 | 0     | 0      | kleiner LLOQ | #VALUE! | 1    | #VALUE! |
| 0            | T13 | F12 | 0     | 0      | kleiner LLOQ | #VALUE! | 1    | #VALUE! |
| 0            | T13 | G01 | 0     | 0      | kleiner LLOQ | #VALUE! | 1    | #VALUE! |
| 0            | T13 | G02 | 0     | 0      | kleiner LLOQ | #VALUE! | 1    | #VALUE! |
| 0            | T13 | G03 | 0     | 0      | kleiner LLOQ | #VALUE! | 1    | #VALUE! |
| 0            | T13 | G04 | 0     | 0      | kleiner LLOQ | #VALUE! | 1    | #VALUE! |
| 0            | T13 | G05 | 0     | 0      | kleiner LLOQ | #VALUE! | 1    | #VALUE! |
| 0            | T13 | G06 | 0     | 0      | kleiner LLOQ | #VALUE! | 1    | #VALUE! |
| Blank PEG    | T13 | G07 | 0     | 0      | kleiner LLOQ | #VALUE! | 2.75 | #VALUE! |
| Blank PEG    | T13 | G08 | 0     | 0      | kleiner LLOQ | #VALUE! | 2.75 | #VALUE! |
| Blank PEG    | T13 | G09 | 0     | 0      | kleiner LLOQ | #VALUE! | 2.75 | #VALUE! |
| Blank PEG    | T13 | G10 | 0     | 0      | kleiner LLOQ | #VALUE! | 2.75 | #VALUE! |
| Blank PEG    | T13 | G11 | 0     | 0      | kleiner LLOQ | #VALUE! | 2.75 | #VALUE! |
| Blank PEG    | T13 | G12 | 0     | 0      | kleiner LLOQ | #VALUE! | 2.75 | #VALUE! |
| 0            | T13 | H01 | 0     | 0      | kleiner LLOQ | #VALUE! | 1    | #VALUE! |
| 0            | T13 | H02 | 0     | 0      | kleiner LLOQ | #VALUE! | 1    | #VALUE! |
| 0            | T13 | H03 | 0     | 0      | kleiner LLOQ | #VALUE! | 1    | #VALUE! |
| 0            | T13 | H04 | 0     | 0      | kleiner LLOQ | #VALUE! | 1    | #VALUE! |
| 0            | T13 | H05 | 0     | 0      | kleiner LLOQ | #VALUE! | 1    | #VALUE! |
| 0            | T13 | H06 | 0     | 0      | kleiner LLOQ | #VALUE! | 1    | #VALUE! |
| Blank no PEG | T13 | H07 | 0     | 0      | kleiner LLOQ | #VALUE! | 2.75 | #VALUE! |
| Blank no PEG | T13 | H08 | 0     | 0      | kleiner LLOQ | #VALUE! | 2.75 | #VALUE! |
| Blank no PEG | T13 | H09 | 0     | 0      | kleiner LLOQ | #VALUE! | 2.75 | #VALUE! |
| Blank no PEG | T13 | H10 | 0     | 0      | kleiner LLOQ | #VALUE! | 2.75 | #VALUE! |
| Blank no PEG | T13 | H11 | 0     | 0      | kleiner LLOQ | #VALUE! | 2.75 | #VALUE! |
| Blank no PEG | T13 | H12 | 0     | 0      | kleiner LLOQ | #VALUE! | 2.75 | #VALUE! |
| 0            | T14 | A01 | 0     | 0      | kleiner LLOQ | #VALUE! | 1    | #VALUE! |
| 0            | T14 | A02 | 0     | 0      | kleiner LLOQ | #VALUE! | 1    | #VALUE! |
| 0            | T14 | A03 | 0     | 0      | kleiner LLOQ | #VALUE! | 1    | #VALUE! |
| 0            | T14 | A04 | 0     | 0      | kleiner LLOQ | #VALUE! | 1    | #VALUE! |
| T14HN1       | T14 | A05 | 0.308 | 0.257  | 0.257        | 0.011   | 2.75 | 0.029   |
| T14HN1       | T14 | A06 | 0.290 | 0.239  | 0.239        | 0.010   | 2.75 | 0.027   |
| T14HN2       | T14 | A07 | 0.352 | 0.301  | 0.301        | 0.013   | 2.75 | 0.035   |
| T14HN2       | T14 | A08 | 0.377 | 0.327  | 0.327        | 0.014   | 2.75 | 0.038   |
| T14HN3       | T14 | A09 | 0.386 | 0.335  | 0.335        | 0.014   | 2.75 | 0.039   |
| T14HN3       | T14 | A10 | 0.406 | 0.355  | 0.355        | 0.015   | 2.75 | 0.042   |
| T14HN4       | T14 | A11 | 0.362 | 0.311  | 0.311        | 0.013   | 2.75 | 0.036   |
| T14HN4       | T14 | A12 | 0.392 | 0.341  | 0.341        | 0.015   | 2.75 | 0.040   |
| 0            | T14 | B01 | 0.000 | -0.051 | kleiner LLOQ | #VALUE! | 1    | #VALUE! |
| 0            | T14 | B02 | 0.000 | -0.051 | kleiner LLOQ | #VALUE! | 1    | #VALUE! |
| 0            | T14 | B03 | 0.000 | -0.051 | kleiner LLOQ | #VALUE! | 1    | #VALUE! |
| 0            | T14 | B04 | 0.000 | -0.051 | kleiner LLOQ | #VALUE! | 1    | #VALUE! |
| T14HS11      | T14 | B05 | 0.183 | 0.132  | kleiner LLOQ | #VALUE! | 2.75 | #VALUE! |
| T14HS11      | T14 | B06 | 0.180 | 0.129  | kleiner LLOQ | #VALUE! | 2.75 | #VALUE! |
| T14HS12      | T14 | B07 | 0.174 | 0.124  | kleiner LLOQ | #VALUE! | 2.75 | #VALUE! |
| T14HS12      | T14 | B08 | 0.178 | 0.127  | kleiner LLOQ | #VALUE! | 2.75 | #VALUE! |
| T14HS13      | T14 | B09 | 0.170 | 0.119  | kleiner LLOQ | #VALUE! | 2.75 | #VALUE! |
| T14HS13      | T14 | B10 | 0.174 | 0.123  | kleiner LLOQ | #VALUE! | 2.75 | #VALUE! |
| T14HS14      | T14 | B11 | 0.187 | 0.136  | kleiner LLOQ | #VALUE! | 2.75 | #VALUE! |
| T14HS14      | T14 | B12 | 0.256 | 0.205  | 0.205        | 0.008   | 2.75 | 0.022   |
| 0            | T14 | C01 | 0.000 | -0.051 | kleiner LLOQ | #VALUE! | 1    | #VALUE! |

Plate: T14

|   | 1 | 2 | 3 | 4 | 5     | 6     | 7     | 8     | 9     | 10    | 11    | 12    |
|---|---|---|---|---|-------|-------|-------|-------|-------|-------|-------|-------|
| A |   |   |   |   | 0.308 | 0.290 | 0.352 | 0.377 | 0.386 | 0.406 | 0.362 | 0.392 |
| B |   |   |   |   | 0.183 | 0.180 | 0.174 | 0.178 | 0.170 | 0.174 | 0.187 | 0.256 |
| C |   |   |   |   | 0.667 | 0.663 | 0.572 | 0.566 | 0.541 | 0.553 | 0.416 | 0.389 |
| D |   |   |   |   |       |       |       |       |       |       |       |       |
| E |   |   |   |   |       |       |       |       |       |       |       |       |
| F |   |   |   |   |       |       |       |       |       |       |       |       |
| G |   |   |   |   |       |       | 0.041 | 0.048 | 0.048 | 0.048 | 0.048 | 0.047 |
| H |   |   |   |   |       |       | 0.044 | 0.045 | 0.046 | 0.048 | 0.046 | 0.048 |

Plattenbelegung

|   | 1 | 2 | 3 | 4 | 5       | 6       | 7       | 8       | 9       | 10      | 11      | 12      |
|---|---|---|---|---|---------|---------|---------|---------|---------|---------|---------|---------|
| A |   |   |   |   | T14HN1  | T14HN1  | T14HN2  | T14HN2  | T14HN3  | T14HN3  | T14HN4  | T14HN4  |
| B |   |   |   |   | T14HS11 | T14HS11 | T14HS12 | T14HS12 | T14HS13 | T14HS13 | T14HS14 | T14HS14 |
| C |   |   |   |   | T14HS21 | T14HS21 | T14HS22 | T14HS22 | T14HS23 | T14HS23 | T14HS24 | T14HS24 |
| D |   |   |   |   |         |         |         |         |         |         |         |         |
| E |   |   |   |   |         |         |         |         |         |         |         |         |

|              |     |     |       |        |              |         |      |         |   |  |  |  |  |  |              |              |              |              |              |
|--------------|-----|-----|-------|--------|--------------|---------|------|---------|---|--|--|--|--|--|--------------|--------------|--------------|--------------|--------------|
| 0            | T14 | C02 | 0.000 | -0.051 | kleiner LLOQ | #VALUE! | 1    | #VALUE! | F |  |  |  |  |  |              |              |              |              |              |
| 0            | T14 | C03 | 0.000 | -0.051 | kleiner LLOQ | #VALUE! | 1    | #VALUE! | G |  |  |  |  |  | Blank PEG    | Blank PEG    | Blank PEG    | Blank PEG    | Blank PEG    |
| 0            | T14 | C04 | 0.000 | -0.051 | kleiner LLOQ | #VALUE! | 1    | #VALUE! | H |  |  |  |  |  | Blank no PEG | Blank no PEG | Blank no PEG | Blank no PEG | Blank no PEG |
| T14HS21      | T14 | C05 | 0.667 | 0.616  | 0.616        | 0.028   | 2.75 | 0.076   |   |  |  |  |  |  |              |              |              |              |              |
| T14HS21      | T14 | C06 | 0.663 | 0.612  | 0.612        | 0.027   | 2.75 | 0.076   |   |  |  |  |  |  |              |              |              |              |              |
| T14HS22      | T14 | C07 | 0.572 | 0.521  | 0.521        | 0.023   | 2.75 | 0.064   |   |  |  |  |  |  |              |              |              |              |              |
| T14HS22      | T14 | C08 | 0.566 | 0.515  | 0.515        | 0.023   | 2.75 | 0.063   |   |  |  |  |  |  |              |              |              |              |              |
| T14HS23      | T14 | C09 | 0.541 | 0.490  | 0.490        | 0.022   | 2.75 | 0.060   |   |  |  |  |  |  |              |              |              |              |              |
| T14HS23      | T14 | C10 | 0.553 | 0.502  | 0.502        | 0.022   | 2.75 | 0.061   |   |  |  |  |  |  |              |              |              |              |              |
| T14HS24      | T14 | C11 | 0.416 | 0.365  | 0.365        | 0.016   | 2.75 | 0.043   |   |  |  |  |  |  |              |              |              |              |              |
| T14HS24      | T14 | C12 | 0.389 | 0.338  | 0.338        | 0.014   | 2.75 | 0.040   |   |  |  |  |  |  |              |              |              |              |              |
| 0            | T14 | D01 | 0.000 | -0.051 | kleiner LLOQ | #VALUE! | 1    | #VALUE! |   |  |  |  |  |  |              |              |              |              |              |
| 0            | T14 | D02 | 0.000 | -0.051 | kleiner LLOQ | #VALUE! | 1    | #VALUE! |   |  |  |  |  |  |              |              |              |              |              |
| 0            | T14 | D03 | 0     | 0      | kleiner LLOQ | #VALUE! | 1    | #VALUE! |   |  |  |  |  |  |              |              |              |              |              |
| 0            | T14 | D04 | 0     | 0      | kleiner LLOQ | #VALUE! | 1    | #VALUE! |   |  |  |  |  |  |              |              |              |              |              |
| 0            | T14 | D05 | 0     | 0      | kleiner LLOQ | #VALUE! | 1    | #VALUE! |   |  |  |  |  |  |              |              |              |              |              |
| 0            | T14 | D06 | 0     | 0      | kleiner LLOQ | #VALUE! | 1    | #VALUE! |   |  |  |  |  |  |              |              |              |              |              |
| 0            | T14 | D07 | 0     | 0      | kleiner LLOQ | #VALUE! | 1    | #VALUE! |   |  |  |  |  |  |              |              |              |              |              |
| 0            | T14 | D08 | 0     | 0      | kleiner LLOQ | #VALUE! | 1    | #VALUE! |   |  |  |  |  |  |              |              |              |              |              |
| 0            | T14 | D09 | 0     | 0      | kleiner LLOQ | #VALUE! | 1    | #VALUE! |   |  |  |  |  |  |              |              |              |              |              |
| 0            | T14 | D10 | 0     | 0      | kleiner LLOQ | #VALUE! | 1    | #VALUE! |   |  |  |  |  |  |              |              |              |              |              |
| 0            | T14 | D11 | 0     | 0      | kleiner LLOQ | #VALUE! | 1    | #VALUE! |   |  |  |  |  |  |              |              |              |              |              |
| 0            | T14 | D12 | 0     | 0      | kleiner LLOQ | #VALUE! | 1    | #VALUE! |   |  |  |  |  |  |              |              |              |              |              |
| 0            | T14 | E01 | 0     | 0      | kleiner LLOQ | #VALUE! | 1    | #VALUE! |   |  |  |  |  |  |              |              |              |              |              |
| 0            | T14 | E02 | 0     | 0      | kleiner LLOQ | #VALUE! | 1    | #VALUE! |   |  |  |  |  |  |              |              |              |              |              |
| 0            | T14 | E03 | 0     | 0      | kleiner LLOQ | #VALUE! | 1    | #VALUE! |   |  |  |  |  |  |              |              |              |              |              |
| 0            | T14 | E04 | 0     | 0      | kleiner LLOQ | #VALUE! | 1    | #VALUE! |   |  |  |  |  |  |              |              |              |              |              |
| 0            | T14 | E05 | 0     | 0      | kleiner LLOQ | #VALUE! | 1    | #VALUE! |   |  |  |  |  |  |              |              |              |              |              |
| 0            | T14 | E06 | 0     | 0      | kleiner LLOQ | #VALUE! | 1    | #VALUE! |   |  |  |  |  |  |              |              |              |              |              |
| 0            | T14 | E07 | 0     | 0      | kleiner LLOQ | #VALUE! | 1    | #VALUE! |   |  |  |  |  |  |              |              |              |              |              |
| 0            | T14 | E08 | 0     | 0      | kleiner LLOQ | #VALUE! | 1    | #VALUE! |   |  |  |  |  |  |              |              |              |              |              |
| 0            | T14 | E09 | 0     | 0      | kleiner LLOQ | #VALUE! | 1    | #VALUE! |   |  |  |  |  |  |              |              |              |              |              |
| 0            | T14 | E10 | 0     | 0      | kleiner LLOQ | #VALUE! | 1    | #VALUE! |   |  |  |  |  |  |              |              |              |              |              |
| 0            | T14 | E11 | 0     | 0      | kleiner LLOQ | #VALUE! | 1    | #VALUE! |   |  |  |  |  |  |              |              |              |              |              |
| 0            | T14 | E12 | 0     | 0      | kleiner LLOQ | #VALUE! | 1    | #VALUE! |   |  |  |  |  |  |              |              |              |              |              |
| 0            | T14 | F01 | 0     | 0      | kleiner LLOQ | #VALUE! | 1    | #VALUE! |   |  |  |  |  |  |              |              |              |              |              |
| 0            | T14 | F02 | 0     | 0      | kleiner LLOQ | #VALUE! | 1    | #VALUE! |   |  |  |  |  |  |              |              |              |              |              |
| 0            | T14 | F03 | 0     | 0      | kleiner LLOQ | #VALUE! | 1    | #VALUE! |   |  |  |  |  |  |              |              |              |              |              |
| 0            | T14 | F04 | 0     | 0      | kleiner LLOQ | #VALUE! | 1    | #VALUE! |   |  |  |  |  |  |              |              |              |              |              |
| 0            | T14 | F05 | 0     | 0      | kleiner LLOQ | #VALUE! | 1    | #VALUE! |   |  |  |  |  |  |              |              |              |              |              |
| 0            | T14 | F06 | 0     | 0      | kleiner LLOQ | #VALUE! | 1    | #VALUE! |   |  |  |  |  |  |              |              |              |              |              |
| 0            | T14 | F07 | 0     | 0      | kleiner LLOQ | #VALUE! | 1    | #VALUE! |   |  |  |  |  |  |              |              |              |              |              |
| 0            | T14 | F08 | 0     | 0      | kleiner LLOQ | #VALUE! | 1    | #VALUE! |   |  |  |  |  |  |              |              |              |              |              |
| 0            | T14 | F09 | 0     | 0      | kleiner LLOQ | #VALUE! | 1    | #VALUE! |   |  |  |  |  |  |              |              |              |              |              |
| 0            | T14 | F10 | 0     | 0      | kleiner LLOQ | #VALUE! | 1    | #VALUE! |   |  |  |  |  |  |              |              |              |              |              |
| 0            | T14 | F11 | 0     | 0      | kleiner LLOQ | #VALUE! | 1    | #VALUE! |   |  |  |  |  |  |              |              |              |              |              |
| 0            | T14 | F12 | 0     | 0      | kleiner LLOQ | #VALUE! | 1    | #VALUE! |   |  |  |  |  |  |              |              |              |              |              |
| 0            | T14 | G01 | 0     | 0      | kleiner LLOQ | #VALUE! | 1    | #VALUE! |   |  |  |  |  |  |              |              |              |              |              |
| 0            | T14 | G02 | 0     | 0      | kleiner LLOQ | #VALUE! | 1    | #VALUE! |   |  |  |  |  |  |              |              |              |              |              |
| 0            | T14 | G03 | 0     | 0      | kleiner LLOQ | #VALUE! | 1    | #VALUE! |   |  |  |  |  |  |              |              |              |              |              |
| 0            | T14 | G04 | 0     | 0      | kleiner LLOQ | #VALUE! | 1    | #VALUE! |   |  |  |  |  |  |              |              |              |              |              |
| 0            | T14 | G05 | 0     | 0      | kleiner LLOQ | #VALUE! | 1    | #VALUE! |   |  |  |  |  |  |              |              |              |              |              |
| 0            | T14 | G06 | 0     | 0      | kleiner LLOQ | #VALUE! | 1    | #VALUE! |   |  |  |  |  |  |              |              |              |              |              |
| Blank PEG    | T14 | G07 | 0     | 0      | kleiner LLOQ | #VALUE! | 1    | #VALUE! |   |  |  |  |  |  |              |              |              |              |              |
| Blank PEG    | T14 | G08 | 0     | 0      | kleiner LLOQ | #VALUE! | 1    | #VALUE! |   |  |  |  |  |  |              |              |              |              |              |
| Blank PEG    | T14 | G09 | 0     | 0      | kleiner LLOQ | #VALUE! | 1    | #VALUE! |   |  |  |  |  |  |              |              |              |              |              |
| Blank PEG    | T14 | G10 | 0     | 0      | kleiner LLOQ | #VALUE! | 1    | #VALUE! |   |  |  |  |  |  |              |              |              |              |              |
| Blank PEG    | T14 | G11 | 0     | 0      | kleiner LLOQ | #VALUE! | 1    | #VALUE! |   |  |  |  |  |  |              |              |              |              |              |
| Blank PEG    | T14 | G12 | 0     | 0      | kleiner LLOQ | #VALUE! | 1    | #VALUE! |   |  |  |  |  |  |              |              |              |              |              |
| 0            | T14 | H01 | 0     | 0      | kleiner LLOQ | #VALUE! | 1    | #VALUE! |   |  |  |  |  |  |              |              |              |              |              |
| 0            | T14 | H02 | 0     | 0      | kleiner LLOQ | #VALUE! | 1    | #VALUE! |   |  |  |  |  |  |              |              |              |              |              |
| 0            | T14 | H03 | 0     | 0      | kleiner LLOQ | #VALUE! | 1    | #VALUE! |   |  |  |  |  |  |              |              |              |              |              |
| 0            | T14 | H04 | 0     | 0      | kleiner LLOQ | #VALUE! | 1    | #VALUE! |   |  |  |  |  |  |              |              |              |              |              |
| 0            | T14 | H05 | 0     | 0      | kleiner LLOQ | #VALUE! | 1    | #VALUE! |   |  |  |  |  |  |              |              |              |              |              |
| 0            | T14 | H06 | 0     | 0      | kleiner LLOQ | #VALUE! | 1    | #VALUE! |   |  |  |  |  |  |              |              |              |              |              |
| Blank no PEG | T14 | H07 | 0     | 0      | kleiner LLOQ | #VALUE! | 1    | #VALUE! |   |  |  |  |  |  |              |              |              |              |              |
| Blank no PEG | T14 | H08 | 0     | 0      | kleiner LLOQ | #VALUE! | 1    | #VALUE! |   |  |  |  |  |  |              |              |              |              |              |
| Blank no PEG | T14 | H09 | 0     | 0      | kleiner LLOQ | #VALUE! | 1    | #VALUE! |   |  |  |  |  |  |              |              |              |              |              |
| Blank no PEG | T14 | H10 | 0     | 0      | kleiner LLOQ | #VALUE! | 1    | #VALUE! |   |  |  |  |  |  |              |              |              |              |              |
| Blank no PEG | T14 | H11 | 0     | 0      | kleiner LLOQ | #VALUE! | 1    | #VALUE! |   |  |  |  |  |  |              |              |              |              |              |
| Blank no PEG | T14 | H12 | 0     | 0      | kleiner LLOQ | #VALUE! | 1    | #VALUE! |   |  |  |  |  |  |              |              |              |              |              |

Comment:

Date Operator

Date Control

|                    |              |                            |                         |                         |                              |
|--------------------|--------------|----------------------------|-------------------------|-------------------------|------------------------------|
| Project number     | F-120        | Apparatus                  | Wallac Victor           | Operator                | IsBa                         |
| GLP Study (Number) | n.a.         | Protocol (Instrument meth) | LDH test 2016           | Date of preparation     | 19-04-18                     |
| hot substance      | isotope      | n.a.                       | File name (results)     | IsBa_180419/20_LDH_full | Date of measurement          |
|                    | name         | n.a.                       | Kind of well plate      | 96 well                 | shaking time [min]           |
| cold substance     | ACB-ID       | n.a.                       | sample volume [µL]      | 100                     | stirring rate (Target) [rpm] |
|                    | Batch number | n.a.                       | Cocktail volume [µL]    | 175                     | Kind of measurement          |
| n.a.               | name         | LDH                        | ACB-ID of cocktail      |                         | Wave length [nm]             |
|                    | ACB-ID       | L23982R                    | Matrix                  | DMEM (from powder)+PE   | Remarks                      |
| n.a.               | Batch number | SLBK6345V                  | Blank description       | DMEM/PEG, H2O           | Remarks                      |
| n.a.               |              |                            | Pipettes (No. / volume) | 50-200µl                | Remarks                      |
| n.a.               |              |                            | Pipettes (No. / volume) | n.a.                    | Remarks                      |
| n.a.               |              |                            |                         |                         | n.a.                         |

Messdaten (diese Tabelle in Bericht übernehmen)

| Sample name * | concentration (theor.) * | measured data | measured data | measured data | mean measured | SD   | RSD  | Blank * | measured data after * | concentration (calc.) * | Deviation * | Residuen |
|---------------|--------------------------|---------------|---------------|---------------|---------------|------|------|---------|-----------------------|-------------------------|-------------|----------|
|               | [µg/mL]                  | [AU]          | [AU]          | [AU]          | [AU]          | [AU] | [%]  | [AU]    | Blank subtraction     | [µg/mL]                 | [%]         |          |
| KLP1          | 0.148                    | 1.579         | 1.652         | 1.627         | 1.62          | 0.03 | 1.87 | 0.047   | 1.568                 | 0.148                   | -0.24       | 0.00     |
| KLP2          | 0.114                    | 1.357         | 1.443         | 1.372         | 1.39          | 0.04 | 2.70 | 0.054   | 1.340                 | 0.110                   | -3.40       | 0.00     |
| KLP3          | 0.074                    | 1.272         | 1.193         | 1.228         | 1.23          | 0.03 | 2.63 | 0.051   | 1.180                 | 0.084                   | 13.04       | 0.01     |
| KLP4          | 0.041                    | 0.959         | 0.972         | 0.883         | 0.94          | 0.04 | 4.19 | 0.051   | 0.887                 | 0.035                   | -13.32      | -0.01    |
| KLP5          |                          |               |               |               |               |      |      | 0.052   |                       |                         |             |          |
| KLP6          |                          |               |               |               |               |      |      | 0.051   |                       |                         |             |          |
| KLP7          |                          |               |               |               |               |      |      |         |                       |                         |             |          |
| KLP8          |                          |               |               |               |               |      |      |         |                       |                         |             |          |

Statistical data

|                                              |                                          |                     |             |
|----------------------------------------------|------------------------------------------|---------------------|-------------|
| Geradensteigung                              | Slope                                    | m                   | 6.05        |
| Y-Achsenabschnitt                            | Y-intercept                              | b                   | 0.67        |
| Standardabw. Geradensteigung                 | SD-Slope                                 | S <sub>m</sub>      | 0.620291227 |
| Standardabw. Achsenabschnittes               | SD-Y-Intercept                           | S <sub>b</sub>      | 0.063894294 |
| Anzahl Messpunkte                            | number of measuring points               | n                   | 4           |
| Quadratsumme                                 | sum of squares                           | Q <sub>xx</sub>     | 0.006578604 |
| Bereichsmittle                               |                                          | f                   | 0.094336926 |
| Freiheitsgrade                               | degree of freedom                        | f                   | 2           |
| Student-t-Faktor für (P = 95 %; f = n-2)     | Student-t-factor for (P = 95 %; f = n-2) | t                   | 4.303       |
| Vertrauensbereich Steig. (95 %) Obergrenze   |                                          | m + VB <sub>m</sub> | 8.722319627 |
| Vertrauensbereich Steig. (95 %) Untergrenze  |                                          | m - VB <sub>m</sub> | 3.384093228 |
| Vertrauensbereich Achsenabschnitt (95 %) Og. |                                          | b + VB <sub>b</sub> | 0.946914615 |
| Vertrauensbereich Achsenabschnitt (95 %) Ug. |                                          | b - VB <sub>b</sub> | 0.398761518 |
| Korrelationskoeffizient                      | correlation coefficient                  | r                   | 0.9897      |
| Bestimmtheitsmaß                             | determination coefficient                | r <sup>2</sup>      | 0.9794      |
| Reststandardabweichung                       |                                          | S <sub>0</sub>      | 0.050310948 |
| Summe Restquadrat                            |                                          | sd                  | 2.895683345 |
| Verfahrensstandardabw.                       |                                          | S <sub>0p</sub>     | 0.008311454 |
| Rel. Verfahrensstandardabw. %                |                                          | V <sub>0p</sub>     | 8.810393374 |

|                          |       |
|--------------------------|-------|
| mean Blank               | 0     |
| SD Blank                 | 0.00  |
| RSD Blank                | 3.79  |
| x <sup>2</sup> SD (LLOQ) | 0     |
| x <sup>2</sup> SD (LOD)  | 0     |
| LLOQ (AU)                | 0     |
| LOD (AU)                 | 0     |
| LLOQ                     | 1.568 |
| LLOQ (Lin)               | 0.887 |

Evaluation / Comment

LDH linearity valid with 7 standards, split in lin high and lin low, each with 4 standards and KLP4 common standard for both. R<sup>2</sup> 0,9981, deviations for both between -13.34% and +13.04%

Date \_\_\_\_\_ Operator \_\_\_\_\_ Date \_\_\_\_\_ Control \_\_\_\_\_



Figure 1 Linearity

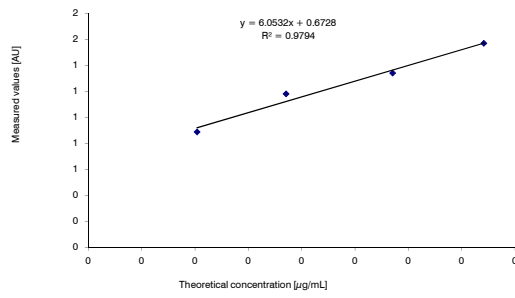

Figure 2 Method validation Residuen Plot

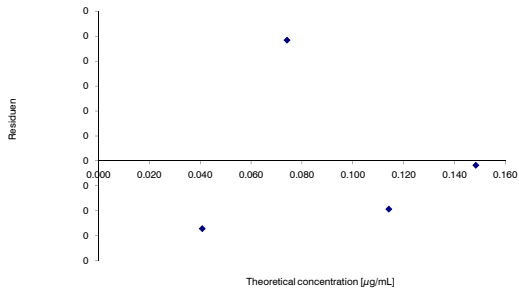

Evaluation / Comment

lin passed

Date

Operator

Date

Control

| Sample name | Plate | Position | [AU]  | [AU]-Blank | Rating       | [µg/mL] | Dilution factor | [µg/mL] |
|-------------|-------|----------|-------|------------|--------------|---------|-----------------|---------|
| 0           | T12   | A01      | 0     | 0          | kleiner LLOQ | #VALUE! | 1               | #VALUE! |
| 0           | T12   | A02      | 0     | 0          | kleiner LLOQ | #VALUE! | 1               | #VALUE! |
| 0           | T12   | A03      | 0     | 0          | kleiner LLOQ | #VALUE! | 1               | #VALUE! |
| 0           | T12   | A04      | 0     | 0          | kleiner LLOQ | #VALUE! | 1               | #VALUE! |
| 0           | T12   | A05      | 0.000 | -0.051     | kleiner LLOQ | #VALUE! | 1               | #VALUE! |
| 0           | T12   | A06      | 0.000 | -0.051     | kleiner LLOQ | #VALUE! | 1               | #VALUE! |
| 0           | T12   | A07      | 0     | 0          | kleiner LLOQ | #VALUE! | 1               | #VALUE! |
| 0           | T12   | A08      | 0     | 0          | kleiner LLOQ | #VALUE! | 1               | #VALUE! |
| 0           | T12   | A09      | 0.000 | -0.051     | kleiner LLOQ | #VALUE! | 1               | #VALUE! |
| 0           | T12   | A10      | 0.000 | -0.051     | kleiner LLOQ | #VALUE! | 1               | #VALUE! |
| 0           | T12   | A11      | 0     | 0          | kleiner LLOQ | #VALUE! | 1               | #VALUE! |
| 0           | T12   | A12      | 0     | 0          | kleiner LLOQ | #VALUE! | 1               | #VALUE! |
| 0           | T12   | B01      | 0     | 0          | kleiner LLOQ | #VALUE! | 1               | #VALUE! |
| 0           | T12   | B02      | 0     | 0          | kleiner LLOQ | #VALUE! | 1               | #VALUE! |
| 0           | T12   | B03      | 0     | 0          | kleiner LLOQ | #VALUE! | 1               | #VALUE! |
| 0           | T12   | B04      | 0     | 0          | kleiner LLOQ | #VALUE! | 1               | #VALUE! |
| 0           | T12   | B05      | 0     | 0          | kleiner LLOQ | #VALUE! | 1               | #VALUE! |
| 0           | T12   | B06      | 0.000 | -0.051     | kleiner LLOQ | #VALUE! | 1               | #VALUE! |
| 0           | T12   | B07      | 0.000 | -0.051     | kleiner LLOQ | #VALUE! | 1               | #VALUE! |
| 0           | T12   | B08      | 0.000 | -0.051     | kleiner LLOQ | #VALUE! | 1               | #VALUE! |
| 0           | T12   | B09      | 0     | 0          | kleiner LLOQ | #VALUE! | 1               | #VALUE! |
| 0           | T12   | B10      | 0     | 0          | kleiner LLOQ | #VALUE! | 1               | #VALUE! |
| 0           | T12   | B11      | 0     | 0          | kleiner LLOQ | #VALUE! | 1               | #VALUE! |
| 0           | T12   | B12      | 0     | 0          | kleiner LLOQ | #VALUE! | 1               | #VALUE! |
| 0           | T12   | C01      | 0     | 0          | kleiner LLOQ | #VALUE! | 1               | #VALUE! |
| 0           | T12   | C02      | 0     | 0          | kleiner LLOQ | #VALUE! | 1               | #VALUE! |
| 0           | T12   | C03      | 0     | 0          | kleiner LLOQ | #VALUE! | 1               | #VALUE! |
| 0           | T12   | C04      | 0     | 0          | kleiner LLOQ | #VALUE! | 1               | #VALUE! |
| 0           | T12   | C05      | 0.000 | -0.051     | kleiner LLOQ | #VALUE! | 1               | #VALUE! |
| 0           | T12   | C06      | 0.000 | -0.051     | kleiner LLOQ | #VALUE! | 1               | #VALUE! |
| 0           | T12   | C07      | 0.000 | -0.051     | kleiner LLOQ | #VALUE! | 1               | #VALUE! |
| 0           | T12   | C08      | 0.000 | -0.051     | kleiner LLOQ | #VALUE! | 1               | #VALUE! |
| 0           | T12   | C09      | 0.000 | -0.051     | kleiner LLOQ | #VALUE! | 1               | #VALUE! |
| 0           | T12   | C10      | 0.000 | -0.051     | kleiner LLOQ | #VALUE! | 1               | #VALUE! |
| 0           | T12   | C11      | 0     | 0          | kleiner LLOQ | #VALUE! | 1               | #VALUE! |
| 0           | T12   | C12      | 0     | 0          | kleiner LLOQ | #VALUE! | 1               | #VALUE! |
| 0           | T12   | D01      | 0     | 0          | kleiner LLOQ | #VALUE! | 1               | #VALUE! |
| 0           | T12   | D02      | 0     | 0          | kleiner LLOQ | #VALUE! | 1               | #VALUE! |
| 0           | T12   | D03      | 0     | 0          | kleiner LLOQ | #VALUE! | 1               | #VALUE! |
| 0           | T12   | D04      | 0     | 0          | kleiner LLOQ | #VALUE! | 1               | #VALUE! |
| 0           | T12   | D05      | 0     | 0          | kleiner LLOQ | #VALUE! | 1               | #VALUE! |
| 0           | T12   | D06      | 0     | 0          | kleiner LLOQ | #VALUE! | 1               | #VALUE! |
| 0           | T12   | D07      | 0     | 0          | kleiner LLOQ | #VALUE! | 1               | #VALUE! |
| 0           | T12   | D08      | 0     | 0          | kleiner LLOQ | #VALUE! | 1               | #VALUE! |
| 0           | T12   | D09      | 0     | 0          | kleiner LLOQ | #VALUE! | 1               | #VALUE! |
| 0           | T12   | D10      | 0     | 0          | kleiner LLOQ | #VALUE! | 1               | #VALUE! |
| 0           | T12   | D11      | 0     | 0          | kleiner LLOQ | #VALUE! | 1               | #VALUE! |
| 0           | T12   | D12      | 0     | 0          | kleiner LLOQ | #VALUE! | 1               | #VALUE! |

Plate: T12

|   |   |   |   |   |   |   |   |   |   |    |    |    |
|---|---|---|---|---|---|---|---|---|---|----|----|----|
|   | 1 | 2 | 3 | 4 | 5 | 6 | 7 | 8 | 9 | 10 | 11 | 12 |
| A |   |   |   |   |   |   |   |   |   |    |    |    |
| B |   |   |   |   |   |   |   |   |   |    |    |    |
| C |   |   |   |   |   |   |   |   |   |    |    |    |
| D |   |   |   |   |   |   |   |   |   |    |    |    |
| E |   |   |   |   |   |   |   |   |   |    |    |    |
| F |   |   |   |   |   |   |   |   |   |    |    |    |
| G |   |   |   |   |   |   |   |   |   |    |    |    |
| H |   |   |   |   |   |   |   |   |   |    |    |    |

Plattenbelegung

|   |   |   |   |   |   |   |   |   |   |    |    |    |
|---|---|---|---|---|---|---|---|---|---|----|----|----|
|   | 1 | 2 | 3 | 4 | 5 | 6 | 7 | 8 | 9 | 10 | 11 | 12 |
| A |   |   |   |   |   |   |   |   |   |    |    |    |
| B |   |   |   |   |   |   |   |   |   |    |    |    |
| C |   |   |   |   |   |   |   |   |   |    |    |    |
| D |   |   |   |   |   |   |   |   |   |    |    |    |
| E |   |   |   |   |   |   |   |   |   |    |    |    |
| F |   |   |   |   |   |   |   |   |   |    |    |    |
| G |   |   |   |   |   |   |   |   |   |    |    |    |
| H |   |   |   |   |   |   |   |   |   |    |    |    |

Comment:  
alle Messwerte bei lin low

Samples aufgeteilt in lin high und low;niedriger konzentrierte Samples bei lin low zu finden.

Date Operator Date Control

|              |     |     |       |        |              |         |      |         |
|--------------|-----|-----|-------|--------|--------------|---------|------|---------|
| 0            | T12 | E01 | 0     | 0      | kleiner LLOQ | #VALUE! | 1    | #VALUE! |
| 0            | T12 | E02 | 0     | 0      | kleiner LLOQ | #VALUE! | 1    | #VALUE! |
| 0            | T12 | E03 | 0     | 0      | kleiner LLOQ | #VALUE! | 1    | #VALUE! |
| 0            | T12 | E04 | 0     | 0      | kleiner LLOQ | #VALUE! | 1    | #VALUE! |
| 0            | T12 | E05 | 0     | 0      | kleiner LLOQ | #VALUE! | 1    | #VALUE! |
| 0            | T12 | E06 | 0     | 0      | kleiner LLOQ | #VALUE! | 1    | #VALUE! |
| 0            | T12 | E07 | 0     | 0      | kleiner LLOQ | #VALUE! | 1    | #VALUE! |
| 0            | T12 | E08 | 0     | 0      | kleiner LLOQ | #VALUE! | 1    | #VALUE! |
| 0            | T12 | E09 | 0     | 0      | kleiner LLOQ | #VALUE! | 1    | #VALUE! |
| 0            | T12 | E10 | 0     | 0      | kleiner LLOQ | #VALUE! | 1    | #VALUE! |
| 0            | T12 | E11 | 0     | 0      | kleiner LLOQ | #VALUE! | 1    | #VALUE! |
| 0            | T12 | E12 | 0     | 0      | kleiner LLOQ | #VALUE! | 1    | #VALUE! |
| 0            | T12 | F01 | 0     | 0      | kleiner LLOQ | #VALUE! | 1    | #VALUE! |
| 0            | T12 | F02 | 0     | 0      | kleiner LLOQ | #VALUE! | 1    | #VALUE! |
| 0            | T12 | F03 | 0     | 0      | kleiner LLOQ | #VALUE! | 1    | #VALUE! |
| 0            | T12 | F04 | 0     | 0      | kleiner LLOQ | #VALUE! | 1    | #VALUE! |
| 0            | T12 | F05 | 0     | 0      | kleiner LLOQ | #VALUE! | 1    | #VALUE! |
| 0            | T12 | F06 | 0     | 0      | kleiner LLOQ | #VALUE! | 1    | #VALUE! |
| 0            | T12 | F07 | 0     | 0      | kleiner LLOQ | #VALUE! | 1    | #VALUE! |
| 0            | T12 | F08 | 0     | 0      | kleiner LLOQ | #VALUE! | 1    | #VALUE! |
| 0            | T12 | F09 | 0     | 0      | kleiner LLOQ | #VALUE! | 1    | #VALUE! |
| 0            | T12 | F10 | 0     | 0      | kleiner LLOQ | #VALUE! | 1    | #VALUE! |
| 0            | T12 | F11 | 0     | 0      | kleiner LLOQ | #VALUE! | 1    | #VALUE! |
| 0            | T12 | F12 | 0     | 0      | kleiner LLOQ | #VALUE! | 1    | #VALUE! |
| 0            | T12 | G01 | 0     | 0      | kleiner LLOQ | #VALUE! | 1    | #VALUE! |
| 0            | T12 | G02 | 0     | 0      | kleiner LLOQ | #VALUE! | 1    | #VALUE! |
| 0            | T12 | G03 | 0     | 0      | kleiner LLOQ | #VALUE! | 1    | #VALUE! |
| 0            | T12 | G04 | 0     | 0      | kleiner LLOQ | #VALUE! | 1    | #VALUE! |
| 0            | T12 | G05 | 0     | 0      | kleiner LLOQ | #VALUE! | 1    | #VALUE! |
| 0            | T12 | G06 | 0     | 0      | kleiner LLOQ | #VALUE! | 1    | #VALUE! |
| Blank PEG    | T12 | G07 | 0.000 | -0.051 | kleiner LLOQ | #VALUE! | 2.75 | #VALUE! |
| Blank PEG    | T12 | G08 | 0.000 | -0.051 | kleiner LLOQ | #VALUE! | 2.75 | #VALUE! |
| Blank PEG    | T12 | G09 | 0.000 | -0.051 | kleiner LLOQ | #VALUE! | 2.75 | #VALUE! |
| Blank PEG    | T12 | G10 | 0.000 | -0.051 | kleiner LLOQ | #VALUE! | 2.75 | #VALUE! |
| Blank PEG    | T12 | G11 | 0.000 | -0.051 | kleiner LLOQ | #VALUE! | 2.75 | #VALUE! |
| Blank PEG    | T12 | G12 | 0.000 | -0.051 | kleiner LLOQ | #VALUE! | 2.75 | #VALUE! |
| 0            | T12 | H01 | 0     | 0      | kleiner LLOQ | #VALUE! | 1    | #VALUE! |
| 0            | T12 | H02 | 0     | 0      | kleiner LLOQ | #VALUE! | 1    | #VALUE! |
| 0            | T12 | H03 | 0     | 0      | kleiner LLOQ | #VALUE! | 1    | #VALUE! |
| 0            | T12 | H04 | 0     | 0      | kleiner LLOQ | #VALUE! | 1    | #VALUE! |
| 0            | T12 | H05 | 0     | 0      | kleiner LLOQ | #VALUE! | 1    | #VALUE! |
| 0            | T12 | H06 | 0     | 0      | kleiner LLOQ | #VALUE! | 1    | #VALUE! |
| Blank no PEG | T12 | H07 | 0.000 | -0.051 | kleiner LLOQ | #VALUE! | 2.75 | #VALUE! |
| Blank no PEG | T12 | H08 | 0.000 | -0.051 | kleiner LLOQ | #VALUE! | 2.75 | #VALUE! |
| Blank no PEG | T12 | H09 | 0.000 | -0.051 | kleiner LLOQ | #VALUE! | 2.75 | #VALUE! |
| Blank no PEG | T12 | H10 | 0.000 | -0.051 | kleiner LLOQ | #VALUE! | 2.75 | #VALUE! |
| Blank no PEG | T12 | H11 | 0.000 | -0.051 | kleiner LLOQ | #VALUE! | 2.75 | #VALUE! |
| Blank no PEG | T12 | H12 | 0.000 | -0.051 | kleiner LLOQ | #VALUE! | 2.75 | #VALUE! |

|   |   |     |   |              |         |    |         |
|---|---|-----|---|--------------|---------|----|---------|
| 0 | B | A01 | 0 | kleiner LLOQ | #VALUE! | 2  | #VALUE! |
| 0 | B | A02 | 0 | kleiner LLOQ | #VALUE! | 3  | #VALUE! |
| 0 | B | A03 | 0 | kleiner LLOQ | #VALUE! | 4  | #VALUE! |
| 0 | B | A04 | 0 | kleiner LLOQ | #VALUE! | 5  | #VALUE! |
| 0 | B | A05 | 0 | kleiner LLOQ | #VALUE! | 6  | #VALUE! |
| 0 | B | A06 | 0 | kleiner LLOQ | #VALUE! | 7  | #VALUE! |
| 0 | B | A07 | 0 | kleiner LLOQ | #VALUE! | 8  | #VALUE! |
| 0 | B | A08 | 0 | kleiner LLOQ | #VALUE! | 9  | #VALUE! |
| 0 | B | A09 | 0 | kleiner LLOQ | #VALUE! | 10 | #VALUE! |
| 0 | B | A10 | 0 | kleiner LLOQ | #VALUE! | 11 | #VALUE! |
| 0 | B | A11 | 0 | kleiner LLOQ | #VALUE! | 12 | #VALUE! |
| 0 | B | A12 | 0 | kleiner LLOQ | #VALUE! | 13 | #VALUE! |
| 0 | B | B01 | 0 | kleiner LLOQ | #VALUE! | 14 | #VALUE! |
| 0 | B | B02 | 0 | kleiner LLOQ | #VALUE! | 15 | #VALUE! |
| 0 | B | B03 | 0 | kleiner LLOQ | #VALUE! | 16 | #VALUE! |
| 0 | B | B04 | 0 | kleiner LLOQ | #VALUE! | 17 | #VALUE! |
| 0 | B | B05 | 0 | kleiner LLOQ | #VALUE! | 18 | #VALUE! |
| 0 | B | B06 | 0 | kleiner LLOQ | #VALUE! | 19 | #VALUE! |
| 0 | B | B07 | 0 | kleiner LLOQ | #VALUE! | 20 | #VALUE! |
| 0 | B | B08 | 0 | kleiner LLOQ | #VALUE! | 21 | #VALUE! |
| 0 | B | B09 | 0 | kleiner LLOQ | #VALUE! | 22 | #VALUE! |
| 0 | B | B10 | 0 | kleiner LLOQ | #VALUE! | 23 | #VALUE! |
| 0 | B | B11 | 0 | kleiner LLOQ | #VALUE! | 24 | #VALUE! |
| 0 | B | B12 | 0 | kleiner LLOQ | #VALUE! | 25 | #VALUE! |
| 0 | B | C01 | 0 | kleiner LLOQ | #VALUE! | 26 | #VALUE! |
| 0 | B | C02 | 0 | kleiner LLOQ | #VALUE! | 27 | #VALUE! |
| 0 | B | C03 | 0 | kleiner LLOQ | #VALUE! | 28 | #VALUE! |
| 0 | B | C04 | 0 | kleiner LLOQ | #VALUE! | 29 | #VALUE! |
| 0 | B | C05 | 0 | kleiner LLOQ | #VALUE! | 30 | #VALUE! |
| 0 | B | C06 | 0 | kleiner LLOQ | #VALUE! | 31 | #VALUE! |
| 0 | B | C07 | 0 | kleiner LLOQ | #VALUE! | 32 | #VALUE! |
| 0 | B | C08 | 0 | kleiner LLOQ | #VALUE! | 33 | #VALUE! |
| 0 | B | C09 | 0 | kleiner LLOQ | #VALUE! | 34 | #VALUE! |
| 0 | B | C10 | 0 | kleiner LLOQ | #VALUE! | 35 | #VALUE! |
| 0 | B | C11 | 0 | kleiner LLOQ | #VALUE! | 36 | #VALUE! |
| 0 | B | C12 | 0 | kleiner LLOQ | #VALUE! | 37 | #VALUE! |
| 0 | B | D01 | 0 | kleiner LLOQ | #VALUE! | 38 | #VALUE! |
| 0 | B | D02 | 0 | kleiner LLOQ | #VALUE! | 39 | #VALUE! |
| 0 | B | D03 | 0 | kleiner LLOQ | #VALUE! | 40 | #VALUE! |
| 0 | B | D04 | 0 | kleiner LLOQ | #VALUE! | 41 | #VALUE! |
| 0 | B | D05 | 0 | kleiner LLOQ | #VALUE! | 42 | #VALUE! |
| 0 | B | D06 | 0 | kleiner LLOQ | #VALUE! | 43 | #VALUE! |
| 0 | B | D07 | 0 | kleiner LLOQ | #VALUE! | 44 | #VALUE! |
| 0 | B | D08 | 0 | kleiner LLOQ | #VALUE! | 45 | #VALUE! |
| 0 | B | D09 | 0 | kleiner LLOQ | #VALUE! | 46 | #VALUE! |
| 0 | B | D10 | 0 | kleiner LLOQ | #VALUE! | 47 | #VALUE! |
| 0 | B | D11 | 0 | kleiner LLOQ | #VALUE! | 48 | #VALUE! |
| 0 | B | D12 | 0 | kleiner LLOQ | #VALUE! | 49 | #VALUE! |

Plate: **B**

|   |   |   |   |   |   |   |   |   |   |    |    |    |
|---|---|---|---|---|---|---|---|---|---|----|----|----|
|   | 1 | 2 | 3 | 4 | 5 | 6 | 7 | 8 | 9 | 10 | 11 | 12 |
| A |   |   |   |   |   |   |   |   |   |    |    |    |
| B |   |   |   |   |   |   |   |   |   |    |    |    |
| C |   |   |   |   |   |   |   |   |   |    |    |    |
| D |   |   |   |   |   |   |   |   |   |    |    |    |
| E |   |   |   |   |   |   |   |   |   |    |    |    |
| F |   |   |   |   |   |   |   |   |   |    |    |    |
| G |   |   |   |   |   |   |   |   |   |    |    |    |
| H |   |   |   |   |   |   |   |   |   |    |    |    |

Plattenbelegung

|   |   |   |   |   |   |   |   |   |   |    |    |    |
|---|---|---|---|---|---|---|---|---|---|----|----|----|
|   | 1 | 2 | 3 | 4 | 5 | 6 | 7 | 8 | 9 | 10 | 11 | 12 |
| A |   |   |   |   |   |   |   |   |   |    |    |    |
| B |   |   |   |   |   |   |   |   |   |    |    |    |
| C |   |   |   |   |   |   |   |   |   |    |    |    |
| D |   |   |   |   |   |   |   |   |   |    |    |    |
| E |   |   |   |   |   |   |   |   |   |    |    |    |
| F |   |   |   |   |   |   |   |   |   |    |    |    |
| G |   |   |   |   |   |   |   |   |   |    |    |    |
| H |   |   |   |   |   |   |   |   |   |    |    |    |

Comment:

Date \_\_\_\_\_ Operator \_\_\_\_\_

Date \_\_\_\_\_ Control \_\_\_\_\_

|   |   |     |   |   |              |         |    |         |
|---|---|-----|---|---|--------------|---------|----|---------|
| 0 | B | E01 | 0 | 0 | kleiner LLOQ | #VALUE! | 50 | #VALUE! |
| 0 | B | E02 | 0 | 0 | kleiner LLOQ | #VALUE! | 51 | #VALUE! |
| 0 | B | E03 | 0 | 0 | kleiner LLOQ | #VALUE! | 52 | #VALUE! |
| 0 | B | E04 | 0 | 0 | kleiner LLOQ | #VALUE! | 53 | #VALUE! |
| 0 | B | E05 | 0 | 0 | kleiner LLOQ | #VALUE! | 54 | #VALUE! |
| 0 | B | E06 | 0 | 0 | kleiner LLOQ | #VALUE! | 55 | #VALUE! |
| 0 | B | E07 | 0 | 0 | kleiner LLOQ | #VALUE! | 56 | #VALUE! |
| 0 | B | E08 | 0 | 0 | kleiner LLOQ | #VALUE! | 57 | #VALUE! |
| 0 | B | E09 | 0 | 0 | kleiner LLOQ | #VALUE! | 58 | #VALUE! |
| 0 | B | E10 | 0 | 0 | kleiner LLOQ | #VALUE! | 59 | #VALUE! |
| 0 | B | E11 | 0 | 0 | kleiner LLOQ | #VALUE! | 60 | #VALUE! |
| 0 | B | E12 | 0 | 0 | kleiner LLOQ | #VALUE! | 61 | #VALUE! |
| 0 | B | F01 | 0 | 0 | kleiner LLOQ | #VALUE! | 62 | #VALUE! |
| 0 | B | F02 | 0 | 0 | kleiner LLOQ | #VALUE! | 63 | #VALUE! |
| 0 | B | F03 | 0 | 0 | kleiner LLOQ | #VALUE! | 64 | #VALUE! |
| 0 | B | F04 | 0 | 0 | kleiner LLOQ | #VALUE! | 65 | #VALUE! |
| 0 | B | F05 | 0 | 0 | kleiner LLOQ | #VALUE! | 66 | #VALUE! |
| 0 | B | F06 | 0 | 0 | kleiner LLOQ | #VALUE! | 67 | #VALUE! |
| 0 | B | F07 | 0 | 0 | kleiner LLOQ | #VALUE! | 68 | #VALUE! |
| 0 | B | F08 | 0 | 0 | kleiner LLOQ | #VALUE! | 69 | #VALUE! |
| 0 | B | F09 | 0 | 0 | kleiner LLOQ | #VALUE! | 70 | #VALUE! |
| 0 | B | F10 | 0 | 0 | kleiner LLOQ | #VALUE! | 71 | #VALUE! |
| 0 | B | F11 | 0 | 0 | kleiner LLOQ | #VALUE! | 72 | #VALUE! |
| 0 | B | F12 | 0 | 0 | kleiner LLOQ | #VALUE! | 73 | #VALUE! |
| 0 | B | G01 | 0 | 0 | kleiner LLOQ | #VALUE! | 74 | #VALUE! |
| 0 | B | G02 | 0 | 0 | kleiner LLOQ | #VALUE! | 75 | #VALUE! |
| 0 | B | G03 | 0 | 0 | kleiner LLOQ | #VALUE! | 76 | #VALUE! |
| 0 | B | G04 | 0 | 0 | kleiner LLOQ | #VALUE! | 77 | #VALUE! |
| 0 | B | G05 | 0 | 0 | kleiner LLOQ | #VALUE! | 78 | #VALUE! |
| 0 | B | G06 | 0 | 0 | kleiner LLOQ | #VALUE! | 79 | #VALUE! |
| 0 | B | G07 | 0 | 0 | kleiner LLOQ | #VALUE! | 80 | #VALUE! |
| 0 | B | G08 | 0 | 0 | kleiner LLOQ | #VALUE! | 81 | #VALUE! |
| 0 | B | G09 | 0 | 0 | kleiner LLOQ | #VALUE! | 82 | #VALUE! |
| 0 | B | G10 | 0 | 0 | kleiner LLOQ | #VALUE! | 83 | #VALUE! |
| 0 | B | G11 | 0 | 0 | kleiner LLOQ | #VALUE! | 84 | #VALUE! |
| 0 | B | G12 | 0 | 0 | kleiner LLOQ | #VALUE! | 85 | #VALUE! |
| 0 | B | H01 | 0 | 0 | kleiner LLOQ | #VALUE! | 86 | #VALUE! |
| 0 | B | H02 | 0 | 0 | kleiner LLOQ | #VALUE! | 87 | #VALUE! |
| 0 | B | H03 | 0 | 0 | kleiner LLOQ | #VALUE! | 88 | #VALUE! |
| 0 | B | H04 | 0 | 0 | kleiner LLOQ | #VALUE! | 89 | #VALUE! |
| 0 | B | H05 | 0 | 0 | kleiner LLOQ | #VALUE! | 90 | #VALUE! |
| 0 | B | H06 | 0 | 0 | kleiner LLOQ | #VALUE! | 91 | #VALUE! |
| 0 | B | H07 | 0 | 0 | kleiner LLOQ | #VALUE! | 92 | #VALUE! |
| 0 | B | H08 | 0 | 0 | kleiner LLOQ | #VALUE! | 93 | #VALUE! |
| 0 | B | H09 | 0 | 0 | kleiner LLOQ | #VALUE! | 94 | #VALUE! |
| 0 | B | H10 | 0 | 0 | kleiner LLOQ | #VALUE! | 95 | #VALUE! |
| 0 | B | H11 | 0 | 0 | kleiner LLOQ | #VALUE! | 96 | #VALUE! |
| 0 | B | H12 | 0 | 0 | kleiner LLOQ | #VALUE! | 97 | #VALUE! |

|       |       |       |       |       |       |       |       |       |       |       |       |
|-------|-------|-------|-------|-------|-------|-------|-------|-------|-------|-------|-------|
| 1.447 | 1.739 |       | 1.170 |       |       |       |       |       | 0.667 | 0.440 | 0.043 |
| 1.447 | 1.332 |       | 1.392 | 0.137 | 0.146 | 0.130 | 0.138 | 0.109 | 0.729 | 0.478 | 0.042 |
| 1.391 | 1.281 |       | 1.311 | 0.204 | 0.184 | 0.184 | 0.198 | 0.201 | 0.743 | 0.474 | 0.043 |
| 0.961 | 0.835 |       | 1.405 | 0.336 | 0.347 | 0.375 | 0.387 | 0.300 | 0.824 | 0.483 | 0.044 |
| 0.445 | 0.441 |       | 1.280 | 1.085 | 1.086 | 1.218 | 1.004 | 0.873 | 0.704 | 0.457 | 0.041 |
| 0.355 | 0.315 |       | 1.332 | 1.768 | 1.925 | 1.753 | 1.739 | 1.606 |       |       | 0.036 |
| 0.223 | 0.188 | 1.666 | 1.499 | 1.632 |       | 0.048 | 0.046 | 0.047 | 0.048 | 0.048 | 0.048 |
| 0.118 | 0.106 | 1.556 | 1.622 | 1.573 |       | 0.047 | 0.054 | 0.051 | 0.051 | 0.052 | 0.051 |

1

|       |       |       |       |       |       |       |       |       |       |       |       |
|-------|-------|-------|-------|-------|-------|-------|-------|-------|-------|-------|-------|
| 1.652 | 1.627 |       | 1.188 | 0.748 | 0.811 | 0.764 | 0.753 | 0.674 | 0.751 | 0.529 | 0.044 |
| 1.443 | 1.372 |       | 1.364 | 0.139 | 0.147 | 0.131 | 0.139 | 0.110 | 0.811 | 0.561 | 0.043 |
| 1.377 | 1.281 |       | 1.284 | 0.206 | 0.189 | 0.184 | 0.200 | 0.202 | 0.821 | 0.560 | 0.044 |
| 0.972 | 0.883 |       | 1.387 | 0.339 | 0.349 | 0.386 | 0.406 | 0.312 | 0.903 | 0.565 | 0.044 |
| 0.484 | 0.474 |       | 1.298 | 1.087 | 1.113 | 1.203 | 1.022 | 0.903 | 0.790 | 0.544 | 0.042 |
| 0.359 | 0.326 |       | 1.308 | 1.622 | 1.622 | 1.630 | 1.625 | 1.550 |       |       | 0.037 |
| 0.228 | 0.199 | 1.527 | 1.373 | 1.462 |       | 0.048 | 0.046 | 0.048 | 0.049 | 0.049 | 0.049 |
| 0.125 | 0.109 | 1.473 | 1.410 | 1.371 |       | 0.048 | 0.054 | 0.052 | 0.052 | 0.052 | 0.051 |

2

|       |       |       |       |       |       |       |       |       |       |       |       |
|-------|-------|-------|-------|-------|-------|-------|-------|-------|-------|-------|-------|
| 1.579 | 1.475 |       | 1.150 | 1.210 | 1.303 | 1.202 | 1.219 | 1.125 | 0.759 | 0.549 | 0.043 |
| 1.357 | 1.303 |       | 1.283 | 0.140 | 0.148 | 0.131 | 0.139 | 0.111 | 0.820 | 0.575 | 0.043 |
| 1.323 | 1.228 |       | 1.227 | 0.206 | 0.188 | 0.184 | 0.198 | 0.201 | 0.824 | 0.579 | 0.043 |
| 0.959 | 0.872 |       | 1.321 | 0.339 | 0.348 | 0.387 | 0.406 | 0.314 | 0.909 | 0.580 | 0.044 |
| 0.483 | 0.473 |       | 1.270 | 1.069 | 1.103 | 1.181 | 1.017 | 0.903 | 0.798 | 0.560 | 0.042 |
| 0.360 | 0.326 |       | 1.270 | 1.497 | 1.448 | 1.496 | 1.494 | 1.449 |       |       | 0.037 |
| 0.228 | 0.199 | 1.374 | 1.262 | 1.314 |       | 0.048 | 0.046 | 0.048 | 0.049 | 0.049 | 0.049 |
| 0.125 | 0.110 | 1.346 | 1.262 | 1.253 |       | 0.048 | 0.054 | 0.052 | 0.052 | 0.052 | 0.051 |

3

|       |       |  |  |       |       |       |       |       |       |       |       |
|-------|-------|--|--|-------|-------|-------|-------|-------|-------|-------|-------|
| 1.511 | 1.369 |  |  | 1.538 | 1.712 | 1.528 | 1.502 | 1.425 |       |       | 0.043 |
| 1.296 | 1.261 |  |  |       |       |       |       |       |       |       | 0.043 |
| 1.272 | 1.193 |  |  |       |       |       |       |       |       |       | 0.043 |
| 0.947 | 0.859 |  |  |       |       |       |       |       |       |       | 0.044 |
| 0.481 | 0.471 |  |  |       |       |       |       |       |       |       | 0.042 |
| 0.361 | 0.325 |  |  |       |       |       |       |       |       |       | 0.037 |
| 0.229 | 0.199 |  |  |       |       | 0.048 | 0.046 | 0.048 | 0.049 | 0.049 | 0.049 |
| 0.125 | 0.110 |  |  |       |       | 0.047 | 0.054 | 0.052 | 0.052 | 0.052 | 0.051 |

4

|       |       |       |       |       |       |       |       |       |       |       |       |
|-------|-------|-------|-------|-------|-------|-------|-------|-------|-------|-------|-------|
| 1.493 | 1.317 | 1.678 | 1.110 | 1.621 | 1.807 | 1.618 | 1.584 | 1.508 | 0.765 | 0.597 | 0.043 |
| 1.259 | 1.238 | 1.850 | 1.197 | 0.139 | 0.150 | 0.132 | 0.139 | 0.111 | 0.821 | 0.588 | 0.043 |
| 1.248 | 1.175 | 1.816 | 1.153 | 0.204 | 0.188 | 0.184 | 0.197 | 0.199 | 0.831 | 0.599 | 0.044 |
| 0.943 | 0.859 | 1.970 | 1.231 | 0.338 | 0.357 | 0.386 | 0.406 | 0.316 | 0.916 | 0.595 | 0.044 |
| 0.480 | 0.470 | 2.220 | 1.220 | 1.054 | 1.088 | 1.154 | 1.006 | 0.902 | 0.805 | 0.579 | 0.042 |
| 0.359 | 0.325 | 2.149 | 1.211 | 1.395 | 1.324 | 1.348 | 1.345 | 1.317 | 0.037 | 0.037 | 0.037 |
| 0.228 | 0.199 | 1.240 | 1.151 | 1.183 | 0.034 | 0.049 | 0.046 | 0.048 | 0.049 | 0.049 | 0.049 |
| 0.125 | 0.110 | 1.223 | 1.132 | 1.146 | 0.038 | 0.048 | 0.054 | 0.052 | 0.052 | 0.052 | 0.051 |

5

|       |       |  |       |       |       |       |       |       |       |       |       |
|-------|-------|--|-------|-------|-------|-------|-------|-------|-------|-------|-------|
| 1.434 | 1.258 |  | 1.090 | 1.648 | 1.876 | 1.649 | 1.627 | 1.535 |       |       |       |
| 1.217 | 1.201 |  | 1.149 |       |       |       |       |       |       |       |       |
| 1.205 | 1.143 |  | 1.109 |       |       |       |       |       |       |       |       |
| 0.935 | 0.845 |  | 1.182 |       |       |       |       |       |       |       |       |
| 0.477 | 0.469 |  | 1.181 |       |       |       |       |       |       |       |       |
| 0.360 | 0.323 |  | 1.167 |       |       |       |       |       |       |       |       |
| 0.229 | 0.200 |  |       |       |       | 0.049 | 0.047 | 0.048 | 0.049 | 0.049 | 0.049 |
| 0.125 | 0.110 |  |       |       |       | 0.048 | 0.054 | 0.052 | 0.052 | 0.052 | 0.051 |

6

|       |       |       |       |       |       |       |       |       |       |       |       |
|-------|-------|-------|-------|-------|-------|-------|-------|-------|-------|-------|-------|
| 1.013 | 0.810 |       | 0.668 | 0.808 | 0.940 | 0.720 | 0.798 | 0.687 | 0.904 | 0.845 | 0.043 |
| 0.709 | 0.827 |       | 0.703 | 0.142 | 0.156 | 0.136 | 0.137 | 0.116 | 0.990 | 0.846 | 0.042 |
| 0.682 | 0.692 |       | 0.680 | 0.197 | 0.188 | 0.190 | 0.191 | 0.184 | 1.023 | 0.861 | 0.043 |
| 0.507 | 0.519 |       | 0.740 | 0.316 | 0.264 | 0.364 | 0.377 | 0.312 | 1.111 | 0.870 | 0.043 |
| 0.394 | 0.406 |       | 0.682 | 0.580 | 0.561 | 0.600 | 0.529 | 0.563 | 0.962 | 0.834 | 0.042 |
| 0.333 | 0.322 |       | 0.661 | 0.995 | 0.930 | 0.848 | 0.832 | 0.797 | 0.037 | 0.037 | 0.037 |
| 0.229 | 0.201 | 0.843 | 0.679 | 0.732 |       | 0.048 | 0.046 | 0.047 |       |       | 0.047 |
| 0.124 | 0.111 | 0.773 | 0.682 | 0.701 |       | 0.047 | 0.053 | 0.051 | 0.051 | 0.052 | 0.051 |

7

skin cultivation



|                    |              |                              |                            |                              |                              |
|--------------------|--------------|------------------------------|----------------------------|------------------------------|------------------------------|
| Project number     | F-120        | Apparatus                    | Wallac Victor              | Operator                     | IsBa                         |
| GLP Study (Number) | n.a.         | Protocol (instrument method) | LDH test 2016              | Date of preparation          | 19-04-18                     |
| hot substance      | isotope      | File name (results)          | IsBa_180419/20_LDH_full_v2 | Date of measurement          | 19-04-18                     |
|                    | name         | Kind of well plate           | 96 well                    | shaking time [min]           | 30                           |
| cold substance     | ACB-ID       | sample volume [µL]           | 100                        | stirring rate (Target) [rpm] | 150                          |
|                    | Batch number | Cocktail volume [µL]         | 175                        | Kind of measurement          | UV-vis                       |
|                    | name         | ACB-ID of cocktail           |                            | Wave length [nm]             | 450                          |
|                    | ACB-ID       | Matrix                       | DMEM (from powder)+PEG     | Remarks                      | Cocktail 100µl RM, 75µl STOP |
| n.a.               | Batch number | Blank description            | DMEM/PEG, H2O              | Remarks                      | 7 standards split low/high   |
| n.a.               | n.a.         | Pipettes (No. / volume)      | 50-200µl                   | Remarks                      | KLP4 common for both         |
| n.a.               | n.a.         | Pipettes (No. / volume)      | n.a.                       | Remarks                      | n.a.                         |

Messdaten (diese Tabelle in Bericht übernehmen)

| Sample name * | concentration (theor.) * | measured data | measured data | mean measured | SD    | RSD   | Blank * | measured data after * Blank subtraction | concentration (calc.) * | Deviation * | Residuen |
|---------------|--------------------------|---------------|---------------|---------------|-------|-------|---------|-----------------------------------------|-------------------------|-------------|----------|
|               | [µg/mL]                  | [AU]          | [AU]          | [AU]          | [AU]  | [%]   | [AU]    |                                         | [µg/mL]                 | [%]         |          |
| KLP1          |                          |               |               |               |       |       | 0.047   |                                         |                         |             |          |
| KLP2          |                          |               |               |               |       |       | 0.054   |                                         |                         |             |          |
| KLP3          |                          |               |               |               |       |       | 0.051   |                                         |                         |             |          |
| KLP4          | 0.041                    | 0.959         | 0.972         | 0.883         | 0.938 | 0.04  | 4.19    | 0.051                                   | 0.887                   | 0.041       | -0.57    |
| KLP5          | 0.018                    | 0.483         | 0.484         | 0.474         | 0.480 | 0.00  | 0.98    | 0.052                                   | 0.429                   | 0.019       | 2.42     |
| KLP6          | 0.012                    | 0.360         | 0.359         | 0.326         | 0.348 | 0.02  | 4.54    | 0.051                                   | 0.297                   | 0.013       | 5.00     |
| KLP7          | 0.007                    | 0.228         | 0.228         | 0.199         | 0.218 | 0.014 | 6.35    |                                         | 0.168                   | 0.006       | -11.29   |
| KLP8          |                          |               |               |               |       |       |         |                                         |                         |             |          |

Statistical data

|                                              |                                          |                     |              |
|----------------------------------------------|------------------------------------------|---------------------|--------------|
| Geradensteigung                              | Slope                                    | m                   | 21.03        |
| Y-Achsenabschnitt                            | Y-Intercept                              | b                   | 0.03         |
| Standardabw. Geradensteigung                 | SD-Slope                                 | S <sub>m</sub>      | 0.648055501  |
| Standardabw. Achsenabschnittes               | SD-Y-Intercept                           | S <sub>b</sub>      | 0.015177452  |
| Anzahl Messpunkte                            | number of measuring points               | n                   | 4            |
| Quadratsumme                                 | sum of squares                           | Q <sub>xx</sub>     | 0.000664046  |
| Bereichsmittle                               |                                          |                     | 0.019557193  |
| Freiheitsgrade                               | degree of freedom                        | f                   | 2            |
| Student-t-Faktor für (P = 95 %; f = n-2)     | Student-t-factor for (P = 95 %; f = n-2) | t                   | 4.303        |
| Vertrauensbereich Steig. (95 %) Obergrenze   |                                          | m + VB <sub>m</sub> | 23.81763508  |
| Vertrauensbereich Steig. (95 %) Untergrenze  |                                          | m - VB <sub>m</sub> | 18.24046944  |
| Vertrauensbereich Achsenabschnitt (95 %) Og. |                                          | b + VB <sub>b</sub> | 0.099335829  |
| Vertrauensbereich Achsenabschnitt (95 %) Ug. |                                          | b - VB <sub>b</sub> | -0.031281327 |
| Korrelationskoeffizient                      | correlation coefficient                  | r                   | 0.9991       |
| Bestimmtheitsmaß                             | determination coefficient                | r <sup>2</sup>      | 0.9981       |
| Reststandardabweichung                       |                                          | S <sub>0</sub>      | 0.01669983   |
| Summe Restquadrate                           |                                          | sd                  | 0.657385838  |
| Verfahrensstandardabw.                       |                                          | S <sub>00</sub>     | 0.000794131  |
| Rel. Verfahrensstandardabw. %                |                                          | V <sub>00</sub>     | 4.060559029  |

Berichten

|                          |       |
|--------------------------|-------|
| mean Blank               | 0     |
| SD Blank                 | 0.00  |
| RSD Blank                | 3.79  |
| x <sup>2</sup> SD (LLOQ) | 0.01  |
| x <sup>2</sup> SD (LOD)  | 0.01  |
| LLOQ (AU)                | 0.061 |
| LOD (AU)                 | 0.067 |
| ULOQ                     | 0.887 |
| LLOQ (Lin)               | 0.168 |

Evaluation / Comment

LDH linearity valid with 7 standards, split in lin high and lin low, each with 4 standards and KLP4 common standard for both. R<sup>2</sup> 0,9981, deviations for both between -13.34% and +13.04%

Date Operator Date Operator Control



Figure 1 Linearity



Figure 2 Method validation Residuen Plot



Evaluation / Comment

lin passed

Date

Operator

Date

Control

| Sample name | Plate | Position | [AU]  | [AU]-Blank | Rating       | [µg/mL] | Dilution factor | [µg/mL] |
|-------------|-------|----------|-------|------------|--------------|---------|-----------------|---------|
| 0           | TO    | A01      | 0     | 0          | kleiner LLOQ | #VALUE! | 1               | #VALUE! |
| 0           | TO    | A02      | 0     | 0          | kleiner LLOQ | #VALUE! | 1               | #VALUE! |
| 0           | TO    | A03      | 0     | 0          | kleiner LLOQ | #VALUE! | 1               | #VALUE! |
| 0           | TO    | A04      | 0     | 0          | kleiner LLOQ | #VALUE! | 1               | #VALUE! |
| 0           | TO    | A05      | 0     | 0          | kleiner LLOQ | #VALUE! | 1               | #VALUE! |
| 0           | TO    | A06      | 0     | 0          | kleiner LLOQ | #VALUE! | 1               | #VALUE! |
| 0           | TO    | A07      | 0     | 0          | kleiner LLOQ | #VALUE! | 1               | #VALUE! |
| 0           | TO    | A08      | 0     | 0          | kleiner LLOQ | #VALUE! | 1               | #VALUE! |
| 0           | TO    | A09      | 0     | 0          | kleiner LLOQ | #VALUE! | 1               | #VALUE! |
| 0           | TO    | A10      | 0     | 0          | kleiner LLOQ | #VALUE! | 1               | #VALUE! |
| 0           | TO    | A11      | 0     | 0          | kleiner LLOQ | #VALUE! | 1               | #VALUE! |
| 0           | TO    | A12      | 0     | 0          | kleiner LLOQ | #VALUE! | 1               | #VALUE! |
| 0           | TO    | B01      | 0     | 0          | kleiner LLOQ | #VALUE! | 1               | #VALUE! |
| 0           | TO    | B02      | 0     | 0          | kleiner LLOQ | #VALUE! | 1               | #VALUE! |
| 0           | TO    | B03      | 0     | 0          | kleiner LLOQ | #VALUE! | 1               | #VALUE! |
| 0           | TO    | B04      | 0     | 0          | kleiner LLOQ | #VALUE! | 1               | #VALUE! |
| 0           | TO    | B05      | 0     | 0          | kleiner LLOQ | #VALUE! | 1               | #VALUE! |
| 0           | TO    | B06      | 0     | 0          | kleiner LLOQ | #VALUE! | 1               | #VALUE! |
| 0           | TO    | B07      | 0     | 0          | kleiner LLOQ | #VALUE! | 1               | #VALUE! |
| 0           | TO    | B08      | 0     | 0          | kleiner LLOQ | #VALUE! | 1               | #VALUE! |
| 0           | TO    | B09      | 0     | 0          | kleiner LLOQ | #VALUE! | 1               | #VALUE! |
| 0           | TO    | B10      | 0     | 0          | kleiner LLOQ | #VALUE! | 1               | #VALUE! |
| 0           | TO    | B11      | 0     | 0          | kleiner LLOQ | #VALUE! | 1               | #VALUE! |
| 0           | TO    | B12      | 0     | 0          | kleiner LLOQ | #VALUE! | 1               | #VALUE! |
| 0           | TO    | C01      | 0     | 0          | kleiner LLOQ | #VALUE! | 1               | #VALUE! |
| 0           | TO    | C02      | 0     | 0          | kleiner LLOQ | #VALUE! | 1               | #VALUE! |
| 0           | TO    | C03      | 0     | 0          | kleiner LLOQ | #VALUE! | 1               | #VALUE! |
| 0           | TO    | C04      | 0     | 0          | kleiner LLOQ | #VALUE! | 1               | #VALUE! |
| 0           | TO    | C05      | 0     | 0          | kleiner LLOQ | #VALUE! | 1               | #VALUE! |
| 0           | TO    | C06      | 0     | 0          | kleiner LLOQ | #VALUE! | 1               | #VALUE! |
| 0           | TO    | C07      | 0     | 0          | kleiner LLOQ | #VALUE! | 1               | #VALUE! |
| 0           | TO    | C08      | 0     | 0          | kleiner LLOQ | #VALUE! | 1               | #VALUE! |
| 0           | TO    | C09      | 0     | 0          | kleiner LLOQ | #VALUE! | 1               | #VALUE! |
| 0           | TO    | C10      | 0     | 0          | kleiner LLOQ | #VALUE! | 1               | #VALUE! |
| 0           | TO    | C11      | 0     | 0          | kleiner LLOQ | #VALUE! | 1               | #VALUE! |
| 0           | TO    | C12      | 0     | 0          | kleiner LLOQ | #VALUE! | 1               | #VALUE! |
| 0           | TO    | D01      | 0     | 0          | kleiner LLOQ | #VALUE! | 1               | #VALUE! |
| 0           | TO    | D02      | 0     | 0          | kleiner LLOQ | #VALUE! | 1               | #VALUE! |
| 0           | TO    | D03      | 0     | 0          | kleiner LLOQ | #VALUE! | 1               | #VALUE! |
| 0           | TO    | D04      | 0     | 0          | kleiner LLOQ | #VALUE! | 1               | #VALUE! |
| T04SN1      | TO    | D05      | 0     | 0          | kleiner LLOQ | #VALUE! | 1               | #VALUE! |
| T04SN1      | TO    | D06      | 0     | 0          | kleiner LLOQ | #VALUE! | 1               | #VALUE! |
| T04SN2      | TO    | D07      | 0     | 0          | kleiner LLOQ | #VALUE! | 1               | #VALUE! |
| T04SN2      | TO    | D08      | 0     | 0          | kleiner LLOQ | #VALUE! | 1               | #VALUE! |
| T04SN3      | TO    | D09      | 0     | 0          | kleiner LLOQ | #VALUE! | 1               | #VALUE! |
| T04SN3      | TO    | D10      | 0     | 0          | kleiner LLOQ | #VALUE! | 1               | #VALUE! |
| T04SN4      | TO    | D11      | 0     | 0          | kleiner LLOQ | #VALUE! | 1               | #VALUE! |
| T04SN4      | TO    | D12      | 0.742 | 0.691      | 0.691        | 0.031   | 11              | 0.344   |

Plate: TO

|   | 1     | 2     | 3     | 4     | 5     | 6     | 7     | 8     | 9     | 10    | 11    | 12    |
|---|-------|-------|-------|-------|-------|-------|-------|-------|-------|-------|-------|-------|
| A |       |       |       |       |       |       |       |       |       |       |       |       |
| B |       |       |       |       |       |       |       |       |       |       |       |       |
| C |       |       |       |       |       |       |       |       |       |       |       |       |
| D |       |       |       |       |       |       |       |       |       |       |       | 0.742 |
| E |       |       |       |       |       |       |       |       |       |       | 0.618 | 0.508 |
| F |       |       |       |       |       |       |       |       |       |       | 0.912 | 0.852 |
| G | 0.065 | 0.066 | 0.062 | 0.072 | 0.060 | 0.070 | 0.056 | 0.057 | 0.057 | 0.055 | 0.056 | 0.054 |
| H | 0.044 | 0.045 | 0.048 | 0.046 | 0.047 | 0.044 | 0.051 | 0.051 | 0.051 | 0.054 | 0.05  | 0.049 |

Plattenbelegung

|   | 1            | 2            | 3            | 4            | 5            | 6            | 7            | 8            | 9            | 10           | 11           | 12           |
|---|--------------|--------------|--------------|--------------|--------------|--------------|--------------|--------------|--------------|--------------|--------------|--------------|
| A |              |              |              |              |              |              |              |              |              |              |              |              |
| B |              |              |              |              |              |              |              |              |              |              |              |              |
| C |              |              |              |              |              |              |              |              |              |              |              |              |
| D |              |              |              |              | T04SN1       | T04SN1       | T04SN2       | T04SN2       | T04SN3       | T04SN3       | T04SN4       | T04SN4       |
| E |              |              |              |              | T04SS11      | T04SS11      | T04SS12      | T04SS12      | T04SS13      | T04SS13      | T04SS14      | T04SS14      |
| F |              |              |              |              | T04SS21      | T04SS21      | T04SS22      | T04SS22      | T04SS23      | T04SS23      | T04SS24      | T04SS24      |
| G | Blank PEG    | Blank PEG    | Blank PEG    | Blank PEG    | Blank PEG    | Blank PEG    | Blank PEG    | Blank PEG    | Blank PEG    | Blank PEG    | Blank PEG    | Blank PEG    |
| H | Blank no PEG | Blank no PEG | Blank no PEG | Blank no PEG | Blank no PEG | Blank no PEG | Blank no PEG | Blank no PEG | Blank no PEG | Blank no PEG | Blank no PEG | Blank no PEG |

Samples aufgeteilt in lin high und low.höher konzentrierte Samples bei lin high zu finden.

dil.4\*dil.2,75=dil.11  
 dil4\*dil.8\*dil.2,75=dil.88  
 oder nur von ursprngl. Dil 4 auf dil 8 erhöht???

Comment:

Date Operator

Date Control

|              |    |     |       |       |              |         |      |         |
|--------------|----|-----|-------|-------|--------------|---------|------|---------|
| 0            | TO | E01 | 0     | 0     | kleiner LLOQ | #VALUE! | 1    | #VALUE! |
| 0            | TO | E02 | 0     | 0     | kleiner LLOQ | #VALUE! | 1    | #VALUE! |
| 0            | TO | E03 | 0     | 0     | kleiner LLOQ | #VALUE! | 1    | #VALUE! |
| 0            | TO | E04 | 0     | 0     | kleiner LLOQ | #VALUE! | 1    | #VALUE! |
| T04SS11      | TO | E05 | 0     | 0     | kleiner LLOQ | #VALUE! | 1    | #VALUE! |
| T04SS11      | TO | E06 | 0     | 0     | kleiner LLOQ | #VALUE! | 1    | #VALUE! |
| T04SS12      | TO | E07 | 0     | 0     | kleiner LLOQ | #VALUE! | 1    | #VALUE! |
| T04SS12      | TO | E08 | 0     | 0     | kleiner LLOQ | #VALUE! | 1    | #VALUE! |
| T04SS13      | TO | E09 | 0     | 0     | kleiner LLOQ | #VALUE! | 1    | #VALUE! |
| T04SS13      | TO | E10 | 0     | 0     | kleiner LLOQ | #VALUE! | 1    | #VALUE! |
| T04SS14      | TO | E11 | 0.618 | 0.567 | 0.567        | 0.025   | 11   | 0.279   |
| T04SS14      | TO | E12 | 0.508 | 0.457 | 0.457        | 0.020   | 11   | 0.221   |
| 0            | TO | F01 | 0     | 0     | kleiner LLOQ | #VALUE! | 1    | #VALUE! |
| 0            | TO | F02 | 0     | 0     | kleiner LLOQ | #VALUE! | 1    | #VALUE! |
| 0            | TO | F03 | 0     | 0     | kleiner LLOQ | #VALUE! | 1    | #VALUE! |
| 0            | TO | F04 | 0     | 0     | kleiner LLOQ | #VALUE! | 1    | #VALUE! |
| T04SS21      | TO | F05 | 0     | 0     | kleiner LLOQ | #VALUE! | 1    | #VALUE! |
| T04SS21      | TO | F06 | 0     | 0     | kleiner LLOQ | #VALUE! | 1    | #VALUE! |
| T04SS22      | TO | F07 | 0     | 0     | kleiner LLOQ | #VALUE! | 1    | #VALUE! |
| T04SS22      | TO | F08 | 0     | 0     | kleiner LLOQ | #VALUE! | 1    | #VALUE! |
| T04SS23      | TO | F09 | 0     | 0     | kleiner LLOQ | #VALUE! | 1    | #VALUE! |
| T04SS23      | TO | F10 | 0     | 0     | kleiner LLOQ | #VALUE! | 1    | #VALUE! |
| T04SS24      | TO | F11 | 0.912 | 0.861 | 0.861        | 0.039   | 11   | 0.433   |
| T04SS24      | TO | F12 | 0.852 | 0.801 | 0.801        | 0.036   | 11   | 0.401   |
| Blank PEG    | TO | G01 | 0     | 0     | kleiner LLOQ | #VALUE! | 2.75 | #VALUE! |
| Blank PEG    | TO | G02 | 0     | 0     | kleiner LLOQ | #VALUE! | 2.75 | #VALUE! |
| Blank PEG    | TO | G03 | 0     | 0     | kleiner LLOQ | #VALUE! | 2.75 | #VALUE! |
| Blank PEG    | TO | G04 | 0     | 0     | kleiner LLOQ | #VALUE! | 2.75 | #VALUE! |
| Blank PEG    | TO | G05 | 0     | 0     | kleiner LLOQ | #VALUE! | 2.75 | #VALUE! |
| Blank PEG    | TO | G06 | 0     | 0     | kleiner LLOQ | #VALUE! | 2.75 | #VALUE! |
| Blank PEG    | TO | G07 | 0     | 0     | kleiner LLOQ | #VALUE! | 2.75 | #VALUE! |
| Blank PEG    | TO | G08 | 0     | 0     | kleiner LLOQ | #VALUE! | 2.75 | #VALUE! |
| Blank PEG    | TO | G09 | 0     | 0     | kleiner LLOQ | #VALUE! | 2.75 | #VALUE! |
| Blank PEG    | TO | G10 | 0     | 0     | kleiner LLOQ | #VALUE! | 2.75 | #VALUE! |
| Blank PEG    | TO | G11 | 0     | 0     | kleiner LLOQ | #VALUE! | 2.75 | #VALUE! |
| Blank PEG    | TO | G12 | 0     | 0     | kleiner LLOQ | #VALUE! | 2.75 | #VALUE! |
| Blank no PEG | TO | H01 | 0     | 0     | kleiner LLOQ | #VALUE! | 2.75 | #VALUE! |
| Blank no PEG | TO | H02 | 0     | 0     | kleiner LLOQ | #VALUE! | 2.75 | #VALUE! |
| Blank no PEG | TO | H03 | 0     | 0     | kleiner LLOQ | #VALUE! | 2.75 | #VALUE! |
| Blank no PEG | TO | H04 | 0     | 0     | kleiner LLOQ | #VALUE! | 2.75 | #VALUE! |
| Blank no PEG | TO | H05 | 0     | 0     | kleiner LLOQ | #VALUE! | 2.75 | #VALUE! |
| Blank no PEG | TO | H06 | 0     | 0     | kleiner LLOQ | #VALUE! | 2.75 | #VALUE! |
| Blank no PEG | TO | H07 | 0     | 0     | kleiner LLOQ | #VALUE! | 2.75 | #VALUE! |
| Blank no PEG | TO | H08 | 0     | 0     | kleiner LLOQ | #VALUE! | 2.75 | #VALUE! |
| Blank no PEG | TO | H09 | 0     | 0     | kleiner LLOQ | #VALUE! | 2.75 | #VALUE! |
| Blank no PEG | TO | H10 | 0     | 0     | kleiner LLOQ | #VALUE! | 2.75 | #VALUE! |
| Blank no PEG | TO | H11 | 0     | 0     | kleiner LLOQ | #VALUE! | 2.75 | #VALUE! |
| Blank no PEG | TO | H12 | 0     | 0     | kleiner LLOQ | #VALUE! | 2.75 | #VALUE! |

|       |    |     |       |       |              |         |       |         |
|-------|----|-----|-------|-------|--------------|---------|-------|---------|
| 0     | T1 | A01 | 0     | 0     | kleiner LLOQ | #VALUE! | 1     | #VALUE! |
| 0     | T1 | A02 | 0     | 0     | kleiner LLOQ | #VALUE! | 1     | #VALUE! |
| 0     | T1 | A03 | 0     | 0     | kleiner LLOQ | #VALUE! | 1     | #VALUE! |
| 0     | T1 | A04 | 0     | 0     | kleiner LLOQ | #VALUE! | 1     | #VALUE! |
| 0     | T1 | A05 | 0     | 0     | kleiner LLOQ | #VALUE! | 1     | #VALUE! |
| 0     | T1 | A06 | 0     | 0     | kleiner LLOQ | #VALUE! | 1     | #VALUE! |
| 0     | T1 | A07 | 0     | 0     | kleiner LLOQ | #VALUE! | 1     | #VALUE! |
| 0     | T1 | A08 | 0     | 0     | kleiner LLOQ | #VALUE! | 1     | #VALUE! |
| 0     | T1 | A09 | 0     | 0     | kleiner LLOQ | #VALUE! | 1     | #VALUE! |
| 0     | T1 | A10 | 0     | 0     | kleiner LLOQ | #VALUE! | 1     | #VALUE! |
| 0     | T1 | A11 | 0     | 0     | kleiner LLOQ | #VALUE! | 1     | #VALUE! |
| 0     | T1 | A12 | 0     | 0     | kleiner LLOQ | #VALUE! | 1     | #VALUE! |
| 0     | T1 | B01 | 0     | 0     | kleiner LLOQ | #VALUE! | 1     | #VALUE! |
| 0     | T1 | B02 | 0     | 0     | kleiner LLOQ | #VALUE! | 1     | #VALUE! |
| 0     | T1 | B03 | 0     | 0     | kleiner LLOQ | #VALUE! | 1     | #VALUE! |
| 0     | T1 | B04 | 0     | 0     | kleiner LLOQ | #VALUE! | 1     | #VALUE! |
| 0     | T1 | B05 | 0     | 0     | kleiner LLOQ | #VALUE! | 1     | #VALUE! |
| 0     | T1 | B06 | 0     | 0     | kleiner LLOQ | #VALUE! | 1     | #VALUE! |
| 0     | T1 | B07 | 0     | 0     | kleiner LLOQ | #VALUE! | 1     | #VALUE! |
| 0     | T1 | B08 | 0     | 0     | kleiner LLOQ | #VALUE! | 1     | #VALUE! |
| 0     | T1 | B09 | 0     | 0     | kleiner LLOQ | #VALUE! | 1     | #VALUE! |
| 0     | T1 | B10 | 0     | 0     | kleiner LLOQ | #VALUE! | 1     | #VALUE! |
| 0     | T1 | B11 | 0     | 0     | kleiner LLOQ | #VALUE! | 1     | #VALUE! |
| 0     | T1 | B12 | 0     | 0     | kleiner LLOQ | #VALUE! | 1     | #VALUE! |
| 0     | T1 | C01 | 0     | 0     | kleiner LLOQ | #VALUE! | 1     | #VALUE! |
| 0     | T1 | C02 | 0     | 0     | kleiner LLOQ | #VALUE! | 1     | #VALUE! |
| 0     | T1 | C03 | 0     | 0     | kleiner LLOQ | #VALUE! | 1     | #VALUE! |
| 0     | T1 | C04 | 0     | 0     | kleiner LLOQ | #VALUE! | 1     | #VALUE! |
| 0     | T1 | C05 | 0     | 0     | kleiner LLOQ | #VALUE! | 1     | #VALUE! |
| 0     | T1 | C06 | 0     | 0     | kleiner LLOQ | #VALUE! | 1     | #VALUE! |
| 0     | T1 | C07 | 0     | 0     | kleiner LLOQ | #VALUE! | 1     | #VALUE! |
| 0     | T1 | C08 | 0     | 0     | kleiner LLOQ | #VALUE! | 1     | #VALUE! |
| 0     | T1 | C09 | 0     | 0     | kleiner LLOQ | #VALUE! | 1     | #VALUE! |
| 0     | T1 | C10 | 0     | 0     | kleiner LLOQ | #VALUE! | 1     | #VALUE! |
| 0     | T1 | C11 | 0     | 0     | kleiner LLOQ | #VALUE! | 1     | #VALUE! |
| 0     | T1 | C12 | 0     | 0     | kleiner LLOQ | #VALUE! | 1     | #VALUE! |
| 0     | T1 | D01 | 0     | 0     | kleiner LLOQ | #VALUE! | 1     | #VALUE! |
| 0     | T1 | D02 | 0     | 0     | kleiner LLOQ | #VALUE! | 1     | #VALUE! |
| 0     | T1 | D03 | 0     | 0     | kleiner LLOQ | #VALUE! | 1     | #VALUE! |
| 0     | T1 | D04 | 0     | 0     | kleiner LLOQ | #VALUE! | 1     | #VALUE! |
| 0     | T1 | D05 | 0     | 0     | kleiner LLOQ | #VALUE! | 1     | #VALUE! |
| 0     | T1 | D06 | 0     | 0     | kleiner LLOQ | #VALUE! | 1     | #VALUE! |
| 0     | T1 | D07 | 0     | 0     | kleiner LLOQ | #VALUE! | 1     | #VALUE! |
| 0     | T1 | D08 | 0     | 0     | kleiner LLOQ | #VALUE! | 1     | #VALUE! |
| 0     | T1 | D09 | 0     | 0     | kleiner LLOQ | #VALUE! | 1     | #VALUE! |
| 0     | T1 | D10 | 0     | 0     | kleiner LLOQ | #VALUE! | 1     | #VALUE! |
| T1SN4 | T1 | D11 | 0.342 | 0.291 | 0.291        | 0.012   | 24.75 | 0.303   |
| T1SN4 | T1 | D12 | 0.313 | 0.262 | 0.262        | 0.011   | 24.75 | 0.268   |

Plate: T1

|   |       |       |       |       |       |       |       |       |       |       |       |       |
|---|-------|-------|-------|-------|-------|-------|-------|-------|-------|-------|-------|-------|
|   | 1     | 2     | 3     | 4     | 5     | 6     | 7     | 8     | 9     | 10    | 11    | 12    |
| A |       |       |       |       |       |       |       |       |       |       |       |       |
| B |       |       |       |       |       |       |       |       |       |       |       |       |
| C |       |       |       |       |       |       |       |       |       |       |       |       |
| D |       |       |       |       |       |       |       |       |       |       | 0.342 | 0.313 |
| E |       |       |       |       |       |       |       |       |       |       | 0.439 | 0.439 |
| F |       |       |       |       |       |       |       |       | 0.497 | 0.475 | 0.692 | 0.690 |
| G | 0.285 | 0.299 |       |       | 0.555 | 0.519 | 0.065 | 0.053 | 0.052 | 0.056 | 0.050 | 0.055 |
| H | 0.381 | 0.357 | 0.306 | 0.303 |       |       | 0.051 | 0.051 | 0.051 | 0.052 | 0.052 | 0.051 |

Plattenbelegung

|   |        |        |        |        |       |       |              |              |              |              |              |              |
|---|--------|--------|--------|--------|-------|-------|--------------|--------------|--------------|--------------|--------------|--------------|
|   | 1      | 2      | 3      | 4      | 5     | 6     | 7            | 8            | 9            | 10           | 11           | 12           |
| A |        |        |        |        |       |       |              |              |              |              |              |              |
| B |        |        |        |        |       |       |              |              |              |              |              |              |
| C |        |        |        |        |       |       |              |              |              |              |              |              |
| D |        |        |        |        |       |       |              |              |              |              |              |              |
| E |        |        |        |        |       |       | T1SN2        | T1SN2        |              |              |              |              |
| F |        |        |        |        |       |       |              |              |              |              | T1SN4        | T1SN4        |
| G | T1SN3  | T1SN3  |        |        | T1SN1 | T1SN1 | Blank PEG    | Blank PEG    | Blank PEG    | Blank PEG    | Blank PEG    | Blank PEG    |
| H | T1SS12 | T1SS12 | T1SS13 | T1SS13 |       |       | Blank no PEG | Blank no PEG | Blank no PEG | Blank no PEG | Blank no PEG | Blank no PEG |

Comment:

dil. 5\*dil. 2,75=dil. 13,75  
dil. 9\*dil. 2,75=dil. 24,75  
dil. 9\*dil. 4\*dil. 2,75=dil. 99  
dil. 9\*dil. 9\*dil. 2,75=dil. 222,75

Date Operator Date Control

|              |    |     |       |       |              |         |        |         |
|--------------|----|-----|-------|-------|--------------|---------|--------|---------|
| 0            | T1 | E01 | 0     | 0     | kleiner LLOQ | #VALUE! | 1      | #VALUE! |
| 0            | T1 | E02 | 0     | 0     | kleiner LLOQ | #VALUE! | 1      | #VALUE! |
| 0            | T1 | E03 | 0     | 0     | kleiner LLOQ | #VALUE! | 1      | #VALUE! |
| 0            | T1 | E04 | 0     | 0     | kleiner LLOQ | #VALUE! | 1      | #VALUE! |
| 0            | T1 | E05 | 0     | 0     | kleiner LLOQ | #VALUE! | 1      | #VALUE! |
| 0            | T1 | E06 | 0     | 0     | kleiner LLOQ | #VALUE! | 1      | #VALUE! |
| 0            | T1 | E07 | 0     | 0     | kleiner LLOQ | #VALUE! | 1      | #VALUE! |
| 0            | T1 | E08 | 0     | 0     | kleiner LLOQ | #VALUE! | 1      | #VALUE! |
| 0            | T1 | E09 | 0     | 0     | kleiner LLOQ | #VALUE! | 1      | #VALUE! |
| 0            | T1 | E10 | 0     | 0     | kleiner LLOQ | #VALUE! | 1      | #VALUE! |
| T1SS14       | T1 | E11 | 0.439 | 0.388 | 0.388        | 0.017   | 24.75  | 0.416   |
| T1SS14       | T1 | E12 | 0.439 | 0.388 | 0.388        | 0.017   | 24.75  | 0.416   |
| 0            | T1 | F01 | 0     | 0     | kleiner LLOQ | #VALUE! | 1      | #VALUE! |
| 0            | T1 | F02 | 0     | 0     | kleiner LLOQ | #VALUE! | 1      | #VALUE! |
| 0            | T1 | F03 | 0     | 0     | kleiner LLOQ | #VALUE! | 1      | #VALUE! |
| 0            | T1 | F04 | 0     | 0     | kleiner LLOQ | #VALUE! | 1      | #VALUE! |
| 0            | T1 | F05 | 0     | 0     | kleiner LLOQ | #VALUE! | 1      | #VALUE! |
| 0            | T1 | F06 | 0     | 0     | kleiner LLOQ | #VALUE! | 1      | #VALUE! |
| 0            | T1 | F07 | 0     | 0     | kleiner LLOQ | #VALUE! | 1      | #VALUE! |
| 0            | T1 | F08 | 0     | 0     | kleiner LLOQ | #VALUE! | 1      | #VALUE! |
| T1SS23       | T1 | F09 | 0.497 | 0.447 | 0.447        | 0.020   | 24.75  | 0.486   |
| T1SS23       | T1 | F10 | 0.475 | 0.424 | 0.424        | 0.019   | 24.75  | 0.459   |
| T1SS24       | T1 | F11 | 0.692 | 0.641 | 0.641        | 0.029   | 24.75  | 0.714   |
| T1SS24       | T1 | F12 | 0.690 | 0.639 | 0.639        | 0.029   | 24.75  | 0.712   |
| T1SN3        | T1 | G01 | 0.285 | 0.234 | 0.234        | 0.010   | 222.75 | 2.118   |
| T1SN3        | T1 | G02 | 0.298 | 0.247 | 0.247        | 0.010   | 222.75 | 2.254   |
| 0            | T1 | G03 | 0     | 0     | kleiner LLOQ | #VALUE! | 1      | #VALUE! |
| 0            | T1 | G04 | 0     | 0     | kleiner LLOQ | #VALUE! | 1      | #VALUE! |
| T1SN1        | T1 | G05 | 0.555 | 0.504 | 0.504        | 0.022   | 99     | 2.214   |
| T1SN1        | T1 | G06 | 0.519 | 0.468 | 0.468        | 0.021   | 99     | 2.043   |
| Blank PEG    | T1 | G07 | 0     | 0     | kleiner LLOQ | #VALUE! | 2.75   | #VALUE! |
| Blank PEG    | T1 | G08 | 0     | 0     | kleiner LLOQ | #VALUE! | 2.75   | #VALUE! |
| Blank PEG    | T1 | G09 | 0     | 0     | kleiner LLOQ | #VALUE! | 2.75   | #VALUE! |
| Blank PEG    | T1 | G10 | 0     | 0     | kleiner LLOQ | #VALUE! | 2.75   | #VALUE! |
| Blank PEG    | T1 | G11 | 0     | 0     | kleiner LLOQ | #VALUE! | 2.75   | #VALUE! |
| Blank PEG    | T1 | G12 | 0     | 0     | kleiner LLOQ | #VALUE! | 2.75   | #VALUE! |
| T1SS12       | T1 | H01 | 0.381 | 0.330 | 0.330        | 0.014   | 222.75 | 3.134   |
| T1SS12       | T1 | H02 | 0.357 | 0.306 | 0.306        | 0.013   | 222.75 | 2.880   |
| T1SS13       | T1 | H03 | 0.306 | 0.255 | 0.255        | 0.010   | 222.75 | 2.337   |
| T1SS13       | T1 | H04 | 0.303 | 0.252 | 0.252        | 0.010   | 222.75 | 2.312   |
| 0            | T1 | H05 | 0     | 0     | kleiner LLOQ | #VALUE! | 1      | #VALUE! |
| 0            | T1 | H06 | 0     | 0     | kleiner LLOQ | #VALUE! | 1      | #VALUE! |
| Blank no PEG | T1 | H07 | 0     | 0     | kleiner LLOQ | #VALUE! | 2.75   | #VALUE! |
| Blank no PEG | T1 | H08 | 0     | 0     | kleiner LLOQ | #VALUE! | 2.75   | #VALUE! |
| Blank no PEG | T1 | H09 | 0     | 0     | kleiner LLOQ | #VALUE! | 2.75   | #VALUE! |
| Blank no PEG | T1 | H10 | 0     | 0     | kleiner LLOQ | #VALUE! | 2.75   | #VALUE! |
| Blank no PEG | T1 | H11 | 0     | 0     | kleiner LLOQ | #VALUE! | 2.75   | #VALUE! |
| Blank no PEG | T1 | H12 | 0     | 0     | kleiner LLOQ | #VALUE! | 2.75   | #VALUE! |
| 0            | T2 | A01 | 0     | 0     | kleiner LLOQ | #VALUE! | 1      | #VALUE! |
| 0            | T2 | A02 | 0     | 0     | kleiner LLOQ | #VALUE! | 1      | #VALUE! |
| 0            | T2 | A03 | 0     | 0     | kleiner LLOQ | #VALUE! | 1      | #VALUE! |
| 0            | T2 | A04 | 0     | 0     | kleiner LLOQ | #VALUE! | 1      | #VALUE! |
| 0            | T2 | A05 | 0     | 0     | kleiner LLOQ | #VALUE! | 1      | #VALUE! |
| 0            | T2 | A06 | 0     | 0     | kleiner LLOQ | #VALUE! | 1      | #VALUE! |
| 0            | T2 | A07 | 0     | 0     | kleiner LLOQ | #VALUE! | 1      | #VALUE! |
| 0            | T2 | A08 | 0     | 0     | kleiner LLOQ | #VALUE! | 1      | #VALUE! |
| 0            | T2 | A09 | 0     | 0     | kleiner LLOQ | #VALUE! | 1      | #VALUE! |
| 0            | T2 | A10 | 0     | 0     | kleiner LLOQ | #VALUE! | 1      | #VALUE! |
| 0            | T2 | A11 | 0     | 0     | kleiner LLOQ | #VALUE! | 1      | #VALUE! |
| 0            | T2 | A12 | 0     | 0     | kleiner LLOQ | #VALUE! | 1      | #VALUE! |
| 0            | T2 | B01 | 0     | 0     | kleiner LLOQ | #VALUE! | 1      | #VALUE! |
| 0            | T2 | B02 | 0     | 0     | kleiner LLOQ | #VALUE! | 1      | #VALUE! |
| 0            | T2 | B03 | 0     | 0     | kleiner LLOQ | #VALUE! | 1      | #VALUE! |
| 0            | T2 | B04 | 0     | 0     | kleiner LLOQ | #VALUE! | 1      | #VALUE! |
| 0            | T2 | B05 | 0     | 0     | kleiner LLOQ | #VALUE! | 1      | #VALUE! |
| 0            | T2 | B06 | 0     | 0     | kleiner LLOQ | #VALUE! | 1      | #VALUE! |
| 0            | T2 | B07 | 0     | 0     | kleiner LLOQ | #VALUE! | 1      | #VALUE! |
| 0            | T2 | B08 | 0     | 0     | kleiner LLOQ | #VALUE! | 1      | #VALUE! |
| 0            | T2 | B09 | 0     | 0     | kleiner LLOQ | #VALUE! | 1      | #VALUE! |
| 0            | T2 | B10 | 0     | 0     | kleiner LLOQ | #VALUE! | 1      | #VALUE! |
| 0            | T2 | B11 | 0     | 0     | kleiner LLOQ | #VALUE! | 1      | #VALUE! |
| 0            | T2 | B12 | 0     | 0     | kleiner LLOQ | #VALUE! | 1      | #VALUE! |

Plate: T2

|   | 1     | 2     | 3     | 4     | 5     | 6     | 7     | 8     | 9     | 10    | 11    | 12    |
|---|-------|-------|-------|-------|-------|-------|-------|-------|-------|-------|-------|-------|
| A |       |       |       |       |       |       |       |       |       |       |       |       |
| B |       |       |       |       |       |       |       |       |       |       |       |       |
| C |       |       |       |       |       |       |       |       |       |       |       |       |
| D |       |       |       |       |       |       |       |       |       |       |       |       |
| E |       |       |       |       |       |       |       |       |       |       |       |       |
| F |       |       |       |       |       |       |       |       |       |       |       |       |
| G |       |       |       |       | 0.606 | 0.608 |       |       |       |       |       |       |
| H | 0.503 | 0.559 | 0.312 | 0.313 | 0.298 | 0.250 | 0.052 | 0.053 | 0.053 | 0.053 | 0.052 | 0.052 |

Plattenbelegung

|   | 1 | 2 | 3 | 4 | 5 | 6 | 7 | 8 | 9 | 10 | 11 | 12 |
|---|---|---|---|---|---|---|---|---|---|----|----|----|
| A |   |   |   |   |   |   |   |   |   |    |    |    |
| B |   |   |   |   |   |   |   |   |   |    |    |    |
| C |   |   |   |   |   |   |   |   |   |    |    |    |
| D |   |   |   |   |   |   |   |   |   |    |    |    |

|              |    |     |       |       |              |         |       |         |       |        |        |        |        |       |        |              |              |              |              |              |              |           |
|--------------|----|-----|-------|-------|--------------|---------|-------|---------|-------|--------|--------|--------|--------|-------|--------|--------------|--------------|--------------|--------------|--------------|--------------|-----------|
| 0            | T2 | C01 | 0     | 0     | kleiner LLOQ | #VALUE! | 1     | #VALUE! | E     |        |        |        |        |       | T2SS12 | T2SS12       | T2SS13       | T2SS13       |              |              |              |           |
| 0            | T2 | C02 | 0     | 0     | kleiner LLOQ | #VALUE! | 1     | #VALUE! | F     |        |        |        |        |       | T2SS21 | T2SS21       |              |              |              |              |              |           |
| 0            | T2 | C03 | 0     | 0     | kleiner LLOQ | #VALUE! | 1     | #VALUE! | G     |        |        |        |        |       | T2SS11 | T2SS11       | T2SS22       | T2SS22       | Blank PEG    | Blank PEG    | Blank PEG    | Blank PEG |
| 0            | T2 | C04 | 0     | 0     | kleiner LLOQ | #VALUE! | 1     | #VALUE! | H     | T2SS23 | T2SS23 | T2SS24 | T2SS24 | T2SN2 | T2SN2  | Blank no PEG | Blank no PEG | Blank no PEG | Blank no PEG | Blank no PEG | Blank no PEG |           |
| 0            | T2 | C05 | 0     | 0     | kleiner LLOQ | #VALUE! | 1     | #VALUE! |       |        |        |        |        |       |        |              |              |              |              |              |              |           |
| 0            | T2 | C06 | 0     | 0     | kleiner LLOQ | #VALUE! | 1     | #VALUE! |       |        |        |        |        |       |        |              |              |              |              |              |              |           |
| 0            | T2 | C07 | 0     | 0     | kleiner LLOQ | #VALUE! | 1     | #VALUE! |       |        |        |        |        |       |        |              |              |              |              |              |              |           |
| 0            | T2 | C08 | 0     | 0     | kleiner LLOQ | #VALUE! | 1     | #VALUE! |       |        |        |        |        |       |        |              |              |              |              |              |              |           |
| 0            | T2 | C09 | 0     | 0     | kleiner LLOQ | #VALUE! | 1     | #VALUE! |       |        |        |        |        |       |        |              |              |              |              |              |              |           |
| 0            | T2 | C10 | 0     | 0     | kleiner LLOQ | #VALUE! | 1     | #VALUE! |       |        |        |        |        |       |        |              |              |              |              |              |              |           |
| 0            | T2 | C11 | 0     | 0     | kleiner LLOQ | #VALUE! | 1     | #VALUE! |       |        |        |        |        |       |        |              |              |              |              |              |              |           |
| 0            | T2 | C12 | 0     | 0     | kleiner LLOQ | #VALUE! | 1     | #VALUE! |       |        |        |        |        |       |        |              |              |              |              |              |              |           |
| 0            | T2 | D01 | 0     | 0     | kleiner LLOQ | #VALUE! | 1     | #VALUE! |       |        |        |        |        |       |        |              |              |              |              |              |              |           |
| 0            | T2 | D02 | 0     | 0     | kleiner LLOQ | #VALUE! | 1     | #VALUE! |       |        |        |        |        |       |        |              |              |              |              |              |              |           |
| 0            | T2 | D03 | 0     | 0     | kleiner LLOQ | #VALUE! | 1     | #VALUE! |       |        |        |        |        |       |        |              |              |              |              |              |              |           |
| 0            | T2 | D04 | 0     | 0     | kleiner LLOQ | #VALUE! | 1     | #VALUE! |       |        |        |        |        |       |        |              |              |              |              |              |              |           |
| 0            | T2 | D05 | 0     | 0     | kleiner LLOQ | #VALUE! | 1     | #VALUE! |       |        |        |        |        |       |        |              |              |              |              |              |              |           |
| 0            | T2 | D06 | 0     | 0     | kleiner LLOQ | #VALUE! | 1     | #VALUE! |       |        |        |        |        |       |        |              |              |              |              |              |              |           |
| 0            | T2 | D07 | 0     | 0     | kleiner LLOQ | #VALUE! | 1     | #VALUE! |       |        |        |        |        |       |        |              |              |              |              |              |              |           |
| 0            | T2 | D08 | 0     | 0     | kleiner LLOQ | #VALUE! | 1     | #VALUE! |       |        |        |        |        |       |        |              |              |              |              |              |              |           |
| 0            | T2 | D09 | 0     | 0     | kleiner LLOQ | #VALUE! | 1     | #VALUE! |       |        |        |        |        |       |        |              |              |              |              |              |              |           |
| 0            | T2 | D10 | 0     | 0     | kleiner LLOQ | #VALUE! | 1     | #VALUE! |       |        |        |        |        |       |        |              |              |              |              |              |              |           |
| 0            | T2 | D11 | 0     | 0     | kleiner LLOQ | #VALUE! | 1     | #VALUE! |       |        |        |        |        |       |        |              |              |              |              |              |              |           |
| 0            | T2 | D12 | 0     | 0     | kleiner LLOQ | #VALUE! | 1     | #VALUE! |       |        |        |        |        |       |        |              |              |              |              |              |              |           |
| 0            | T2 | E01 | 0     | 0     | kleiner LLOQ | #VALUE! | 1     | #VALUE! |       |        |        |        |        |       |        |              |              |              |              |              |              |           |
| 0            | T2 | E02 | 0     | 0     | kleiner LLOQ | #VALUE! | 1     | #VALUE! |       |        |        |        |        |       |        |              |              |              |              |              |              |           |
| 0            | T2 | E03 | 0     | 0     | kleiner LLOQ | #VALUE! | 1     | #VALUE! |       |        |        |        |        |       |        |              |              |              |              |              |              |           |
| 0            | T2 | E04 | 0     | 0     | kleiner LLOQ | #VALUE! | 1     | #VALUE! |       |        |        |        |        |       |        |              |              |              |              |              |              |           |
| 0            | T2 | E05 | 0     | 0     | kleiner LLOQ | #VALUE! | 1     | #VALUE! |       |        |        |        |        |       |        |              |              |              |              |              |              |           |
| 0            | T2 | E06 | 0     | 0     | kleiner LLOQ | #VALUE! | 1     | #VALUE! |       |        |        |        |        |       |        |              |              |              |              |              |              |           |
| T2SS12       | T2 | E07 | 0.574 | 0.523 | 0.523        | 0.523   | 0.023 | 22      | 0.512 |        |        |        |        |       |        |              |              |              |              |              |              |           |
| T2SS12       | T2 | E08 | 0.573 | 0.522 | 0.522        | 0.522   | 0.023 | 22      | 0.511 |        |        |        |        |       |        |              |              |              |              |              |              |           |
| T2SS13       | T2 | E09 | 0.572 | 0.522 | 0.522        | 0.522   | 0.023 | 22      | 0.510 |        |        |        |        |       |        |              |              |              |              |              |              |           |
| T2SS13       | T2 | E10 | 0.589 | 0.538 | 0.538        | 0.538   | 0.024 | 22      | 0.527 |        |        |        |        |       |        |              |              |              |              |              |              |           |
| 0            | T2 | E11 | 0     | 0     | kleiner LLOQ | #VALUE! | 1     | #VALUE! |       |        |        |        |        |       |        |              |              |              |              |              |              |           |
| 0            | T2 | E12 | 0     | 0     | kleiner LLOQ | #VALUE! | 1     | #VALUE! |       |        |        |        |        |       |        |              |              |              |              |              |              |           |
| 0            | T2 | F01 | 0     | 0     | kleiner LLOQ | #VALUE! | 1     | #VALUE! |       |        |        |        |        |       |        |              |              |              |              |              |              |           |
| 0            | T2 | F02 | 0     | 0     | kleiner LLOQ | #VALUE! | 1     | #VALUE! |       |        |        |        |        |       |        |              |              |              |              |              |              |           |
| 0            | T2 | F03 | 0     | 0     | kleiner LLOQ | #VALUE! | 1     | #VALUE! |       |        |        |        |        |       |        |              |              |              |              |              |              |           |
| 0            | T2 | F04 | 0     | 0     | kleiner LLOQ | #VALUE! | 1     | #VALUE! |       |        |        |        |        |       |        |              |              |              |              |              |              |           |
| T2SS21       | T2 | F05 | 0.608 | 0.556 | 0.556        | 0.556   | 0.025 | 22      | 0.546 |        |        |        |        |       |        |              |              |              |              |              |              |           |
| T2SS21       | T2 | F06 | 0.608 | 0.557 | 0.557        | 0.557   | 0.025 | 22      | 0.547 |        |        |        |        |       |        |              |              |              |              |              |              |           |
| 0            | T2 | F07 | 0     | 0     | kleiner LLOQ | #VALUE! | 1     | #VALUE! |       |        |        |        |        |       |        |              |              |              |              |              |              |           |
| 0            | T2 | F08 | 0     | 0     | kleiner LLOQ | #VALUE! | 1     | #VALUE! |       |        |        |        |        |       |        |              |              |              |              |              |              |           |
| 0            | T2 | F09 | 0     | 0     | kleiner LLOQ | #VALUE! | 1     | #VALUE! |       |        |        |        |        |       |        |              |              |              |              |              |              |           |
| 0            | T2 | F10 | 0     | 0     | kleiner LLOQ | #VALUE! | 1     | #VALUE! |       |        |        |        |        |       |        |              |              |              |              |              |              |           |
| 0            | T2 | F11 | 0     | 0     | kleiner LLOQ | #VALUE! | 1     | #VALUE! |       |        |        |        |        |       |        |              |              |              |              |              |              |           |
| 0            | T2 | F12 | 0     | 0     | kleiner LLOQ | #VALUE! | 1     | #VALUE! |       |        |        |        |        |       |        |              |              |              |              |              |              |           |
| 0            | T2 | G01 | 0     | 0     | kleiner LLOQ | #VALUE! | 1     | #VALUE! |       |        |        |        |        |       |        |              |              |              |              |              |              |           |
| 0            | T2 | G02 | 0     | 0     | kleiner LLOQ | #VALUE! | 1     | #VALUE! |       |        |        |        |        |       |        |              |              |              |              |              |              |           |
| T2SS11       | T2 | G03 | 0.511 | 0.460 | 0.460        | 0.460   | 0.020 | 16.5    | 0.334 |        |        |        |        |       |        |              |              |              |              |              |              |           |
| T2SS11       | T2 | G04 | 0.494 | 0.443 | 0.443        | 0.443   | 0.019 | 16.5    | 0.321 |        |        |        |        |       |        |              |              |              |              |              |              |           |
| T2SS22       | T2 | G05 | 0.744 | 0.694 | 0.694        | 0.694   | 0.031 | 16.5    | 0.517 |        |        |        |        |       |        |              |              |              |              |              |              |           |
| T2SS22       | T2 | G06 | 0.774 | 0.723 | 0.723        | 0.723   | 0.033 | 16.5    | 0.541 |        |        |        |        |       |        |              |              |              |              |              |              |           |
| Blank PEG    | T2 | G07 | 0     | 0     | kleiner LLOQ | #VALUE! | 2.75  | #VALUE! |       |        |        |        |        |       |        |              |              |              |              |              |              |           |
| Blank PEG    | T2 | G08 | 0     | 0     | kleiner LLOQ | #VALUE! | 2.75  | #VALUE! |       |        |        |        |        |       |        |              |              |              |              |              |              |           |
| Blank PEG    | T2 | G09 | 0     | 0     | kleiner LLOQ | #VALUE! | 2.75  | #VALUE! |       |        |        |        |        |       |        |              |              |              |              |              |              |           |
| Blank PEG    | T2 | G10 | 0     | 0     | kleiner LLOQ | #VALUE! | 2.75  | #VALUE! |       |        |        |        |        |       |        |              |              |              |              |              |              |           |
| Blank PEG    | T2 | G11 | 0     | 0     | kleiner LLOQ | #VALUE! | 2.75  | #VALUE! |       |        |        |        |        |       |        |              |              |              |              |              |              |           |
| Blank PEG    | T2 | G12 | 0     | 0     | kleiner LLOQ | #VALUE! | 2.75  | #VALUE! |       |        |        |        |        |       |        |              |              |              |              |              |              |           |
| T2SS23       | T2 | H01 | 0.503 | 0.452 | 0.452        | 0.452   | 0.020 | 16.5    | 0.328 |        |        |        |        |       |        |              |              |              |              |              |              |           |
| T2SS23       | T2 | H02 | 0.559 | 0.508 | 0.508        | 0.508   | 0.023 | 16.5    | 0.372 |        |        |        |        |       |        |              |              |              |              |              |              |           |
| T2SS24       | T2 | H03 | 0.312 | 0.261 | 0.261        | 0.261   | 0.011 | 16.5    | 0.178 |        |        |        |        |       |        |              |              |              |              |              |              |           |
| T2SS24       | T2 | H04 | 0.313 | 0.262 | 0.262        | 0.262   | 0.011 | 16.5    | 0.179 |        |        |        |        |       |        |              |              |              |              |              |              |           |
| T2SN2        | T2 | H05 | 0     | 0     | 0            | 0       | 0.01  | 22      | 0.223 |        |        |        |        |       |        |              |              |              |              |              |              |           |
| T2SN2        | T2 | H06 | 0     | 0     | 0            | 0       | 0.01  | 22      | 0.173 |        |        |        |        |       |        |              |              |              |              |              |              |           |
| Blank no PEG | T2 | H07 | 0     | 0     | kleiner LLOQ | #VALUE! | 2.75  | #VALUE! |       |        |        |        |        |       |        |              |              |              |              |              |              |           |
| Blank no PEG | T2 | H08 | 0     | 0     | kleiner LLOQ | #VALUE! | 2.75  | #VALUE! |       |        |        |        |        |       |        |              |              |              |              |              |              |           |
| Blank no PEG | T2 | H09 | 0     | 0     | kleiner LLOQ | #VALUE! | 2.75  | #VALUE! |       |        |        |        |        |       |        |              |              |              |              |              |              |           |
| Blank no PEG | T2 | H10 | 0     | 0     | kleiner LLOQ | #VALUE! | 2.75  | #VALUE! |       |        |        |        |        |       |        |              |              |              |              |              |              |           |
| Blank no PEG | T2 | H11 | 0     | 0     | kleiner LLOQ | #VALUE! | 2.75  | #VALUE! |       |        |        |        |        |       |        |              |              |              |              |              |              |           |
| Blank no PEG | T2 | H12 | 0     | 0     | kleiner LLOQ | #VALUE! | 2.75  | #VALUE! |       |        |        |        |        |       |        |              |              |              |              |              |              |           |
| 0            | T3 | A01 | 0     | 0     | kleiner LLOQ | #VALUE! | 1     | #VALUE! |       |        |        |        |        |       |        |              |              |              |              |              |              |           |
| 0            | T3 | A02 | 0     | 0     | kleiner LLOQ | #VALUE! | 1     | #VALUE! |       |        |        |        |        |       |        |              |              |              |              |              |              |           |
| 0            | T3 | A03 | 0     | 0     | kleiner LLOQ | #VALUE! | 1     | #VALUE! |       |        |        |        |        |       |        |              |              |              |              |              |              |           |

Comment:

Date Operator

Date Control

|        |    |     |       |       |              |         |       |         |
|--------|----|-----|-------|-------|--------------|---------|-------|---------|
| 0      | T3 | A04 | 0     | 0     | kleiner LLOQ | #VALUE! | 1     | #VALUE! |
| 0      | T3 | A05 | 0     | 0     | kleiner LLOQ | #VALUE! | 1     | #VALUE! |
| 0      | T3 | A06 | 0     | 0     | kleiner LLOQ | #VALUE! | 1     | #VALUE! |
| 0      | T3 | A07 | 0     | 0     | kleiner LLOQ | #VALUE! | 1     | #VALUE! |
| 0      | T3 | A08 | 0     | 0     | kleiner LLOQ | #VALUE! | 1     | #VALUE! |
| 0      | T3 | A09 | 0     | 0     | kleiner LLOQ | #VALUE! | 1     | #VALUE! |
| 0      | T3 | A10 | 0     | 0     | kleiner LLOQ | #VALUE! | 1     | #VALUE! |
| 0      | T3 | A11 | 0     | 0     | kleiner LLOQ | #VALUE! | 1     | #VALUE! |
| 0      | T3 | A12 | 0     | 0     | kleiner LLOQ | #VALUE! | 1     | #VALUE! |
| 0      | T3 | B01 | 0     | 0     | kleiner LLOQ | #VALUE! | 1     | #VALUE! |
| 0      | T3 | B02 | 0     | 0     | kleiner LLOQ | #VALUE! | 1     | #VALUE! |
| 0      | T3 | B03 | 0     | 0     | kleiner LLOQ | #VALUE! | 1     | #VALUE! |
| 0      | T3 | B04 | 0     | 0     | kleiner LLOQ | #VALUE! | 1     | #VALUE! |
| 0      | T3 | B05 | 0     | 0     | kleiner LLOQ | #VALUE! | 1     | #VALUE! |
| 0      | T3 | B06 | 0     | 0     | kleiner LLOQ | #VALUE! | 1     | #VALUE! |
| 0      | T3 | B07 | 0     | 0     | kleiner LLOQ | #VALUE! | 1     | #VALUE! |
| 0      | T3 | B08 | 0     | 0     | kleiner LLOQ | #VALUE! | 1     | #VALUE! |
| 0      | T3 | B09 | 0     | 0     | kleiner LLOQ | #VALUE! | 1     | #VALUE! |
| 0      | T3 | B10 | 0     | 0     | kleiner LLOQ | #VALUE! | 1     | #VALUE! |
| 0      | T3 | B11 | 0     | 0     | kleiner LLOQ | #VALUE! | 1     | #VALUE! |
| 0      | T3 | B12 | 0     | 0     | kleiner LLOQ | #VALUE! | 1     | #VALUE! |
| 0      | T3 | C01 | 0     | 0     | kleiner LLOQ | #VALUE! | 1     | #VALUE! |
| 0      | T3 | C02 | 0     | 0     | kleiner LLOQ | #VALUE! | 1     | #VALUE! |
| 0      | T3 | C03 | 0     | 0     | kleiner LLOQ | #VALUE! | 1     | #VALUE! |
| 0      | T3 | C04 | 0     | 0     | kleiner LLOQ | #VALUE! | 1     | #VALUE! |
| 0      | T3 | C05 | 0     | 0     | kleiner LLOQ | #VALUE! | 1     | #VALUE! |
| 0      | T3 | C06 | 0     | 0     | kleiner LLOQ | #VALUE! | 1     | #VALUE! |
| 0      | T3 | C07 | 0     | 0     | kleiner LLOQ | #VALUE! | 1     | #VALUE! |
| 0      | T3 | C08 | 0     | 0     | kleiner LLOQ | #VALUE! | 1     | #VALUE! |
| 0      | T3 | C09 | 0     | 0     | kleiner LLOQ | #VALUE! | 1     | #VALUE! |
| 0      | T3 | C10 | 0     | 0     | kleiner LLOQ | #VALUE! | 1     | #VALUE! |
| 0      | T3 | C11 | 0     | 0     | kleiner LLOQ | #VALUE! | 1     | #VALUE! |
| 0      | T3 | C12 | 0     | 0     | kleiner LLOQ | #VALUE! | 1     | #VALUE! |
| 0      | T3 | D01 | 0     | 0     | kleiner LLOQ | #VALUE! | 1     | #VALUE! |
| 0      | T3 | D02 | 0     | 0     | kleiner LLOQ | #VALUE! | 1     | #VALUE! |
| 0      | T3 | D03 | 0     | 0     | kleiner LLOQ | #VALUE! | 1     | #VALUE! |
| 0      | T3 | D04 | 0     | 0     | kleiner LLOQ | #VALUE! | 1     | #VALUE! |
| 0      | T3 | D05 | 0     | 0     | kleiner LLOQ | #VALUE! | 1     | #VALUE! |
| 0      | T3 | D06 | 0     | 0     | kleiner LLOQ | #VALUE! | 1     | #VALUE! |
| T3SN2  | T3 | D07 | 0.410 | 0.359 | 0.359        | 0.015   | 24.75 | 0.383   |
| T3SN2  | T3 | D08 | 0.080 | 0.029 | 0.029        | 0.008   | 24.75 | 0.172   |
| T3SN3  | T3 | D09 | 0.262 | 0.211 | 0.211        | 0.008   | 24.75 | 0.208   |
| T3SN3  | T3 | D10 | 0.231 | 0.180 | 0.180        | 0.007   | 24.75 | 0.172   |
| T3SN4  | T3 | D11 | 0.503 | 0.452 | 0.452        | 0.020   | 11    | 0.219   |
| T3SN4  | T3 | D12 | 0.547 | 0.496 | 0.496        | 0.022   | 11    | 0.242   |
| 0      | T3 | E01 | 0     | 0     | kleiner LLOQ | #VALUE! | 1     | #VALUE! |
| 0      | T3 | E02 | 0     | 0     | kleiner LLOQ | #VALUE! | 1     | #VALUE! |
| 0      | T3 | E03 | 0     | 0     | kleiner LLOQ | #VALUE! | 1     | #VALUE! |
| 0      | T3 | E04 | 0     | 0     | kleiner LLOQ | #VALUE! | 1     | #VALUE! |
| T3SS11 | T3 | E05 | 0.557 | 0.506 | 0.506        | 0.022   | 11    | 0.247   |
| T3SS11 | T3 | E06 | 0.530 | 0.479 | 0.479        | 0.021   | 11    | 0.233   |
| T3SS12 | T3 | E07 | 0.621 | 0.570 | 0.570        | 0.025   | 24.75 | 0.631   |
| T3SS12 | T3 | E08 | 0.561 | 0.510 | 0.510        | 0.023   | 24.75 | 0.560   |
| T3SS13 | T3 | E09 | 0.682 | 0.631 | 0.631        | 0.028   | 11    | 0.312   |
| T3SS13 | T3 | E10 | 0.634 | 0.584 | 0.584        | 0.026   | 11    | 0.287   |
| T3SS14 | T3 | E11 | 0.414 | 0.363 | 0.363        | 0.016   | 11    | 0.172   |
| T3SS14 | T3 | E12 | 0.402 | 0.351 | 0.351        | 0.015   | 11    | 0.166   |
| 0      | T3 | F01 | 0     | 0     | kleiner LLOQ | #VALUE! | 1     | #VALUE! |
| 0      | T3 | F02 | 0     | 0     | kleiner LLOQ | #VALUE! | 1     | #VALUE! |
| 0      | T3 | F03 | 0     | 0     | kleiner LLOQ | #VALUE! | 1     | #VALUE! |
| 0      | T3 | F04 | 0     | 0     | kleiner LLOQ | #VALUE! | 1     | #VALUE! |
| T3SS21 | T3 | F05 | 0.475 | 0.424 | 0.424        | 0.019   | 11    | 0.204   |
| T3SS21 | T3 | F06 | 0.468 | 0.417 | 0.417        | 0.018   | 11    | 0.200   |
| T3SS22 | T3 | F07 | 0.368 | 0.317 | 0.317        | 0.013   | 11    | 0.148   |
| T3SS22 | T3 | F08 | 0.400 | 0.349 | 0.349        | 0.015   | 11    | 0.165   |
| T3SS23 | T3 | F09 | 0     | 0     | kleiner LLOQ | #VALUE! | 1     | #VALUE! |
| T3SS23 | T3 | F10 | 0     | 0     | kleiner LLOQ | #VALUE! | 1     | #VALUE! |
| T3SS24 | T3 | F11 | 0     | 0     | kleiner LLOQ | #VALUE! | 1     | #VALUE! |
| T3SS24 | T3 | F12 | 0     | 0     | kleiner LLOQ | #VALUE! | 1     | #VALUE! |
| 0      | T3 | G01 | 0     | 0     | kleiner LLOQ | #VALUE! | 1     | #VALUE! |
| 0      | T3 | G02 | 0     | 0     | kleiner LLOQ | #VALUE! | 1     | #VALUE! |
| 0      | T3 | G03 | 0     | 0     | kleiner LLOQ | #VALUE! | 1     | #VALUE! |
| 0      | T3 | G04 | 0     | 0     | kleiner LLOQ | #VALUE! | 1     | #VALUE! |

Plate: T3

|   | 1 | 2 | 3 | 4 | 5     | 6     | 7     | 8     | 9     | 10    | 11    | 12    |       |
|---|---|---|---|---|-------|-------|-------|-------|-------|-------|-------|-------|-------|
| A |   |   |   |   |       |       |       |       |       |       |       |       |       |
| B |   |   |   |   |       |       |       |       |       |       |       |       |       |
| C |   |   |   |   |       |       |       |       |       |       |       |       |       |
| D |   |   |   |   |       |       |       | 0.410 | 0.080 | 0.262 | 0.231 | 0.503 | 0.547 |
| E |   |   |   |   |       |       |       |       |       |       |       |       |       |
| F |   |   |   |   | 0.557 | 0.530 | 0.621 | 0.561 | 0.682 | 0.634 | 0.414 | 0.402 |       |
| G |   |   |   |   | 0.475 | 0.468 | 0.368 | 0.400 |       |       |       |       |       |
| H |   |   |   |   |       |       |       | 0.052 | 0.048 | 0.052 | 0.052 | 0.047 | 0.046 |
|   |   |   |   |   |       |       |       | 0.051 | 0.060 | 0.059 | 0.054 | 0.055 | 0.055 |

Plattenbelegung

|   | 1 | 2 | 3 | 4 | 5      | 6      | 7            | 8            | 9            | 10           | 11           | 12           |
|---|---|---|---|---|--------|--------|--------------|--------------|--------------|--------------|--------------|--------------|
| A |   |   |   |   |        |        |              |              |              |              |              |              |
| B |   |   |   |   |        |        |              |              |              |              |              |              |
| C |   |   |   |   |        |        |              |              |              |              |              |              |
| D |   |   |   |   |        |        |              |              |              |              |              |              |
| E |   |   |   |   |        |        |              |              |              |              |              |              |
| F |   |   |   |   | T3SS11 | T3SS11 | T3SN2        | T3SN2        | T3SN3        | T3SN3        | T3SN4        | T3SN4        |
| G |   |   |   |   | T3SS21 | T3SS21 | T3SS12       | T3SS12       | T3SS13       | T3SS13       | T3SS14       | T3SS14       |
| H |   |   |   |   |        |        | Blank PEG    | Blank PEG    | Blank PEG    | Blank PEG    | Blank PEG    | Blank PEG    |
|   |   |   |   |   |        |        | Blank no PEG | Blank no PEG | Blank no PEG | Blank no PEG | Blank no PEG | Blank no PEG |

dil9\*dil2,75=24,75  
dil4\*dil2,75=dil11

Comment:

Date Operator

Date Control

|              |    |     |   |   |              |         |      |         |
|--------------|----|-----|---|---|--------------|---------|------|---------|
| 0            | T3 | G05 | 0 | 0 | kleiner LLOQ | #VALUE! | 1    | #VALUE! |
| 0            | T3 | G06 | 0 | 0 | kleiner LLOQ | #VALUE! | 1    | #VALUE! |
| Blank PEG    | T3 | G07 | 0 | 0 | kleiner LLOQ | #VALUE! | 2.75 | #VALUE! |
| Blank PEG    | T3 | G08 | 0 | 0 | kleiner LLOQ | #VALUE! | 2.75 | #VALUE! |
| Blank PEG    | T3 | G09 | 0 | 0 | kleiner LLOQ | #VALUE! | 2.75 | #VALUE! |
| Blank PEG    | T3 | G10 | 0 | 0 | kleiner LLOQ | #VALUE! | 2.75 | #VALUE! |
| Blank PEG    | T3 | G11 | 0 | 0 | kleiner LLOQ | #VALUE! | 2.75 | #VALUE! |
| Blank PEG    | T3 | G12 | 0 | 0 | kleiner LLOQ | #VALUE! | 2.75 | #VALUE! |
| 0            | T3 | H01 | 0 | 0 | kleiner LLOQ | #VALUE! | 1    | #VALUE! |
| 0            | T3 | H02 | 0 | 0 | kleiner LLOQ | #VALUE! | 1    | #VALUE! |
| 0            | T3 | H03 | 0 | 0 | kleiner LLOQ | #VALUE! | 1    | #VALUE! |
| 0            | T3 | H04 | 0 | 0 | kleiner LLOQ | #VALUE! | 1    | #VALUE! |
| 0            | T3 | H05 | 0 | 0 | kleiner LLOQ | #VALUE! | 1    | #VALUE! |
| 0            | T3 | H06 | 0 | 0 | kleiner LLOQ | #VALUE! | 1    | #VALUE! |
| Blank no PEG | T3 | H07 | 0 | 0 | kleiner LLOQ | #VALUE! | 2.75 | #VALUE! |
| Blank no PEG | T3 | H08 | 0 | 0 | kleiner LLOQ | #VALUE! | 2.75 | #VALUE! |
| Blank no PEG | T3 | H09 | 0 | 0 | kleiner LLOQ | #VALUE! | 2.75 | #VALUE! |
| Blank no PEG | T3 | H10 | 0 | 0 | kleiner LLOQ | #VALUE! | 2.75 | #VALUE! |
| Blank no PEG | T3 | H11 | 0 | 0 | kleiner LLOQ | #VALUE! | 2.75 | #VALUE! |
| Blank no PEG | T3 | H12 | 0 | 0 | kleiner LLOQ | #VALUE! | 2.75 | #VALUE! |



|                    |              |                            |                         |                         |                              |
|--------------------|--------------|----------------------------|-------------------------|-------------------------|------------------------------|
| Project number     | F-120        | Apparatus                  | Wallac Victor           | Operator                | IsBa                         |
| GLP Study (Number) | n.a.         | Protocol (Instrument meth) | LDH test 2016           | Date of preparation     | 19-04-18                     |
| hot substance      | isotope      | n.a.                       | File name (results)     | IsBa_180419/20_LDH_full | Date of measurement          |
|                    | name         | n.a.                       | Kind of well plate      | 96 well                 | shaking time [min]           |
| cold substance     | ACB-ID       | n.a.                       | sample volume [µL]      | 100                     | stirring rate (Target) [rpm] |
|                    | Batch number | n.a.                       | Cocktail volume [µL]    | 175                     | Kind of measurement          |
| n.a.               | name         | LDH                        | ACB-ID of cocktail      |                         | Wave length [nm]             |
|                    | ACB-ID       | L23982R                    | Matrix                  | DMEM (from powder)+PE   | Remarks                      |
| n.a.               | Batch number | SLBK6345V                  | Blank description       | DMEM/PEG, H2O           | Remarks                      |
|                    |              |                            | Pipettes (No. / volume) | 50-200µl                | Remarks                      |
| n.a.               | n.a.         | Pipettes (No. / volume)    | n.a.                    | Remarks                 | n.a.                         |

Messdaten (diese Tabelle in Bericht übernehmen)

| Sample name * | concentration (theor.) * | measured data | measured data | measured data | mean measured | SD   | RSD  | Blank * | measured data after * | concentration (calc.) * | Deviation * | Residuen |
|---------------|--------------------------|---------------|---------------|---------------|---------------|------|------|---------|-----------------------|-------------------------|-------------|----------|
|               | [µg/mL]                  | [AU]          | [AU]          | [AU]          | [AU]          | [AU] | [%]  | [AU]    | Blank subtraction     | [µg/mL]                 | [%]         |          |
| KLP1          | 0.148                    | 1.579         | 1.652         | 1.627         | 1.62          | 0.03 | 1.87 | 0.047   | 1.568                 | 0.148                   | -0.24       | 0.00     |
| KLP2          | 0.114                    | 1.357         | 1.443         | 1.372         | 1.39          | 0.04 | 2.70 | 0.054   | 1.340                 | 0.110                   | -3.40       | 0.00     |
| KLP3          | 0.074                    | 1.272         | 1.193         | 1.228         | 1.23          | 0.03 | 2.63 | 0.051   | 1.180                 | 0.084                   | 13.04       | 0.01     |
| KLP4          | 0.041                    | 0.959         | 0.972         | 0.883         | 0.94          | 0.04 | 4.19 | 0.051   | 0.887                 | 0.035                   | -13.32      | -0.01    |
| KLP5          |                          |               |               |               |               |      |      | 0.052   |                       |                         |             |          |
| KLP6          |                          |               |               |               |               |      |      | 0.051   |                       |                         |             |          |
| KLP7          |                          |               |               |               |               |      |      |         |                       |                         |             |          |
| KLP8          |                          |               |               |               |               |      |      |         |                       |                         |             |          |

Statistical data

|                                              |                                          |                     |             |
|----------------------------------------------|------------------------------------------|---------------------|-------------|
| Geradensteigung                              | Slope                                    | m                   | 6.05        |
| Y-Achsenabschnitt                            | Y-intercept                              | b                   | 0.67        |
| Standardabw. Geradensteigung                 | SD-Slope                                 | S <sub>m</sub>      | 0.620291227 |
| Standardabw. Achsenabschnittes               | SD-Y-Intercept                           | S <sub>b</sub>      | 0.063894294 |
| Anzahl Messpunkte                            | number of measuring points               | n                   | 4           |
| Quadratsumme                                 | sum of squares                           | Q <sub>xx</sub>     | 0.006578604 |
| Bereichsmittle                               |                                          | f                   | 0.094336926 |
| Freiheitsgrade                               | degree of freedom                        | f                   | 2           |
| Student-t-Faktor für (P = 95 %; f = n-2)     | Student-t-factor for (P = 95 %; f = n-2) | t                   | 4.303       |
| Vertrauensbereich Steig. (95 %) Obergrenze   |                                          | m + VB <sub>m</sub> | 8.722319627 |
| Vertrauensbereich Steig. (95 %) Untergrenze  |                                          | m - VB <sub>m</sub> | 3.384093228 |
| Vertrauensbereich Achsenabschnitt (95 %) Og. |                                          | b + VB <sub>b</sub> | 0.946914615 |
| Vertrauensbereich Achsenabschnitt (95 %) Ug. |                                          | b - VB <sub>b</sub> | 0.398761518 |
| Korrelationskoeffizient                      | correlation coefficient                  | r                   | 0.9897      |
| Bestimmtheitsmaß                             | determination coefficient                | r <sup>2</sup>      | 0.9794      |
| Reststandardabweichung                       |                                          | S <sub>0</sub>      | 0.050310948 |
| Summe Restquadrat                            |                                          | sd                  | 2.895683345 |
| Verfahrensstandardabw.                       |                                          | S <sub>0p</sub>     | 0.008311454 |
| Rel. Verfahrensstandardabw. %                |                                          | V <sub>0p</sub>     | 8.810393374 |

|                          |       |
|--------------------------|-------|
| mean Blank               | 0     |
| SD Blank                 | 0.00  |
| RSD Blank                | 3.79  |
| x <sup>2</sup> SD (LLOQ) | 0     |
| x <sup>2</sup> SD (LOD)  | 0     |
| LLOQ (AU)                | 0     |
| LOD (AU)                 | 0     |
| LLOQ                     | 1.568 |
| LLOQ (Lin)               | 0.887 |

Evaluation / Comment

LDH linearity valid with 7 standards, split in lin high and lin low, each with 4 standards and KLP4 common standard for both. R<sup>2</sup> 0,9981, deviations for both between -13.34% and +13.04%

Date

Operator

Date

Control

|               |  |         |               |
|---------------|--|---------|---------------|
| Formblatt-Nr. |  | Version |               |
| Titel         |  |         |               |
| Gültig ab     |  | Ablage  | Projektordner |

Figure 1 Linearity



Figure 2 Method validation Residuen Plot

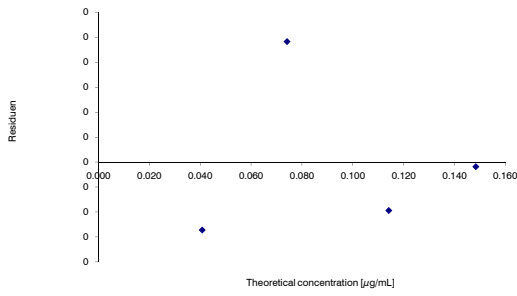

Evaluation / Comment

lin passed

Date

Operator

Date

Control

| Sample name | Plate | Position | [AU]  | [AU]-Blank | Rating       | [µg/mL] | Dilution factor | [µg/mL] |
|-------------|-------|----------|-------|------------|--------------|---------|-----------------|---------|
| T04SN1      | T0    | A01      | 1.198 | 1.147      | 1.147        | 0.078   | 66              | 5.175   |
| T04SN1      | T0    | A02      | 1.291 | 1.240      | 1.240        | 0.094   | 66              | 6.184   |
| T04SN2      | T0    | A03      | 1.335 | 1.284      | 1.284        | 0.101   | 66              | 6.666   |
| T04SN2      | T0    | A04      | 1.239 | 1.188      | 1.188        | 0.085   | 66              | 5.818   |
| T04SN3      | T0    | A05      | 1.285 | 1.214      | 1.214        | 0.089   | 66              | 5.897   |
| T04SN3      | T0    | A06      | 1.305 | 1.254      | 1.254        | 0.096   | 66              | 6.332   |
| 0           | T0    | A07      | 0     | 0          | kleiner LLOQ | #VALUE! | 1               | #VALUE! |
| 0           | T0    | A08      | 0     | 0          | kleiner LLOQ | #VALUE! | 1               | #VALUE! |
| 0           | T0    | A09      | 0     | 0          | kleiner LLOQ | #VALUE! | 22              | #VALUE! |
| 0           | T0    | A10      | 0     | 0          | kleiner LLOQ | #VALUE! | 22              | #VALUE! |
| 0           | T0    | A11      | 0     | 0          | kleiner LLOQ | #VALUE! | 1               | #VALUE! |
| 0           | T0    | A12      | 0     | 0          | kleiner LLOQ | #VALUE! | 1               | #VALUE! |
| T04SS11     | T0    | B01      | 1.302 | 1.251      | 1.251        | 0.095   | 66              | 6.303   |
| T04SS11     | T0    | B02      | 1.349 | 1.298      | 1.298        | 0.103   | 66              | 6.813   |
| T04SS12     | T0    | B03      | 1.214 | 1.163      | 1.163        | 0.081   | 66              | 5.342   |
| T04SS12     | T0    | B04      | 1.161 | 1.110      | 1.110        | 0.072   | 66              | 4.769   |
| T04SS13     | T0    | B05      | 1.334 | 1.283      | 1.283        | 0.101   | 66              | 6.653   |
| T04SS13     | T0    | B06      | 1.291 | 1.240      | 1.240        | 0.094   | 66              | 6.181   |
| 0           | T0    | B07      | 0     | 0          | kleiner LLOQ | #VALUE! | 66              | #VALUE! |
| 0           | T0    | B08      | 0     | 0          | kleiner LLOQ | #VALUE! | 66              | #VALUE! |
| 0           | T0    | B09      | 0     | 0          | kleiner LLOQ | #VALUE! | 1               | #VALUE! |
| 0           | T0    | B10      | 0     | 0          | kleiner LLOQ | #VALUE! | 1               | #VALUE! |
| 0           | T0    | B11      | 0     | 0          | kleiner LLOQ | #VALUE! | 1               | #VALUE! |
| 0           | T0    | B12      | 0     | 0          | kleiner LLOQ | #VALUE! | 1               | #VALUE! |
| T04SS21     | T0    | C01      | 1.262 | 1.211      | 1.211        | 0.089   | 66              | 5.870   |
| T04SS21     | T0    | C02      | 1.442 | 1.391      | 1.391        | 0.119   | 66              | 7.826   |
| T04SS22     | T0    | C03      | 1.168 | 1.117      | 1.117        | 0.073   | 66              | 4.842   |
| T04SS22     | T0    | C04      | 1.090 | 1.039      | 1.039        | 0.060   | 66              | 3.992   |
| T04SS23     | T0    | C05      | 1.247 | 1.196      | 1.196        | 0.086   | 66              | 5.701   |
| T04SS23     | T0    | C06      | 1.062 | 1.011      | 1.011        | 0.056   | 66              | 3.683   |
| 0           | T0    | C07      | 0     | 0          | kleiner LLOQ | #VALUE! | 66              | #VALUE! |
| 0           | T0    | C08      | 0     | 0          | kleiner LLOQ | #VALUE! | 66              | #VALUE! |
| 0           | T0    | C09      | 0     | 0          | kleiner LLOQ | #VALUE! | 66              | #VALUE! |
| 0           | T0    | C10      | 0     | 0          | kleiner LLOQ | #VALUE! | 66              | #VALUE! |
| 0           | T0    | C11      | 0     | 0          | kleiner LLOQ | #VALUE! | 1               | #VALUE! |
| 0           | T0    | C12      | 0     | 0          | kleiner LLOQ | #VALUE! | 1               | #VALUE! |
| 0           | T0    | D01      | 0     | 0          | kleiner LLOQ | #VALUE! | 1               | #VALUE! |
| 0           | T0    | D02      | 0     | 0          | kleiner LLOQ | #VALUE! | 1               | #VALUE! |
| 0           | T0    | D03      | 0     | 0          | kleiner LLOQ | #VALUE! | 1               | #VALUE! |
| 0           | T0    | D04      | 0     | 0          | kleiner LLOQ | #VALUE! | 1               | #VALUE! |
| 0           | T0    | D05      | 0     | 0          | kleiner LLOQ | #VALUE! | 1               | #VALUE! |
| 0           | T0    | D06      | 0     | 0          | kleiner LLOQ | #VALUE! | 1               | #VALUE! |
| 0           | T0    | D07      | 0     | 0          | kleiner LLOQ | #VALUE! | 1               | #VALUE! |
| 0           | T0    | D08      | 0     | 0          | kleiner LLOQ | #VALUE! | 1               | #VALUE! |
| 0           | T0    | D09      | 0     | 0          | kleiner LLOQ | #VALUE! | 1               | #VALUE! |
| 0           | T0    | D10      | 0     | 0          | kleiner LLOQ | #VALUE! | 1               | #VALUE! |
| T04SN4      | T0    | D11      | 0.951 | 0.900      | 0.900        | 0.038   | 11              | 0.413   |
| T04SN4      | T0    | D12      | 0     | 0          | kleiner LLOQ | #VALUE! | 1               | #VALUE! |

Plate: T0

|   | 1     | 2     | 3     | 4     | 5     | 6     | 7     | 8     | 9     | 10    | 11    | 12    |
|---|-------|-------|-------|-------|-------|-------|-------|-------|-------|-------|-------|-------|
| A | 1.198 | 1.291 | 1.335 | 1.239 | 1.285 | 1.305 |       |       |       |       |       |       |
| B | 1.302 | 1.349 | 1.214 | 1.161 | 1.334 | 1.291 |       |       |       |       |       |       |
| C | 1.262 | 1.442 | 1.168 | 1.090 | 1.247 | 1.062 |       |       |       |       |       |       |
| D |       |       |       |       |       |       |       |       |       |       | 0.951 |       |
| E |       |       |       |       |       |       |       |       |       |       |       |       |
| F |       |       |       |       |       |       |       |       |       |       |       |       |
| G | 0.065 | 0.066 | 0.062 | 0.072 | 0.060 | 0.070 | 0.056 | 0.233 | 0.207 | 0.213 | 0.063 | 0.053 |
| H | 0.044 | 0.045 | 0.048 | 0.046 | 0.047 | 0.044 | 0.052 | 0.050 | 0.112 | 0.060 | 0.050 | 0.048 |

Plattenbelegung

|   | 1            | 2            | 3            | 4            | 5            | 6            | 7            | 8            | 9            | 10           | 11           | 12           |
|---|--------------|--------------|--------------|--------------|--------------|--------------|--------------|--------------|--------------|--------------|--------------|--------------|
| A | T04SN1       | T04SN1       | T04SN2       | T04SN2       | T04SN3       | T04SN3       |              |              |              |              |              |              |
| B | T04SS11      | T04SS11      | T04SS12      | T04SS12      | T04SS13      | T04SS13      |              |              |              |              |              |              |
| C | T04SS21      | T04SS21      | T04SS22      | T04SS22      | T04SS23      | T04SS23      |              |              |              |              |              |              |
| D |              |              |              |              |              |              |              |              |              |              | T04SN4       | T04SN4       |
| E |              |              |              |              |              |              |              |              |              |              | T04SS14      | T04SS14      |
| F |              |              |              |              |              |              |              |              |              |              | T04SS24      | T04SS24      |
| G | Blank PEG    | Blank PEG    | Blank PEG    | Blank PEG    | Blank PEG    | Blank PEG    | Blank PEG    | Blank PEG    | Blank PEG    | Blank PEG    | Blank PEG    | Blank PEG    |
| H | Blank no PEG | Blank no PEG | Blank no PEG | Blank no PEG | Blank no PEG | Blank no PEG | Blank no PEG | Blank no PEG | Blank no PEG | Blank no PEG | Blank no PEG | Blank no PEG |

dil.4\*dil2,75=dil.11  
 dil4\*dil.8\*dil.2,75=dil.88 oder nur von urspruengl. Dil 4 auf dil 8 erhoeht??? dann dil 22

Comment:  
 Erste 4 Reihen immer Testmessung zur Evaluierung der benötigten Verdünnung. Wird nicht mit ausgewertet. Unverdünte Messungen außerhalb der Linearität werden ebenfalls nicht ausgewertet. Dil.Faktor unverdünnte samples=2,75 (100µl sample+100µlRM+75µl stop sol.) Verdünnung Dil.8 Dil8\*Dil2,75=Dil.22, Rot= 2\* verdünnt, Dil4 und Dil 8, also Dil 2,75\*Dil8\*Dil3=Dil66

Samples aufgeteilt in lin high und low;niedriger konzentrierte Samples bei lin low zu finden.

Date Operator Date Control

|              |    |     |       |        |              |         |      |         |
|--------------|----|-----|-------|--------|--------------|---------|------|---------|
| 0            | T0 | E01 | 0     | 0      | kleiner LLOQ | #VALUE! | 1    | #VALUE! |
| 0            | T0 | E02 | 0     | 0      | kleiner LLOQ | #VALUE! | 1    | #VALUE! |
| 0            | T0 | E03 | 0     | 0      | kleiner LLOQ | #VALUE! | 1    | #VALUE! |
| 0            | T0 | E04 | 0     | 0      | kleiner LLOQ | #VALUE! | 1    | #VALUE! |
| 0            | T0 | E05 | 0     | 0      | kleiner LLOQ | #VALUE! | 1    | #VALUE! |
| 0            | T0 | E06 | 0     | 0      | kleiner LLOQ | #VALUE! | 1    | #VALUE! |
| 0            | T0 | E07 | 0     | 0      | kleiner LLOQ | #VALUE! | 1    | #VALUE! |
| 0            | T0 | E08 | 0     | 0      | kleiner LLOQ | #VALUE! | 1    | #VALUE! |
| 0            | T0 | E09 | 0     | 0      | kleiner LLOQ | #VALUE! | 1    | #VALUE! |
| 0            | T0 | E10 | 0     | 0      | kleiner LLOQ | #VALUE! | 1    | #VALUE! |
| T04SS14      | T0 | E11 | 0     | 0      | kleiner LLOQ | #VALUE! | 1    | #VALUE! |
| T04SS14      | T0 | E12 | 0     | 0      | kleiner LLOQ | #VALUE! | 1    | #VALUE! |
| 0            | T0 | F01 | 0     | 0      | kleiner LLOQ | #VALUE! | 1    | #VALUE! |
| 0            | T0 | F02 | 0     | 0      | kleiner LLOQ | #VALUE! | 1    | #VALUE! |
| 0            | T0 | F03 | 0     | 0      | kleiner LLOQ | #VALUE! | 1    | #VALUE! |
| 0            | T0 | F04 | 0     | 0      | kleiner LLOQ | #VALUE! | 1    | #VALUE! |
| 0            | T0 | F05 | 0     | 0      | kleiner LLOQ | #VALUE! | 1    | #VALUE! |
| 0            | T0 | F06 | 0     | 0      | kleiner LLOQ | #VALUE! | 1    | #VALUE! |
| 0            | T0 | F07 | 0     | 0      | kleiner LLOQ | #VALUE! | 1    | #VALUE! |
| 0            | T0 | F08 | 0     | 0      | kleiner LLOQ | #VALUE! | 1    | #VALUE! |
| 0            | T0 | F09 | 0     | 0      | kleiner LLOQ | #VALUE! | 1    | #VALUE! |
| 0            | T0 | F10 | 0     | 0      | kleiner LLOQ | #VALUE! | 1    | #VALUE! |
| T04SS24      | T0 | F11 | 0.000 | -0.051 | kleiner LLOQ | #VALUE! | 11   | #VALUE! |
| T04SS24      | T0 | F12 | 0     | 0      | kleiner LLOQ | #VALUE! | 1    | #VALUE! |
| Blank PEG    | T0 | G01 | 0     | 0      | kleiner LLOQ | #VALUE! | 1    | #VALUE! |
| Blank PEG    | T0 | G02 | 0     | 0      | kleiner LLOQ | #VALUE! | 1    | #VALUE! |
| Blank PEG    | T0 | G03 | 0     | 0      | kleiner LLOQ | #VALUE! | 1    | #VALUE! |
| Blank PEG    | T0 | G04 | 0     | 0      | kleiner LLOQ | #VALUE! | 1    | #VALUE! |
| Blank PEG    | T0 | G05 | 0     | 0      | kleiner LLOQ | #VALUE! | 1    | #VALUE! |
| Blank PEG    | T0 | G06 | 0     | 0      | kleiner LLOQ | #VALUE! | 1    | #VALUE! |
| Blank PEG    | T0 | G07 | 0.056 | 0.005  | kleiner LLOQ | #VALUE! | 2.75 | #VALUE! |
| Blank PEG    | T0 | G08 | 0.233 | 0.182  | kleiner LLOQ | #VALUE! | 2.75 | #VALUE! |
| Blank PEG    | T0 | G09 | 0.207 | 0.156  | kleiner LLOQ | #VALUE! | 2.75 | #VALUE! |
| Blank PEG    | T0 | G10 | 0.213 | 0.162  | kleiner LLOQ | #VALUE! | 2.75 | #VALUE! |
| Blank PEG    | T0 | G11 | 0.063 | 0.012  | kleiner LLOQ | #VALUE! | 2.75 | #VALUE! |
| Blank PEG    | T0 | G12 | 0.053 | 0.002  | kleiner LLOQ | #VALUE! | 2.75 | #VALUE! |
| Blank no PEG | T0 | H01 | 0     | 0      | kleiner LLOQ | #VALUE! | 1    | #VALUE! |
| Blank no PEG | T0 | H02 | 0     | 0      | kleiner LLOQ | #VALUE! | 1    | #VALUE! |
| Blank no PEG | T0 | H03 | 0     | 0      | kleiner LLOQ | #VALUE! | 1    | #VALUE! |
| Blank no PEG | T0 | H04 | 0     | 0      | kleiner LLOQ | #VALUE! | 1    | #VALUE! |
| Blank no PEG | T0 | H05 | 0     | 0      | kleiner LLOQ | #VALUE! | 1    | #VALUE! |
| Blank no PEG | T0 | H06 | 0     | 0      | kleiner LLOQ | #VALUE! | 1    | #VALUE! |
| Blank no PEG | T0 | H07 | 0.052 | 0.001  | kleiner LLOQ | #VALUE! | 2.75 | #VALUE! |
| Blank no PEG | T0 | H08 | 0.050 | -0.001 | kleiner LLOQ | #VALUE! | 2.75 | #VALUE! |
| Blank no PEG | T0 | H09 | 0.112 | 0.061  | kleiner LLOQ | #VALUE! | 2.75 | #VALUE! |
| Blank no PEG | T0 | H10 | 0.060 | 0.009  | kleiner LLOQ | #VALUE! | 2.75 | #VALUE! |
| Blank no PEG | T0 | H11 | 0.050 | -0.001 | kleiner LLOQ | #VALUE! | 2.75 | #VALUE! |
| Blank no PEG | T0 | H12 | 0.048 | -0.003 | kleiner LLOQ | #VALUE! | 2.75 | #VALUE! |

|       |    |     |       |       |              |         |       |         |
|-------|----|-----|-------|-------|--------------|---------|-------|---------|
| 0     | T1 | A01 | 0     | 0     | kleiner LLOQ | #VALUE! | 1     | #VALUE! |
| 0     | T1 | A02 | 0     | 0     | kleiner LLOQ | #VALUE! | 1     | #VALUE! |
| 0     | T1 | A03 | 0     | 0     | kleiner LLOQ | #VALUE! | 1     | #VALUE! |
| 0     | T1 | A04 | 0     | 0     | kleiner LLOQ | #VALUE! | 1     | #VALUE! |
| 0     | T1 | A05 | 0     | 0     | kleiner LLOQ | #VALUE! | 1     | #VALUE! |
| 0     | T1 | A06 | 0     | 0     | kleiner LLOQ | #VALUE! | 1     | #VALUE! |
| 0     | T1 | A07 | 0     | 0     | kleiner LLOQ | #VALUE! | 1     | #VALUE! |
| 0     | T1 | A08 | 0     | 0     | kleiner LLOQ | #VALUE! | 1     | #VALUE! |
| 0     | T1 | A09 | 0     | 0     | kleiner LLOQ | #VALUE! | 1     | #VALUE! |
| 0     | T1 | A10 | 0     | 0     | kleiner LLOQ | #VALUE! | 1     | #VALUE! |
| 0     | T1 | A11 | 0     | 0     | kleiner LLOQ | #VALUE! | 1     | #VALUE! |
| 0     | T1 | A12 | 0     | 0     | kleiner LLOQ | #VALUE! | 1     | #VALUE! |
| 0     | T1 | B01 | 0     | 0     | kleiner LLOQ | #VALUE! | 1     | #VALUE! |
| 0     | T1 | B02 | 0     | 0     | kleiner LLOQ | #VALUE! | 1     | #VALUE! |
| 0     | T1 | B03 | 0     | 0     | kleiner LLOQ | #VALUE! | 1     | #VALUE! |
| 0     | T1 | B04 | 0     | 0     | kleiner LLOQ | #VALUE! | 1     | #VALUE! |
| 0     | T1 | B05 | 0     | 0     | kleiner LLOQ | #VALUE! | 1     | #VALUE! |
| 0     | T1 | B06 | 0     | 0     | kleiner LLOQ | #VALUE! | 1     | #VALUE! |
| 0     | T1 | B07 | 0     | 0     | kleiner LLOQ | #VALUE! | 1     | #VALUE! |
| 0     | T1 | B08 | 0     | 0     | kleiner LLOQ | #VALUE! | 1     | #VALUE! |
| 0     | T1 | B09 | 0     | 0     | kleiner LLOQ | #VALUE! | 1     | #VALUE! |
| 0     | T1 | B10 | 0     | 0     | kleiner LLOQ | #VALUE! | 1     | #VALUE! |
| 0     | T1 | B11 | 0     | 0     | kleiner LLOQ | #VALUE! | 1     | #VALUE! |
| 0     | T1 | B12 | 0     | 0     | kleiner LLOQ | #VALUE! | 1     | #VALUE! |
| 0     | T1 | C01 | 0     | 0     | kleiner LLOQ | #VALUE! | 1     | #VALUE! |
| 0     | T1 | C02 | 0     | 0     | kleiner LLOQ | #VALUE! | 1     | #VALUE! |
| 0     | T1 | C03 | 0     | 0     | kleiner LLOQ | #VALUE! | 1     | #VALUE! |
| 0     | T1 | C04 | 0     | 0     | kleiner LLOQ | #VALUE! | 1     | #VALUE! |
| 0     | T1 | C05 | 0     | 0     | kleiner LLOQ | #VALUE! | 1     | #VALUE! |
| 0     | T1 | C06 | 0     | 0     | kleiner LLOQ | #VALUE! | 1     | #VALUE! |
| 0     | T1 | C07 | 0     | 0     | kleiner LLOQ | #VALUE! | 1     | #VALUE! |
| 0     | T1 | C08 | 0     | 0     | kleiner LLOQ | #VALUE! | 1     | #VALUE! |
| 0     | T1 | C09 | 0     | 0     | kleiner LLOQ | #VALUE! | 1     | #VALUE! |
| 0     | T1 | C10 | 0     | 0     | kleiner LLOQ | #VALUE! | 1     | #VALUE! |
| 0     | T1 | C11 | 0     | 0     | kleiner LLOQ | #VALUE! | 1     | #VALUE! |
| 0     | T1 | C12 | 0     | 0     | kleiner LLOQ | #VALUE! | 1     | #VALUE! |
| 0     | T1 | D01 | 0     | 0     | kleiner LLOQ | #VALUE! | 1     | #VALUE! |
| 0     | T1 | D02 | 0     | 0     | kleiner LLOQ | #VALUE! | 1     | #VALUE! |
| 0     | T1 | D03 | 0     | 0     | kleiner LLOQ | #VALUE! | 1     | #VALUE! |
| 0     | T1 | D04 | 0     | 0     | kleiner LLOQ | #VALUE! | 1     | #VALUE! |
| 0     | T1 | D05 | 0     | 0     | kleiner LLOQ | #VALUE! | 1     | #VALUE! |
| 0     | T1 | D06 | 0     | 0     | kleiner LLOQ | #VALUE! | 1     | #VALUE! |
| T1SN2 | T1 | D07 | 1.016 | 0.965 | 0.965        | 0.048   | 24.75 | 1.196   |
| T1SN2 | T1 | D08 | 1.042 | 0.991 | 0.991        | 0.053   | 24.75 | 1.302   |
| 0     | T1 | D09 | 0     | 0     | kleiner LLOQ | #VALUE! | 1     | #VALUE! |
| 0     | T1 | D10 | 0     | 0     | kleiner LLOQ | #VALUE! | 1     | #VALUE! |
| 0     | T1 | D11 | 0     | 0     | kleiner LLOQ | #VALUE! | 1     | #VALUE! |
| 0     | T1 | D12 | 0     | 0     | kleiner LLOQ | #VALUE! | 1     | #VALUE! |

Plate: T1

|   |   |   |   |   |       |       |       |       |       |       |       |       |       |
|---|---|---|---|---|-------|-------|-------|-------|-------|-------|-------|-------|-------|
|   | 1 | 2 | 3 | 4 | 5     | 6     | 7     | 8     | 9     | 10    | 11    | 12    |       |
| A |   |   |   |   |       |       |       |       |       |       |       |       |       |
| B |   |   |   |   |       |       |       |       |       |       |       |       |       |
| C |   |   |   |   |       |       |       |       |       |       |       |       |       |
| D |   |   |   |   |       |       |       | 1.016 | 1.042 |       |       |       |       |
| E |   |   |   |   | 0.964 | 1.027 |       |       |       |       |       |       |       |
| F |   |   |   |   | 0.965 | 1.043 | 1.423 | 1.549 |       |       |       |       |       |
| G |   |   |   |   |       |       |       | 0.065 | 0.053 | 0.052 | 0.056 | 0.050 | 0.055 |
| H |   |   |   |   |       |       |       | 0.051 | 0.051 | 0.051 | 0.052 | 0.052 | 0.051 |

Plattenbelegung

|   |   |   |   |   |        |        |              |              |              |              |              |              |
|---|---|---|---|---|--------|--------|--------------|--------------|--------------|--------------|--------------|--------------|
|   | 1 | 2 | 3 | 4 | 5      | 6      | 7            | 8            | 9            | 10           | 11           | 12           |
| A |   |   |   |   |        |        |              |              |              |              |              |              |
| B |   |   |   |   |        |        |              |              |              |              |              |              |
| C |   |   |   |   |        |        |              |              |              |              |              |              |
| D |   |   |   |   |        |        |              |              |              |              |              |              |
| E |   |   |   |   | T1SS11 | T1SS11 | T1SN2        | T1SN2        |              |              |              |              |
| F |   |   |   |   | T1SS21 | T1SS21 | T1SS22       | T1SS22       |              |              |              |              |
| G |   |   |   |   |        |        | Blank PEG    | Blank PEG    | Blank PEG    | Blank PEG    | Blank PEG    | Blank PEG    |
| H |   |   |   |   |        |        | Blank no PEG | Blank no PEG | Blank no PEG | Blank no PEG | Blank no PEG | Blank no PEG |

dil. 5\*dil. 2,75=dil. 13,75  
dil. 9\*dil. 2,75=dil. 24,75  
dil. 9\*dil. 4\*dil. 2,75=dil. 99  
dil. 9\*dil. 9\*dil. 2,75=dil. 222,75

Comment:

Date Operator Date Control

|              |    |     |       |       |              |         |       |         |
|--------------|----|-----|-------|-------|--------------|---------|-------|---------|
| 0            | T1 | E01 | 0     | 0     | kleiner LLOQ | #VALUE! | 1     | #VALUE! |
| 0            | T1 | E02 | 0     | 0     | kleiner LLOQ | #VALUE! | 1     | #VALUE! |
| 0            | T1 | E03 | 0     | 0     | kleiner LLOQ | #VALUE! | 1     | #VALUE! |
| 0            | T1 | E04 | 0     | 0     | kleiner LLOQ | #VALUE! | 1     | #VALUE! |
| T1SS11       | T1 | E05 | 0.964 | 0.913 | 0.913        | 0.040   | 13.75 | 0.546   |
| T1SS11       | T1 | E06 | 1.027 | 0.976 | 0.976        | 0.050   | 13.75 | 0.688   |
| 0            | T1 | E07 | 0     | 0     | kleiner LLOQ | #VALUE! | 1     | #VALUE! |
| 0            | T1 | E08 | 0     | 0     | kleiner LLOQ | #VALUE! | 1     | #VALUE! |
| 0            | T1 | E09 | 0     | 0     | kleiner LLOQ | #VALUE! | 1     | #VALUE! |
| 0            | T1 | E10 | 0     | 0     | kleiner LLOQ | #VALUE! | 1     | #VALUE! |
| 0            | T1 | E11 | 0     | 0     | kleiner LLOQ | #VALUE! | 1     | #VALUE! |
| 0            | T1 | E12 | 0     | 0     | kleiner LLOQ | #VALUE! | 1     | #VALUE! |
| 0            | T1 | F01 | 0     | 0     | kleiner LLOQ | #VALUE! | 1     | #VALUE! |
| 0            | T1 | F02 | 0     | 0     | kleiner LLOQ | #VALUE! | 1     | #VALUE! |
| 0            | T1 | F03 | 0     | 0     | kleiner LLOQ | #VALUE! | 1     | #VALUE! |
| 0            | T1 | F04 | 0     | 0     | kleiner LLOQ | #VALUE! | 1     | #VALUE! |
| T1SS21       | T1 | F05 | 0.965 | 0.914 | 0.914        | 0.040   | 24.75 | 0.986   |
| T1SS21       | T1 | F06 | 1.043 | 0.992 | 0.992        | 0.053   | 24.75 | 1.306   |
| T1SS22       | T1 | F07 | 1.423 | 1.372 | 1.372        | 0.116   | 24.75 | 2.859   |
| T1SS22       | T1 | F08 | 1.549 | 1.498 | 1.498        | 0.136   | 24.75 | 3.375   |
| 0            | T1 | F09 | 0     | 0     | kleiner LLOQ | #VALUE! | 1     | #VALUE! |
| 0            | T1 | F10 | 0     | 0     | kleiner LLOQ | #VALUE! | 1     | #VALUE! |
| 0            | T1 | F11 | 0     | 0     | kleiner LLOQ | #VALUE! | 1     | #VALUE! |
| 0            | T1 | F12 | 0     | 0     | kleiner LLOQ | #VALUE! | 1     | #VALUE! |
| 0            | T1 | G01 | 0     | 0     | kleiner LLOQ | #VALUE! | 1     | #VALUE! |
| 0            | T1 | G02 | 0     | 0     | kleiner LLOQ | #VALUE! | 1     | #VALUE! |
| 0            | T1 | G03 | 0     | 0     | kleiner LLOQ | #VALUE! | 1     | #VALUE! |
| 0            | T1 | G04 | 0     | 0     | kleiner LLOQ | #VALUE! | 1     | #VALUE! |
| 0            | T1 | G05 | 0     | 0     | kleiner LLOQ | #VALUE! | 1     | #VALUE! |
| 0            | T1 | G06 | 0     | 0     | kleiner LLOQ | #VALUE! | 1     | #VALUE! |
| Blank PEG    | T1 | G07 | 0     | 0     | kleiner LLOQ | #VALUE! | 2.75  | #VALUE! |
| Blank PEG    | T1 | G08 | 0     | 0     | kleiner LLOQ | #VALUE! | 2.75  | #VALUE! |
| Blank PEG    | T1 | G09 | 0     | 0     | kleiner LLOQ | #VALUE! | 2.75  | #VALUE! |
| Blank PEG    | T1 | G10 | 0     | 0     | kleiner LLOQ | #VALUE! | 2.75  | #VALUE! |
| Blank PEG    | T1 | G11 | 0     | 0     | kleiner LLOQ | #VALUE! | 2.75  | #VALUE! |
| Blank PEG    | T1 | G12 | 0     | 0     | kleiner LLOQ | #VALUE! | 2.75  | #VALUE! |
| 0            | T1 | H01 | 0     | 0     | kleiner LLOQ | #VALUE! | 1     | #VALUE! |
| 0            | T1 | H02 | 0     | 0     | kleiner LLOQ | #VALUE! | 1     | #VALUE! |
| 0            | T1 | H03 | 0     | 0     | kleiner LLOQ | #VALUE! | 1     | #VALUE! |
| 0            | T1 | H04 | 0     | 0     | kleiner LLOQ | #VALUE! | 1     | #VALUE! |
| 0            | T1 | H05 | 0     | 0     | kleiner LLOQ | #VALUE! | 1     | #VALUE! |
| 0            | T1 | H06 | 0     | 0     | kleiner LLOQ | #VALUE! | 1     | #VALUE! |
| Blank no PEG | T1 | H07 | 0     | 0     | kleiner LLOQ | #VALUE! | 2.75  | #VALUE! |
| Blank no PEG | T1 | H08 | 0     | 0     | kleiner LLOQ | #VALUE! | 2.75  | #VALUE! |
| Blank no PEG | T1 | H09 | 0     | 0     | kleiner LLOQ | #VALUE! | 2.75  | #VALUE! |
| Blank no PEG | T1 | H10 | 0     | 0     | kleiner LLOQ | #VALUE! | 2.75  | #VALUE! |
| Blank no PEG | T1 | H11 | 0     | 0     | kleiner LLOQ | #VALUE! | 2.75  | #VALUE! |
| Blank no PEG | T1 | H12 | 0     | 0     | kleiner LLOQ | #VALUE! | 2.75  | #VALUE! |
| 0            | T2 | A01 | 0     | 0     | kleiner LLOQ | #VALUE! | 1     | #VALUE! |
| 0            | T2 | A02 | 0     | 0     | kleiner LLOQ | #VALUE! | 1     | #VALUE! |
| 0            | T2 | A03 | 0     | 0     | kleiner LLOQ | #VALUE! | 1     | #VALUE! |
| 0            | T2 | A04 | 0     | 0     | kleiner LLOQ | #VALUE! | 1     | #VALUE! |
| 0            | T2 | A05 | 0     | 0     | kleiner LLOQ | #VALUE! | 1     | #VALUE! |
| 0            | T2 | A06 | 0     | 0     | kleiner LLOQ | #VALUE! | 1     | #VALUE! |
| 0            | T2 | A07 | 0     | 0     | kleiner LLOQ | #VALUE! | 1     | #VALUE! |
| 0            | T2 | A08 | 0     | 0     | kleiner LLOQ | #VALUE! | 1     | #VALUE! |
| 0            | T2 | A09 | 0     | 0     | kleiner LLOQ | #VALUE! | 1     | #VALUE! |
| 0            | T2 | A10 | 0     | 0     | kleiner LLOQ | #VALUE! | 1     | #VALUE! |
| 0            | T2 | A11 | 0     | 0     | kleiner LLOQ | #VALUE! | 1     | #VALUE! |
| 0            | T2 | A12 | 0     | 0     | kleiner LLOQ | #VALUE! | 1     | #VALUE! |
| 0            | T2 | B01 | 0     | 0     | kleiner LLOQ | #VALUE! | 1     | #VALUE! |
| 0            | T2 | B02 | 0     | 0     | kleiner LLOQ | #VALUE! | 1     | #VALUE! |
| 0            | T2 | B03 | 0     | 0     | kleiner LLOQ | #VALUE! | 1     | #VALUE! |
| 0            | T2 | B04 | 0     | 0     | kleiner LLOQ | #VALUE! | 1     | #VALUE! |
| 0            | T2 | B05 | 0     | 0     | kleiner LLOQ | #VALUE! | 1     | #VALUE! |
| 0            | T2 | B06 | 0     | 0     | kleiner LLOQ | #VALUE! | 1     | #VALUE! |
| 0            | T2 | B07 | 0     | 0     | kleiner LLOQ | #VALUE! | 1     | #VALUE! |
| 0            | T2 | B08 | 0     | 0     | kleiner LLOQ | #VALUE! | 1     | #VALUE! |
| 0            | T2 | B09 | 0     | 0     | kleiner LLOQ | #VALUE! | 1     | #VALUE! |
| 0            | T2 | B10 | 0     | 0     | kleiner LLOQ | #VALUE! | 1     | #VALUE! |
| 0            | T2 | B11 | 0     | 0     | kleiner LLOQ | #VALUE! | 1     | #VALUE! |
| 0            | T2 | B12 | 0     | 0     | kleiner LLOQ | #VALUE! | 1     | #VALUE! |

Plate: T2

|   | 1 | 2 | 3 | 4 | 5     | 6     | 7     | 8     | 9     | 10    | 11    | 12    |
|---|---|---|---|---|-------|-------|-------|-------|-------|-------|-------|-------|
| A |   |   |   |   |       |       |       |       |       |       |       |       |
| B |   |   |   |   |       |       |       |       |       |       |       |       |
| C |   |   |   |   |       |       |       |       |       |       |       |       |
| D |   |   |   |   |       |       |       |       | 1.460 | 1.257 | 1.233 | 1.375 |
| E |   |   |   |   |       |       |       |       |       |       | 1.554 | 1.513 |
| F |   |   |   |   |       |       |       |       |       |       |       |       |
| G |   |   |   |   |       |       | 0.056 | 0.055 | 0.055 | 0.055 | 0.056 | 0.063 |
| H |   |   |   |   | 2.569 | 2.528 | 0.052 | 0.053 | 0.053 | 0.053 | 0.052 | 0.052 |

Plattenbelegung

|   | 1 | 2 | 3 | 4 | 5 | 6 | 7 | 8 | 9     | 10    | 11    | 12    |
|---|---|---|---|---|---|---|---|---|-------|-------|-------|-------|
| A |   |   |   |   |   |   |   |   |       |       |       |       |
| B |   |   |   |   |   |   |   |   |       |       |       |       |
| C |   |   |   |   |   |   |   |   |       |       |       |       |
| D |   |   |   |   |   |   |   |   | T2SN3 | T2SN3 | T2SN4 | T2SN4 |



|        |    |     |   |   |              |         |   |         |
|--------|----|-----|---|---|--------------|---------|---|---------|
| 0      | T3 | A01 | 0 | 0 | kleiner LLOQ | #VALUE! | 1 | #VALUE! |
| 0      | T3 | A02 | 0 | 0 | kleiner LLOQ | #VALUE! | 1 | #VALUE! |
| 0      | T3 | A03 | 0 | 0 | kleiner LLOQ | #VALUE! | 1 | #VALUE! |
| 0      | T3 | A04 | 0 | 0 | kleiner LLOQ | #VALUE! | 1 | #VALUE! |
| 0      | T3 | A05 | 0 | 0 | kleiner LLOQ | #VALUE! | 1 | #VALUE! |
| 0      | T3 | A06 | 0 | 0 | kleiner LLOQ | #VALUE! | 1 | #VALUE! |
| 0      | T3 | A07 | 0 | 0 | kleiner LLOQ | #VALUE! | 1 | #VALUE! |
| 0      | T3 | A08 | 0 | 0 | kleiner LLOQ | #VALUE! | 1 | #VALUE! |
| 0      | T3 | A09 | 0 | 0 | kleiner LLOQ | #VALUE! | 1 | #VALUE! |
| 0      | T3 | A10 | 0 | 0 | kleiner LLOQ | #VALUE! | 1 | #VALUE! |
| 0      | T3 | A11 | 0 | 0 | kleiner LLOQ | #VALUE! | 1 | #VALUE! |
| 0      | T3 | A12 | 0 | 0 | kleiner LLOQ | #VALUE! | 1 | #VALUE! |
| 0      | T3 | B01 | 0 | 0 | kleiner LLOQ | #VALUE! | 1 | #VALUE! |
| 0      | T3 | B02 | 0 | 0 | kleiner LLOQ | #VALUE! | 1 | #VALUE! |
| 0      | T3 | B03 | 0 | 0 | kleiner LLOQ | #VALUE! | 1 | #VALUE! |
| 0      | T3 | B04 | 0 | 0 | kleiner LLOQ | #VALUE! | 1 | #VALUE! |
| 0      | T3 | B05 | 0 | 0 | kleiner LLOQ | #VALUE! | 1 | #VALUE! |
| 0      | T3 | B06 | 0 | 0 | kleiner LLOQ | #VALUE! | 1 | #VALUE! |
| 0      | T3 | B07 | 0 | 0 | kleiner LLOQ | #VALUE! | 1 | #VALUE! |
| 0      | T3 | B08 | 0 | 0 | kleiner LLOQ | #VALUE! | 1 | #VALUE! |
| 0      | T3 | B09 | 0 | 0 | kleiner LLOQ | #VALUE! | 1 | #VALUE! |
| 0      | T3 | B10 | 0 | 0 | kleiner LLOQ | #VALUE! | 1 | #VALUE! |
| 0      | T3 | B11 | 0 | 0 | kleiner LLOQ | #VALUE! | 1 | #VALUE! |
| 0      | T3 | B12 | 0 | 0 | kleiner LLOQ | #VALUE! | 1 | #VALUE! |
| 0      | T3 | C01 | 0 | 0 | kleiner LLOQ | #VALUE! | 1 | #VALUE! |
| 0      | T3 | C02 | 0 | 0 | kleiner LLOQ | #VALUE! | 1 | #VALUE! |
| 0      | T3 | C03 | 0 | 0 | kleiner LLOQ | #VALUE! | 1 | #VALUE! |
| 0      | T3 | C04 | 0 | 0 | kleiner LLOQ | #VALUE! | 1 | #VALUE! |
| 0      | T3 | C05 | 0 | 0 | kleiner LLOQ | #VALUE! | 1 | #VALUE! |
| 0      | T3 | C06 | 0 | 0 | kleiner LLOQ | #VALUE! | 1 | #VALUE! |
| 0      | T3 | C07 | 0 | 0 | kleiner LLOQ | #VALUE! | 1 | #VALUE! |
| 0      | T3 | C08 | 0 | 0 | kleiner LLOQ | #VALUE! | 1 | #VALUE! |
| 0      | T3 | C09 | 0 | 0 | kleiner LLOQ | #VALUE! | 1 | #VALUE! |
| 0      | T3 | C10 | 0 | 0 | kleiner LLOQ | #VALUE! | 1 | #VALUE! |
| 0      | T3 | C11 | 0 | 0 | kleiner LLOQ | #VALUE! | 1 | #VALUE! |
| 0      | T3 | C12 | 0 | 0 | kleiner LLOQ | #VALUE! | 1 | #VALUE! |
| 0      | T3 | D01 | 0 | 0 | kleiner LLOQ | #VALUE! | 1 | #VALUE! |
| 0      | T3 | D02 | 0 | 0 | kleiner LLOQ | #VALUE! | 1 | #VALUE! |
| 0      | T3 | D03 | 0 | 0 | kleiner LLOQ | #VALUE! | 1 | #VALUE! |
| 0      | T3 | D04 | 0 | 0 | kleiner LLOQ | #VALUE! | 1 | #VALUE! |
| 0      | T3 | D05 | 0 | 0 | kleiner LLOQ | #VALUE! | 1 | #VALUE! |
| 0      | T3 | D06 | 0 | 0 | kleiner LLOQ | #VALUE! | 1 | #VALUE! |
| T3SN2  | T3 | D07 | 0 | 0 | kleiner LLOQ | #VALUE! | 1 | #VALUE! |
| T3SN2  | T3 | D08 | 0 | 0 | kleiner LLOQ | #VALUE! | 1 | #VALUE! |
| T3SN3  | T3 | D09 | 0 | 0 | kleiner LLOQ | #VALUE! | 1 | #VALUE! |
| T3SN3  | T3 | D10 | 0 | 0 | kleiner LLOQ | #VALUE! | 1 | #VALUE! |
| T3SN4  | T3 | D11 | 0 | 0 | kleiner LLOQ | #VALUE! | 1 | #VALUE! |
| T3SN4  | T3 | D12 | 0 | 0 | kleiner LLOQ | #VALUE! | 1 | #VALUE! |
| 0      | T3 | E01 | 0 | 0 | kleiner LLOQ | #VALUE! | 1 | #VALUE! |
| 0      | T3 | E02 | 0 | 0 | kleiner LLOQ | #VALUE! | 1 | #VALUE! |
| 0      | T3 | E03 | 0 | 0 | kleiner LLOQ | #VALUE! | 1 | #VALUE! |
| 0      | T3 | E04 | 0 | 0 | kleiner LLOQ | #VALUE! | 1 | #VALUE! |
| T3SS11 | T3 | E05 | 0 | 0 | kleiner LLOQ | #VALUE! | 1 | #VALUE! |
| T3SS11 | T3 | E06 | 0 | 0 | kleiner LLOQ | #VALUE! | 1 | #VALUE! |
| T3SS12 | T3 | E07 | 0 | 0 | kleiner LLOQ | #VALUE! | 1 | #VALUE! |
| T3SS12 | T3 | E08 | 0 | 0 | kleiner LLOQ | #VALUE! | 1 | #VALUE! |
| T3SS13 | T3 | E09 | 0 | 0 | kleiner LLOQ | #VALUE! | 1 | #VALUE! |

Plate: T3

|   | 1 | 2 | 3 | 4 | 5 | 6 | 7     | 8     | 9     | 10    | 11    | 12    |
|---|---|---|---|---|---|---|-------|-------|-------|-------|-------|-------|
| A |   |   |   |   |   |   |       |       |       |       |       |       |
| B |   |   |   |   |   |   |       |       |       |       |       |       |
| C |   |   |   |   |   |   |       |       |       |       |       |       |
| D |   |   |   |   |   |   |       |       |       |       |       |       |
| E |   |   |   |   |   |   |       |       |       |       |       |       |
| F |   |   |   |   |   |   |       |       |       |       |       |       |
| G |   |   |   |   |   |   | 0.052 | 0.048 | 1.557 | 1.542 | 0.945 | 1.229 |
| H |   |   |   |   |   |   | 0.051 | 0.060 | 0.059 | 0.054 | 0.055 | 0.055 |

Plattenbelegung

|   | 1 | 2 | 3 | 4 | 5      | 6      | 7            | 8            | 9            | 10           | 11           | 12           |
|---|---|---|---|---|--------|--------|--------------|--------------|--------------|--------------|--------------|--------------|
| A |   |   |   |   |        |        |              |              |              |              |              |              |
| B |   |   |   |   |        |        |              |              |              |              |              |              |
| C |   |   |   |   |        |        |              |              |              |              |              |              |
| D |   |   |   |   |        |        |              |              |              |              |              |              |
| E |   |   |   |   | T3SS11 | T3SS11 | T3SS12       | T3SS12       | T3SS13       | T3SS13       | T3SS14       | T3SS14       |
| F |   |   |   |   | T3SS21 | T3SS21 | T3SS22       | T3SS22       | T3SS23       | T3SS23       | T3SS24       | T3SS24       |
| G |   |   |   |   |        |        | Blank PEG    | Blank PEG    | Blank PEG    | Blank PEG    | Blank PEG    | Blank PEG    |
| H |   |   |   |   |        |        | Blank no PEG | Blank no PEG | Blank no PEG | Blank no PEG | Blank no PEG | Blank no PEG |

Comment:

Date      Operator      Date      Control



|              |    |     |       |       |              |         |      |         |
|--------------|----|-----|-------|-------|--------------|---------|------|---------|
| T3SS13       | T3 | E10 | 0     | 0     | kleiner LLOQ | #VALUE! | 1    | #VALUE! |
| T3SS14       | T3 | E11 | 0     | 0     | kleiner LLOQ | #VALUE! | 1    | #VALUE! |
| T3SS14       | T3 | E12 | 0     | 0     | kleiner LLOQ | #VALUE! | 1    | #VALUE! |
| 0            | T3 | F01 | 0     | 0     | kleiner LLOQ | #VALUE! | 1    | #VALUE! |
| 0            | T3 | F02 | 0     | 0     | kleiner LLOQ | #VALUE! | 1    | #VALUE! |
| 0            | T3 | F03 | 0     | 0     | kleiner LLOQ | #VALUE! | 1    | #VALUE! |
| 0            | T3 | F04 | 0     | 0     | kleiner LLOQ | #VALUE! | 1    | #VALUE! |
| T3SS21       | T3 | F05 | 0     | 0     | kleiner LLOQ | #VALUE! | 1    | #VALUE! |
| T3SS21       | T3 | F06 | 0     | 0     | kleiner LLOQ | #VALUE! | 1    | #VALUE! |
| T3SS22       | T3 | F07 | 0     | 0     | kleiner LLOQ | #VALUE! | 1    | #VALUE! |
| T3SS22       | T3 | F08 | 0     | 0     | kleiner LLOQ | #VALUE! | 1    | #VALUE! |
| T3SS23       | T3 | F09 | 1.557 | 1.506 | 1.506        | 0.138   | 2.75 | 0.378   |
| T3SS23       | T3 | F10 | 1.542 | 1.491 | 1.491        | 0.135   | 2.75 | 0.372   |
| T3SS24       | T3 | F11 | 0.945 | 0.894 | 0.894        | 0.037   | 2.75 | 0.100   |
| T3SS24       | T3 | F12 | 1.229 | 1.178 | 1.178        | 0.083   | 2.75 | 0.229   |
| 0            | T3 | G01 | 0     | 0     | kleiner LLOQ | #VALUE! | 1    | #VALUE! |
| 0            | T3 | G02 | 0     | 0     | kleiner LLOQ | #VALUE! | 1    | #VALUE! |
| 0            | T3 | G03 | 0     | 0     | kleiner LLOQ | #VALUE! | 1    | #VALUE! |
| 0            | T3 | G04 | 0     | 0     | kleiner LLOQ | #VALUE! | 1    | #VALUE! |
| 0            | T3 | G05 | 0     | 0     | kleiner LLOQ | #VALUE! | 1    | #VALUE! |
| 0            | T3 | G06 | 0     | 0     | kleiner LLOQ | #VALUE! | 1    | #VALUE! |
| Blank PEG    | T3 | G07 | 0     | 0     | kleiner LLOQ | #VALUE! | 2.75 | #VALUE! |
| Blank PEG    | T3 | G08 | 0     | 0     | kleiner LLOQ | #VALUE! | 2.75 | #VALUE! |
| Blank PEG    | T3 | G09 | 0     | 0     | kleiner LLOQ | #VALUE! | 2.75 | #VALUE! |
| Blank PEG    | T3 | G10 | 0     | 0     | kleiner LLOQ | #VALUE! | 2.75 | #VALUE! |
| Blank PEG    | T3 | G11 | 0     | 0     | kleiner LLOQ | #VALUE! | 2.75 | #VALUE! |
| Blank PEG    | T3 | G12 | 0     | 0     | kleiner LLOQ | #VALUE! | 2.75 | #VALUE! |
| 0            | T3 | H01 | 0     | 0     | kleiner LLOQ | #VALUE! | 1    | #VALUE! |
| 0            | T3 | H02 | 0     | 0     | kleiner LLOQ | #VALUE! | 1    | #VALUE! |
| 0            | T3 | H03 | 0     | 0     | kleiner LLOQ | #VALUE! | 1    | #VALUE! |
| 0            | T3 | H04 | 0     | 0     | kleiner LLOQ | #VALUE! | 1    | #VALUE! |
| 0            | T3 | H05 | 0     | 0     | kleiner LLOQ | #VALUE! | 1    | #VALUE! |
| 0            | T3 | H06 | 0     | 0     | kleiner LLOQ | #VALUE! | 1    | #VALUE! |
| Blank no PEG | T3 | H07 | 0     | 0     | kleiner LLOQ | #VALUE! | 2.75 | #VALUE! |
| Blank no PEG | T3 | H08 | 0     | 0     | kleiner LLOQ | #VALUE! | 2.75 | #VALUE! |
| Blank no PEG | T3 | H09 | 0     | 0     | kleiner LLOQ | #VALUE! | 2.75 | #VALUE! |
| Blank no PEG | T3 | H10 | 0     | 0     | kleiner LLOQ | #VALUE! | 2.75 | #VALUE! |
| Blank no PEG | T3 | H11 | 0     | 0     | kleiner LLOQ | #VALUE! | 2.75 | #VALUE! |
| Blank no PEG | T3 | H12 | 0     | 0     | kleiner LLOQ | #VALUE! | 2.75 | #VALUE! |

|       |       |       |       |       |       |       |       |       |       |       |       |
|-------|-------|-------|-------|-------|-------|-------|-------|-------|-------|-------|-------|
| 1.447 | 1.739 |       | 1.170 |       |       |       |       |       | 0.667 | 0.440 | 0.043 |
| 1.447 | 1.332 |       | 1.392 | 0.137 | 0.146 | 0.130 | 0.138 | 0.109 | 0.729 | 0.478 | 0.042 |
| 1.391 | 1.281 |       | 1.311 | 0.204 | 0.184 | 0.184 | 0.198 | 0.201 | 0.743 | 0.474 | 0.043 |
| 0.961 | 0.835 |       | 1.405 | 0.336 | 0.347 | 0.375 | 0.387 | 0.300 | 0.824 | 0.483 | 0.044 |
| 0.445 | 0.441 |       | 1.280 | 1.085 | 1.086 | 1.218 | 1.004 | 0.873 | 0.704 | 0.457 | 0.041 |
| 0.355 | 0.315 |       | 1.332 | 1.768 | 1.925 | 1.753 | 1.739 | 1.606 |       |       | 0.036 |
| 0.223 | 0.188 | 1.666 | 1.499 | 1.632 |       | 0.048 | 0.046 | 0.047 | 0.048 | 0.048 | 0.048 |
| 0.118 | 0.106 | 1.556 | 1.622 | 1.573 |       | 0.047 | 0.054 | 0.051 | 0.051 | 0.052 | 0.051 |

1

|       |       |       |       |       |       |       |       |       |       |       |       |
|-------|-------|-------|-------|-------|-------|-------|-------|-------|-------|-------|-------|
| 1.652 | 1.627 |       | 1.188 | 0.748 | 0.811 | 0.764 | 0.753 | 0.674 | 0.751 | 0.529 | 0.044 |
| 1.443 | 1.372 |       | 1.364 | 0.139 | 0.147 | 0.131 | 0.139 | 0.110 | 0.811 | 0.561 | 0.043 |
| 1.377 | 1.281 |       | 1.284 | 0.206 | 0.189 | 0.184 | 0.200 | 0.202 | 0.821 | 0.560 | 0.044 |
| 0.972 | 0.883 |       | 1.387 | 0.339 | 0.349 | 0.386 | 0.406 | 0.312 | 0.903 | 0.565 | 0.044 |
| 0.484 | 0.474 |       | 1.298 | 1.087 | 1.113 | 1.203 | 1.022 | 0.903 | 0.790 | 0.544 | 0.042 |
| 0.359 | 0.326 |       | 1.308 | 1.622 | 1.622 | 1.630 | 1.625 | 1.550 |       |       | 0.037 |
| 0.228 | 0.199 | 1.527 | 1.373 | 1.462 |       | 0.048 | 0.046 | 0.048 | 0.049 | 0.049 | 0.049 |
| 0.125 | 0.109 | 1.473 | 1.410 | 1.371 |       | 0.048 | 0.054 | 0.052 | 0.052 | 0.052 | 0.051 |

2

|       |       |       |       |       |       |       |       |       |       |       |       |
|-------|-------|-------|-------|-------|-------|-------|-------|-------|-------|-------|-------|
| 1.579 | 1.475 |       | 1.150 | 1.210 | 1.303 | 1.202 | 1.219 | 1.125 | 0.759 | 0.549 | 0.043 |
| 1.357 | 1.303 |       | 1.283 | 0.140 | 0.148 | 0.131 | 0.139 | 0.111 | 0.820 | 0.575 | 0.043 |
| 1.323 | 1.228 |       | 1.227 | 0.206 | 0.188 | 0.184 | 0.198 | 0.201 | 0.824 | 0.579 | 0.043 |
| 0.959 | 0.872 |       | 1.321 | 0.339 | 0.348 | 0.387 | 0.406 | 0.314 | 0.909 | 0.580 | 0.044 |
| 0.483 | 0.473 |       | 1.270 | 1.069 | 1.103 | 1.181 | 1.017 | 0.903 | 0.798 | 0.560 | 0.042 |
| 0.360 | 0.326 |       | 1.270 | 1.497 | 1.448 | 1.496 | 1.494 | 1.449 |       |       | 0.037 |
| 0.228 | 0.199 | 1.374 | 1.262 | 1.314 |       | 0.048 | 0.046 | 0.048 | 0.049 | 0.049 | 0.049 |
| 0.125 | 0.110 | 1.346 | 1.262 | 1.253 |       | 0.048 | 0.054 | 0.052 | 0.052 | 0.052 | 0.051 |

3

|       |       |  |  |       |       |       |       |       |       |       |       |
|-------|-------|--|--|-------|-------|-------|-------|-------|-------|-------|-------|
| 1.511 | 1.369 |  |  | 1.538 | 1.712 | 1.528 | 1.502 | 1.425 |       |       | 0.043 |
| 1.296 | 1.261 |  |  |       |       |       |       |       |       |       | 0.043 |
| 1.272 | 1.193 |  |  |       |       |       |       |       |       |       | 0.043 |
| 0.947 | 0.859 |  |  |       |       |       |       |       |       |       | 0.044 |
| 0.481 | 0.471 |  |  |       |       |       |       |       |       |       | 0.042 |
| 0.361 | 0.325 |  |  |       |       |       |       |       |       |       | 0.037 |
| 0.229 | 0.199 |  |  |       |       | 0.048 | 0.046 | 0.048 | 0.049 | 0.049 | 0.049 |
| 0.125 | 0.110 |  |  |       |       | 0.047 | 0.054 | 0.052 | 0.052 | 0.052 | 0.051 |

4

|       |       |       |       |       |       |       |       |       |       |       |       |
|-------|-------|-------|-------|-------|-------|-------|-------|-------|-------|-------|-------|
| 1.493 | 1.317 | 1.678 | 1.110 | 1.621 | 1.807 | 1.618 | 1.584 | 1.508 | 0.765 | 0.597 | 0.043 |
| 1.259 | 1.238 | 1.850 | 1.197 | 0.139 | 0.150 | 0.132 | 0.139 | 0.111 | 0.821 | 0.588 | 0.043 |
| 1.248 | 1.175 | 1.816 | 1.153 | 0.204 | 0.188 | 0.184 | 0.197 | 0.199 | 0.831 | 0.599 | 0.044 |
| 0.943 | 0.859 | 1.970 | 1.231 | 0.338 | 0.357 | 0.386 | 0.406 | 0.316 | 0.916 | 0.595 | 0.044 |
| 0.480 | 0.470 | 2.220 | 1.220 | 1.054 | 1.088 | 1.154 | 1.006 | 0.902 | 0.805 | 0.579 | 0.042 |
| 0.359 | 0.325 | 2.149 | 1.211 | 1.395 | 1.324 | 1.348 | 1.345 | 1.317 | 0.037 | 0.037 | 0.037 |
| 0.228 | 0.199 | 1.240 | 1.151 | 1.183 | 0.034 | 0.049 | 0.046 | 0.048 | 0.049 | 0.049 | 0.049 |
| 0.125 | 0.110 | 1.223 | 1.132 | 1.146 | 0.038 | 0.048 | 0.054 | 0.052 | 0.052 | 0.052 | 0.051 |

5

|       |       |  |       |       |       |       |       |       |       |       |       |
|-------|-------|--|-------|-------|-------|-------|-------|-------|-------|-------|-------|
| 1.434 | 1.258 |  | 1.090 | 1.648 | 1.876 | 1.649 | 1.627 | 1.535 |       |       |       |
| 1.217 | 1.201 |  | 1.149 |       |       |       |       |       |       |       |       |
| 1.205 | 1.143 |  | 1.109 |       |       |       |       |       |       |       |       |
| 0.935 | 0.845 |  | 1.182 |       |       |       |       |       |       |       |       |
| 0.477 | 0.469 |  | 1.181 |       |       |       |       |       |       |       |       |
| 0.360 | 0.323 |  | 1.167 |       |       |       |       |       |       |       |       |
| 0.229 | 0.200 |  |       |       |       | 0.049 | 0.047 | 0.048 | 0.049 | 0.049 | 0.049 |
| 0.125 | 0.110 |  |       |       |       | 0.048 | 0.054 | 0.052 | 0.052 | 0.052 | 0.051 |

6

|       |       |       |       |       |       |       |       |       |       |       |       |
|-------|-------|-------|-------|-------|-------|-------|-------|-------|-------|-------|-------|
| 1.013 | 0.810 |       | 0.668 | 0.808 | 0.940 | 0.720 | 0.798 | 0.687 | 0.904 | 0.845 | 0.043 |
| 0.709 | 0.827 |       | 0.703 | 0.142 | 0.156 | 0.136 | 0.137 | 0.116 | 0.990 | 0.846 | 0.042 |
| 0.682 | 0.692 |       | 0.680 | 0.197 | 0.188 | 0.190 | 0.191 | 0.184 | 1.023 | 0.861 | 0.043 |
| 0.507 | 0.519 |       | 0.740 | 0.316 | 0.264 | 0.364 | 0.377 | 0.312 | 1.111 | 0.870 | 0.043 |
| 0.394 | 0.406 |       | 0.682 | 0.580 | 0.561 | 0.600 | 0.529 | 0.563 | 0.962 | 0.834 | 0.042 |
| 0.333 | 0.322 |       | 0.661 | 0.995 | 0.930 | 0.848 | 0.832 | 0.797 | 0.037 | 0.037 | 0.037 |
| 0.229 | 0.201 | 0.843 | 0.679 | 0.732 |       | 0.048 | 0.046 | 0.047 |       |       | 0.047 |
| 0.124 | 0.111 | 0.773 | 0.682 | 0.701 |       | 0.047 | 0.053 | 0.051 | 0.051 | 0.052 | 0.051 |

7

Skin cultivation

|       |       |       |       |  |  |  |  |  |  |  |  |              |
|-------|-------|-------|-------|--|--|--|--|--|--|--|--|--------------|
| 1.459 | 1.152 | 1.423 | 0.357 |  |  |  |  |  |  |  |  | TO 1 hum sui |
|-------|-------|-------|-------|--|--|--|--|--|--|--|--|--------------|





|                    |              |                              |                            |                              |                              |
|--------------------|--------------|------------------------------|----------------------------|------------------------------|------------------------------|
| Project number     | F-120        | Apparatus                    | Wallac Victor              | Operator                     | IsBa                         |
| GLP Study (Number) | n.a.         | Protocol (instrument method) | LDH test 2016              | Date of preparation          | 19-04-18                     |
| hot substance      | isotope      | File name (results)          | IsBa_180419/20_LDH_full_v2 | Date of measurement          | 19-04-18                     |
|                    | name         | Kind of well plate           | 96 well                    | shaking time [min]           | 30                           |
| cold substance     | ACB-ID       | sample volume [µL]           | 100                        | stirring rate (Target) [rpm] | 150                          |
|                    | Batch number | Cocktail volume [µL]         | 175                        | Kind of measurement          | UV-vis                       |
|                    | name         | ACB-ID of cocktail           |                            | Wave length [nm]             | 450                          |
|                    | ACB-ID       | Matrix                       | DMEM (from powder)+PEG     | Remarks                      | Cocktail 100µl RM, 75µl STOP |
|                    | Batch number | Blank description            | DMEM/PEG, H2O              | Remarks                      | 7 standards split low/high   |
| n.a.               | n.a.         | Pipettes (No. / volume)      | 50-200µl                   | Remarks                      | KLP4 common for both         |
| n.a.               | n.a.         | Pipettes (No. / volume)      | n.a.                       | Remarks                      | n.a.                         |

Messdaten (diese Tabelle in Bericht übernehmen)

| Sample name * | concentration (theor.) * | measured data | measured data | mean measured | SD    | RSD   | Blank * | measured data after * Blank subtraction | concentration (calc.) * | Deviation * | Residuen |
|---------------|--------------------------|---------------|---------------|---------------|-------|-------|---------|-----------------------------------------|-------------------------|-------------|----------|
|               | [µg/mL]                  | [AU]          | [AU]          | [AU]          | [AU]  | [%]   | [AU]    |                                         | [µg/mL]                 | [%]         |          |
| KLP1          |                          |               |               |               |       |       | 0.047   |                                         |                         |             |          |
| KLP2          |                          |               |               |               |       |       | 0.054   |                                         |                         |             |          |
| KLP3          |                          |               |               |               |       |       | 0.051   |                                         |                         |             |          |
| KLP4          | 0.041                    | 0.959         | 0.972         | 0.883         | 0.938 | 0.04  | 4.19    | 0.051                                   | 0.887                   | 0.041       | -0.57    |
| KLP5          | 0.018                    | 0.483         | 0.484         | 0.474         | 0.480 | 0.00  | 0.98    | 0.052                                   | 0.429                   | 0.019       | 2.42     |
| KLP6          | 0.012                    | 0.360         | 0.359         | 0.326         | 0.348 | 0.02  | 4.54    | 0.051                                   | 0.297                   | 0.013       | 5.00     |
| KLP7          | 0.007                    | 0.228         | 0.228         | 0.199         | 0.218 | 0.014 | 6.35    |                                         | 0.168                   | 0.006       | -11.29   |
| KLP8          |                          |               |               |               |       |       |         |                                         |                         |             |          |

Statistical data

|                                              |                                          |                     |              |
|----------------------------------------------|------------------------------------------|---------------------|--------------|
| Geradensteigung                              | Slope                                    | m                   | 21.03        |
| Y-Achsenabschnitt                            | Y-Intercept                              | b                   | 0.03         |
| Standardabw. Geradensteigung                 | SD-Slope                                 | S <sub>m</sub>      | 0.648055501  |
| Standardabw. Achsenabschnittes               | SD-Y-Intercept                           | S <sub>b</sub>      | 0.015177452  |
| Anzahl Messpunkte                            | number of measuring points               | n                   | 4            |
| Quadratsumme                                 | sum of squares                           | Q <sub>xx</sub>     | 0.000664046  |
| Bereichsmittle                               |                                          |                     | 0.019557193  |
| Freiheitsgrade                               | degree of freedom                        | f                   | 2            |
| Student-t-Faktor für (P = 95 %; f = n-2)     | Student-t-factor for (P = 95 %; f = n-2) | t                   | 4.303        |
| Vertrauensbereich Steig. (95 %) Obergrenze   |                                          | m + VB <sub>m</sub> | 23.81763508  |
| Vertrauensbereich Steig. (95 %) Untergrenze  |                                          | m - VB <sub>m</sub> | 18.24046944  |
| Vertrauensbereich Achsenabschnitt (95 %) Og. |                                          | b + VB <sub>b</sub> | 0.099335829  |
| Vertrauensbereich Achsenabschnitt (95 %) Ug. |                                          | b - VB <sub>b</sub> | -0.031281327 |
| Korrelationskoeffizient                      | correlation coefficient                  | r                   | 0.9991       |
| Bestimmtheitsmaß                             | determination coefficient                | r <sup>2</sup>      | 0.9981       |
| Reststandardabweichung                       |                                          | S <sub>0</sub>      | 0.01669983   |
| Summe Restquadrate                           |                                          | sd                  | 0.657385838  |
| Verfahrensstandardabw.                       |                                          | S <sub>00</sub>     | 0.000794131  |
| Rel. Verfahrensstandardabw. %                |                                          | V <sub>00</sub>     | 4.060559029  |

Berichten

|                          |       |
|--------------------------|-------|
| mean Blank               | 0     |
| SD Blank                 | 0.00  |
| RSD Blank                | 3.79  |
| x <sup>2</sup> SD (LLOQ) | 0.01  |
| x <sup>2</sup> SD (LOD)  | 0.01  |
| LLOQ (AU)                | 0.061 |
| LOD (AU)                 | 0.067 |
| ULOQ                     | 0.887 |
| LLOQ (Lin)               | 0.168 |

Evaluation / Comment

LDH linearity valid with 7 standards, split in lin high and lin low, each with 4 standards and KLP4 common standard for both. R<sup>2</sup> 0,9981, deviations for both between -13.34% and +13.04%

Date Operator Date Operator Control

Figure 1 Linearity



Figure 2 Method validation Residuen Plot



Evaluation / Comment

lin passed

Date

Operator

Date

Control

| Sample name | Plate | Position | [AU]  | [AU]-Blank | Rating       | [µg/mL] | Dilution factor | [µg/mL] |
|-------------|-------|----------|-------|------------|--------------|---------|-----------------|---------|
| 0           | T4    | A01      | 0     | 0          | kleiner LLOQ | #VALUE! | 1               | #VALUE! |
| 0           | T4    | A02      | 0     | 0          | kleiner LLOQ | #VALUE! | 1               | #VALUE! |
| 0           | T4    | A03      | 0     | 0          | kleiner LLOQ | #VALUE! | 1               | #VALUE! |
| 0           | T4    | A04      | 0     | 0          | kleiner LLOQ | #VALUE! | 1               | #VALUE! |
| 0           | T4    | A05      | 0     | 0          | kleiner LLOQ | #VALUE! | 1               | #VALUE! |
| 0           | T4    | A06      | 0     | 0          | kleiner LLOQ | #VALUE! | 1               | #VALUE! |
| 0           | T4    | A07      | 0     | 0          | kleiner LLOQ | #VALUE! | 1               | #VALUE! |
| 0           | T4    | A08      | 0     | 0          | kleiner LLOQ | #VALUE! | 1               | #VALUE! |
| 0           | T4    | A09      | 0     | 0          | kleiner LLOQ | #VALUE! | 1               | #VALUE! |
| 0           | T4    | A10      | 0     | 0          | kleiner LLOQ | #VALUE! | 1               | #VALUE! |
| 0           | T4    | A11      | 0     | 0          | kleiner LLOQ | #VALUE! | 1               | #VALUE! |
| 0           | T4    | A12      | 0     | 0          | kleiner LLOQ | #VALUE! | 1               | #VALUE! |
| 0           | T4    | B01      | 0     | 0          | kleiner LLOQ | #VALUE! | 1               | #VALUE! |
| 0           | T4    | B02      | 0     | 0          | kleiner LLOQ | #VALUE! | 1               | #VALUE! |
| 0           | T4    | B03      | 0     | 0          | kleiner LLOQ | #VALUE! | 1               | #VALUE! |
| 0           | T4    | B04      | 0     | 0          | kleiner LLOQ | #VALUE! | 1               | #VALUE! |
| 0           | T4    | B05      | 0     | 0          | kleiner LLOQ | #VALUE! | 1               | #VALUE! |
| 0           | T4    | B06      | 0     | 0          | kleiner LLOQ | #VALUE! | 1               | #VALUE! |
| 0           | T4    | B07      | 0     | 0          | kleiner LLOQ | #VALUE! | 1               | #VALUE! |
| 0           | T4    | B08      | 0     | 0          | kleiner LLOQ | #VALUE! | 1               | #VALUE! |
| 0           | T4    | B09      | 0     | 0          | kleiner LLOQ | #VALUE! | 1               | #VALUE! |
| 0           | T4    | B10      | 0     | 0          | kleiner LLOQ | #VALUE! | 1               | #VALUE! |
| 0           | T4    | B11      | 0     | 0          | kleiner LLOQ | #VALUE! | 1               | #VALUE! |
| 0           | T4    | B12      | 0     | 0          | kleiner LLOQ | #VALUE! | 1               | #VALUE! |
| 0           | T4    | C01      | 0     | 0          | kleiner LLOQ | #VALUE! | 1               | #VALUE! |
| 0           | T4    | C02      | 0     | 0          | kleiner LLOQ | #VALUE! | 1               | #VALUE! |
| 0           | T4    | C03      | 0     | 0          | kleiner LLOQ | #VALUE! | 1               | #VALUE! |
| 0           | T4    | C04      | 0     | 0          | kleiner LLOQ | #VALUE! | 1               | #VALUE! |
| 0           | T4    | C05      | 0     | 0          | kleiner LLOQ | #VALUE! | 1               | #VALUE! |
| 0           | T4    | C06      | 0     | 0          | kleiner LLOQ | #VALUE! | 1               | #VALUE! |
| 0           | T4    | C07      | 0     | 0          | kleiner LLOQ | #VALUE! | 1               | #VALUE! |
| 0           | T4    | C08      | 0     | 0          | kleiner LLOQ | #VALUE! | 1               | #VALUE! |
| 0           | T4    | C09      | 0     | 0          | kleiner LLOQ | #VALUE! | 1               | #VALUE! |
| 0           | T4    | C10      | 0     | 0          | kleiner LLOQ | #VALUE! | 1               | #VALUE! |
| 0           | T4    | C11      | 0     | 0          | kleiner LLOQ | #VALUE! | 1               | #VALUE! |
| 0           | T4    | C12      | 0     | 0          | kleiner LLOQ | #VALUE! | 1               | #VALUE! |
| 0           | T4    | D01      | 0     | 0          | kleiner LLOQ | #VALUE! | 1               | #VALUE! |
| 0           | T4    | D02      | 0     | 0          | kleiner LLOQ | #VALUE! | 1               | #VALUE! |
| 0           | T4    | D03      | 0     | 0          | kleiner LLOQ | #VALUE! | 1               | #VALUE! |
| 0           | T4    | D04      | 0     | 0          | kleiner LLOQ | #VALUE! | 1               | #VALUE! |
| 0           | T4    | D05      | 0     | 0          | kleiner LLOQ | #VALUE! | 1               | #VALUE! |
| 0           | T4    | D06      | 0     | 0          | kleiner LLOQ | #VALUE! | 1               | #VALUE! |
| T4SN2       | T4    | D07      | 0.427 | 0.376      | 0.376        | 0.016   | 11              | 0.179   |
| T4SN2       | T4    | D08      | 0.827 | 0.776      | 0.776        | 0.035   | 11              | 0.388   |
| T4SN3       | T4    | D09      | 0     | 0          | kleiner LLOQ | #VALUE! | 1               | #VALUE! |
| T4SN3       | T4    | D10      | 0     | 0          | kleiner LLOQ | #VALUE! | 1               | #VALUE! |
| T4SN4       | T4    | D11      | 0.745 | 0.694      | 0.694        | 0.031   | 2.75            | 0.086   |
| T4SN4       | T4    | D12      | 0.741 | 0.690      | 0.690        | 0.031   | 2.75            | 0.086   |

Plate: T4

| Test | Test | Test | Test  | Test  | Test  | Test  | Test  | Test  | Test  | Test  | Test  | Test  |
|------|------|------|-------|-------|-------|-------|-------|-------|-------|-------|-------|-------|
| 1    | 2    | 3    | 4     | 5     | 6     | 7     | 8     | 9     | 10    | 11    | 12    |       |
| A    |      |      |       |       |       |       |       |       |       |       |       |       |
| B    |      |      |       |       |       |       |       |       |       |       |       |       |
| C    |      |      |       |       |       |       |       |       |       |       |       |       |
| D    |      |      |       |       |       |       |       |       |       |       |       |       |
| E    |      |      |       |       | 0.307 | 0.302 | 0.444 | 0.439 |       |       |       |       |
| F    |      |      |       |       | 0.286 | 0.293 | 0.642 | 0.631 | 0.377 | 0.392 | 0.431 | 0.437 |
| G    |      |      | 0.331 | 0.350 |       |       | 0.052 | 0.054 | 0.052 | 0.052 | 0.052 | 0.051 |
| H    |      |      |       |       |       |       | 0.050 | 0.050 | 0.053 | 0.050 | 0.051 | 0.050 |

| Plattenbelegung | 1 | 2 | 3     | 4     | 5      | 6      | 7         | 8         | 9         | 10        | 11        | 12        |
|-----------------|---|---|-------|-------|--------|--------|-----------|-----------|-----------|-----------|-----------|-----------|
| A               |   |   |       |       |        |        |           |           |           |           |           |           |
| B               |   |   |       |       |        |        |           |           |           |           |           |           |
| C               |   |   |       |       |        |        |           |           |           |           |           |           |
| D               |   |   |       |       |        |        |           |           |           |           |           |           |
| E               |   |   |       |       |        | T4SN2  | T4SN2     | T4SN3     | T4SN3     | T4SN4     | T4SN4     |           |
| F               |   |   |       |       | T4SS11 | T4SS11 | T4SS12    | T4SS12    | T4SS13    | T4SS13    | T4SS14    | T4SS14    |
| G               |   |   |       |       | T4SS21 | T4SS21 | T4SS22    | T4SS22    | T4SS23    | T4SS23    | T4SS24    | T4SS24    |
| H               |   |   | T4SN3 | T4SN3 |        |        | Blank PEG | Blank PEG | Blank PEG | Blank PEG | Blank PEG | Blank PEG |

Samples aufgeteilt in lin high und low.höher konzentrierte Samples bei lin high zu finden.

dil4\*dil2,75=dil11  
dil.9\*2,75=dil24,75

Comment:

Erste 4 Reihen immer Testmessung zur Evaluierung der benötigten Verdünnung. Wird nicht mit ausgewertet. Unverdünte Messungen außerhalb der Linearität werden ebenfalls nicht ausgewertet. Dil.Faktor unverdünte samples=2,75 (100µl sample+100µlRM+75µl stop sol.) Verdünnung (gelb) Dil.8 Dil.8 Dil.2,75=Dil.22

Date Operator

Date Control

|              |    |     |       |       |              |         |       |         |
|--------------|----|-----|-------|-------|--------------|---------|-------|---------|
| 0            | T4 | E01 | 0     | 0     | kleiner LLOQ | #VALUE! | 1     | #VALUE! |
| 0            | T4 | E02 | 0     | 0     | kleiner LLOQ | #VALUE! | 1     | #VALUE! |
| 0            | T4 | E03 | 0     | 0     | kleiner LLOQ | #VALUE! | 1     | #VALUE! |
| 0            | T4 | E04 | 0     | 0     | kleiner LLOQ | #VALUE! | 1     | #VALUE! |
| T4SS11       | T4 | E05 | 0.307 | 0.256 | 0.256        | 0.011   | 24.75 | 0.261   |
| T4SS11       | T4 | E06 | 0.302 | 0.251 | 0.251        | 0.010   | 24.75 | 0.256   |
| T4SS12       | T4 | E07 | 0.444 | 0.393 | 0.393        | 0.017   | 11    | 0.188   |
| T4SS12       | T4 | E08 | 0.439 | 0.388 | 0.388        | 0.017   | 11    | 0.185   |
| T4SS13       | T4 | E09 | 0.274 | 0.223 | 0.223        | 0.009   | 24.75 | 0.222   |
| T4SS13       | T4 | E10 | 0.233 | 0.182 | 0.182        | 0.007   | 24.75 | 0.174   |
| T4SS14       | T4 | E11 | 0     | 0     | kleiner LLOQ | #VALUE! | 1     | #VALUE! |
| T4SS14       | T4 | E12 | 0     | 0     | kleiner LLOQ | #VALUE! | 1     | #VALUE! |
| 0            | T4 | F01 | 0     | 0     | kleiner LLOQ | #VALUE! | 1     | #VALUE! |
| 0            | T4 | F02 | 0     | 0     | kleiner LLOQ | #VALUE! | 1     | #VALUE! |
| 0            | T4 | F03 | 0     | 0     | kleiner LLOQ | #VALUE! | 1     | #VALUE! |
| 0            | T4 | F04 | 0     | 0     | kleiner LLOQ | #VALUE! | 1     | #VALUE! |
| T4SS21       | T4 | F05 | 0.286 | 0.235 | 0.235        | 0.010   | 24.75 | 0.237   |
| T4SS21       | T4 | F06 | 0.293 | 0.242 | 0.242        | 0.010   | 24.75 | 0.245   |
| T4SS22       | T4 | F07 | 0.642 | 0.591 | 0.591        | 0.027   | 11    | 0.292   |
| T4SS22       | T4 | F08 | 0.631 | 0.580 | 0.580        | 0.026   | 11    | 0.286   |
| T4SS23       | T4 | F09 | 0.377 | 0.326 | 0.326        | 0.014   | 11    | 0.153   |
| T4SS23       | T4 | F10 | 0.392 | 0.341 | 0.341        | 0.015   | 11    | 0.160   |
| T4SS24       | T4 | F11 | 0.431 | 0.380 | 0.380        | 0.016   | 11    | 0.181   |
| T4SS24       | T4 | F12 | 0.437 | 0.386 | 0.386        | 0.017   | 11    | 0.184   |
| 0            | T4 | G01 | 0     | 0     | kleiner LLOQ | #VALUE! | 1     | #VALUE! |
| 0            | T4 | G02 | 0     | 0     | kleiner LLOQ | #VALUE! | 1     | #VALUE! |
| T4SN3        | T4 | G03 | 0.331 | 0.281 | 0.281        | 0.012   | 11    | 0.129   |
| T4SN3        | T4 | G04 | 0.350 | 0.299 | 0.299        | 0.013   | 11    | 0.139   |
| 0            | T4 | G05 | 0     | 0     | kleiner LLOQ | #VALUE! | 1     | #VALUE! |
| 0            | T4 | G06 | 0     | 0     | kleiner LLOQ | #VALUE! | 1     | #VALUE! |
| Blank PEG    | T4 | G07 | 0     | 0     | kleiner LLOQ | #VALUE! | 2.75  | #VALUE! |
| Blank PEG    | T4 | G08 | 0     | 0     | kleiner LLOQ | #VALUE! | 2.75  | #VALUE! |
| Blank PEG    | T4 | G09 | 0     | 0     | kleiner LLOQ | #VALUE! | 2.75  | #VALUE! |
| Blank PEG    | T4 | G10 | 0     | 0     | kleiner LLOQ | #VALUE! | 2.75  | #VALUE! |
| Blank PEG    | T4 | G11 | 0     | 0     | kleiner LLOQ | #VALUE! | 2.75  | #VALUE! |
| Blank PEG    | T4 | G12 | 0     | 0     | kleiner LLOQ | #VALUE! | 2.75  | #VALUE! |
| 0            | T4 | H01 | 0     | 0     | kleiner LLOQ | #VALUE! | 1     | #VALUE! |
| 0            | T4 | H02 | 0     | 0     | kleiner LLOQ | #VALUE! | 1     | #VALUE! |
| 0            | T4 | H03 | 0     | 0     | kleiner LLOQ | #VALUE! | 1     | #VALUE! |
| 0            | T4 | H04 | 0     | 0     | kleiner LLOQ | #VALUE! | 1     | #VALUE! |
| 0            | T4 | H05 | 0     | 0     | kleiner LLOQ | #VALUE! | 1     | #VALUE! |
| 0            | T4 | H06 | 0     | 0     | kleiner LLOQ | #VALUE! | 1     | #VALUE! |
| Blank no PEG | T4 | H07 | 0     | 0     | kleiner LLOQ | #VALUE! | 2.75  | #VALUE! |
| Blank no PEG | T4 | H08 | 0     | 0     | kleiner LLOQ | #VALUE! | 2.75  | #VALUE! |
| Blank no PEG | T4 | H09 | 0     | 0     | kleiner LLOQ | #VALUE! | 2.75  | #VALUE! |
| Blank no PEG | T4 | H10 | 0     | 0     | kleiner LLOQ | #VALUE! | 2.75  | #VALUE! |
| Blank no PEG | T4 | H11 | 0     | 0     | kleiner LLOQ | #VALUE! | 2.75  | #VALUE! |
| Blank no PEG | T4 | H12 | 0     | 0     | kleiner LLOQ | #VALUE! | 2.75  | #VALUE! |



|       |    |     |       |       |              |         |      |         |
|-------|----|-----|-------|-------|--------------|---------|------|---------|
| 0     | T5 | A01 | 0     | 0     | kleiner LLOQ | #VALUE! | 1    | #VALUE! |
| 0     | T5 | A02 | 0     | 0     | kleiner LLOQ | #VALUE! | 1    | #VALUE! |
| 0     | T5 | A03 | 0     | 0     | kleiner LLOQ | #VALUE! | 1    | #VALUE! |
| 0     | T5 | A04 | 0     | 0     | kleiner LLOQ | #VALUE! | 1    | #VALUE! |
| 0     | T5 | A05 | 0     | 0     | kleiner LLOQ | #VALUE! | 1    | #VALUE! |
| 0     | T5 | A06 | 0     | 0     | kleiner LLOQ | #VALUE! | 1    | #VALUE! |
| 0     | T5 | A07 | 0     | 0     | kleiner LLOQ | #VALUE! | 1    | #VALUE! |
| 0     | T5 | A08 | 0     | 0     | kleiner LLOQ | #VALUE! | 1    | #VALUE! |
| 0     | T5 | A09 | 0     | 0     | kleiner LLOQ | #VALUE! | 1    | #VALUE! |
| 0     | T5 | A10 | 0     | 0     | kleiner LLOQ | #VALUE! | 1    | #VALUE! |
| 0     | T5 | A11 | 0     | 0     | kleiner LLOQ | #VALUE! | 1    | #VALUE! |
| 0     | T5 | A12 | 0     | 0     | kleiner LLOQ | #VALUE! | 1    | #VALUE! |
| 0     | T5 | B01 | 0     | 0     | kleiner LLOQ | #VALUE! | 1    | #VALUE! |
| 0     | T5 | B02 | 0     | 0     | kleiner LLOQ | #VALUE! | 1    | #VALUE! |
| 0     | T5 | B03 | 0     | 0     | kleiner LLOQ | #VALUE! | 1    | #VALUE! |
| 0     | T5 | B04 | 0     | 0     | kleiner LLOQ | #VALUE! | 1    | #VALUE! |
| 0     | T5 | B05 | 0     | 0     | kleiner LLOQ | #VALUE! | 1    | #VALUE! |
| 0     | T5 | B06 | 0     | 0     | kleiner LLOQ | #VALUE! | 1    | #VALUE! |
| 0     | T5 | B07 | 0     | 0     | kleiner LLOQ | #VALUE! | 1    | #VALUE! |
| 0     | T5 | B08 | 0     | 0     | kleiner LLOQ | #VALUE! | 1    | #VALUE! |
| 0     | T5 | B09 | 0     | 0     | kleiner LLOQ | #VALUE! | 1    | #VALUE! |
| 0     | T5 | B10 | 0     | 0     | kleiner LLOQ | #VALUE! | 1    | #VALUE! |
| 0     | T5 | B11 | 0     | 0     | kleiner LLOQ | #VALUE! | 1    | #VALUE! |
| 0     | T5 | B12 | 0     | 0     | kleiner LLOQ | #VALUE! | 1    | #VALUE! |
| 0     | T5 | C01 | 0     | 0     | kleiner LLOQ | #VALUE! | 1    | #VALUE! |
| 0     | T5 | C02 | 0     | 0     | kleiner LLOQ | #VALUE! | 1    | #VALUE! |
| 0     | T5 | C03 | 0     | 0     | kleiner LLOQ | #VALUE! | 1    | #VALUE! |
| 0     | T5 | C04 | 0     | 0     | kleiner LLOQ | #VALUE! | 1    | #VALUE! |
| 0     | T5 | C05 | 0     | 0     | kleiner LLOQ | #VALUE! | 1    | #VALUE! |
| 0     | T5 | C06 | 0     | 0     | kleiner LLOQ | #VALUE! | 1    | #VALUE! |
| 0     | T5 | C07 | 0     | 0     | kleiner LLOQ | #VALUE! | 1    | #VALUE! |
| 0     | T5 | C08 | 0     | 0     | kleiner LLOQ | #VALUE! | 1    | #VALUE! |
| 0     | T5 | C09 | 0     | 0     | kleiner LLOQ | #VALUE! | 1    | #VALUE! |
| 0     | T5 | C10 | 0     | 0     | kleiner LLOQ | #VALUE! | 1    | #VALUE! |
| 0     | T5 | C11 | 0     | 0     | kleiner LLOQ | #VALUE! | 1    | #VALUE! |
| 0     | T5 | C12 | 0     | 0     | kleiner LLOQ | #VALUE! | 1    | #VALUE! |
| 0     | T5 | D01 | 0     | 0     | kleiner LLOQ | #VALUE! | 1    | #VALUE! |
| 0     | T5 | D02 | 0     | 0     | kleiner LLOQ | #VALUE! | 1    | #VALUE! |
| 0     | T5 | D03 | 0     | 0     | kleiner LLOQ | #VALUE! | 1    | #VALUE! |
| 0     | T5 | D04 | 0     | 0     | kleiner LLOQ | #VALUE! | 1    | #VALUE! |
| 0     | T5 | D05 | 0     | 0     | kleiner LLOQ | #VALUE! | 1    | #VALUE! |
| 0     | T5 | D06 | 0     | 0     | kleiner LLOQ | #VALUE! | 1    | #VALUE! |
| T5SN2 | T5 | D07 | 0.790 | 0.739 | 0.739        | 0.034   | 8.25 | 0.276   |
| T5SN2 | T5 | D08 | 0.621 | 0.570 | 0.570        | 0.025   | 8.25 | 0.210   |
| T5SN3 | T5 | D09 | 0     | 0     | kleiner LLOQ | #VALUE! | 1    | #VALUE! |
| T5SN3 | T5 | D10 | 0     | 0     | kleiner LLOQ | #VALUE! | 1    | #VALUE! |
| T5SN4 | T5 | D11 | 0     | 0.449 | 0.449        | 0.020   | 2.75 | 0.054   |
| T5SN4 | T5 | D12 | 1     | 0.466 | 0.466        | 0.021   | 2.75 | 0.056   |

Plate: T5

|   |   |   |   |   |       |       |       |       |       |       |       |       |
|---|---|---|---|---|-------|-------|-------|-------|-------|-------|-------|-------|
|   | 1 | 2 | 3 | 4 | 5     | 6     | 7     | 8     | 9     | 10    | 11    | 12    |
| A |   |   |   |   |       |       |       |       |       |       |       |       |
| B |   |   |   |   |       |       |       |       |       |       |       |       |
| C |   |   |   |   |       |       |       |       |       |       |       |       |
| D |   |   |   |   |       |       | 0.790 | 0.621 |       |       | 0.500 | 0.517 |
| E |   |   |   |   | 0.528 | 0.542 | 0.908 | 0.926 | 0.448 | 0.444 | 0.768 | 0.790 |
| F |   |   |   |   | 0.841 | 0.840 | 0.606 | 0.597 | 0.712 | 0.741 | 0.916 | 0.915 |
| G |   |   |   |   |       |       | 0.053 | 0.053 | 0.054 | 0.053 | 0.053 | 0.052 |
| H |   |   |   |   |       |       | 0.101 | 0.056 | 0.052 | 0.050 | 0.054 | 0.053 |

Plattenbelegung

|   |   |   |   |   |        |        |              |              |              |              |              |              |
|---|---|---|---|---|--------|--------|--------------|--------------|--------------|--------------|--------------|--------------|
|   | 1 | 2 | 3 | 4 | 5      | 6      | 7            | 8            | 9            | 10           | 11           | 12           |
| A |   |   |   |   |        |        |              |              |              |              |              |              |
| B |   |   |   |   |        |        |              |              |              |              |              |              |
| C |   |   |   |   |        |        |              |              |              |              |              |              |
| D |   |   |   |   |        | T5SN2  | T5SN2        | T5SN3        | T5SN3        | T5SN4        | T5SN4        |              |
| E |   |   |   |   | T5SS11 | T5SS11 | T5SS12       | T5SS12       | T5SS13       | T5SS13       | T5SS14       | T5SS14       |
| F |   |   |   |   | T5SS21 | T5SS21 | T5SS22       | T5SS22       | T5SS23       | T5SS23       | T5SS24       | T5SS24       |
| G |   |   |   |   |        |        | Blank PEG    | Blank PEG    | Blank PEG    | Blank PEG    | Blank PEG    | Blank PEG    |
| H |   |   |   |   |        |        | Blank no PEG | Blank no PEG | Blank no PEG | Blank no PEG | Blank no PEG | Blank no PEG |

diI3\*diI2,75=diI8,25

Comment:

Date Operator

Date Control

|              |    |     |       |       |              |         |      |         |
|--------------|----|-----|-------|-------|--------------|---------|------|---------|
| 0            | T5 | E01 | 0     | 0     | kleiner LLOQ | #VALUE! | 1    | #VALUE! |
| 0            | T5 | E02 | 0     | 0     | kleiner LLOQ | #VALUE! | 1    | #VALUE! |
| 0            | T5 | E03 | 0     | 0     | kleiner LLOQ | #VALUE! | 1    | #VALUE! |
| 0            | T5 | E04 | 0     | 0     | kleiner LLOQ | #VALUE! | 1    | #VALUE! |
| T5SS11       | T5 | E05 | 0.528 | 0.477 | 0.477        | 0.021   | 2.75 | 0.058   |
| T5SS11       | T5 | E06 | 0.542 | 0.491 | 0.491        | 0.022   | 2.75 | 0.060   |
| T5SS12       | T5 | E07 | 0.908 | 0.857 | 0.857        | 0.039   | 2.75 | 0.108   |
| T5SS12       | T5 | E08 | 0.928 | 0.875 | 0.875        | 0.040   | 2.75 | 0.110   |
| T5SS13       | T5 | E09 | 0.448 | 0.397 | 0.397        | 0.017   | 2.75 | 0.048   |
| T5SS13       | T5 | E10 | 0.444 | 0.393 | 0.393        | 0.017   | 2.75 | 0.047   |
| T5SS14       | T5 | E11 | 0.768 | 0.717 | 0.717        | 0.032   | 2.75 | 0.089   |
| T5SS14       | T5 | E12 | 0.780 | 0.729 | 0.729        | 0.033   | 2.75 | 0.091   |
| 0            | T5 | F01 | 0     | 0     | kleiner LLOQ | #VALUE! | 1    | #VALUE! |
| 0            | T5 | F02 | 0     | 0     | kleiner LLOQ | #VALUE! | 1    | #VALUE! |
| 0            | T5 | F03 | 0     | 0     | kleiner LLOQ | #VALUE! | 1    | #VALUE! |
| 0            | T5 | F04 | 0     | 0     | kleiner LLOQ | #VALUE! | 1    | #VALUE! |
| T5SS21       | T5 | F05 | 0.841 | 0.790 | 0.790        | 0.036   | 2.75 | 0.099   |
| T5SS21       | T5 | F06 | 0.840 | 0.789 | 0.789        | 0.036   | 2.75 | 0.099   |
| T5SS22       | T5 | F07 | 0.606 | 0.555 | 0.555        | 0.025   | 2.75 | 0.068   |
| T5SS22       | T5 | F08 | 0.597 | 0.546 | 0.546        | 0.024   | 2.75 | 0.067   |
| T5SS23       | T5 | F09 | 0.712 | 0.661 | 0.661        | 0.030   | 2.75 | 0.082   |
| T5SS23       | T5 | F10 | 0.741 | 0.690 | 0.690        | 0.031   | 2.75 | 0.086   |
| T5SS24       | T5 | F11 | 0.916 | 0.865 | 0.865        | 0.040   | 2.75 | 0.109   |
| T5SS24       | T5 | F12 | 0.915 | 0.864 | 0.864        | 0.039   | 2.75 | 0.109   |
| 0            | T5 | G01 | 0     | 0     | kleiner LLOQ | #VALUE! | 1    | #VALUE! |
| 0            | T5 | G02 | 0     | 0     | kleiner LLOQ | #VALUE! | 1    | #VALUE! |
| 0            | T5 | G03 | 0     | 0     | kleiner LLOQ | #VALUE! | 1    | #VALUE! |
| 0            | T5 | G04 | 0     | 0     | kleiner LLOQ | #VALUE! | 1    | #VALUE! |
| 0            | T5 | G05 | 0     | 0     | kleiner LLOQ | #VALUE! | 1    | #VALUE! |
| 0            | T5 | G06 | 0     | 0     | kleiner LLOQ | #VALUE! | 1    | #VALUE! |
| Blank PEG    | T5 | G07 | 0     | 0     | kleiner LLOQ | #VALUE! | 2.75 | #VALUE! |
| Blank PEG    | T5 | G08 | 0     | 0     | kleiner LLOQ | #VALUE! | 2.75 | #VALUE! |
| Blank PEG    | T5 | G09 | 0     | 0     | kleiner LLOQ | #VALUE! | 2.75 | #VALUE! |
| Blank PEG    | T5 | G10 | 0     | 0     | kleiner LLOQ | #VALUE! | 2.75 | #VALUE! |
| Blank PEG    | T5 | G11 | 0     | 0     | kleiner LLOQ | #VALUE! | 2.75 | #VALUE! |
| Blank PEG    | T5 | G12 | 0     | 0     | kleiner LLOQ | #VALUE! | 2.75 | #VALUE! |
| 0            | T5 | H01 | 0     | 0     | kleiner LLOQ | #VALUE! | 1    | #VALUE! |
| 0            | T5 | H02 | 0     | 0     | kleiner LLOQ | #VALUE! | 1    | #VALUE! |
| 0            | T5 | H03 | 0     | 0     | kleiner LLOQ | #VALUE! | 1    | #VALUE! |
| 0            | T5 | H04 | 0     | 0     | kleiner LLOQ | #VALUE! | 1    | #VALUE! |
| 0            | T5 | H05 | 0     | 0     | kleiner LLOQ | #VALUE! | 1    | #VALUE! |
| 0            | T5 | H06 | 0     | 0     | kleiner LLOQ | #VALUE! | 1    | #VALUE! |
| Blank no PEG | T5 | H07 | 0     | 0     | kleiner LLOQ | #VALUE! | 2.75 | #VALUE! |
| Blank no PEG | T5 | H08 | 0     | 0     | kleiner LLOQ | #VALUE! | 2.75 | #VALUE! |
| Blank no PEG | T5 | H09 | 0     | 0     | kleiner LLOQ | #VALUE! | 2.75 | #VALUE! |
| Blank no PEG | T5 | H10 | 0     | 0     | kleiner LLOQ | #VALUE! | 2.75 | #VALUE! |
| Blank no PEG | T5 | H11 | 0     | 0     | kleiner LLOQ | #VALUE! | 2.75 | #VALUE! |
| Blank no PEG | T5 | H12 | 0     | 0     | kleiner LLOQ | #VALUE! | 2.75 | #VALUE! |
| 0            | T6 | A01 | 0     | 0     | kleiner LLOQ | #VALUE! | 1    | #VALUE! |
| 0            | T6 | A02 | 0     | 0     | kleiner LLOQ | #VALUE! | 1    | #VALUE! |
| 0            | T6 | A03 | 0     | 0     | kleiner LLOQ | #VALUE! | 1    | #VALUE! |
| 0            | T6 | A04 | 0     | 0     | kleiner LLOQ | #VALUE! | 1    | #VALUE! |
| 0            | T6 | A05 | 0     | 0     | kleiner LLOQ | #VALUE! | 1    | #VALUE! |
| 0            | T6 | A06 | 0     | 0     | kleiner LLOQ | #VALUE! | 1    | #VALUE! |
| 0            | T6 | A07 | 0     | 0     | kleiner LLOQ | #VALUE! | 1    | #VALUE! |
| 0            | T6 | A08 | 0     | 0     | kleiner LLOQ | #VALUE! | 1    | #VALUE! |
| 0            | T6 | A09 | 0     | 0     | kleiner LLOQ | #VALUE! | 1    | #VALUE! |
| 0            | T6 | A10 | 0     | 0     | kleiner LLOQ | #VALUE! | 1    | #VALUE! |
| 0            | T6 | A11 | 0     | 0     | kleiner LLOQ | #VALUE! | 1    | #VALUE! |
| 0            | T6 | A12 | 0     | 0     | kleiner LLOQ | #VALUE! | 1    | #VALUE! |
| 0            | T6 | B01 | 0     | 0     | kleiner LLOQ | #VALUE! | 1    | #VALUE! |
| 0            | T6 | B02 | 0     | 0     | kleiner LLOQ | #VALUE! | 1    | #VALUE! |
| 0            | T6 | B03 | 0     | 0     | kleiner LLOQ | #VALUE! | 1    | #VALUE! |
| 0            | T6 | B04 | 0     | 0     | kleiner LLOQ | #VALUE! | 1    | #VALUE! |
| 0            | T6 | B05 | 0     | 0     | kleiner LLOQ | #VALUE! | 1    | #VALUE! |
| 0            | T6 | B06 | 0     | 0     | kleiner LLOQ | #VALUE! | 1    | #VALUE! |
| 0            | T6 | B07 | 0     | 0     | kleiner LLOQ | #VALUE! | 1    | #VALUE! |
| 0            | T6 | B08 | 0     | 0     | kleiner LLOQ | #VALUE! | 1    | #VALUE! |
| 0            | T6 | B09 | 0     | 0     | kleiner LLOQ | #VALUE! | 1    | #VALUE! |
| 0            | T6 | B10 | 0     | 0     | kleiner LLOQ | #VALUE! | 1    | #VALUE! |
| 0            | T6 | B11 | 0     | 0     | kleiner LLOQ | #VALUE! | 1    | #VALUE! |
| 0            | T6 | B12 | 0     | 0     | kleiner LLOQ | #VALUE! | 1    | #VALUE! |
| 0            | T6 | C01 | 0     | 0     | kleiner LLOQ | #VALUE! | 1    | #VALUE! |

Plate: T6

|   | 1 | 2 | 3 | 4 | 5     | 6     | 7     | 8     | 9     | 10    | 11    | 12    |
|---|---|---|---|---|-------|-------|-------|-------|-------|-------|-------|-------|
| A |   |   |   |   |       |       |       |       |       |       |       |       |
| B |   |   |   |   |       |       |       |       |       |       |       |       |
| C |   |   |   |   |       |       |       |       |       |       |       |       |
| D |   |   |   |   |       |       |       |       | 0.607 | 0.625 | 0.409 | 0.413 |
| E |   |   |   |   | 0.341 | 0.356 | 0.341 | 0.349 | 0.231 | 0.239 | 0.257 | 0.254 |
| F |   |   |   |   | 0.251 | 0.260 | 0.283 | 0.286 | 0.421 | 0.436 | 0.559 | 0.563 |
| G |   |   |   |   |       |       | 0.051 | 0.050 | 0.050 | 0.052 | 0.051 | 0.051 |
| H |   |   |   |   |       |       | 0.050 | 0.050 | 0.050 | 0.050 | 0.049 | 0.049 |

Plattenbelegung

|   | 1 | 2 | 3 | 4 | 5      | 6      | 7      | 8      | 9      | 10     | 11     | 12     |
|---|---|---|---|---|--------|--------|--------|--------|--------|--------|--------|--------|
| A |   |   |   |   |        |        |        |        |        |        |        |        |
| B |   |   |   |   |        |        |        |        |        |        |        |        |
| C |   |   |   |   |        |        |        |        |        |        |        |        |
| D |   |   |   |   | T6SN1  | T6SN1  | T6SN2  | T6SN2  | T6SN3  | T6SN3  | T6SN4  | T6SN4  |
| E |   |   |   |   | T6SS11 | T6SS11 | T6SS12 | T6SS12 | T6SS13 | T6SS13 | T6SS14 | T6SS14 |



|           |    |     |       |       |              |         |      |         |
|-----------|----|-----|-------|-------|--------------|---------|------|---------|
| 0         | T7 | A06 | 0     | 0     | kleiner LLOQ | #VALUE! | 1    | #VALUE! |
| 0         | T7 | A07 | 0     | 0     | kleiner LLOQ | #VALUE! | 1    | #VALUE! |
| 0         | T7 | A08 | 0     | 0     | kleiner LLOQ | #VALUE! | 1    | #VALUE! |
| 0         | T7 | A09 | 0     | 0     | kleiner LLOQ | #VALUE! | 1    | #VALUE! |
| 0         | T7 | A10 | 0     | 0     | kleiner LLOQ | #VALUE! | 1    | #VALUE! |
| 0         | T7 | A11 | 0     | 0     | kleiner LLOQ | #VALUE! | 1    | #VALUE! |
| 0         | T7 | A12 | 0     | 0     | kleiner LLOQ | #VALUE! | 1    | #VALUE! |
| 0         | T7 | B01 | 0     | 0     | kleiner LLOQ | #VALUE! | 1    | #VALUE! |
| 0         | T7 | B02 | 0     | 0     | kleiner LLOQ | #VALUE! | 1    | #VALUE! |
| 0         | T7 | B03 | 0     | 0     | kleiner LLOQ | #VALUE! | 1    | #VALUE! |
| 0         | T7 | B04 | 0     | 0     | kleiner LLOQ | #VALUE! | 1    | #VALUE! |
| 0         | T7 | B05 | 0     | 0     | kleiner LLOQ | #VALUE! | 1    | #VALUE! |
| 0         | T7 | B06 | 0     | 0     | kleiner LLOQ | #VALUE! | 1    | #VALUE! |
| 0         | T7 | B07 | 0     | 0     | kleiner LLOQ | #VALUE! | 1    | #VALUE! |
| 0         | T7 | B08 | 0     | 0     | kleiner LLOQ | #VALUE! | 1    | #VALUE! |
| 0         | T7 | B09 | 0     | 0     | kleiner LLOQ | #VALUE! | 1    | #VALUE! |
| 0         | T7 | B10 | 0     | 0     | kleiner LLOQ | #VALUE! | 1    | #VALUE! |
| 0         | T7 | B11 | 0     | 0     | kleiner LLOQ | #VALUE! | 1    | #VALUE! |
| 0         | T7 | B12 | 0     | 0     | kleiner LLOQ | #VALUE! | 1    | #VALUE! |
| 0         | T7 | C01 | 0     | 0     | kleiner LLOQ | #VALUE! | 1    | #VALUE! |
| 0         | T7 | C02 | 0     | 0     | kleiner LLOQ | #VALUE! | 1    | #VALUE! |
| 0         | T7 | C03 | 0     | 0     | kleiner LLOQ | #VALUE! | 1    | #VALUE! |
| 0         | T7 | C04 | 0     | 0     | kleiner LLOQ | #VALUE! | 1    | #VALUE! |
| 0         | T7 | C05 | 0     | 0     | kleiner LLOQ | #VALUE! | 1    | #VALUE! |
| 0         | T7 | C06 | 0     | 0     | kleiner LLOQ | #VALUE! | 1    | #VALUE! |
| 0         | T7 | C07 | 0     | 0     | kleiner LLOQ | #VALUE! | 1    | #VALUE! |
| 0         | T7 | C08 | 0     | 0     | kleiner LLOQ | #VALUE! | 1    | #VALUE! |
| 0         | T7 | C09 | 0     | 0     | kleiner LLOQ | #VALUE! | 1    | #VALUE! |
| 0         | T7 | C10 | 0     | 0     | kleiner LLOQ | #VALUE! | 1    | #VALUE! |
| 0         | T7 | C11 | 0     | 0     | kleiner LLOQ | #VALUE! | 1    | #VALUE! |
| 0         | T7 | C12 | 0     | 0     | kleiner LLOQ | #VALUE! | 1    | #VALUE! |
| 0         | T7 | D01 | 0     | 0     | kleiner LLOQ | #VALUE! | 1    | #VALUE! |
| 0         | T7 | D02 | 0     | 0     | kleiner LLOQ | #VALUE! | 1    | #VALUE! |
| 0         | T7 | D03 | 0     | 0     | kleiner LLOQ | #VALUE! | 1    | #VALUE! |
| 0         | T7 | D04 | 0     | 0     | kleiner LLOQ | #VALUE! | 1    | #VALUE! |
| 0         | T7 | D05 | 0     | 0     | kleiner LLOQ | #VALUE! | 1    | #VALUE! |
| 0         | T7 | D06 | 0     | 0     | kleiner LLOQ | #VALUE! | 1    | #VALUE! |
| T7SN2     | T7 | D07 | 0.494 | 0.443 | 0.443        | 0.019   | 2.75 | 0.054   |
| T7SN2     | T7 | D08 | 0.470 | 0.419 | 0.419        | 0.018   | 2.75 | 0.050   |
| T7SN3     | T7 | D09 | 0.771 | 0.720 | 0.720        | 0.033   | 2.75 | 0.090   |
| T7SN3     | T7 | D10 | 0.761 | 0.710 | 0.710        | 0.032   | 2.75 | 0.088   |
| T7SN4     | T7 | D11 | 0.487 | 0.436 | 0.436        | 0.019   | 2.75 | 0.053   |
| T7SN4     | T7 | D12 | 0.504 | 0.453 | 0.453        | 0.020   | 2.75 | 0.055   |
| 0         | T7 | E01 | 0     | 0     | kleiner LLOQ | #VALUE! | 1    | #VALUE! |
| 0         | T7 | E02 | 0     | 0     | kleiner LLOQ | #VALUE! | 1    | #VALUE! |
| 0         | T7 | E03 | 0     | 0     | kleiner LLOQ | #VALUE! | 1    | #VALUE! |
| 0         | T7 | E04 | 0     | 0     | kleiner LLOQ | #VALUE! | 1    | #VALUE! |
| T7SS11    | T7 | E05 | 0.355 | 0.304 | 0.304        | 0.013   | 2.75 | 0.035   |
| T7SS11    | T7 | E06 | 0.359 | 0.308 | 0.308        | 0.013   | 2.75 | 0.036   |
| T7SS12    | T7 | E07 | 0.315 | 0.264 | 0.264        | 0.011   | 2.75 | 0.030   |
| T7SS12    | T7 | E08 | 0.311 | 0.260 | 0.260        | 0.011   | 2.75 | 0.030   |
| T7SS13    | T7 | E09 | 0.190 | 0.139 | kleiner LLOQ | #VALUE! | 2.75 | #VALUE! |
| T7SS13    | T7 | E10 | 0.179 | 0.128 | kleiner LLOQ | #VALUE! | 2.75 | #VALUE! |
| T7SS14    | T7 | E11 | 0.241 | 0.190 | 0.190        | 0.007   | 2.75 | 0.020   |
| T7SS14    | T7 | E12 | 0.243 | 0.192 | 0.192        | 0.008   | 2.75 | 0.021   |
| 0         | T7 | F01 | 0     | 0     | kleiner LLOQ | #VALUE! | 1    | #VALUE! |
| 0         | T7 | F02 | 0     | 0     | kleiner LLOQ | #VALUE! | 1    | #VALUE! |
| 0         | T7 | F03 | 0     | 0     | kleiner LLOQ | #VALUE! | 1    | #VALUE! |
| 0         | T7 | F04 | 0     | 0     | kleiner LLOQ | #VALUE! | 1    | #VALUE! |
| T7SS21    | T7 | F05 | 0.246 | 0.195 | 0.195        | 0.008   | 2.75 | 0.021   |
| T7SS21    | T7 | F06 | 0.258 | 0.207 | 0.207        | 0.008   | 2.75 | 0.023   |
| T7SS22    | T7 | F07 | 0.225 | 0.174 | 0.174        | 0.007   | 2.75 | 0.018   |
| T7SS22    | T7 | F08 | 0.260 | 0.210 | 0.210        | 0.008   | 2.75 | 0.023   |
| T7SS23    | T7 | F09 | 0.351 | 0.300 | 0.300        | 0.013   | 2.75 | 0.035   |
| T7SS23    | T7 | F10 | 0.350 | 0.299 | 0.299        | 0.013   | 2.75 | 0.035   |
| T7SS24    | T7 | F11 | 0.431 | 0.380 | 0.380        | 0.016   | 2.75 | 0.045   |
| T7SS24    | T7 | F12 | 0.444 | 0.393 | 0.393        | 0.017   | 2.75 | 0.047   |
| 0         | T7 | G01 | 0     | 0     | kleiner LLOQ | #VALUE! | 1    | #VALUE! |
| 0         | T7 | G02 | 0     | 0     | kleiner LLOQ | #VALUE! | 1    | #VALUE! |
| 0         | T7 | G03 | 0     | 0     | kleiner LLOQ | #VALUE! | 1    | #VALUE! |
| 0         | T7 | G04 | 0     | 0     | kleiner LLOQ | #VALUE! | 1    | #VALUE! |
| 0         | T7 | G05 | 0     | 0     | kleiner LLOQ | #VALUE! | 1    | #VALUE! |
| 0         | T7 | G06 | 0     | 0     | kleiner LLOQ | #VALUE! | 1    | #VALUE! |
| Blank PEG | T7 | G07 | 0     | 0     | kleiner LLOQ | #VALUE! | 2.75 | #VALUE! |

Plate: T7

|   |   |   |   |   |       |       |       |       |       |       |       |       |
|---|---|---|---|---|-------|-------|-------|-------|-------|-------|-------|-------|
|   | 1 | 2 | 3 | 4 | 5     | 6     | 7     | 8     | 9     | 10    | 11    | 12    |
| A |   |   |   |   |       |       |       |       |       |       |       |       |
| B |   |   |   |   |       |       |       |       |       |       |       |       |
| C |   |   |   |   |       |       |       |       |       |       |       |       |
| D |   |   |   |   |       |       | 0.494 | 0.470 | 0.771 | 0.761 | 0.487 | 0.504 |
| E |   |   |   |   | 0.355 | 0.359 | 0.315 | 0.311 | 0.190 | 0.179 | 0.241 | 0.243 |
| F |   |   |   |   | 0.246 | 0.258 | 0.225 | 0.260 | 0.351 | 0.350 | 0.431 | 0.444 |
| G |   |   |   |   |       |       | 0.051 | 0.051 | 0.051 | 0.053 | 0.052 | 0.051 |
| H |   |   |   |   |       |       | 0.050 | 0.050 | 0.050 | 0.050 | 0.050 | 0.050 |

Plattenbelegung

|   |   |   |   |   |        |        |              |              |              |              |              |              |
|---|---|---|---|---|--------|--------|--------------|--------------|--------------|--------------|--------------|--------------|
|   | 1 | 2 | 3 | 4 | 5      | 6      | 7            | 8            | 9            | 10           | 11           | 12           |
| A |   |   |   |   |        |        |              |              |              |              |              |              |
| B |   |   |   |   |        |        |              |              |              |              |              |              |
| C |   |   |   |   |        |        |              |              |              |              |              |              |
| D |   |   |   |   |        |        | T7SN2        | T7SN2        | T7SN3        | T7SN3        | T7SN4        | T7SN4        |
| E |   |   |   |   | T7SS11 | T7SS11 | T7SS12       | T7SS12       | T7SS13       | T7SS13       | T7SS14       | T7SS14       |
| F |   |   |   |   | T7SS21 | T7SS21 | T7SS22       | T7SS22       | T7SS23       | T7SS23       | T7SS24       | T7SS24       |
| G |   |   |   |   |        |        | Blank PEG    | Blank PEG    | Blank PEG    | Blank PEG    | Blank PEG    | Blank PEG    |
| H |   |   |   |   |        |        | Blank no PEG | Blank no PEG | Blank no PEG | Blank no PEG | Blank no PEG | Blank no PEG |

Comment:

Date Operator Date Control

|              |    |     |   |   |              |         |      |         |
|--------------|----|-----|---|---|--------------|---------|------|---------|
| Blank PEG    | T7 | G08 | 0 | 0 | kleiner LLOQ | #VALUE! | 2.75 | #VALUE! |
| Blank PEG    | T7 | G09 | 0 | 0 | kleiner LLOQ | #VALUE! | 2.75 | #VALUE! |
| Blank PEG    | T7 | G10 | 0 | 0 | kleiner LLOQ | #VALUE! | 2.75 | #VALUE! |
| Blank PEG    | T7 | G11 | 0 | 0 | kleiner LLOQ | #VALUE! | 2.75 | #VALUE! |
| Blank PEG    | T7 | G12 | 0 | 0 | kleiner LLOQ | #VALUE! | 2.75 | #VALUE! |
| 0            | T7 | H01 | 0 | 0 | kleiner LLOQ | #VALUE! | 1    | #VALUE! |
| 0            | T7 | H02 | 0 | 0 | kleiner LLOQ | #VALUE! | 1    | #VALUE! |
| 0            | T7 | H03 | 0 | 0 | kleiner LLOQ | #VALUE! | 1    | #VALUE! |
| 0            | T7 | H04 | 0 | 0 | kleiner LLOQ | #VALUE! | 1    | #VALUE! |
| 0            | T7 | H05 | 0 | 0 | kleiner LLOQ | #VALUE! | 1    | #VALUE! |
| 0            | T7 | H06 | 0 | 0 | kleiner LLOQ | #VALUE! | 1    | #VALUE! |
| Blank no PEG | T7 | H07 | 0 | 0 | kleiner LLOQ | #VALUE! | 2.75 | #VALUE! |
| Blank no PEG | T7 | H08 | 0 | 0 | kleiner LLOQ | #VALUE! | 2.75 | #VALUE! |
| Blank no PEG | T7 | H09 | 0 | 0 | kleiner LLOQ | #VALUE! | 2.75 | #VALUE! |
| Blank no PEG | T7 | H10 | 0 | 0 | kleiner LLOQ | #VALUE! | 2.75 | #VALUE! |
| Blank no PEG | T7 | H11 | 0 | 0 | kleiner LLOQ | #VALUE! | 2.75 | #VALUE! |
| Blank no PEG | T7 | H12 | 0 | 0 | kleiner LLOQ | #VALUE! | 2.75 | #VALUE! |

|                    |              |                            |                         |                         |                              |
|--------------------|--------------|----------------------------|-------------------------|-------------------------|------------------------------|
| Project number     | F-120        | Apparatus                  | Wallac Victor           | Operator                | IsBa                         |
| GLP Study (Number) | n.a.         | Protocol (Instrument meth) | LDH test 2016           | Date of preparation     | 19-04-18                     |
| hot substance      | isotope      | n.a.                       | File name (results)     | IsBa_180419/20_LDH_full | Date of measurement          |
|                    | name         | n.a.                       | Kind of well plate      | 96 well                 | shaking time [min]           |
| cold substance     | ACB-ID       | n.a.                       | sample volume [µL]      | 100                     | stirring rate (Target) [rpm] |
|                    | Batch number | n.a.                       | Cocktail volume [µL]    | 175                     | Kind of measurement          |
| n.a.               | name         | LDH                        | ACB-ID of cocktail      |                         | Wave length [nm]             |
|                    | ACB-ID       | L23982R                    | Matrix                  | DMEM (from powder)+PE   | Remarks                      |
| n.a.               | Batch number | SLBK6345V                  | Blank description       | DMEM/PEG, H2O           | Remarks                      |
|                    |              |                            | Pipettes (No. / volume) | 50-200µl                | Remarks                      |
| n.a.               | n.a.         | Pipettes (No. / volume)    | n.a.                    | Remarks                 | n.a.                         |

Messdaten (diese Tabelle in Bericht übernehmen)

| Sample name * | concentration (theor.) * | measured data | measured data | measured data | mean measured | SD   | RSD  | Blank * | measured data after * | concentration (calc.) * | Deviation * | Residuen |
|---------------|--------------------------|---------------|---------------|---------------|---------------|------|------|---------|-----------------------|-------------------------|-------------|----------|
|               | [µg/mL]                  | [AU]          | [AU]          | [AU]          | [AU]          | [AU] | [%]  | [AU]    | Blank subtraction     | [µg/mL]                 | [%]         |          |
| KLP1          | 0.148                    | 1.579         | 1.652         | 1.627         | 1.62          | 0.03 | 1.87 | 0.047   | 1.568                 | 0.148                   | -0.24       | 0.00     |
| KLP2          | 0.114                    | 1.357         | 1.443         | 1.372         | 1.39          | 0.04 | 2.70 | 0.054   | 1.340                 | 0.110                   | -3.40       | 0.00     |
| KLP3          | 0.074                    | 1.272         | 1.193         | 1.228         | 1.23          | 0.03 | 2.63 | 0.051   | 1.180                 | 0.084                   | 13.04       | 0.01     |
| KLP4          | 0.041                    | 0.959         | 0.972         | 0.883         | 0.94          | 0.04 | 4.19 | 0.051   | 0.887                 | 0.035                   | -13.32      | -0.01    |
| KLP5          |                          |               |               |               |               |      |      | 0.052   |                       |                         |             |          |
| KLP6          |                          |               |               |               |               |      |      | 0.051   |                       |                         |             |          |
| KLP7          |                          |               |               |               |               |      |      |         |                       |                         |             |          |
| KLP8          |                          |               |               |               |               |      |      |         |                       |                         |             |          |

Statistical data

|                                              |                                          |                     |             |
|----------------------------------------------|------------------------------------------|---------------------|-------------|
| Geradensteigung                              | Slope                                    | m                   | 6.05        |
| Y-Achsenabschnitt                            | Y-intercept                              | b                   | 0.67        |
| Standardabw. Geradensteigung                 | SD-Slope                                 | S <sub>m</sub>      | 0.620291227 |
| Standardabw. Achsenabschnittes               | SD-Y-Intercept                           | S <sub>b</sub>      | 0.063894294 |
| Anzahl Messpunkte                            | number of measuring points               | n                   | 4           |
| Quadratsumme                                 | sum of squares                           | Q <sub>xx</sub>     | 0.006578604 |
| Bereichsmittle                               |                                          | f                   | 0.094336926 |
| Freiheitsgrade                               | degree of freedom                        | f                   | 2           |
| Student-t-Faktor für (P = 95 %; f = n-2)     | Student-t-factor for (P = 95 %; f = n-2) | t                   | 4.303       |
| Vertrauensbereich Steig. (95 %) Obergrenze   |                                          | m + VB <sub>m</sub> | 8.722319627 |
| Vertrauensbereich Steig. (95 %) Untergrenze  |                                          | m - VB <sub>m</sub> | 3.384093228 |
| Vertrauensbereich Achsenabschnitt (95 %) Og. |                                          | b + VB <sub>b</sub> | 0.946914615 |
| Vertrauensbereich Achsenabschnitt (95 %) Ug. |                                          | b - VB <sub>b</sub> | 0.398761518 |
| Korrelationskoeffizient                      | correlation coefficient                  | r                   | 0.9897      |
| Bestimmtheitsmaß                             | determination coefficient                | r <sup>2</sup>      | 0.9794      |
| Reststandardabweichung                       |                                          | S <sub>0</sub>      | 0.050310948 |
| Summe Restquadrat                            |                                          | sd                  | 2.895683345 |
| Verfahrensstandardabw.                       |                                          | S <sub>0p</sub>     | 0.008311454 |
| Rel. Verfahrensstandardabw. %                |                                          | V <sub>0p</sub>     | 8.810393374 |

|                          |       |
|--------------------------|-------|
| mean Blank               | 0     |
| SD Blank                 | 0.00  |
| RSD Blank                | 3.79  |
| x <sup>2</sup> SD (LLOQ) | 0     |
| x <sup>2</sup> SD (LOD)  | 0     |
| LLOQ (AU)                | 0     |
| LOD (AU)                 | 0     |
| LLOQ                     | 1.568 |
| LLOQ (Lin)               | 0.887 |

Evaluation / Comment

LDH linearity valid with 7 standards, split in lin high and lin low, each with 4 standards and KLP4 common standard for both. R<sup>2</sup> 0,9981, deviations for both between -13.34% and +13.04%

Date

Operator

Date

Control

Figure 1 Linearity

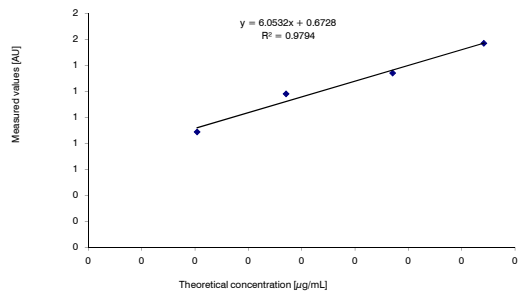

Figure 2 Method validation Residuen Plot



Evaluation / Comment

lin passed

Date

Operator

Date

Control

| Sample name | Plate | Position | [AU]  | [AU]-Blank | Rating       | [µg/mL] | Dilution factor | [µg/mL] |
|-------------|-------|----------|-------|------------|--------------|---------|-----------------|---------|
| 0           | T4    | A01      | 0     | 0          | kleiner LLOQ | #VALUE! | 1               | #VALUE! |
| 0           | T4    | A02      | 0     | 0          | kleiner LLOQ | #VALUE! | 1               | #VALUE! |
| 0           | T4    | A03      | 0     | 0          | kleiner LLOQ | #VALUE! | 1               | #VALUE! |
| 0           | T4    | A04      | 0     | 0          | kleiner LLOQ | #VALUE! | 1               | #VALUE! |
| 0           | T4    | A05      | 0.000 | -0.051     | kleiner LLOQ | #VALUE! | 1               | #VALUE! |
| 0           | T4    | A06      | 0.000 | -0.051     | kleiner LLOQ | #VALUE! | 1               | #VALUE! |
| 0           | T4    | A07      | 0     | 0          | kleiner LLOQ | #VALUE! | 1               | #VALUE! |
| 0           | T4    | A08      | 0     | 0          | kleiner LLOQ | #VALUE! | 1               | #VALUE! |
| 0           | T4    | A09      | 0.000 | -0.051     | kleiner LLOQ | #VALUE! | 1               | #VALUE! |
| 0           | T4    | A10      | 0.000 | -0.051     | kleiner LLOQ | #VALUE! | 1               | #VALUE! |
| 0           | T4    | A11      | 0     | 0          | kleiner LLOQ | #VALUE! | 1               | #VALUE! |
| 0           | T4    | A12      | 0     | 0          | kleiner LLOQ | #VALUE! | 1               | #VALUE! |
| 0           | T4    | B01      | 0     | 0          | kleiner LLOQ | #VALUE! | 1               | #VALUE! |
| 0           | T4    | B02      | 0     | 0          | kleiner LLOQ | #VALUE! | 1               | #VALUE! |
| 0           | T4    | B03      | 0     | 0          | kleiner LLOQ | #VALUE! | 1               | #VALUE! |
| 0           | T4    | B04      | 0     | 0          | kleiner LLOQ | #VALUE! | 1               | #VALUE! |
| 0           | T4    | B05      | 0     | 0          | kleiner LLOQ | #VALUE! | 1               | #VALUE! |
| 0           | T4    | B06      | 0.000 | -0.051     | kleiner LLOQ | #VALUE! | 1               | #VALUE! |
| 0           | T4    | B07      | 0.000 | -0.051     | kleiner LLOQ | #VALUE! | 1               | #VALUE! |
| 0           | T4    | B08      | 0.000 | -0.051     | kleiner LLOQ | #VALUE! | 1               | #VALUE! |
| 0           | T4    | B09      | 0     | 0          | kleiner LLOQ | #VALUE! | 1               | #VALUE! |
| 0           | T4    | B10      | 0     | 0          | kleiner LLOQ | #VALUE! | 1               | #VALUE! |
| 0           | T4    | B11      | 0     | 0          | kleiner LLOQ | #VALUE! | 1               | #VALUE! |
| 0           | T4    | B12      | 0     | 0          | kleiner LLOQ | #VALUE! | 1               | #VALUE! |
| 0           | T4    | C01      | 0     | 0          | kleiner LLOQ | #VALUE! | 1               | #VALUE! |
| 0           | T4    | C02      | 0     | 0          | kleiner LLOQ | #VALUE! | 1               | #VALUE! |
| 0           | T4    | C03      | 0     | 0          | kleiner LLOQ | #VALUE! | 1               | #VALUE! |
| 0           | T4    | C04      | 0     | 0          | kleiner LLOQ | #VALUE! | 1               | #VALUE! |
| 0           | T4    | C05      | 0.000 | -0.051     | kleiner LLOQ | #VALUE! | 1               | #VALUE! |
| 0           | T4    | C06      | 0.000 | -0.051     | kleiner LLOQ | #VALUE! | 1               | #VALUE! |
| 0           | T4    | C07      | 0.000 | -0.051     | kleiner LLOQ | #VALUE! | 1               | #VALUE! |
| 0           | T4    | C08      | 0.000 | -0.051     | kleiner LLOQ | #VALUE! | 1               | #VALUE! |
| 0           | T4    | C09      | 0.000 | -0.051     | kleiner LLOQ | #VALUE! | 1               | #VALUE! |
| 0           | T4    | C10      | 0.000 | -0.051     | kleiner LLOQ | #VALUE! | 1               | #VALUE! |
| 0           | T4    | C11      | 0     | 0          | kleiner LLOQ | #VALUE! | 1               | #VALUE! |
| 0           | T4    | C12      | 0     | 0          | kleiner LLOQ | #VALUE! | 1               | #VALUE! |
| 0           | T4    | D01      | 0     | 0          | kleiner LLOQ | #VALUE! | 1               | #VALUE! |
| 0           | T4    | D02      | 0     | 0          | kleiner LLOQ | #VALUE! | 1               | #VALUE! |
| 0           | T4    | D03      | 0     | 0          | kleiner LLOQ | #VALUE! | 1               | #VALUE! |
| 0           | T4    | D04      | 0     | 0          | kleiner LLOQ | #VALUE! | 1               | #VALUE! |
| 0           | T4    | D05      | 0     | 0          | kleiner LLOQ | #VALUE! | 1               | #VALUE! |
| 0           | T4    | D06      | 0     | 0          | kleiner LLOQ | #VALUE! | 1               | #VALUE! |
| 0           | T4    | D07      | 0     | 0          | kleiner LLOQ | #VALUE! | 1               | #VALUE! |
| 0           | T4    | D08      | 0     | 0          | kleiner LLOQ | #VALUE! | 1               | #VALUE! |
| 0           | T4    | D09      | 0     | 0          | kleiner LLOQ | #VALUE! | 1               | #VALUE! |
| 0           | T4    | D10      | 0     | 0          | kleiner LLOQ | #VALUE! | 1               | #VALUE! |
| 0           | T4    | D11      | 0     | 0          | kleiner LLOQ | #VALUE! | 1               | #VALUE! |
| 0           | T4    | D12      | 0     | 0          | kleiner LLOQ | #VALUE! | 1               | #VALUE! |
| T4SN2       | T4    | D07      | 0     | 0          | kleiner LLOQ | #VALUE! | 1               | #VALUE! |
| T4SN2       | T4    | D08      | 0     | 0          | kleiner LLOQ | #VALUE! | 1               | #VALUE! |
| T4SN3       | T4    | D09      | 0     | 0          | kleiner LLOQ | #VALUE! | 1               | #VALUE! |
| T4SN3       | T4    | D10      | 0     | 0          | kleiner LLOQ | #VALUE! | 1               | #VALUE! |
| T4SN4       | T4    | D11      | 0     | 0          | kleiner LLOQ | #VALUE! | 1               | #VALUE! |
| T4SN4       | T4    | D12      | 0     | 0          | kleiner LLOQ | #VALUE! | 1               | #VALUE! |

  

|           |   |   |   |   |   |   |   |       |       |       |       |       |
|-----------|---|---|---|---|---|---|---|-------|-------|-------|-------|-------|
| Plate: T4 |   |   |   |   |   |   |   |       |       |       |       |       |
|           | 1 | 2 | 3 | 4 | 5 | 6 | 7 | 8     | 9     | 10    | 11    | 12    |
| A         |   |   |   |   |   |   |   |       |       |       |       |       |
| B         |   |   |   |   |   |   |   |       |       |       |       |       |
| C         |   |   |   |   |   |   |   |       |       |       |       |       |
| D         |   |   |   |   |   |   |   |       |       |       |       |       |
| E         |   |   |   |   |   |   |   |       |       |       | 1.258 | 1.343 |
| F         |   |   |   |   |   |   |   |       |       |       |       |       |
| G         |   |   |   |   |   |   |   | 0.052 | 0.054 | 0.052 | 0.052 | 0.052 |
| H         |   |   |   |   |   |   |   | 0.050 | 0.050 | 0.053 | 0.050 | 0.051 |

  

|                 |   |   |   |   |        |        |              |              |              |              |              |              |
|-----------------|---|---|---|---|--------|--------|--------------|--------------|--------------|--------------|--------------|--------------|
| Plattenbelegung |   |   |   |   |        |        |              |              |              |              |              |              |
|                 | 1 | 2 | 3 | 4 | 5      | 6      | 7            | 8            | 9            | 10           | 11           | 12           |
| A               |   |   |   |   |        |        |              |              |              |              |              |              |
| B               |   |   |   |   |        |        |              |              |              |              |              |              |
| C               |   |   |   |   |        |        |              |              |              |              |              |              |
| D               |   |   |   |   |        |        | T4SN2        | T4SN2        | T4SN3        | T4SN3        | T4SN4        | T4SN4        |
| E               |   |   |   |   | T4SS11 | T4SS11 | T4SS12       | T4SS12       | T4SS13       | T4SS13       | T4SS14       | T4SS14       |
| F               |   |   |   |   | T4SS21 | T4SS21 | T4SS22       | T4SS22       | T4SS23       | T4SS23       | T4SS24       | T4SS24       |
| G               |   |   |   |   |        |        | Blank PEG    | Blank PEG    | Blank PEG    | Blank PEG    | Blank PEG    | Blank PEG    |
| H               |   |   |   |   |        |        | Blank no PEG | Blank no PEG | Blank no PEG | Blank no PEG | Blank no PEG | Blank no PEG |

  

Comment:  
Erste 4 Reihen immer Testmessung zur Evaluierung der benötigten Verdünnung. Wird nicht mit ausgewertet. Unverdünte Messungen außerhalb der Linearität werden ebenfalls nicht ausgewertet. Dil.Faktor unverdünte samples=2,75 (100µl sample+100µlRM+75µl stop sol.) Verdünnung Dil.8 Dil8\*Dil2,75=Dil.22. Rot= 2\* verdünnt, Dil4 und Dil 8, also Dil 2,75\*Dil8\*Dil4=Dil88

Samples aufgeteilt in lin high und low;niedriger konzentrierte Samples bei lin low zu finden.

Date Operator \_\_\_\_\_ Date Control \_\_\_\_\_



|              |    |     |     |     |              |         |      |         |
|--------------|----|-----|-----|-----|--------------|---------|------|---------|
| 0            | T4 | E01 | 0   | 0   | kleiner LLOQ | #VALUE! | 1    | #VALUE! |
| 0            | T4 | E02 | 0   | 0   | kleiner LLOQ | #VALUE! | 1    | #VALUE! |
| 0            | T4 | E03 | 0   | 0   | kleiner LLOQ | #VALUE! | 1    | #VALUE! |
| 0            | T4 | E04 | 0   | 0   | kleiner LLOQ | #VALUE! | 1    | #VALUE! |
| T4SS11       | T4 | E05 | 0   | 0   | kleiner LLOQ | #VALUE! | 1    | #VALUE! |
| T4SS11       | T4 | E06 | 0   | 0   | kleiner LLOQ | #VALUE! | 1    | #VALUE! |
| T4SS12       | T4 | E07 | 0   | 0   | kleiner LLOQ | #VALUE! | 1    | #VALUE! |
| T4SS12       | T4 | E08 | 0   | 0   | kleiner LLOQ | #VALUE! | 1    | #VALUE! |
| T4SS13       | T4 | E09 | 0   | 0   | kleiner LLOQ | #VALUE! | 1    | #VALUE! |
| T4SS13       | T4 | E10 | 0   | 0   | kleiner LLOQ | #VALUE! | 1    | #VALUE! |
| T4SS14       | T4 | E11 | 1.3 | 1.2 | 1.2          | 0.1     | 2.75 | 0.243   |
| T4SS14       | T4 | E12 | 1.3 | 1.3 | 1.3          | 0.1     | 2.75 | 0.281   |
| 0            | T4 | F01 | 0   | 0   | kleiner LLOQ | #VALUE! | 1    | #VALUE! |
| 0            | T4 | F02 | 0   | 0   | kleiner LLOQ | #VALUE! | 1    | #VALUE! |
| 0            | T4 | F03 | 0   | 0   | kleiner LLOQ | #VALUE! | 1    | #VALUE! |
| 0            | T4 | F04 | 0   | 0   | kleiner LLOQ | #VALUE! | 1    | #VALUE! |
| T4SS21       | T4 | F05 | 0   | 0   | kleiner LLOQ | #VALUE! | 1    | #VALUE! |
| T4SS21       | T4 | F06 | 0   | 0   | kleiner LLOQ | #VALUE! | 1    | #VALUE! |
| T4SS22       | T4 | F07 | 0   | 0   | kleiner LLOQ | #VALUE! | 1    | #VALUE! |
| T4SS22       | T4 | F08 | 0   | 0   | kleiner LLOQ | #VALUE! | 1    | #VALUE! |
| T4SS23       | T4 | F09 | 0   | 0   | kleiner LLOQ | #VALUE! | 1    | #VALUE! |
| T4SS23       | T4 | F10 | 0   | 0   | kleiner LLOQ | #VALUE! | 1    | #VALUE! |
| T4SS24       | T4 | F11 | 0   | 0   | kleiner LLOQ | #VALUE! | 1    | #VALUE! |
| T4SS24       | T4 | F12 | 0   | 0   | kleiner LLOQ | #VALUE! | 1    | #VALUE! |
| 0            | T4 | G01 | 0   | 0   | kleiner LLOQ | #VALUE! | 1    | #VALUE! |
| 0            | T4 | G02 | 0   | 0   | kleiner LLOQ | #VALUE! | 1    | #VALUE! |
| 0            | T4 | G03 | 0   | 0   | kleiner LLOQ | #VALUE! | 1    | #VALUE! |
| 0            | T4 | G04 | 0   | 0   | kleiner LLOQ | #VALUE! | 1    | #VALUE! |
| 0            | T4 | G05 | 0   | 0   | kleiner LLOQ | #VALUE! | 1    | #VALUE! |
| 0            | T4 | G06 | 0   | 0   | kleiner LLOQ | #VALUE! | 1    | #VALUE! |
| Blank PEG    | T4 | G07 | 0   | 0   | kleiner LLOQ | #VALUE! | 2.75 | #VALUE! |
| Blank PEG    | T4 | G08 | 0   | 0   | kleiner LLOQ | #VALUE! | 2.75 | #VALUE! |
| Blank PEG    | T4 | G09 | 0   | 0   | kleiner LLOQ | #VALUE! | 2.75 | #VALUE! |
| Blank PEG    | T4 | G10 | 0   | 0   | kleiner LLOQ | #VALUE! | 2.75 | #VALUE! |
| Blank PEG    | T4 | G11 | 0   | 0   | kleiner LLOQ | #VALUE! | 2.75 | #VALUE! |
| Blank PEG    | T4 | G12 | 0   | 0   | kleiner LLOQ | #VALUE! | 2.75 | #VALUE! |
| 0            | T4 | H01 | 0   | 0   | kleiner LLOQ | #VALUE! | 1    | #VALUE! |
| 0            | T4 | H02 | 0   | 0   | kleiner LLOQ | #VALUE! | 1    | #VALUE! |
| 0            | T4 | H03 | 0   | 0   | kleiner LLOQ | #VALUE! | 1    | #VALUE! |
| 0            | T4 | H04 | 0   | 0   | kleiner LLOQ | #VALUE! | 1    | #VALUE! |
| 0            | T4 | H05 | 0   | 0   | kleiner LLOQ | #VALUE! | 1    | #VALUE! |
| 0            | T4 | H06 | 0   | 0   | kleiner LLOQ | #VALUE! | 1    | #VALUE! |
| Blank no PEG | T4 | H07 | 0   | 0   | kleiner LLOQ | #VALUE! | 2.75 | #VALUE! |
| Blank no PEG | T4 | H08 | 0   | 0   | kleiner LLOQ | #VALUE! | 2.75 | #VALUE! |
| Blank no PEG | T4 | H09 | 0   | 0   | kleiner LLOQ | #VALUE! | 2.75 | #VALUE! |
| Blank no PEG | T4 | H10 | 0   | 0   | kleiner LLOQ | #VALUE! | 2.75 | #VALUE! |
| Blank no PEG | T4 | H11 | 0   | 0   | kleiner LLOQ | #VALUE! | 2.75 | #VALUE! |
| Blank no PEG | T4 | H12 | 0   | 0   | kleiner LLOQ | #VALUE! | 2.75 | #VALUE! |

|       |    |     |       |              |         |       |         |       |
|-------|----|-----|-------|--------------|---------|-------|---------|-------|
| 0     | T5 | A01 | 0     | kleiner LLOQ | #VALUE! | 1     | #VALUE! |       |
| 0     | T5 | A02 | 0     | kleiner LLOQ | #VALUE! | 1     | #VALUE! |       |
| 0     | T5 | A03 | 0     | kleiner LLOQ | #VALUE! | 1     | #VALUE! |       |
| 0     | T5 | A04 | 0     | kleiner LLOQ | #VALUE! | 1     | #VALUE! |       |
| 0     | T5 | A05 | 0     | kleiner LLOQ | #VALUE! | 1     | #VALUE! |       |
| 0     | T5 | A06 | 0     | kleiner LLOQ | #VALUE! | 1     | #VALUE! |       |
| 0     | T5 | A07 | 0     | kleiner LLOQ | #VALUE! | 1     | #VALUE! |       |
| 0     | T5 | A08 | 0     | kleiner LLOQ | #VALUE! | 1     | #VALUE! |       |
| 0     | T5 | A09 | 0     | kleiner LLOQ | #VALUE! | 1     | #VALUE! |       |
| 0     | T5 | A10 | 0     | kleiner LLOQ | #VALUE! | 1     | #VALUE! |       |
| 0     | T5 | A11 | 0     | kleiner LLOQ | #VALUE! | 1     | #VALUE! |       |
| 0     | T5 | A12 | 0     | kleiner LLOQ | #VALUE! | 1     | #VALUE! |       |
| 0     | T5 | B01 | 0     | kleiner LLOQ | #VALUE! | 1     | #VALUE! |       |
| 0     | T5 | B02 | 0     | kleiner LLOQ | #VALUE! | 1     | #VALUE! |       |
| 0     | T5 | B03 | 0     | kleiner LLOQ | #VALUE! | 1     | #VALUE! |       |
| 0     | T5 | B04 | 0     | kleiner LLOQ | #VALUE! | 1     | #VALUE! |       |
| 0     | T5 | B05 | 0     | kleiner LLOQ | #VALUE! | 1     | #VALUE! |       |
| 0     | T5 | B06 | 0     | kleiner LLOQ | #VALUE! | 1     | #VALUE! |       |
| 0     | T5 | B07 | 0     | kleiner LLOQ | #VALUE! | 1     | #VALUE! |       |
| 0     | T5 | B08 | 0     | kleiner LLOQ | #VALUE! | 1     | #VALUE! |       |
| 0     | T5 | B09 | 0     | kleiner LLOQ | #VALUE! | 1     | #VALUE! |       |
| 0     | T5 | B10 | 0     | kleiner LLOQ | #VALUE! | 1     | #VALUE! |       |
| 0     | T5 | B11 | 0     | kleiner LLOQ | #VALUE! | 1     | #VALUE! |       |
| 0     | T5 | B12 | 0     | kleiner LLOQ | #VALUE! | 1     | #VALUE! |       |
| 0     | T5 | C01 | 0     | kleiner LLOQ | #VALUE! | 1     | #VALUE! |       |
| 0     | T5 | C02 | 0     | kleiner LLOQ | #VALUE! | 1     | #VALUE! |       |
| 0     | T5 | C03 | 0     | kleiner LLOQ | #VALUE! | 1     | #VALUE! |       |
| 0     | T5 | C04 | 0     | kleiner LLOQ | #VALUE! | 1     | #VALUE! |       |
| 0     | T5 | C05 | 0     | kleiner LLOQ | #VALUE! | 1     | #VALUE! |       |
| 0     | T5 | C06 | 0     | kleiner LLOQ | #VALUE! | 1     | #VALUE! |       |
| 0     | T5 | C07 | 0     | kleiner LLOQ | #VALUE! | 1     | #VALUE! |       |
| 0     | T5 | C08 | 0     | kleiner LLOQ | #VALUE! | 1     | #VALUE! |       |
| 0     | T5 | C09 | 0     | kleiner LLOQ | #VALUE! | 1     | #VALUE! |       |
| 0     | T5 | C10 | 0     | kleiner LLOQ | #VALUE! | 1     | #VALUE! |       |
| 0     | T5 | C11 | 0     | kleiner LLOQ | #VALUE! | 1     | #VALUE! |       |
| 0     | T5 | C12 | 0     | kleiner LLOQ | #VALUE! | 1     | #VALUE! |       |
| 0     | T5 | D01 | 0     | kleiner LLOQ | #VALUE! | 1     | #VALUE! |       |
| 0     | T5 | D02 | 0     | kleiner LLOQ | #VALUE! | 1     | #VALUE! |       |
| 0     | T5 | D03 | 0     | kleiner LLOQ | #VALUE! | 1     | #VALUE! |       |
| 0     | T5 | D04 | 0     | kleiner LLOQ | #VALUE! | 1     | #VALUE! |       |
| 0     | T5 | D05 | 0     | kleiner LLOQ | #VALUE! | 1     | #VALUE! |       |
| 0     | T5 | D06 | 0     | kleiner LLOQ | #VALUE! | 1     | #VALUE! |       |
| 0     | T5 | D07 | 0     | kleiner LLOQ | #VALUE! | 1     | #VALUE! |       |
| T5SN2 | T5 | D08 | 0     | kleiner LLOQ | #VALUE! | 1     | #VALUE! |       |
| T5SN3 | T5 | D09 | 1.131 | 1.080        | 1.080   | 0.067 | 2.75    | 0.185 |
| T5SN3 | T5 | D10 | 1.140 | 1.089        | 1.089   | 0.069 | 2.75    | 0.189 |
| T5SN4 | T5 | D11 | 0     | kleiner LLOQ | #VALUE! | 1     | #VALUE! |       |
| T5SN4 | T5 | D12 | 0     | kleiner LLOQ | #VALUE! | 1     | #VALUE! |       |

Plate: T5

|   |   |   |   |   |   |   |   |       |       |       |       |       |       |
|---|---|---|---|---|---|---|---|-------|-------|-------|-------|-------|-------|
|   | 1 | 2 | 3 | 4 | 5 | 6 | 7 | 8     | 9     | 10    | 11    | 12    |       |
| A |   |   |   |   |   |   |   |       |       |       |       |       |       |
| B |   |   |   |   |   |   |   |       |       |       |       |       |       |
| C |   |   |   |   |   |   |   |       |       |       |       |       |       |
| D |   |   |   |   |   |   |   |       | 1.131 | 1.140 |       |       |       |
| E |   |   |   |   |   |   |   |       |       |       |       |       |       |
| F |   |   |   |   |   |   |   |       |       |       |       |       |       |
| G |   |   |   |   |   |   |   | 0.053 | 0.053 | 0.054 | 0.053 | 0.053 | 0.052 |
| H |   |   |   |   |   |   |   | 0.101 | 0.056 | 0.052 | 0.050 | 0.054 | 0.053 |

Plattenbelegung

|   |   |   |   |   |        |        |        |              |              |              |              |              |              |
|---|---|---|---|---|--------|--------|--------|--------------|--------------|--------------|--------------|--------------|--------------|
|   | 1 | 2 | 3 | 4 | 5      | 6      | 7      | 8            | 9            | 10           | 11           | 12           |              |
| A |   |   |   |   |        |        |        |              |              |              |              |              |              |
| B |   |   |   |   |        |        |        |              |              |              |              |              |              |
| C |   |   |   |   |        |        |        |              |              |              |              |              |              |
| D |   |   |   |   |        |        |        | T5SN2        | T5SN2        | T5SN3        | T5SN3        | T5SN4        | T5SN4        |
| E |   |   |   |   | T5SS11 | T5SS11 | T5SS12 | T5SS12       | T5SS13       | T5SS13       | T5SS14       | T5SS14       |              |
| F |   |   |   |   | T5SS21 | T5SS21 | T5SS22 | T5SS22       | T5SS23       | T5SS23       | T5SS24       | T5SS24       |              |
| G |   |   |   |   |        |        |        | Blank PEG    | Blank PEG    | Blank PEG    | Blank PEG    | Blank PEG    | Blank PEG    |
| H |   |   |   |   |        |        |        | Blank no PEG | Blank no PEG | Blank no PEG | Blank no PEG | Blank no PEG | Blank no PEG |

Comment:

Date Operator Date Control

|              |    |     |   |   |              |         |      |         |
|--------------|----|-----|---|---|--------------|---------|------|---------|
| 0            | T5 | E01 | 0 | 0 | kleiner LLOQ | #VALUE! | 1    | #VALUE! |
| 0            | T5 | E02 | 0 | 0 | kleiner LLOQ | #VALUE! | 1    | #VALUE! |
| 0            | T5 | E03 | 0 | 0 | kleiner LLOQ | #VALUE! | 1    | #VALUE! |
| 0            | T5 | E04 | 0 | 0 | kleiner LLOQ | #VALUE! | 1    | #VALUE! |
| T5SS11       | T5 | E05 | 0 | 0 | kleiner LLOQ | #VALUE! | 1    | #VALUE! |
| T5SS11       | T5 | E06 | 0 | 0 | kleiner LLOQ | #VALUE! | 1    | #VALUE! |
| T5SS12       | T5 | E07 | 0 | 0 | kleiner LLOQ | #VALUE! | 1    | #VALUE! |
| T5SS12       | T5 | E08 | 0 | 0 | kleiner LLOQ | #VALUE! | 1    | #VALUE! |
| T5SS13       | T5 | E09 | 0 | 0 | kleiner LLOQ | #VALUE! | 1    | #VALUE! |
| T5SS13       | T5 | E10 | 0 | 0 | kleiner LLOQ | #VALUE! | 1    | #VALUE! |
| T5SS14       | T5 | E11 | 0 | 0 | kleiner LLOQ | #VALUE! | 1    | #VALUE! |
| T5SS14       | T5 | E12 | 0 | 0 | kleiner LLOQ | #VALUE! | 1    | #VALUE! |
| 0            | T5 | F01 | 0 | 0 | kleiner LLOQ | #VALUE! | 1    | #VALUE! |
| 0            | T5 | F02 | 0 | 0 | kleiner LLOQ | #VALUE! | 1    | #VALUE! |
| 0            | T5 | F03 | 0 | 0 | kleiner LLOQ | #VALUE! | 1    | #VALUE! |
| 0            | T5 | F04 | 0 | 0 | kleiner LLOQ | #VALUE! | 1    | #VALUE! |
| T5SS21       | T5 | F05 | 0 | 0 | kleiner LLOQ | #VALUE! | 1    | #VALUE! |
| T5SS21       | T5 | F06 | 0 | 0 | kleiner LLOQ | #VALUE! | 1    | #VALUE! |
| T5SS22       | T5 | F07 | 0 | 0 | kleiner LLOQ | #VALUE! | 1    | #VALUE! |
| T5SS22       | T5 | F08 | 0 | 0 | kleiner LLOQ | #VALUE! | 1    | #VALUE! |
| T5SS23       | T5 | F09 | 0 | 0 | kleiner LLOQ | #VALUE! | 1    | #VALUE! |
| T5SS23       | T5 | F10 | 0 | 0 | kleiner LLOQ | #VALUE! | 1    | #VALUE! |
| T5SS24       | T5 | F11 | 0 | 0 | kleiner LLOQ | #VALUE! | 1    | #VALUE! |
| T5SS24       | T5 | F12 | 0 | 0 | kleiner LLOQ | #VALUE! | 1    | #VALUE! |
| 0            | T5 | G01 | 0 | 0 | kleiner LLOQ | #VALUE! | 1    | #VALUE! |
| 0            | T5 | G02 | 0 | 0 | kleiner LLOQ | #VALUE! | 1    | #VALUE! |
| 0            | T5 | G03 | 0 | 0 | kleiner LLOQ | #VALUE! | 1    | #VALUE! |
| 0            | T5 | G04 | 0 | 0 | kleiner LLOQ | #VALUE! | 1    | #VALUE! |
| 0            | T5 | G05 | 0 | 0 | kleiner LLOQ | #VALUE! | 1    | #VALUE! |
| 0            | T5 | G06 | 0 | 0 | kleiner LLOQ | #VALUE! | 1    | #VALUE! |
| Blank PEG    | T5 | G07 | 0 | 0 | kleiner LLOQ | #VALUE! | 2.75 | #VALUE! |
| Blank PEG    | T5 | G08 | 0 | 0 | kleiner LLOQ | #VALUE! | 2.75 | #VALUE! |
| Blank PEG    | T5 | G09 | 0 | 0 | kleiner LLOQ | #VALUE! | 2.75 | #VALUE! |
| Blank PEG    | T5 | G10 | 0 | 0 | kleiner LLOQ | #VALUE! | 2.75 | #VALUE! |
| Blank PEG    | T5 | G11 | 0 | 0 | kleiner LLOQ | #VALUE! | 2.75 | #VALUE! |
| Blank PEG    | T5 | G12 | 0 | 0 | kleiner LLOQ | #VALUE! | 2.75 | #VALUE! |
| 0            | T5 | H01 | 0 | 0 | kleiner LLOQ | #VALUE! | 1    | #VALUE! |
| 0            | T5 | H02 | 0 | 0 | kleiner LLOQ | #VALUE! | 1    | #VALUE! |
| 0            | T5 | H03 | 0 | 0 | kleiner LLOQ | #VALUE! | 1    | #VALUE! |
| 0            | T5 | H04 | 0 | 0 | kleiner LLOQ | #VALUE! | 1    | #VALUE! |
| 0            | T5 | H05 | 0 | 0 | kleiner LLOQ | #VALUE! | 1    | #VALUE! |
| 0            | T5 | H06 | 0 | 0 | kleiner LLOQ | #VALUE! | 1    | #VALUE! |
| Blank no PEG | T5 | H07 | 0 | 0 | kleiner LLOQ | #VALUE! | 2.75 | #VALUE! |
| Blank no PEG | T5 | H08 | 0 | 0 | kleiner LLOQ | #VALUE! | 2.75 | #VALUE! |
| Blank no PEG | T5 | H09 | 0 | 0 | kleiner LLOQ | #VALUE! | 2.75 | #VALUE! |
| Blank no PEG | T5 | H10 | 0 | 0 | kleiner LLOQ | #VALUE! | 2.75 | #VALUE! |
| Blank no PEG | T5 | H11 | 0 | 0 | kleiner LLOQ | #VALUE! | 2.75 | #VALUE! |
| Blank no PEG | T5 | H12 | 0 | 0 | kleiner LLOQ | #VALUE! | 2.75 | #VALUE! |
| 0            | T6 | A01 | 0 | 0 | kleiner LLOQ | #VALUE! | 1    | #VALUE! |
| 0            | T6 | A02 | 0 | 0 | kleiner LLOQ | #VALUE! | 1    | #VALUE! |
| 0            | T6 | A03 | 0 | 0 | kleiner LLOQ | #VALUE! | 1    | #VALUE! |
| 0            | T6 | A04 | 0 | 0 | kleiner LLOQ | #VALUE! | 1    | #VALUE! |
| 0            | T6 | A05 | 0 | 0 | kleiner LLOQ | #VALUE! | 1    | #VALUE! |
| 0            | T6 | A06 | 0 | 0 | kleiner LLOQ | #VALUE! | 1    | #VALUE! |
| 0            | T6 | A07 | 0 | 0 | kleiner LLOQ | #VALUE! | 1    | #VALUE! |
| 0            | T6 | A08 | 0 | 0 | kleiner LLOQ | #VALUE! | 1    | #VALUE! |
| 0            | T6 | A09 | 0 | 0 | kleiner LLOQ | #VALUE! | 1    | #VALUE! |
| 0            | T6 | A10 | 0 | 0 | kleiner LLOQ | #VALUE! | 1    | #VALUE! |
| 0            | T6 | A11 | 0 | 0 | kleiner LLOQ | #VALUE! | 1    | #VALUE! |
| 0            | T6 | A12 | 0 | 0 | kleiner LLOQ | #VALUE! | 1    | #VALUE! |
| 0            | T6 | B01 | 0 | 0 | kleiner LLOQ | #VALUE! | 1    | #VALUE! |
| 0            | T6 | B02 | 0 | 0 | kleiner LLOQ | #VALUE! | 1    | #VALUE! |
| 0            | T6 | B03 | 0 | 0 | kleiner LLOQ | #VALUE! | 1    | #VALUE! |
| 0            | T6 | B04 | 0 | 0 | kleiner LLOQ | #VALUE! | 1    | #VALUE! |
| 0            | T6 | B05 | 0 | 0 | kleiner LLOQ | #VALUE! | 1    | #VALUE! |
| 0            | T6 | B06 | 0 | 0 | kleiner LLOQ | #VALUE! | 1    | #VALUE! |
| 0            | T6 | B07 | 0 | 0 | kleiner LLOQ | #VALUE! | 1    | #VALUE! |
| 0            | T6 | B08 | 0 | 0 | kleiner LLOQ | #VALUE! | 1    | #VALUE! |
| 0            | T6 | B09 | 0 | 0 | kleiner LLOQ | #VALUE! | 1    | #VALUE! |
| 0            | T6 | B10 | 0 | 0 | kleiner LLOQ | #VALUE! | 1    | #VALUE! |
| 0            | T6 | B11 | 0 | 0 | kleiner LLOQ | #VALUE! | 1    | #VALUE! |
| 0            | T6 | B12 | 0 | 0 | kleiner LLOQ | #VALUE! | 1    | #VALUE! |
| 0            | T6 | C01 | 0 | 0 | kleiner LLOQ | #VALUE! | 1    | #VALUE! |

Plate: T6

|   | 1 | 2 | 3 | 4 | 5 | 6 | 7     | 8     | 9     | 10    | 11    | 12    |
|---|---|---|---|---|---|---|-------|-------|-------|-------|-------|-------|
| A |   |   |   |   |   |   |       |       |       |       |       |       |
| B |   |   |   |   |   |   |       |       |       |       |       |       |
| C |   |   |   |   |   |   |       |       |       |       |       |       |
| D |   |   |   |   |   |   | 1.027 | 1.026 |       |       |       |       |
| E |   |   |   |   |   |   |       |       |       |       |       |       |
| F |   |   |   |   |   |   |       |       |       |       |       |       |
| G |   |   |   |   |   |   | 0.051 | 0.050 | 0.050 | 0.052 | 0.051 | 0.051 |
| H |   |   |   |   |   |   | 0.050 | 0.050 | 0.050 | 0.050 | 0.049 | 0.049 |

Plattenbelegung

|   | 1 | 2 | 3 | 4 | 5      | 6      | 7      | 8      | 9      | 10     | 11     | 12     |
|---|---|---|---|---|--------|--------|--------|--------|--------|--------|--------|--------|
| A |   |   |   |   |        |        |        |        |        |        |        |        |
| B |   |   |   |   |        |        |        |        |        |        |        |        |
| C |   |   |   |   |        |        |        |        |        |        |        |        |
| D |   |   |   |   | T6SN1  | T6SN1  | T6SN2  | T6SN2  | T6SN3  | T6SN3  | T6SN4  | T6SN4  |
| E |   |   |   |   | T6SS11 | T6SS11 | T6SS12 | T6SS12 | T6SS13 | T6SS13 | T6SS14 | T6SS14 |



|        |    |     |   |   |              |         |   |         |
|--------|----|-----|---|---|--------------|---------|---|---------|
| 0      | T7 | A01 | 0 | 0 | kleiner LLOQ | #VALUE! | 1 | #VALUE! |
| 0      | T7 | A02 | 0 | 0 | kleiner LLOQ | #VALUE! | 1 | #VALUE! |
| 0      | T7 | A03 | 0 | 0 | kleiner LLOQ | #VALUE! | 1 | #VALUE! |
| 0      | T7 | A04 | 0 | 0 | kleiner LLOQ | #VALUE! | 1 | #VALUE! |
| 0      | T7 | A05 | 0 | 0 | kleiner LLOQ | #VALUE! | 1 | #VALUE! |
| 0      | T7 | A06 | 0 | 0 | kleiner LLOQ | #VALUE! | 1 | #VALUE! |
| 0      | T7 | A07 | 0 | 0 | kleiner LLOQ | #VALUE! | 1 | #VALUE! |
| 0      | T7 | A08 | 0 | 0 | kleiner LLOQ | #VALUE! | 1 | #VALUE! |
| 0      | T7 | A09 | 0 | 0 | kleiner LLOQ | #VALUE! | 1 | #VALUE! |
| 0      | T7 | A10 | 0 | 0 | kleiner LLOQ | #VALUE! | 1 | #VALUE! |
| 0      | T7 | A11 | 0 | 0 | kleiner LLOQ | #VALUE! | 1 | #VALUE! |
| 0      | T7 | A12 | 0 | 0 | kleiner LLOQ | #VALUE! | 1 | #VALUE! |
| 0      | T7 | B01 | 0 | 0 | kleiner LLOQ | #VALUE! | 1 | #VALUE! |
| 0      | T7 | B02 | 0 | 0 | kleiner LLOQ | #VALUE! | 1 | #VALUE! |
| 0      | T7 | B03 | 0 | 0 | kleiner LLOQ | #VALUE! | 1 | #VALUE! |
| 0      | T7 | B04 | 0 | 0 | kleiner LLOQ | #VALUE! | 1 | #VALUE! |
| 0      | T7 | B05 | 0 | 0 | kleiner LLOQ | #VALUE! | 1 | #VALUE! |
| 0      | T7 | B06 | 0 | 0 | kleiner LLOQ | #VALUE! | 1 | #VALUE! |
| 0      | T7 | B07 | 0 | 0 | kleiner LLOQ | #VALUE! | 1 | #VALUE! |
| 0      | T7 | B08 | 0 | 0 | kleiner LLOQ | #VALUE! | 1 | #VALUE! |
| 0      | T7 | B09 | 0 | 0 | kleiner LLOQ | #VALUE! | 1 | #VALUE! |
| 0      | T7 | B10 | 0 | 0 | kleiner LLOQ | #VALUE! | 1 | #VALUE! |
| 0      | T7 | B11 | 0 | 0 | kleiner LLOQ | #VALUE! | 1 | #VALUE! |
| 0      | T7 | B12 | 0 | 0 | kleiner LLOQ | #VALUE! | 1 | #VALUE! |
| 0      | T7 | C01 | 0 | 0 | kleiner LLOQ | #VALUE! | 1 | #VALUE! |
| 0      | T7 | C02 | 0 | 0 | kleiner LLOQ | #VALUE! | 1 | #VALUE! |
| 0      | T7 | C03 | 0 | 0 | kleiner LLOQ | #VALUE! | 1 | #VALUE! |
| 0      | T7 | C04 | 0 | 0 | kleiner LLOQ | #VALUE! | 1 | #VALUE! |
| 0      | T7 | C05 | 0 | 0 | kleiner LLOQ | #VALUE! | 1 | #VALUE! |
| 0      | T7 | C06 | 0 | 0 | kleiner LLOQ | #VALUE! | 1 | #VALUE! |
| 0      | T7 | C07 | 0 | 0 | kleiner LLOQ | #VALUE! | 1 | #VALUE! |
| 0      | T7 | C08 | 0 | 0 | kleiner LLOQ | #VALUE! | 1 | #VALUE! |
| 0      | T7 | C09 | 0 | 0 | kleiner LLOQ | #VALUE! | 1 | #VALUE! |
| 0      | T7 | C10 | 0 | 0 | kleiner LLOQ | #VALUE! | 1 | #VALUE! |
| 0      | T7 | C11 | 0 | 0 | kleiner LLOQ | #VALUE! | 1 | #VALUE! |
| 0      | T7 | C12 | 0 | 0 | kleiner LLOQ | #VALUE! | 1 | #VALUE! |
| 0      | T7 | D01 | 0 | 0 | kleiner LLOQ | #VALUE! | 1 | #VALUE! |
| 0      | T7 | D02 | 0 | 0 | kleiner LLOQ | #VALUE! | 1 | #VALUE! |
| 0      | T7 | D03 | 0 | 0 | kleiner LLOQ | #VALUE! | 1 | #VALUE! |
| 0      | T7 | D04 | 0 | 0 | kleiner LLOQ | #VALUE! | 1 | #VALUE! |
| 0      | T7 | D05 | 0 | 0 | kleiner LLOQ | #VALUE! | 1 | #VALUE! |
| 0      | T7 | D06 | 0 | 0 | kleiner LLOQ | #VALUE! | 1 | #VALUE! |
| T7SN2  | T7 | D07 | 0 | 0 | kleiner LLOQ | #VALUE! | 1 | #VALUE! |
| T7SN2  | T7 | D08 | 0 | 0 | kleiner LLOQ | #VALUE! | 1 | #VALUE! |
| T7SN3  | T7 | D09 | 0 | 0 | kleiner LLOQ | #VALUE! | 1 | #VALUE! |
| T7SN3  | T7 | D10 | 0 | 0 | kleiner LLOQ | #VALUE! | 1 | #VALUE! |
| T7SN4  | T7 | D11 | 0 | 0 | kleiner LLOQ | #VALUE! | 1 | #VALUE! |
| T7SN4  | T7 | D12 | 0 | 0 | kleiner LLOQ | #VALUE! | 1 | #VALUE! |
| 0      | T7 | E01 | 0 | 0 | kleiner LLOQ | #VALUE! | 1 | #VALUE! |
| 0      | T7 | E02 | 0 | 0 | kleiner LLOQ | #VALUE! | 1 | #VALUE! |
| 0      | T7 | E03 | 0 | 0 | kleiner LLOQ | #VALUE! | 1 | #VALUE! |
| 0      | T7 | E04 | 0 | 0 | kleiner LLOQ | #VALUE! | 1 | #VALUE! |
| T7SS11 | T7 | E05 | 0 | 0 | kleiner LLOQ | #VALUE! | 1 | #VALUE! |
| T7SS11 | T7 | E06 | 0 | 0 | kleiner LLOQ | #VALUE! | 1 | #VALUE! |
| T7SS12 | T7 | E07 | 0 | 0 | kleiner LLOQ | #VALUE! | 1 | #VALUE! |
| T7SS12 | T7 | E08 | 0 | 0 | kleiner LLOQ | #VALUE! | 1 | #VALUE! |
| T7SS13 | T7 | E09 | 0 | 0 | kleiner LLOQ | #VALUE! | 1 | #VALUE! |

Plate: T7

|   | 1 | 2 | 3 | 4 | 5 | 6 | 7 | 8     | 9     | 10    | 11    | 12    |       |
|---|---|---|---|---|---|---|---|-------|-------|-------|-------|-------|-------|
| A |   |   |   |   |   |   |   |       |       |       |       |       |       |
| B |   |   |   |   |   |   |   |       |       |       |       |       |       |
| C |   |   |   |   |   |   |   |       |       |       |       |       |       |
| D |   |   |   |   |   |   |   |       |       |       |       |       |       |
| E |   |   |   |   |   |   |   |       |       |       |       |       |       |
| F |   |   |   |   |   |   |   |       |       |       |       |       |       |
| G |   |   |   |   |   |   |   | 0.051 | 0.051 | 0.051 | 0.053 | 0.052 | 0.051 |
| H |   |   |   |   |   |   |   | 0.050 | 0.050 | 0.050 | 0.050 | 0.050 | 0.050 |

Plattenbelegung

|   | 1 | 2 | 3 | 4 | 5      | 6      | 7      | 8         | 9         | 10        | 11        | 12        |           |
|---|---|---|---|---|--------|--------|--------|-----------|-----------|-----------|-----------|-----------|-----------|
| A |   |   |   |   |        |        |        |           |           |           |           |           |           |
| B |   |   |   |   |        |        |        |           |           |           |           |           |           |
| C |   |   |   |   |        |        |        |           |           |           |           |           |           |
| D |   |   |   |   |        |        |        |           |           |           |           |           |           |
| E |   |   |   |   |        |        |        |           |           |           |           |           |           |
| F |   |   |   |   | T7SS11 | T7SS11 | T7SS12 | T7SS12    | T7SS13    | T7SS13    | T7SS14    | T7SS14    |           |
| G |   |   |   |   |        |        |        |           |           |           |           |           |           |
| H |   |   |   |   |        |        |        | Blank PEG | Blank PEG | Blank PEG | Blank PEG | Blank PEG | Blank PEG |

Comment:

alle Messwerte bei lin low

Date Operator

Date Control

|              |    |     |   |   |              |         |   |         |
|--------------|----|-----|---|---|--------------|---------|---|---------|
| T7SS13       | T7 | E10 | 0 | 0 | kleiner LLOQ | #VALUE! | 1 | #VALUE! |
| T7SS14       | T7 | E11 | 0 | 0 | kleiner LLOQ | #VALUE! | 1 | #VALUE! |
| T7SS14       | T7 | E12 | 0 | 0 | kleiner LLOQ | #VALUE! | 1 | #VALUE! |
| 0            | T7 | F01 | 0 | 0 | kleiner LLOQ | #VALUE! | 1 | #VALUE! |
| 0            | T7 | F02 | 0 | 0 | kleiner LLOQ | #VALUE! | 1 | #VALUE! |
| 0            | T7 | F03 | 0 | 0 | kleiner LLOQ | #VALUE! | 1 | #VALUE! |
| 0            | T7 | F04 | 0 | 0 | kleiner LLOQ | #VALUE! | 1 | #VALUE! |
| T7SS21       | T7 | F05 | 0 | 0 | kleiner LLOQ | #VALUE! | 1 | #VALUE! |
| T7SS21       | T7 | F06 | 0 | 0 | kleiner LLOQ | #VALUE! | 1 | #VALUE! |
| T7SS22       | T7 | F07 | 0 | 0 | kleiner LLOQ | #VALUE! | 1 | #VALUE! |
| T7SS22       | T7 | F08 | 0 | 0 | kleiner LLOQ | #VALUE! | 1 | #VALUE! |
| T7SS23       | T7 | F09 | 0 | 0 | kleiner LLOQ | #VALUE! | 1 | #VALUE! |
| T7SS23       | T7 | F10 | 0 | 0 | kleiner LLOQ | #VALUE! | 1 | #VALUE! |
| T7SS24       | T7 | F11 | 0 | 0 | kleiner LLOQ | #VALUE! | 1 | #VALUE! |
| T7SS24       | T7 | F12 | 0 | 0 | kleiner LLOQ | #VALUE! | 1 | #VALUE! |
| 0            | T7 | G01 | 0 | 0 | kleiner LLOQ | #VALUE! | 1 | #VALUE! |
| 0            | T7 | G02 | 0 | 0 | kleiner LLOQ | #VALUE! | 1 | #VALUE! |
| 0            | T7 | G03 | 0 | 0 | kleiner LLOQ | #VALUE! | 1 | #VALUE! |
| 0            | T7 | G04 | 0 | 0 | kleiner LLOQ | #VALUE! | 1 | #VALUE! |
| 0            | T7 | G05 | 0 | 0 | kleiner LLOQ | #VALUE! | 1 | #VALUE! |
| 0            | T7 | G06 | 0 | 0 | kleiner LLOQ | #VALUE! | 1 | #VALUE! |
| Blank PEG    | T7 | G07 | 0 | 0 | kleiner LLOQ | #VALUE! | 1 | #VALUE! |
| Blank PEG    | T7 | G08 | 0 | 0 | kleiner LLOQ | #VALUE! | 1 | #VALUE! |
| Blank PEG    | T7 | G09 | 0 | 0 | kleiner LLOQ | #VALUE! | 1 | #VALUE! |
| Blank PEG    | T7 | G10 | 0 | 0 | kleiner LLOQ | #VALUE! | 1 | #VALUE! |
| Blank PEG    | T7 | G11 | 0 | 0 | kleiner LLOQ | #VALUE! | 1 | #VALUE! |
| Blank PEG    | T7 | G12 | 0 | 0 | kleiner LLOQ | #VALUE! | 1 | #VALUE! |
| 0            | T7 | H01 | 0 | 0 | kleiner LLOQ | #VALUE! | 1 | #VALUE! |
| 0            | T7 | H02 | 0 | 0 | kleiner LLOQ | #VALUE! | 1 | #VALUE! |
| 0            | T7 | H03 | 0 | 0 | kleiner LLOQ | #VALUE! | 1 | #VALUE! |
| 0            | T7 | H04 | 0 | 0 | kleiner LLOQ | #VALUE! | 1 | #VALUE! |
| 0            | T7 | H05 | 0 | 0 | kleiner LLOQ | #VALUE! | 1 | #VALUE! |
| 0            | T7 | H06 | 0 | 0 | kleiner LLOQ | #VALUE! | 1 | #VALUE! |
| Blank no PEG | T7 | H07 | 0 | 0 | kleiner LLOQ | #VALUE! | 1 | #VALUE! |
| Blank no PEG | T7 | H08 | 0 | 0 | kleiner LLOQ | #VALUE! | 1 | #VALUE! |
| Blank no PEG | T7 | H09 | 0 | 0 | kleiner LLOQ | #VALUE! | 1 | #VALUE! |
| Blank no PEG | T7 | H10 | 0 | 0 | kleiner LLOQ | #VALUE! | 1 | #VALUE! |
| Blank no PEG | T7 | H11 | 0 | 0 | kleiner LLOQ | #VALUE! | 1 | #VALUE! |
| Blank no PEG | T7 | H12 | 0 | 0 | kleiner LLOQ | #VALUE! | 1 | #VALUE! |

|       |       |       |       |       |       |       |       |       |       |       |       |
|-------|-------|-------|-------|-------|-------|-------|-------|-------|-------|-------|-------|
| 1.447 | 1.739 |       | 1.170 |       |       |       |       |       | 0.667 | 0.440 | 0.043 |
| 1.447 | 1.332 |       | 1.392 | 0.137 | 0.146 | 0.130 | 0.138 | 0.109 | 0.729 | 0.478 | 0.042 |
| 1.391 | 1.281 |       | 1.311 | 0.204 | 0.184 | 0.184 | 0.198 | 0.201 | 0.743 | 0.474 | 0.043 |
| 0.961 | 0.835 |       | 1.405 | 0.336 | 0.347 | 0.375 | 0.387 | 0.300 | 0.824 | 0.483 | 0.044 |
| 0.445 | 0.441 |       | 1.280 | 1.085 | 1.086 | 1.218 | 1.004 | 0.873 | 0.704 | 0.457 | 0.041 |
| 0.355 | 0.315 |       | 1.332 | 1.768 | 1.925 | 1.753 | 1.739 | 1.606 |       |       | 0.036 |
| 0.223 | 0.188 | 1.666 | 1.499 | 1.632 |       | 0.048 | 0.046 | 0.047 | 0.048 | 0.048 | 0.048 |
| 0.118 | 0.106 | 1.556 | 1.622 | 1.573 |       | 0.047 | 0.054 | 0.051 | 0.051 | 0.052 | 0.051 |

1

|       |       |       |       |       |       |       |       |       |       |       |       |
|-------|-------|-------|-------|-------|-------|-------|-------|-------|-------|-------|-------|
| 1.652 | 1.627 |       | 1.188 | 0.748 | 0.811 | 0.764 | 0.753 | 0.674 | 0.751 | 0.529 | 0.044 |
| 1.443 | 1.372 |       | 1.364 | 0.139 | 0.147 | 0.131 | 0.139 | 0.110 | 0.811 | 0.561 | 0.043 |
| 1.377 | 1.281 |       | 1.284 | 0.206 | 0.189 | 0.184 | 0.200 | 0.202 | 0.821 | 0.560 | 0.044 |
| 0.972 | 0.883 |       | 1.387 | 0.339 | 0.349 | 0.386 | 0.406 | 0.312 | 0.903 | 0.565 | 0.044 |
| 0.484 | 0.474 |       | 1.298 | 1.087 | 1.113 | 1.203 | 1.022 | 0.903 | 0.790 | 0.544 | 0.042 |
| 0.359 | 0.326 |       | 1.308 | 1.622 | 1.622 | 1.630 | 1.625 | 1.550 |       |       | 0.037 |
| 0.228 | 0.199 | 1.527 | 1.373 | 1.462 |       | 0.048 | 0.046 | 0.048 | 0.049 | 0.049 | 0.049 |
| 0.125 | 0.109 | 1.473 | 1.410 | 1.371 |       | 0.048 | 0.054 | 0.052 | 0.052 | 0.052 | 0.051 |

2

|       |       |       |       |       |       |       |       |       |       |       |       |
|-------|-------|-------|-------|-------|-------|-------|-------|-------|-------|-------|-------|
| 1.579 | 1.475 |       | 1.150 | 1.210 | 1.303 | 1.202 | 1.219 | 1.125 | 0.759 | 0.549 | 0.043 |
| 1.357 | 1.303 |       | 1.283 | 0.140 | 0.148 | 0.131 | 0.139 | 0.111 | 0.820 | 0.575 | 0.043 |
| 1.323 | 1.228 |       | 1.227 | 0.206 | 0.188 | 0.184 | 0.198 | 0.201 | 0.824 | 0.579 | 0.043 |
| 0.959 | 0.872 |       | 1.321 | 0.339 | 0.348 | 0.387 | 0.406 | 0.314 | 0.909 | 0.580 | 0.044 |
| 0.483 | 0.473 |       | 1.270 | 1.069 | 1.103 | 1.181 | 1.017 | 0.903 | 0.798 | 0.560 | 0.042 |
| 0.360 | 0.326 |       | 1.270 | 1.497 | 1.448 | 1.496 | 1.494 | 1.449 |       |       | 0.037 |
| 0.228 | 0.199 | 1.374 | 1.262 | 1.314 |       | 0.048 | 0.046 | 0.048 | 0.049 | 0.049 | 0.049 |
| 0.125 | 0.110 | 1.346 | 1.262 | 1.253 |       | 0.048 | 0.054 | 0.052 | 0.052 | 0.052 | 0.051 |

3

|       |       |  |  |       |       |       |       |       |       |       |       |
|-------|-------|--|--|-------|-------|-------|-------|-------|-------|-------|-------|
| 1.511 | 1.369 |  |  | 1.538 | 1.712 | 1.528 | 1.502 | 1.425 |       |       | 0.043 |
| 1.296 | 1.261 |  |  |       |       |       |       |       |       |       | 0.043 |
| 1.272 | 1.193 |  |  |       |       |       |       |       |       |       | 0.043 |
| 0.947 | 0.859 |  |  |       |       |       |       |       |       |       | 0.044 |
| 0.481 | 0.471 |  |  |       |       |       |       |       |       |       | 0.042 |
| 0.361 | 0.325 |  |  |       |       |       |       |       |       |       | 0.037 |
| 0.229 | 0.199 |  |  |       |       | 0.048 | 0.046 | 0.048 | 0.049 | 0.049 | 0.049 |
| 0.125 | 0.110 |  |  |       |       | 0.047 | 0.054 | 0.052 | 0.052 | 0.052 | 0.051 |

4

|       |       |       |       |       |       |       |       |       |       |       |       |
|-------|-------|-------|-------|-------|-------|-------|-------|-------|-------|-------|-------|
| 1.493 | 1.317 | 1.678 | 1.110 | 1.621 | 1.807 | 1.618 | 1.584 | 1.508 | 0.765 | 0.597 | 0.043 |
| 1.259 | 1.238 | 1.850 | 1.197 | 0.139 | 0.150 | 0.132 | 0.139 | 0.111 | 0.821 | 0.588 | 0.043 |
| 1.248 | 1.175 | 1.816 | 1.153 | 0.204 | 0.188 | 0.184 | 0.197 | 0.199 | 0.831 | 0.599 | 0.044 |
| 0.943 | 0.859 | 1.970 | 1.231 | 0.338 | 0.357 | 0.386 | 0.406 | 0.316 | 0.916 | 0.595 | 0.044 |
| 0.480 | 0.470 | 2.220 | 1.220 | 1.054 | 1.088 | 1.154 | 1.006 | 0.902 | 0.805 | 0.579 | 0.042 |
| 0.359 | 0.325 | 2.149 | 1.211 | 1.395 | 1.324 | 1.348 | 1.345 | 1.317 | 0.037 | 0.037 | 0.037 |
| 0.228 | 0.199 | 1.240 | 1.151 | 1.183 | 0.034 | 0.049 | 0.046 | 0.048 | 0.049 | 0.049 | 0.049 |
| 0.125 | 0.110 | 1.223 | 1.132 | 1.146 | 0.038 | 0.048 | 0.054 | 0.052 | 0.052 | 0.052 | 0.051 |

5

|       |       |  |       |       |       |       |       |       |       |       |       |
|-------|-------|--|-------|-------|-------|-------|-------|-------|-------|-------|-------|
| 1.434 | 1.258 |  | 1.090 | 1.648 | 1.876 | 1.649 | 1.627 | 1.535 |       |       |       |
| 1.217 | 1.201 |  | 1.149 |       |       |       |       |       |       |       |       |
| 1.205 | 1.143 |  | 1.109 |       |       |       |       |       |       |       |       |
| 0.935 | 0.845 |  | 1.182 |       |       |       |       |       |       |       |       |
| 0.477 | 0.469 |  | 1.181 |       |       |       |       |       |       |       |       |
| 0.360 | 0.323 |  | 1.167 |       |       |       |       |       |       |       |       |
| 0.229 | 0.200 |  |       |       |       | 0.049 | 0.047 | 0.048 | 0.049 | 0.049 | 0.049 |
| 0.125 | 0.110 |  |       |       |       | 0.048 | 0.054 | 0.052 | 0.052 | 0.052 | 0.051 |

6

|       |       |       |       |       |       |       |       |       |       |       |       |
|-------|-------|-------|-------|-------|-------|-------|-------|-------|-------|-------|-------|
| 1.013 | 0.810 |       | 0.668 | 0.808 | 0.940 | 0.720 | 0.798 | 0.687 | 0.904 | 0.845 | 0.043 |
| 0.709 | 0.827 |       | 0.703 | 0.142 | 0.156 | 0.136 | 0.137 | 0.116 | 0.990 | 0.846 | 0.042 |
| 0.682 | 0.692 |       | 0.680 | 0.197 | 0.188 | 0.190 | 0.191 | 0.184 | 1.023 | 0.861 | 0.043 |
| 0.507 | 0.519 |       | 0.740 | 0.316 | 0.264 | 0.364 | 0.377 | 0.312 | 1.111 | 0.870 | 0.043 |
| 0.394 | 0.406 |       | 0.682 | 0.580 | 0.561 | 0.600 | 0.529 | 0.563 | 0.962 | 0.834 | 0.042 |
| 0.333 | 0.322 |       | 0.661 | 0.995 | 0.930 | 0.848 | 0.832 | 0.797 | 0.037 | 0.037 | 0.037 |
| 0.229 | 0.201 | 0.843 | 0.679 | 0.732 |       | 0.048 | 0.046 | 0.047 |       |       | 0.047 |
| 0.124 | 0.111 | 0.773 | 0.682 | 0.701 |       | 0.047 | 0.053 | 0.051 | 0.051 | 0.052 | 0.051 |

7

skin cultivation





|            |       |       |       |  |  |       |       |       |       |       |       |              |
|------------|-------|-------|-------|--|--|-------|-------|-------|-------|-------|-------|--------------|
| 2.565      | 2.187 | 2.054 | 0.598 |  |  |       |       |       |       |       |       | T6 1 hum sui |
| 0.238      | 0.241 | 0.246 | 0.191 |  |  |       |       |       |       |       |       |              |
| 0.974      | 1.028 | 0.879 | 0.207 |  |  |       |       |       |       |       |       |              |
| 0.82984877 | 0.556 | 0.366 |       |  |  |       |       |       |       |       |       |              |
| 0.311      | 0.314 | 0.220 | 0.248 |  |  |       |       |       |       |       |       |              |
| 0.234      | 0.277 | 0.377 | 0.512 |  |  |       |       |       |       |       |       |              |
|            |       |       |       |  |  | 0.050 | 0.049 | 0.050 | 0.051 | 0.050 | 0.050 |              |
|            |       |       |       |  |  | 0.050 | 0.049 | 0.050 | 0.049 | 0.049 | 0.049 |              |

|  |  |  |  |       |       |       |           |       |       |       |       |              |
|--|--|--|--|-------|-------|-------|-----------|-------|-------|-------|-------|--------------|
|  |  |  |  | 0.873 | 0.588 | 0.744 | 0.778     | 0.518 | 0.513 | 0.634 | 0.620 | T6 2 hum sui |
|  |  |  |  | 0.274 | 0.273 | 0.262 | 0.271     | 0.261 | 0.272 | 0.190 | 0.194 |              |
|  |  |  |  | 1.181 | 1.211 | 1.314 | 1.355     | 1.060 | 1.076 | 0.232 | 0.227 |              |
|  |  |  |  |       |       | 1.027 | 1.0255289 | 0.607 | 0.625 | 0.409 | 0.413 |              |
|  |  |  |  | 0.341 | 0.356 | 0.341 | 0.349     | 0.231 | 0.239 | 0.257 | 0.254 |              |
|  |  |  |  | 0.251 | 0.260 | 0.283 | 0.286     | 0.421 | 0.436 | 0.559 | 0.563 |              |
|  |  |  |  |       |       | 0.051 | 0.050     | 0.050 | 0.052 | 0.051 | 0.051 |              |
|  |  |  |  |       |       | 0.050 | 0.050     | 0.050 | 0.050 | 0.049 | 0.049 |              |

|                    |              |                              |                            |                              |                              |
|--------------------|--------------|------------------------------|----------------------------|------------------------------|------------------------------|
| Project number     | F-120        | Apparatus                    | Wallac Victor              | Operator                     | IsBa                         |
| GLP Study (Number) | n.a.         | Protocol (instrument method) | LDH test 2016              | Date of preparation          | 19-04-18                     |
| hot substance      | isotope      | File name (results)          | IsBa_180419/20_LDH_full_v2 | Date of measurement          | 19-04-18                     |
|                    | name         | Kind of well plate           | 96 well                    | shaking time [min]           | 30                           |
| cold substance     | ACB-ID       | sample volume [µL]           | 100                        | stirring rate (Target) [rpm] | 150                          |
|                    | Batch number | Cocktail volume [µL]         | 175                        | Kind of measurement          | UV-vis                       |
|                    | name         | ACB-ID of cocktail           |                            | Wave length [nm]             | 450                          |
|                    | ACB-ID       | Matrix                       | DMEM (from powder)+PEG     | Remarks                      | Cocktail 100µl RM, 75µl STOP |
|                    | Batch number | Blank description            | DMEM/PEG, H2O              | Remarks                      | 7 standards split low/high   |
| n.a.               | n.a.         | Pipettes (No. / volume)      | 50-200µl                   | Remarks                      | KLP4 common for both         |
| n.a.               | n.a.         | Pipettes (No. / volume)      | n.a.                       | Remarks                      | n.a.                         |

Messdaten (diese Tabelle in Bericht übernehmen)

| Sample name * | concentration (theor.) * | measured data | measured data | mean measured | SD    | RSD   | Blank * | measured data after * Blank subtraction | concentration (calc.) * | Deviation * | Residuen |
|---------------|--------------------------|---------------|---------------|---------------|-------|-------|---------|-----------------------------------------|-------------------------|-------------|----------|
|               | [µg/mL]                  | [AU]          | [AU]          | [AU]          | [AU]  | [%]   | [AU]    |                                         | [µg/mL]                 | [%]         |          |
| KLP1          |                          |               |               |               |       |       | 0.047   |                                         |                         |             |          |
| KLP2          |                          |               |               |               |       |       | 0.054   |                                         |                         |             |          |
| KLP3          |                          |               |               |               |       |       | 0.051   |                                         |                         |             |          |
| KLP4          | 0.041                    | 0.959         | 0.972         | 0.883         | 0.938 | 0.04  | 4.19    | 0.051                                   | 0.887                   | 0.041       | -0.57    |
| KLP5          | 0.018                    | 0.483         | 0.484         | 0.474         | 0.480 | 0.00  | 0.98    | 0.052                                   | 0.429                   | 0.019       | 2.42     |
| KLP6          | 0.012                    | 0.360         | 0.359         | 0.326         | 0.348 | 0.02  | 4.54    | 0.051                                   | 0.297                   | 0.013       | 5.00     |
| KLP7          | 0.007                    | 0.228         | 0.228         | 0.199         | 0.218 | 0.014 | 6.35    |                                         | 0.168                   | 0.006       | -11.29   |
| KLP8          |                          |               |               |               |       |       |         |                                         |                         |             |          |

Statistical data

|                                              |                                          |                     |              |
|----------------------------------------------|------------------------------------------|---------------------|--------------|
| Geradensteigung                              | Slope                                    | m                   | 21.03        |
| Y-Achsenabschnitt                            | Y-Intercept                              | b                   | 0.03         |
| Standardabw. Geradensteigung                 | SD-Slope                                 | S <sub>m</sub>      | 0.648055501  |
| Standardabw. Achsenabschnittes               | SD-Y-Intercept                           | S <sub>b</sub>      | 0.015177452  |
| Anzahl Messpunkte                            | number of measuring points               | n                   | 4            |
| Quadratsumme                                 | sum of squares                           | Q <sub>xx</sub>     | 0.000664046  |
| Bereichsmittle                               |                                          |                     | 0.019557193  |
| Freiheitsgrade                               | degree of freedom                        | f                   | 2            |
| Student-t-Faktor für (P = 95 %; f = n-2)     | Student-t-factor for (P = 95 %; f = n-2) | t                   | 4.303        |
| Vertrauensbereich Steig. (95 %) Obergrenze   |                                          | m + VB <sub>m</sub> | 23.81763508  |
| Vertrauensbereich Steig. (95 %) Untergrenze  |                                          | m - VB <sub>m</sub> | 18.24046944  |
| Vertrauensbereich Achsenabschnitt (95 %) Og. |                                          | b + VB <sub>b</sub> | 0.099335829  |
| Vertrauensbereich Achsenabschnitt (95 %) Ug. |                                          | b - VB <sub>b</sub> | -0.031281327 |
| Korrelationskoeffizient                      | correlation coefficient                  | r                   | 0.9991       |
| Bestimmtheitsmaß                             | determination coefficient                | r <sup>2</sup>      | 0.9981       |
| Reststandardabweichung                       |                                          | S <sub>0</sub>      | 0.01669983   |
| Summe Restquadrate                           |                                          | sd                  | 0.657385838  |
| Verfahrensstandardabw.                       |                                          | S <sub>00</sub>     | 0.000794131  |
| Rel. Verfahrensstandardabw. %                |                                          | V <sub>00</sub>     | 4.060559029  |

Berichten

|                          |       |
|--------------------------|-------|
| mean Blank               | 0     |
| SD Blank                 | 0.00  |
| RSD Blank                | 3.79  |
| x <sup>2</sup> SD (LLOQ) | 0.01  |
| x <sup>2</sup> SD (LOD)  | 0.01  |
| LLOQ (AU)                | 0.061 |
| LOD (AU)                 | 0.067 |
| ULOQ                     | 0.887 |
| LLOQ (Lin)               | 0.168 |

Evaluation / Comment

LDH linearity valid with 7 standards, split in lin high and lin low, each with 4 standards and KLP4 common standard for both. R<sup>2</sup> 0,9981, deviations for both between -13.34% and +13.04%

Date Operator Date Operator Control

Figure 1 Linearity



Figure 2 Method validation Residuen Plot



Evaluation / Comment

lin passed

Date

Operator

Date

Control

| Sample name | Plate | Position | [AU]  | [AU]-Blank | Rating       | [µg/mL] | Dilution factor | [µg/mL] |
|-------------|-------|----------|-------|------------|--------------|---------|-----------------|---------|
| 0           | T8    | A01      | 0     | 0          | kleiner LLOQ | #VALUE! | 1               | #VALUE! |
| 0           | T8    | A02      | 0     | 0          | kleiner LLOQ | #VALUE! | 1               | #VALUE! |
| 0           | T8    | A03      | 0     | 0          | kleiner LLOQ | #VALUE! | 1               | #VALUE! |
| 0           | T8    | A04      | 0     | 0          | kleiner LLOQ | #VALUE! | 1               | #VALUE! |
| 0           | T8    | A05      | 0     | 0          | kleiner LLOQ | #VALUE! | 1               | #VALUE! |
| 0           | T8    | A06      | 0     | 0          | kleiner LLOQ | #VALUE! | 1               | #VALUE! |
| 0           | T8    | A07      | 0     | 0          | kleiner LLOQ | #VALUE! | 1               | #VALUE! |
| 0           | T8    | A08      | 0     | 0          | kleiner LLOQ | #VALUE! | 1               | #VALUE! |
| 0           | T8    | A09      | 0     | 0          | kleiner LLOQ | #VALUE! | 1               | #VALUE! |
| 0           | T8    | A10      | 0     | 0          | kleiner LLOQ | #VALUE! | 1               | #VALUE! |
| 0           | T8    | A11      | 0     | 0          | kleiner LLOQ | #VALUE! | 1               | #VALUE! |
| 0           | T8    | A12      | 0     | 0          | kleiner LLOQ | #VALUE! | 1               | #VALUE! |
| 0           | T8    | B01      | 0     | 0          | kleiner LLOQ | #VALUE! | 1               | #VALUE! |
| 0           | T8    | B02      | 0     | 0          | kleiner LLOQ | #VALUE! | 1               | #VALUE! |
| 0           | T8    | B03      | 0     | 0          | kleiner LLOQ | #VALUE! | 1               | #VALUE! |
| 0           | T8    | B04      | 0     | 0          | kleiner LLOQ | #VALUE! | 1               | #VALUE! |
| 0           | T8    | B05      | 0     | 0          | kleiner LLOQ | #VALUE! | 1               | #VALUE! |
| 0           | T8    | B06      | 0     | 0          | kleiner LLOQ | #VALUE! | 1               | #VALUE! |
| 0           | T8    | B07      | 0     | 0          | kleiner LLOQ | #VALUE! | 1               | #VALUE! |
| 0           | T8    | B08      | 0     | 0          | kleiner LLOQ | #VALUE! | 1               | #VALUE! |
| 0           | T8    | B09      | 0     | 0          | kleiner LLOQ | #VALUE! | 1               | #VALUE! |
| 0           | T8    | B10      | 0     | 0          | kleiner LLOQ | #VALUE! | 1               | #VALUE! |
| 0           | T8    | B11      | 0     | 0          | kleiner LLOQ | #VALUE! | 1               | #VALUE! |
| 0           | T8    | B12      | 0     | 0          | kleiner LLOQ | #VALUE! | 1               | #VALUE! |
| 0           | T8    | C01      | 0     | 0          | kleiner LLOQ | #VALUE! | 1               | #VALUE! |
| 0           | T8    | C02      | 0     | 0          | kleiner LLOQ | #VALUE! | 1               | #VALUE! |
| 0           | T8    | C03      | 0     | 0          | kleiner LLOQ | #VALUE! | 1               | #VALUE! |
| 0           | T8    | C04      | 0     | 0          | kleiner LLOQ | #VALUE! | 1               | #VALUE! |
| 0           | T8    | C05      | 0     | 0          | kleiner LLOQ | #VALUE! | 1               | #VALUE! |
| 0           | T8    | C06      | 0     | 0          | kleiner LLOQ | #VALUE! | 1               | #VALUE! |
| 0           | T8    | C07      | 0     | 0          | kleiner LLOQ | #VALUE! | 1               | #VALUE! |
| 0           | T8    | C08      | 0     | 0          | kleiner LLOQ | #VALUE! | 1               | #VALUE! |
| 0           | T8    | C09      | 0     | 0          | kleiner LLOQ | #VALUE! | 1               | #VALUE! |
| 0           | T8    | C10      | 0     | 0          | kleiner LLOQ | #VALUE! | 1               | #VALUE! |
| 0           | T8    | C11      | 0     | 0          | kleiner LLOQ | #VALUE! | 1               | #VALUE! |
| 0           | T8    | C12      | 0     | 0          | kleiner LLOQ | #VALUE! | 1               | #VALUE! |
| 0           | T8    | D01      | 0     | 0          | kleiner LLOQ | #VALUE! | 1               | #VALUE! |
| 0           | T8    | D02      | 0     | 0          | kleiner LLOQ | #VALUE! | 1               | #VALUE! |
| 0           | T8    | D03      | 0     | 0          | kleiner LLOQ | #VALUE! | 1               | #VALUE! |
| 0           | T8    | D04      | 0     | 0          | kleiner LLOQ | #VALUE! | 1               | #VALUE! |
| T8SN1       | T8    | D05      | 0.000 | -0.051     | kleiner LLOQ | #VALUE! | 2.75            | #VALUE! |
| T8SN1       | T8    | D06      | 0.000 | -0.051     | kleiner LLOQ | #VALUE! | 2.75            | #VALUE! |
| T8SN2       | T8    | D07      | 0.262 | 0.211      | 0.211        | 0.008   | 2.75            | 0.023   |
| T8SN2       | T8    | D08      | 0.241 | 0.190      | 0.190        | 0.007   | 2.75            | 0.020   |
| T8SN3       | T8    | D09      | 0.621 | 0.570      | 0.570        | 0.025   | 2.75            | 0.070   |
| T8SN3       | T8    | D10      | 0.621 | 0.570      | 0.570        | 0.026   | 2.75            | 0.070   |
| T8SN4       | T8    | D11      | 0.449 | 0.398      | 0.398        | 0.017   | 2.75            | 0.048   |
| T8SN4       | T8    | D12      | 0.458 | 0.407      | 0.407        | 0.018   | 2.75            | 0.049   |

Plate: T8

| Test | Test | Test | Test | Test | Test  | Test  | Test  | Test  | Test  | Test  | Test  | Test  |
|------|------|------|------|------|-------|-------|-------|-------|-------|-------|-------|-------|
| 1    | 2    | 3    | 4    | 5    | 6     | 7     | 8     | 9     | 10    | 11    | 12    |       |
| A    |      |      |      |      |       |       |       |       |       |       |       |       |
| B    |      |      |      |      |       |       |       |       |       |       |       |       |
| C    |      |      |      |      |       |       |       |       |       |       |       |       |
| D    |      |      |      |      |       |       |       |       |       |       |       |       |
| E    |      |      |      |      | 0.260 | 0.234 | 0.197 | 0.193 | 0.128 | 0.132 | 0.204 | 0.210 |
| F    |      |      |      |      | 0.245 | 0.247 | 0.151 | 0.146 | 0.271 | 0.265 | 0.268 | 0.253 |
| G    |      |      |      |      |       |       |       | 0.053 | 0.055 | 0.053 | 0.054 | 0.053 |
| H    |      |      |      |      |       |       |       | 0.053 | 0.052 | 0.051 | 0.052 | 0.052 |

Plattenbelegung

|   | 1 | 2 | 3 | 4 | 5      | 6      | 7            | 8            | 9            | 10           | 11           | 12           |
|---|---|---|---|---|--------|--------|--------------|--------------|--------------|--------------|--------------|--------------|
| A |   |   |   |   |        |        |              |              |              |              |              |              |
| B |   |   |   |   |        |        |              |              |              |              |              |              |
| C |   |   |   |   |        |        |              |              |              |              |              |              |
| D |   |   |   |   | T8SN1  | T8SN1  | T8SN2        | T8SN2        | T8SN3        | T8SN3        | T8SN4        | T8SN4        |
| E |   |   |   |   | T8SS11 | T8SS11 | T8SS12       | T8SS12       | T8SS13       | T8SS13       | T8SS14       | T8SS14       |
| F |   |   |   |   | T8SS21 | T8SS21 | T8SS22       | T8SS22       | T8SS23       | T8SS23       | T8SS24       | T8SS24       |
| G |   |   |   |   |        |        | Blank PEG    | Blank PEG    | Blank PEG    | Blank PEG    | Blank PEG    | Blank PEG    |
| H |   |   |   |   |        |        | Blank no PEG | Blank no PEG | Blank no PEG | Blank no PEG | Blank no PEG | Blank no PEG |

Samples aufgeteilt in lin high und low;höher konzentrierte Samples bei lin high zu finden.

Comment:

Date Operator Date Control

|              |    |     |       |       |              |         |      |         |
|--------------|----|-----|-------|-------|--------------|---------|------|---------|
| 0            | T8 | E01 | 0     | 0     | kleiner LLOQ | #VALUE! | 1    | #VALUE! |
| 0            | T8 | E02 | 0     | 0     | kleiner LLOQ | #VALUE! | 1    | #VALUE! |
| 0            | T8 | E03 | 0     | 0     | kleiner LLOQ | #VALUE! | 1    | #VALUE! |
| 0            | T8 | E04 | 0     | 0     | kleiner LLOQ | #VALUE! | 1    | #VALUE! |
| T8SS11       | T8 | E05 | 0.260 | 0.209 | 0.209        | 0.008   | 2.75 | 0.023   |
| T8SS11       | T8 | E06 | 0.234 | 0.183 | 0.183        | 0.007   | 2.75 | 0.019   |
| T8SS12       | T8 | E07 | 0.197 | 0.146 | kleiner LLOQ | #VALUE! | 2.75 | #VALUE! |
| T8SS12       | T8 | E08 | 0.193 | 0.142 | kleiner LLOQ | #VALUE! | 2.75 | #VALUE! |
| T8SS13       | T8 | E09 | 0.128 | 0.078 | kleiner LLOQ | #VALUE! | 2.75 | #VALUE! |
| T8SS13       | T8 | E10 | 0.132 | 0.081 | kleiner LLOQ | #VALUE! | 2.75 | #VALUE! |
| T8SS14       | T8 | E11 | 0.204 | 0.153 | kleiner LLOQ | #VALUE! | 2.75 | #VALUE! |
| T8SS14       | T8 | E12 | 0.210 | 0.159 | kleiner LLOQ | #VALUE! | 2.75 | #VALUE! |
| 0            | T8 | F01 | 0     | 0     | kleiner LLOQ | #VALUE! | 1    | #VALUE! |
| 0            | T8 | F02 | 0     | 0     | kleiner LLOQ | #VALUE! | 1    | #VALUE! |
| 0            | T8 | F03 | 0     | 0     | kleiner LLOQ | #VALUE! | 1    | #VALUE! |
| 0            | T8 | F04 | 0     | 0     | kleiner LLOQ | #VALUE! | 1    | #VALUE! |
| T8SS21       | T8 | F05 | 0.245 | 0.194 | 0.194        | 0.008   | 2.75 | 0.021   |
| T8SS21       | T8 | F06 | 0.247 | 0.196 | 0.196        | 0.008   | 2.75 | 0.021   |
| T8SS22       | T8 | F07 | 0.151 | 0.100 | kleiner LLOQ | #VALUE! | 2.75 | #VALUE! |
| T8SS22       | T8 | F08 | 0.146 | 0.095 | kleiner LLOQ | #VALUE! | 2.75 | #VALUE! |
| T8SS23       | T8 | F09 | 0.271 | 0.220 | 0.220        | 0.009   | 2.75 | 0.024   |
| T8SS23       | T8 | F10 | 0.265 | 0.214 | 0.214        | 0.009   | 2.75 | 0.023   |
| T8SS24       | T8 | F11 | 0.268 | 0.217 | 0.217        | 0.009   | 2.75 | 0.024   |
| T8SS24       | T8 | F12 | 0.253 | 0.202 | 0.202        | 0.008   | 2.75 | 0.022   |
| 0            | T8 | G01 | 0     | 0     | kleiner LLOQ | #VALUE! | 1    | #VALUE! |
| 0            | T8 | G02 | 0     | 0     | kleiner LLOQ | #VALUE! | 1    | #VALUE! |
| 0            | T8 | G03 | 0     | 0     | kleiner LLOQ | #VALUE! | 1    | #VALUE! |
| 0            | T8 | G04 | 0     | 0     | kleiner LLOQ | #VALUE! | 1    | #VALUE! |
| 0            | T8 | G05 | 0     | 0     | kleiner LLOQ | #VALUE! | 1    | #VALUE! |
| 0            | T8 | G06 | 0     | 0     | kleiner LLOQ | #VALUE! | 1    | #VALUE! |
| Blank PEG    | T8 | G07 | 0     | 0     | kleiner LLOQ | #VALUE! | 2.75 | #VALUE! |
| Blank PEG    | T8 | G08 | 0     | 0     | kleiner LLOQ | #VALUE! | 2.75 | #VALUE! |
| Blank PEG    | T8 | G09 | 0     | 0     | kleiner LLOQ | #VALUE! | 2.75 | #VALUE! |
| Blank PEG    | T8 | G10 | 0     | 0     | kleiner LLOQ | #VALUE! | 2.75 | #VALUE! |
| Blank PEG    | T8 | G11 | 0     | 0     | kleiner LLOQ | #VALUE! | 2.75 | #VALUE! |
| Blank PEG    | T8 | G12 | 0     | 0     | kleiner LLOQ | #VALUE! | 2.75 | #VALUE! |
| 0            | T8 | H01 | 0     | 0     | kleiner LLOQ | #VALUE! | 1    | #VALUE! |
| 0            | T8 | H02 | 0     | 0     | kleiner LLOQ | #VALUE! | 1    | #VALUE! |
| 0            | T8 | H03 | 0     | 0     | kleiner LLOQ | #VALUE! | 1    | #VALUE! |
| 0            | T8 | H04 | 0     | 0     | kleiner LLOQ | #VALUE! | 1    | #VALUE! |
| 0            | T8 | H05 | 0     | 0     | kleiner LLOQ | #VALUE! | 1    | #VALUE! |
| 0            | T8 | H06 | 0     | 0     | kleiner LLOQ | #VALUE! | 1    | #VALUE! |
| Blank no PEG | T8 | H07 | 0     | 0     | kleiner LLOQ | #VALUE! | 2.75 | #VALUE! |
| Blank no PEG | T8 | H08 | 0     | 0     | kleiner LLOQ | #VALUE! | 2.75 | #VALUE! |
| Blank no PEG | T8 | H09 | 0     | 0     | kleiner LLOQ | #VALUE! | 2.75 | #VALUE! |
| Blank no PEG | T8 | H10 | 0     | 0     | kleiner LLOQ | #VALUE! | 2.75 | #VALUE! |
| Blank no PEG | T8 | H11 | 0     | 0     | kleiner LLOQ | #VALUE! | 2.75 | #VALUE! |
| Blank no PEG | T8 | H12 | 0     | 0     | kleiner LLOQ | #VALUE! | 2.75 | #VALUE! |

|       |    |     |       |       |              |         |      |         |
|-------|----|-----|-------|-------|--------------|---------|------|---------|
| 0     | T9 | A01 | 0     | 0     | kleiner LLOQ | #VALUE! | 1    | #VALUE! |
| 0     | T9 | A02 | 0     | 0     | kleiner LLOQ | #VALUE! | 1    | #VALUE! |
| 0     | T9 | A03 | 0     | 0     | kleiner LLOQ | #VALUE! | 1    | #VALUE! |
| 0     | T9 | A04 | 0     | 0     | kleiner LLOQ | #VALUE! | 1    | #VALUE! |
| 0     | T9 | A05 | 0     | 0     | kleiner LLOQ | #VALUE! | 1    | #VALUE! |
| 0     | T9 | A06 | 0     | 0     | kleiner LLOQ | #VALUE! | 1    | #VALUE! |
| 0     | T9 | A07 | 0     | 0     | kleiner LLOQ | #VALUE! | 1    | #VALUE! |
| 0     | T9 | A08 | 0     | 0     | kleiner LLOQ | #VALUE! | 1    | #VALUE! |
| 0     | T9 | A09 | 0     | 0     | kleiner LLOQ | #VALUE! | 1    | #VALUE! |
| 0     | T9 | A10 | 0     | 0     | kleiner LLOQ | #VALUE! | 1    | #VALUE! |
| 0     | T9 | A11 | 0     | 0     | kleiner LLOQ | #VALUE! | 1    | #VALUE! |
| 0     | T9 | A12 | 0     | 0     | kleiner LLOQ | #VALUE! | 1    | #VALUE! |
| 0     | T9 | B01 | 0     | 0     | kleiner LLOQ | #VALUE! | 1    | #VALUE! |
| 0     | T9 | B02 | 0     | 0     | kleiner LLOQ | #VALUE! | 1    | #VALUE! |
| 0     | T9 | B03 | 0     | 0     | kleiner LLOQ | #VALUE! | 1    | #VALUE! |
| 0     | T9 | B04 | 0     | 0     | kleiner LLOQ | #VALUE! | 1    | #VALUE! |
| 0     | T9 | B05 | 0     | 0     | kleiner LLOQ | #VALUE! | 1    | #VALUE! |
| 0     | T9 | B06 | 0     | 0     | kleiner LLOQ | #VALUE! | 1    | #VALUE! |
| 0     | T9 | B07 | 0     | 0     | kleiner LLOQ | #VALUE! | 1    | #VALUE! |
| 0     | T9 | B08 | 0     | 0     | kleiner LLOQ | #VALUE! | 1    | #VALUE! |
| 0     | T9 | B09 | 0     | 0     | kleiner LLOQ | #VALUE! | 1    | #VALUE! |
| 0     | T9 | B10 | 0     | 0     | kleiner LLOQ | #VALUE! | 1    | #VALUE! |
| 0     | T9 | B11 | 0     | 0     | kleiner LLOQ | #VALUE! | 1    | #VALUE! |
| 0     | T9 | B12 | 0     | 0     | kleiner LLOQ | #VALUE! | 1    | #VALUE! |
| 0     | T9 | C01 | 0     | 0     | kleiner LLOQ | #VALUE! | 1    | #VALUE! |
| 0     | T9 | C02 | 0     | 0     | kleiner LLOQ | #VALUE! | 1    | #VALUE! |
| 0     | T9 | C03 | 0     | 0     | kleiner LLOQ | #VALUE! | 1    | #VALUE! |
| 0     | T9 | C04 | 0     | 0     | kleiner LLOQ | #VALUE! | 1    | #VALUE! |
| 0     | T9 | C05 | 0     | 0     | kleiner LLOQ | #VALUE! | 1    | #VALUE! |
| 0     | T9 | C06 | 0     | 0     | kleiner LLOQ | #VALUE! | 1    | #VALUE! |
| 0     | T9 | C07 | 0     | 0     | kleiner LLOQ | #VALUE! | 1    | #VALUE! |
| 0     | T9 | C08 | 0     | 0     | kleiner LLOQ | #VALUE! | 1    | #VALUE! |
| 0     | T9 | C09 | 0     | 0     | kleiner LLOQ | #VALUE! | 1    | #VALUE! |
| 0     | T9 | C10 | 0     | 0     | kleiner LLOQ | #VALUE! | 1    | #VALUE! |
| 0     | T9 | C11 | 0     | 0     | kleiner LLOQ | #VALUE! | 1    | #VALUE! |
| 0     | T9 | C12 | 0     | 0     | kleiner LLOQ | #VALUE! | 1    | #VALUE! |
| 0     | T9 | D01 | 0     | 0     | kleiner LLOQ | #VALUE! | 1    | #VALUE! |
| 0     | T9 | D02 | 0     | 0     | kleiner LLOQ | #VALUE! | 1    | #VALUE! |
| 0     | T9 | D03 | 0     | 0     | kleiner LLOQ | #VALUE! | 1    | #VALUE! |
| 0     | T9 | D04 | 0     | 0     | kleiner LLOQ | #VALUE! | 1    | #VALUE! |
| 0     | T9 | D05 | 0     | 0     | kleiner LLOQ | #VALUE! | 1    | #VALUE! |
| 0     | T9 | D06 | 0     | 0     | kleiner LLOQ | #VALUE! | 1    | #VALUE! |
| T9SN2 | T9 | D07 | 0.331 | 0.280 | 0.280        | 0.012   | 2.75 | 0.032   |
| T9SN2 | T9 | D08 | 0.343 | 0.292 | 0.292        | 0.012   | 2.75 | 0.034   |
| T9SN3 | T9 | D09 | 0.621 | 0.570 | 0.570        | 0.025   | 2.75 | 0.070   |
| T9SN3 | T9 | D10 | 0.661 | 0.610 | 0.610        | 0.027   | 2.75 | 0.075   |
| T9SN4 | T9 | D11 | 0.691 | 0.641 | 0.641        | 0.029   | 2.75 | 0.079   |
| T9SN4 | T9 | D12 | 0.644 | 0.593 | 0.593        | 0.027   | 2.75 | 0.073   |

Plate: T9

|   |   |   |   |   |       |       |       |       |       |       |       |       |       |
|---|---|---|---|---|-------|-------|-------|-------|-------|-------|-------|-------|-------|
|   | 1 | 2 | 3 | 4 | 5     | 6     | 7     | 8     | 9     | 10    | 11    | 12    |       |
| A |   |   |   |   |       |       |       |       |       |       |       |       |       |
| B |   |   |   |   |       |       |       |       |       |       |       |       |       |
| C |   |   |   |   |       |       |       |       |       |       |       |       |       |
| D |   |   |   |   |       |       |       | 0.331 | 0.343 | 0.621 | 0.661 | 0.691 | 0.644 |
| E |   |   |   |   | 0.415 | 0.405 | 0.204 | 0.207 | 0.138 | 0.133 | 0.233 | 0.231 |       |
| F |   |   |   |   | 0.295 | 0.327 | 0.199 | 0.193 | 0.277 | 0.307 | 0.271 | 0.291 |       |
| G |   |   |   |   |       |       | 0.051 | 0.051 | 0.051 | 0.051 | 0.051 | 0.050 |       |
| H |   |   |   |   |       |       | 0.050 | 0.049 | 0.050 | 0.050 | 0.050 | 0.050 |       |

Plattenbelegung

|   |   |   |   |   |        |        |              |              |              |              |              |              |
|---|---|---|---|---|--------|--------|--------------|--------------|--------------|--------------|--------------|--------------|
|   | 1 | 2 | 3 | 4 | 5      | 6      | 7            | 8            | 9            | 10           | 11           | 12           |
| A |   |   |   |   |        |        |              |              |              |              |              |              |
| B |   |   |   |   |        |        |              |              |              |              |              |              |
| C |   |   |   |   |        |        |              |              |              |              |              |              |
| D |   |   |   |   |        |        |              |              |              |              |              |              |
| E |   |   |   |   | T9SS11 | T9SS11 | T9SS12       | T9SS12       | T9SS13       | T9SS13       | T9SN4        | T9SN4        |
| F |   |   |   |   | T9SS21 | T9SS21 | T9SS22       | T9SS22       | T9SS23       | T9SS23       | T9SS24       | T9SS24       |
| G |   |   |   |   |        |        | Blank PEG    | Blank PEG    | Blank PEG    | Blank PEG    | Blank PEG    | Blank PEG    |
| H |   |   |   |   |        |        | Blank no PEG | Blank no PEG | Blank no PEG | Blank no PEG | Blank no PEG | Blank no PEG |

Comment:

Date Operator

Date Control

|              |     |     |       |       |              |         |      |         |
|--------------|-----|-----|-------|-------|--------------|---------|------|---------|
| 0            | T9  | E01 | 0     | 0     | kleiner LLOQ | #VALUE! | 1    | #VALUE! |
| 0            | T9  | E02 | 0     | 0     | kleiner LLOQ | #VALUE! | 1    | #VALUE! |
| 0            | T9  | E03 | 0     | 0     | kleiner LLOQ | #VALUE! | 1    | #VALUE! |
| 0            | T9  | E04 | 0     | 0     | kleiner LLOQ | #VALUE! | 1    | #VALUE! |
| T9SS11       | T9  | E05 | 0.415 | 0.364 | 0.364        | 0.016   | 2.75 | 0.043   |
| T9SS11       | T9  | E06 | 0.405 | 0.354 | 0.354        | 0.015   | 2.75 | 0.042   |
| T9SS12       | T9  | E07 | 0.204 | 0.153 | kleiner LLOQ | #VALUE! | 2.75 | #VALUE! |
| T9SS12       | T9  | E08 | 0.207 | 0.156 | kleiner LLOQ | #VALUE! | 2.75 | #VALUE! |
| T9SS13       | T9  | E09 | 0.138 | 0.087 | kleiner LLOQ | #VALUE! | 2.75 | #VALUE! |
| T9SS13       | T9  | E10 | 0.133 | 0.083 | kleiner LLOQ | #VALUE! | 2.75 | #VALUE! |
| T9SS14       | T9  | E11 | 0.233 | 0.183 | 0.183        | 0.007   | 2.75 | 0.019   |
| T9SS14       | T9  | E12 | 0.231 | 0.180 | 0.180        | 0.007   | 2.75 | 0.019   |
| 0            | T9  | F01 | 0     | 0     | kleiner LLOQ | #VALUE! | 1    | #VALUE! |
| 0            | T9  | F02 | 0     | 0     | kleiner LLOQ | #VALUE! | 1    | #VALUE! |
| 0            | T9  | F03 | 0     | 0     | kleiner LLOQ | #VALUE! | 1    | #VALUE! |
| 0            | T9  | F04 | 0     | 0     | kleiner LLOQ | #VALUE! | 1    | #VALUE! |
| T9SS21       | T9  | F05 | 0.295 | 0.244 | 0.244        | 0.010   | 2.75 | 0.027   |
| T9SS21       | T9  | F06 | 0.327 | 0.276 | 0.276        | 0.012   | 2.75 | 0.032   |
| T9SS22       | T9  | F07 | 0.199 | 0.149 | kleiner LLOQ | #VALUE! | 2.75 | #VALUE! |
| T9SS22       | T9  | F08 | 0.193 | 0.142 | kleiner LLOQ | #VALUE! | 2.75 | #VALUE! |
| T9SS23       | T9  | F09 | 0.277 | 0.226 | 0.226        | 0.009   | 2.75 | 0.025   |
| T9SS23       | T9  | F10 | 0.307 | 0.256 | 0.256        | 0.011   | 2.75 | 0.029   |
| T9SS24       | T9  | F11 | 0.271 | 0.220 | 0.220        | 0.009   | 2.75 | 0.024   |
| T9SS24       | T9  | F12 | 0.291 | 0.240 | 0.240        | 0.010   | 2.75 | 0.027   |
| 0            | T9  | G01 | 0     | 0     | kleiner LLOQ | #VALUE! | 1    | #VALUE! |
| 0            | T9  | G02 | 0     | 0     | kleiner LLOQ | #VALUE! | 1    | #VALUE! |
| 0            | T9  | G03 | 0     | 0     | kleiner LLOQ | #VALUE! | 1    | #VALUE! |
| 0            | T9  | G04 | 0     | 0     | kleiner LLOQ | #VALUE! | 1    | #VALUE! |
| 0            | T9  | G05 | 0     | 0     | kleiner LLOQ | #VALUE! | 1    | #VALUE! |
| 0            | T9  | G06 | 0     | 0     | kleiner LLOQ | #VALUE! | 1    | #VALUE! |
| Blank PEG    | T9  | G07 | 0     | 0     | kleiner LLOQ | #VALUE! | 2.75 | #VALUE! |
| Blank PEG    | T9  | G08 | 0     | 0     | kleiner LLOQ | #VALUE! | 2.75 | #VALUE! |
| Blank PEG    | T9  | G09 | 0     | 0     | kleiner LLOQ | #VALUE! | 2.75 | #VALUE! |
| Blank PEG    | T9  | G10 | 0     | 0     | kleiner LLOQ | #VALUE! | 2.75 | #VALUE! |
| Blank PEG    | T9  | G11 | 0     | 0     | kleiner LLOQ | #VALUE! | 2.75 | #VALUE! |
| Blank PEG    | T9  | G12 | 0     | 0     | kleiner LLOQ | #VALUE! | 2.75 | #VALUE! |
| 0            | T9  | H01 | 0     | 0     | kleiner LLOQ | #VALUE! | 1    | #VALUE! |
| 0            | T9  | H02 | 0     | 0     | kleiner LLOQ | #VALUE! | 1    | #VALUE! |
| 0            | T9  | H03 | 0     | 0     | kleiner LLOQ | #VALUE! | 1    | #VALUE! |
| 0            | T9  | H04 | 0     | 0     | kleiner LLOQ | #VALUE! | 1    | #VALUE! |
| 0            | T9  | H05 | 0     | 0     | kleiner LLOQ | #VALUE! | 1    | #VALUE! |
| 0            | T9  | H06 | 0     | 0     | kleiner LLOQ | #VALUE! | 1    | #VALUE! |
| Blank no PEG | T9  | H07 | 0     | 0     | kleiner LLOQ | #VALUE! | 2.75 | #VALUE! |
| Blank no PEG | T9  | H08 | 0     | 0     | kleiner LLOQ | #VALUE! | 2.75 | #VALUE! |
| Blank no PEG | T9  | H09 | 0     | 0     | kleiner LLOQ | #VALUE! | 2.75 | #VALUE! |
| Blank no PEG | T9  | H10 | 0     | 0     | kleiner LLOQ | #VALUE! | 2.75 | #VALUE! |
| Blank no PEG | T9  | H11 | 0     | 0     | kleiner LLOQ | #VALUE! | 2.75 | #VALUE! |
| Blank no PEG | T9  | H12 | 0     | 0     | kleiner LLOQ | #VALUE! | 2.75 | #VALUE! |
| 0            | T10 | A01 | 0     | 0     | kleiner LLOQ | #VALUE! | 1    | #VALUE! |
| 0            | T10 | A02 | 0     | 0     | kleiner LLOQ | #VALUE! | 1    | #VALUE! |
| 0            | T10 | A03 | 0     | 0     | kleiner LLOQ | #VALUE! | 1    | #VALUE! |
| 0            | T10 | A04 | 0     | 0     | kleiner LLOQ | #VALUE! | 1    | #VALUE! |
| 0            | T10 | A05 | 0     | 0     | kleiner LLOQ | #VALUE! | 1    | #VALUE! |
| 0            | T10 | A06 | 0     | 0     | kleiner LLOQ | #VALUE! | 1    | #VALUE! |
| 0            | T10 | A07 | 0     | 0     | kleiner LLOQ | #VALUE! | 1    | #VALUE! |
| 0            | T10 | A08 | 0     | 0     | kleiner LLOQ | #VALUE! | 1    | #VALUE! |
| 0            | T10 | A09 | 0     | 0     | kleiner LLOQ | #VALUE! | 1    | #VALUE! |
| 0            | T10 | A10 | 0     | 0     | kleiner LLOQ | #VALUE! | 1    | #VALUE! |
| 0            | T10 | A11 | 0     | 0     | kleiner LLOQ | #VALUE! | 1    | #VALUE! |
| 0            | T10 | A12 | 0     | 0     | kleiner LLOQ | #VALUE! | 1    | #VALUE! |
| 0            | T10 | B01 | 0     | 0     | kleiner LLOQ | #VALUE! | 1    | #VALUE! |
| 0            | T10 | B02 | 0     | 0     | kleiner LLOQ | #VALUE! | 1    | #VALUE! |
| 0            | T10 | B03 | 0     | 0     | kleiner LLOQ | #VALUE! | 1    | #VALUE! |
| 0            | T10 | B04 | 0     | 0     | kleiner LLOQ | #VALUE! | 1    | #VALUE! |
| 0            | T10 | B05 | 0     | 0     | kleiner LLOQ | #VALUE! | 1    | #VALUE! |
| 0            | T10 | B06 | 0     | 0     | kleiner LLOQ | #VALUE! | 1    | #VALUE! |
| 0            | T10 | B07 | 0     | 0     | kleiner LLOQ | #VALUE! | 1    | #VALUE! |
| 0            | T10 | B08 | 0     | 0     | kleiner LLOQ | #VALUE! | 1    | #VALUE! |
| 0            | T10 | B09 | 0     | 0     | kleiner LLOQ | #VALUE! | 1    | #VALUE! |
| 0            | T10 | B10 | 0     | 0     | kleiner LLOQ | #VALUE! | 1    | #VALUE! |
| 0            | T10 | B11 | 0     | 0     | kleiner LLOQ | #VALUE! | 1    | #VALUE! |
| 0            | T10 | B12 | 0     | 0     | kleiner LLOQ | #VALUE! | 1    | #VALUE! |
| 0            | T10 | C01 | 0     | 0     | kleiner LLOQ | #VALUE! | 1    | #VALUE! |

Plate: T10

|   | 1 | 2 | 3 | 4 | 5 | 6     | 7     | 8     | 9     | 10    | 11    | 12    |       |
|---|---|---|---|---|---|-------|-------|-------|-------|-------|-------|-------|-------|
| A |   |   |   |   |   |       |       |       |       |       |       |       |       |
| B |   |   |   |   |   |       |       |       |       |       |       |       |       |
| C |   |   |   |   |   |       |       |       |       |       |       |       |       |
| D |   |   |   |   |   |       |       | 0.493 | 0.502 | 0.540 | 0.537 | 0.680 | 0.722 |
| E |   |   |   |   |   | 0.377 | 0.373 | 0.217 | 0.208 |       |       | 0.232 | 0.233 |
| F |   |   |   |   |   | 0.367 | 0.392 | 0.195 | 0.226 | 0.257 | 0.308 | 0.408 |       |
| G |   |   |   |   |   |       |       | 0.051 | 0.051 | 0.051 | 0.053 | 0.051 | 0.054 |
| H |   |   |   |   |   |       |       | 0.050 | 0.050 | 0.052 | 0.051 | 0.050 | 0.050 |

Plattenbelegung

|   | 1 | 2 | 3 | 4 | 5       | 6       | 7       | 8       | 9      | 10     | 11      | 12      |
|---|---|---|---|---|---------|---------|---------|---------|--------|--------|---------|---------|
| A |   |   |   |   |         |         |         |         |        |        |         |         |
| B |   |   |   |   |         |         |         |         |        |        |         |         |
| C |   |   |   |   |         |         |         |         |        |        |         |         |
| D |   |   |   |   |         |         |         |         |        |        |         |         |
| E |   |   |   |   | T10SS11 | T10SS11 | T10SN2  | T10SN2  | T10SN3 | T10SN3 | T10SN4  | T10SN4  |
|   |   |   |   |   |         |         | T10SS12 | T10SS12 |        |        | T10SS14 | T10SS14 |





|           |     |     |       |       |              |         |      |         |
|-----------|-----|-----|-------|-------|--------------|---------|------|---------|
| 0         | T11 | A06 | 0     | 0     | kleiner LLOQ | #VALUE! | 1    | #VALUE! |
| 0         | T11 | A07 | 0     | 0     | kleiner LLOQ | #VALUE! | 1    | #VALUE! |
| 0         | T11 | A08 | 0     | 0     | kleiner LLOQ | #VALUE! | 1    | #VALUE! |
| 0         | T11 | A09 | 0     | 0     | kleiner LLOQ | #VALUE! | 1    | #VALUE! |
| 0         | T11 | A10 | 0     | 0     | kleiner LLOQ | #VALUE! | 1    | #VALUE! |
| 0         | T11 | A11 | 0     | 0     | kleiner LLOQ | #VALUE! | 1    | #VALUE! |
| 0         | T11 | A12 | 0     | 0     | kleiner LLOQ | #VALUE! | 1    | #VALUE! |
| 0         | T11 | B01 | 0     | 0     | kleiner LLOQ | #VALUE! | 1    | #VALUE! |
| 0         | T11 | B02 | 0     | 0     | kleiner LLOQ | #VALUE! | 1    | #VALUE! |
| 0         | T11 | B03 | 0     | 0     | kleiner LLOQ | #VALUE! | 1    | #VALUE! |
| 0         | T11 | B04 | 0     | 0     | kleiner LLOQ | #VALUE! | 1    | #VALUE! |
| 0         | T11 | B05 | 0     | 0     | kleiner LLOQ | #VALUE! | 1    | #VALUE! |
| 0         | T11 | B06 | 0     | 0     | kleiner LLOQ | #VALUE! | 1    | #VALUE! |
| 0         | T11 | B07 | 0     | 0     | kleiner LLOQ | #VALUE! | 1    | #VALUE! |
| 0         | T11 | B08 | 0     | 0     | kleiner LLOQ | #VALUE! | 1    | #VALUE! |
| 0         | T11 | B09 | 0     | 0     | kleiner LLOQ | #VALUE! | 1    | #VALUE! |
| 0         | T11 | B10 | 0     | 0     | kleiner LLOQ | #VALUE! | 1    | #VALUE! |
| 0         | T11 | B11 | 0     | 0     | kleiner LLOQ | #VALUE! | 1    | #VALUE! |
| 0         | T11 | B12 | 0     | 0     | kleiner LLOQ | #VALUE! | 1    | #VALUE! |
| 0         | T11 | C01 | 0     | 0     | kleiner LLOQ | #VALUE! | 1    | #VALUE! |
| 0         | T11 | C02 | 0     | 0     | kleiner LLOQ | #VALUE! | 1    | #VALUE! |
| 0         | T11 | C03 | 0     | 0     | kleiner LLOQ | #VALUE! | 1    | #VALUE! |
| 0         | T11 | C04 | 0     | 0     | kleiner LLOQ | #VALUE! | 1    | #VALUE! |
| 0         | T11 | C05 | 0     | 0     | kleiner LLOQ | #VALUE! | 1    | #VALUE! |
| 0         | T11 | C06 | 0     | 0     | kleiner LLOQ | #VALUE! | 1    | #VALUE! |
| 0         | T11 | C07 | 0     | 0     | kleiner LLOQ | #VALUE! | 1    | #VALUE! |
| 0         | T11 | C08 | 0     | 0     | kleiner LLOQ | #VALUE! | 1    | #VALUE! |
| 0         | T11 | C09 | 0     | 0     | kleiner LLOQ | #VALUE! | 1    | #VALUE! |
| 0         | T11 | C10 | 0     | 0     | kleiner LLOQ | #VALUE! | 1    | #VALUE! |
| 0         | T11 | C11 | 0     | 0     | kleiner LLOQ | #VALUE! | 1    | #VALUE! |
| 0         | T11 | C12 | 0     | 0     | kleiner LLOQ | #VALUE! | 1    | #VALUE! |
| 0         | T11 | D01 | 0     | 0     | kleiner LLOQ | #VALUE! | 1    | #VALUE! |
| 0         | T11 | D02 | 0     | 0     | kleiner LLOQ | #VALUE! | 1    | #VALUE! |
| 0         | T11 | D03 | 0     | 0     | kleiner LLOQ | #VALUE! | 1    | #VALUE! |
| 0         | T11 | D04 | 0     | 0     | kleiner LLOQ | #VALUE! | 1    | #VALUE! |
| 0         | T11 | D05 | 0     | 0     | kleiner LLOQ | #VALUE! | 1    | #VALUE! |
| 0         | T11 | D06 | 0     | 0     | kleiner LLOQ | #VALUE! | 1    | #VALUE! |
| T11SN2    | T11 | D07 | 0.358 | 0.307 | 0.307        | 0.013   | 2.75 | 0.036   |
| T11SN2    | T11 | D08 | 0.336 | 0.285 | 0.285        | 0.012   | 2.75 | 0.033   |
| T11SN3    | T11 | D09 | 0.471 | 0.420 | 0.420        | 0.018   | 2.75 | 0.050   |
| T11SN3    | T11 | D10 | 0.480 | 0.429 | 0.429        | 0.019   | 2.75 | 0.052   |
| T11SN4    | T11 | D11 | 0.747 | 0.696 | 0.696        | 0.031   | 2.75 | 0.087   |
| T11SN4    | T11 | D12 | 0.716 | 0.665 | 0.665        | 0.030   | 2.75 | 0.083   |
| 0         | T11 | E01 | 0     | 0     | kleiner LLOQ | #VALUE! | 1    | #VALUE! |
| 0         | T11 | E02 | 0     | 0     | kleiner LLOQ | #VALUE! | 1    | #VALUE! |
| 0         | T11 | E03 | 0     | 0     | kleiner LLOQ | #VALUE! | 1    | #VALUE! |
| 0         | T11 | E04 | 0     | 0     | kleiner LLOQ | #VALUE! | 1    | #VALUE! |
| T11SS11   | T11 | E05 | 0.423 | 0.372 | 0.372        | 0.016   | 2.75 | 0.044   |
| T11SS11   | T11 | E06 | 0.402 | 0.351 | 0.351        | 0.015   | 2.75 | 0.041   |
| T11SS12   | T11 | E07 | 0.227 | 0.176 | 0.176        | 0.007   | 2.75 | 0.019   |
| T11SS12   | T11 | E08 | 0.267 | 0.216 | 0.216        | 0.009   | 2.75 | 0.024   |
| T11SS13   | T11 | E09 | 0.154 | 0.103 | kleiner LLOQ | #VALUE! | 2.75 | #VALUE! |
| T11SS13   | T11 | E10 | 0.156 | 0.105 | kleiner LLOQ | #VALUE! | 2.75 | #VALUE! |
| T11SS14   | T11 | E11 | 0.234 | 0.183 | 0.183        | 0.007   | 2.75 | 0.020   |
| T11SS14   | T11 | E12 | 0.235 | 0.184 | 0.184        | 0.007   | 2.75 | 0.020   |
| 0         | T11 | F01 | 0     | 0     | kleiner LLOQ | #VALUE! | 1    | #VALUE! |
| 0         | T11 | F02 | 0     | 0     | kleiner LLOQ | #VALUE! | 1    | #VALUE! |
| 0         | T11 | F03 | 0     | 0     | kleiner LLOQ | #VALUE! | 1    | #VALUE! |
| 0         | T11 | F04 | 0     | 0     | kleiner LLOQ | #VALUE! | 1    | #VALUE! |
| T11SS21   | T11 | F05 | 0.354 | 0.303 | 0.303        | 0.013   | 2.75 | 0.035   |
| T11SS21   | T11 | F06 | 0.398 | 0.347 | 0.347        | 0.015   | 2.75 | 0.041   |
| T11SS22   | T11 | F07 | 0.217 | 0.166 | kleiner LLOQ | #VALUE! | 2.75 | #VALUE! |
| T11SS22   | T11 | F08 | 0.229 | 0.178 | 0.178        | 0.007   | 2.75 | 0.019   |
| T11SS23   | T11 | F09 | 0.248 | 0.198 | 0.198        | 0.008   | 2.75 | 0.021   |
| T11SS23   | T11 | F10 | 0.272 | 0.221 | 0.221        | 0.009   | 2.75 | 0.024   |
| T11SS24   | T11 | F11 | 0.308 | 0.257 | 0.257        | 0.011   | 2.75 | 0.029   |
| T11SS24   | T11 | F12 | 0.317 | 0.266 | 0.266        | 0.011   | 2.75 | 0.030   |
| 0         | T11 | G01 | 0     | 0     | kleiner LLOQ | #VALUE! | 1    | #VALUE! |
| 0         | T11 | G02 | 0     | 0     | kleiner LLOQ | #VALUE! | 1    | #VALUE! |
| 0         | T11 | G03 | 0     | 0     | kleiner LLOQ | #VALUE! | 1    | #VALUE! |
| 0         | T11 | G04 | 0     | 0     | kleiner LLOQ | #VALUE! | 1    | #VALUE! |
| 0         | T11 | G05 | 0     | 0     | kleiner LLOQ | #VALUE! | 1    | #VALUE! |
| 0         | T11 | G06 | 0     | 0     | kleiner LLOQ | #VALUE! | 1    | #VALUE! |
| Blank PEG | T11 | G07 | 0     | 0     | kleiner LLOQ | #VALUE! | 2.75 | #VALUE! |

Plate: T11

|   |   |   |   |   |       |       |       |       |       |       |       |       |       |
|---|---|---|---|---|-------|-------|-------|-------|-------|-------|-------|-------|-------|
|   | 1 | 2 | 3 | 4 | 5     | 6     | 7     | 8     | 9     | 10    | 11    | 12    |       |
| A |   |   |   |   |       |       |       |       |       |       |       |       |       |
| B |   |   |   |   |       |       |       |       |       |       |       |       |       |
| C |   |   |   |   |       |       |       |       |       |       |       |       |       |
| D |   |   |   |   |       |       |       | 0.358 | 0.336 | 0.471 | 0.480 | 0.747 | 0.716 |
| E |   |   |   |   | 0.423 | 0.402 | 0.227 | 0.267 | 0.154 | 0.156 | 0.234 | 0.235 |       |
| F |   |   |   |   | 0.354 | 0.398 | 0.217 | 0.229 | 0.248 | 0.272 | 0.308 | 0.317 |       |
| G |   |   |   |   |       |       |       | 0.052 | 0.052 | 0.052 | 0.056 | 0.052 | 0.052 |
| H |   |   |   |   |       |       |       | 0.050 | 0.050 | 0.050 | 0.050 | 0.050 | 0.049 |

Plattenbelegung

|   |   |   |   |   |         |         |              |              |              |              |              |              |
|---|---|---|---|---|---------|---------|--------------|--------------|--------------|--------------|--------------|--------------|
|   | 1 | 2 | 3 | 4 | 5       | 6       | 7            | 8            | 9            | 10           | 11           | 12           |
| A |   |   |   |   |         |         |              |              |              |              |              |              |
| B |   |   |   |   |         |         |              |              |              |              |              |              |
| C |   |   |   |   |         |         |              |              |              |              |              |              |
| D |   |   |   |   |         |         | T11SN2       | T11SN2       | T11SN3       | T11SN3       | T11SN4       | T11SN4       |
| E |   |   |   |   | T11SS11 | T11SS11 | T11SS12      | T11SS12      | T11SS13      | T11SS13      | T11SS14      | T11SS14      |
| F |   |   |   |   | T11SS21 | T11SS21 | T11SS22      | T11SS22      | T11SS23      | T11SS23      | T11SS24      | T11SS24      |
| G |   |   |   |   |         |         | Blank PEG    | Blank PEG    | Blank PEG    | Blank PEG    | Blank PEG    | Blank PEG    |
| H |   |   |   |   |         |         | Blank no PEG | Blank no PEG | Blank no PEG | Blank no PEG | Blank no PEG | Blank no PEG |

Comment:

Date Operator Date Control

|              |     |     |   |   |              |         |      |         |
|--------------|-----|-----|---|---|--------------|---------|------|---------|
| Blank PEG    | T11 | G08 | 0 | 0 | kleiner LLOQ | #VALUE! | 2.75 | #VALUE! |
| Blank PEG    | T11 | G09 | 0 | 0 | kleiner LLOQ | #VALUE! | 2.75 | #VALUE! |
| Blank PEG    | T11 | G10 | 0 | 0 | kleiner LLOQ | #VALUE! | 2.75 | #VALUE! |
| Blank PEG    | T11 | G11 | 0 | 0 | kleiner LLOQ | #VALUE! | 2.75 | #VALUE! |
| Blank PEG    | T11 | G12 | 0 | 0 | kleiner LLOQ | #VALUE! | 2.75 | #VALUE! |
| 0            | T11 | H01 | 0 | 0 | kleiner LLOQ | #VALUE! | 1    | #VALUE! |
| 0            | T11 | H02 | 0 | 0 | kleiner LLOQ | #VALUE! | 1    | #VALUE! |
| 0            | T11 | H03 | 0 | 0 | kleiner LLOQ | #VALUE! | 1    | #VALUE! |
| 0            | T11 | H04 | 0 | 0 | kleiner LLOQ | #VALUE! | 1    | #VALUE! |
| 0            | T11 | H05 | 0 | 0 | kleiner LLOQ | #VALUE! | 1    | #VALUE! |
| 0            | T11 | H06 | 0 | 0 | kleiner LLOQ | #VALUE! | 1    | #VALUE! |
| Blank no PEG | T11 | H07 | 0 | 0 | kleiner LLOQ | #VALUE! | 2.75 | #VALUE! |
| Blank no PEG | T11 | H08 | 0 | 0 | kleiner LLOQ | #VALUE! | 2.75 | #VALUE! |
| Blank no PEG | T11 | H09 | 0 | 0 | kleiner LLOQ | #VALUE! | 2.75 | #VALUE! |
| Blank no PEG | T11 | H10 | 0 | 0 | kleiner LLOQ | #VALUE! | 2.75 | #VALUE! |
| Blank no PEG | T11 | H11 | 0 | 0 | kleiner LLOQ | #VALUE! | 2.75 | #VALUE! |
| Blank no PEG | T11 | H12 | 0 | 0 | kleiner LLOQ | #VALUE! | 2.75 | #VALUE! |

|                    |              |                            |                         |                         |                              |
|--------------------|--------------|----------------------------|-------------------------|-------------------------|------------------------------|
| Project number     | F-120        | Apparatus                  | Wallac Victor           | Operator                | IsBa                         |
| GLP Study (Number) | n.a.         | Protocol (Instrument meth) | LDH test 2016           | Date of preparation     | 19-04-18                     |
| hot substance      | isotope      | n.a.                       | File name (results)     | IsBa_180419/20_LDH_full | Date of measurement          |
|                    | name         | n.a.                       | Kind of well plate      | 96 well                 | shaking time [min]           |
| cold substance     | ACB-ID       | n.a.                       | sample volume [µL]      | 100                     | stirring rate (Target) [rpm] |
|                    | Batch number | n.a.                       | Cocktail volume [µL]    | 175                     | Kind of measurement          |
| n.a.               | name         | LDH                        | ACB-ID of cocktail      |                         | Wave length [nm]             |
|                    | ACB-ID       | L23982R                    | Matrix                  | DMEM (from powder)+PE   | Remarks                      |
| n.a.               | Batch number | SLBK6345V                  | Blank description       | DMEM/PEG, H2O           | Remarks                      |
|                    |              |                            | Pipettes (No. / volume) | 50-200µl                | Remarks                      |
| n.a.               | n.a.         | Pipettes (No. / volume)    | n.a.                    | Remarks                 | n.a.                         |

Messdaten (diese Tabelle in Bericht übernehmen)

| Sample name * | concentration (theor.) * | measured data | measured data | measured data | mean measured | SD   | RSD  | Blank * | measured data after * | concentration (calc.) * | Deviation * | Residuen |
|---------------|--------------------------|---------------|---------------|---------------|---------------|------|------|---------|-----------------------|-------------------------|-------------|----------|
|               | [µg/mL]                  | [AU]          | [AU]          | [AU]          | [AU]          | [AU] | [%]  | [AU]    | Blank subtraction     | [µg/mL]                 | [%]         |          |
| KLP1          | 0.148                    | 1.579         | 1.652         | 1.627         | 1.62          | 0.03 | 1.87 | 0.047   | 1.568                 | 0.148                   | -0.24       | 0.00     |
| KLP2          | 0.114                    | 1.357         | 1.443         | 1.372         | 1.39          | 0.04 | 2.70 | 0.054   | 1.340                 | 0.110                   | -3.40       | 0.00     |
| KLP3          | 0.074                    | 1.272         | 1.193         | 1.228         | 1.23          | 0.03 | 2.63 | 0.051   | 1.180                 | 0.084                   | 13.04       | 0.01     |
| KLP4          | 0.041                    | 0.959         | 0.972         | 0.883         | 0.94          | 0.04 | 4.19 | 0.051   | 0.887                 | 0.035                   | -13.32      | -0.01    |
| KLP5          |                          |               |               |               |               |      |      | 0.052   |                       |                         |             |          |
| KLP6          |                          |               |               |               |               |      |      | 0.051   |                       |                         |             |          |
| KLP7          |                          |               |               |               |               |      |      |         |                       |                         |             |          |
| KLP8          |                          |               |               |               |               |      |      |         |                       |                         |             |          |

Statistical data

|                                              |                                          |                     |             |
|----------------------------------------------|------------------------------------------|---------------------|-------------|
| Geradensteigung                              | Slope                                    | m                   | 6.05        |
| Y-Achsenabschnitt                            | Y-intercept                              | b                   | 0.67        |
| Standardabw. Geradensteigung                 | SD-Slope                                 | S <sub>m</sub>      | 0.620291227 |
| Standardabw. Achsenabschnittes               | SD-Y-Intercept                           | S <sub>b</sub>      | 0.063894294 |
| Anzahl Messpunkte                            | number of measuring points               | n                   | 4           |
| Quadratsumme                                 | sum of squares                           | Q <sub>xx</sub>     | 0.006578604 |
| Bereichsmittle                               |                                          | f                   | 0.094336926 |
| Freiheitsgrade                               | degree of freedom                        | f                   | 2           |
| Student-t-Faktor für (P = 95 %; f = n-2)     | Student-t-factor for (P = 95 %; f = n-2) | t                   | 4.303       |
| Vertrauensbereich Steig. (95 %) Obergrenze   |                                          | m + VB <sub>m</sub> | 8.722319627 |
| Vertrauensbereich Steig. (95 %) Untergrenze  |                                          | m - VB <sub>m</sub> | 3.384093228 |
| Vertrauensbereich Achsenabschnitt (95 %) Og. |                                          | b + VB <sub>b</sub> | 0.946914615 |
| Vertrauensbereich Achsenabschnitt (95 %) Ug. |                                          | b - VB <sub>b</sub> | 0.398761518 |
| Korrelationskoeffizient                      | correlation coefficient                  | r                   | 0.9897      |
| Bestimmtheitsmaß                             | determination coefficient                | r <sup>2</sup>      | 0.9794      |
| Reststandardabweichung                       |                                          | S <sub>0</sub>      | 0.050310948 |
| Summe Restquadrat                            |                                          | sd                  | 2.895683345 |
| Verfahrensstandardabw.                       |                                          | S <sub>0p</sub>     | 0.008311454 |
| Rel. Verfahrensstandardabw. %                |                                          | V <sub>0p</sub>     | 8.810393374 |

|                          |       |
|--------------------------|-------|
| mean Blank               | 0     |
| SD Blank                 | 0.00  |
| RSD Blank                | 3.79  |
| x <sup>2</sup> SD (LLOQ) | 0     |
| x <sup>2</sup> SD (LOD)  | 0     |
| LLOQ (AU)                | 0     |
| LOD (AU)                 | 0     |
| LLOQ                     | 1.568 |
| LLOQ (Lin)               | 0.887 |

Evaluation / Comment

LDH linearity valid with 7 standards, split in lin high and lin low, each with 4 standards and KLP4 common standard for both. R<sup>2</sup> 0,9981, deviations for both between -13.34% and +13.04%

Date

Operator

Date

Control

Figure 1 Linearity



Figure 2 Method validation Residuen Plot

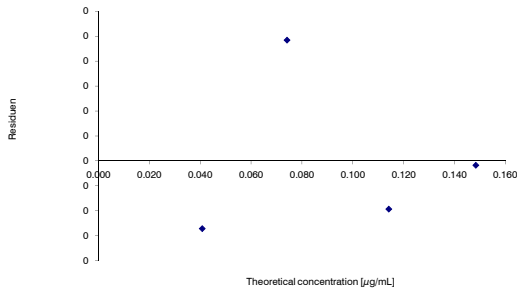

Evaluation / Comment

lin passed

Date

Operator

Date

Control

| Sample name | Plate | Position | [AU]  | [AU]-Blank | Rating       | [µg/mL] | Dilution factor | [µg/mL] |
|-------------|-------|----------|-------|------------|--------------|---------|-----------------|---------|
| 0           | T8    | A01      | 0     | 0          | kleiner LLOQ | #VALUE! | 1               | #VALUE! |
| 0           | T8    | A02      | 0     | 0          | kleiner LLOQ | #VALUE! | 1               | #VALUE! |
| 0           | T8    | A03      | 0     | 0          | kleiner LLOQ | #VALUE! | 1               | #VALUE! |
| 0           | T8    | A04      | 0     | 0          | kleiner LLOQ | #VALUE! | 1               | #VALUE! |
| 0           | T8    | A05      | 0.000 | -0.051     | kleiner LLOQ | #VALUE! | 1               | #VALUE! |
| 0           | T8    | A06      | 0.000 | -0.051     | kleiner LLOQ | #VALUE! | 1               | #VALUE! |
| 0           | T8    | A07      | 0     | 0          | kleiner LLOQ | #VALUE! | 1               | #VALUE! |
| 0           | T8    | A08      | 0     | 0          | kleiner LLOQ | #VALUE! | 1               | #VALUE! |
| 0           | T8    | A09      | 0.000 | -0.051     | kleiner LLOQ | #VALUE! | 1               | #VALUE! |
| 0           | T8    | A10      | 0.000 | -0.051     | kleiner LLOQ | #VALUE! | 1               | #VALUE! |
| 0           | T8    | A11      | 0     | 0          | kleiner LLOQ | #VALUE! | 1               | #VALUE! |
| 0           | T8    | A12      | 0     | 0          | kleiner LLOQ | #VALUE! | 1               | #VALUE! |
| 0           | T8    | B01      | 0     | 0          | kleiner LLOQ | #VALUE! | 1               | #VALUE! |
| 0           | T8    | B02      | 0     | 0          | kleiner LLOQ | #VALUE! | 1               | #VALUE! |
| 0           | T8    | B03      | 0     | 0          | kleiner LLOQ | #VALUE! | 1               | #VALUE! |
| 0           | T8    | B04      | 0     | 0          | kleiner LLOQ | #VALUE! | 1               | #VALUE! |
| 0           | T8    | B05      | 0     | 0          | kleiner LLOQ | #VALUE! | 1               | #VALUE! |
| 0           | T8    | B06      | 0.000 | -0.051     | kleiner LLOQ | #VALUE! | 1               | #VALUE! |
| 0           | T8    | B07      | 0.000 | -0.051     | kleiner LLOQ | #VALUE! | 1               | #VALUE! |
| 0           | T8    | B08      | 0.000 | -0.051     | kleiner LLOQ | #VALUE! | 1               | #VALUE! |
| 0           | T8    | B09      | 0     | 0          | kleiner LLOQ | #VALUE! | 1               | #VALUE! |
| 0           | T8    | B10      | 0     | 0          | kleiner LLOQ | #VALUE! | 1               | #VALUE! |
| 0           | T8    | B11      | 0     | 0          | kleiner LLOQ | #VALUE! | 1               | #VALUE! |
| 0           | T8    | B12      | 0     | 0          | kleiner LLOQ | #VALUE! | 1               | #VALUE! |
| 0           | T8    | C01      | 0     | 0          | kleiner LLOQ | #VALUE! | 1               | #VALUE! |
| 0           | T8    | C02      | 0     | 0          | kleiner LLOQ | #VALUE! | 1               | #VALUE! |
| 0           | T8    | C03      | 0     | 0          | kleiner LLOQ | #VALUE! | 1               | #VALUE! |
| 0           | T8    | C04      | 0     | 0          | kleiner LLOQ | #VALUE! | 1               | #VALUE! |
| 0           | T8    | C05      | 0.000 | -0.051     | kleiner LLOQ | #VALUE! | 1               | #VALUE! |
| 0           | T8    | C06      | 0.000 | -0.051     | kleiner LLOQ | #VALUE! | 1               | #VALUE! |
| 0           | T8    | C07      | 0.000 | -0.051     | kleiner LLOQ | #VALUE! | 1               | #VALUE! |
| 0           | T8    | C08      | 0.000 | -0.051     | kleiner LLOQ | #VALUE! | 1               | #VALUE! |
| 0           | T8    | C09      | 0.000 | -0.051     | kleiner LLOQ | #VALUE! | 1               | #VALUE! |
| 0           | T8    | C10      | 0.000 | -0.051     | kleiner LLOQ | #VALUE! | 1               | #VALUE! |
| 0           | T8    | C11      | 0     | 0          | kleiner LLOQ | #VALUE! | 1               | #VALUE! |
| 0           | T8    | C12      | 0     | 0          | kleiner LLOQ | #VALUE! | 1               | #VALUE! |
| 0           | T8    | D01      | 0     | 0          | kleiner LLOQ | #VALUE! | 1               | #VALUE! |
| 0           | T8    | D02      | 0     | 0          | kleiner LLOQ | #VALUE! | 1               | #VALUE! |
| 0           | T8    | D03      | 0     | 0          | kleiner LLOQ | #VALUE! | 1               | #VALUE! |
| 0           | T8    | D04      | 0     | 0          | kleiner LLOQ | #VALUE! | 1               | #VALUE! |
| T8SN1       | T8    | D05      | 0     | 0          | kleiner LLOQ | #VALUE! | 1               | #VALUE! |
| T8SN2       | T8    | D06      | 0     | 0          | kleiner LLOQ | #VALUE! | 1               | #VALUE! |
| T8SN2       | T8    | D07      | 0     | 0          | kleiner LLOQ | #VALUE! | 1               | #VALUE! |
| T8SN2       | T8    | D08      | 0     | 0          | kleiner LLOQ | #VALUE! | 1               | #VALUE! |
| T8SN3       | T8    | D09      | 0     | 0          | kleiner LLOQ | #VALUE! | 1               | #VALUE! |
| T8SN3       | T8    | D10      | 0     | 0          | kleiner LLOQ | #VALUE! | 1               | #VALUE! |
| T8SN4       | T8    | D11      | 0     | 0          | kleiner LLOQ | #VALUE! | 1               | #VALUE! |
| T8SN4       | T8    | D12      | 0     | 0          | kleiner LLOQ | #VALUE! | 1               | #VALUE! |

Plate: T8

|   |   |   |   |   |   |   |   |   |   |    |    |    |
|---|---|---|---|---|---|---|---|---|---|----|----|----|
|   | 1 | 2 | 3 | 4 | 5 | 6 | 7 | 8 | 9 | 10 | 11 | 12 |
| A |   |   |   |   |   |   |   |   |   |    |    |    |
| B |   |   |   |   |   |   |   |   |   |    |    |    |
| C |   |   |   |   |   |   |   |   |   |    |    |    |
| D |   |   |   |   |   |   |   |   |   |    |    |    |
| E |   |   |   |   |   |   |   |   |   |    |    |    |
| F |   |   |   |   |   |   |   |   |   |    |    |    |
| G |   |   |   |   |   |   |   |   |   |    |    |    |
| H |   |   |   |   |   |   |   |   |   |    |    |    |

Plattenbelegung

|   |   |   |   |   |        |        |              |              |              |              |              |              |
|---|---|---|---|---|--------|--------|--------------|--------------|--------------|--------------|--------------|--------------|
|   | 1 | 2 | 3 | 4 | 5      | 6      | 7            | 8            | 9            | 10           | 11           | 12           |
| A |   |   |   |   |        |        |              |              |              |              |              |              |
| B |   |   |   |   |        |        |              |              |              |              |              |              |
| C |   |   |   |   |        |        |              |              |              |              |              |              |
| D |   |   |   |   | T8SN1  | T8SN1  | T8SN2        | T8SN2        | T8SN3        | T8SN3        | T8SN4        | T8SN4        |
| E |   |   |   |   | T8SS11 | T8SS11 | T8SS12       | T8SS12       | T8SS13       | T8SS13       | T8SS14       | T8SS14       |
| F |   |   |   |   | T8SS21 | T8SS21 | T8SS22       | T8SS22       | T8SS23       | T8SS23       | T8SS24       | T8SS24       |
| G |   |   |   |   |        |        | Blank PEG    | Blank PEG    | Blank PEG    | Blank PEG    | Blank PEG    | Blank PEG    |
| H |   |   |   |   |        |        | Blank no PEG | Blank no PEG | Blank no PEG | Blank no PEG | Blank no PEG | Blank no PEG |

Comment:  
alle Messwerte bei lin low

Samples aufgeteilt in lin high und low;niedriger konzentrierte Samples bei lin low zu finden.

Date Operator Date Control

|              |    |     |       |        |              |         |      |         |
|--------------|----|-----|-------|--------|--------------|---------|------|---------|
| 0            | T8 | E01 | 0     | 0      | kleiner LLOQ | #VALUE! | 1    | #VALUE! |
| 0            | T8 | E02 | 0     | 0      | kleiner LLOQ | #VALUE! | 1    | #VALUE! |
| 0            | T8 | E03 | 0     | 0      | kleiner LLOQ | #VALUE! | 1    | #VALUE! |
| 0            | T8 | E04 | 0     | 0      | kleiner LLOQ | #VALUE! | 1    | #VALUE! |
| T8SS11       | T8 | E05 | 0     | 0      | kleiner LLOQ | #VALUE! | 1    | #VALUE! |
| T8SS11       | T8 | E06 | 0     | 0      | kleiner LLOQ | #VALUE! | 1    | #VALUE! |
| T8SS12       | T8 | E07 | 0     | 0      | kleiner LLOQ | #VALUE! | 1    | #VALUE! |
| T8SS12       | T8 | E08 | 0     | 0      | kleiner LLOQ | #VALUE! | 1    | #VALUE! |
| T8SS13       | T8 | E09 | 0     | 0      | kleiner LLOQ | #VALUE! | 1    | #VALUE! |
| T8SS13       | T8 | E10 | 0     | 0      | kleiner LLOQ | #VALUE! | 1    | #VALUE! |
| T8SS14       | T8 | E11 | 0     | 0      | kleiner LLOQ | #VALUE! | 1    | #VALUE! |
| T8SS14       | T8 | E12 | 0     | 0      | kleiner LLOQ | #VALUE! | 1    | #VALUE! |
| 0            | T8 | F01 | 0     | 0      | kleiner LLOQ | #VALUE! | 1    | #VALUE! |
| 0            | T8 | F02 | 0     | 0      | kleiner LLOQ | #VALUE! | 1    | #VALUE! |
| 0            | T8 | F03 | 0     | 0      | kleiner LLOQ | #VALUE! | 1    | #VALUE! |
| 0            | T8 | F04 | 0     | 0      | kleiner LLOQ | #VALUE! | 1    | #VALUE! |
| T8SS21       | T8 | F05 | 0     | 0      | kleiner LLOQ | #VALUE! | 1    | #VALUE! |
| T8SS21       | T8 | F06 | 0     | 0      | kleiner LLOQ | #VALUE! | 1    | #VALUE! |
| T8SS22       | T8 | F07 | 0     | 0      | kleiner LLOQ | #VALUE! | 1    | #VALUE! |
| T8SS22       | T8 | F08 | 0     | 0      | kleiner LLOQ | #VALUE! | 1    | #VALUE! |
| T8SS23       | T8 | F09 | 0     | 0      | kleiner LLOQ | #VALUE! | 1    | #VALUE! |
| T8SS23       | T8 | F10 | 0     | 0      | kleiner LLOQ | #VALUE! | 1    | #VALUE! |
| T8SS24       | T8 | F11 | 0     | 0      | kleiner LLOQ | #VALUE! | 1    | #VALUE! |
| T8SS24       | T8 | F12 | 0     | 0      | kleiner LLOQ | #VALUE! | 1    | #VALUE! |
| 0            | T8 | G01 | 0     | 0      | kleiner LLOQ | #VALUE! | 1    | #VALUE! |
| 0            | T8 | G02 | 0     | 0      | kleiner LLOQ | #VALUE! | 1    | #VALUE! |
| 0            | T8 | G03 | 0     | 0      | kleiner LLOQ | #VALUE! | 1    | #VALUE! |
| 0            | T8 | G04 | 0     | 0      | kleiner LLOQ | #VALUE! | 1    | #VALUE! |
| 0            | T8 | G05 | 0     | 0      | kleiner LLOQ | #VALUE! | 1    | #VALUE! |
| 0            | T8 | G06 | 0     | 0      | kleiner LLOQ | #VALUE! | 1    | #VALUE! |
| Blank PEG    | T8 | G07 | 0.000 | -0.051 | kleiner LLOQ | #VALUE! | 2.75 | #VALUE! |
| Blank PEG    | T8 | G08 | 0.000 | -0.051 | kleiner LLOQ | #VALUE! | 2.75 | #VALUE! |
| Blank PEG    | T8 | G09 | 0.000 | -0.051 | kleiner LLOQ | #VALUE! | 2.75 | #VALUE! |
| Blank PEG    | T8 | G10 | 0.000 | -0.051 | kleiner LLOQ | #VALUE! | 2.75 | #VALUE! |
| Blank PEG    | T8 | G11 | 0.000 | -0.051 | kleiner LLOQ | #VALUE! | 2.75 | #VALUE! |
| Blank PEG    | T8 | G12 | 0.000 | -0.051 | kleiner LLOQ | #VALUE! | 2.75 | #VALUE! |
| 0            | T8 | H01 | 0     | 0      | kleiner LLOQ | #VALUE! | 1    | #VALUE! |
| 0            | T8 | H02 | 0     | 0      | kleiner LLOQ | #VALUE! | 1    | #VALUE! |
| 0            | T8 | H03 | 0     | 0      | kleiner LLOQ | #VALUE! | 1    | #VALUE! |
| 0            | T8 | H04 | 0     | 0      | kleiner LLOQ | #VALUE! | 1    | #VALUE! |
| 0            | T8 | H05 | 0     | 0      | kleiner LLOQ | #VALUE! | 1    | #VALUE! |
| 0            | T8 | H06 | 0     | 0      | kleiner LLOQ | #VALUE! | 1    | #VALUE! |
| Blank no PEG | T8 | H07 | 0.000 | -0.051 | kleiner LLOQ | #VALUE! | 2.75 | #VALUE! |
| Blank no PEG | T8 | H08 | 0.000 | -0.051 | kleiner LLOQ | #VALUE! | 2.75 | #VALUE! |
| Blank no PEG | T8 | H09 | 0.000 | -0.051 | kleiner LLOQ | #VALUE! | 2.75 | #VALUE! |
| Blank no PEG | T8 | H10 | 0.000 | -0.051 | kleiner LLOQ | #VALUE! | 2.75 | #VALUE! |
| Blank no PEG | T8 | H11 | 0.000 | -0.051 | kleiner LLOQ | #VALUE! | 2.75 | #VALUE! |
| Blank no PEG | T8 | H12 | 0.000 | -0.051 | kleiner LLOQ | #VALUE! | 2.75 | #VALUE! |

|       |    |     |   |              |         |    |         |
|-------|----|-----|---|--------------|---------|----|---------|
| 0     | T9 | A01 | 0 | kleiner LLOQ | #VALUE! | 2  | #VALUE! |
| 0     | T9 | A02 | 0 | kleiner LLOQ | #VALUE! | 3  | #VALUE! |
| 0     | T9 | A03 | 0 | kleiner LLOQ | #VALUE! | 4  | #VALUE! |
| 0     | T9 | A04 | 0 | kleiner LLOQ | #VALUE! | 5  | #VALUE! |
| 0     | T9 | A05 | 0 | kleiner LLOQ | #VALUE! | 6  | #VALUE! |
| 0     | T9 | A06 | 0 | kleiner LLOQ | #VALUE! | 7  | #VALUE! |
| 0     | T9 | A07 | 0 | kleiner LLOQ | #VALUE! | 8  | #VALUE! |
| 0     | T9 | A08 | 0 | kleiner LLOQ | #VALUE! | 9  | #VALUE! |
| 0     | T9 | A09 | 0 | kleiner LLOQ | #VALUE! | 10 | #VALUE! |
| 0     | T9 | A10 | 0 | kleiner LLOQ | #VALUE! | 11 | #VALUE! |
| 0     | T9 | A11 | 0 | kleiner LLOQ | #VALUE! | 12 | #VALUE! |
| 0     | T9 | A12 | 0 | kleiner LLOQ | #VALUE! | 13 | #VALUE! |
| 0     | T9 | B01 | 0 | kleiner LLOQ | #VALUE! | 14 | #VALUE! |
| 0     | T9 | B02 | 0 | kleiner LLOQ | #VALUE! | 15 | #VALUE! |
| 0     | T9 | B03 | 0 | kleiner LLOQ | #VALUE! | 16 | #VALUE! |
| 0     | T9 | B04 | 0 | kleiner LLOQ | #VALUE! | 17 | #VALUE! |
| 0     | T9 | B05 | 0 | kleiner LLOQ | #VALUE! | 18 | #VALUE! |
| 0     | T9 | B06 | 0 | kleiner LLOQ | #VALUE! | 19 | #VALUE! |
| 0     | T9 | B07 | 0 | kleiner LLOQ | #VALUE! | 20 | #VALUE! |
| 0     | T9 | B08 | 0 | kleiner LLOQ | #VALUE! | 21 | #VALUE! |
| 0     | T9 | B09 | 0 | kleiner LLOQ | #VALUE! | 22 | #VALUE! |
| 0     | T9 | B10 | 0 | kleiner LLOQ | #VALUE! | 23 | #VALUE! |
| 0     | T9 | B11 | 0 | kleiner LLOQ | #VALUE! | 24 | #VALUE! |
| 0     | T9 | B12 | 0 | kleiner LLOQ | #VALUE! | 25 | #VALUE! |
| 0     | T9 | C01 | 0 | kleiner LLOQ | #VALUE! | 26 | #VALUE! |
| 0     | T9 | C02 | 0 | kleiner LLOQ | #VALUE! | 27 | #VALUE! |
| 0     | T9 | C03 | 0 | kleiner LLOQ | #VALUE! | 28 | #VALUE! |
| 0     | T9 | C04 | 0 | kleiner LLOQ | #VALUE! | 29 | #VALUE! |
| 0     | T9 | C05 | 0 | kleiner LLOQ | #VALUE! | 30 | #VALUE! |
| 0     | T9 | C06 | 0 | kleiner LLOQ | #VALUE! | 31 | #VALUE! |
| 0     | T9 | C07 | 0 | kleiner LLOQ | #VALUE! | 32 | #VALUE! |
| 0     | T9 | C08 | 0 | kleiner LLOQ | #VALUE! | 33 | #VALUE! |
| 0     | T9 | C09 | 0 | kleiner LLOQ | #VALUE! | 34 | #VALUE! |
| 0     | T9 | C10 | 0 | kleiner LLOQ | #VALUE! | 35 | #VALUE! |
| 0     | T9 | C11 | 0 | kleiner LLOQ | #VALUE! | 36 | #VALUE! |
| 0     | T9 | C12 | 0 | kleiner LLOQ | #VALUE! | 37 | #VALUE! |
| 0     | T9 | D01 | 0 | kleiner LLOQ | #VALUE! | 38 | #VALUE! |
| 0     | T9 | D02 | 0 | kleiner LLOQ | #VALUE! | 39 | #VALUE! |
| 0     | T9 | D03 | 0 | kleiner LLOQ | #VALUE! | 40 | #VALUE! |
| 0     | T9 | D04 | 0 | kleiner LLOQ | #VALUE! | 41 | #VALUE! |
| 0     | T9 | D05 | 0 | kleiner LLOQ | #VALUE! | 42 | #VALUE! |
| 0     | T9 | D06 | 0 | kleiner LLOQ | #VALUE! | 43 | #VALUE! |
| T9SN2 | T9 | D07 | 0 | kleiner LLOQ | #VALUE! | 44 | #VALUE! |
| T9SN2 | T9 | D08 | 0 | kleiner LLOQ | #VALUE! | 45 | #VALUE! |
| T9SN3 | T9 | D09 | 0 | kleiner LLOQ | #VALUE! | 46 | #VALUE! |
| T9SN3 | T9 | D10 | 0 | kleiner LLOQ | #VALUE! | 47 | #VALUE! |
| T9SN4 | T9 | D11 | 0 | kleiner LLOQ | #VALUE! | 48 | #VALUE! |
| T9SN4 | T9 | D12 | 0 | kleiner LLOQ | #VALUE! | 49 | #VALUE! |

Plate: T9

|   |   |   |   |   |   |   |   |   |   |    |    |    |
|---|---|---|---|---|---|---|---|---|---|----|----|----|
|   | 1 | 2 | 3 | 4 | 5 | 6 | 7 | 8 | 9 | 10 | 11 | 12 |
| A |   |   |   |   |   |   |   |   |   |    |    |    |
| B |   |   |   |   |   |   |   |   |   |    |    |    |
| C |   |   |   |   |   |   |   |   |   |    |    |    |
| D |   |   |   |   |   |   |   |   |   |    |    |    |
| E |   |   |   |   |   |   |   |   |   |    |    |    |
| F |   |   |   |   |   |   |   |   |   |    |    |    |
| G |   |   |   |   |   |   |   |   |   |    |    |    |
| H |   |   |   |   |   |   |   |   |   |    |    |    |

Plattenbelegung

|   |   |   |   |   |        |        |              |              |              |              |              |              |
|---|---|---|---|---|--------|--------|--------------|--------------|--------------|--------------|--------------|--------------|
|   | 1 | 2 | 3 | 4 | 5      | 6      | 7            | 8            | 9            | 10           | 11           | 12           |
| A |   |   |   |   |        |        |              |              |              |              |              |              |
| B |   |   |   |   |        |        |              |              |              |              |              |              |
| C |   |   |   |   |        |        |              |              |              |              |              |              |
| D |   |   |   |   |        |        | T9SN2        | T9SN2        | T9SN3        | T9SN3        | T9SN4        | T9SN4        |
| E |   |   |   |   | T9SS11 | T9SS11 | T9SS12       | T9SS12       | T9SS13       | T9SS13       | T9SS14       | T9SS14       |
| F |   |   |   |   | T9SS21 | T9SS21 | T9SS22       | T9SS22       | T9SS23       | T9SS23       | T9SS24       | T9SS24       |
| G |   |   |   |   |        |        | Blank PEG    | Blank PEG    | Blank PEG    | Blank PEG    | Blank PEG    | Blank PEG    |
| H |   |   |   |   |        |        | Blank no PEG | Blank no PEG | Blank no PEG | Blank no PEG | Blank no PEG | Blank no PEG |

Comment:

alle Messwerte bei lin low

Date Operator

Date Control

|              |     |     |   |   |              |         |     |         |
|--------------|-----|-----|---|---|--------------|---------|-----|---------|
| 0            | T9  | E01 | 0 | 0 | kleiner LLOQ | #VALUE! | 50  | #VALUE! |
| 0            | T9  | E02 | 0 | 0 | kleiner LLOQ | #VALUE! | 51  | #VALUE! |
| 0            | T9  | E03 | 0 | 0 | kleiner LLOQ | #VALUE! | 52  | #VALUE! |
| 0            | T9  | E04 | 0 | 0 | kleiner LLOQ | #VALUE! | 53  | #VALUE! |
| T9SS11       | T9  | E05 | 0 | 0 | kleiner LLOQ | #VALUE! | 54  | #VALUE! |
| T9SS11       | T9  | E06 | 0 | 0 | kleiner LLOQ | #VALUE! | 55  | #VALUE! |
| T9SS12       | T9  | E07 | 0 | 0 | kleiner LLOQ | #VALUE! | 56  | #VALUE! |
| T9SS12       | T9  | E08 | 0 | 0 | kleiner LLOQ | #VALUE! | 57  | #VALUE! |
| T9SS13       | T9  | E09 | 0 | 0 | kleiner LLOQ | #VALUE! | 58  | #VALUE! |
| T9SS13       | T9  | E10 | 0 | 0 | kleiner LLOQ | #VALUE! | 59  | #VALUE! |
| T9SS14       | T9  | E11 | 0 | 0 | kleiner LLOQ | #VALUE! | 60  | #VALUE! |
| T9SS14       | T9  | E12 | 0 | 0 | kleiner LLOQ | #VALUE! | 61  | #VALUE! |
| 0            | T9  | F01 | 0 | 0 | kleiner LLOQ | #VALUE! | 62  | #VALUE! |
| 0            | T9  | F02 | 0 | 0 | kleiner LLOQ | #VALUE! | 63  | #VALUE! |
| 0            | T9  | F03 | 0 | 0 | kleiner LLOQ | #VALUE! | 64  | #VALUE! |
| 0            | T9  | F04 | 0 | 0 | kleiner LLOQ | #VALUE! | 65  | #VALUE! |
| T9SS21       | T9  | F05 | 0 | 0 | kleiner LLOQ | #VALUE! | 66  | #VALUE! |
| T9SS21       | T9  | F06 | 0 | 0 | kleiner LLOQ | #VALUE! | 67  | #VALUE! |
| T9SS22       | T9  | F07 | 0 | 0 | kleiner LLOQ | #VALUE! | 68  | #VALUE! |
| T9SS22       | T9  | F08 | 0 | 0 | kleiner LLOQ | #VALUE! | 69  | #VALUE! |
| T9SS23       | T9  | F09 | 0 | 0 | kleiner LLOQ | #VALUE! | 70  | #VALUE! |
| T9SS23       | T9  | F10 | 0 | 0 | kleiner LLOQ | #VALUE! | 71  | #VALUE! |
| T9SS24       | T9  | F11 | 0 | 0 | kleiner LLOQ | #VALUE! | 72  | #VALUE! |
| T9SS24       | T9  | F12 | 0 | 0 | kleiner LLOQ | #VALUE! | 73  | #VALUE! |
| 0            | T9  | G01 | 0 | 0 | kleiner LLOQ | #VALUE! | 74  | #VALUE! |
| 0            | T9  | G02 | 0 | 0 | kleiner LLOQ | #VALUE! | 75  | #VALUE! |
| 0            | T9  | G03 | 0 | 0 | kleiner LLOQ | #VALUE! | 76  | #VALUE! |
| 0            | T9  | G04 | 0 | 0 | kleiner LLOQ | #VALUE! | 77  | #VALUE! |
| 0            | T9  | G05 | 0 | 0 | kleiner LLOQ | #VALUE! | 78  | #VALUE! |
| 0            | T9  | G06 | 0 | 0 | kleiner LLOQ | #VALUE! | 79  | #VALUE! |
| Blank PEG    | T9  | G07 | 0 | 0 | kleiner LLOQ | #VALUE! | 80  | #VALUE! |
| Blank PEG    | T9  | G08 | 0 | 0 | kleiner LLOQ | #VALUE! | 81  | #VALUE! |
| Blank PEG    | T9  | G09 | 0 | 0 | kleiner LLOQ | #VALUE! | 82  | #VALUE! |
| Blank PEG    | T9  | G10 | 0 | 0 | kleiner LLOQ | #VALUE! | 83  | #VALUE! |
| Blank PEG    | T9  | G11 | 0 | 0 | kleiner LLOQ | #VALUE! | 84  | #VALUE! |
| Blank PEG    | T9  | G12 | 0 | 0 | kleiner LLOQ | #VALUE! | 85  | #VALUE! |
| 0            | T9  | H01 | 0 | 0 | kleiner LLOQ | #VALUE! | 86  | #VALUE! |
| 0            | T9  | H02 | 0 | 0 | kleiner LLOQ | #VALUE! | 87  | #VALUE! |
| 0            | T9  | H03 | 0 | 0 | kleiner LLOQ | #VALUE! | 88  | #VALUE! |
| 0            | T9  | H04 | 0 | 0 | kleiner LLOQ | #VALUE! | 89  | #VALUE! |
| 0            | T9  | H05 | 0 | 0 | kleiner LLOQ | #VALUE! | 90  | #VALUE! |
| 0            | T9  | H06 | 0 | 0 | kleiner LLOQ | #VALUE! | 91  | #VALUE! |
| Blank no PEG | T9  | H07 | 0 | 0 | kleiner LLOQ | #VALUE! | 92  | #VALUE! |
| Blank no PEG | T9  | H08 | 0 | 0 | kleiner LLOQ | #VALUE! | 93  | #VALUE! |
| Blank no PEG | T9  | H09 | 0 | 0 | kleiner LLOQ | #VALUE! | 94  | #VALUE! |
| Blank no PEG | T9  | H10 | 0 | 0 | kleiner LLOQ | #VALUE! | 95  | #VALUE! |
| Blank no PEG | T9  | H11 | 0 | 0 | kleiner LLOQ | #VALUE! | 96  | #VALUE! |
| Blank no PEG | T9  | H12 | 0 | 0 | kleiner LLOQ | #VALUE! | 97  | #VALUE! |
| 0            | T10 | A01 | 0 | 0 | kleiner LLOQ | #VALUE! | 98  | #VALUE! |
| 0            | T10 | A02 | 0 | 0 | kleiner LLOQ | #VALUE! | 99  | #VALUE! |
| 0            | T10 | A03 | 0 | 0 | kleiner LLOQ | #VALUE! | 100 | #VALUE! |
| 0            | T10 | A04 | 0 | 0 | kleiner LLOQ | #VALUE! | 101 | #VALUE! |
| 0            | T10 | A05 | 0 | 0 | kleiner LLOQ | #VALUE! | 102 | #VALUE! |
| 0            | T10 | A06 | 0 | 0 | kleiner LLOQ | #VALUE! | 103 | #VALUE! |
| 0            | T10 | A07 | 0 | 0 | kleiner LLOQ | #VALUE! | 104 | #VALUE! |
| 0            | T10 | A08 | 0 | 0 | kleiner LLOQ | #VALUE! | 105 | #VALUE! |
| 0            | T10 | A09 | 0 | 0 | kleiner LLOQ | #VALUE! | 106 | #VALUE! |
| 0            | T10 | A10 | 0 | 0 | kleiner LLOQ | #VALUE! | 107 | #VALUE! |
| 0            | T10 | A11 | 0 | 0 | kleiner LLOQ | #VALUE! | 108 | #VALUE! |
| 0            | T10 | A12 | 0 | 0 | kleiner LLOQ | #VALUE! | 109 | #VALUE! |
| 0            | T10 | B01 | 0 | 0 | kleiner LLOQ | #VALUE! | 110 | #VALUE! |
| 0            | T10 | B02 | 0 | 0 | kleiner LLOQ | #VALUE! | 111 | #VALUE! |
| 0            | T10 | B03 | 0 | 0 | kleiner LLOQ | #VALUE! | 112 | #VALUE! |
| 0            | T10 | B04 | 0 | 0 | kleiner LLOQ | #VALUE! | 113 | #VALUE! |
| 0            | T10 | B05 | 0 | 0 | kleiner LLOQ | #VALUE! | 114 | #VALUE! |
| 0            | T10 | B06 | 0 | 0 | kleiner LLOQ | #VALUE! | 115 | #VALUE! |
| 0            | T10 | B07 | 0 | 0 | kleiner LLOQ | #VALUE! | 116 | #VALUE! |
| 0            | T10 | B08 | 0 | 0 | kleiner LLOQ | #VALUE! | 117 | #VALUE! |
| 0            | T10 | B09 | 0 | 0 | kleiner LLOQ | #VALUE! | 118 | #VALUE! |
| 0            | T10 | B10 | 0 | 0 | kleiner LLOQ | #VALUE! | 119 | #VALUE! |
| 0            | T10 | B11 | 0 | 0 | kleiner LLOQ | #VALUE! | 120 | #VALUE! |
| 0            | T10 | B12 | 0 | 0 | kleiner LLOQ | #VALUE! | 121 | #VALUE! |
| 0            | T10 | C01 | 0 | 0 | kleiner LLOQ | #VALUE! | 122 | #VALUE! |
| 0            | T10 | C02 | 0 | 0 | kleiner LLOQ | #VALUE! | 123 | #VALUE! |
| 0            | T10 | C03 | 0 | 0 | kleiner LLOQ | #VALUE! | 124 | #VALUE! |

Plate: T10

|   |   |   |   |   |   |   |   |   |   |    |    |    |
|---|---|---|---|---|---|---|---|---|---|----|----|----|
|   | 1 | 2 | 3 | 4 | 5 | 6 | 7 | 8 | 9 | 10 | 11 | 12 |
| A |   |   |   |   |   |   |   |   |   |    |    |    |
| B |   |   |   |   |   |   |   |   |   |    |    |    |
| C |   |   |   |   |   |   |   |   |   |    |    |    |
| D |   |   |   |   |   |   |   |   |   |    |    |    |
| E |   |   |   |   |   |   |   |   |   |    |    |    |
| F |   |   |   |   |   |   |   |   |   |    |    |    |
| G |   |   |   |   |   |   |   |   |   |    |    |    |
| H |   |   |   |   |   |   |   |   |   |    |    |    |

Plattenbelegung

|   |   |   |   |   |         |         |           |           |           |           |           |           |
|---|---|---|---|---|---------|---------|-----------|-----------|-----------|-----------|-----------|-----------|
|   | 1 | 2 | 3 | 4 | 5       | 6       | 7         | 8         | 9         | 10        | 11        | 12        |
| A |   |   |   |   |         |         |           |           |           |           |           |           |
| B |   |   |   |   |         |         |           |           |           |           |           |           |
| C |   |   |   |   |         |         |           |           |           |           |           |           |
| D |   |   |   |   |         |         |           |           |           |           |           |           |
| E |   |   |   |   | T10SS11 | T10SS11 | T10SN2    | T10SN2    | T10SN3    | T10SN3    | T10SN4    | T10SN4    |
| F |   |   |   |   | T10SS21 | T10SS21 | T10SS22   | T10SS22   | T10SS23   | T10SS23   | T10SS24   | T10SS24   |
| G |   |   |   |   |         |         | Blank PEG | Blank PEG | Blank PEG | Blank PEG | Blank PEG | Blank PEG |





|   |     |     |   |              |         |     |         |
|---|-----|-----|---|--------------|---------|-----|---------|
| 0 | T11 | A01 | 0 | kleiner LLOQ | #VALUE! | 194 | #VALUE! |
| 0 | T11 | A02 | 0 | kleiner LLOQ | #VALUE! | 195 | #VALUE! |
| 0 | T11 | A03 | 0 | kleiner LLOQ | #VALUE! | 196 | #VALUE! |
| 0 | T11 | A04 | 0 | kleiner LLOQ | #VALUE! | 197 | #VALUE! |
| 0 | T11 | A05 | 0 | kleiner LLOQ | #VALUE! | 198 | #VALUE! |
| 0 | T11 | A06 | 0 | kleiner LLOQ | #VALUE! | 199 | #VALUE! |
| 0 | T11 | A07 | 0 | kleiner LLOQ | #VALUE! | 200 | #VALUE! |
| 0 | T11 | A08 | 0 | kleiner LLOQ | #VALUE! | 201 | #VALUE! |
| 0 | T11 | A09 | 0 | kleiner LLOQ | #VALUE! | 202 | #VALUE! |
| 0 | T11 | A10 | 0 | kleiner LLOQ | #VALUE! | 203 | #VALUE! |
| 0 | T11 | A11 | 0 | kleiner LLOQ | #VALUE! | 204 | #VALUE! |
| 0 | T11 | A12 | 0 | kleiner LLOQ | #VALUE! | 205 | #VALUE! |
| 0 | T11 | B01 | 0 | kleiner LLOQ | #VALUE! | 206 | #VALUE! |
| 0 | T11 | B02 | 0 | kleiner LLOQ | #VALUE! | 207 | #VALUE! |
| 0 | T11 | B03 | 0 | kleiner LLOQ | #VALUE! | 208 | #VALUE! |
| 0 | T11 | B04 | 0 | kleiner LLOQ | #VALUE! | 209 | #VALUE! |
| 0 | T11 | B05 | 0 | kleiner LLOQ | #VALUE! | 210 | #VALUE! |
| 0 | T11 | B06 | 0 | kleiner LLOQ | #VALUE! | 211 | #VALUE! |
| 0 | T11 | B07 | 0 | kleiner LLOQ | #VALUE! | 212 | #VALUE! |
| 0 | T11 | B08 | 0 | kleiner LLOQ | #VALUE! | 213 | #VALUE! |
| 0 | T11 | B09 | 0 | kleiner LLOQ | #VALUE! | 214 | #VALUE! |
| 0 | T11 | B10 | 0 | kleiner LLOQ | #VALUE! | 215 | #VALUE! |
| 0 | T11 | B11 | 0 | kleiner LLOQ | #VALUE! | 216 | #VALUE! |
| 0 | T11 | B12 | 0 | kleiner LLOQ | #VALUE! | 217 | #VALUE! |
| 0 | T11 | C01 | 0 | kleiner LLOQ | #VALUE! | 218 | #VALUE! |
| 0 | T11 | C02 | 0 | kleiner LLOQ | #VALUE! | 219 | #VALUE! |
| 0 | T11 | C03 | 0 | kleiner LLOQ | #VALUE! | 220 | #VALUE! |
| 0 | T11 | C04 | 0 | kleiner LLOQ | #VALUE! | 221 | #VALUE! |
| 0 | T11 | C05 | 0 | kleiner LLOQ | #VALUE! | 222 | #VALUE! |
| 0 | T11 | C06 | 0 | kleiner LLOQ | #VALUE! | 223 | #VALUE! |
| 0 | T11 | C07 | 0 | kleiner LLOQ | #VALUE! | 224 | #VALUE! |
| 0 | T11 | C08 | 0 | kleiner LLOQ | #VALUE! | 225 | #VALUE! |
| 0 | T11 | C09 | 0 | kleiner LLOQ | #VALUE! | 226 | #VALUE! |
| 0 | T11 | C10 | 0 | kleiner LLOQ | #VALUE! | 227 | #VALUE! |
| 0 | T11 | C11 | 0 | kleiner LLOQ | #VALUE! | 228 | #VALUE! |
| 0 | T11 | C12 | 0 | kleiner LLOQ | #VALUE! | 229 | #VALUE! |
| 0 | T11 | D01 | 0 | kleiner LLOQ | #VALUE! | 230 | #VALUE! |
| 0 | T11 | D02 | 0 | kleiner LLOQ | #VALUE! | 231 | #VALUE! |
| 0 | T11 | D03 | 0 | kleiner LLOQ | #VALUE! | 232 | #VALUE! |
| 0 | T11 | D04 | 0 | kleiner LLOQ | #VALUE! | 233 | #VALUE! |
| 0 | T11 | D05 | 0 | kleiner LLOQ | #VALUE! | 234 | #VALUE! |
| 0 | T11 | D06 | 0 | kleiner LLOQ | #VALUE! | 235 | #VALUE! |
| 0 | T11 | D07 | 0 | kleiner LLOQ | #VALUE! | 236 | #VALUE! |
| 0 | T11 | D08 | 0 | kleiner LLOQ | #VALUE! | 237 | #VALUE! |
| 0 | T11 | D09 | 0 | kleiner LLOQ | #VALUE! | 238 | #VALUE! |
| 0 | T11 | D10 | 0 | kleiner LLOQ | #VALUE! | 239 | #VALUE! |
| 0 | T11 | D11 | 0 | kleiner LLOQ | #VALUE! | 240 | #VALUE! |
| 0 | T11 | D12 | 0 | kleiner LLOQ | #VALUE! | 241 | #VALUE! |
| 0 | T11 | E01 | 0 | kleiner LLOQ | #VALUE! | 242 | #VALUE! |
| 0 | T11 | E02 | 0 | kleiner LLOQ | #VALUE! | 243 | #VALUE! |
| 0 | T11 | E03 | 0 | kleiner LLOQ | #VALUE! | 244 | #VALUE! |
| 0 | T11 | E04 | 0 | kleiner LLOQ | #VALUE! | 245 | #VALUE! |
| 0 | T11 | E05 | 0 | kleiner LLOQ | #VALUE! | 246 | #VALUE! |
| 0 | T11 | E06 | 0 | kleiner LLOQ | #VALUE! | 247 | #VALUE! |
| 0 | T11 | E07 | 0 | kleiner LLOQ | #VALUE! | 248 | #VALUE! |
| 0 | T11 | E08 | 0 | kleiner LLOQ | #VALUE! | 249 | #VALUE! |
| 0 | T11 | E09 | 0 | kleiner LLOQ | #VALUE! | 250 | #VALUE! |

Plate: T11

|   |   |   |   |   |   |   |   |   |   |    |    |    |
|---|---|---|---|---|---|---|---|---|---|----|----|----|
|   | 1 | 2 | 3 | 4 | 5 | 6 | 7 | 8 | 9 | 10 | 11 | 12 |
| A |   |   |   |   |   |   |   |   |   |    |    |    |
| B |   |   |   |   |   |   |   |   |   |    |    |    |
| C |   |   |   |   |   |   |   |   |   |    |    |    |
| D |   |   |   |   |   |   |   |   |   |    |    |    |
| E |   |   |   |   |   |   |   |   |   |    |    |    |
| F |   |   |   |   |   |   |   |   |   |    |    |    |
| G |   |   |   |   |   |   |   |   |   |    |    |    |
| H |   |   |   |   |   |   |   |   |   |    |    |    |

Plattenbelegung

|   |   |   |   |   |         |         |              |              |              |              |              |              |        |
|---|---|---|---|---|---------|---------|--------------|--------------|--------------|--------------|--------------|--------------|--------|
|   | 1 | 2 | 3 | 4 | 5       | 6       | 7            | 8            | 9            | 10           | 11           | 12           |        |
| A |   |   |   |   |         |         |              |              |              |              |              |              |        |
| B |   |   |   |   |         |         |              |              |              |              |              |              |        |
| C |   |   |   |   |         |         |              |              |              |              |              |              |        |
| D |   |   |   |   |         |         |              | T11SN2       | T11SN2       | T11SN3       | T11SN3       | T11SN4       | T11SN4 |
| E |   |   |   |   | T11SS11 | T11SS11 | T11SS12      | T11SS12      | T11SS13      | T11SS13      | T11SS14      | T11SS14      |        |
| F |   |   |   |   | T11SS21 | T11SS21 | T11SS22      | T11SS22      | T11SS23      | T11SS23      | T11SS24      | T11SS24      |        |
| G |   |   |   |   |         |         | Blank PEG    | Blank PEG    | Blank PEG    | Blank PEG    | Blank PEG    | Blank PEG    |        |
| H |   |   |   |   |         |         | Blank no PEG | Blank no PEG | Blank no PEG | Blank no PEG | Blank no PEG | Blank no PEG |        |

Comment:

alle Messwerte bei lin low

Date Operator

Date Control

|              |     |     |   |   |              |         |     |         |
|--------------|-----|-----|---|---|--------------|---------|-----|---------|
| T11SS13      | T11 | E10 | 0 | 0 | kleiner LLOQ | #VALUE! | 251 | #VALUE! |
| T11SS14      | T11 | E11 | 0 | 0 | kleiner LLOQ | #VALUE! | 252 | #VALUE! |
| T11SS14      | T11 | E12 | 0 | 0 | kleiner LLOQ | #VALUE! | 253 | #VALUE! |
| 0            | T11 | F01 | 0 | 0 | kleiner LLOQ | #VALUE! | 254 | #VALUE! |
| 0            | T11 | F02 | 0 | 0 | kleiner LLOQ | #VALUE! | 255 | #VALUE! |
| 0            | T11 | F03 | 0 | 0 | kleiner LLOQ | #VALUE! | 256 | #VALUE! |
| 0            | T11 | F04 | 0 | 0 | kleiner LLOQ | #VALUE! | 257 | #VALUE! |
| T11SS21      | T11 | F05 | 0 | 0 | kleiner LLOQ | #VALUE! | 258 | #VALUE! |
| T11SS21      | T11 | F06 | 0 | 0 | kleiner LLOQ | #VALUE! | 259 | #VALUE! |
| T11SS22      | T11 | F07 | 0 | 0 | kleiner LLOQ | #VALUE! | 260 | #VALUE! |
| T11SS22      | T11 | F08 | 0 | 0 | kleiner LLOQ | #VALUE! | 261 | #VALUE! |
| T11SS23      | T11 | F09 | 0 | 0 | kleiner LLOQ | #VALUE! | 262 | #VALUE! |
| T11SS23      | T11 | F10 | 0 | 0 | kleiner LLOQ | #VALUE! | 263 | #VALUE! |
| T11SS24      | T11 | F11 | 0 | 0 | kleiner LLOQ | #VALUE! | 264 | #VALUE! |
| T11SS24      | T11 | F12 | 0 | 0 | kleiner LLOQ | #VALUE! | 265 | #VALUE! |
| 0            | T11 | G01 | 0 | 0 | kleiner LLOQ | #VALUE! | 266 | #VALUE! |
| 0            | T11 | G02 | 0 | 0 | kleiner LLOQ | #VALUE! | 267 | #VALUE! |
| 0            | T11 | G03 | 0 | 0 | kleiner LLOQ | #VALUE! | 268 | #VALUE! |
| 0            | T11 | G04 | 0 | 0 | kleiner LLOQ | #VALUE! | 269 | #VALUE! |
| 0            | T11 | G05 | 0 | 0 | kleiner LLOQ | #VALUE! | 270 | #VALUE! |
| 0            | T11 | G06 | 0 | 0 | kleiner LLOQ | #VALUE! | 271 | #VALUE! |
| Blank PEG    | T11 | G07 | 0 | 0 | kleiner LLOQ | #VALUE! | 272 | #VALUE! |
| Blank PEG    | T11 | G08 | 0 | 0 | kleiner LLOQ | #VALUE! | 273 | #VALUE! |
| Blank PEG    | T11 | G09 | 0 | 0 | kleiner LLOQ | #VALUE! | 274 | #VALUE! |
| Blank PEG    | T11 | G10 | 0 | 0 | kleiner LLOQ | #VALUE! | 275 | #VALUE! |
| Blank PEG    | T11 | G11 | 0 | 0 | kleiner LLOQ | #VALUE! | 276 | #VALUE! |
| Blank PEG    | T11 | G12 | 0 | 0 | kleiner LLOQ | #VALUE! | 277 | #VALUE! |
| 0            | T11 | H01 | 0 | 0 | kleiner LLOQ | #VALUE! | 278 | #VALUE! |
| 0            | T11 | H02 | 0 | 0 | kleiner LLOQ | #VALUE! | 279 | #VALUE! |
| 0            | T11 | H03 | 0 | 0 | kleiner LLOQ | #VALUE! | 280 | #VALUE! |
| 0            | T11 | H04 | 0 | 0 | kleiner LLOQ | #VALUE! | 281 | #VALUE! |
| 0            | T11 | H05 | 0 | 0 | kleiner LLOQ | #VALUE! | 282 | #VALUE! |
| 0            | T11 | H06 | 0 | 0 | kleiner LLOQ | #VALUE! | 283 | #VALUE! |
| Blank no PEG | T11 | H07 | 0 | 0 | kleiner LLOQ | #VALUE! | 284 | #VALUE! |
| Blank no PEG | T11 | H08 | 0 | 0 | kleiner LLOQ | #VALUE! | 285 | #VALUE! |
| Blank no PEG | T11 | H09 | 0 | 0 | kleiner LLOQ | #VALUE! | 286 | #VALUE! |
| Blank no PEG | T11 | H10 | 0 | 0 | kleiner LLOQ | #VALUE! | 287 | #VALUE! |
| Blank no PEG | T11 | H11 | 0 | 0 | kleiner LLOQ | #VALUE! | 288 | #VALUE! |
| Blank no PEG | T11 | H12 | 0 | 0 | kleiner LLOQ | #VALUE! | 289 | #VALUE! |

|       |       |       |       |       |       |       |       |       |       |       |       |
|-------|-------|-------|-------|-------|-------|-------|-------|-------|-------|-------|-------|
| 1.447 | 1.739 |       | 1.170 |       |       |       |       |       | 0.667 | 0.440 | 0.043 |
| 1.447 | 1.332 |       | 1.392 | 0.137 | 0.146 | 0.130 | 0.138 | 0.109 | 0.729 | 0.478 | 0.042 |
| 1.391 | 1.281 |       | 1.311 | 0.204 | 0.184 | 0.184 | 0.198 | 0.201 | 0.743 | 0.474 | 0.043 |
| 0.961 | 0.835 |       | 1.405 | 0.336 | 0.347 | 0.375 | 0.387 | 0.300 | 0.824 | 0.483 | 0.044 |
| 0.445 | 0.441 |       | 1.280 | 1.085 | 1.086 | 1.218 | 1.004 | 0.873 | 0.704 | 0.457 | 0.041 |
| 0.355 | 0.315 |       | 1.332 | 1.768 | 1.925 | 1.753 | 1.739 | 1.606 |       |       | 0.036 |
| 0.223 | 0.188 | 1.666 | 1.499 | 1.632 |       | 0.048 | 0.046 | 0.047 | 0.048 | 0.048 | 0.048 |
| 0.118 | 0.106 | 1.556 | 1.622 | 1.573 |       | 0.047 | 0.054 | 0.051 | 0.051 | 0.052 | 0.051 |

1

|       |       |       |       |       |       |       |       |       |       |       |       |
|-------|-------|-------|-------|-------|-------|-------|-------|-------|-------|-------|-------|
| 1.652 | 1.627 |       | 1.188 | 0.748 | 0.811 | 0.764 | 0.753 | 0.674 | 0.751 | 0.529 | 0.044 |
| 1.443 | 1.372 |       | 1.364 | 0.139 | 0.147 | 0.131 | 0.139 | 0.110 | 0.811 | 0.561 | 0.043 |
| 1.377 | 1.281 |       | 1.284 | 0.206 | 0.189 | 0.184 | 0.200 | 0.202 | 0.821 | 0.560 | 0.044 |
| 0.972 | 0.883 |       | 1.387 | 0.339 | 0.349 | 0.386 | 0.406 | 0.312 | 0.903 | 0.565 | 0.044 |
| 0.484 | 0.474 |       | 1.298 | 1.087 | 1.113 | 1.203 | 1.022 | 0.903 | 0.790 | 0.544 | 0.042 |
| 0.359 | 0.326 |       | 1.308 | 1.622 | 1.622 | 1.630 | 1.625 | 1.550 |       |       | 0.037 |
| 0.228 | 0.199 | 1.527 | 1.373 | 1.462 |       | 0.048 | 0.046 | 0.048 | 0.049 | 0.049 | 0.049 |
| 0.125 | 0.109 | 1.473 | 1.410 | 1.371 |       | 0.048 | 0.054 | 0.052 | 0.052 | 0.052 | 0.051 |

2

|       |       |       |       |       |       |       |       |       |       |       |       |
|-------|-------|-------|-------|-------|-------|-------|-------|-------|-------|-------|-------|
| 1.579 | 1.475 |       | 1.150 | 1.210 | 1.303 | 1.202 | 1.219 | 1.125 | 0.759 | 0.549 | 0.043 |
| 1.357 | 1.303 |       | 1.283 | 0.140 | 0.148 | 0.131 | 0.139 | 0.111 | 0.820 | 0.575 | 0.043 |
| 1.323 | 1.228 |       | 1.227 | 0.206 | 0.188 | 0.184 | 0.198 | 0.201 | 0.824 | 0.579 | 0.043 |
| 0.959 | 0.872 |       | 1.321 | 0.339 | 0.348 | 0.387 | 0.406 | 0.314 | 0.909 | 0.580 | 0.044 |
| 0.483 | 0.473 |       | 1.270 | 1.069 | 1.103 | 1.181 | 1.017 | 0.903 | 0.798 | 0.560 | 0.042 |
| 0.360 | 0.326 |       | 1.270 | 1.497 | 1.448 | 1.496 | 1.494 | 1.449 |       |       | 0.037 |
| 0.228 | 0.199 | 1.374 | 1.262 | 1.314 |       | 0.048 | 0.046 | 0.048 | 0.049 | 0.049 | 0.049 |
| 0.125 | 0.110 | 1.346 | 1.262 | 1.253 |       | 0.048 | 0.054 | 0.052 | 0.052 | 0.052 | 0.051 |

3

|       |       |  |  |       |       |       |       |       |       |       |       |
|-------|-------|--|--|-------|-------|-------|-------|-------|-------|-------|-------|
| 1.511 | 1.369 |  |  | 1.538 | 1.712 | 1.528 | 1.502 | 1.425 |       |       | 0.043 |
| 1.296 | 1.261 |  |  |       |       |       |       |       |       |       | 0.043 |
| 1.272 | 1.193 |  |  |       |       |       |       |       |       |       | 0.043 |
| 0.947 | 0.859 |  |  |       |       |       |       |       |       |       | 0.044 |
| 0.481 | 0.471 |  |  |       |       |       |       |       |       |       | 0.042 |
| 0.361 | 0.325 |  |  |       |       |       |       |       |       |       | 0.037 |
| 0.229 | 0.199 |  |  |       |       | 0.048 | 0.046 | 0.048 | 0.049 | 0.049 | 0.049 |
| 0.125 | 0.110 |  |  |       |       | 0.047 | 0.054 | 0.052 | 0.052 | 0.052 | 0.051 |

4

|       |       |       |       |       |       |       |       |       |       |       |       |
|-------|-------|-------|-------|-------|-------|-------|-------|-------|-------|-------|-------|
| 1.493 | 1.317 | 1.678 | 1.110 | 1.621 | 1.807 | 1.618 | 1.584 | 1.508 | 0.765 | 0.597 | 0.043 |
| 1.259 | 1.238 | 1.850 | 1.197 | 0.139 | 0.150 | 0.132 | 0.139 | 0.111 | 0.821 | 0.588 | 0.043 |
| 1.248 | 1.175 | 1.816 | 1.153 | 0.204 | 0.188 | 0.184 | 0.197 | 0.199 | 0.831 | 0.599 | 0.044 |
| 0.943 | 0.859 | 1.970 | 1.231 | 0.338 | 0.357 | 0.386 | 0.406 | 0.316 | 0.916 | 0.595 | 0.044 |
| 0.480 | 0.470 | 2.220 | 1.220 | 1.054 | 1.088 | 1.154 | 1.006 | 0.902 | 0.805 | 0.579 | 0.042 |
| 0.359 | 0.325 | 2.149 | 1.211 | 1.395 | 1.324 | 1.348 | 1.345 | 1.317 | 0.037 | 0.037 | 0.037 |
| 0.228 | 0.199 | 1.240 | 1.151 | 1.183 | 0.034 | 0.049 | 0.046 | 0.048 | 0.049 | 0.049 | 0.049 |
| 0.125 | 0.110 | 1.223 | 1.132 | 1.146 | 0.038 | 0.048 | 0.054 | 0.052 | 0.052 | 0.052 | 0.051 |

5

|       |       |  |       |       |       |       |       |       |       |       |       |
|-------|-------|--|-------|-------|-------|-------|-------|-------|-------|-------|-------|
| 1.434 | 1.258 |  | 1.090 | 1.648 | 1.876 | 1.649 | 1.627 | 1.535 |       |       |       |
| 1.217 | 1.201 |  | 1.149 |       |       |       |       |       |       |       |       |
| 1.205 | 1.143 |  | 1.109 |       |       |       |       |       |       |       |       |
| 0.935 | 0.845 |  | 1.182 |       |       |       |       |       |       |       |       |
| 0.477 | 0.469 |  | 1.181 |       |       |       |       |       |       |       |       |
| 0.360 | 0.323 |  | 1.167 |       |       |       |       |       |       |       |       |
| 0.229 | 0.200 |  |       |       |       | 0.049 | 0.047 | 0.048 | 0.049 | 0.049 | 0.049 |
| 0.125 | 0.110 |  |       |       |       | 0.048 | 0.054 | 0.052 | 0.052 | 0.052 | 0.051 |

6

|       |       |       |       |       |       |       |       |       |       |       |       |
|-------|-------|-------|-------|-------|-------|-------|-------|-------|-------|-------|-------|
| 1.013 | 0.810 |       | 0.668 | 0.808 | 0.940 | 0.720 | 0.798 | 0.687 | 0.904 | 0.845 | 0.043 |
| 0.709 | 0.827 |       | 0.703 | 0.142 | 0.156 | 0.136 | 0.137 | 0.116 | 0.990 | 0.846 | 0.042 |
| 0.682 | 0.692 |       | 0.680 | 0.197 | 0.188 | 0.190 | 0.191 | 0.184 | 1.023 | 0.861 | 0.043 |
| 0.507 | 0.519 |       | 0.740 | 0.316 | 0.264 | 0.364 | 0.377 | 0.312 | 1.111 | 0.870 | 0.043 |
| 0.394 | 0.406 |       | 0.682 | 0.580 | 0.561 | 0.600 | 0.529 | 0.563 | 0.962 | 0.834 | 0.042 |
| 0.333 | 0.322 |       | 0.661 | 0.995 | 0.930 | 0.848 | 0.832 | 0.797 | 0.037 | 0.037 | 0.037 |
| 0.229 | 0.201 | 0.843 | 0.679 | 0.732 |       | 0.048 | 0.046 | 0.047 |       |       | 0.047 |
| 0.124 | 0.111 | 0.773 | 0.682 | 0.701 |       | 0.047 | 0.053 | 0.051 | 0.051 | 0.052 | 0.051 |

7

skin cultivation

|       |       |       |       |  |  |       |       |       |       |       |       |              |
|-------|-------|-------|-------|--|--|-------|-------|-------|-------|-------|-------|--------------|
| 0.685 | 0.649 | 0.387 | 0.342 |  |  |       |       |       |       |       |       | T8 1 hum sui |
| 0.154 | 0.141 | 0.128 | 0.091 |  |  |       |       |       |       |       |       |              |
| 0.558 | 0.521 | 0.531 | 0.224 |  |  |       |       |       |       |       |       |              |
|       | 0.277 | 0.599 | 0.442 |  |  |       |       |       |       |       |       |              |
| 0.305 | 0.254 | 0.135 | 0.201 |  |  |       |       |       |       |       |       |              |
| 0.266 | 0.234 | 0.279 | 0.262 |  |  |       |       |       |       |       |       |              |
|       |       |       |       |  |  | 0.051 | 0.054 | 0.050 | 0.052 | 0.051 | 0.051 |              |
|       |       |       |       |  |  | 0.051 | 0.051 | 0.050 | 0.050 | 0.051 | 0.050 |              |

|  |  |  |  |       |       |       |       |       |       |       |       |              |
|--|--|--|--|-------|-------|-------|-------|-------|-------|-------|-------|--------------|
|  |  |  |  | 0.635 | 0.607 | 0.628 | 0.661 | 0.404 | 0.309 | 0.229 | 0.222 | T8 2 hum sui |
|  |  |  |  | 0.460 | 0.171 | 0.156 | 0.167 | 0.129 | 0.136 | 0.081 | 0.084 |              |
|  |  |  |  | 0.458 | 0.708 | 0.553 | 0.584 | 0.670 | 0.659 | 0.222 | 0.224 |              |
|  |  |  |  |       |       | 0.262 | 0.241 | 0.621 | 0.621 | 0.449 | 0.458 |              |
|  |  |  |  | 0.260 | 0.234 | 0.197 | 0.193 | 0.128 | 0.132 | 0.204 | 0.210 |              |
|  |  |  |  | 0.245 | 0.247 | 0.151 | 0.146 | 0.271 | 0.265 | 0.268 | 0.253 |              |
|  |  |  |  |       |       | 0.053 | 0.055 | 0.053 | 0.054 | 0.053 | 0.053 |              |
|  |  |  |  |       |       | 0.053 | 0.052 | 0.051 | 0.052 | 0.052 | 0.052 |              |

|       |       |       |       |  |  |       |       |       |       |       |       |              |
|-------|-------|-------|-------|--|--|-------|-------|-------|-------|-------|-------|--------------|
| 0.488 | 0.481 | 0.313 | 0.358 |  |  |       |       |       |       |       |       | T9 1 hum sui |
| 0.137 | 0.134 | 0.176 | 0.097 |  |  |       |       |       |       |       |       |              |
| 0.473 | 0.445 | 0.459 | 0.179 |  |  |       |       |       |       |       |       |              |
|       | 0.323 | 0.536 | 0.588 |  |  |       |       |       |       |       |       |              |
| 0.374 | 0.244 | 0.122 | 0.203 |  |  |       |       |       |       |       |       |              |
| 0.333 | 0.253 | 0.304 | 0.282 |  |  |       |       |       |       |       |       |              |
|       |       |       |       |  |  | 0.049 | 0.049 | 0.049 | 0.050 | 0.049 | 0.049 |              |
|       |       |       |       |  |  | 0.050 | 0.048 | 0.048 | 0.048 | 0.047 | 0.048 |              |

|  |  |  |  |       |       |       |       |       |       |       |       |              |
|--|--|--|--|-------|-------|-------|-------|-------|-------|-------|-------|--------------|
|  |  |  |  | 0.379 | 0.370 | 0.484 | 0.478 | 0.220 | 0.291 | 0.404 | 0.398 | T9 2 hum sui |
|  |  |  |  | 0.157 | 0.155 | 0.155 | 0.157 | 0.194 | 0.200 | 0.080 | 0.091 |              |
|  |  |  |  | 0.623 | 0.633 | 0.542 | 0.548 | 0.625 | 0.640 | 0.197 | 0.192 |              |
|  |  |  |  |       |       | 0.331 | 0.343 | 0.621 | 0.661 | 0.691 | 0.644 |              |
|  |  |  |  | 0.415 | 0.405 | 0.204 | 0.207 |       |       | 0.233 | 0.231 |              |
|  |  |  |  | 0.295 | 0.327 | 0.199 | 0.193 | 0.277 | 0.307 | 0.271 | 0.291 |              |
|  |  |  |  |       |       | 0.051 | 0.051 | 0.051 | 0.051 | 0.051 | 0.050 |              |
|  |  |  |  |       |       | 0.050 | 0.049 | 0.050 | 0.049 | 0.050 | 0.050 |              |

|  |  |  |  |  |  |       |       |       |       |       |       |                             |
|--|--|--|--|--|--|-------|-------|-------|-------|-------|-------|-----------------------------|
|  |  |  |  |  |  |       |       |       |       |       |       | T9 hum sui 2 wells vergesse |
|  |  |  |  |  |  |       |       |       |       |       |       |                             |
|  |  |  |  |  |  |       |       |       |       |       |       |                             |
|  |  |  |  |  |  |       |       | 0.138 | 0.133 |       |       |                             |
|  |  |  |  |  |  |       |       |       |       |       |       |                             |
|  |  |  |  |  |  | 0.051 | 0.051 | 0.051 | 0.051 | 0.051 | 0.050 |                             |
|  |  |  |  |  |  | 0.050 | 0.049 | 0.050 | 0.050 | 0.050 | 0.050 |                             |

|       |       |       |       |  |  |       |       |       |       |       |       |               |
|-------|-------|-------|-------|--|--|-------|-------|-------|-------|-------|-------|---------------|
| 0.349 | 0.421 | 0.408 | 0.372 |  |  |       |       |       |       |       |       | T10 1 hum sui |
| 0.125 | 0.140 | 0.183 | 0.089 |  |  |       |       |       |       |       |       |               |
| 0.538 | 0.449 | 0.477 | 0.178 |  |  |       |       |       |       |       |       |               |
|       | 0.486 | 0.476 | 0.666 |  |  |       |       |       |       |       |       |               |
| 0.367 | 0.243 |       | 0.213 |  |  |       |       |       |       |       |       |               |
| 0.431 | 0.273 | 0.263 | 0.314 |  |  |       |       |       |       |       |       |               |
|       |       |       |       |  |  | 0.049 | 0.049 | 0.049 | 0.051 | 0.049 | 0.052 |               |
|       |       |       |       |  |  | 0.049 | 0.048 | 0.052 | 0.050 | 0.049 | 0.049 |               |

|  |  |  |  |       |       |       |       |       |       |       |       |               |
|--|--|--|--|-------|-------|-------|-------|-------|-------|-------|-------|---------------|
|  |  |  |  | 0.337 | 0.335 | 0.457 | 0.454 | 0.421 | 0.439 | 0.367 | 0.373 | T10 2 hum sui |
|  |  |  |  | 0.137 | 0.138 | 0.156 | 0.166 | 0.178 | 0.182 | 0.087 | 0.082 |               |
|  |  |  |  | 0.645 | 0.646 | 0.519 | 0.550 | 0.557 | 0.572 | 0.193 | 0.182 |               |
|  |  |  |  |       |       | 0.493 | 0.502 | 0.540 | 0.537 | 0.680 | 0.722 |               |
|  |  |  |  | 0.377 | 0.373 | 0.217 | 0.208 |       |       | 0.232 | 0.233 |               |
|  |  |  |  | 0.367 | 0.392 | 0.213 | 0.195 | 0.226 | 0.257 | 0.306 | 0.408 |               |

|  |  |  |  |  |  |       |       |       |       |       |       |
|--|--|--|--|--|--|-------|-------|-------|-------|-------|-------|
|  |  |  |  |  |  | 0.051 | 0.051 | 0.051 | 0.053 | 0.051 | 0.054 |
|  |  |  |  |  |  | 0.050 | 0.050 | 0.052 | 0.051 | 0.050 | 0.050 |

|       |       |       |       |  |  |       |       |       |       |       |       |               |
|-------|-------|-------|-------|--|--|-------|-------|-------|-------|-------|-------|---------------|
| 0.491 | 0.574 | 0.518 | 0.380 |  |  |       |       |       |       |       |       | T11 1 hum sui |
| 0.074 | 0.073 | 0.106 | 0.089 |  |  |       |       |       |       |       |       |               |
| 0.689 | 0.516 | 0.535 | 0.209 |  |  |       |       |       |       |       |       |               |
|       | 0.352 | 0.464 | 0.727 |  |  |       |       |       |       |       |       |               |
| 0.433 | 0.269 | 0.165 | 0.224 |  |  |       |       |       |       |       |       |               |
| 0.402 | 0.254 | 0.296 | 0.329 |  |  |       |       |       |       |       |       |               |
|       |       |       |       |  |  | 0.052 | 0.051 | 0.051 | 0.053 | 0.051 | 0.051 |               |
|       |       |       |       |  |  | 0.049 | 0.049 | 0.050 | 0.050 | 0.049 | 0.049 |               |

|  |  |  |  |       |       |       |       |       |       |       |       |               |
|--|--|--|--|-------|-------|-------|-------|-------|-------|-------|-------|---------------|
|  |  |  |  | 0.502 | 0.545 | 0.613 | 0.593 | 0.579 | 0.537 | 0.385 | 0.388 | T11 2 hum sui |
|  |  |  |  | 0.206 | 0.205 | 0.187 | 0.189 | 0.187 | 0.177 | 0.122 | 0.114 |               |
|  |  |  |  | 0.731 | 0.737 | 0.575 | 0.570 | 0.538 | 0.531 | 0.208 | 0.207 |               |
|  |  |  |  |       |       | 0.358 | 0.336 | 0.471 | 0.480 | 0.747 | 0.716 |               |
|  |  |  |  | 0.423 | 0.402 | 0.227 | 0.267 | 0.154 | 0.156 | 0.234 | 0.235 |               |
|  |  |  |  | 0.354 | 0.398 | 0.217 | 0.229 | 0.248 | 0.272 | 0.308 | 0.317 |               |
|  |  |  |  |       |       | 0.052 | 0.052 | 0.052 | 0.056 | 0.052 | 0.052 |               |
|  |  |  |  |       |       | 0.050 | 0.050 | 0.050 | 0.050 | 0.050 | 0.049 |               |

|                    |              |                              |                         |                            |                              |
|--------------------|--------------|------------------------------|-------------------------|----------------------------|------------------------------|
| Project number     | F-120        | Apparatus                    | Wallac Victor           | Operator                   | IsBa                         |
| GLP Study (Number) | n.a.         | Protocol (instrument method) | LDH test 2016           | Date of preparation        | 19-04-18                     |
| hot substance      | isotope      | n.a.                         | File name (results)     | IsBa_180419/20_LDH_full_v2 | Date of measurement          |
|                    | name         | n.a.                         | Kind of well plate      | 96 well                    | shaking time [min]           |
| cold substance     | ACB-ID       | n.a.                         | sample volume [µL]      | 100                        | stirring rate (Target) [rpm] |
|                    | Batch number | n.a.                         | Cocktail volume [µL]    | 175                        | Kind of measurement          |
|                    | name         | LDH                          | ACB-ID of cocktail      |                            | Wave length [nm]             |
|                    | ACB-ID       | L23982R                      | Matrix                  | DMEM (from powder)+PEG     | Remarks                      |
| n.a.               | Batch number | SLBK6345V                    | Blank description       | DMEM/PEG, H2O              | Remarks                      |
| n.a.               | n.a.         | n.a.                         | Pipettes (No. / volume) | 50-200µl                   | Remarks                      |
| n.a.               | n.a.         | n.a.                         | Pipettes (No. / volume) | n.a.                       | Remarks                      |

Messdaten (diese Tabelle in Bericht übernehmen)

| Sample name * | concentration (theor.) * | measured data | measured data | mean measured | SD    | RSD   | Blank * | measured data after * Blank subtraction | concentration (calc.) * | Deviation * | Residuen |
|---------------|--------------------------|---------------|---------------|---------------|-------|-------|---------|-----------------------------------------|-------------------------|-------------|----------|
|               | [µg/mL]                  | [AU]          | [AU]          | [AU]          | [AU]  | [%]   | [AU]    |                                         | [µg/mL]                 | [%]         |          |
| KLP1          |                          |               |               |               |       |       | 0.047   |                                         |                         |             |          |
| KLP2          |                          |               |               |               |       |       | 0.054   |                                         |                         |             |          |
| KLP3          |                          |               |               |               |       |       | 0.051   |                                         |                         |             |          |
| KLP4          | 0.041                    | 0.959         | 0.972         | 0.883         | 0.938 | 0.04  | 4.19    | 0.051                                   | 0.887                   | 0.041       | -0.57    |
| KLP5          | 0.018                    | 0.483         | 0.484         | 0.474         | 0.480 | 0.00  | 0.98    | 0.052                                   | 0.429                   | 0.019       | 2.42     |
| KLP6          | 0.012                    | 0.360         | 0.359         | 0.326         | 0.348 | 0.02  | 4.54    | 0.051                                   | 0.297                   | 0.013       | 5.00     |
| KLP7          | 0.007                    | 0.228         | 0.228         | 0.199         | 0.218 | 0.014 | 6.35    |                                         | 0.168                   | 0.006       | -11.29   |
| KLP8          |                          |               |               |               |       |       |         |                                         |                         |             |          |

Statistical data

|                                              |                                          |                     |              |
|----------------------------------------------|------------------------------------------|---------------------|--------------|
| Geradensteigung                              | Slope                                    | m                   | 21.03        |
| Y-Achsenabschnitt                            | Y-Intercept                              | b                   | 0.03         |
| Standardabw. Geradensteigung                 | SD-Slope                                 | S <sub>m</sub>      | 0.648055501  |
| Standardabw. Achsenabschnittes               | SD-Y-Intercept                           | S <sub>b</sub>      | 0.015177452  |
| Anzahl Messpunkte                            | number of measuring points               | n                   | 4            |
| Quadratsumme                                 | sum of squares                           | Q <sub>xx</sub>     | 0.000664046  |
| Bereichsmittle                               |                                          |                     | 0.019557193  |
| Freiheitsgrade                               | degree of freedom                        | f                   | 2            |
| Student-t-Faktor für (P = 95 %; f = n-2)     | Student-t-factor for (P = 95 %; f = n-2) | t                   | 4.303        |
| Vertrauensbereich Steig. (95 %) Obergrenze   |                                          | m + VB <sub>m</sub> | 23.81763508  |
| Vertrauensbereich Steig. (95 %) Untergrenze  |                                          | m - VB <sub>m</sub> | 18.24046944  |
| Vertrauensbereich Achsenabschnitt (95 %) Og. |                                          | b + VB <sub>b</sub> | 0.099335829  |
| Vertrauensbereich Achsenabschnitt (95 %) Ug. |                                          | b - VB <sub>b</sub> | -0.031281327 |
| Korrelationskoeffizient                      | correlation coefficient                  | r                   | 0.9991       |
| Bestimmtheitsmaß                             | determination coefficient                | r <sup>2</sup>      | 0.9981       |
| Reststandardabweichung                       |                                          | S <sub>0</sub>      | 0.01669983   |
| Summe Restquadrate                           |                                          | sd                  | 0.657385838  |
| Verfahrensstandardabw.                       |                                          | S <sub>00</sub>     | 0.000794131  |
| Rel. Verfahrensstandardabw. %                |                                          | V <sub>00</sub>     | 4.060559029  |

Berichten

|                          |       |
|--------------------------|-------|
| mean Blank               | 0     |
| SD Blank                 | 0.00  |
| RSD Blank                | 3.79  |
| x <sup>2</sup> SD (LLOQ) | 0.01  |
| x <sup>2</sup> SD (LOD)  | 0.01  |
| LLOQ (AU)                | 0.061 |
| LOD (AU)                 | 0.067 |
| ULOQ                     | 0.887 |
| LLOQ (Lin)               | 0.168 |

Evaluation / Comment

LDH linearity valid with 7 standards, split in lin high and lin low, each with 4 standards and KLP4 common standard for both. R<sup>2</sup> 0,9981, deviations for both between -13.34% and +13.04%

Date Operator Date Operator Control

Figure 1 Linearity



Figure 2 Method validation Residuen Plot

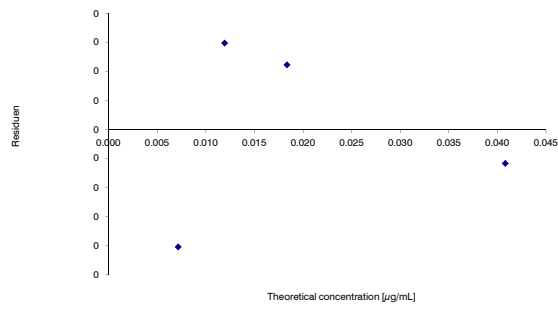

Evaluation / Comment

lin passed

Date

Operator

Date

Control



| Sample name | Plate | Position | [AU]  | [AU]-Blank | Rating       | [µg/mL] | Dilution factor | [µg/mL] |
|-------------|-------|----------|-------|------------|--------------|---------|-----------------|---------|
| 0           | T12   | A01      | 0     | 0          | kleiner LLOQ | #VALUE! | 1               | #VALUE! |
| 0           | T12   | A02      | 0     | 0          | kleiner LLOQ | #VALUE! | 1               | #VALUE! |
| 0           | T12   | A03      | 0     | 0          | kleiner LLOQ | #VALUE! | 1               | #VALUE! |
| 0           | T12   | A04      | 0     | 0          | kleiner LLOQ | #VALUE! | 1               | #VALUE! |
| 0           | T12   | A05      | 0     | 0          | kleiner LLOQ | #VALUE! | 1               | #VALUE! |
| 0           | T12   | A06      | 0     | 0          | kleiner LLOQ | #VALUE! | 1               | #VALUE! |
| 0           | T12   | A07      | 0     | 0          | kleiner LLOQ | #VALUE! | 1               | #VALUE! |
| 0           | T12   | A08      | 0     | 0          | kleiner LLOQ | #VALUE! | 1               | #VALUE! |
| 0           | T12   | A09      | 0     | 0          | kleiner LLOQ | #VALUE! | 1               | #VALUE! |
| 0           | T12   | A10      | 0     | 0          | kleiner LLOQ | #VALUE! | 1               | #VALUE! |
| 0           | T12   | A11      | 0     | 0          | kleiner LLOQ | #VALUE! | 1               | #VALUE! |
| 0           | T12   | A12      | 0     | 0          | kleiner LLOQ | #VALUE! | 1               | #VALUE! |
| 0           | T12   | B01      | 0     | 0          | kleiner LLOQ | #VALUE! | 1               | #VALUE! |
| 0           | T12   | B02      | 0     | 0          | kleiner LLOQ | #VALUE! | 1               | #VALUE! |
| 0           | T12   | B03      | 0     | 0          | kleiner LLOQ | #VALUE! | 1               | #VALUE! |
| 0           | T12   | B04      | 0     | 0          | kleiner LLOQ | #VALUE! | 1               | #VALUE! |
| 0           | T12   | B05      | 0     | 0          | kleiner LLOQ | #VALUE! | 1               | #VALUE! |
| 0           | T12   | B06      | 0     | 0          | kleiner LLOQ | #VALUE! | 1               | #VALUE! |
| 0           | T12   | B07      | 0     | 0          | kleiner LLOQ | #VALUE! | 1               | #VALUE! |
| 0           | T12   | B08      | 0     | 0          | kleiner LLOQ | #VALUE! | 1               | #VALUE! |
| 0           | T12   | B09      | 0     | 0          | kleiner LLOQ | #VALUE! | 1               | #VALUE! |
| 0           | T12   | B10      | 0     | 0          | kleiner LLOQ | #VALUE! | 1               | #VALUE! |
| 0           | T12   | B11      | 0     | 0          | kleiner LLOQ | #VALUE! | 1               | #VALUE! |
| 0           | T12   | B12      | 0     | 0          | kleiner LLOQ | #VALUE! | 1               | #VALUE! |
| 0           | T12   | C01      | 0     | 0          | kleiner LLOQ | #VALUE! | 1               | #VALUE! |
| 0           | T12   | C02      | 0     | 0          | kleiner LLOQ | #VALUE! | 1               | #VALUE! |
| 0           | T12   | C03      | 0     | 0          | kleiner LLOQ | #VALUE! | 1               | #VALUE! |
| 0           | T12   | C04      | 0     | 0          | kleiner LLOQ | #VALUE! | 1               | #VALUE! |
| 0           | T12   | C05      | 0     | 0          | kleiner LLOQ | #VALUE! | 1               | #VALUE! |
| 0           | T12   | C06      | 0     | 0          | kleiner LLOQ | #VALUE! | 1               | #VALUE! |
| 0           | T12   | C07      | 0     | 0          | kleiner LLOQ | #VALUE! | 1               | #VALUE! |
| 0           | T12   | C08      | 0     | 0          | kleiner LLOQ | #VALUE! | 1               | #VALUE! |
| 0           | T12   | C09      | 0     | 0          | kleiner LLOQ | #VALUE! | 1               | #VALUE! |
| 0           | T12   | C10      | 0     | 0          | kleiner LLOQ | #VALUE! | 1               | #VALUE! |
| 0           | T12   | C11      | 0     | 0          | kleiner LLOQ | #VALUE! | 1               | #VALUE! |
| 0           | T12   | C12      | 0     | 0          | kleiner LLOQ | #VALUE! | 1               | #VALUE! |
| 0           | T12   | D01      | 0     | 0          | kleiner LLOQ | #VALUE! | 1               | #VALUE! |
| 0           | T12   | D02      | 0     | 0          | kleiner LLOQ | #VALUE! | 1               | #VALUE! |
| 0           | T12   | D03      | 0     | 0          | kleiner LLOQ | #VALUE! | 1               | #VALUE! |
| 0           | T12   | D04      | 0     | 0          | kleiner LLOQ | #VALUE! | 1               | #VALUE! |
| 0           | T12   | D05      | 0     | 0          | kleiner LLOQ | #VALUE! | 1               | #VALUE! |
| 0           | T12   | D06      | 0     | 0          | kleiner LLOQ | #VALUE! | 1               | #VALUE! |
| T12SN2      | T12   | D07      | 0.392 | 0.341      | 0.341        | 0.015   | 2.75            | 0.040   |
| T12SN2      | T12   | D08      | 0.404 | 0.353      | 0.353        | 0.015   | 2.75            | 0.042   |
| T12SN3      | T12   | D09      | 0.444 | 0.393      | 0.393        | 0.017   | 2.75            | 0.047   |
| T12SN3      | T12   | D10      | 0.467 | 0.416      | 0.416        | 0.018   | 2.75            | 0.050   |
| T12SN4      | T12   | D11      | 0.574 | 0.523      | 0.523        | 0.023   | 2.75            | 0.064   |
| T12SN4      | T12   | D12      | 0.587 | 0.536      | 0.536        | 0.024   | 2.75            | 0.066   |

Plate: T12

| Test | Test | Test | Test | Test | Test  | Test  | Test  | Test  | Test  | Test  | Test  | Test  |
|------|------|------|------|------|-------|-------|-------|-------|-------|-------|-------|-------|
| 1    | 2    | 3    | 4    | 5    | 6     | 7     | 8     | 9     | 10    | 11    | 12    |       |
| A    |      |      |      |      |       |       |       |       |       |       |       |       |
| B    |      |      |      |      |       |       |       |       |       |       |       |       |
| C    |      |      |      |      |       |       |       |       |       |       |       |       |
| D    |      |      |      |      |       |       |       |       |       |       |       |       |
| E    |      |      |      |      | 0.636 | 0.622 | 0.342 | 0.371 | 0.439 | 0.463 | 0.228 | 0.226 |
| F    |      |      |      |      | 0.481 | 0.487 | 0.294 | 0.226 | 0.298 | 0.299 | 0.306 | 0.308 |
| G    |      |      |      |      |       |       | 0.049 | 0.049 | 0.050 | 0.049 | 0.049 | 0.049 |
| H    |      |      |      |      |       |       | 0.047 | 0.047 | 0.047 | 0.048 | 0.048 | 0.047 |

| Plattenbelegung | 1 | 2 | 3 | 4 | 5 | 6 | 7 | 8         | 9         | 10        | 11        | 12        |           |           |           |
|-----------------|---|---|---|---|---|---|---|-----------|-----------|-----------|-----------|-----------|-----------|-----------|-----------|
| A               |   |   |   |   |   |   |   |           |           |           |           |           |           |           |           |
| B               |   |   |   |   |   |   |   |           |           |           |           |           |           |           |           |
| C               |   |   |   |   |   |   |   |           |           |           |           |           |           |           |           |
| D               |   |   |   |   |   |   |   |           |           |           |           |           |           |           |           |
| E               |   |   |   |   |   |   |   | T12SN2    | T12SN2    | T12SN3    | T12SN3    | T12SN4    | T12SN4    |           |           |
| F               |   |   |   |   |   |   |   | T12SS11   | T12SS11   | T12SS12   | T12SS12   | T12SS13   | T12SS13   | T12SS14   | T12SS14   |
| G               |   |   |   |   |   |   |   | T12SS21   | T12SS21   | T12SS22   | T12SS22   | T12SS23   | T12SS23   | T12SS24   | T12SS24   |
| H               |   |   |   |   |   |   |   | Blank PEG | Blank PEG | Blank PEG | Blank PEG | Blank PEG | Blank PEG | Blank PEG | Blank PEG |

Samples aufgeteilt in lin high und low:höher konzentrierte Samples bei lin high zu finden.

Comment:  
 Erste 4 Reihen immer Testmessung zur Evaluierung der benötigten Verdünnung. Wird nicht mit ausgewertet. Unverdünte Messungen außerhalb der Linearität werden ebenfalls nicht ausgewertet. Dil.Faktor unverdünte samples=2,75 (100µl sample+100µlRM+75µl stop sol.) Verdünnung (gelb) Dil.8 Dil8\*Dil2,75=Dil.22

Date Operator

Date Control

|              |     |     |       |       |              |         |      |         |
|--------------|-----|-----|-------|-------|--------------|---------|------|---------|
| 0            | T12 | E01 | 0     | 0     | kleiner LLOQ | #VALUE! | 1    | #VALUE! |
| 0            | T12 | E02 | 0     | 0     | kleiner LLOQ | #VALUE! | 1    | #VALUE! |
| 0            | T12 | E03 | 0     | 0     | kleiner LLOQ | #VALUE! | 1    | #VALUE! |
| 0            | T12 | E04 | 0     | 0     | kleiner LLOQ | #VALUE! | 1    | #VALUE! |
| T12SS11      | T12 | E05 | 0.636 | 0.585 | 0.585        | 0.026   | 2.75 | 0.072   |
| T12SS11      | T12 | E06 | 0.622 | 0.571 | 0.571        | 0.026   | 2.75 | 0.070   |
| T12SS12      | T12 | E07 | 0.342 | 0.291 | 0.291        | 0.012   | 2.75 | 0.034   |
| T12SS12      | T12 | E08 | 0.371 | 0.320 | 0.320        | 0.014   | 2.75 | 0.037   |
| T12SS13      | T12 | E09 | 0.439 | 0.388 | 0.388        | 0.017   | 2.75 | 0.046   |
| T12SS13      | T12 | E10 | 0.463 | 0.412 | 0.412        | 0.018   | 2.75 | 0.049   |
| T12SS14      | T12 | E11 | 0.228 | 0.177 | 0.177        | 0.007   | 2.75 | 0.019   |
| T12SS14      | T12 | E12 | 0.226 | 0.175 | 0.175        | 0.007   | 2.75 | 0.018   |
| 0            | T12 | F01 | 0     | 0     | kleiner LLOQ | #VALUE! | 1    | #VALUE! |
| 0            | T12 | F02 | 0     | 0     | kleiner LLOQ | #VALUE! | 1    | #VALUE! |
| 0            | T12 | F03 | 0     | 0     | kleiner LLOQ | #VALUE! | 1    | #VALUE! |
| 0            | T12 | F04 | 0     | 0     | kleiner LLOQ | #VALUE! | 1    | #VALUE! |
| T12SS21      | T12 | F05 | 0.481 | 0.430 | 0.430        | 0.019   | 2.75 | 0.052   |
| T12SS21      | T12 | F06 | 0.487 | 0.436 | 0.436        | 0.019   | 2.75 | 0.053   |
| T12SS22      | T12 | F07 | 0.294 | 0.244 | 0.244        | 0.010   | 2.75 | 0.027   |
| T12SS22      | T12 | F08 | 0.226 | 0.175 | 0.175        | 0.007   | 2.75 | 0.018   |
| T12SS23      | T12 | F09 | 0.298 | 0.247 | 0.247        | 0.010   | 2.75 | 0.028   |
| T12SS23      | T12 | F10 | 0.299 | 0.248 | 0.248        | 0.010   | 2.75 | 0.028   |
| T12SS24      | T12 | F11 | 0.306 | 0.255 | 0.255        | 0.011   | 2.75 | 0.029   |
| T12SS24      | T12 | F12 | 0.308 | 0.257 | 0.257        | 0.011   | 2.75 | 0.029   |
| 0            | T12 | G01 | 0     | 0     | kleiner LLOQ | #VALUE! | 1    | #VALUE! |
| 0            | T12 | G02 | 0     | 0     | kleiner LLOQ | #VALUE! | 1    | #VALUE! |
| 0            | T12 | G03 | 0     | 0     | kleiner LLOQ | #VALUE! | 1    | #VALUE! |
| 0            | T12 | G04 | 0     | 0     | kleiner LLOQ | #VALUE! | 1    | #VALUE! |
| 0            | T12 | G05 | 0     | 0     | kleiner LLOQ | #VALUE! | 1    | #VALUE! |
| 0            | T12 | G06 | 0     | 0     | kleiner LLOQ | #VALUE! | 1    | #VALUE! |
| Blank PEG    | T12 | G07 | 0     | 0     | kleiner LLOQ | #VALUE! | 2.75 | #VALUE! |
| Blank PEG    | T12 | G08 | 0     | 0     | kleiner LLOQ | #VALUE! | 2.75 | #VALUE! |
| Blank PEG    | T12 | G09 | 0     | 0     | kleiner LLOQ | #VALUE! | 2.75 | #VALUE! |
| Blank PEG    | T12 | G10 | 0     | 0     | kleiner LLOQ | #VALUE! | 2.75 | #VALUE! |
| Blank PEG    | T12 | G11 | 0     | 0     | kleiner LLOQ | #VALUE! | 2.75 | #VALUE! |
| Blank PEG    | T12 | G12 | 0     | 0     | kleiner LLOQ | #VALUE! | 2.75 | #VALUE! |
| 0            | T12 | H01 | 0     | 0     | kleiner LLOQ | #VALUE! | 1    | #VALUE! |
| 0            | T12 | H02 | 0     | 0     | kleiner LLOQ | #VALUE! | 1    | #VALUE! |
| 0            | T12 | H03 | 0     | 0     | kleiner LLOQ | #VALUE! | 1    | #VALUE! |
| 0            | T12 | H04 | 0     | 0     | kleiner LLOQ | #VALUE! | 1    | #VALUE! |
| 0            | T12 | H05 | 0     | 0     | kleiner LLOQ | #VALUE! | 1    | #VALUE! |
| 0            | T12 | H06 | 0     | 0     | kleiner LLOQ | #VALUE! | 1    | #VALUE! |
| Blank no PEG | T12 | H07 | 0     | 0     | kleiner LLOQ | #VALUE! | 2.75 | #VALUE! |
| Blank no PEG | T12 | H08 | 0     | 0     | kleiner LLOQ | #VALUE! | 2.75 | #VALUE! |
| Blank no PEG | T12 | H09 | 0     | 0     | kleiner LLOQ | #VALUE! | 2.75 | #VALUE! |
| Blank no PEG | T12 | H10 | 0     | 0     | kleiner LLOQ | #VALUE! | 2.75 | #VALUE! |
| Blank no PEG | T12 | H11 | 0     | 0     | kleiner LLOQ | #VALUE! | 2.75 | #VALUE! |
| Blank no PEG | T12 | H12 | 0     | 0     | kleiner LLOQ | #VALUE! | 2.75 | #VALUE! |

|        |     |     |       |       |              |         |      |         |
|--------|-----|-----|-------|-------|--------------|---------|------|---------|
| 0      | T13 | A01 | 0     | 0     | kleiner LLOQ | #VALUE! | 1    | #VALUE! |
| 0      | T13 | A02 | 0     | 0     | kleiner LLOQ | #VALUE! | 1    | #VALUE! |
| 0      | T13 | A03 | 0     | 0     | kleiner LLOQ | #VALUE! | 1    | #VALUE! |
| 0      | T13 | A04 | 0     | 0     | kleiner LLOQ | #VALUE! | 1    | #VALUE! |
| 0      | T13 | A05 | 0     | 0     | kleiner LLOQ | #VALUE! | 1    | #VALUE! |
| 0      | T13 | A06 | 0     | 0     | kleiner LLOQ | #VALUE! | 1    | #VALUE! |
| 0      | T13 | A07 | 0     | 0     | kleiner LLOQ | #VALUE! | 1    | #VALUE! |
| 0      | T13 | A08 | 0     | 0     | kleiner LLOQ | #VALUE! | 1    | #VALUE! |
| 0      | T13 | A09 | 0     | 0     | kleiner LLOQ | #VALUE! | 1    | #VALUE! |
| 0      | T13 | A10 | 0     | 0     | kleiner LLOQ | #VALUE! | 1    | #VALUE! |
| 0      | T13 | A11 | 0     | 0     | kleiner LLOQ | #VALUE! | 1    | #VALUE! |
| 0      | T13 | A12 | 0     | 0     | kleiner LLOQ | #VALUE! | 1    | #VALUE! |
| 0      | T13 | B01 | 0     | 0     | kleiner LLOQ | #VALUE! | 1    | #VALUE! |
| 0      | T13 | B02 | 0     | 0     | kleiner LLOQ | #VALUE! | 1    | #VALUE! |
| 0      | T13 | B03 | 0     | 0     | kleiner LLOQ | #VALUE! | 1    | #VALUE! |
| 0      | T13 | B04 | 0     | 0     | kleiner LLOQ | #VALUE! | 1    | #VALUE! |
| 0      | T13 | B05 | 0     | 0     | kleiner LLOQ | #VALUE! | 1    | #VALUE! |
| 0      | T13 | B06 | 0     | 0     | kleiner LLOQ | #VALUE! | 1    | #VALUE! |
| 0      | T13 | B07 | 0     | 0     | kleiner LLOQ | #VALUE! | 1    | #VALUE! |
| 0      | T13 | B08 | 0     | 0     | kleiner LLOQ | #VALUE! | 1    | #VALUE! |
| 0      | T13 | B09 | 0     | 0     | kleiner LLOQ | #VALUE! | 1    | #VALUE! |
| 0      | T13 | B10 | 0     | 0     | kleiner LLOQ | #VALUE! | 1    | #VALUE! |
| 0      | T13 | B11 | 0     | 0     | kleiner LLOQ | #VALUE! | 1    | #VALUE! |
| 0      | T13 | B12 | 0     | 0     | kleiner LLOQ | #VALUE! | 1    | #VALUE! |
| 0      | T13 | C01 | 0     | 0     | kleiner LLOQ | #VALUE! | 1    | #VALUE! |
| 0      | T13 | C02 | 0     | 0     | kleiner LLOQ | #VALUE! | 1    | #VALUE! |
| 0      | T13 | C03 | 0     | 0     | kleiner LLOQ | #VALUE! | 1    | #VALUE! |
| 0      | T13 | C04 | 0     | 0     | kleiner LLOQ | #VALUE! | 1    | #VALUE! |
| 0      | T13 | C05 | 0     | 0     | kleiner LLOQ | #VALUE! | 1    | #VALUE! |
| 0      | T13 | C06 | 0     | 0     | kleiner LLOQ | #VALUE! | 1    | #VALUE! |
| 0      | T13 | C07 | 0     | 0     | kleiner LLOQ | #VALUE! | 1    | #VALUE! |
| 0      | T13 | C08 | 0     | 0     | kleiner LLOQ | #VALUE! | 1    | #VALUE! |
| 0      | T13 | C09 | 0     | 0     | kleiner LLOQ | #VALUE! | 1    | #VALUE! |
| 0      | T13 | C10 | 0     | 0     | kleiner LLOQ | #VALUE! | 1    | #VALUE! |
| 0      | T13 | C11 | 0     | 0     | kleiner LLOQ | #VALUE! | 1    | #VALUE! |
| 0      | T13 | C12 | 0     | 0     | kleiner LLOQ | #VALUE! | 1    | #VALUE! |
| 0      | T13 | D01 | 0     | 0     | kleiner LLOQ | #VALUE! | 1    | #VALUE! |
| 0      | T13 | D02 | 0     | 0     | kleiner LLOQ | #VALUE! | 1    | #VALUE! |
| 0      | T13 | D03 | 0     | 0     | kleiner LLOQ | #VALUE! | 1    | #VALUE! |
| 0      | T13 | D04 | 0     | 0     | kleiner LLOQ | #VALUE! | 1    | #VALUE! |
| 0      | T13 | D05 | 0     | 0     | kleiner LLOQ | #VALUE! | 1    | #VALUE! |
| 0      | T13 | D06 | 0     | 0     | kleiner LLOQ | #VALUE! | 1    | #VALUE! |
| T13SN2 | T13 | D07 | 0.554 | 0.503 | 0.503        | 0.022   | 2.75 | 0.061   |
| T13SN2 | T13 | D08 | 0.540 | 0.489 | 0.489        | 0.022   | 2.75 | 0.059   |
| T13SN3 | T13 | D09 | 0.464 | 0.413 | 0.413        | 0.018   | 2.75 | 0.050   |
| T13SN3 | T13 | D10 | 0.471 | 0.420 | 0.420        | 0.018   | 2.75 | 0.051   |
| T13SN4 | T13 | D11 | 0.680 | 0.629 | 0.629        | 0.028   | 2.75 | 0.078   |
| T13SN4 | T13 | D12 | 0.708 | 0.657 | 0.657        | 0.030   | 2.75 | 0.081   |

Plate: T13

|   |   |   |   |   |       |       |       |       |       |       |       |       |
|---|---|---|---|---|-------|-------|-------|-------|-------|-------|-------|-------|
|   | 1 | 2 | 3 | 4 | 5     | 6     | 7     | 8     | 9     | 10    | 11    | 12    |
| A |   |   |   |   |       |       |       |       |       |       |       |       |
| B |   |   |   |   |       |       |       |       |       |       |       |       |
| C |   |   |   |   |       |       |       |       |       |       |       |       |
| D |   |   |   |   |       |       | 0.554 | 0.540 | 0.464 | 0.471 | 0.680 | 0.708 |
| E |   |   |   |   | 0.472 | 0.430 | 0.233 | 0.247 | 0.137 | 0.142 | 0.228 | 0.235 |
| F |   |   |   |   | 0.320 | 0.258 | 0.191 | 0.220 | 0.250 | 0.250 | 0.294 | 0.305 |
| G |   |   |   |   |       |       | 0.050 | 0.050 | 0.053 | 0.051 | 0.051 | 0.050 |
| H |   |   |   |   |       |       | 0.048 | 0.048 | 0.048 | 0.048 | 0.048 | 0.048 |

Plattenbelegung

|   |   |   |   |   |         |         |              |              |              |              |              |              |
|---|---|---|---|---|---------|---------|--------------|--------------|--------------|--------------|--------------|--------------|
|   | 1 | 2 | 3 | 4 | 5       | 6       | 7            | 8            | 9            | 10           | 11           | 12           |
| A |   |   |   |   |         |         |              |              |              |              |              |              |
| B |   |   |   |   |         |         |              |              |              |              |              |              |
| C |   |   |   |   |         |         |              |              |              |              |              |              |
| D |   |   |   |   |         | T13SN2  | T13SN2       | T13SN3       | T13SN3       | T13SN4       | T13SN4       |              |
| E |   |   |   |   | T13SS11 | T13SS11 | T13SS12      | T13SS12      | T13SS13      | T13SS13      | T13SS14      | T13SS14      |
| F |   |   |   |   | T13SS21 | T13SS21 | T13SS22      | T13SS22      | T13SS23      | T13SS23      | T13SS24      | T13SS24      |
| G |   |   |   |   |         |         | Blank PEG    | Blank PEG    | Blank PEG    | Blank PEG    | Blank PEG    | Blank PEG    |
| H |   |   |   |   |         |         | Blank no PEG | Blank no PEG | Blank no PEG | Blank no PEG | Blank no PEG | Blank no PEG |

Comment:

Date Operator Date Control





|                    |              |                            |                         |                         |                              |
|--------------------|--------------|----------------------------|-------------------------|-------------------------|------------------------------|
| Project number     | F-120        | Apparatus                  | Wallac Victor           | Operator                | IsBa                         |
| GLP Study (Number) | n.a.         | Protocol (Instrument meth) | LDH test 2016           | Date of preparation     | 19-04-18                     |
| hot substance      | isotope      | n.a.                       | File name (results)     | IsBa_180419/20_LDH_full | Date of measurement          |
|                    | name         | n.a.                       | Kind of well plate      | 96 well                 | shaking time [min]           |
| cold substance     | ACB-ID       | n.a.                       | sample volume [µL]      | 100                     | stirring rate (Target) [rpm] |
|                    | Batch number | n.a.                       | Cocktail volume [µL]    | 175                     | Kind of measurement          |
| n.a.               | name         | LDH                        | ACB-ID of cocktail      |                         | Wave length [nm]             |
|                    | ACB-ID       | L23982R                    | Matrix                  | DMEM (from powder)+PE   | Remarks                      |
| n.a.               | Batch number | SLBK6345V                  | Blank description       | DMEM/PEG, H2O           | Remarks                      |
|                    |              |                            | Pipettes (No. / volume) | 50-200µl                | Remarks                      |
| n.a.               | n.a.         | Pipettes (No. / volume)    | n.a.                    | Remarks                 | n.a.                         |

Messdaten (diese Tabelle in Bericht übernehmen)

| Sample name * | concentration (theor.) * | measured data | measured data | measured data | mean measured | SD   | RSD  | Blank * | measured data after * | concentration (calc.) * | Deviation * | Residuen |
|---------------|--------------------------|---------------|---------------|---------------|---------------|------|------|---------|-----------------------|-------------------------|-------------|----------|
|               | [µg/mL]                  | [AU]          | [AU]          | [AU]          | [AU]          | [AU] | [%]  | [AU]    | Blank subtraction     | [µg/mL]                 | [%]         |          |
| KLP1          | 0.148                    | 1.579         | 1.652         | 1.627         | 1.62          | 0.03 | 1.87 | 0.047   | 1.568                 | 0.148                   | -0.24       | 0.00     |
| KLP2          | 0.114                    | 1.357         | 1.443         | 1.372         | 1.39          | 0.04 | 2.70 | 0.054   | 1.340                 | 0.110                   | -3.40       | 0.00     |
| KLP3          | 0.074                    | 1.272         | 1.193         | 1.228         | 1.23          | 0.03 | 2.63 | 0.051   | 1.180                 | 0.084                   | 13.04       | 0.01     |
| KLP4          | 0.041                    | 0.959         | 0.972         | 0.883         | 0.94          | 0.04 | 4.19 | 0.051   | 0.887                 | 0.035                   | -13.32      | -0.01    |
| KLP5          |                          |               |               |               |               |      |      | 0.052   |                       |                         |             |          |
| KLP6          |                          |               |               |               |               |      |      | 0.051   |                       |                         |             |          |
| KLP7          |                          |               |               |               |               |      |      |         |                       |                         |             |          |
| KLP8          |                          |               |               |               |               |      |      |         |                       |                         |             |          |

Statistical data

|                                              |                                          |                     |             |
|----------------------------------------------|------------------------------------------|---------------------|-------------|
| Geradensteigung                              | Slope                                    | m                   | 6.05        |
| Y-Achsenabschnitt                            | Y-intercept                              | b                   | 0.67        |
| Standardabw. Geradensteigung                 | SD-Slope                                 | S <sub>m</sub>      | 0.620291227 |
| Standardabw. Achsenabschnittes               | SD-Y-Intercept                           | S <sub>b</sub>      | 0.063894294 |
| Anzahl Messpunkte                            | number of measuring points               | n                   | 4           |
| Quadratsumme                                 | sum of squares                           | Q <sub>xx</sub>     | 0.006578604 |
| Bereichsmittle                               |                                          | f                   | 0.094336926 |
| Freiheitsgrade                               | degree of freedom                        | f                   | 2           |
| Student-t-Faktor für (P = 95 %; f = n-2)     | Student-t-factor for (P = 95 %; f = n-2) | t                   | 4.303       |
| Vertrauensbereich Steig. (95 %) Obergrenze   |                                          | m + VB <sub>m</sub> | 8.722319627 |
| Vertrauensbereich Steig. (95 %) Untergrenze  |                                          | m - VB <sub>m</sub> | 3.384093228 |
| Vertrauensbereich Achsenabschnitt (95 %) Og. |                                          | b + VB <sub>b</sub> | 0.946914615 |
| Vertrauensbereich Achsenabschnitt (95 %) Ug. |                                          | b - VB <sub>b</sub> | 0.398761518 |
| Korrelationskoeffizient                      | correlation coefficient                  | r                   | 0.9897      |
| Bestimmtheitsmaß                             | determination coefficient                | r <sup>2</sup>      | 0.9794      |
| Reststandardabweichung                       |                                          | S <sub>0</sub>      | 0.050310948 |
| Summe Restquadrat                            |                                          | sd                  | 2.895683345 |
| Verfahrensstandardabw.                       |                                          | S <sub>0p</sub>     | 0.008311454 |
| Rel. Verfahrensstandardabw. %                |                                          | V <sub>0p</sub>     | 8.810393374 |

|                          |       |
|--------------------------|-------|
| mean Blank               | 0     |
| SD Blank                 | 0.00  |
| RSD Blank                | 3.79  |
| x <sup>2</sup> SD (LLOQ) | 0     |
| x <sup>2</sup> SD (LOD)  | 0     |
| LLOQ (AU)                | 0     |
| LOD (AU)                 | 0     |
| LLOQ                     | 1.568 |
| LLOQ (Lin)               | 0.887 |

Evaluation / Comment

LDH linearity valid with 7 standards, split in lin high and lin low, each with 4 standards and KLP4 common standard for both. R<sup>2</sup> 0,9981, deviations for both between -13.34% and +13.04%

Date

Operator

Date

Control

Figure 1 Linearity



Figure 2 Method validation Residuen Plot

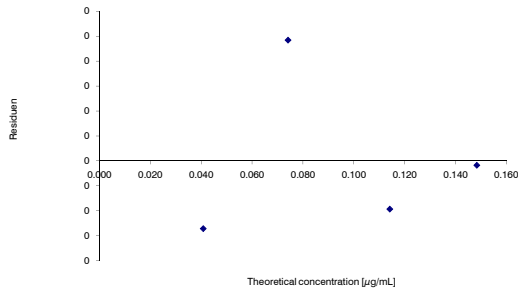

Evaluation / Comment

lin passed

Date

Operator

Date

Control

| Sample name | Plate | Position | [AU]  | [AU]-Blank | Rating       | [µg/mL] | Dilution factor | [µg/mL] |
|-------------|-------|----------|-------|------------|--------------|---------|-----------------|---------|
| 0           | T12   | A01      | 0     | 0          | kleiner LLOQ | #VALUE! | 1               | #VALUE! |
| 0           | T12   | A02      | 0     | 0          | kleiner LLOQ | #VALUE! | 1               | #VALUE! |
| 0           | T12   | A03      | 0     | 0          | kleiner LLOQ | #VALUE! | 1               | #VALUE! |
| 0           | T12   | A04      | 0     | 0          | kleiner LLOQ | #VALUE! | 1               | #VALUE! |
| 0           | T12   | A05      | 0.000 | -0.051     | kleiner LLOQ | #VALUE! | 1               | #VALUE! |
| 0           | T12   | A06      | 0.000 | -0.051     | kleiner LLOQ | #VALUE! | 1               | #VALUE! |
| 0           | T12   | A07      | 0     | 0          | kleiner LLOQ | #VALUE! | 1               | #VALUE! |
| 0           | T12   | A08      | 0     | 0          | kleiner LLOQ | #VALUE! | 1               | #VALUE! |
| 0           | T12   | A09      | 0.000 | -0.051     | kleiner LLOQ | #VALUE! | 1               | #VALUE! |
| 0           | T12   | A10      | 0.000 | -0.051     | kleiner LLOQ | #VALUE! | 1               | #VALUE! |
| 0           | T12   | A11      | 0     | 0          | kleiner LLOQ | #VALUE! | 1               | #VALUE! |
| 0           | T12   | A12      | 0     | 0          | kleiner LLOQ | #VALUE! | 1               | #VALUE! |
| 0           | T12   | B01      | 0     | 0          | kleiner LLOQ | #VALUE! | 1               | #VALUE! |
| 0           | T12   | B02      | 0     | 0          | kleiner LLOQ | #VALUE! | 1               | #VALUE! |
| 0           | T12   | B03      | 0     | 0          | kleiner LLOQ | #VALUE! | 1               | #VALUE! |
| 0           | T12   | B04      | 0     | 0          | kleiner LLOQ | #VALUE! | 1               | #VALUE! |
| 0           | T12   | B05      | 0     | 0          | kleiner LLOQ | #VALUE! | 1               | #VALUE! |
| 0           | T12   | B06      | 0.000 | -0.051     | kleiner LLOQ | #VALUE! | 1               | #VALUE! |
| 0           | T12   | B07      | 0.000 | -0.051     | kleiner LLOQ | #VALUE! | 1               | #VALUE! |
| 0           | T12   | B08      | 0.000 | -0.051     | kleiner LLOQ | #VALUE! | 1               | #VALUE! |
| 0           | T12   | B09      | 0     | 0          | kleiner LLOQ | #VALUE! | 1               | #VALUE! |
| 0           | T12   | B10      | 0     | 0          | kleiner LLOQ | #VALUE! | 1               | #VALUE! |
| 0           | T12   | B11      | 0     | 0          | kleiner LLOQ | #VALUE! | 1               | #VALUE! |
| 0           | T12   | B12      | 0     | 0          | kleiner LLOQ | #VALUE! | 1               | #VALUE! |
| 0           | T12   | C01      | 0     | 0          | kleiner LLOQ | #VALUE! | 1               | #VALUE! |
| 0           | T12   | C02      | 0     | 0          | kleiner LLOQ | #VALUE! | 1               | #VALUE! |
| 0           | T12   | C03      | 0     | 0          | kleiner LLOQ | #VALUE! | 1               | #VALUE! |
| 0           | T12   | C04      | 0     | 0          | kleiner LLOQ | #VALUE! | 1               | #VALUE! |
| 0           | T12   | C05      | 0.000 | -0.051     | kleiner LLOQ | #VALUE! | 1               | #VALUE! |
| 0           | T12   | C06      | 0.000 | -0.051     | kleiner LLOQ | #VALUE! | 1               | #VALUE! |
| 0           | T12   | C07      | 0.000 | -0.051     | kleiner LLOQ | #VALUE! | 1               | #VALUE! |
| 0           | T12   | C08      | 0.000 | -0.051     | kleiner LLOQ | #VALUE! | 1               | #VALUE! |
| 0           | T12   | C09      | 0.000 | -0.051     | kleiner LLOQ | #VALUE! | 1               | #VALUE! |
| 0           | T12   | C10      | 0.000 | -0.051     | kleiner LLOQ | #VALUE! | 1               | #VALUE! |
| 0           | T12   | C11      | 0     | 0          | kleiner LLOQ | #VALUE! | 1               | #VALUE! |
| 0           | T12   | C12      | 0     | 0          | kleiner LLOQ | #VALUE! | 1               | #VALUE! |
| 0           | T12   | D01      | 0     | 0          | kleiner LLOQ | #VALUE! | 1               | #VALUE! |
| 0           | T12   | D02      | 0     | 0          | kleiner LLOQ | #VALUE! | 1               | #VALUE! |
| 0           | T12   | D03      | 0     | 0          | kleiner LLOQ | #VALUE! | 1               | #VALUE! |
| 0           | T12   | D04      | 0     | 0          | kleiner LLOQ | #VALUE! | 1               | #VALUE! |
| 0           | T12   | D05      | 0     | 0          | kleiner LLOQ | #VALUE! | 1               | #VALUE! |
| 0           | T12   | D06      | 0     | 0          | kleiner LLOQ | #VALUE! | 1               | #VALUE! |
| T12SN2      | T12   | D07      | 0     | 0          | kleiner LLOQ | #VALUE! | 1               | #VALUE! |
| T12SN2      | T12   | D08      | 0     | 0          | kleiner LLOQ | #VALUE! | 1               | #VALUE! |
| T12SN3      | T12   | D09      | 0     | 0          | kleiner LLOQ | #VALUE! | 1               | #VALUE! |
| T12SN3      | T12   | D10      | 0     | 0          | kleiner LLOQ | #VALUE! | 1               | #VALUE! |
| T12SN4      | T12   | D11      | 0     | 0          | kleiner LLOQ | #VALUE! | 1               | #VALUE! |
| T12SN4      | T12   | D12      | 0     | 0          | kleiner LLOQ | #VALUE! | 1               | #VALUE! |

Plate: T12

|   |   |   |   |   |   |   |   |   |   |    |    |    |
|---|---|---|---|---|---|---|---|---|---|----|----|----|
|   | 1 | 2 | 3 | 4 | 5 | 6 | 7 | 8 | 9 | 10 | 11 | 12 |
| A |   |   |   |   |   |   |   |   |   |    |    |    |
| B |   |   |   |   |   |   |   |   |   |    |    |    |
| C |   |   |   |   |   |   |   |   |   |    |    |    |
| D |   |   |   |   |   |   |   |   |   |    |    |    |
| E |   |   |   |   |   |   |   |   |   |    |    |    |
| F |   |   |   |   |   |   |   |   |   |    |    |    |
| G |   |   |   |   |   |   |   |   |   |    |    |    |
| H |   |   |   |   |   |   |   |   |   |    |    |    |

Plattenbelegung

|   |   |   |   |   |   |   |   |           |           |           |           |           |           |           |           |
|---|---|---|---|---|---|---|---|-----------|-----------|-----------|-----------|-----------|-----------|-----------|-----------|
|   | 1 | 2 | 3 | 4 | 5 | 6 | 7 | 8         | 9         | 10        | 11        | 12        |           |           |           |
| A |   |   |   |   |   |   |   |           |           |           |           |           |           |           |           |
| B |   |   |   |   |   |   |   |           |           |           |           |           |           |           |           |
| C |   |   |   |   |   |   |   |           |           |           |           |           |           |           |           |
| D |   |   |   |   |   |   |   |           |           |           |           |           |           |           |           |
| E |   |   |   |   |   |   |   | T12SN2    | T12SN2    | T12SN3    | T12SN3    | T12SN4    | T12SN4    |           |           |
| F |   |   |   |   |   |   |   | T12SS11   | T12SS11   | T12SS12   | T12SS12   | T12SS13   | T12SS13   | T12SS14   | T12SS14   |
| G |   |   |   |   |   |   |   | T12SS21   | T12SS21   | T12SS22   | T12SS22   | T12SS23   | T12SS23   | T12SS24   | T12SS24   |
| H |   |   |   |   |   |   |   | Blank PEG | Blank PEG | Blank PEG | Blank PEG | Blank PEG | Blank PEG | Blank PEG | Blank PEG |

Comment:  
alle Messwerte bei lin low

Samples aufgeteilt in lin high und low;niedriger konzentrierte Samples bei lin low zu finden.

Date Operator Date Control



|              |     |     |       |        |              |         |      |         |
|--------------|-----|-----|-------|--------|--------------|---------|------|---------|
| 0            | T12 | E01 | 0     | 0      | kleiner LLOQ | #VALUE! | 1    | #VALUE! |
| 0            | T12 | E02 | 0     | 0      | kleiner LLOQ | #VALUE! | 1    | #VALUE! |
| 0            | T12 | E03 | 0     | 0      | kleiner LLOQ | #VALUE! | 1    | #VALUE! |
| 0            | T12 | E04 | 0     | 0      | kleiner LLOQ | #VALUE! | 1    | #VALUE! |
| T12SS11      | T12 | E05 | 0     | 0      | kleiner LLOQ | #VALUE! | 1    | #VALUE! |
| T12SS11      | T12 | E06 | 0     | 0      | kleiner LLOQ | #VALUE! | 1    | #VALUE! |
| T12SS12      | T12 | E07 | 0     | 0      | kleiner LLOQ | #VALUE! | 1    | #VALUE! |
| T12SS12      | T12 | E08 | 0     | 0      | kleiner LLOQ | #VALUE! | 1    | #VALUE! |
| T12SS13      | T12 | E09 | 0     | 0      | kleiner LLOQ | #VALUE! | 1    | #VALUE! |
| T12SS13      | T12 | E10 | 0     | 0      | kleiner LLOQ | #VALUE! | 1    | #VALUE! |
| T12SS14      | T12 | E11 | 0     | 0      | kleiner LLOQ | #VALUE! | 1    | #VALUE! |
| T12SS14      | T12 | E12 | 0     | 0      | kleiner LLOQ | #VALUE! | 1    | #VALUE! |
| 0            | T12 | F01 | 0     | 0      | kleiner LLOQ | #VALUE! | 1    | #VALUE! |
| 0            | T12 | F02 | 0     | 0      | kleiner LLOQ | #VALUE! | 1    | #VALUE! |
| 0            | T12 | F03 | 0     | 0      | kleiner LLOQ | #VALUE! | 1    | #VALUE! |
| 0            | T12 | F04 | 0     | 0      | kleiner LLOQ | #VALUE! | 1    | #VALUE! |
| T12SS21      | T12 | F05 | 0     | 0      | kleiner LLOQ | #VALUE! | 1    | #VALUE! |
| T12SS21      | T12 | F06 | 0     | 0      | kleiner LLOQ | #VALUE! | 1    | #VALUE! |
| T12SS22      | T12 | F07 | 0     | 0      | kleiner LLOQ | #VALUE! | 1    | #VALUE! |
| T12SS22      | T12 | F08 | 0     | 0      | kleiner LLOQ | #VALUE! | 1    | #VALUE! |
| T12SS23      | T12 | F09 | 0     | 0      | kleiner LLOQ | #VALUE! | 1    | #VALUE! |
| T12SS23      | T12 | F10 | 0     | 0      | kleiner LLOQ | #VALUE! | 1    | #VALUE! |
| T12SS24      | T12 | F11 | 0     | 0      | kleiner LLOQ | #VALUE! | 1    | #VALUE! |
| T12SS24      | T12 | F12 | 0     | 0      | kleiner LLOQ | #VALUE! | 1    | #VALUE! |
| 0            | T12 | G01 | 0     | 0      | kleiner LLOQ | #VALUE! | 1    | #VALUE! |
| 0            | T12 | G02 | 0     | 0      | kleiner LLOQ | #VALUE! | 1    | #VALUE! |
| 0            | T12 | G03 | 0     | 0      | kleiner LLOQ | #VALUE! | 1    | #VALUE! |
| 0            | T12 | G04 | 0     | 0      | kleiner LLOQ | #VALUE! | 1    | #VALUE! |
| 0            | T12 | G05 | 0     | 0      | kleiner LLOQ | #VALUE! | 1    | #VALUE! |
| 0            | T12 | G06 | 0     | 0      | kleiner LLOQ | #VALUE! | 1    | #VALUE! |
| Blank PEG    | T12 | G07 | 0.000 | -0.051 | kleiner LLOQ | #VALUE! | 2.75 | #VALUE! |
| Blank PEG    | T12 | G08 | 0.000 | -0.051 | kleiner LLOQ | #VALUE! | 2.75 | #VALUE! |
| Blank PEG    | T12 | G09 | 0.000 | -0.051 | kleiner LLOQ | #VALUE! | 2.75 | #VALUE! |
| Blank PEG    | T12 | G10 | 0.000 | -0.051 | kleiner LLOQ | #VALUE! | 2.75 | #VALUE! |
| Blank PEG    | T12 | G11 | 0.000 | -0.051 | kleiner LLOQ | #VALUE! | 2.75 | #VALUE! |
| Blank PEG    | T12 | G12 | 0.000 | -0.051 | kleiner LLOQ | #VALUE! | 2.75 | #VALUE! |
| 0            | T12 | H01 | 0     | 0      | kleiner LLOQ | #VALUE! | 1    | #VALUE! |
| 0            | T12 | H02 | 0     | 0      | kleiner LLOQ | #VALUE! | 1    | #VALUE! |
| 0            | T12 | H03 | 0     | 0      | kleiner LLOQ | #VALUE! | 1    | #VALUE! |
| 0            | T12 | H04 | 0     | 0      | kleiner LLOQ | #VALUE! | 1    | #VALUE! |
| 0            | T12 | H05 | 0     | 0      | kleiner LLOQ | #VALUE! | 1    | #VALUE! |
| 0            | T12 | H06 | 0     | 0      | kleiner LLOQ | #VALUE! | 1    | #VALUE! |
| Blank no PEG | T12 | H07 | 0.000 | -0.051 | kleiner LLOQ | #VALUE! | 2.75 | #VALUE! |
| Blank no PEG | T12 | H08 | 0.000 | -0.051 | kleiner LLOQ | #VALUE! | 2.75 | #VALUE! |
| Blank no PEG | T12 | H09 | 0.000 | -0.051 | kleiner LLOQ | #VALUE! | 2.75 | #VALUE! |
| Blank no PEG | T12 | H10 | 0.000 | -0.051 | kleiner LLOQ | #VALUE! | 2.75 | #VALUE! |
| Blank no PEG | T12 | H11 | 0.000 | -0.051 | kleiner LLOQ | #VALUE! | 2.75 | #VALUE! |
| Blank no PEG | T12 | H12 | 0.000 | -0.051 | kleiner LLOQ | #VALUE! | 2.75 | #VALUE! |

|        |     |     |   |              |         |   |         |
|--------|-----|-----|---|--------------|---------|---|---------|
| 0      | T13 | A01 | 0 | kleiner LLOQ | #VALUE! | 1 | #VALUE! |
| 0      | T13 | A02 | 0 | kleiner LLOQ | #VALUE! | 1 | #VALUE! |
| 0      | T13 | A03 | 0 | kleiner LLOQ | #VALUE! | 1 | #VALUE! |
| 0      | T13 | A04 | 0 | kleiner LLOQ | #VALUE! | 1 | #VALUE! |
| 0      | T13 | A05 | 0 | kleiner LLOQ | #VALUE! | 1 | #VALUE! |
| 0      | T13 | A06 | 0 | kleiner LLOQ | #VALUE! | 1 | #VALUE! |
| 0      | T13 | A07 | 0 | kleiner LLOQ | #VALUE! | 1 | #VALUE! |
| 0      | T13 | A08 | 0 | kleiner LLOQ | #VALUE! | 1 | #VALUE! |
| 0      | T13 | A09 | 0 | kleiner LLOQ | #VALUE! | 1 | #VALUE! |
| 0      | T13 | A10 | 0 | kleiner LLOQ | #VALUE! | 1 | #VALUE! |
| 0      | T13 | A11 | 0 | kleiner LLOQ | #VALUE! | 1 | #VALUE! |
| 0      | T13 | A12 | 0 | kleiner LLOQ | #VALUE! | 1 | #VALUE! |
| 0      | T13 | B01 | 0 | kleiner LLOQ | #VALUE! | 1 | #VALUE! |
| 0      | T13 | B02 | 0 | kleiner LLOQ | #VALUE! | 1 | #VALUE! |
| 0      | T13 | B03 | 0 | kleiner LLOQ | #VALUE! | 1 | #VALUE! |
| 0      | T13 | B04 | 0 | kleiner LLOQ | #VALUE! | 1 | #VALUE! |
| 0      | T13 | B05 | 0 | kleiner LLOQ | #VALUE! | 1 | #VALUE! |
| 0      | T13 | B06 | 0 | kleiner LLOQ | #VALUE! | 1 | #VALUE! |
| 0      | T13 | B07 | 0 | kleiner LLOQ | #VALUE! | 1 | #VALUE! |
| 0      | T13 | B08 | 0 | kleiner LLOQ | #VALUE! | 1 | #VALUE! |
| 0      | T13 | B09 | 0 | kleiner LLOQ | #VALUE! | 1 | #VALUE! |
| 0      | T13 | B10 | 0 | kleiner LLOQ | #VALUE! | 1 | #VALUE! |
| 0      | T13 | B11 | 0 | kleiner LLOQ | #VALUE! | 1 | #VALUE! |
| 0      | T13 | B12 | 0 | kleiner LLOQ | #VALUE! | 1 | #VALUE! |
| 0      | T13 | C01 | 0 | kleiner LLOQ | #VALUE! | 1 | #VALUE! |
| 0      | T13 | C02 | 0 | kleiner LLOQ | #VALUE! | 1 | #VALUE! |
| 0      | T13 | C03 | 0 | kleiner LLOQ | #VALUE! | 1 | #VALUE! |
| 0      | T13 | C04 | 0 | kleiner LLOQ | #VALUE! | 1 | #VALUE! |
| 0      | T13 | C05 | 0 | kleiner LLOQ | #VALUE! | 1 | #VALUE! |
| 0      | T13 | C06 | 0 | kleiner LLOQ | #VALUE! | 1 | #VALUE! |
| 0      | T13 | C07 | 0 | kleiner LLOQ | #VALUE! | 1 | #VALUE! |
| 0      | T13 | C08 | 0 | kleiner LLOQ | #VALUE! | 1 | #VALUE! |
| 0      | T13 | C09 | 0 | kleiner LLOQ | #VALUE! | 1 | #VALUE! |
| 0      | T13 | C10 | 0 | kleiner LLOQ | #VALUE! | 1 | #VALUE! |
| 0      | T13 | C11 | 0 | kleiner LLOQ | #VALUE! | 1 | #VALUE! |
| 0      | T13 | C12 | 0 | kleiner LLOQ | #VALUE! | 1 | #VALUE! |
| 0      | T13 | D01 | 0 | kleiner LLOQ | #VALUE! | 1 | #VALUE! |
| 0      | T13 | D02 | 0 | kleiner LLOQ | #VALUE! | 1 | #VALUE! |
| 0      | T13 | D03 | 0 | kleiner LLOQ | #VALUE! | 1 | #VALUE! |
| 0      | T13 | D04 | 0 | kleiner LLOQ | #VALUE! | 1 | #VALUE! |
| 0      | T13 | D05 | 0 | kleiner LLOQ | #VALUE! | 1 | #VALUE! |
| 0      | T13 | D06 | 0 | kleiner LLOQ | #VALUE! | 1 | #VALUE! |
| T13SN2 | T13 | D07 | 0 | kleiner LLOQ | #VALUE! | 1 | #VALUE! |
| T13SN2 | T13 | D08 | 0 | kleiner LLOQ | #VALUE! | 1 | #VALUE! |
| T13SN3 | T13 | D09 | 0 | kleiner LLOQ | #VALUE! | 1 | #VALUE! |
| T13SN3 | T13 | D10 | 0 | kleiner LLOQ | #VALUE! | 1 | #VALUE! |
| T13SN4 | T13 | D11 | 0 | kleiner LLOQ | #VALUE! | 1 | #VALUE! |
| T13SN4 | T13 | D12 | 0 | kleiner LLOQ | #VALUE! | 1 | #VALUE! |

Plate: T13

|   | 1 | 2 | 3 | 4 | 5 | 6 | 7 | 8 | 9 | 10 | 11 | 12 |
|---|---|---|---|---|---|---|---|---|---|----|----|----|
| A |   |   |   |   |   |   |   |   |   |    |    |    |
| B |   |   |   |   |   |   |   |   |   |    |    |    |
| C |   |   |   |   |   |   |   |   |   |    |    |    |
| D |   |   |   |   |   |   |   |   |   |    |    |    |
| E |   |   |   |   |   |   |   |   |   |    |    |    |
| F |   |   |   |   |   |   |   |   |   |    |    |    |
| G |   |   |   |   |   |   |   |   |   |    |    |    |
| H |   |   |   |   |   |   |   |   |   |    |    |    |

Plattenbelegung

|   | 1 | 2 | 3 | 4 | 5       | 6       | 7            | 8            | 9            | 10           | 11           | 12           |        |
|---|---|---|---|---|---------|---------|--------------|--------------|--------------|--------------|--------------|--------------|--------|
| A |   |   |   |   |         |         |              |              |              |              |              |              |        |
| B |   |   |   |   |         |         |              |              |              |              |              |              |        |
| C |   |   |   |   |         |         |              |              |              |              |              |              |        |
| D |   |   |   |   |         |         |              | T13SN2       | T13SN2       | T13SN3       | T13SN3       | T13SN4       | T13SN4 |
| E |   |   |   |   | T13SS11 | T13SS11 | T13SS12      | T13SS12      | T13SS13      | T13SS13      | T13SS14      | T13SS14      |        |
| F |   |   |   |   | T13SS21 | T13SS21 | T13SS22      | T13SS22      | T13SS23      | T13SS23      | T13SS24      | T13SS24      |        |
| G |   |   |   |   |         |         | Blank PEG    | Blank PEG    | Blank PEG    | Blank PEG    | Blank PEG    | Blank PEG    |        |
| H |   |   |   |   |         |         | Blank no PEG | Blank no PEG | Blank no PEG | Blank no PEG | Blank no PEG | Blank no PEG |        |

Comment:

alle Messwerte bei lin low

Date Operator Date Control

|              |     |     |   |   |              |         |   |         |
|--------------|-----|-----|---|---|--------------|---------|---|---------|
| 0            | T13 | E01 | 0 | 0 | kleiner LLOQ | #VALUE! | 1 | #VALUE! |
| 0            | T13 | E02 | 0 | 0 | kleiner LLOQ | #VALUE! | 1 | #VALUE! |
| 0            | T13 | E03 | 0 | 0 | kleiner LLOQ | #VALUE! | 1 | #VALUE! |
| 0            | T13 | E04 | 0 | 0 | kleiner LLOQ | #VALUE! | 1 | #VALUE! |
| T13SS11      | T13 | E05 | 0 | 0 | kleiner LLOQ | #VALUE! | 1 | #VALUE! |
| T13SS11      | T13 | E06 | 0 | 0 | kleiner LLOQ | #VALUE! | 1 | #VALUE! |
| T13SS12      | T13 | E07 | 0 | 0 | kleiner LLOQ | #VALUE! | 1 | #VALUE! |
| T13SS12      | T13 | E08 | 0 | 0 | kleiner LLOQ | #VALUE! | 1 | #VALUE! |
| T13SS13      | T13 | E09 | 0 | 0 | kleiner LLOQ | #VALUE! | 1 | #VALUE! |
| T13SS13      | T13 | E10 | 0 | 0 | kleiner LLOQ | #VALUE! | 1 | #VALUE! |
| T13SS14      | T13 | E11 | 0 | 0 | kleiner LLOQ | #VALUE! | 1 | #VALUE! |
| T13SS14      | T13 | E12 | 0 | 0 | kleiner LLOQ | #VALUE! | 1 | #VALUE! |
| 0            | T13 | F01 | 0 | 0 | kleiner LLOQ | #VALUE! | 1 | #VALUE! |
| 0            | T13 | F02 | 0 | 0 | kleiner LLOQ | #VALUE! | 1 | #VALUE! |
| 0            | T13 | F03 | 0 | 0 | kleiner LLOQ | #VALUE! | 1 | #VALUE! |
| 0            | T13 | F04 | 0 | 0 | kleiner LLOQ | #VALUE! | 1 | #VALUE! |
| T13SS21      | T13 | F05 | 0 | 0 | kleiner LLOQ | #VALUE! | 1 | #VALUE! |
| T13SS21      | T13 | F06 | 0 | 0 | kleiner LLOQ | #VALUE! | 1 | #VALUE! |
| T13SS22      | T13 | F07 | 0 | 0 | kleiner LLOQ | #VALUE! | 1 | #VALUE! |
| T13SS22      | T13 | F08 | 0 | 0 | kleiner LLOQ | #VALUE! | 1 | #VALUE! |
| T13SS23      | T13 | F09 | 0 | 0 | kleiner LLOQ | #VALUE! | 1 | #VALUE! |
| T13SS23      | T13 | F10 | 0 | 0 | kleiner LLOQ | #VALUE! | 1 | #VALUE! |
| T13SS24      | T13 | F11 | 0 | 0 | kleiner LLOQ | #VALUE! | 1 | #VALUE! |
| T13SS24      | T13 | F12 | 0 | 0 | kleiner LLOQ | #VALUE! | 1 | #VALUE! |
| 0            | T13 | G01 | 0 | 0 | kleiner LLOQ | #VALUE! | 1 | #VALUE! |
| 0            | T13 | G02 | 0 | 0 | kleiner LLOQ | #VALUE! | 1 | #VALUE! |
| 0            | T13 | G03 | 0 | 0 | kleiner LLOQ | #VALUE! | 1 | #VALUE! |
| 0            | T13 | G04 | 0 | 0 | kleiner LLOQ | #VALUE! | 1 | #VALUE! |
| 0            | T13 | G05 | 0 | 0 | kleiner LLOQ | #VALUE! | 1 | #VALUE! |
| 0            | T13 | G06 | 0 | 0 | kleiner LLOQ | #VALUE! | 1 | #VALUE! |
| Blank PEG    | T13 | G07 | 0 | 0 | kleiner LLOQ | #VALUE! | 1 | #VALUE! |
| Blank PEG    | T13 | G08 | 0 | 0 | kleiner LLOQ | #VALUE! | 1 | #VALUE! |
| Blank PEG    | T13 | G09 | 0 | 0 | kleiner LLOQ | #VALUE! | 1 | #VALUE! |
| Blank PEG    | T13 | G10 | 0 | 0 | kleiner LLOQ | #VALUE! | 1 | #VALUE! |
| Blank PEG    | T13 | G11 | 0 | 0 | kleiner LLOQ | #VALUE! | 1 | #VALUE! |
| Blank PEG    | T13 | G12 | 0 | 0 | kleiner LLOQ | #VALUE! | 1 | #VALUE! |
| 0            | T13 | H01 | 0 | 0 | kleiner LLOQ | #VALUE! | 1 | #VALUE! |
| 0            | T13 | H02 | 0 | 0 | kleiner LLOQ | #VALUE! | 1 | #VALUE! |
| 0            | T13 | H03 | 0 | 0 | kleiner LLOQ | #VALUE! | 1 | #VALUE! |
| 0            | T13 | H04 | 0 | 0 | kleiner LLOQ | #VALUE! | 1 | #VALUE! |
| 0            | T13 | H05 | 0 | 0 | kleiner LLOQ | #VALUE! | 1 | #VALUE! |
| 0            | T13 | H06 | 0 | 0 | kleiner LLOQ | #VALUE! | 1 | #VALUE! |
| Blank no PEG | T13 | H07 | 0 | 0 | kleiner LLOQ | #VALUE! | 1 | #VALUE! |
| Blank no PEG | T13 | H08 | 0 | 0 | kleiner LLOQ | #VALUE! | 1 | #VALUE! |
| Blank no PEG | T13 | H09 | 0 | 0 | kleiner LLOQ | #VALUE! | 1 | #VALUE! |
| Blank no PEG | T13 | H10 | 0 | 0 | kleiner LLOQ | #VALUE! | 1 | #VALUE! |
| Blank no PEG | T13 | H11 | 0 | 0 | kleiner LLOQ | #VALUE! | 1 | #VALUE! |
| Blank no PEG | T13 | H12 | 0 | 0 | kleiner LLOQ | #VALUE! | 1 | #VALUE! |
| 0            | T14 | A01 | 0 | 0 | kleiner LLOQ | #VALUE! | 1 | #VALUE! |
| 0            | T14 | A02 | 0 | 0 | kleiner LLOQ | #VALUE! | 1 | #VALUE! |
| 0            | T14 | A03 | 0 | 0 | kleiner LLOQ | #VALUE! | 1 | #VALUE! |
| 0            | T14 | A04 | 0 | 0 | kleiner LLOQ | #VALUE! | 1 | #VALUE! |
| 0            | T14 | A05 | 0 | 0 | kleiner LLOQ | #VALUE! | 1 | #VALUE! |
| 0            | T14 | A06 | 0 | 0 | kleiner LLOQ | #VALUE! | 1 | #VALUE! |
| 0            | T14 | A07 | 0 | 0 | kleiner LLOQ | #VALUE! | 1 | #VALUE! |
| 0            | T14 | A08 | 0 | 0 | kleiner LLOQ | #VALUE! | 1 | #VALUE! |
| 0            | T14 | A09 | 0 | 0 | kleiner LLOQ | #VALUE! | 1 | #VALUE! |
| 0            | T14 | A10 | 0 | 0 | kleiner LLOQ | #VALUE! | 1 | #VALUE! |
| 0            | T14 | A11 | 0 | 0 | kleiner LLOQ | #VALUE! | 1 | #VALUE! |
| 0            | T14 | A12 | 0 | 0 | kleiner LLOQ | #VALUE! | 1 | #VALUE! |
| 0            | T14 | B01 | 0 | 0 | kleiner LLOQ | #VALUE! | 1 | #VALUE! |
| 0            | T14 | B02 | 0 | 0 | kleiner LLOQ | #VALUE! | 1 | #VALUE! |
| 0            | T14 | B03 | 0 | 0 | kleiner LLOQ | #VALUE! | 1 | #VALUE! |
| 0            | T14 | B04 | 0 | 0 | kleiner LLOQ | #VALUE! | 1 | #VALUE! |
| 0            | T14 | B05 | 0 | 0 | kleiner LLOQ | #VALUE! | 1 | #VALUE! |
| 0            | T14 | B06 | 0 | 0 | kleiner LLOQ | #VALUE! | 1 | #VALUE! |
| 0            | T14 | B07 | 0 | 0 | kleiner LLOQ | #VALUE! | 1 | #VALUE! |
| 0            | T14 | B08 | 0 | 0 | kleiner LLOQ | #VALUE! | 1 | #VALUE! |
| 0            | T14 | B09 | 0 | 0 | kleiner LLOQ | #VALUE! | 1 | #VALUE! |
| 0            | T14 | B10 | 0 | 0 | kleiner LLOQ | #VALUE! | 1 | #VALUE! |
| 0            | T14 | B11 | 0 | 0 | kleiner LLOQ | #VALUE! | 1 | #VALUE! |
| 0            | T14 | B12 | 0 | 0 | kleiner LLOQ | #VALUE! | 1 | #VALUE! |
| 0            | T14 | C01 | 0 | 0 | kleiner LLOQ | #VALUE! | 1 | #VALUE! |
| 0            | T14 | C02 | 0 | 0 | kleiner LLOQ | #VALUE! | 1 | #VALUE! |
| 0            | T14 | C03 | 0 | 0 | kleiner LLOQ | #VALUE! | 1 | #VALUE! |

Plate: T14

|   |   |   |   |   |   |   |   |   |   |    |    |    |
|---|---|---|---|---|---|---|---|---|---|----|----|----|
|   | 1 | 2 | 3 | 4 | 5 | 6 | 7 | 8 | 9 | 10 | 11 | 12 |
| A |   |   |   |   |   |   |   |   |   |    |    |    |
| B |   |   |   |   |   |   |   |   |   |    |    |    |
| C |   |   |   |   |   |   |   |   |   |    |    |    |
| D |   |   |   |   |   |   |   |   |   |    |    |    |
| E |   |   |   |   |   |   |   |   |   |    |    |    |
| F |   |   |   |   |   |   |   |   |   |    |    |    |
| G |   |   |   |   |   |   |   |   |   |    |    |    |
| H |   |   |   |   |   |   |   |   |   |    |    |    |

Plattenbelegung

|   |   |   |   |   |         |         |           |           |           |           |           |           |
|---|---|---|---|---|---------|---------|-----------|-----------|-----------|-----------|-----------|-----------|
|   | 1 | 2 | 3 | 4 | 5       | 6       | 7         | 8         | 9         | 10        | 11        | 12        |
| A |   |   |   |   |         |         |           |           |           |           |           |           |
| B |   |   |   |   |         |         |           |           |           |           |           |           |
| C |   |   |   |   |         |         |           |           |           |           |           |           |
| D |   |   |   |   |         |         |           |           |           |           |           |           |
| E |   |   |   |   | T14SS11 | T14SS11 | T14SN2    | T14SN2    | T14SN3    | T14SN3    | T14SN4    | T14SN4    |
| F |   |   |   |   | T14SS21 | T14SS21 | T14SS22   | T14SS22   | T14SS23   | T14SS23   | T14SS24   | T14SS24   |
| G |   |   |   |   |         |         | Blank PEG | Blank PEG | Blank PEG | Blank PEG | Blank PEG | Blank PEG |



|       |       |       |       |       |       |       |       |       |       |       |       |
|-------|-------|-------|-------|-------|-------|-------|-------|-------|-------|-------|-------|
| 1.447 | 1.739 |       | 1.170 |       |       |       |       |       | 0.667 | 0.440 | 0.043 |
| 1.447 | 1.332 |       | 1.392 | 0.137 | 0.146 | 0.130 | 0.138 | 0.109 | 0.729 | 0.478 | 0.042 |
| 1.391 | 1.281 |       | 1.311 | 0.204 | 0.184 | 0.184 | 0.198 | 0.201 | 0.743 | 0.474 | 0.043 |
| 0.961 | 0.835 |       | 1.405 | 0.336 | 0.347 | 0.375 | 0.387 | 0.300 | 0.824 | 0.483 | 0.044 |
| 0.445 | 0.441 |       | 1.280 | 1.085 | 1.086 | 1.218 | 1.004 | 0.873 | 0.704 | 0.457 | 0.041 |
| 0.355 | 0.315 |       | 1.332 | 1.768 | 1.925 | 1.753 | 1.739 | 1.606 |       |       | 0.036 |
| 0.223 | 0.188 | 1.666 | 1.499 | 1.632 |       | 0.048 | 0.046 | 0.047 | 0.048 | 0.048 | 0.048 |
| 0.118 | 0.106 | 1.556 | 1.622 | 1.573 |       | 0.047 | 0.054 | 0.051 | 0.051 | 0.052 | 0.051 |

1

|       |       |       |       |       |       |       |       |       |       |       |       |
|-------|-------|-------|-------|-------|-------|-------|-------|-------|-------|-------|-------|
| 1.652 | 1.627 |       | 1.188 | 0.748 | 0.811 | 0.764 | 0.753 | 0.674 | 0.751 | 0.529 | 0.044 |
| 1.443 | 1.372 |       | 1.364 | 0.139 | 0.147 | 0.131 | 0.139 | 0.110 | 0.811 | 0.561 | 0.043 |
| 1.377 | 1.281 |       | 1.284 | 0.206 | 0.189 | 0.184 | 0.200 | 0.202 | 0.821 | 0.560 | 0.044 |
| 0.972 | 0.883 |       | 1.387 | 0.339 | 0.349 | 0.386 | 0.406 | 0.312 | 0.903 | 0.565 | 0.044 |
| 0.484 | 0.474 |       | 1.298 | 1.087 | 1.113 | 1.203 | 1.022 | 0.903 | 0.790 | 0.544 | 0.042 |
| 0.359 | 0.326 |       | 1.308 | 1.622 | 1.622 | 1.630 | 1.625 | 1.550 |       |       | 0.037 |
| 0.228 | 0.199 | 1.527 | 1.373 | 1.462 |       | 0.048 | 0.046 | 0.048 | 0.049 | 0.049 | 0.049 |
| 0.125 | 0.109 | 1.473 | 1.410 | 1.371 |       | 0.048 | 0.054 | 0.052 | 0.052 | 0.052 | 0.051 |

2

|       |       |       |       |       |       |       |       |       |       |       |       |
|-------|-------|-------|-------|-------|-------|-------|-------|-------|-------|-------|-------|
| 1.579 | 1.475 |       | 1.150 | 1.210 | 1.303 | 1.202 | 1.219 | 1.125 | 0.759 | 0.549 | 0.043 |
| 1.357 | 1.303 |       | 1.283 | 0.140 | 0.148 | 0.131 | 0.139 | 0.111 | 0.820 | 0.575 | 0.043 |
| 1.323 | 1.228 |       | 1.227 | 0.206 | 0.188 | 0.184 | 0.198 | 0.201 | 0.824 | 0.579 | 0.043 |
| 0.959 | 0.872 |       | 1.321 | 0.339 | 0.348 | 0.387 | 0.406 | 0.314 | 0.909 | 0.580 | 0.044 |
| 0.483 | 0.473 |       | 1.270 | 1.069 | 1.103 | 1.181 | 1.017 | 0.903 | 0.798 | 0.560 | 0.042 |
| 0.360 | 0.326 |       | 1.270 | 1.497 | 1.448 | 1.496 | 1.494 | 1.449 |       |       | 0.037 |
| 0.228 | 0.199 | 1.374 | 1.262 | 1.314 |       | 0.048 | 0.046 | 0.048 | 0.049 | 0.049 | 0.049 |
| 0.125 | 0.110 | 1.346 | 1.262 | 1.253 |       | 0.048 | 0.054 | 0.052 | 0.052 | 0.052 | 0.051 |

3

|       |       |  |  |       |       |       |       |       |       |       |       |
|-------|-------|--|--|-------|-------|-------|-------|-------|-------|-------|-------|
| 1.511 | 1.369 |  |  | 1.538 | 1.712 | 1.528 | 1.502 | 1.425 |       |       | 0.043 |
| 1.296 | 1.261 |  |  |       |       |       |       |       |       |       | 0.043 |
| 1.272 | 1.193 |  |  |       |       |       |       |       |       |       | 0.043 |
| 0.947 | 0.859 |  |  |       |       |       |       |       |       |       | 0.044 |
| 0.481 | 0.471 |  |  |       |       |       |       |       |       |       | 0.042 |
| 0.361 | 0.325 |  |  |       |       |       |       |       |       |       | 0.037 |
| 0.229 | 0.199 |  |  |       |       | 0.048 | 0.046 | 0.048 | 0.049 | 0.049 | 0.049 |
| 0.125 | 0.110 |  |  |       |       | 0.047 | 0.054 | 0.052 | 0.052 | 0.052 | 0.051 |

4

|       |       |       |       |       |       |       |       |       |       |       |       |
|-------|-------|-------|-------|-------|-------|-------|-------|-------|-------|-------|-------|
| 1.493 | 1.317 | 1.678 | 1.110 | 1.621 | 1.807 | 1.618 | 1.584 | 1.508 | 0.765 | 0.597 | 0.043 |
| 1.259 | 1.238 | 1.850 | 1.197 | 0.139 | 0.150 | 0.132 | 0.139 | 0.111 | 0.821 | 0.588 | 0.043 |
| 1.248 | 1.175 | 1.816 | 1.153 | 0.204 | 0.188 | 0.184 | 0.197 | 0.199 | 0.831 | 0.599 | 0.044 |
| 0.943 | 0.859 | 1.970 | 1.231 | 0.338 | 0.357 | 0.386 | 0.406 | 0.316 | 0.916 | 0.595 | 0.044 |
| 0.480 | 0.470 | 2.220 | 1.220 | 1.054 | 1.088 | 1.154 | 1.006 | 0.902 | 0.805 | 0.579 | 0.042 |
| 0.359 | 0.325 | 2.149 | 1.211 | 1.395 | 1.324 | 1.348 | 1.345 | 1.317 | 0.037 | 0.037 | 0.037 |
| 0.228 | 0.199 | 1.240 | 1.151 | 1.183 | 0.034 | 0.049 | 0.046 | 0.048 | 0.049 | 0.049 | 0.049 |
| 0.125 | 0.110 | 1.223 | 1.132 | 1.146 | 0.038 | 0.048 | 0.054 | 0.052 | 0.052 | 0.052 | 0.051 |

5

|       |       |  |       |       |       |       |       |       |       |       |       |
|-------|-------|--|-------|-------|-------|-------|-------|-------|-------|-------|-------|
| 1.434 | 1.258 |  | 1.090 | 1.648 | 1.876 | 1.649 | 1.627 | 1.535 |       |       |       |
| 1.217 | 1.201 |  | 1.149 |       |       |       |       |       |       |       |       |
| 1.205 | 1.143 |  | 1.109 |       |       |       |       |       |       |       |       |
| 0.935 | 0.845 |  | 1.182 |       |       |       |       |       |       |       |       |
| 0.477 | 0.469 |  | 1.181 |       |       |       |       |       |       |       |       |
| 0.360 | 0.323 |  | 1.167 |       |       |       |       |       |       |       |       |
| 0.229 | 0.200 |  |       |       |       | 0.049 | 0.047 | 0.048 | 0.049 | 0.049 | 0.049 |
| 0.125 | 0.110 |  |       |       |       | 0.048 | 0.054 | 0.052 | 0.052 | 0.052 | 0.051 |

6

|       |       |       |       |       |       |       |       |       |       |       |       |
|-------|-------|-------|-------|-------|-------|-------|-------|-------|-------|-------|-------|
| 1.013 | 0.810 |       | 0.668 | 0.808 | 0.940 | 0.720 | 0.798 | 0.687 | 0.904 | 0.845 | 0.043 |
| 0.709 | 0.827 |       | 0.703 | 0.142 | 0.156 | 0.136 | 0.137 | 0.116 | 0.990 | 0.846 | 0.042 |
| 0.682 | 0.692 |       | 0.680 | 0.197 | 0.188 | 0.190 | 0.191 | 0.184 | 1.023 | 0.861 | 0.043 |
| 0.507 | 0.519 |       | 0.740 | 0.316 | 0.264 | 0.364 | 0.377 | 0.312 | 1.111 | 0.870 | 0.043 |
| 0.394 | 0.406 |       | 0.682 | 0.580 | 0.561 | 0.600 | 0.529 | 0.563 | 0.962 | 0.834 | 0.042 |
| 0.333 | 0.322 |       | 0.661 | 0.995 | 0.930 | 0.848 | 0.832 | 0.797 | 0.037 | 0.037 | 0.037 |
| 0.229 | 0.201 | 0.843 | 0.679 | 0.732 |       | 0.048 | 0.046 | 0.047 |       |       | 0.047 |
| 0.124 | 0.111 | 0.773 | 0.682 | 0.701 |       | 0.047 | 0.053 | 0.051 | 0.051 | 0.052 | 0.051 |

7

skin cultivation



|                    |              |                              |                      |                           |                              |
|--------------------|--------------|------------------------------|----------------------|---------------------------|------------------------------|
| Project number     | F-120        | Apparatus                    | Wallac Victor        | Operator                  | IsBa                         |
| GLP Study (Number) | n.a.         | Protocol (Instrument method) | LDH test 2016        | Date of preparation       | 19-04-18                     |
| hot substance      | isotope name | n.a.                         | File name (results)  | IsBa_180419/20_LDH_full.v | Date of measurement          |
|                    | ACB-ID       | n.a.                         | Kind of well plate   | 96 well                   | shaking time [min]           |
|                    | Batch number | n.a.                         | sample volume [µL]   | 100                       | stirring rate (Target) [rpm] |
| cold substance     | Batch number | n.a.                         | Cocktail volume [µL] | 175                       | Kind of measurement          |
|                    | name         | LDH                          | ACB-ID of cocktail   | n.a.                      | Wave length [nm]             |
|                    | ACB-ID       | L23982R                      | Matrix               | DMEM (from powder)+PEG    | Remarks                      |
|                    | Batch number | SLBK6345V                    | Blank description    | DMEM/PEG, H2O             | Remarks                      |
| n.a.               | n.a.         | Pipettes (No. / volume)      | 50-200µl             | Remarks                   | KLP4 common for both         |
| n.a.               | n.a.         | Pipettes (No. / volume)      | n.a.                 | Remarks                   | n.a.                         |

**Messdaten (diese Tabelle in Bericht übernehmen)**

| Sample name * | concentration (theor.) * | measured data | measured data | measured data | mean measured | SD    | RSD  | Blank * | measured data after * Blank subtraction | concentration (calc.) * | Deviation * | Residuen |
|---------------|--------------------------|---------------|---------------|---------------|---------------|-------|------|---------|-----------------------------------------|-------------------------|-------------|----------|
|               | [µg/mL]                  | [AU]          | [AU]          | [AU]          | [AU]          | [AU]  | [%]  | [AU]    |                                         | [µg/mL]                 | [%]         |          |
| KLP1          |                          |               |               |               |               |       |      | 0.047   |                                         |                         |             |          |
| KLP2          |                          |               |               |               |               |       |      | 0.054   |                                         |                         |             |          |
| KLP3          |                          |               |               |               |               |       |      | 0.051   |                                         |                         |             |          |
| KLP4          | 0.041                    | 0.959         | 0.972         | 0.883         | 0.938         | 0.04  | 4.19 | 0.051   | 0.887                                   | 0.041                   | -0.57       | 0.00     |
| KLP5          | 0.018                    | 0.483         | 0.484         | 0.474         | 0.480         | 0.00  | 0.98 | 0.052   | 0.429                                   | 0.019                   | 2.42        | 0.00     |
| KLP6          | 0.012                    | 0.360         | 0.359         | 0.326         | 0.348         | 0.02  | 4.54 | 0.051   | 0.297                                   | 0.013                   | 5.00        | 0.00     |
| KLP7          | 0.007                    | 0.228         | 0.228         | 0.199         | 0.218         | 0.014 | 6.35 |         | 0.168                                   | 0.006                   | -11.29      | 0.00     |
| KLP8          |                          |               |               |               |               |       |      |         |                                         |                         |             |          |

**Statistical data**

|                                              |                                          |                     |              |
|----------------------------------------------|------------------------------------------|---------------------|--------------|
| Geradensteigung                              | Slope                                    | m                   | 21.03        |
| Y-Achsenabschnitt                            | Y-intercept                              | b                   | 0.03         |
| Standardabw. Geradensteigung                 | SD-Slope                                 | S <sub>m</sub>      | 0.64805501   |
| Standardabw. Achsenabschnittes               | SD-Y-intercept                           | S <sub>b</sub>      | 0.015177452  |
| Anzahl Messpunkte                            | number of measuring points               | n                   | 4            |
| Quadratsumme                                 | sum of squares                           | Q <sub>xx</sub>     | 0.000664048  |
| Bereichsmittle                               |                                          |                     | 0.019557193  |
| Freiheitsgrade                               | degree of freedom                        | f                   | 2            |
| Student-t-Faktor für (P = 95 %; f = n-2)     | Student-t-factor for (P = 95 %; f = n-2) | t                   | 4.303        |
| Vertrauensbereich Steig. (95 %) Obergrenze   |                                          | m + VB <sub>m</sub> | 23.81763508  |
| Vertrauensbereich Steig. (95 %) Untergrenze  |                                          | m - VB <sub>m</sub> | 18.24046944  |
| Vertrauensbereich Achsenabschnitt (95 %) Og. |                                          | b + VB <sub>b</sub> | 0.099335829  |
| Vertrauensbereich Achsenabschnitt (95 %) Ug. |                                          | b - VB <sub>b</sub> | -0.031281327 |
| Korrelationskoeffizient                      | correlation coefficient                  | r                   | 0.9991       |
| Bestimmtheitsmaß                             | determination coefficient                | r <sup>2</sup>      | 0.9981       |
| Reststandardabweichung                       |                                          | S <sub>0</sub>      | 0.01669983   |
| Summe Restquadrate                           |                                          | sd                  | 0.657385838  |
| Verfahrensstandardabw.                       |                                          | S <sub>00</sub>     | 0.000794131  |
| Rel. Verfahrensstandardabw. %                |                                          | V <sub>00</sub>     | 4.060559029  |

**Berichten**

|                  |              |
|------------------|--------------|
| mean Blank       | 0            |
| SD Blank         | 0.00         |
| RSD Blank        | 3.79         |
| x*SD (LLOQ)      | 0.01         |
| x*SD (LOD)       | 0.01         |
| <b>LLOQ (AU)</b> | <b>0.061</b> |
| <b>LOD (AU)</b>  | <b>0.057</b> |
| ULOQ             | 0.887        |
| LLOQ (Lin)       | 0.168        |

**Evaluation / Comment**

LDH linearity valid with 7 standards, split in lin high and lin low, each with 4 standards and KLP4 common standard for both. R<sup>2</sup> 0,9981, deviations for both between -13.34% and +13.04%

Figure 1 Linearity

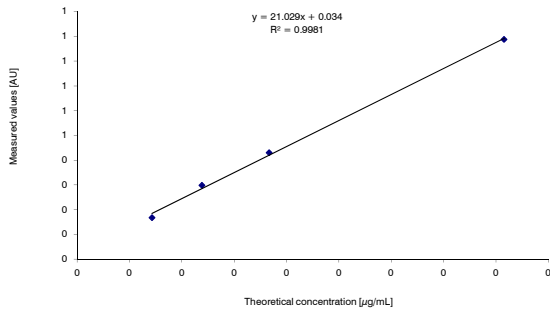

Figure 2 Method validation Residuen Plot

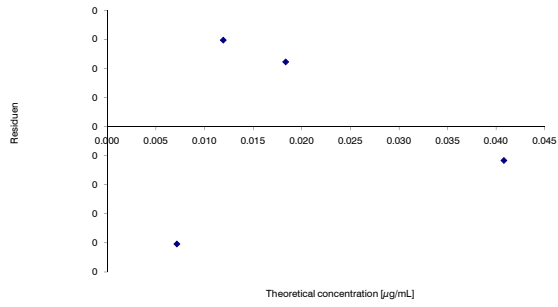

Evaluation / Comment

lin passed.





| Sample name | Plate | Position | [AU]  | [AU]-Blank | Rating       | [µg/mL] | Dilution factor | [µg/mL] |
|-------------|-------|----------|-------|------------|--------------|---------|-----------------|---------|
| 0           | T0/T1 | A01      | 0     | 0          | kleiner LLOQ | #VALUE! | 1               | #VALUE! |
| 0           | T0/T1 | A02      | 0     | 0          | kleiner LLOQ | #VALUE! | 1               | #VALUE! |
| 0           | T0/T1 | A03      | 0     | 0          | kleiner LLOQ | #VALUE! | 1               | #VALUE! |
| 0           | T0/T1 | A04      | 0     | 0          | kleiner LLOQ | #VALUE! | 1               | #VALUE! |
| TOKIN1      | T0/T1 | A05      | 0.799 | 0.748      | 0.748        | 0.034   | 30.25           | 1.026   |
| TOKIN1      | T0/T1 | A06      | 0.787 | 0.736      | 0.736        | 0.033   | 30.25           | 1.010   |
| TOKIN2      | T0/T1 | A07      | 0     | 0          | kleiner LLOQ | #VALUE! | 1               | #VALUE! |
| TOKIN2      | T0/T1 | A08      | 0     | 0          | kleiner LLOQ | #VALUE! | 1               | #VALUE! |
| TOKIN3      | T0/T1 | A09      | 0     | 0          | kleiner LLOQ | #VALUE! | 1               | #VALUE! |
| TOKIN3      | T0/T1 | A10      | 0     | 0          | kleiner LLOQ | #VALUE! | 1               | #VALUE! |
| TOKIN4      | T0/T1 | A11      | 0.192 | 0.141      | kleiner LLOQ | #VALUE! | 2.75            | #VALUE! |
| TOKIN4      | T0/T1 | A12      | 0.198 | 0.147      | kleiner LLOQ | #VALUE! | 2.75            | #VALUE! |
| 0           | T0/T1 | B01      | 0     | 0          | kleiner LLOQ | #VALUE! | 1               | #VALUE! |
| 0           | T0/T1 | B02      | 0     | 0          | kleiner LLOQ | #VALUE! | 1               | #VALUE! |
| 0           | T0/T1 | B03      | 0     | 0          | kleiner LLOQ | #VALUE! | 1               | #VALUE! |
| 0           | T0/T1 | B04      | 0     | 0          | kleiner LLOQ | #VALUE! | 1               | #VALUE! |
| TOKIS11     | T0/T1 | B05      | 0     | 0          | kleiner LLOQ | #VALUE! | 1               | #VALUE! |
| TOKIS11     | T0/T1 | B06      | 0     | 0          | kleiner LLOQ | #VALUE! | 1               | #VALUE! |
| TOKIS12     | T0/T1 | B07      | 0.343 | 0.292      | 0.292        | 0.012   | 30.25           | 0.372   |
| TOKIS12     | T0/T1 | B08      | 0.772 | 0.721      | 0.721        | 0.033   | 30.25           | 0.988   |
| TOKIS13     | T0/T1 | B09      | 0.624 | 0.573      | 0.573        | 0.026   | 30.25           | 0.776   |
| TOKIS13     | T0/T1 | B10      | 0.875 | 0.824      | 0.824        | 0.038   | 30.25           | 1.136   |
| TOKIS14     | T0/T1 | B11      | 0.228 | 0.177      | 0.177        | 0.007   | 2.75            | 0.019   |
| TOKIS14     | T0/T1 | B12      | 0.278 | 0.227      | 0.227        | 0.009   | 2.75            | 0.025   |
| 0           | T0/T1 | C01      | 0     | 0          | kleiner LLOQ | #VALUE! | 1               | #VALUE! |
| 0           | T0/T1 | C02      | 0     | 0          | kleiner LLOQ | #VALUE! | 1               | #VALUE! |
| 0           | T0/T1 | C03      | 0     | 0          | kleiner LLOQ | #VALUE! | 1               | #VALUE! |
| 0           | T0/T1 | C04      | 0     | 0          | kleiner LLOQ | #VALUE! | 1               | #VALUE! |
| TOKIS21     | T0/T1 | C05      | 0.616 | 0.565      | 0.565        | 0.025   | 30.25           | 0.763   |
| TOKIS21     | T0/T1 | C06      | 0.793 | 0.742      | 0.742        | 0.034   | 30.25           | 1.018   |
| TOKIS22     | T0/T1 | C07      | 0     | 0          | kleiner LLOQ | #VALUE! | 1               | #VALUE! |
| TOKIS22     | T0/T1 | C08      | 0     | 0          | kleiner LLOQ | #VALUE! | 1               | #VALUE! |
| TOKIS23     | T0/T1 | C09      | 0     | 0          | kleiner LLOQ | #VALUE! | 1               | #VALUE! |
| TOKIS23     | T0/T1 | C10      | 0     | 0          | kleiner LLOQ | #VALUE! | 1               | #VALUE! |
| TOKIS24     | T0/T1 | C11      | 0.173 | 0.122      | kleiner LLOQ | #VALUE! | 2.75            | #VALUE! |
| TOKIS24     | T0/T1 | C12      | 0.188 | 0.137      | kleiner LLOQ | #VALUE! | 2.75            | #VALUE! |
| 0           | T0/T1 | D01      | 0     | 0          | kleiner LLOQ | #VALUE! | 1               | #VALUE! |
| 0           | T0/T1 | D02      | 0     | 0          | kleiner LLOQ | #VALUE! | 1               | #VALUE! |
| 0           | T0/T1 | D03      | 0     | 0          | kleiner LLOQ | #VALUE! | 1               | #VALUE! |
| 0           | T0/T1 | D04      | 0     | 0          | kleiner LLOQ | #VALUE! | 1               | #VALUE! |
| T1KIN1      | T0/T1 | D05      | 0.461 | 0.410      | 0.410        | 0.018   | 27.5            | 0.491   |
| T1KIN1      | T0/T1 | D06      | 0.435 | 0.384      | 0.384        | 0.017   | 27.5            | 0.458   |
| T1KIN2      | T0/T1 | D07      | 0.387 | 0.336      | 0.336        | 0.014   | 27.5            | 0.395   |
| T1KIN2      | T0/T1 | D08      | 0.371 | 0.320      | 0.320        | 0.014   | 27.5            | 0.374   |
| T1KIN3      | T0/T1 | D09      | 0.386 | 0.335      | 0.335        | 0.014   | 27.5            | 0.393   |
| T1KIN3      | T0/T1 | D10      | 0.389 | 0.338      | 0.338        | 0.014   | 27.5            | 0.397   |
| T1KIN4      | T0/T1 | D11      | 0.128 | 0.077      | kleiner LLOQ | #VALUE! | 2.75            | #VALUE! |
| T1KIN4      | T0/T1 | D12      | 0.131 | 0.080      | kleiner LLOQ | #VALUE! | 2.75            | #VALUE! |

Plate: T0/T1

| Test | Test | Test | Test | Test  | Test  | Test  | Test  | Test  | Test  | Test  | Test  | Test  | Test  |
|------|------|------|------|-------|-------|-------|-------|-------|-------|-------|-------|-------|-------|
| 1    | 2    | 3    | 4    | 5     | 6     | 7     | 8     | 9     | 10    | 11    | 12    | 13    | 14    |
| A    |      |      |      | 0.799 | 0.787 |       |       |       |       |       |       | 0.192 | 0.198 |
| B    |      |      |      |       |       | 0.343 | 0.772 | 0.624 | 0.875 | 0.228 | 0.278 |       |       |
| C    |      |      |      | 0.616 | 0.793 |       |       |       |       | 0.173 | 0.188 |       |       |
| D    |      |      |      | 0.461 | 0.435 | 0.387 | 0.371 | 0.386 | 0.389 | 0.128 | 0.131 |       |       |
| E    |      |      |      | 0.644 | 0.656 | 0.482 | 0.491 | 0.431 | 0.422 | 0.171 | 0.166 |       |       |
| F    |      |      |      | 0.150 | 0.150 | 0.189 | 0.191 | 0.155 | 0.154 | 0.055 | 0.127 |       |       |
| G    |      |      |      |       |       |       |       | 0.050 | 0.051 | 0.049 | 0.045 | 0.047 | 0.049 |
| H    |      |      |      |       |       |       |       | 0.049 | 0.048 | 0.048 | 0.048 | 0.048 | 0.048 |

| Plattenbelegung | 1 | 2 | 3 | 4 | 5       | 6       | 7            | 8            | 9            | 10           | 11           | 12           |
|-----------------|---|---|---|---|---------|---------|--------------|--------------|--------------|--------------|--------------|--------------|
| A               |   |   |   |   | TOKIN1  | TOKIN1  | TOKIN2       | TOKIN2       | TOKIN3       | TOKIN3       | TOKIN4       | TOKIN4       |
| B               |   |   |   |   | TOKIS11 | TOKIS11 | TOKIS12      | TOKIS12      | TOKIS13      | TOKIS13      | TOKIS14      | TOKIS14      |
| C               |   |   |   |   | TOKIS21 | TOKIS21 | TOKIS22      | TOKIS22      | TOKIS23      | TOKIS23      | TOKIS24      | TOKIS24      |
| D               |   |   |   |   | T1KIN1  | T1KIN1  | T1KIN2       | T1KIN2       | T1KIN3       | T1KIN3       | T1KIN4       | T1KIN4       |
| E               |   |   |   |   | T1KIS11 | T1KIS11 | T1KIS12      | T1KIS12      | T1KIS13      | T1KIS13      | T1KIS14      | T1KIS14      |
| F               |   |   |   |   | T1KIS21 | T1KIS21 | T1KIS22      | T1KIS22      | T1KIS23      | T1KIS23      | T1KIS24      | T1KIS24      |
| G               |   |   |   |   |         |         | Blank PEG    | Blank PEG    | Blank PEG    | Blank PEG    | Blank PEG    | Blank PEG    |
| H               |   |   |   |   |         |         | Blank no PEG | Blank no PEG | Blank no PEG | Blank no PEG | Blank no PEG | Blank no PEG |

Samples aufgeteilt in lin high und low.höher konzentrierte Samples bei lin high zu finden.

Comment: T0 dil.11\*dil2,75=dil.30,25  
T1 dil.10\*dil2,75=dil.27,5

Date Operator

Date Control

|              |       |     |       |       |              |         |      |         |
|--------------|-------|-----|-------|-------|--------------|---------|------|---------|
| 0            | T0/T1 | E01 | 0     | 0     | kleiner LLOQ | #VALUE! | 1    | #VALUE! |
| 0            | T0/T1 | E02 | 0     | 0     | kleiner LLOQ | #VALUE! | 1    | #VALUE! |
| 0            | T0/T1 | E03 | 0     | 0     | kleiner LLOQ | #VALUE! | 1    | #VALUE! |
| 0            | T0/T1 | E04 | 0     | 0     | kleiner LLOQ | #VALUE! | 1    | #VALUE! |
| T1KIS11      | T0/T1 | E05 | 0.644 | 0.593 | 0.593        | 0.027   | 27.5 | 0.731   |
| T1KIS11      | T0/T1 | E06 | 0.656 | 0.605 | 0.605        | 0.027   | 27.5 | 0.747   |
| T1KIS12      | T0/T1 | E07 | 0.482 | 0.432 | 0.432        | 0.019   | 27.5 | 0.520   |
| T1KIS12      | T0/T1 | E08 | 0.491 | 0.440 | 0.440        | 0.019   | 27.5 | 0.531   |
| T1KIS13      | T0/T1 | E09 | 0.431 | 0.380 | 0.380        | 0.016   | 27.5 | 0.452   |
| T1KIS13      | T0/T1 | E10 | 0.422 | 0.371 | 0.371        | 0.016   | 27.5 | 0.441   |
| T1KIS14      | T0/T1 | E11 | 0.171 | 0.120 | kleiner LLOQ | #VALUE! | 2.75 | #VALUE! |
| T1KIS14      | T0/T1 | E12 | 0.166 | 0.115 | kleiner LLOQ | #VALUE! | 2.75 | #VALUE! |
| 0            | T0/T1 | F01 | 0     | 0     | kleiner LLOQ | #VALUE! | 1    | #VALUE! |
| 0            | T0/T1 | F02 | 0     | 0     | kleiner LLOQ | #VALUE! | 1    | #VALUE! |
| 0            | T0/T1 | F03 | 0     | 0     | kleiner LLOQ | #VALUE! | 1    | #VALUE! |
| 0            | T0/T1 | F04 | 0     | 0     | kleiner LLOQ | #VALUE! | 1    | #VALUE! |
| T1KIS21      | T0/T1 | F05 | 0.150 | 0.099 | kleiner LLOQ | #VALUE! | 27.5 | #VALUE! |
| T1KIS21      | T0/T1 | F06 | 0.150 | 0.099 | kleiner LLOQ | #VALUE! | 27.5 | #VALUE! |
| T1KIS22      | T0/T1 | F07 | 0.189 | 0.138 | kleiner LLOQ | #VALUE! | 27.5 | #VALUE! |
| T1KIS22      | T0/T1 | F08 | 0.191 | 0.140 | kleiner LLOQ | #VALUE! | 27.5 | #VALUE! |
| T1KIS23      | T0/T1 | F09 | 0.155 | 0.104 | kleiner LLOQ | #VALUE! | 27.5 | #VALUE! |
| T1KIS23      | T0/T1 | F10 | 0.154 | 0.103 | kleiner LLOQ | #VALUE! | 27.5 | #VALUE! |
| T1KIS24      | T0/T1 | F11 | 0.055 | 0.005 | kleiner LLOQ | #VALUE! | 2.75 | #VALUE! |
| T1KIS24      | T0/T1 | F12 | 0.127 | 0.076 | kleiner LLOQ | #VALUE! | 2.75 | #VALUE! |
| 0            | T0/T1 | G01 | 0     | 0     | kleiner LLOQ | #VALUE! | 1    | #VALUE! |
| 0            | T0/T1 | G02 | 0     | 0     | kleiner LLOQ | #VALUE! | 1    | #VALUE! |
| 0            | T0/T1 | G03 | 0     | 0     | kleiner LLOQ | #VALUE! | 1    | #VALUE! |
| 0            | T0/T1 | G04 | 0     | 0     | kleiner LLOQ | #VALUE! | 1    | #VALUE! |
| 0            | T0/T1 | G05 | 0     | 0     | kleiner LLOQ | #VALUE! | 1    | #VALUE! |
| 0            | T0/T1 | G06 | 0     | 0     | kleiner LLOQ | #VALUE! | 1    | #VALUE! |
| Blank PEG    | T0/T1 | G07 | 0     | 0     | kleiner LLOQ | #VALUE! | 2.75 | #VALUE! |
| Blank PEG    | T0/T1 | G08 | 0     | 0     | kleiner LLOQ | #VALUE! | 2.75 | #VALUE! |
| Blank PEG    | T0/T1 | G09 | 0     | 0     | kleiner LLOQ | #VALUE! | 2.75 | #VALUE! |
| Blank PEG    | T0/T1 | G10 | 0     | 0     | kleiner LLOQ | #VALUE! | 2.75 | #VALUE! |
| Blank PEG    | T0/T1 | G11 | 0     | 0     | kleiner LLOQ | #VALUE! | 2.75 | #VALUE! |
| Blank PEG    | T0/T1 | G12 | 0     | 0     | kleiner LLOQ | #VALUE! | 2.75 | #VALUE! |
| 0            | T0/T1 | H01 | 0     | 0     | kleiner LLOQ | #VALUE! | 1    | #VALUE! |
| 0            | T0/T1 | H02 | 0     | 0     | kleiner LLOQ | #VALUE! | 1    | #VALUE! |
| 0            | T0/T1 | H03 | 0     | 0     | kleiner LLOQ | #VALUE! | 1    | #VALUE! |
| 0            | T0/T1 | H04 | 0     | 0     | kleiner LLOQ | #VALUE! | 1    | #VALUE! |
| 0            | T0/T1 | H05 | 0     | 0     | kleiner LLOQ | #VALUE! | 1    | #VALUE! |
| 0            | T0/T1 | H06 | 0     | 0     | kleiner LLOQ | #VALUE! | 1    | #VALUE! |
| Blank no PEG | T0/T1 | H07 | 0     | 0     | kleiner LLOQ | #VALUE! | 2.75 | #VALUE! |
| Blank no PEG | T0/T1 | H08 | 0     | 0     | kleiner LLOQ | #VALUE! | 2.75 | #VALUE! |
| Blank no PEG | T0/T1 | H09 | 0     | 0     | kleiner LLOQ | #VALUE! | 2.75 | #VALUE! |
| Blank no PEG | T0/T1 | H10 | 0     | 0     | kleiner LLOQ | #VALUE! | 2.75 | #VALUE! |
| Blank no PEG | T0/T1 | H11 | 0     | 0     | kleiner LLOQ | #VALUE! | 2.75 | #VALUE! |
| Blank no PEG | T0/T1 | H12 | 0     | 0     | kleiner LLOQ | #VALUE! | 2.75 | #VALUE! |

|         |       |     |       |       |              |         |       |         |
|---------|-------|-----|-------|-------|--------------|---------|-------|---------|
| 0       | T2/T3 | A01 | 0     | 0     | kleiner LLOQ | #VALUE! | 1     | #VALUE! |
| 0       | T2/T3 | A02 | 0     | 0     | kleiner LLOQ | #VALUE! | 1     | #VALUE! |
| 0       | T2/T3 | A03 | 0     | 0     | kleiner LLOQ | #VALUE! | 1     | #VALUE! |
| 0       | T2/T3 | A04 | 0     | 0     | kleiner LLOQ | #VALUE! | 1     | #VALUE! |
| T2KIN1  | T2/T3 | A05 | 1     | 0.455 | 0.455        | 0.020   | 24.75 | 0.496   |
| T2KIN1  | T2/T3 | A06 | 1     | 0.468 | 0.468        | 0.021   | 24.75 | 0.510   |
| T2KIN2  | T2/T3 | A07 | 0     | 0.425 | 0.425        | 0.019   | 24.75 | 0.460   |
| T2KIN2  | T2/T3 | A08 | 0     | 0.441 | 0.441        | 0.019   | 24.75 | 0.479   |
| T2KIN3  | T2/T3 | A09 | 0     | 0.437 | 0.437        | 0.019   | 24.75 | 0.475   |
| T2KIN3  | T2/T3 | A10 | 0     | 0.443 | 0.443        | 0.019   | 24.75 | 0.481   |
| T2KIN4  | T2/T3 | A11 | 0     | 0.042 | kleiner LLOQ | #VALUE! | 2.75  | #VALUE! |
| T2KIN4  | T2/T3 | A12 | 0     | 0.028 | kleiner LLOQ | #VALUE! | 2.75  | #VALUE! |
| 0       | T2/T3 | B01 | 0     | 0     | kleiner LLOQ | #VALUE! | 1     | #VALUE! |
| 0       | T2/T3 | B02 | 0     | 0     | kleiner LLOQ | #VALUE! | 1     | #VALUE! |
| 0       | T2/T3 | B03 | 0     | 0     | kleiner LLOQ | #VALUE! | 1     | #VALUE! |
| 0       | T2/T3 | B04 | 0     | 0     | kleiner LLOQ | #VALUE! | 1     | #VALUE! |
| T2KIS11 | T2/T3 | B05 | 0.618 | 0.567 | 0.567        | 0.025   | 24.75 | 0.628   |
| T2KIS11 | T2/T3 | B06 | 0.641 | 0.590 | 0.590        | 0.026   | 24.75 | 0.655   |
| T2KIS12 | T2/T3 | B07 | 0.569 | 0.518 | 0.518        | 0.023   | 24.75 | 0.569   |
| T2KIS12 | T2/T3 | B08 | 0.559 | 0.508 | 0.508        | 0.023   | 24.75 | 0.558   |
| T2KIS13 | T2/T3 | B09 | 0.545 | 0.494 | 0.494        | 0.022   | 24.75 | 0.541   |
| T2KIS13 | T2/T3 | B10 | 0.530 | 0.479 | 0.479        | 0.021   | 24.75 | 0.524   |
| T2KIS14 | T2/T3 | B11 | 0.074 | 0.023 | kleiner LLOQ | #VALUE! | 2.75  | #VALUE! |
| T2KIS14 | T2/T3 | B12 | 0.075 | 0.024 | kleiner LLOQ | #VALUE! | 2.75  | #VALUE! |
| 0       | T2/T3 | C01 | 0     | 0     | kleiner LLOQ | #VALUE! | 1     | #VALUE! |
| 0       | T2/T3 | C02 | 0     | 0     | kleiner LLOQ | #VALUE! | 1     | #VALUE! |
| 0       | T2/T3 | C03 | 0     | 0     | kleiner LLOQ | #VALUE! | 1     | #VALUE! |
| 0       | T2/T3 | C04 | 0     | 0     | kleiner LLOQ | #VALUE! | 1     | #VALUE! |
| T2KIS21 | T2/T3 | C05 | 0.509 | 0.458 | 0.458        | 0.020   | 24.75 | 0.499   |
| T2KIS21 | T2/T3 | C06 | 0.518 | 0.467 | 0.467        | 0.021   | 24.75 | 0.510   |
| T2KIS22 | T2/T3 | C07 | 0.600 | 0.550 | 0.550        | 0.025   | 24.75 | 0.607   |
| T2KIS22 | T2/T3 | C08 | 0.610 | 0.560 | 0.560        | 0.025   | 24.75 | 0.618   |
| T2KIS23 | T2/T3 | C09 | 0.451 | 0.400 | 0.400        | 0.017   | 24.75 | 0.430   |
| T2KIS23 | T2/T3 | C10 | 0.451 | 0.400 | 0.400        | 0.017   | 24.75 | 0.431   |
| T2KIS24 | T2/T3 | C11 | 0.079 | 0.028 | kleiner LLOQ | #VALUE! | 2.75  | #VALUE! |
| T2KIS24 | T2/T3 | C12 | 0.079 | 0.028 | kleiner LLOQ | #VALUE! | 2.75  | #VALUE! |
| 0       | T2/T3 | D01 | 0     | 0     | kleiner LLOQ | #VALUE! | 1     | #VALUE! |
| 0       | T2/T3 | D02 | 0     | 0     | kleiner LLOQ | #VALUE! | 1     | #VALUE! |
| 0       | T2/T3 | D03 | 0     | 0     | kleiner LLOQ | #VALUE! | 1     | #VALUE! |
| 0       | T2/T3 | D04 | 0     | 0     | kleiner LLOQ | #VALUE! | 1     | #VALUE! |
| T3KIN1  | T2/T3 | D05 | 0.374 | 0.324 | 0.324        | 0.014   | 16.5  | 0.227   |
| T3KIN1  | T2/T3 | D06 | 0.374 | 0.323 | 0.323        | 0.014   | 16.5  | 0.227   |
| T3KIN2  | T2/T3 | D07 | 0.407 | 0.356 | 0.356        | 0.015   | 16.5  | 0.253   |
| T3KIN2  | T2/T3 | D08 | 0.402 | 0.351 | 0.351        | 0.015   | 16.5  | 0.249   |
| T3KIN3  | T2/T3 | D09 | 0.280 | 0.229 | 0.229        | 0.009   | 16.5  | 0.153   |
| T3KIN3  | T2/T3 | D10 | 0.279 | 0.228 | 0.228        | 0.009   | 16.5  | 0.152   |
| T3KIN4  | T2/T3 | D11 | 0.065 | 0.014 | kleiner LLOQ | #VALUE! | 2.75  | #VALUE! |
| T3KIN4  | T2/T3 | D12 | 0.066 | 0.015 | kleiner LLOQ | #VALUE! | 2.75  | #VALUE! |

Plate: T2/T3

|   |   |   |   |   |       |       |       |       |       |       |       |       |
|---|---|---|---|---|-------|-------|-------|-------|-------|-------|-------|-------|
|   | 1 | 2 | 3 | 4 | 5     | 6     | 7     | 8     | 9     | 10    | 11    | 12    |
| A |   |   |   |   | 0.506 | 0.519 | 0.476 | 0.492 | 0.488 | 0.493 | 0.093 | 0.079 |
| B |   |   |   |   | 0.618 | 0.641 | 0.569 | 0.559 | 0.545 | 0.530 | 0.074 | 0.075 |
| C |   |   |   |   | 0.509 | 0.518 | 0.600 | 0.610 | 0.451 | 0.451 | 0.079 | 0.079 |
| D |   |   |   |   | 0.374 | 0.374 | 0.407 | 0.402 | 0.280 | 0.279 | 0.065 | 0.066 |
| E |   |   |   |   | 0.169 | 0.170 | 0.393 | 0.405 | 0.376 | 0.386 |       |       |
| F |   |   |   |   | 0.293 | 0.279 | 0.365 | 0.371 | 0.193 | 0.200 | 0.062 | 0.061 |
| G |   |   |   |   |       |       | 0.050 | 0.050 | 0.048 | 0.050 | 0.050 | 0.050 |
| H |   |   |   |   |       |       | 0.050 | 0.049 | 0.051 | 0.050 | 0.050 | 0.050 |

Plattenbelegung

|   |   |   |   |   |         |         |              |              |              |              |              |              |
|---|---|---|---|---|---------|---------|--------------|--------------|--------------|--------------|--------------|--------------|
|   | 1 | 2 | 3 | 4 | 5       | 6       | 7            | 8            | 9            | 10           | 11           | 12           |
| A |   |   |   |   | T2KIN1  | T2KIN1  | T2KIN2       | T2KIN2       | T2KIN3       | T2KIN3       | T2KIN4       | T2KIN4       |
| B |   |   |   |   | T2KIS11 | T2KIS11 | T2KIS12      | T2KIS12      | T2KIS13      | T2KIS13      | T2KIS14      | T2KIS14      |
| C |   |   |   |   | T2KIS21 | T2KIS21 | T2KIS22      | T2KIS22      | T2KIS23      | T2KIS23      | T2KIS24      | T2KIS24      |
| D |   |   |   |   | T3KIN1  | T3KIN1  | T3KIN2       | T3KIN2       | T3KIN3       | T3KIN3       | T3KIN4       | T3KIN4       |
| E |   |   |   |   | T3KIS11 | T3KIS11 | T3KIS12      | T3KIS12      | T3KIS13      | T3KIS13      |              |              |
| F |   |   |   |   | T3KIS21 | T3KIS21 | T3KIS22      | T3KIS22      | T3KIS23      | T3KIS23      | T3KIS24      | T3KIS24      |
| G |   |   |   |   |         |         | Blank PEG    | Blank PEG    | Blank PEG    | Blank PEG    | Blank PEG    | Blank PEG    |
| H |   |   |   |   |         |         | Blank no PEG | Blank no PEG | Blank no PEG | Blank no PEG | Blank no PEG | Blank no PEG |

T2 dil.9\*dil.2,75=dil.24,75  
T3 dil.6\*dil.2,75=dil.16,5

Comment:

Probe von T3KIS14 fehlt, daher nicht gemessen

Date Operator Date Control

|              |       |     |       |         |              |         |      |         |
|--------------|-------|-----|-------|---------|--------------|---------|------|---------|
| 0            | T2/T3 | E01 | 0     | 0       | kleiner LLOQ | #VALUE! | 1    | #VALUE! |
| 0            | T2/T3 | E02 | 0     | 0       | kleiner LLOQ | #VALUE! | 1    | #VALUE! |
| 0            | T2/T3 | E03 | 0     | 0       | kleiner LLOQ | #VALUE! | 1    | #VALUE! |
| 0            | T2/T3 | E04 | 0     | 0       | kleiner LLOQ | #VALUE! | 1    | #VALUE! |
| T3KIS11      | T2/T3 | E05 | 0.169 | 0.118   | kleiner LLOQ | #VALUE! | 16.5 | #VALUE! |
| T3KIS11      | T2/T3 | E06 | 0.170 | 0.119   | kleiner LLOQ | #VALUE! | 16.5 | #VALUE! |
| T3KIS12      | T2/T3 | E07 | 0.393 | 0.342   | 0.342        | 0.015   | 16.5 | 0.242   |
| T3KIS12      | T2/T3 | E08 | 0.405 | 0.354   | 0.354        | 0.015   | 16.5 | 0.251   |
| T3KIS13      | T2/T3 | E09 | 0.376 | 0.325   | 0.325        | 0.014   | 16.5 | 0.228   |
| T3KIS13      | T2/T3 | E10 | 0.386 | 0.335   | 0.335        | 0.014   | 16.5 | 0.237   |
| 0            | T2/T3 | E11 | 0     | 0       | kleiner LLOQ | #VALUE! | 1    | #VALUE! |
| 0            | T2/T3 | E12 | 0     | #VALUE! | #VALUE!      | #VALUE! | 1    | #VALUE! |
| 0            | T2/T3 | F01 | 0     | 0       | kleiner LLOQ | #VALUE! | 1    | #VALUE! |
| 0            | T2/T3 | F02 | 0     | 0       | kleiner LLOQ | #VALUE! | 1    | #VALUE! |
| 0            | T2/T3 | F03 | 0     | 0       | kleiner LLOQ | #VALUE! | 1    | #VALUE! |
| 0            | T2/T3 | F04 | 0     | 0       | kleiner LLOQ | #VALUE! | 1    | #VALUE! |
| T3KIS21      | T2/T3 | F05 | 0.293 | 0.242   | 0.242        | 0.010   | 16.5 | 0.163   |
| T3KIS21      | T2/T3 | F06 | 0.279 | 0.228   | 0.228        | 0.009   | 16.5 | 0.152   |
| T3KIS22      | T2/T3 | F07 | 0.365 | 0.314   | 0.314        | 0.013   | 16.5 | 0.220   |
| T3KIS22      | T2/T3 | F08 | 0.371 | 0.320   | 0.320        | 0.014   | 16.5 | 0.224   |
| T3KIS23      | T2/T3 | F09 | 0.193 | 0.142   | kleiner LLOQ | #VALUE! | 16.5 | #VALUE! |
| T3KIS23      | T2/T3 | F10 | 0.200 | 0.149   | kleiner LLOQ | #VALUE! | 16.5 | #VALUE! |
| T3KIS24      | T2/T3 | F11 | 0.062 | 0.012   | kleiner LLOQ | #VALUE! | 2.75 | #VALUE! |
| T3KIS24      | T2/T3 | F12 | 0.061 | 0.010   | kleiner LLOQ | #VALUE! | 2.75 | #VALUE! |
| 0            | T2/T3 | G01 | 0     | 0       | kleiner LLOQ | #VALUE! | 1    | #VALUE! |
| 0            | T2/T3 | G02 | 0     | 0       | kleiner LLOQ | #VALUE! | 1    | #VALUE! |
| 0            | T2/T3 | G03 | 0     | 0       | kleiner LLOQ | #VALUE! | 1    | #VALUE! |
| 0            | T2/T3 | G04 | 0     | 0       | kleiner LLOQ | #VALUE! | 1    | #VALUE! |
| 0            | T2/T3 | G05 | 0     | 0       | kleiner LLOQ | #VALUE! | 1    | #VALUE! |
| 0            | T2/T3 | G06 | 0     | 0       | kleiner LLOQ | #VALUE! | 1    | #VALUE! |
| Blank PEG    | T2/T3 | G07 | 0     | 0       | kleiner LLOQ | #VALUE! | 2.75 | #VALUE! |
| Blank PEG    | T2/T3 | G08 | 0     | 0       | kleiner LLOQ | #VALUE! | 2.75 | #VALUE! |
| Blank PEG    | T2/T3 | G09 | 0     | 0       | kleiner LLOQ | #VALUE! | 2.75 | #VALUE! |
| Blank PEG    | T2/T3 | G10 | 0     | 0       | kleiner LLOQ | #VALUE! | 2.75 | #VALUE! |
| Blank PEG    | T2/T3 | G11 | 0     | 0       | kleiner LLOQ | #VALUE! | 2.75 | #VALUE! |
| Blank PEG    | T2/T3 | G12 | 0     | 0       | kleiner LLOQ | #VALUE! | 2.75 | #VALUE! |
| 0            | T2/T3 | H01 | 0     | 0       | kleiner LLOQ | #VALUE! | 1    | #VALUE! |
| 0            | T2/T3 | H02 | 0     | 0       | kleiner LLOQ | #VALUE! | 1    | #VALUE! |
| 0            | T2/T3 | H03 | 0     | 0       | kleiner LLOQ | #VALUE! | 1    | #VALUE! |
| 0            | T2/T3 | H04 | 0     | 0       | kleiner LLOQ | #VALUE! | 1    | #VALUE! |
| 0            | T2/T3 | H05 | 0     | 0       | kleiner LLOQ | #VALUE! | 1    | #VALUE! |
| 0            | T2/T3 | H06 | 0     | 0       | kleiner LLOQ | #VALUE! | 1    | #VALUE! |
| Blank no PEG | T2/T3 | H07 | 0     | 0       | kleiner LLOQ | #VALUE! | 2.75 | #VALUE! |
| Blank no PEG | T2/T3 | H08 | 0     | 0       | kleiner LLOQ | #VALUE! | 2.75 | #VALUE! |
| Blank no PEG | T2/T3 | H09 | 0     | 0       | kleiner LLOQ | #VALUE! | 2.75 | #VALUE! |
| Blank no PEG | T2/T3 | H10 | 0     | 0       | kleiner LLOQ | #VALUE! | 2.75 | #VALUE! |
| Blank no PEG | T2/T3 | H11 | 0     | 0       | kleiner LLOQ | #VALUE! | 2.75 | #VALUE! |
| Blank no PEG | T2/T3 | H12 | 0     | 0       | kleiner LLOQ | #VALUE! | 2.75 | #VALUE! |

|         |       |     |       |       |              |         |      |         |
|---------|-------|-----|-------|-------|--------------|---------|------|---------|
| 0       | T4/T5 | A01 | 0     | 0     | kleiner LLOQ | #VALUE! | 1    | #VALUE! |
| 0       | T4/T5 | A02 | 0     | 0     | kleiner LLOQ | #VALUE! | 1    | #VALUE! |
| 0       | T4/T5 | A03 | 0     | 0     | kleiner LLOQ | #VALUE! | 1    | #VALUE! |
| 0       | T4/T5 | A04 | 0     | 0     | kleiner LLOQ | #VALUE! | 1    | #VALUE! |
| T4KIIN1 | T4/T5 | A05 | 0.447 | 0.396 | 0.396        | 0.017   | 8.25 | 0.142   |
| T4KIIN1 | T4/T5 | A06 | 0.456 | 0.405 | 0.405        | 0.018   | 8.25 | 0.146   |
| T4KIIN2 | T4/T5 | A07 | 0.457 | 0.407 | 0.407        | 0.018   | 8.25 | 0.146   |
| T4KIIN2 | T4/T5 | A08 | 0.463 | 0.412 | 0.412        | 0.018   | 8.25 | 0.148   |
| T4KIIN3 | T4/T5 | A09 | 0.586 | 0.536 | 0.536        | 0.024   | 2.75 | 0.066   |
| T4KIIN3 | T4/T5 | A10 | 0.600 | 0.549 | 0.549        | 0.025   | 2.75 | 0.067   |
| T4KIIN4 | T4/T5 | A11 | 0.072 | 0.021 | kleiner LLOQ | #VALUE! | 2.75 | #VALUE! |
| T4KIIN4 | T4/T5 | A12 | 0.072 | 0.021 | kleiner LLOQ | #VALUE! | 2.75 | #VALUE! |
| 0       | T4/T5 | B01 | 0     | 0     | kleiner LLOQ | #VALUE! | 1    | #VALUE! |
| 0       | T4/T5 | B02 | 0     | 0     | kleiner LLOQ | #VALUE! | 1    | #VALUE! |
| 0       | T4/T5 | B03 | 0     | 0     | kleiner LLOQ | #VALUE! | 1    | #VALUE! |
| 0       | T4/T5 | B04 | 0     | 0     | kleiner LLOQ | #VALUE! | 1    | #VALUE! |
| T4KIS11 | T4/T5 | B05 | 0.284 | 0.233 | 0.233        | 0.009   | 8.25 | 0.078   |
| T4KIS11 | T4/T5 | B06 | 0.281 | 0.230 | 0.230        | 0.009   | 8.25 | 0.077   |
| T4KIS12 | T4/T5 | B07 | 0.290 | 0.239 | 0.239        | 0.010   | 2.75 | 0.027   |
| T4KIS12 | T4/T5 | B08 | 0.292 | 0.241 | 0.241        | 0.010   | 2.75 | 0.027   |
| T4KIS13 | T4/T5 | B09 | 0.692 | 0.641 | 0.641        | 0.029   | 2.75 | 0.079   |
| T4KIS13 | T4/T5 | B10 | 0.864 | 0.813 | 0.813        | 0.037   | 2.75 | 0.102   |
| T4KIS14 | T4/T5 | B11 | 0.065 | 0.014 | kleiner LLOQ | #VALUE! | 2.75 | #VALUE! |
| T4KIS14 | T4/T5 | B12 | 0.065 | 0.014 | kleiner LLOQ | #VALUE! | 2.75 | #VALUE! |
| 0       | T4/T5 | C01 | 0     | 0     | kleiner LLOQ | #VALUE! | 1    | #VALUE! |
| 0       | T4/T5 | C02 | 0     | 0     | kleiner LLOQ | #VALUE! | 1    | #VALUE! |
| 0       | T4/T5 | C03 | 0     | 0     | kleiner LLOQ | #VALUE! | 1    | #VALUE! |
| 0       | T4/T5 | C04 | 0     | 0     | kleiner LLOQ | #VALUE! | 1    | #VALUE! |
| T4KIS21 | T4/T5 | C05 | 0.415 | 0.364 | 0.364        | 0.016   | 2.75 | 0.043   |
| T4KIS21 | T4/T5 | C06 | 0.429 | 0.379 | 0.379        | 0.016   | 2.75 | 0.045   |
| T4KIS22 | T4/T5 | C07 | 0.475 | 0.424 | 0.424        | 0.019   | 2.75 | 0.051   |
| T4KIS22 | T4/T5 | C08 | 0.532 | 0.481 | 0.481        | 0.021   | 2.75 | 0.058   |
| T4KIS23 | T4/T5 | C09 | 0.663 | 0.612 | 0.612        | 0.027   | 2.75 | 0.076   |
| T4KIS23 | T4/T5 | C10 | 0.665 | 0.614 | 0.614        | 0.028   | 2.75 | 0.076   |
| T4KIS24 | T4/T5 | C11 | 0.061 | 0.010 | kleiner LLOQ | #VALUE! | 2.75 | #VALUE! |
| T4KIS24 | T4/T5 | C12 | 0.061 | 0.010 | kleiner LLOQ | #VALUE! | 2.75 | #VALUE! |
| 0       | T4/T5 | D01 | 0     | 0     | kleiner LLOQ | #VALUE! | 1    | #VALUE! |
| 0       | T4/T5 | D02 | 0     | 0     | kleiner LLOQ | #VALUE! | 1    | #VALUE! |
| 0       | T4/T5 | D03 | 0     | 0     | kleiner LLOQ | #VALUE! | 1    | #VALUE! |
| 0       | T4/T5 | D04 | 0     | 0     | kleiner LLOQ | #VALUE! | 1    | #VALUE! |
| T5KIIN1 | T4/T5 | D05 | 0     | 0.342 | 0.342        | 0.015   | 2.75 | 0.040   |
| T5KIIN1 | T4/T5 | D06 | 0     | 0.333 | 0.333        | 0.014   | 2.75 | 0.039   |
| T5KIIN2 | T4/T5 | D07 | 1     | 0.561 | 0.561        | 0.025   | 2.75 | 0.069   |
| T5KIIN2 | T4/T5 | D08 | 1     | 0.556 | 0.556        | 0.025   | 2.75 | 0.068   |
| T5KIIN3 | T4/T5 | D09 | 0     | 0.308 | 0.308        | 0.013   | 2.75 | 0.036   |

Plate: T4/T5

|   |   |   |   |   |       |       |       |       |       |       |       |       |
|---|---|---|---|---|-------|-------|-------|-------|-------|-------|-------|-------|
|   | 1 | 2 | 3 | 4 | 5     | 6     | 7     | 8     | 9     | 10    | 11    | 12    |
| A |   |   |   |   | 0.447 | 0.456 | 0.457 | 0.463 | 0.586 | 0.600 | 0.072 | 0.072 |
| B |   |   |   |   | 0.284 | 0.281 | 0.290 | 0.292 | 0.692 | 0.864 | 0.065 | 0.065 |
| C |   |   |   |   | 0.415 | 0.429 | 0.475 | 0.532 | 0.663 | 0.665 | 0.061 | 0.061 |
| D |   |   |   |   | 0.393 | 0.384 | 0.612 | 0.607 | 0.359 | 0.425 | 0.059 | 0.058 |
| E |   |   |   |   | 0.184 | 0.278 | 0.529 | 0.715 | 0.218 | 0.232 | 0.059 | 0.059 |
| F |   |   |   |   | 0.496 | 0.489 | 0.103 | 0.201 | 0.106 | 0.120 | 0.054 | 0.054 |
| G |   |   |   |   |       |       | 0.050 | 0.050 | 0.051 | 0.050 | 0.050 | 0.050 |
| H |   |   |   |   |       |       | 0.050 | 0.050 | 0.050 | 0.048 | 0.049 | 0.049 |

Plattenbelegung

|   |   |   |   |   |         |         |              |              |              |              |              |              |
|---|---|---|---|---|---------|---------|--------------|--------------|--------------|--------------|--------------|--------------|
|   | 1 | 2 | 3 | 4 | 5       | 6       | 7            | 8            | 9            | 10           | 11           | 12           |
| A |   |   |   |   | T4KIIN1 | T4KIIN1 | T4KIIN2      | T4KIIN2      | T4KIIN3      | T4KIIN3      | T4KIIN4      | T4KIIN4      |
| B |   |   |   |   | T4KIS11 | T4KIS11 | T4KIS12      | T4KIS12      | T4KIS13      | T4KIS13      | T4KIS14      | T4KIS14      |
| C |   |   |   |   | T4KIS21 | T4KIS21 | T4KIS22      | T4KIS22      | T4KIS23      | T4KIS23      | T4KIS24      | T4KIS24      |
| D |   |   |   |   | T5KIIN1 | T5KIIN1 | T5KIIN2      | T5KIIN2      | T5KIIN3      | T5KIIN3      | T5KIIN4      | T5KIIN4      |
| E |   |   |   |   | T5KIS11 | T5KIS11 | T5KIS12      | T5KIS12      | T5KIS13      | T5KIS13      | T5KIS14      | T5KIS14      |
| F |   |   |   |   | T5KIS21 | T5KIS21 | T5KIS22      | T5KIS22      | T5KIS23      | T5KIS23      | T5KIS24      | T5KIS24      |
| G |   |   |   |   |         |         | Blank PEG    | Blank PEG    | Blank PEG    | Blank PEG    | Blank PEG    | Blank PEG    |
| H |   |   |   |   |         |         | Blank no PEG | Blank no PEG | Blank no PEG | Blank no PEG | Blank no PEG | Blank no PEG |

dil.3\*dil2,75=dil.8,25

Comment:

Date Operator Date Control

|              |       |     |   |       |              |         |      |         |
|--------------|-------|-----|---|-------|--------------|---------|------|---------|
| T5KIIN3      | T4/T5 | D10 | 0 | 0.374 | 0.374        | 0.016   | 2,75 | 0.045   |
| T5KIIN4      | T4/T5 | D11 | 0 | 0.008 | kleiner LLOQ | #VALUE! | 2,75 | #VALUE! |
| T5KIIN4      | T4/T5 | D12 | 0 | 0.007 | kleiner LLOQ | #VALUE! | 2,75 | #VALUE! |
| 0            | T4/T5 | E01 | 0 | 0     | kleiner LLOQ | #VALUE! | 1    | #VALUE! |
| 0            | T4/T5 | E02 | 0 | 0     | kleiner LLOQ | #VALUE! | 1    | #VALUE! |
| 0            | T4/T5 | E03 | 0 | 0     | kleiner LLOQ | #VALUE! | 1    | #VALUE! |
| 0            | T4/T5 | E04 | 0 | 0     | kleiner LLOQ | #VALUE! | 1    | #VALUE! |
| T5KIS11      | T4/T5 | E05 | 0 | 0.133 | kleiner LLOQ | #VALUE! | 2,75 | #VALUE! |
| T5KIS11      | T4/T5 | E06 | 0 | 0.227 | 0.227        | 0.009   | 2,75 | 0.025   |
| T5KIS12      | T4/T5 | E07 | 1 | 0.478 | 0.478        | 0.021   | 2,75 | 0.058   |
| T5KIS12      | T4/T5 | E08 | 1 | 0.664 | 0.664        | 0.030   | 2,75 | 0.082   |
| T5KIS13      | T4/T5 | E09 | 0 | 0.167 | kleiner LLOQ | #VALUE! | 2,75 | #VALUE! |
| T5KIS13      | T4/T5 | E10 | 0 | 0.181 | 0.181        | 0.007   | 2,75 | 0.019   |
| T5KIS14      | T4/T5 | E11 | 0 | 0.008 | kleiner LLOQ | #VALUE! | 2,75 | #VALUE! |
| T5KIS14      | T4/T5 | E12 | 0 | 0.008 | kleiner LLOQ | #VALUE! | 2,75 | #VALUE! |
| 0            | T4/T5 | F01 | 0 | 0     | kleiner LLOQ | #VALUE! | 1    | #VALUE! |
| 0            | T4/T5 | F02 | 0 | 0     | kleiner LLOQ | #VALUE! | 1    | #VALUE! |
| 0            | T4/T5 | F03 | 0 | 0     | kleiner LLOQ | #VALUE! | 1    | #VALUE! |
| 0            | T4/T5 | F04 | 0 | 0     | kleiner LLOQ | #VALUE! | 1    | #VALUE! |
| T5KIS21      | T4/T5 | F05 | 0 | 0.445 | 0.445        | 0.020   | 2,75 | 0.054   |
| T5KIS21      | T4/T5 | F06 | 0 | 0.438 | 0.438        | 0.019   | 2,75 | 0.053   |
| T5KIS22      | T4/T5 | F07 | 0 | 0.052 | kleiner LLOQ | #VALUE! | 2,75 | #VALUE! |
| T5KIS22      | T4/T5 | F08 | 0 | 0.150 | kleiner LLOQ | #VALUE! | 2,75 | #VALUE! |
| T5KIS23      | T4/T5 | F09 | 0 | 0.055 | kleiner LLOQ | #VALUE! | 2,75 | #VALUE! |
| T5KIS23      | T4/T5 | F10 | 0 | 0.069 | kleiner LLOQ | #VALUE! | 2,75 | #VALUE! |
| T5KIS24      | T4/T5 | F11 | 0 | 0.003 | kleiner LLOQ | #VALUE! | 2,75 | #VALUE! |
| T5KIS24      | T4/T5 | F12 | 0 | 0.003 | kleiner LLOQ | #VALUE! | 2,75 | #VALUE! |
| 0            | T4/T5 | G01 | 0 | 0     | kleiner LLOQ | #VALUE! | 1    | #VALUE! |
| 0            | T4/T5 | G02 | 0 | 0     | kleiner LLOQ | #VALUE! | 1    | #VALUE! |
| 0            | T4/T5 | G03 | 0 | 0     | kleiner LLOQ | #VALUE! | 1    | #VALUE! |
| 0            | T4/T5 | G04 | 0 | 0     | kleiner LLOQ | #VALUE! | 1    | #VALUE! |
| 0            | T4/T5 | G05 | 0 | 0     | kleiner LLOQ | #VALUE! | 1    | #VALUE! |
| 0            | T4/T5 | G06 | 0 | 0     | kleiner LLOQ | #VALUE! | 1    | #VALUE! |
| Blank PEG    | T4/T5 | G07 | 0 | 0     | kleiner LLOQ | #VALUE! | 2,75 | #VALUE! |
| Blank PEG    | T4/T5 | G08 | 0 | 0     | kleiner LLOQ | #VALUE! | 2,75 | #VALUE! |
| Blank PEG    | T4/T5 | G09 | 0 | 0     | kleiner LLOQ | #VALUE! | 2,75 | #VALUE! |
| Blank PEG    | T4/T5 | G10 | 0 | 0     | kleiner LLOQ | #VALUE! | 2,75 | #VALUE! |
| Blank PEG    | T4/T5 | G11 | 0 | 0     | kleiner LLOQ | #VALUE! | 2,75 | #VALUE! |
| Blank PEG    | T4/T5 | G12 | 0 | 0     | kleiner LLOQ | #VALUE! | 2,75 | #VALUE! |
| 0            | T4/T5 | H01 | 0 | 0     | kleiner LLOQ | #VALUE! | 1    | #VALUE! |
| 0            | T4/T5 | H02 | 0 | 0     | kleiner LLOQ | #VALUE! | 1    | #VALUE! |
| 0            | T4/T5 | H03 | 0 | 0     | kleiner LLOQ | #VALUE! | 1    | #VALUE! |
| 0            | T4/T5 | H04 | 0 | 0     | kleiner LLOQ | #VALUE! | 1    | #VALUE! |
| 0            | T4/T5 | H05 | 0 | 0     | kleiner LLOQ | #VALUE! | 1    | #VALUE! |
| 0            | T4/T5 | H06 | 0 | 0     | kleiner LLOQ | #VALUE! | 1    | #VALUE! |
| Blank no PEG | T4/T5 | H07 | 0 | 0     | kleiner LLOQ | #VALUE! | 2,75 | #VALUE! |
| Blank no PEG | T4/T5 | H08 | 0 | 0     | kleiner LLOQ | #VALUE! | 2,75 | #VALUE! |
| Blank no PEG | T4/T5 | H09 | 0 | 0     | kleiner LLOQ | #VALUE! | 2,75 | #VALUE! |
| Blank no PEG | T4/T5 | H10 | 0 | 0     | kleiner LLOQ | #VALUE! | 2,75 | #VALUE! |
| Blank no PEG | T4/T5 | H11 | 0 | 0     | kleiner LLOQ | #VALUE! | 2,75 | #VALUE! |
| Blank no PEG | T4/T5 | H12 | 0 | 0     | kleiner LLOQ | #VALUE! | 2,75 | #VALUE! |

|         |       |     |       |       |              |         |      |         |
|---------|-------|-----|-------|-------|--------------|---------|------|---------|
| 0       | T6/T7 | A01 | 0     | 0     | kleiner LLOQ | #VALUE! | 1    | #VALUE! |
| 0       | T6/T7 | A02 | 0     | 0     | kleiner LLOQ | #VALUE! | 1    | #VALUE! |
| 0       | T6/T7 | A03 | 0     | 0     | kleiner LLOQ | #VALUE! | 1    | #VALUE! |
| 0       | T6/T7 | A04 | 0     | 0     | kleiner LLOQ | #VALUE! | 1    | #VALUE! |
| T6KIN1  | T6/T7 | A05 | 1     | 0.461 | 0.461        | 0.020   | 2.75 | 0.056   |
| T6KIN1  | T6/T7 | A06 | 0     | 0.417 | 0.417        | 0.018   | 2.75 | 0.050   |
| T6KIN2  | T6/T7 | A07 | 0     | 0.438 | 0.438        | 0.019   | 2.75 | 0.053   |
| T6KIN2  | T6/T7 | A08 | 1     | 0.496 | 0.496        | 0.022   | 2.75 | 0.060   |
| T6KIN3  | T6/T7 | A09 | 0     | 0.141 | kleiner LLOQ | #VALUE! | 2.75 | #VALUE! |
| T6KIN3  | T6/T7 | A10 | 0     | 0.154 | kleiner LLOQ | #VALUE! | 2.75 | #VALUE! |
| T6KIN4  | T6/T7 | A11 | 0     | 0.012 | kleiner LLOQ | #VALUE! | 2.75 | #VALUE! |
| T6KIN4  | T6/T7 | A12 | 0     | 0.019 | kleiner LLOQ | #VALUE! | 2.75 | #VALUE! |
| 0       | T6/T7 | B01 | 0     | 0     | kleiner LLOQ | #VALUE! | 1    | #VALUE! |
| 0       | T6/T7 | B02 | 0     | 0     | kleiner LLOQ | #VALUE! | 1    | #VALUE! |
| 0       | T6/T7 | B03 | 0     | 0     | kleiner LLOQ | #VALUE! | 1    | #VALUE! |
| 0       | T6/T7 | B04 | 0     | 0     | kleiner LLOQ | #VALUE! | 1    | #VALUE! |
| T6KIS11 | T6/T7 | B05 | 0.154 | 0.103 | kleiner LLOQ | #VALUE! | 2.75 | #VALUE! |
| T6KIS11 | T6/T7 | B06 | 0.226 | 0.175 | 0.175        | 0.007   | 2.75 | 0.018   |
| T6KIS12 | T6/T7 | B07 | 0.460 | 0.409 | 0.409        | 0.018   | 2.75 | 0.049   |
| T6KIS12 | T6/T7 | B08 | 0.263 | 0.212 | 0.212        | 0.008   | 2.75 | 0.023   |
| T6KIS13 | T6/T7 | B09 | 0.214 | 0.163 | kleiner LLOQ | #VALUE! | 2.75 | #VALUE! |
| T6KIS13 | T6/T7 | B10 | 0.401 | 0.350 | 0.350        | 0.015   | 2.75 | 0.041   |
| T6KIS14 | T6/T7 | B11 | 0.060 | 0.009 | kleiner LLOQ | #VALUE! | 2.75 | #VALUE! |
| T6KIS14 | T6/T7 | B12 | 0.059 | 0.009 | kleiner LLOQ | #VALUE! | 2.75 | #VALUE! |
| 0       | T6/T7 | C01 | 0     | 0     | kleiner LLOQ | #VALUE! | 1    | #VALUE! |
| 0       | T6/T7 | C02 | 0     | 0     | kleiner LLOQ | #VALUE! | 1    | #VALUE! |
| 0       | T6/T7 | C03 | 0     | 0     | kleiner LLOQ | #VALUE! | 1    | #VALUE! |
| 0       | T6/T7 | C04 | 0     | 0     | kleiner LLOQ | #VALUE! | 1    | #VALUE! |
| T6KIS21 | T6/T7 | C05 | 0     | 0.345 | 0.345        | 0.015   | 2.75 | 0.041   |
| T6KIS21 | T6/T7 | C06 | 0     | 0.360 | 0.360        | 0.015   | 2.75 | 0.043   |
| T6KIS22 | T6/T7 | C07 | 0     | 0.115 | kleiner LLOQ | #VALUE! | 2.75 | #VALUE! |
| T6KIS22 | T6/T7 | C08 | 0     | 0.121 | kleiner LLOQ | #VALUE! | 2.75 | #VALUE! |
| T6KIS23 | T6/T7 | C09 | 0     | 0.077 | kleiner LLOQ | #VALUE! | 2.75 | #VALUE! |
| T6KIS23 | T6/T7 | C10 | 0     | 0.084 | kleiner LLOQ | #VALUE! | 2.75 | #VALUE! |
| T6KIS24 | T6/T7 | C11 | 0     | 0.005 | kleiner LLOQ | #VALUE! | 2.75 | #VALUE! |
| T6KIS24 | T6/T7 | C12 | 0     | 0.009 | kleiner LLOQ | #VALUE! | 2.75 | #VALUE! |
| 0       | T6/T7 | D01 | 0     | 0     | kleiner LLOQ | #VALUE! | 1    | #VALUE! |
| 0       | T6/T7 | D02 | 0     | 0     | kleiner LLOQ | #VALUE! | 1    | #VALUE! |
| 0       | T6/T7 | D03 | 0     | 0     | kleiner LLOQ | #VALUE! | 1    | #VALUE! |
| 0       | T6/T7 | D04 | 0     | 0     | kleiner LLOQ | #VALUE! | 1    | #VALUE! |
| T7KIN1  | T6/T7 | D05 | 0.443 | 0.392 | 0.392        | 0.017   | 2.75 | 0.047   |
| T7KIN1  | T6/T7 | D06 | 0.450 | 0.399 | 0.399        | 0.017   | 2.75 | 0.048   |
| T7KIN2  | T6/T7 | D07 | 0.369 | 0.319 | 0.319        | 0.014   | 2.75 | 0.037   |
| T7KIN2  | T6/T7 | D08 | 0.418 | 0.367 | 0.367        | 0.016   | 2.75 | 0.043   |
| T7KIN3  | T6/T7 | D09 | 0.111 | 0.060 | kleiner LLOQ | #VALUE! | 2.75 | #VALUE! |
| T7KIN3  | T6/T7 | D10 | 0.107 | 0.056 | kleiner LLOQ | #VALUE! | 2.75 | #VALUE! |
| T7KIN4  | T6/T7 | D11 | 0.057 | 0.006 | kleiner LLOQ | #VALUE! | 2.75 | #VALUE! |

Plate: T6/T7

|   | 1 | 2 | 3 | 4 | 5     | 6     | 7     | 8     | 9     | 10    | 11    | 12    |
|---|---|---|---|---|-------|-------|-------|-------|-------|-------|-------|-------|
| A |   |   |   |   | 0.512 | 0.468 | 0.489 | 0.547 | 0.192 | 0.205 | 0.062 | 0.070 |
| B |   |   |   |   | 0.154 | 0.226 | 0.460 | 0.263 | 0.214 | 0.401 | 0.060 | 0.059 |
| C |   |   |   |   | 0.396 | 0.411 | 0.166 | 0.172 | 0.128 | 0.135 | 0.056 | 0.060 |
| D |   |   |   |   | 0.443 | 0.450 | 0.369 | 0.418 | 0.111 | 0.107 | 0.057 | 0.060 |
| E |   |   |   |   | 0.064 | 0.062 | 0.091 | 0.158 | 0.098 | 0.156 | 0.057 | 0.058 |
| F |   |   |   |   | 0.243 | 0.304 | 0.097 | 0.142 | 0.139 | 0.137 | 0.055 | 0.054 |
| G |   |   |   |   |       |       | 0.049 | 0.052 | 0.052 | 0.051 | 0.052 | 0.051 |
| H |   |   |   |   |       |       | 0.050 | 0.050 | 0.050 | 0.045 | 0.051 | 0.050 |

Plattenbelegung

|   | 1 | 2 | 3 | 4 | 5       | 6       | 7            | 8            | 9            | 10           | 11           | 12           |
|---|---|---|---|---|---------|---------|--------------|--------------|--------------|--------------|--------------|--------------|
| A |   |   |   |   | T6KIN1  | T6KIN1  | T6KIN2       | T6KIN2       | T6KIN3       | T6KIN3       | T6KIN4       | T6KIN4       |
| B |   |   |   |   | T6KIS11 | T6KIS11 | T6KIS12      | T6KIS12      | T6KIS13      | T6KIS13      | T6KIS14      | T6KIS14      |
| C |   |   |   |   | T6KIS21 | T6KIS21 | T6KIS22      | T6KIS22      | T6KIS23      | T6KIS23      | T6KIS24      | T6KIS24      |
| D |   |   |   |   | T7KIN1  | T7KIN1  | T7KIN2       | T7KIN2       | T7KIN3       | T7KIN3       | T7KIN4       | T7KIN4       |
| E |   |   |   |   | T7KIS11 | T7KIS11 | T7KIS12      | T7KIS12      | T7KIS13      | T7KIS13      | T7KIS14      | T7KIS14      |
| F |   |   |   |   | T7KIS21 | T7KIS21 | T7KIS22      | T7KIS22      | T7KIS23      | T7KIS23      | T7KIS24      | T7KIS24      |
| G |   |   |   |   |         |         | Blank PEG    | Blank PEG    | Blank PEG    | Blank PEG    | Blank PEG    | Blank PEG    |
| H |   |   |   |   |         |         | Blank no PEG | Blank no PEG | Blank no PEG | Blank no PEG | Blank no PEG | Blank no PEG |

Comment:

Date Operator

Date Control



|              |       |     |       |       |              |         |      |         |
|--------------|-------|-----|-------|-------|--------------|---------|------|---------|
| T7KIIN4      | T6/T7 | D12 | 0.060 | 0.009 | kleiner LLOQ | #VALUE! | 2,75 | #VALUE! |
| 0            | T6/T7 | E01 | 0     | 0     | kleiner LLOQ | #VALUE! | 1    | #VALUE! |
| 0            | T6/T7 | E02 | 0     | 0     | kleiner LLOQ | #VALUE! | 1    | #VALUE! |
| 0            | T6/T7 | E03 | 0     | 0     | kleiner LLOQ | #VALUE! | 1    | #VALUE! |
| 0            | T6/T7 | E04 | 0     | 0     | kleiner LLOQ | #VALUE! | 1    | #VALUE! |
| T7KIS11      | T6/T7 | E05 | 0.06  | 0.01  | kleiner LLOQ | #VALUE! | 2,75 | #VALUE! |
| T7KIS11      | T6/T7 | E06 | 0.06  | 0.01  | kleiner LLOQ | #VALUE! | 2,75 | #VALUE! |
| T7KIS12      | T6/T7 | E07 | 0.09  | 0.04  | kleiner LLOQ | #VALUE! | 2,75 | #VALUE! |
| T7KIS12      | T6/T7 | E08 | 0.16  | 0.11  | kleiner LLOQ | #VALUE! | 2,75 | #VALUE! |
| T7KIS13      | T6/T7 | E09 | 0.10  | 0.05  | kleiner LLOQ | #VALUE! | 2,75 | #VALUE! |
| T7KIS13      | T6/T7 | E10 | 0.18  | 0.10  | kleiner LLOQ | #VALUE! | 2,75 | #VALUE! |
| T7KIS14      | T6/T7 | E11 | 0.08  | 0.01  | kleiner LLOQ | #VALUE! | 2,75 | #VALUE! |
| T7KIS14      | T6/T7 | E12 | 0.08  | 0.01  | kleiner LLOQ | #VALUE! | 2,75 | #VALUE! |
| 0            | T6/T7 | F01 | 0     | 0     | kleiner LLOQ | #VALUE! | 1    | #VALUE! |
| 0            | T6/T7 | F02 | 0     | 0     | kleiner LLOQ | #VALUE! | 1    | #VALUE! |
| 0            | T6/T7 | F03 | 0     | 0     | kleiner LLOQ | #VALUE! | 1    | #VALUE! |
| 0            | T6/T7 | F04 | 0     | 0     | kleiner LLOQ | #VALUE! | 1    | #VALUE! |
| T7KIS21      | T6/T7 | F05 | 0.243 | 0.193 | 0.193        | 0.008   | 2,75 | 0.021   |
| T7KIS21      | T6/T7 | F06 | 0.304 | 0.253 | 0.253        | 0.010   | 2,75 | 0.029   |
| T7KIS22      | T6/T7 | F07 | 0.097 | 0.046 | kleiner LLOQ | #VALUE! | 2,75 | #VALUE! |
| T7KIS22      | T6/T7 | F08 | 0.142 | 0.091 | kleiner LLOQ | #VALUE! | 2,75 | #VALUE! |
| T7KIS23      | T6/T7 | F09 | 0.139 | 0.088 | kleiner LLOQ | #VALUE! | 2,75 | #VALUE! |
| T7KIS23      | T6/T7 | F10 | 0.137 | 0.086 | kleiner LLOQ | #VALUE! | 2,75 | #VALUE! |
| T7KIS24      | T6/T7 | F11 | 0.055 | 0.004 | kleiner LLOQ | #VALUE! | 2,75 | #VALUE! |
| T7KIS24      | T6/T7 | F12 | 0.054 | 0.003 | kleiner LLOQ | #VALUE! | 2,75 | #VALUE! |
| 0            | T6/T7 | G01 | 0     | 0     | kleiner LLOQ | #VALUE! | 1    | #VALUE! |
| 0            | T6/T7 | G02 | 0     | 0     | kleiner LLOQ | #VALUE! | 1    | #VALUE! |
| 0            | T6/T7 | G03 | 0     | 0     | kleiner LLOQ | #VALUE! | 1    | #VALUE! |
| 0            | T6/T7 | G04 | 0     | 0     | kleiner LLOQ | #VALUE! | 1    | #VALUE! |
| 0            | T6/T7 | G05 | 0     | 0     | kleiner LLOQ | #VALUE! | 1    | #VALUE! |
| 0            | T6/T7 | G06 | 0     | 0     | kleiner LLOQ | #VALUE! | 1    | #VALUE! |
| Blank PEG    | T6/T7 | G07 | 0     | 0     | kleiner LLOQ | #VALUE! | 2,75 | #VALUE! |
| Blank PEG    | T6/T7 | G08 | 0     | 0     | kleiner LLOQ | #VALUE! | 2,75 | #VALUE! |
| Blank PEG    | T6/T7 | G09 | 0     | 0     | kleiner LLOQ | #VALUE! | 2,75 | #VALUE! |
| Blank PEG    | T6/T7 | G10 | 0     | 0     | kleiner LLOQ | #VALUE! | 2,75 | #VALUE! |
| Blank PEG    | T6/T7 | G11 | 0     | 0     | kleiner LLOQ | #VALUE! | 2,75 | #VALUE! |
| Blank PEG    | T6/T7 | G12 | 0     | 0     | kleiner LLOQ | #VALUE! | 2,75 | #VALUE! |
| 0            | T6/T7 | H01 | 0     | 0     | kleiner LLOQ | #VALUE! | 1    | #VALUE! |
| 0            | T6/T7 | H02 | 0     | 0     | kleiner LLOQ | #VALUE! | 1    | #VALUE! |
| 0            | T6/T7 | H03 | 0     | 0     | kleiner LLOQ | #VALUE! | 1    | #VALUE! |
| 0            | T6/T7 | H04 | 0     | 0     | kleiner LLOQ | #VALUE! | 1    | #VALUE! |
| 0            | T6/T7 | H05 | 0     | 0     | kleiner LLOQ | #VALUE! | 1    | #VALUE! |
| 0            | T6/T7 | H06 | 0     | 0     | kleiner LLOQ | #VALUE! | 1    | #VALUE! |
| Blank no PEG | T6/T7 | H07 | 0     | 0     | kleiner LLOQ | #VALUE! | 2,75 | #VALUE! |
| Blank no PEG | T6/T7 | H08 | 0     | 0     | kleiner LLOQ | #VALUE! | 2,75 | #VALUE! |
| Blank no PEG | T6/T7 | H09 | 0     | 0     | kleiner LLOQ | #VALUE! | 2,75 | #VALUE! |
| Blank no PEG | T6/T7 | H10 | 0     | 0     | kleiner LLOQ | #VALUE! | 2,75 | #VALUE! |
| Blank no PEG | T6/T7 | H11 | 0     | 0     | kleiner LLOQ | #VALUE! | 2,75 | #VALUE! |
| Blank no PEG | T6/T7 | H12 | 0     | 0     | kleiner LLOQ | #VALUE! | 2,75 | #VALUE! |

|                    |              |                            |                         |                         |                              |
|--------------------|--------------|----------------------------|-------------------------|-------------------------|------------------------------|
| Project number     | F-120        | Apparatus                  | Wallac Victor           | Operator                | IsBa                         |
| GLP Study (Number) | n.a.         | Protocol (Instrument meth) | LDH test 2016           | Date of preparation     | 19-04-18                     |
| hot substance      | isotope      | n.a.                       | File name (results)     | IsBa_180419/20_LDH_full | Date of measurement          |
|                    | name         | n.a.                       | Kind of well plate      | 96 well                 | shaking time [min]           |
| cold substance     | ACB-ID       | n.a.                       | sample volume [µL]      | 100                     | stirring rate (Target) [rpm] |
|                    | Batch number | n.a.                       | Cocktail volume [µL]    | 175                     | Kind of measurement          |
| n.a.               | name         | LDH                        | ACB-ID of cocktail      |                         | Wave length [nm]             |
|                    | ACB-ID       | L23982R                    | Matrix                  | DMEM (from powder)+PE   | Remarks                      |
| n.a.               | Batch number | SLBK6345V                  | Blank description       | DMEM/PEG, H2O           | Remarks                      |
|                    |              |                            | Pipettes (No. / volume) | 50-200µl                | Remarks                      |
| n.a.               | n.a.         | Pipettes (No. / volume)    | n.a.                    | Remarks                 | n.a.                         |

Messdaten (diese Tabelle in Bericht übernehmen)

| Sample name * | concentration (theor.) * | measured data | measured data | measured data | mean measured | SD   | RSD  | Blank * | measured data after * | concentration (calc.) * | Deviation * | Residuen |
|---------------|--------------------------|---------------|---------------|---------------|---------------|------|------|---------|-----------------------|-------------------------|-------------|----------|
|               | [µg/mL]                  | [AU]          | [AU]          | [AU]          | [AU]          | [AU] | [%]  | [AU]    | Blank subtraction     | [µg/mL]                 | [%]         |          |
| KLP1          | 0.148                    | 1.579         | 1.652         | 1.627         | 1.62          | 0.03 | 1.87 | 0.047   | 1.568                 | 0.148                   | -0.24       | 0.00     |
| KLP2          | 0.114                    | 1.357         | 1.443         | 1.372         | 1.39          | 0.04 | 2.70 | 0.054   | 1.340                 | 0.110                   | -3.40       | 0.00     |
| KLP3          | 0.074                    | 1.272         | 1.193         | 1.228         | 1.23          | 0.03 | 2.63 | 0.051   | 1.180                 | 0.084                   | 13.04       | 0.01     |
| KLP4          | 0.041                    | 0.959         | 0.972         | 0.883         | 0.94          | 0.04 | 4.19 | 0.051   | 0.887                 | 0.035                   | -13.32      | -0.01    |
| KLP5          |                          |               |               |               |               |      |      | 0.052   |                       |                         |             |          |
| KLP6          |                          |               |               |               |               |      |      | 0.051   |                       |                         |             |          |
| KLP7          |                          |               |               |               |               |      |      |         |                       |                         |             |          |
| KLP8          |                          |               |               |               |               |      |      |         |                       |                         |             |          |

Statistical data

|                                              |                                          |                     |             |
|----------------------------------------------|------------------------------------------|---------------------|-------------|
| Geradensteigung                              | Slope                                    | m                   | 6.05        |
| Y-Achsenabschnitt                            | Y-intercept                              | b                   | 0.67        |
| Standardabw. Geradensteigung                 | SD-Slope                                 | S <sub>m</sub>      | 0.620291227 |
| Standardabw. Achsenabschnittes               | SD-Y-Intercept                           | S <sub>b</sub>      | 0.063894294 |
| Anzahl Messpunkte                            | number of measuring points               | n                   | 4           |
| Quadratsumme                                 | sum of squares                           | Q <sub>xx</sub>     | 0.006578604 |
| Bereichsmittle                               |                                          | f                   | 0.094336926 |
| Freiheitsgrade                               | degree of freedom                        | f                   | 2           |
| Student-t-Faktor für (P = 95 %; f = n-2)     | Student-t-factor for (P = 95 %; f = n-2) | t                   | 4.303       |
| Vertrauensbereich Steig. (95 %) Obergrenze   |                                          | m + VB <sub>m</sub> | 8.722319627 |
| Vertrauensbereich Steig. (95 %) Untergrenze  |                                          | m - VB <sub>m</sub> | 3.384093228 |
| Vertrauensbereich Achsenabschnitt (95 %) Og. |                                          | b + VB <sub>b</sub> | 0.946914615 |
| Vertrauensbereich Achsenabschnitt (95 %) Ug. |                                          | b - VB <sub>b</sub> | 0.398761518 |
| Korrelationskoeffizient                      | correlation coefficient                  | r                   | 0.9897      |
| Bestimmtheitsmaß                             | determination coefficient                | r <sup>2</sup>      | 0.9794      |
| Reststandardabweichung                       |                                          | S <sub>0</sub>      | 0.050310948 |
| Summe Restquadrat                            |                                          | sd                  | 2.895683345 |
| Verfahrensstandardabw.                       |                                          | S <sub>0p</sub>     | 0.008311454 |
| Rel. Verfahrensstandardabw. %                |                                          | V <sub>0p</sub>     | 8.810393374 |

|             |       |
|-------------|-------|
| mean Blank  | 0     |
| SD Blank    | 0.00  |
| RSD Blank   | 3.79  |
| x*SD (LLOQ) | 0     |
| x*SD (LOD)  | 0     |
| LLOQ (AU)   | 0     |
| LOD (AU)    | 0     |
| LLOQ        | 1.568 |
| LLOQ (Lin)  | 0.887 |

Evaluation / Comment

LDH linearity valid with 7 standards, split in lin high and lin low, each with 4 standards and KLP4 common standard for both. R<sup>2</sup> 0,9981, deviations for both between -13.34% and +13.04%

Date \_\_\_\_\_ Operator \_\_\_\_\_ Date \_\_\_\_\_ Control \_\_\_\_\_

Figure 1 Linearity

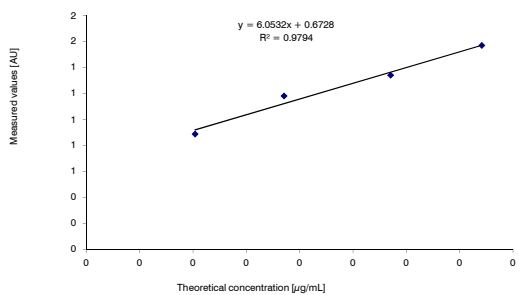

Figure 2 Method validation Residuen Plot

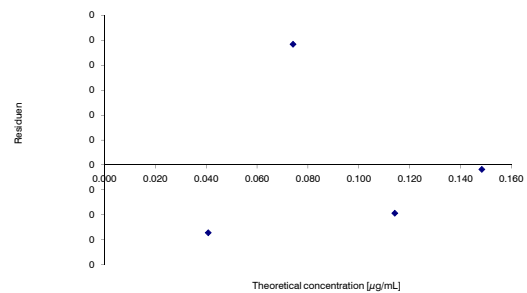

Evaluation / Comment

lin passed.

Date

Operator

Date

Control

| Sample name | Plate | Position | [AU]  | [AU-Blank] | Rating       | [µg/mL] | Dilution factor | [µg/mL] |
|-------------|-------|----------|-------|------------|--------------|---------|-----------------|---------|
| 0           | T0/T1 | A01      | 0     | 0          | kleiner LLOQ | #VALUE! | 1               | #VALUE! |
| 0           | T0/T1 | A02      | 0     | 0          | kleiner LLOQ | #VALUE! | 1               | #VALUE! |
| 0           | T0/T1 | A03      | 0     | 0          | kleiner LLOQ | #VALUE! | 1               | #VALUE! |
| 0           | T0/T1 | A04      | 0     | 0          | kleiner LLOQ | #VALUE! | 1               | #VALUE! |
| TOKIN1      | T0/T1 | A05      | 0     | 0          | kleiner LLOQ | #VALUE! | 1               | #VALUE! |
| TOKIN1      | T0/T1 | A06      | 0     | 0          | kleiner LLOQ | #VALUE! | 1               | #VALUE! |
| TOKIN2      | T0/T1 | A07      | 0.982 | 0.931      | 0.931        | 0.043   | 30.25           | 1.289   |
| TOKIN2      | T0/T1 | A08      | 0.987 | 0.936      | 0.936        | 0.043   | 30.25           | 1.314   |
| TOKIN3      | T0/T1 | A09      | 0.954 | 0.903      | 0.903        | 0.038   | 30.25           | 1.149   |
| TOKIN3      | T0/T1 | A10      | 1.024 | 0.974      | 0.974        | 0.050   | 30.25           | 1.503   |
| TOKIN4      | T0/T1 | A11      | 0     | 0          | kleiner LLOQ | #VALUE! | 1               | #VALUE! |
| TOKIN4      | T0/T1 | A12      | 0     | 0          | kleiner LLOQ | #VALUE! | 1               | #VALUE! |
| 0           | T0/T1 | B01      | 0     | 0          | kleiner LLOQ | #VALUE! | 1               | #VALUE! |
| 0           | T0/T1 | B02      | 0     | 0          | kleiner LLOQ | #VALUE! | 1               | #VALUE! |
| 0           | T0/T1 | B03      | 0     | 0          | kleiner LLOQ | #VALUE! | 1               | #VALUE! |
| 0           | T0/T1 | B04      | 0     | 0          | kleiner LLOQ | #VALUE! | 1               | #VALUE! |
| TOKIS11     | T0/T1 | B05      | 1.344 | 1.293      | 1.293        | 0.102   | 30.25           | 3.100   |
| TOKIS11     | T0/T1 | B06      | 1.340 | 1.289      | 1.289        | 0.102   | 30.25           | 3.078   |
| TOKIS12     | T0/T1 | B07      | 0     | 0          | kleiner LLOQ | #VALUE! | 1               | #VALUE! |
| TOKIS12     | T0/T1 | B08      | 0     | 0          | kleiner LLOQ | #VALUE! | 1               | #VALUE! |
| TOKIS13     | T0/T1 | B09      | 0     | 0          | kleiner LLOQ | #VALUE! | 1               | #VALUE! |
| TOKIS13     | T0/T1 | B10      | 0     | 0          | kleiner LLOQ | #VALUE! | 1               | #VALUE! |
| TOKIS14     | T0/T1 | B11      | 0     | 0          | kleiner LLOQ | #VALUE! | 1               | #VALUE! |
| TOKIS14     | T0/T1 | B12      | 0     | 0          | kleiner LLOQ | #VALUE! | 1               | #VALUE! |
| 0           | T0/T1 | C01      | 0     | 0          | kleiner LLOQ | #VALUE! | 1               | #VALUE! |
| 0           | T0/T1 | C02      | 0     | 0          | kleiner LLOQ | #VALUE! | 1               | #VALUE! |
| 0           | T0/T1 | C03      | 0     | 0          | kleiner LLOQ | #VALUE! | 1               | #VALUE! |
| 0           | T0/T1 | C04      | 0     | 0          | kleiner LLOQ | #VALUE! | 1               | #VALUE! |
| TOKIS21     | T0/T1 | C05      | 0     | 0          | kleiner LLOQ | #VALUE! | 1               | #VALUE! |
| TOKIS21     | T0/T1 | C06      | 0     | 0          | kleiner LLOQ | #VALUE! | 1               | #VALUE! |
| TOKIS22     | T0/T1 | C07      | 1.173 | 1.122      | 1.122        | 0.074   | 30.25           | 2.244   |
| TOKIS22     | T0/T1 | C08      | 1.385 | 1.334      | 1.334        | 0.109   | 30.25           | 3.303   |
| TOKIS23     | T0/T1 | C09      | 0.942 | 0.891      | 0.891        | 0.036   | 30.25           | 1.092   |
| TOKIS23     | T0/T1 | C10      | 0.950 | 0.899      | 0.899        | 0.037   | 30.25           | 1.132   |
| TOKIS24     | T0/T1 | C11      | 0     | 0          | kleiner LLOQ | #VALUE! | 1               | #VALUE! |
| TOKIS24     | T0/T1 | C12      | 0     | 0          | kleiner LLOQ | #VALUE! | 1               | #VALUE! |
| 0           | T0/T1 | D01      | 0     | 0          | kleiner LLOQ | #VALUE! | 1               | #VALUE! |
| 0           | T0/T1 | D02      | 0     | 0          | kleiner LLOQ | #VALUE! | 1               | #VALUE! |
| 0           | T0/T1 | D03      | 0     | 0          | kleiner LLOQ | #VALUE! | 1               | #VALUE! |
| 0           | T0/T1 | D04      | 0     | 0          | kleiner LLOQ | #VALUE! | 1               | #VALUE! |
| T1KIN1      | T0/T1 | D05      | 0     | 0          | kleiner LLOQ | #VALUE! | 1               | #VALUE! |
| T1KIN1      | T0/T1 | D06      | 0     | 0          | kleiner LLOQ | #VALUE! | 1               | #VALUE! |
| T1KIN2      | T0/T1 | D07      | 0     | 0          | kleiner LLOQ | #VALUE! | 1               | #VALUE! |
| T1KIN2      | T0/T1 | D08      | 0     | 0          | kleiner LLOQ | #VALUE! | 1               | #VALUE! |
| T1KIN3      | T0/T1 | D09      | 0     | 0          | kleiner LLOQ | #VALUE! | 1               | #VALUE! |
| T1KIN3      | T0/T1 | D10      | 0     | 0          | kleiner LLOQ | #VALUE! | 1               | #VALUE! |
| T1KIN4      | T0/T1 | D11      | 0     | 0          | kleiner LLOQ | #VALUE! | 1               | #VALUE! |

Plate: T0/T1

|   | 1 | 2 | 3 | 4 | 5     | 6     | 7     | 8     | 9     | 10    | 11    | 12    |
|---|---|---|---|---|-------|-------|-------|-------|-------|-------|-------|-------|
| A |   |   |   |   |       |       | 0.982 | 0.987 | 0.954 | 1.024 |       |       |
| B |   |   |   |   | 1.344 | 1.340 |       |       |       |       |       |       |
| C |   |   |   |   |       |       | 1.173 | 1.385 | 0.942 | 0.950 |       |       |
| D |   |   |   |   |       |       |       |       |       |       |       |       |
| E |   |   |   |   |       |       |       |       |       |       |       |       |
| F |   |   |   |   |       |       |       |       |       |       |       |       |
| G |   |   |   |   |       |       | 0.050 | 0.051 | 0.049 | 0.045 | 0.047 | 0.049 |
| H |   |   |   |   |       |       | 0.049 | 0.048 | 0.048 | 0.048 | 0.048 | 0.048 |

Plattenbelegung

|   | 1 | 2 | 3 | 4 | 5       | 6       | 7            | 8            | 9            | 10           | 11           | 12           |
|---|---|---|---|---|---------|---------|--------------|--------------|--------------|--------------|--------------|--------------|
| A |   |   |   |   | TOKIN1  | TOKIN1  | TOKIN2       | TOKIN2       | TOKIN3       | TOKIN3       | TOKIN4       | TOKIN4       |
| B |   |   |   |   | TOKIS11 | TOKIS11 | TOKIS12      | TOKIS12      | TOKIS13      | TOKIS13      | TOKIS14      | TOKIS14      |
| C |   |   |   |   | TOKIS21 | TOKIS21 | TOKIS22      | TOKIS22      | TOKIS23      | TOKIS23      | TOKIS24      | TOKIS24      |
| D |   |   |   |   | T1KIN1  | T1KIN1  | T1KIN2       | T1KIN2       | T1KIN3       | T1KIN3       | T1KIN4       | T1KIN4       |
| E |   |   |   |   | T1KIS11 | T1KIS11 | T1KIS12      | T1KIS12      | T1KIS13      | T1KIS13      | T1KIS14      | T1KIS14      |
| F |   |   |   |   | T1KIS21 | T1KIS21 | T1KIS22      | T1KIS22      | T1KIS23      | T1KIS23      | T1KIS24      | T1KIS24      |
| G |   |   |   |   |         |         | Blank PEG    | Blank PEG    | Blank PEG    | Blank PEG    | Blank PEG    | Blank PEG    |
| H |   |   |   |   |         |         | Blank no PEG | Blank no PEG | Blank no PEG | Blank no PEG | Blank no PEG | Blank no PEG |

T0 dil. 11\*dil2,75=dil.30,25  
T1 dil. 10\*dil2,75=dil.27,5

Comment:

Samples aufgeteilt in lin high und low:niedriger konzentrierte Samples bei lin low zu finden.

Date Operator Date Control

|              |       |     |       |   |              |         |      |         |
|--------------|-------|-----|-------|---|--------------|---------|------|---------|
| T1KIN4       | T0/T1 | D12 | 0     | 0 | kleiner LLOQ | #VALUE! | 1    | #VALUE! |
| 0            | T0/T1 | E01 | 0     | 0 | kleiner LLOQ | #VALUE! | 1    | #VALUE! |
| 0            | T0/T1 | E02 | 0     | 0 | kleiner LLOQ | #VALUE! | 1    | #VALUE! |
| 0            | T0/T1 | E03 | 0     | 0 | kleiner LLOQ | #VALUE! | 1    | #VALUE! |
| 0            | T0/T1 | E04 | 0     | 0 | kleiner LLOQ | #VALUE! | 1    | #VALUE! |
| T1KIS11      | T0/T1 | E05 | 0     | 0 | kleiner LLOQ | #VALUE! | 1    | #VALUE! |
| T1KIS11      | T0/T1 | E06 | 0     | 0 | kleiner LLOQ | #VALUE! | 1    | #VALUE! |
| T1KIS12      | T0/T1 | E07 | 0     | 0 | kleiner LLOQ | #VALUE! | 1    | #VALUE! |
| T1KIS12      | T0/T1 | E08 | 0     | 0 | kleiner LLOQ | #VALUE! | 1    | #VALUE! |
| T1KIS13      | T0/T1 | E09 | 0     | 0 | kleiner LLOQ | #VALUE! | 1    | #VALUE! |
| T1KIS13      | T0/T1 | E10 | 0     | 0 | kleiner LLOQ | #VALUE! | 1    | #VALUE! |
| T1KIS14      | T0/T1 | E11 | 0     | 0 | kleiner LLOQ | #VALUE! | 1    | #VALUE! |
| T1KIS14      | T0/T1 | E12 | 0     | 0 | kleiner LLOQ | #VALUE! | 1    | #VALUE! |
| 0            | T0/T1 | F01 | 0     | 0 | kleiner LLOQ | #VALUE! | 1    | #VALUE! |
| 0            | T0/T1 | F02 | 0     | 0 | kleiner LLOQ | #VALUE! | 1    | #VALUE! |
| 0            | T0/T1 | F03 | 0     | 0 | kleiner LLOQ | #VALUE! | 1    | #VALUE! |
| 0            | T0/T1 | F04 | 0     | 0 | kleiner LLOQ | #VALUE! | 1    | #VALUE! |
| T1KIS21      | T0/T1 | F05 | 0     | 0 | kleiner LLOQ | #VALUE! | 1    | #VALUE! |
| T1KIS21      | T0/T1 | F06 | 0     | 0 | kleiner LLOQ | #VALUE! | 1    | #VALUE! |
| T1KIS22      | T0/T1 | F07 | 0     | 0 | kleiner LLOQ | #VALUE! | 1    | #VALUE! |
| T1KIS22      | T0/T1 | F08 | 0     | 0 | kleiner LLOQ | #VALUE! | 1    | #VALUE! |
| T1KIS23      | T0/T1 | F09 | 0     | 0 | kleiner LLOQ | #VALUE! | 1    | #VALUE! |
| T1KIS23      | T0/T1 | F10 | 0     | 0 | kleiner LLOQ | #VALUE! | 1    | #VALUE! |
| T1KIS24      | T0/T1 | F11 | 0     | 0 | kleiner LLOQ | #VALUE! | 1    | #VALUE! |
| T1KIS24      | T0/T1 | F12 | 0     | 0 | kleiner LLOQ | #VALUE! | 1    | #VALUE! |
| 0            | T0/T1 | G01 | 0     | 0 | kleiner LLOQ | #VALUE! | 1    | #VALUE! |
| 0            | T0/T1 | G02 | 0     | 0 | kleiner LLOQ | #VALUE! | 1    | #VALUE! |
| 0            | T0/T1 | G03 | 0     | 0 | kleiner LLOQ | #VALUE! | 1    | #VALUE! |
| 0            | T0/T1 | G04 | 0     | 0 | kleiner LLOQ | #VALUE! | 1    | #VALUE! |
| 0            | T0/T1 | G05 | 0     | 0 | kleiner LLOQ | #VALUE! | 1    | #VALUE! |
| 0            | T0/T1 | G06 | 0     | 0 | kleiner LLOQ | #VALUE! | 1    | #VALUE! |
| Blank PEG    | T0/T1 | G07 | 0.050 | 0 | kleiner LLOQ | #VALUE! | 2.75 | #VALUE! |
| Blank PEG    | T0/T1 | G08 | 0.051 | 0 | kleiner LLOQ | #VALUE! | 2.75 | #VALUE! |
| Blank PEG    | T0/T1 | G09 | 0.049 | 0 | kleiner LLOQ | #VALUE! | 2.75 | #VALUE! |
| Blank PEG    | T0/T1 | G10 | 0.045 | 0 | kleiner LLOQ | #VALUE! | 2.75 | #VALUE! |
| Blank PEG    | T0/T1 | G11 | 0.047 | 0 | kleiner LLOQ | #VALUE! | 2.75 | #VALUE! |
| Blank PEG    | T0/T1 | G12 | 0.048 | 0 | kleiner LLOQ | #VALUE! | 2.75 | #VALUE! |
| 0            | T0/T1 | H01 | 0     | 0 | kleiner LLOQ | #VALUE! | 1    | #VALUE! |
| 0            | T0/T1 | H02 | 0     | 0 | kleiner LLOQ | #VALUE! | 1    | #VALUE! |
| 0            | T0/T1 | H03 | 0     | 0 | kleiner LLOQ | #VALUE! | 1    | #VALUE! |
| 0            | T0/T1 | H04 | 0     | 0 | kleiner LLOQ | #VALUE! | 1    | #VALUE! |
| 0            | T0/T1 | H05 | 0     | 0 | kleiner LLOQ | #VALUE! | 1    | #VALUE! |
| 0            | T0/T1 | H06 | 0     | 0 | kleiner LLOQ | #VALUE! | 1    | #VALUE! |
| Blank no PEG | T0/T1 | H07 | 0.049 | 0 | kleiner LLOQ | #VALUE! | 2.75 | #VALUE! |
| Blank no PEG | T0/T1 | H08 | 0.048 | 0 | kleiner LLOQ | #VALUE! | 2.75 | #VALUE! |
| Blank no PEG | T0/T1 | H09 | 0.048 | 0 | kleiner LLOQ | #VALUE! | 2.75 | #VALUE! |
| Blank no PEG | T0/T1 | H10 | 0.048 | 0 | kleiner LLOQ | #VALUE! | 2.75 | #VALUE! |
| Blank no PEG | T0/T1 | H11 | 0.048 | 0 | kleiner LLOQ | #VALUE! | 2.75 | #VALUE! |
| Blank no PEG | T0/T1 | H12 | 0.048 | 0 | kleiner LLOQ | #VALUE! | 2.75 | #VALUE! |

|         |       |     |   |   |              |         |    |         |
|---------|-------|-----|---|---|--------------|---------|----|---------|
| 0       | T2/T3 | A01 | 0 | 0 | kleiner LLOQ | #VALUE! | 2  | #VALUE! |
| 0       | T2/T3 | A02 | 0 | 0 | kleiner LLOQ | #VALUE! | 3  | #VALUE! |
| 0       | T2/T3 | A03 | 0 | 0 | kleiner LLOQ | #VALUE! | 4  | #VALUE! |
| 0       | T2/T3 | A04 | 0 | 0 | kleiner LLOQ | #VALUE! | 5  | #VALUE! |
| T2KIN1  | T2/T3 | A05 | 0 | 0 | kleiner LLOQ | #VALUE! | 6  | #VALUE! |
| T2KIN1  | T2/T3 | A06 | 0 | 0 | kleiner LLOQ | #VALUE! | 7  | #VALUE! |
| T2KIN2  | T2/T3 | A07 | 0 | 0 | kleiner LLOQ | #VALUE! | 8  | #VALUE! |
| T2KIN2  | T2/T3 | A08 | 0 | 0 | kleiner LLOQ | #VALUE! | 9  | #VALUE! |
| T2KIN3  | T2/T3 | A09 | 0 | 0 | kleiner LLOQ | #VALUE! | 10 | #VALUE! |
| T2KIN3  | T2/T3 | A10 | 0 | 0 | kleiner LLOQ | #VALUE! | 11 | #VALUE! |
| T2KIN4  | T2/T3 | A11 | 0 | 0 | kleiner LLOQ | #VALUE! | 12 | #VALUE! |
| T2KIN4  | T2/T3 | A12 | 0 | 0 | kleiner LLOQ | #VALUE! | 13 | #VALUE! |
| 0       | T2/T3 | B01 | 0 | 0 | kleiner LLOQ | #VALUE! | 14 | #VALUE! |
| 0       | T2/T3 | B02 | 0 | 0 | kleiner LLOQ | #VALUE! | 15 | #VALUE! |
| 0       | T2/T3 | B03 | 0 | 0 | kleiner LLOQ | #VALUE! | 16 | #VALUE! |
| 0       | T2/T3 | B04 | 0 | 0 | kleiner LLOQ | #VALUE! | 17 | #VALUE! |
| T2KIS11 | T2/T3 | B05 | 0 | 0 | kleiner LLOQ | #VALUE! | 18 | #VALUE! |
| T2KIS11 | T2/T3 | B06 | 0 | 0 | kleiner LLOQ | #VALUE! | 19 | #VALUE! |
| T2KIS12 | T2/T3 | B07 | 0 | 0 | kleiner LLOQ | #VALUE! | 20 | #VALUE! |
| T2KIS12 | T2/T3 | B08 | 0 | 0 | kleiner LLOQ | #VALUE! | 21 | #VALUE! |
| T2KIS13 | T2/T3 | B09 | 0 | 0 | kleiner LLOQ | #VALUE! | 22 | #VALUE! |
| T2KIS13 | T2/T3 | B10 | 0 | 0 | kleiner LLOQ | #VALUE! | 23 | #VALUE! |
| T2KIS14 | T2/T3 | B11 | 0 | 0 | kleiner LLOQ | #VALUE! | 24 | #VALUE! |
| T2KIS14 | T2/T3 | B12 | 0 | 0 | kleiner LLOQ | #VALUE! | 25 | #VALUE! |
| 0       | T2/T3 | C01 | 0 | 0 | kleiner LLOQ | #VALUE! | 26 | #VALUE! |
| 0       | T2/T3 | C02 | 0 | 0 | kleiner LLOQ | #VALUE! | 27 | #VALUE! |
| 0       | T2/T3 | C03 | 0 | 0 | kleiner LLOQ | #VALUE! | 28 | #VALUE! |
| 0       | T2/T3 | C04 | 0 | 0 | kleiner LLOQ | #VALUE! | 29 | #VALUE! |
| T2KIS21 | T2/T3 | C05 | 0 | 0 | kleiner LLOQ | #VALUE! | 30 | #VALUE! |
| T2KIS21 | T2/T3 | C06 | 0 | 0 | kleiner LLOQ | #VALUE! | 31 | #VALUE! |
| T2KIS22 | T2/T3 | C07 | 0 | 0 | kleiner LLOQ | #VALUE! | 32 | #VALUE! |
| T2KIS22 | T2/T3 | C08 | 0 | 0 | kleiner LLOQ | #VALUE! | 33 | #VALUE! |
| T2KIS23 | T2/T3 | C09 | 0 | 0 | kleiner LLOQ | #VALUE! | 34 | #VALUE! |
| T2KIS23 | T2/T3 | C10 | 0 | 0 | kleiner LLOQ | #VALUE! | 35 | #VALUE! |
| T2KIS24 | T2/T3 | C11 | 0 | 0 | kleiner LLOQ | #VALUE! | 36 | #VALUE! |
| T2KIS24 | T2/T3 | C12 | 0 | 0 | kleiner LLOQ | #VALUE! | 37 | #VALUE! |
| 0       | T2/T3 | D01 | 0 | 0 | kleiner LLOQ | #VALUE! | 38 | #VALUE! |
| 0       | T2/T3 | D02 | 0 | 0 | kleiner LLOQ | #VALUE! | 39 | #VALUE! |
| 0       | T2/T3 | D03 | 0 | 0 | kleiner LLOQ | #VALUE! | 40 | #VALUE! |
| 0       | T2/T3 | D04 | 0 | 0 | kleiner LLOQ | #VALUE! | 41 | #VALUE! |
| T3KIN1  | T2/T3 | D05 | 0 | 0 | kleiner LLOQ | #VALUE! | 42 | #VALUE! |
| T3KIN1  | T2/T3 | D06 | 0 | 0 | kleiner LLOQ | #VALUE! | 43 | #VALUE! |
| T3KIN2  | T2/T3 | D07 | 0 | 0 | kleiner LLOQ | #VALUE! | 44 | #VALUE! |
| T3KIN2  | T2/T3 | D08 | 0 | 0 | kleiner LLOQ | #VALUE! | 45 | #VALUE! |
| T3KIN3  | T2/T3 | D09 | 0 | 0 | kleiner LLOQ | #VALUE! | 46 | #VALUE! |
| T3KIN3  | T2/T3 | D10 | 0 | 0 | kleiner LLOQ | #VALUE! | 47 | #VALUE! |
| T3KIN4  | T2/T3 | D11 | 0 | 0 | kleiner LLOQ | #VALUE! | 48 | #VALUE! |
| T3KIN4  | T2/T3 | D12 | 0 | 0 | kleiner LLOQ | #VALUE! | 49 | #VALUE! |

Plate: T2/T3

|   |   |   |   |   |   |   |       |       |       |       |       |       |
|---|---|---|---|---|---|---|-------|-------|-------|-------|-------|-------|
|   | 1 | 2 | 3 | 4 | 5 | 6 | 7     | 8     | 9     | 10    | 11    | 12    |
| A |   |   |   |   |   |   |       |       |       |       |       |       |
| B |   |   |   |   |   |   |       |       |       |       |       |       |
| C |   |   |   |   |   |   |       |       |       |       |       |       |
| D |   |   |   |   |   |   |       |       |       |       |       |       |
| E |   |   |   |   |   |   |       |       |       |       |       |       |
| F |   |   |   |   |   |   |       |       |       |       |       |       |
| G |   |   |   |   |   |   | 0.050 | 0.050 | 0.048 | 0.050 | 0.050 | 0.050 |
| H |   |   |   |   |   |   | 0.050 | 0.049 | 0.051 | 0.050 | 0.050 | 0.050 |

Plattenbelegung

|   |   |   |   |   |         |         |              |              |              |              |              |              |
|---|---|---|---|---|---------|---------|--------------|--------------|--------------|--------------|--------------|--------------|
|   | 1 | 2 | 3 | 4 | 5       | 6       | 7            | 8            | 9            | 10           | 11           | 12           |
| A |   |   |   |   | T2KIN1  | T2KIN1  | T2KIN2       | T2KIN2       | T2KIN3       | T2KIN3       | T2KIN4       | T2KIN4       |
| B |   |   |   |   | T2KIS11 | T2KIS11 | T2KIS12      | T2KIS12      | T2KIS13      | T2KIS13      | T2KIS14      | T2KIS14      |
| C |   |   |   |   | T2KIS21 | T2KIS21 | T2KIS22      | T2KIS22      | T2KIS23      | T2KIS23      | T2KIS24      | T2KIS24      |
| D |   |   |   |   | T3KIN1  | T3KIN1  | T3KIN2       | T3KIN2       | T3KIN3       | T3KIN3       | T3KIN4       | T3KIN4       |
| E |   |   |   |   | T3KIS11 | T3KIS11 | T3KIS12      | T3KIS12      | T3KIS13      | T3KIS13      | T3KIS14      | T3KIS14      |
| F |   |   |   |   | T3KIS21 | T3KIS21 | T3KIS22      | T3KIS22      | T3KIS23      | T3KIS23      | T3KIS24      | T3KIS24      |
| G |   |   |   |   |         |         | Blank PEG    | Blank PEG    | Blank PEG    | Blank PEG    | Blank PEG    | Blank PEG    |
| H |   |   |   |   |         |         | Blank no PEG | Blank no PEG | Blank no PEG | Blank no PEG | Blank no PEG | Blank no PEG |

T2 dil. 9° dil. 2,75=dil. 24,75  
T3 dil. 6° dil. 2,75=dil. 16,5

Comment:

alle Messwerte in low

Date Operator

Date Control

|              |       |     |   |   |              |         |     |         |
|--------------|-------|-----|---|---|--------------|---------|-----|---------|
| 0            |       |     |   |   |              | 59      |     |         |
| 0            | T2/T3 | E01 | 0 | 0 | kleiner LLOQ | #VALUE! | 60  | #VALUE! |
| 0            | T2/T3 | E02 | 0 | 0 | kleiner LLOQ | #VALUE! | 61  | #VALUE! |
| 0            | T2/T3 | E03 | 0 | 0 | kleiner LLOQ | #VALUE! | 62  | #VALUE! |
| 0            | T2/T3 | E04 | 0 | 0 | kleiner LLOQ | #VALUE! | 63  | #VALUE! |
| T3KIS11      | T2/T3 | E05 | 0 | 0 | kleiner LLOQ | #VALUE! | 64  | #VALUE! |
| T3KIS11      | T2/T3 | E06 | 0 | 0 | kleiner LLOQ | #VALUE! | 65  | #VALUE! |
| T3KIS12      | T2/T3 | E07 | 0 | 0 | kleiner LLOQ | #VALUE! | 66  | #VALUE! |
| T3KIS12      | T2/T3 | E08 | 0 | 0 | kleiner LLOQ | #VALUE! | 67  | #VALUE! |
| T3KIS13      | T2/T3 | E09 | 0 | 0 | kleiner LLOQ | #VALUE! | 68  | #VALUE! |
| T3KIS13      | T2/T3 | E10 | 0 | 0 | kleiner LLOQ | #VALUE! | 69  | #VALUE! |
| T3KIS14      | T2/T3 | E11 | 0 | 0 | kleiner LLOQ | #VALUE! | 70  | #VALUE! |
| T3KIS14      | T2/T3 | E12 | 0 | 0 | kleiner LLOQ | #VALUE! | 71  | #VALUE! |
| 0            | T2/T3 | F01 | 0 | 0 | kleiner LLOQ | #VALUE! | 72  | #VALUE! |
| 0            | T2/T3 | F02 | 0 | 0 | kleiner LLOQ | #VALUE! | 73  | #VALUE! |
| 0            | T2/T3 | F03 | 0 | 0 | kleiner LLOQ | #VALUE! | 74  | #VALUE! |
| 0            | T2/T3 | F04 | 0 | 0 | kleiner LLOQ | #VALUE! | 75  | #VALUE! |
| T3KIS21      | T2/T3 | F05 | 0 | 0 | kleiner LLOQ | #VALUE! | 76  | #VALUE! |
| T3KIS21      | T2/T3 | F06 | 0 | 0 | kleiner LLOQ | #VALUE! | 77  | #VALUE! |
| T3KIS22      | T2/T3 | F07 | 0 | 0 | kleiner LLOQ | #VALUE! | 78  | #VALUE! |
| T3KIS22      | T2/T3 | F08 | 0 | 0 | kleiner LLOQ | #VALUE! | 79  | #VALUE! |
| T3KIS23      | T2/T3 | F09 | 0 | 0 | kleiner LLOQ | #VALUE! | 80  | #VALUE! |
| T3KIS23      | T2/T3 | F10 | 0 | 0 | kleiner LLOQ | #VALUE! | 81  | #VALUE! |
| T3KIS24      | T2/T3 | F11 | 0 | 0 | kleiner LLOQ | #VALUE! | 82  | #VALUE! |
| T3KIS24      | T2/T3 | F12 | 0 | 0 | kleiner LLOQ | #VALUE! | 83  | #VALUE! |
| 0            | T2/T3 | G01 | 0 | 0 | kleiner LLOQ | #VALUE! | 84  | #VALUE! |
| 0            | T2/T3 | G02 | 0 | 0 | kleiner LLOQ | #VALUE! | 85  | #VALUE! |
| 0            | T2/T3 | G03 | 0 | 0 | kleiner LLOQ | #VALUE! | 86  | #VALUE! |
| 0            | T2/T3 | G04 | 0 | 0 | kleiner LLOQ | #VALUE! | 87  | #VALUE! |
| 0            | T2/T3 | G05 | 0 | 0 | kleiner LLOQ | #VALUE! | 88  | #VALUE! |
| 0            | T2/T3 | G06 | 0 | 0 | kleiner LLOQ | #VALUE! | 89  | #VALUE! |
| Blank PEG    | T2/T3 | G07 | 0 | 0 | kleiner LLOQ | #VALUE! | 90  | #VALUE! |
| Blank PEG    | T2/T3 | G08 | 0 | 0 | kleiner LLOQ | #VALUE! | 91  | #VALUE! |
| Blank PEG    | T2/T3 | G09 | 0 | 0 | kleiner LLOQ | #VALUE! | 92  | #VALUE! |
| Blank PEG    | T2/T3 | G10 | 0 | 0 | kleiner LLOQ | #VALUE! | 93  | #VALUE! |
| Blank PEG    | T2/T3 | G11 | 0 | 0 | kleiner LLOQ | #VALUE! | 94  | #VALUE! |
| Blank PEG    | T2/T3 | G12 | 0 | 0 | kleiner LLOQ | #VALUE! | 95  | #VALUE! |
| 0            | T2/T3 | H01 | 0 | 0 | kleiner LLOQ | #VALUE! | 96  | #VALUE! |
| 0            | T2/T3 | H02 | 0 | 0 | kleiner LLOQ | #VALUE! | 97  | #VALUE! |
| 0            | T2/T3 | H03 | 0 | 0 | kleiner LLOQ | #VALUE! | 98  | #VALUE! |
| 0            | T2/T3 | H04 | 0 | 0 | kleiner LLOQ | #VALUE! | 99  | #VALUE! |
| 0            | T2/T3 | H05 | 0 | 0 | kleiner LLOQ | #VALUE! | 100 | #VALUE! |
| 0            | T2/T3 | H06 | 0 | 0 | kleiner LLOQ | #VALUE! | 101 | #VALUE! |
| Blank no PEG | T2/T3 | H07 | 0 | 0 | kleiner LLOQ | #VALUE! | 102 | #VALUE! |
| Blank no PEG | T2/T3 | H08 | 0 | 0 | kleiner LLOQ | #VALUE! | 103 | #VALUE! |
| Blank no PEG | T2/T3 | H09 | 0 | 0 | kleiner LLOQ | #VALUE! | 104 | #VALUE! |
| Blank no PEG | T2/T3 | H10 | 0 | 0 | kleiner LLOQ | #VALUE! | 105 | #VALUE! |
| Blank no PEG | T2/T3 | H11 | 0 | 0 | kleiner LLOQ | #VALUE! | 106 | #VALUE! |
| Blank no PEG | T2/T3 | H12 | 0 | 0 | kleiner LLOQ | #VALUE! | 107 | #VALUE! |

|         |       |     |   |   |              |         |     |         |
|---------|-------|-----|---|---|--------------|---------|-----|---------|
| 0       | T4/T5 | A01 | 0 | 0 | kleiner LLOQ | #VALUE! | 98  | #VALUE! |
| 0       | T4/T5 | A02 | 0 | 0 | kleiner LLOQ | #VALUE! | 99  | #VALUE! |
| 0       | T4/T5 | A03 | 0 | 0 | kleiner LLOQ | #VALUE! | 100 | #VALUE! |
| 0       | T4/T5 | A04 | 0 | 0 | kleiner LLOQ | #VALUE! | 101 | #VALUE! |
| T4KIN1  | T4/T5 | A05 | 0 | 0 | kleiner LLOQ | #VALUE! | 102 | #VALUE! |
| T4KIN1  | T4/T5 | A06 | 0 | 0 | kleiner LLOQ | #VALUE! | 103 | #VALUE! |
| T4KIN2  | T4/T5 | A07 | 0 | 0 | kleiner LLOQ | #VALUE! | 104 | #VALUE! |
| T4KIN2  | T4/T5 | A08 | 0 | 0 | kleiner LLOQ | #VALUE! | 105 | #VALUE! |
| T4KIN3  | T4/T5 | A09 | 0 | 0 | kleiner LLOQ | #VALUE! | 106 | #VALUE! |
| T4KIN3  | T4/T5 | A10 | 0 | 0 | kleiner LLOQ | #VALUE! | 107 | #VALUE! |
| T4KIN4  | T4/T5 | A11 | 0 | 0 | kleiner LLOQ | #VALUE! | 108 | #VALUE! |
| T4KIN4  | T4/T5 | A12 | 0 | 0 | kleiner LLOQ | #VALUE! | 109 | #VALUE! |
| 0       | T4/T5 | B01 | 0 | 0 | kleiner LLOQ | #VALUE! | 110 | #VALUE! |
| 0       | T4/T5 | B02 | 0 | 0 | kleiner LLOQ | #VALUE! | 111 | #VALUE! |
| 0       | T4/T5 | B03 | 0 | 0 | kleiner LLOQ | #VALUE! | 112 | #VALUE! |
| 0       | T4/T5 | B04 | 0 | 0 | kleiner LLOQ | #VALUE! | 113 | #VALUE! |
| T4KIS11 | T4/T5 | B05 | 0 | 0 | kleiner LLOQ | #VALUE! | 114 | #VALUE! |
| T4KIS11 | T4/T5 | B06 | 0 | 0 | kleiner LLOQ | #VALUE! | 115 | #VALUE! |
| T4KIS12 | T4/T5 | B07 | 0 | 0 | kleiner LLOQ | #VALUE! | 116 | #VALUE! |
| T4KIS12 | T4/T5 | B08 | 0 | 0 | kleiner LLOQ | #VALUE! | 117 | #VALUE! |
| T4KIS13 | T4/T5 | B09 | 0 | 0 | kleiner LLOQ | #VALUE! | 118 | #VALUE! |
| T4KIS13 | T4/T5 | B10 | 0 | 0 | kleiner LLOQ | #VALUE! | 119 | #VALUE! |
| T4KIS14 | T4/T5 | B11 | 0 | 0 | kleiner LLOQ | #VALUE! | 120 | #VALUE! |
| T4KIS14 | T4/T5 | B12 | 0 | 0 | kleiner LLOQ | #VALUE! | 121 | #VALUE! |
| 0       | T4/T5 | C01 | 0 | 0 | kleiner LLOQ | #VALUE! | 122 | #VALUE! |
| 0       | T4/T5 | C02 | 0 | 0 | kleiner LLOQ | #VALUE! | 123 | #VALUE! |
| 0       | T4/T5 | C03 | 0 | 0 | kleiner LLOQ | #VALUE! | 124 | #VALUE! |
| 0       | T4/T5 | C04 | 0 | 0 | kleiner LLOQ | #VALUE! | 125 | #VALUE! |
| T4KIS21 | T4/T5 | C05 | 0 | 0 | kleiner LLOQ | #VALUE! | 126 | #VALUE! |
| T4KIS21 | T4/T5 | C06 | 0 | 0 | kleiner LLOQ | #VALUE! | 127 | #VALUE! |
| T4KIS22 | T4/T5 | C07 | 0 | 0 | kleiner LLOQ | #VALUE! | 128 | #VALUE! |
| T4KIS22 | T4/T5 | C08 | 0 | 0 | kleiner LLOQ | #VALUE! | 129 | #VALUE! |
| T4KIS23 | T4/T5 | C09 | 0 | 0 | kleiner LLOQ | #VALUE! | 130 | #VALUE! |
| T4KIS23 | T4/T5 | C10 | 0 | 0 | kleiner LLOQ | #VALUE! | 131 | #VALUE! |
| T4KIS24 | T4/T5 | C11 | 0 | 0 | kleiner LLOQ | #VALUE! | 132 | #VALUE! |
| T4KIS24 | T4/T5 | C12 | 0 | 0 | kleiner LLOQ | #VALUE! | 133 | #VALUE! |
| 0       | T4/T5 | D01 | 0 | 0 | kleiner LLOQ | #VALUE! | 134 | #VALUE! |
| 0       | T4/T5 | D02 | 0 | 0 | kleiner LLOQ | #VALUE! | 135 | #VALUE! |
| 0       | T4/T5 | D03 | 0 | 0 | kleiner LLOQ | #VALUE! | 136 | #VALUE! |
| 0       | T4/T5 | D04 | 0 | 0 | kleiner LLOQ | #VALUE! | 137 | #VALUE! |
| T5KIN1  | T4/T5 | D05 | 0 | 0 | kleiner LLOQ | #VALUE! | 138 | #VALUE! |
| T5KIN1  | T4/T5 | D06 | 0 | 0 | kleiner LLOQ | #VALUE! | 139 | #VALUE! |
| T5KIN2  | T4/T5 | D07 | 0 | 0 | kleiner LLOQ | #VALUE! | 140 | #VALUE! |
| T5KIN2  | T4/T5 | D08 | 0 | 0 | kleiner LLOQ | #VALUE! | 141 | #VALUE! |
| T5KIN3  | T4/T5 | D09 | 0 | 0 | kleiner LLOQ | #VALUE! | 142 | #VALUE! |

Plate: T4/T5

|   |   |   |   |   |   |   |   |   |   |    |    |    |
|---|---|---|---|---|---|---|---|---|---|----|----|----|
|   | 1 | 2 | 3 | 4 | 5 | 6 | 7 | 8 | 9 | 10 | 11 | 12 |
| A |   |   |   |   |   |   |   |   |   |    |    |    |
| B |   |   |   |   |   |   |   |   |   |    |    |    |
| C |   |   |   |   |   |   |   |   |   |    |    |    |
| D |   |   |   |   |   |   |   |   |   |    |    |    |
| E |   |   |   |   |   |   |   |   |   |    |    |    |
| F |   |   |   |   |   |   |   |   |   |    |    |    |
| G |   |   |   |   |   |   |   |   |   |    |    |    |
| H |   |   |   |   |   |   |   |   |   |    |    |    |

Plattenbelegung

|   |   |   |   |   |         |         |              |              |              |              |              |              |
|---|---|---|---|---|---------|---------|--------------|--------------|--------------|--------------|--------------|--------------|
|   | 1 | 2 | 3 | 4 | 5       | 6       | 7            | 8            | 9            | 10           | 11           | 12           |
| A |   |   |   |   | T4KIN1  | T4KIN1  | T4KIN2       | T4KIN2       | T4KIN3       | T4KIN3       | T4KIN4       | T4KIN4       |
| B |   |   |   |   | T4KIS11 | T4KIS11 | T4KIS12      | T4KIS12      | T4KIS13      | T4KIS13      | T4KIS14      | T4KIS14      |
| C |   |   |   |   | T4KIS21 | T4KIS21 | T4KIS22      | T4KIS22      | T4KIS23      | T4KIS23      | T4KIS24      | T4KIS24      |
| D |   |   |   |   | T5KIN1  | T5KIN1  | T5KIN2       | T5KIN2       | T5KIN3       | T5KIN3       | T5KIN4       | T5KIN4       |
| E |   |   |   |   | T5KIS11 | T5KIS11 | T5KIS12      | T5KIS12      | T5KIS13      | T5KIS13      | T5KIS14      | T5KIS14      |
| F |   |   |   |   | T5KIS21 | T5KIS21 | T5KIS22      | T5KIS22      | T5KIS23      | T5KIS23      | T5KIS24      | T5KIS24      |
| G |   |   |   |   |         |         | Blank PEG    | Blank PEG    | Blank PEG    | Blank PEG    | Blank PEG    | Blank PEG    |
| H |   |   |   |   |         |         | Blank no PEG | Blank no PEG | Blank no PEG | Blank no PEG | Blank no PEG | Blank no PEG |

Comment:

alle Messwerte bei lin low

Date Operator Date Control



|              |       |     |   |   |              |         |     |         |
|--------------|-------|-----|---|---|--------------|---------|-----|---------|
| T5KIIN3      | T4/T5 | D10 | 0 | 0 | kleiner LLOQ | #VALUE! | 143 | #VALUE! |
| T5KIIN4      | T4/T5 | D11 | 0 | 0 | kleiner LLOQ | #VALUE! | 144 | #VALUE! |
| T5KIIN4      | T4/T5 | D12 | 0 | 0 | kleiner LLOQ | #VALUE! | 145 | #VALUE! |
| 0            | T4/T5 | E01 | 0 | 0 | kleiner LLOQ | #VALUE! | 146 | #VALUE! |
| 0            | T4/T5 | E02 | 0 | 0 | kleiner LLOQ | #VALUE! | 147 | #VALUE! |
| 0            | T4/T5 | E03 | 0 | 0 | kleiner LLOQ | #VALUE! | 148 | #VALUE! |
| 0            | T4/T5 | E04 | 0 | 0 | kleiner LLOQ | #VALUE! | 149 | #VALUE! |
| T5KIS11      | T4/T5 | E05 | 0 | 0 | kleiner LLOQ | #VALUE! | 150 | #VALUE! |
| T5KIS11      | T4/T5 | E06 | 0 | 0 | kleiner LLOQ | #VALUE! | 151 | #VALUE! |
| T5KIS12      | T4/T5 | E07 | 0 | 0 | kleiner LLOQ | #VALUE! | 152 | #VALUE! |
| T5KIS12      | T4/T5 | E08 | 0 | 0 | kleiner LLOQ | #VALUE! | 153 | #VALUE! |
| T5KIS13      | T4/T5 | E09 | 0 | 0 | kleiner LLOQ | #VALUE! | 154 | #VALUE! |
| T5KIS13      | T4/T5 | E10 | 0 | 0 | kleiner LLOQ | #VALUE! | 155 | #VALUE! |
| T5KIS14      | T4/T5 | E11 | 0 | 0 | kleiner LLOQ | #VALUE! | 156 | #VALUE! |
| T5KIS14      | T4/T5 | E12 | 0 | 0 | kleiner LLOQ | #VALUE! | 157 | #VALUE! |
| 0            | T4/T5 | F01 | 0 | 0 | kleiner LLOQ | #VALUE! | 158 | #VALUE! |
| 0            | T4/T5 | F02 | 0 | 0 | kleiner LLOQ | #VALUE! | 159 | #VALUE! |
| 0            | T4/T5 | F03 | 0 | 0 | kleiner LLOQ | #VALUE! | 160 | #VALUE! |
| 0            | T4/T5 | F04 | 0 | 0 | kleiner LLOQ | #VALUE! | 161 | #VALUE! |
| T5KIS21      | T4/T5 | F05 | 0 | 0 | kleiner LLOQ | #VALUE! | 162 | #VALUE! |
| T5KIS21      | T4/T5 | F06 | 0 | 0 | kleiner LLOQ | #VALUE! | 163 | #VALUE! |
| T5KIS22      | T4/T5 | F07 | 0 | 0 | kleiner LLOQ | #VALUE! | 164 | #VALUE! |
| T5KIS22      | T4/T5 | F08 | 0 | 0 | kleiner LLOQ | #VALUE! | 165 | #VALUE! |
| T5KIS23      | T4/T5 | F09 | 0 | 0 | kleiner LLOQ | #VALUE! | 166 | #VALUE! |
| T5KIS23      | T4/T5 | F10 | 0 | 0 | kleiner LLOQ | #VALUE! | 167 | #VALUE! |
| T5KIS24      | T4/T5 | F11 | 0 | 0 | kleiner LLOQ | #VALUE! | 168 | #VALUE! |
| T5KIS24      | T4/T5 | F12 | 0 | 0 | kleiner LLOQ | #VALUE! | 169 | #VALUE! |
| 0            | T4/T5 | G01 | 0 | 0 | kleiner LLOQ | #VALUE! | 170 | #VALUE! |
| 0            | T4/T5 | G02 | 0 | 0 | kleiner LLOQ | #VALUE! | 171 | #VALUE! |
| 0            | T4/T5 | G03 | 0 | 0 | kleiner LLOQ | #VALUE! | 172 | #VALUE! |
| 0            | T4/T5 | G04 | 0 | 0 | kleiner LLOQ | #VALUE! | 173 | #VALUE! |
| 0            | T4/T5 | G05 | 0 | 0 | kleiner LLOQ | #VALUE! | 174 | #VALUE! |
| 0            | T4/T5 | G06 | 0 | 0 | kleiner LLOQ | #VALUE! | 175 | #VALUE! |
| Blank PEG    | T4/T5 | G07 | 0 | 0 | kleiner LLOQ | #VALUE! | 176 | #VALUE! |
| Blank PEG    | T4/T5 | G08 | 0 | 0 | kleiner LLOQ | #VALUE! | 177 | #VALUE! |
| Blank PEG    | T4/T5 | G09 | 0 | 0 | kleiner LLOQ | #VALUE! | 178 | #VALUE! |
| Blank PEG    | T4/T5 | G10 | 0 | 0 | kleiner LLOQ | #VALUE! | 179 | #VALUE! |
| Blank PEG    | T4/T5 | G11 | 0 | 0 | kleiner LLOQ | #VALUE! | 180 | #VALUE! |
| Blank PEG    | T4/T5 | G12 | 0 | 0 | kleiner LLOQ | #VALUE! | 181 | #VALUE! |
| 0            | T4/T5 | H01 | 0 | 0 | kleiner LLOQ | #VALUE! | 182 | #VALUE! |
| 0            | T4/T5 | H02 | 0 | 0 | kleiner LLOQ | #VALUE! | 183 | #VALUE! |
| 0            | T4/T5 | H03 | 0 | 0 | kleiner LLOQ | #VALUE! | 184 | #VALUE! |
| 0            | T4/T5 | H04 | 0 | 0 | kleiner LLOQ | #VALUE! | 185 | #VALUE! |
| 0            | T4/T5 | H05 | 0 | 0 | kleiner LLOQ | #VALUE! | 186 | #VALUE! |
| 0            | T4/T5 | H06 | 0 | 0 | kleiner LLOQ | #VALUE! | 187 | #VALUE! |
| Blank no PEG | T4/T5 | H07 | 0 | 0 | kleiner LLOQ | #VALUE! | 188 | #VALUE! |
| Blank no PEG | T4/T5 | H08 | 0 | 0 | kleiner LLOQ | #VALUE! | 189 | #VALUE! |
| Blank no PEG | T4/T5 | H09 | 0 | 0 | kleiner LLOQ | #VALUE! | 190 | #VALUE! |
| Blank no PEG | T4/T5 | H10 | 0 | 0 | kleiner LLOQ | #VALUE! | 191 | #VALUE! |
| Blank no PEG | T4/T5 | H11 | 0 | 0 | kleiner LLOQ | #VALUE! | 192 | #VALUE! |
| Blank no PEG | T4/T5 | H12 | 0 | 0 | kleiner LLOQ | #VALUE! | 193 | #VALUE! |

|         |       |     |   |   |              |         |     |         |
|---------|-------|-----|---|---|--------------|---------|-----|---------|
| 0       | T6/T7 | A01 | 0 | 0 | kleiner LLOQ | #VALUE! | 194 | #VALUE! |
| 0       | T6/T7 | A02 | 0 | 0 | kleiner LLOQ | #VALUE! | 195 | #VALUE! |
| 0       | T6/T7 | A03 | 0 | 0 | kleiner LLOQ | #VALUE! | 196 | #VALUE! |
| 0       | T6/T7 | A04 | 0 | 0 | kleiner LLOQ | #VALUE! | 197 | #VALUE! |
| T6KIN1  | T6/T7 | A05 | 0 | 0 | kleiner LLOQ | #VALUE! | 198 | #VALUE! |
| T6KIN1  | T6/T7 | A06 | 0 | 0 | kleiner LLOQ | #VALUE! | 199 | #VALUE! |
| T6KIN2  | T6/T7 | A07 | 0 | 0 | kleiner LLOQ | #VALUE! | 200 | #VALUE! |
| T6KIN2  | T6/T7 | A08 | 0 | 0 | kleiner LLOQ | #VALUE! | 201 | #VALUE! |
| T6KIN3  | T6/T7 | A09 | 0 | 0 | kleiner LLOQ | #VALUE! | 202 | #VALUE! |
| T6KIN3  | T6/T7 | A10 | 0 | 0 | kleiner LLOQ | #VALUE! | 203 | #VALUE! |
| T6KIN4  | T6/T7 | A11 | 0 | 0 | kleiner LLOQ | #VALUE! | 204 | #VALUE! |
| T6KIN4  | T6/T7 | A12 | 0 | 0 | kleiner LLOQ | #VALUE! | 205 | #VALUE! |
| 0       | T6/T7 | B01 | 0 | 0 | kleiner LLOQ | #VALUE! | 206 | #VALUE! |
| 0       | T6/T7 | B02 | 0 | 0 | kleiner LLOQ | #VALUE! | 207 | #VALUE! |
| 0       | T6/T7 | B03 | 0 | 0 | kleiner LLOQ | #VALUE! | 208 | #VALUE! |
| 0       | T6/T7 | B04 | 0 | 0 | kleiner LLOQ | #VALUE! | 209 | #VALUE! |
| T6KIS11 | T6/T7 | B05 | 0 | 0 | kleiner LLOQ | #VALUE! | 210 | #VALUE! |
| T6KIS11 | T6/T7 | B06 | 0 | 0 | kleiner LLOQ | #VALUE! | 211 | #VALUE! |
| T6KIS12 | T6/T7 | B07 | 0 | 0 | kleiner LLOQ | #VALUE! | 212 | #VALUE! |
| T6KIS12 | T6/T7 | B08 | 0 | 0 | kleiner LLOQ | #VALUE! | 213 | #VALUE! |
| T6KIS13 | T6/T7 | B09 | 0 | 0 | kleiner LLOQ | #VALUE! | 214 | #VALUE! |
| T6KIS13 | T6/T7 | B10 | 0 | 0 | kleiner LLOQ | #VALUE! | 215 | #VALUE! |
| T6KIS14 | T6/T7 | B11 | 0 | 0 | kleiner LLOQ | #VALUE! | 216 | #VALUE! |
| T6KIS14 | T6/T7 | B12 | 0 | 0 | kleiner LLOQ | #VALUE! | 217 | #VALUE! |
| 0       | T6/T7 | C01 | 0 | 0 | kleiner LLOQ | #VALUE! | 218 | #VALUE! |
| 0       | T6/T7 | C02 | 0 | 0 | kleiner LLOQ | #VALUE! | 219 | #VALUE! |
| 0       | T6/T7 | C03 | 0 | 0 | kleiner LLOQ | #VALUE! | 220 | #VALUE! |
| 0       | T6/T7 | C04 | 0 | 0 | kleiner LLOQ | #VALUE! | 221 | #VALUE! |
| T6KIS21 | T6/T7 | C05 | 0 | 0 | kleiner LLOQ | #VALUE! | 222 | #VALUE! |
| T6KIS21 | T6/T7 | C06 | 0 | 0 | kleiner LLOQ | #VALUE! | 223 | #VALUE! |
| T6KIS22 | T6/T7 | C07 | 0 | 0 | kleiner LLOQ | #VALUE! | 224 | #VALUE! |
| T6KIS22 | T6/T7 | C08 | 0 | 0 | kleiner LLOQ | #VALUE! | 225 | #VALUE! |
| T6KIS23 | T6/T7 | C09 | 0 | 0 | kleiner LLOQ | #VALUE! | 226 | #VALUE! |
| T6KIS23 | T6/T7 | C10 | 0 | 0 | kleiner LLOQ | #VALUE! | 227 | #VALUE! |
| T6KIS24 | T6/T7 | C11 | 0 | 0 | kleiner LLOQ | #VALUE! | 228 | #VALUE! |
| T6KIS24 | T6/T7 | C12 | 0 | 0 | kleiner LLOQ | #VALUE! | 229 | #VALUE! |
| 0       | T6/T7 | D01 | 0 | 0 | kleiner LLOQ | #VALUE! | 230 | #VALUE! |
| 0       | T6/T7 | D02 | 0 | 0 | kleiner LLOQ | #VALUE! | 231 | #VALUE! |
| 0       | T6/T7 | D03 | 0 | 0 | kleiner LLOQ | #VALUE! | 232 | #VALUE! |
| 0       | T6/T7 | D04 | 0 | 0 | kleiner LLOQ | #VALUE! | 233 | #VALUE! |
| T7KIN1  | T6/T7 | D05 | 0 | 0 | kleiner LLOQ | #VALUE! | 234 | #VALUE! |
| T7KIN1  | T6/T7 | D06 | 0 | 0 | kleiner LLOQ | #VALUE! | 235 | #VALUE! |
| T7KIN2  | T6/T7 | D07 | 0 | 0 | kleiner LLOQ | #VALUE! | 236 | #VALUE! |
| T7KIN2  | T6/T7 | D08 | 0 | 0 | kleiner LLOQ | #VALUE! | 237 | #VALUE! |
| T7KIN3  | T6/T7 | D09 | 0 | 0 | kleiner LLOQ | #VALUE! | 238 | #VALUE! |
| T7KIN3  | T6/T7 | D10 | 0 | 0 | kleiner LLOQ | #VALUE! | 239 | #VALUE! |
| T7KIN4  | T6/T7 | D11 | 0 | 0 | kleiner LLOQ | #VALUE! | 240 | #VALUE! |
| T7KIN4  | T6/T7 | D12 | 0 | 0 | kleiner LLOQ | #VALUE! | 241 | #VALUE! |
| 0       | T6/T7 | E01 | 0 | 0 | kleiner LLOQ | #VALUE! | 242 | #VALUE! |

Plate: T6/T7

|   |   |   |   |   |   |   |   |   |   |    |    |    |
|---|---|---|---|---|---|---|---|---|---|----|----|----|
|   | 1 | 2 | 3 | 4 | 5 | 6 | 7 | 8 | 9 | 10 | 11 | 12 |
| A |   |   |   |   |   |   |   |   |   |    |    |    |
| B |   |   |   |   |   |   |   |   |   |    |    |    |
| C |   |   |   |   |   |   |   |   |   |    |    |    |
| D |   |   |   |   |   |   |   |   |   |    |    |    |
| E |   |   |   |   |   |   |   |   |   |    |    |    |
| F |   |   |   |   |   |   |   |   |   |    |    |    |
| G |   |   |   |   |   |   |   |   |   |    |    |    |
| H |   |   |   |   |   |   |   |   |   |    |    |    |

Plattenbelegung

|   |   |   |   |   |         |         |         |         |         |         |         |         |
|---|---|---|---|---|---------|---------|---------|---------|---------|---------|---------|---------|
|   | 1 | 2 | 3 | 4 | 5       | 6       | 7       | 8       | 9       | 10      | 11      | 12      |
| A |   |   |   |   | T6KIN1  | T6KIN1  | T6KIN2  | T6KIN2  | T6KIN3  | T6KIN3  | T6KIN4  | T6KIN4  |
| B |   |   |   |   | T6KIS11 | T6KIS11 | T6KIS12 | T6KIS12 | T6KIS13 | T6KIS13 | T6KIS14 | T6KIS14 |
| C |   |   |   |   | T6KIS21 | T6KIS21 | T6KIS22 | T6KIS22 | T6KIS23 | T6KIS23 | T6KIS24 | T6KIS24 |
| D |   |   |   |   | T7KIN1  | T7KIN1  | T7KIN2  | T7KIN2  | T7KIN3  | T7KIN3  | T7KIN4  | T7KIN4  |
| E |   |   |   |   | T7KIS11 | T7KIS11 | T7KIS12 | T7KIS12 | T7KIS13 | T7KIS13 | T7KIS14 | T7KIS14 |
| F |   |   |   |   | T7KIS21 | T7KIS21 | T7KIS22 | T7KIS22 | T7KIS23 | T7KIS23 | T7KIS24 | T7KIS24 |
| G |   |   |   |   |         |         |         |         |         |         |         |         |
| H |   |   |   |   |         |         |         |         |         |         |         |         |

Comment:

alle Messwerte bei lin low.

Date Operator Date Control

|         |       |     |   |   |              |         |     |         |
|---------|-------|-----|---|---|--------------|---------|-----|---------|
| 0       | T6/T7 | E02 | 0 | 0 | kleiner LLOQ | #VALUE! | 243 | #VALUE! |
| 0       | T6/T7 | E03 | 0 | 0 | kleiner LLOQ | #VALUE! | 244 | #VALUE! |
| 0       | T6/T7 | E04 | 0 | 0 | kleiner LLOQ | #VALUE! | 245 | #VALUE! |
| T7KIS11 | T6/T7 | E05 | 0 | 0 | kleiner LLOQ | #VALUE! | 246 | #VALUE! |
| T7KIS11 | T6/T7 | E06 | 0 | 0 | kleiner LLOQ | #VALUE! | 247 | #VALUE! |
| T7KIS12 | T6/T7 | E07 | 0 | 0 | kleiner LLOQ | #VALUE! | 248 | #VALUE! |
| T7KIS12 | T6/T7 | E08 | 0 | 0 | kleiner LLOQ | #VALUE! | 249 | #VALUE! |
| T7KIS13 | T6/T7 | E09 | 0 | 0 | kleiner LLOQ | #VALUE! | 250 | #VALUE! |
| T7KIS13 | T6/T7 | E10 | 0 | 0 | kleiner LLOQ | #VALUE! | 251 | #VALUE! |
| T7KIS14 | T6/T7 | E11 | 0 | 0 | kleiner LLOQ | #VALUE! | 252 | #VALUE! |
| T7KIS14 | T6/T7 | E12 | 0 | 0 | kleiner LLOQ | #VALUE! | 253 | #VALUE! |
| 0       | T6/T7 | F01 | 0 | 0 | kleiner LLOQ | #VALUE! | 254 | #VALUE! |
| 0       | T6/T7 | F02 | 0 | 0 | kleiner LLOQ | #VALUE! | 255 | #VALUE! |
| 0       | T6/T7 | F03 | 0 | 0 | kleiner LLOQ | #VALUE! | 256 | #VALUE! |
| 0       | T6/T7 | F04 | 0 | 0 | kleiner LLOQ | #VALUE! | 257 | #VALUE! |
| T7KIS21 | T6/T7 | F05 | 0 | 0 | kleiner LLOQ | #VALUE! | 258 | #VALUE! |
| T7KIS21 | T6/T7 | F06 | 0 | 0 | kleiner LLOQ | #VALUE! | 259 | #VALUE! |
| T7KIS22 | T6/T7 | F07 | 0 | 0 | kleiner LLOQ | #VALUE! | 260 | #VALUE! |
| T7KIS22 | T6/T7 | F08 | 0 | 0 | kleiner LLOQ | #VALUE! | 261 | #VALUE! |
| T7KIS23 | T6/T7 | F09 | 0 | 0 | kleiner LLOQ | #VALUE! | 262 | #VALUE! |
| T7KIS23 | T6/T7 | F10 | 0 | 0 | kleiner LLOQ | #VALUE! | 263 | #VALUE! |
| T7KIS24 | T6/T7 | F11 | 0 | 0 | kleiner LLOQ | #VALUE! | 264 | #VALUE! |
| T7KIS24 | T6/T7 | F12 | 0 | 0 | kleiner LLOQ | #VALUE! | 265 | #VALUE! |
| 0       | T6/T7 | G01 | 0 | 0 | kleiner LLOQ | #VALUE! | 266 | #VALUE! |
| 0       | T6/T7 | G02 | 0 | 0 | kleiner LLOQ | #VALUE! | 267 | #VALUE! |
| 0       | T6/T7 | G03 | 0 | 0 | kleiner LLOQ | #VALUE! | 268 | #VALUE! |
| 0       | T6/T7 | G04 | 0 | 0 | kleiner LLOQ | #VALUE! | 269 | #VALUE! |
| 0       | T6/T7 | G05 | 0 | 0 | kleiner LLOQ | #VALUE! | 270 | #VALUE! |
| 0       | T6/T7 | G06 | 0 | 0 | kleiner LLOQ | #VALUE! | 271 | #VALUE! |
| 0       | T6/T7 | G07 | 0 | 0 | kleiner LLOQ | #VALUE! | 272 | #VALUE! |
| 0       | T6/T7 | G08 | 0 | 0 | kleiner LLOQ | #VALUE! | 273 | #VALUE! |
| 0       | T6/T7 | G09 | 0 | 0 | kleiner LLOQ | #VALUE! | 274 | #VALUE! |
| 0       | T6/T7 | G10 | 0 | 0 | kleiner LLOQ | #VALUE! | 275 | #VALUE! |
| 0       | T6/T7 | G11 | 0 | 0 | kleiner LLOQ | #VALUE! | 276 | #VALUE! |
| 0       | T6/T7 | G12 | 0 | 0 | kleiner LLOQ | #VALUE! | 277 | #VALUE! |
| 0       | T6/T7 | H01 | 0 | 0 | kleiner LLOQ | #VALUE! | 278 | #VALUE! |
| 0       | T6/T7 | H02 | 0 | 0 | kleiner LLOQ | #VALUE! | 279 | #VALUE! |
| 0       | T6/T7 | H03 | 0 | 0 | kleiner LLOQ | #VALUE! | 280 | #VALUE! |
| 0       | T6/T7 | H04 | 0 | 0 | kleiner LLOQ | #VALUE! | 281 | #VALUE! |
| 0       | T6/T7 | H05 | 0 | 0 | kleiner LLOQ | #VALUE! | 282 | #VALUE! |
| 0       | T6/T7 | H06 | 0 | 0 | kleiner LLOQ | #VALUE! | 283 | #VALUE! |
| 0       | T6/T7 | H07 | 0 | 0 | kleiner LLOQ | #VALUE! | 284 | #VALUE! |
| 0       | T6/T7 | H08 | 0 | 0 | kleiner LLOQ | #VALUE! | 285 | #VALUE! |
| 0       | T6/T7 | H09 | 0 | 0 | kleiner LLOQ | #VALUE! | 286 | #VALUE! |
| 0       | T6/T7 | H10 | 0 | 0 | kleiner LLOQ | #VALUE! | 287 | #VALUE! |
| 0       | T6/T7 | H11 | 0 | 0 | kleiner LLOQ | #VALUE! | 288 | #VALUE! |
| 0       | T6/T7 | H12 | 0 | 0 | kleiner LLOQ | #VALUE! | 289 | #VALUE! |

|       |       |       |       |       |       |       |       |       |       |       |       |
|-------|-------|-------|-------|-------|-------|-------|-------|-------|-------|-------|-------|
| 1.447 | 1.739 |       | 1.170 |       |       |       |       |       | 0.667 | 0.440 | 0.043 |
| 1.447 | 1.332 |       | 1.392 | 0.137 | 0.146 | 0.130 | 0.138 | 0.109 | 0.729 | 0.478 | 0.042 |
| 1.391 | 1.281 |       | 1.311 | 0.204 | 0.184 | 0.184 | 0.198 | 0.201 | 0.743 | 0.474 | 0.043 |
| 0.961 | 0.835 |       | 1.405 | 0.336 | 0.347 | 0.375 | 0.387 | 0.300 | 0.824 | 0.483 | 0.044 |
| 0.445 | 0.441 |       | 1.280 | 1.085 | 1.086 | 1.218 | 1.004 | 0.873 | 0.704 | 0.457 | 0.041 |
| 0.355 | 0.315 |       | 1.332 | 1.768 | 1.925 | 1.753 | 1.739 | 1.606 |       |       | 0.036 |
| 0.223 | 0.188 | 1.666 | 1.499 | 1.632 |       | 0.048 | 0.046 | 0.047 | 0.048 | 0.048 | 0.048 |
| 0.118 | 0.106 | 1.556 | 1.622 | 1.573 |       | 0.047 | 0.054 | 0.051 | 0.051 | 0.052 | 0.051 |

1

|       |       |       |       |       |       |       |       |       |       |       |       |
|-------|-------|-------|-------|-------|-------|-------|-------|-------|-------|-------|-------|
| 1.652 | 1.627 |       | 1.188 | 0.748 | 0.811 | 0.764 | 0.753 | 0.674 | 0.751 | 0.529 | 0.044 |
| 1.443 | 1.372 |       | 1.364 | 0.139 | 0.147 | 0.131 | 0.139 | 0.110 | 0.811 | 0.561 | 0.043 |
| 1.377 | 1.281 |       | 1.284 | 0.206 | 0.189 | 0.184 | 0.200 | 0.202 | 0.821 | 0.560 | 0.044 |
| 0.972 | 0.883 |       | 1.387 | 0.339 | 0.349 | 0.386 | 0.406 | 0.312 | 0.903 | 0.565 | 0.044 |
| 0.484 | 0.474 |       | 1.298 | 1.087 | 1.113 | 1.203 | 1.022 | 0.903 | 0.790 | 0.544 | 0.042 |
| 0.359 | 0.326 |       | 1.308 | 1.622 | 1.622 | 1.630 | 1.625 | 1.550 |       |       | 0.037 |
| 0.228 | 0.199 | 1.527 | 1.373 | 1.462 |       | 0.048 | 0.046 | 0.048 | 0.049 | 0.049 | 0.049 |
| 0.125 | 0.109 | 1.473 | 1.410 | 1.371 |       | 0.048 | 0.054 | 0.052 | 0.052 | 0.052 | 0.051 |

2

|       |       |       |       |       |       |       |       |       |       |       |       |
|-------|-------|-------|-------|-------|-------|-------|-------|-------|-------|-------|-------|
| 1.579 | 1.475 |       | 1.150 | 1.210 | 1.303 | 1.202 | 1.219 | 1.125 | 0.759 | 0.549 | 0.043 |
| 1.357 | 1.303 |       | 1.283 | 0.140 | 0.148 | 0.131 | 0.139 | 0.111 | 0.820 | 0.575 | 0.043 |
| 1.323 | 1.228 |       | 1.227 | 0.206 | 0.188 | 0.184 | 0.198 | 0.201 | 0.824 | 0.579 | 0.043 |
| 0.959 | 0.872 |       | 1.321 | 0.339 | 0.348 | 0.387 | 0.406 | 0.314 | 0.909 | 0.580 | 0.044 |
| 0.483 | 0.473 |       | 1.270 | 1.069 | 1.103 | 1.181 | 1.017 | 0.903 | 0.798 | 0.560 | 0.042 |
| 0.360 | 0.326 |       | 1.270 | 1.497 | 1.448 | 1.496 | 1.494 | 1.449 |       |       | 0.037 |
| 0.228 | 0.199 | 1.374 | 1.262 | 1.314 |       | 0.048 | 0.046 | 0.048 | 0.049 | 0.049 | 0.049 |
| 0.125 | 0.110 | 1.346 | 1.262 | 1.253 |       | 0.048 | 0.054 | 0.052 | 0.052 | 0.052 | 0.051 |

3

|       |       |  |  |       |       |       |       |       |       |       |       |
|-------|-------|--|--|-------|-------|-------|-------|-------|-------|-------|-------|
| 1.511 | 1.369 |  |  | 1.538 | 1.712 | 1.528 | 1.502 | 1.425 |       |       | 0.043 |
| 1.296 | 1.281 |  |  |       |       |       |       |       |       |       | 0.043 |
| 1.272 | 1.193 |  |  |       |       |       |       |       |       |       | 0.043 |
| 0.947 | 0.859 |  |  |       |       |       |       |       |       |       | 0.044 |
| 0.481 | 0.471 |  |  |       |       |       |       |       |       |       | 0.042 |
| 0.361 | 0.325 |  |  |       |       |       |       |       |       |       | 0.037 |
| 0.229 | 0.199 |  |  |       |       | 0.048 | 0.046 | 0.048 | 0.049 | 0.049 | 0.049 |
| 0.125 | 0.110 |  |  |       |       | 0.047 | 0.054 | 0.052 | 0.052 | 0.052 | 0.051 |

4

|       |       |       |       |       |       |       |       |       |       |       |       |
|-------|-------|-------|-------|-------|-------|-------|-------|-------|-------|-------|-------|
| 1.493 | 1.317 | 1.678 | 1.110 | 1.621 | 1.807 | 1.618 | 1.584 | 1.508 | 0.765 | 0.597 | 0.043 |
| 1.259 | 1.238 | 1.850 | 1.197 | 0.139 | 0.150 | 0.132 | 0.139 | 0.111 | 0.821 | 0.588 | 0.043 |
| 1.248 | 1.175 | 1.816 | 1.153 | 0.204 | 0.188 | 0.184 | 0.197 | 0.199 | 0.831 | 0.599 | 0.044 |
| 0.943 | 0.859 | 1.970 | 1.231 | 0.338 | 0.357 | 0.386 | 0.406 | 0.316 | 0.916 | 0.595 | 0.044 |
| 0.480 | 0.470 | 2.220 | 1.220 | 1.054 | 1.088 | 1.154 | 1.006 | 0.902 | 0.805 | 0.579 | 0.042 |
| 0.359 | 0.325 | 2.149 | 1.211 | 1.395 | 1.324 | 1.348 | 1.345 | 1.317 | 0.037 | 0.037 | 0.037 |
| 0.228 | 0.199 | 1.240 | 1.151 | 1.183 | 0.034 | 0.049 | 0.046 | 0.048 | 0.049 | 0.049 | 0.049 |
| 0.125 | 0.110 | 1.223 | 1.132 | 1.146 | 0.038 | 0.048 | 0.054 | 0.052 | 0.052 | 0.052 | 0.051 |

5

falsch gedrückt, jedes well ob leer oder voll gemessen

|       |       |  |       |       |       |       |       |       |       |       |       |
|-------|-------|--|-------|-------|-------|-------|-------|-------|-------|-------|-------|
| 1.434 | 1.258 |  | 1.090 | 1.648 | 1.876 | 1.649 | 1.627 | 1.535 |       |       |       |
| 1.217 | 1.201 |  | 1.149 |       |       |       |       |       |       |       |       |
| 1.205 | 1.143 |  | 1.109 |       |       |       |       |       |       |       |       |
| 0.935 | 0.845 |  | 1.182 |       |       |       |       |       |       |       |       |
| 0.477 | 0.469 |  | 1.181 |       |       |       |       |       |       |       |       |
| 0.360 | 0.323 |  | 1.167 |       |       |       |       |       |       |       |       |
| 0.229 | 0.200 |  |       |       |       | 0.049 | 0.047 | 0.048 | 0.049 | 0.049 | 0.049 |
| 0.125 | 0.110 |  |       |       |       | 0.048 | 0.054 | 0.052 | 0.052 | 0.052 | 0.051 |

6

|       |       |       |       |       |       |       |       |       |       |       |       |
|-------|-------|-------|-------|-------|-------|-------|-------|-------|-------|-------|-------|
| 1.013 | 0.810 |       | 0.668 | 0.808 | 0.940 | 0.720 | 0.798 | 0.687 | 0.904 | 0.845 | 0.043 |
| 0.709 | 0.827 |       | 0.703 | 0.142 | 0.156 | 0.136 | 0.137 | 0.116 | 0.990 | 0.846 | 0.042 |
| 0.682 | 0.692 |       | 0.680 | 0.197 | 0.188 | 0.190 | 0.191 | 0.184 | 1.023 | 0.861 | 0.043 |
| 0.507 | 0.519 |       | 0.740 | 0.316 | 0.264 | 0.364 | 0.377 | 0.312 | 1.111 | 0.870 | 0.043 |
| 0.394 | 0.406 |       | 0.682 | 0.580 | 0.561 | 0.600 | 0.529 | 0.563 | 0.962 | 0.834 | 0.042 |
| 0.333 | 0.322 |       | 0.661 | 0.995 | 0.930 | 0.848 | 0.832 | 0.797 | 0.037 | 0.037 | 0.037 |
| 0.229 | 0.201 | 0.843 | 0.679 | 0.732 |       | 0.048 | 0.046 | 0.047 |       |       | 0.047 |
| 0.124 | 0.111 | 0.773 | 0.682 | 0.701 |       | 0.047 | 0.053 | 0.051 | 0.051 | 0.052 | 0.051 |

messung am nächsten tag, ca 24 h, bei 4°C

skin cultivation

|       |       |       |       |  |  |       |       |       |       |       |       |            |
|-------|-------|-------|-------|--|--|-------|-------|-------|-------|-------|-------|------------|
| 3.015 | 3.090 | 3.028 | 0.727 |  |  |       |       |       |       |       |       | T0/T1 1 hd |
| 3.134 | 3.069 | 3.065 | 0.655 |  |  |       |       |       |       |       |       |            |
| 3.055 | 3.129 | 3.032 | 0.418 |  |  |       |       |       |       |       |       |            |
| 2.613 | 2.463 | 2.221 | 0.192 |  |  |       |       |       |       |       |       |            |
| 2.914 | 2.846 | 2.705 | 0.363 |  |  |       |       |       |       |       |       |            |
| 2.618 | 2.492 | 2.513 | 0.185 |  |  |       |       |       |       |       |       |            |
|       |       |       |       |  |  | 0.049 | 0.050 | 0.048 | 0.047 | 0.049 | 0.049 |            |
|       |       |       |       |  |  | 0.048 | 0.047 | 0.047 | 0.047 | 0.047 | 0.048 |            |

|  |  |  |  |       |       |       |       |       |       |       |       |            |
|--|--|--|--|-------|-------|-------|-------|-------|-------|-------|-------|------------|
|  |  |  |  | 0.799 | 0.787 | 0.982 | 0.987 | 0.954 | 1.024 | 0.192 | 0.198 | T0/T1 2 hd |
|  |  |  |  | 1.344 | 1.340 | 0.343 | 0.772 | 0.624 | 0.875 | 0.228 | 0.278 |            |
|  |  |  |  | 0.616 | 0.793 | 1.173 | 1.385 | 0.942 | 0.950 | 0.173 | 0.188 |            |
|  |  |  |  | 0.461 | 0.435 | 0.387 | 0.371 | 0.386 | 0.389 | 0.128 | 0.131 |            |
|  |  |  |  | 0.644 | 0.656 | 0.482 | 0.491 | 0.431 | 0.422 | 0.171 | 0.166 |            |
|  |  |  |  | 0.150 | 0.150 | 0.189 | 0.191 | 0.155 | 0.154 | 0.055 | 0.127 |            |
|  |  |  |  |       |       | 0.050 | 0.051 | 0.049 | 0.045 | 0.047 | 0.049 |            |
|  |  |  |  |       |       | 0.049 | 0.048 | 0.048 | 0.048 | 0.048 | 0.048 |            |



|  |  |  |  |       |       |       |       |       |       |       |       |            |
|--|--|--|--|-------|-------|-------|-------|-------|-------|-------|-------|------------|
|  |  |  |  | 0.447 | 0.456 | 0.457 | 0.463 | 0.586 | 0.600 | 0.072 | 0.072 | T4/T5 2 hd |
|  |  |  |  | 0.284 | 0.281 | 0.290 | 0.292 | 0.692 | 0.864 | 0.065 | 0.065 |            |
|  |  |  |  | 0.415 | 0.429 | 0.475 | 0.532 | 0.663 | 0.665 | 0.061 | 0.061 |            |
|  |  |  |  | 0.393 | 0.384 | 0.612 | 0.607 | 0.359 | 0.425 | 0.059 | 0.058 |            |
|  |  |  |  | 0.184 | 0.278 | 0.529 | 0.715 | 0.218 | 0.232 | 0.059 | 0.059 |            |
|  |  |  |  | 0.496 | 0.489 | 0.103 | 0.201 | 0.106 | 0.120 | 0.054 | 0.054 |            |
|  |  |  |  |       |       | 0.050 | 0.050 | 0.051 | 0.050 | 0.050 | 0.050 |            |
|  |  |  |  |       |       | 0.050 | 0.050 | 0.050 | 0.048 | 0.049 | 0.049 |            |

|       |       |       |       |  |  |       |       |       |       |       |       |            |
|-------|-------|-------|-------|--|--|-------|-------|-------|-------|-------|-------|------------|
| 0.505 | 0.546 | 0.291 | 0.060 |  |  |       |       |       |       |       |       | T6/T7 1 hd |
| 0.125 | 0.436 | 0.461 | 0.061 |  |  |       |       |       |       |       |       |            |
| 0.473 | 0.159 | 0.127 | 0.057 |  |  |       |       |       |       |       |       |            |
| 0.542 | 0.422 | 0.111 | 0.055 |  |  |       |       |       |       |       |       |            |
| 0.081 | 0.114 | 0.133 | 0.055 |  |  |       |       |       |       |       |       |            |
| 0.331 | 0.117 | 0.142 | 0.054 |  |  |       |       |       |       |       |       |            |
|       |       |       |       |  |  | 0.048 | 0.049 | 0.049 | 0.049 | 0.050 | 0.050 |            |
|       |       |       |       |  |  | 0.049 | 0.049 | 0.049 | 0.044 | 0.050 | 0.048 |            |

|  |  |  |  |       |       |       |       |       |       |       |       |            |
|--|--|--|--|-------|-------|-------|-------|-------|-------|-------|-------|------------|
|  |  |  |  | 0.512 | 0.468 | 0.489 | 0.547 | 0.192 | 0.205 | 0.062 | 0.070 | T6/T7 2 hd |
|  |  |  |  | 0.154 | 0.226 | 0.460 | 0.263 | 0.214 | 0.401 | 0.060 | 0.059 |            |
|  |  |  |  | 0.396 | 0.411 | 0.166 | 0.172 | 0.128 | 0.135 | 0.056 | 0.060 |            |
|  |  |  |  | 0.443 | 0.450 | 0.369 | 0.418 | 0.111 | 0.107 | 0.057 | 0.060 |            |
|  |  |  |  | 0.064 | 0.062 | 0.091 | 0.158 | 0.098 | 0.156 | 0.057 | 0.058 |            |
|  |  |  |  | 0.243 | 0.304 | 0.097 | 0.142 | 0.139 | 0.137 | 0.055 | 0.054 |            |
|  |  |  |  |       |       | 0.049 | 0.052 | 0.052 | 0.051 | 0.052 | 0.051 |            |
|  |  |  |  |       |       | 0.050 | 0.050 | 0.050 | 0.045 | 0.051 | 0.050 |            |



|                    |              |                              |                         |                            |                              |
|--------------------|--------------|------------------------------|-------------------------|----------------------------|------------------------------|
| Project number     | F-120        | Apparatus                    | Wallac Victor           | Operator                   | IsBa                         |
| GLP Study (Number) | n.a.         | Protocol (instrument method) | LDH test 2016           | Date of preparation        | 19-04-18                     |
| hot substance      | isotope      | n.a.                         | File name (results)     | IsBa_180419/20_LDH_full_v2 | Date of measurement          |
|                    | name         | n.a.                         | Kind of well plate      | 96 well                    | shaking time [min]           |
| cold substance     | ACB-ID       | n.a.                         | sample volume [µL]      | 100                        | stirring rate (Target) [rpm] |
|                    | Batch number | n.a.                         | Cocktail volume [µL]    | 175                        | Kind of measurement          |
| n.a.               | name         | LDH                          | ACB-ID of cocktail      |                            | Wave length [nm]             |
|                    | ACB-ID       | L23982R                      | Matrix                  | DMEM (from powder)+PEG     | Remarks                      |
| n.a.               | Batch number | SLBK6345V                    | Blank description       | DMEM/PEG, H2O              | Remarks                      |
|                    | n.a.         | n.a.                         | Pipettes (No. / volume) | 50-200µl                   | Remarks                      |
| n.a.               | n.a.         | Pipettes (No. / volume)      | n.a.                    | Remarks                    | n.a.                         |

Messdaten (diese Tabelle in Bericht übernehmen)

| Sample name * | concentration (theor.) * | measured data | measured data | measured data | mean measured | SD    | RSD  | Blank * | measured data after * Blank subtraction | concentration (calc.) * | Deviation * | Residuen |
|---------------|--------------------------|---------------|---------------|---------------|---------------|-------|------|---------|-----------------------------------------|-------------------------|-------------|----------|
|               | [µg/mL]                  | [AU]          | [AU]          | [AU]          | [AU]          | [AU]  | [%]  | [AU]    |                                         | [µg/mL]                 | [%]         |          |
| KLP1          |                          |               |               |               |               |       |      | 0.047   |                                         |                         |             |          |
| KLP2          |                          |               |               |               |               |       |      | 0.054   |                                         |                         |             |          |
| KLP3          |                          |               |               |               |               |       |      | 0.051   |                                         |                         |             |          |
| KLP4          | 0.041                    | 0.959         | 0.972         | 0.883         | 0.938         | 0.04  | 4.19 | 0.051   | 0.887                                   | 0.041                   | -0.57       | 0.00     |
| KLP5          | 0.018                    | 0.483         | 0.484         | 0.474         | 0.480         | 0.00  | 0.98 | 0.052   | 0.429                                   | 0.019                   | 2.42        | 0.00     |
| KLP6          | 0.012                    | 0.360         | 0.359         | 0.326         | 0.348         | 0.02  | 4.54 | 0.051   | 0.297                                   | 0.013                   | 5.00        | 0.00     |
| KLP7          | 0.007                    | 0.228         | 0.228         | 0.199         | 0.218         | 0.014 | 6.35 |         | 0.168                                   | 0.006                   | -11.29      | 0.00     |
| KLP8          |                          |               |               |               |               |       |      |         |                                         |                         |             |          |

Statistical data

|                                              |                                          |                     |              |
|----------------------------------------------|------------------------------------------|---------------------|--------------|
| Geradensteigung                              | Slope                                    | m                   | 21.03        |
| Y-Achsenabschnitt                            | Y-Intercept                              | b                   | 0.03         |
| Standardabw. Geradensteigung                 | SD-Slope                                 | S <sub>m</sub>      | 0.648055501  |
| Standardabw. Achsenabschnittes               | SD-Y-Intercept                           | S <sub>b</sub>      | 0.015177452  |
| Anzahl Messpunkte                            | number of measuring points               | n                   | 4            |
| Quadratsumme                                 | sum of squares                           | Q <sub>xx</sub>     | 0.000664046  |
| Bereichsmittle                               |                                          |                     | 0.019557193  |
| Freiheitsgrade                               | degree of freedom                        | f                   | 2            |
| Student-t-Faktor für (P = 95 %; f = n-2)     | Student-t-factor for (P = 95 %; f = n-2) | t                   | 4.303        |
| Vertrauensbereich Steig. (95 %) Obergrenze   |                                          | m + VB <sub>m</sub> | 23.81763508  |
| Vertrauensbereich Steig. (95 %) Untergrenze  |                                          | m - VB <sub>m</sub> | 18.24046944  |
| Vertrauensbereich Achsenabschnitt (95 %) Og. |                                          | b + VB <sub>b</sub> | 0.099335829  |
| Vertrauensbereich Achsenabschnitt (95 %) Ug. |                                          | b - VB <sub>b</sub> | -0.031281327 |
| Korrelationskoeffizient                      | correlation coefficient                  | r                   | 0.9991       |
| Bestimmtheitsmaß                             | determination coefficient                | r <sup>2</sup>      | 0.9981       |
| Reststandardabweichung                       |                                          | S <sub>0</sub>      | 0.01669983   |
| Summe Restquadrate                           |                                          | sd                  | 0.657385838  |
| Verfahrensstandardabw.                       |                                          | S <sub>00</sub>     | 0.000794131  |
| Rel. Verfahrensstandardabw. %                |                                          | V <sub>00</sub>     | 4.060559029  |

Berichten

|                          |       |
|--------------------------|-------|
| mean Blank               | 0     |
| SD Blank                 | 0.00  |
| RSD Blank                | 3.79  |
| x <sup>2</sup> SD (LLOQ) | 0.01  |
| x <sup>2</sup> SD (LOD)  | 0.01  |
| LLOQ (AU)                | 0.061 |
| LOD (AU)                 | 0.067 |
| ULOQ                     | 0.887 |
| LLOQ (Lin)               | 0.168 |

Evaluation / Comment

LDH linearity valid with 7 standards, split in lin high and lin low, each with 4 standards and KLP4 common standard for both. R<sup>2</sup> 0,9981, deviations for both between -13.34% and +13.04%

Date Operator Date Operator Control

|               |  |         |               |
|---------------|--|---------|---------------|
| Formblatt-Nr. |  | Version |               |
| Titel         |  |         |               |
| Gültig ab     |  | Ablage  | Projektordner |

Figure 1 Linearity

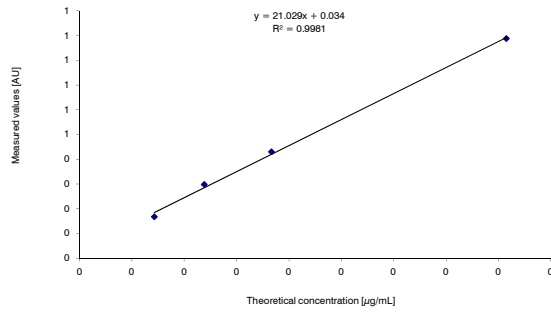

Figure 2 Method validation Residuen Plot

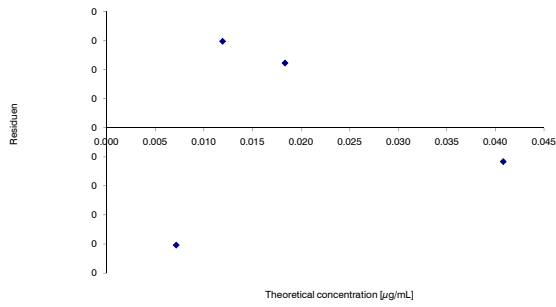

Evaluation / Comment

lin passed

Date \_\_\_\_\_ Operator \_\_\_\_\_ Date \_\_\_\_\_ Control \_\_\_\_\_

| Sample name | Plate | Position | [AU]  | [AU]-Blank | Rating       | [µg/mL] | Dilution factor | [µg/mL] |
|-------------|-------|----------|-------|------------|--------------|---------|-----------------|---------|
| 0           | T8/T9 | A01      | 0     | 0          | kleiner LLOQ | #VALUE! | 1               | #VALUE! |
| 0           | T8/T9 | A02      | 0     | 0          | kleiner LLOQ | #VALUE! | 1               | #VALUE! |
| 0           | T8/T9 | A03      | 0     | 0          | kleiner LLOQ | #VALUE! | 1               | #VALUE! |
| 0           | T8/T9 | A04      | 0     | 0          | kleiner LLOQ | #VALUE! | 1               | #VALUE! |
| T8KIN1      | T8/T9 | A05      | 0.742 | 0.691      | 0.691        | 0.031   | 2.75            | 0.09    |
| T8KIN1      | T8/T9 | A06      | 0.708 | 0.657      | 0.657        | 0.030   | 2.75            | 0.08    |
| T8KIN2      | T8/T9 | A07      | 0.415 | 0.364      | 0.364        | 0.016   | 2.75            | 0.04    |
| T8KIN2      | T8/T9 | A08      | 0.444 | 0.393      | 0.393        | 0.017   | 2.75            | 0.047   |
| T8KIN3      | T8/T9 | A09      | 0.158 | 0.107      | kleiner LLOQ | #VALUE! | 2.75            | #VALUE! |
| T8KIN3      | T8/T9 | A10      | 0.154 | 0.103      | kleiner LLOQ | #VALUE! | 2.75            | #VALUE! |
| T8KIN4      | T8/T9 | A11      | 0.055 | 0.004      | kleiner LLOQ | #VALUE! | 2.75            | #VALUE! |
| T8KIN4      | T8/T9 | A12      | 0.055 | 0.004      | kleiner LLOQ | #VALUE! | 2.75            | #VALUE! |
| 0           | T8/T9 | B01      | 0     | 0          | kleiner LLOQ | #VALUE! | 1               | #VALUE! |
| 0           | T8/T9 | B02      | 0     | 0          | kleiner LLOQ | #VALUE! | 1               | #VALUE! |
| 0           | T8/T9 | B03      | 0     | 0          | kleiner LLOQ | #VALUE! | 1               | #VALUE! |
| 0           | T8/T9 | B04      | 0     | 0          | kleiner LLOQ | #VALUE! | 1               | #VALUE! |
| T8KIS11     | T8/T9 | B05      | 0.063 | 0.012      | kleiner LLOQ | #VALUE! | 2.75            | #VALUE! |
| T8KIS11     | T8/T9 | B06      | 0.064 | 0.013      | kleiner LLOQ | #VALUE! | 2.75            | #VALUE! |
| T8KIS12     | T8/T9 | B07      | 0.221 | 0.170      | 0.170        | 0.006   | 2.75            | 0.02    |
| T8KIS12     | T8/T9 | B08      | 0.273 | 0.222      | 0.222        | 0.009   | 2.75            | 0.02    |
| T8KIS13     | T8/T9 | B09      | 0.109 | 0.058      | kleiner LLOQ | #VALUE! | 2.75            | #VALUE! |
| T8KIS13     | T8/T9 | B10      | 0.217 | 0.166      | kleiner LLOQ | #VALUE! | 2.75            | #VALUE! |
| T8KIS14     | T8/T9 | B11      | 0.074 | 0.023      | kleiner LLOQ | #VALUE! | 2.75            | #VALUE! |
| T8KIS14     | T8/T9 | B12      | 0.061 | 0.010      | kleiner LLOQ | #VALUE! | 2.75            | #VALUE! |
| 0           | T8/T9 | C01      | 0     | 0          | kleiner LLOQ | #VALUE! | 1               | #VALUE! |
| 0           | T8/T9 | C02      | 0     | 0          | kleiner LLOQ | #VALUE! | 1               | #VALUE! |
| 0           | T8/T9 | C03      | 0     | 0          | kleiner LLOQ | #VALUE! | 1               | #VALUE! |
| 0           | T8/T9 | C04      | 0     | 0          | kleiner LLOQ | #VALUE! | 1               | #VALUE! |
| T8KIS21     | T8/T9 | C05      | 0.346 | 0.295      | 0.295        | 0.012   | 2.75            | 0.03    |
| T8KIS21     | T8/T9 | C06      | 0.348 | 0.297      | 0.297        | 0.012   | 2.75            | 0.03    |
| T8KIS22     | T8/T9 | C07      | 0.086 | 0.035      | kleiner LLOQ | #VALUE! | 2.75            | #VALUE! |
| T8KIS22     | T8/T9 | C08      | 0.090 | 0.039      | kleiner LLOQ | #VALUE! | 2.75            | #VALUE! |
| T8KIS23     | T8/T9 | C09      | 0.202 | 0.151      | kleiner LLOQ | #VALUE! | 2.75            | #VALUE! |
| T8KIS23     | T8/T9 | C10      | 0.149 | 0.098      | kleiner LLOQ | #VALUE! | 2.75            | #VALUE! |
| T8KIS24     | T8/T9 | C11      | 0.061 | 0.010      | kleiner LLOQ | #VALUE! | 2.75            | #VALUE! |
| T8KIS24     | T8/T9 | C12      | 0.054 | 0.003      | kleiner LLOQ | #VALUE! | 2.75            | #VALUE! |
| 0           | T8/T9 | D01      | 0     | 0          | kleiner LLOQ | #VALUE! | 1               | #VALUE! |
| 0           | T8/T9 | D02      | 0     | 0          | kleiner LLOQ | #VALUE! | 1               | #VALUE! |
| 0           | T8/T9 | D03      | 0     | 0          | kleiner LLOQ | #VALUE! | 1               | #VALUE! |
| 0           | T8/T9 | D04      | 0     | 0          | kleiner LLOQ | #VALUE! | 1               | #VALUE! |
| T9KIN1      | T8/T9 | D05      | 0.692 | 0.641      | 0.641        | 0.029   | 2.75            | 0.08    |
| T9KIN1      | T8/T9 | D06      | 0.579 | 0.528      | 0.528        | 0.023   | 2.75            | 0.06    |
| T9KIN2      | T8/T9 | D07      | 0.503 | 0.453      | 0.453        | 0.020   | 2.75            | 0.05    |
| T9KIN2      | T8/T9 | D08      | 0.503 | 0.452      | 0.452        | 0.020   | 2.75            | 0.05    |
| T9KIN3      | T8/T9 | D09      | 0.249 | 0.198      | 0.198        | 0.008   | 2.75            | 0.02    |
| T9KIN3      | T8/T9 | D10      | 0.260 | 0.209      | 0.209        | 0.008   | 2.75            | 0.02    |
| T9KIN4      | T8/T9 | D11      | 0.146 | 0.095      | kleiner LLOQ | #VALUE! | 2.75            | #VALUE! |
| T9KIN4      | T8/T9 | D12      | 0.144 | 0.093      | kleiner LLOQ | #VALUE! | 2.75            | #VALUE! |

Plate: T8/T9

| Test | Test | Test | Test | Test  | Test  | Test  | Test  | Test  | Test  | Test  | Test  | Test | Test | Test | Test |
|------|------|------|------|-------|-------|-------|-------|-------|-------|-------|-------|------|------|------|------|
| 1    | 2    | 3    | 4    | 5     | 6     | 7     | 8     | 9     | 10    | 11    | 12    |      |      |      |      |
| A    |      |      |      | 0.742 | 0.708 | 0.415 | 0.444 | 0.158 | 0.154 | 0.055 | 0.055 |      |      |      |      |
| B    |      |      |      | 0.063 | 0.064 | 0.221 | 0.273 | 0.109 | 0.217 | 0.074 | 0.061 |      |      |      |      |
| C    |      |      |      | 0.346 | 0.348 | 0.086 | 0.090 | 0.202 | 0.149 | 0.061 | 0.054 |      |      |      |      |
| D    |      |      |      | 0.692 | 0.579 | 0.503 | 0.503 | 0.249 | 0.260 | 0.146 | 0.144 |      |      |      |      |
| E    |      |      |      | 0.037 | 0.159 | 0.164 | 0.211 | 0.209 | 0.141 | 0.109 | 0.251 |      |      |      |      |
| F    |      |      |      | 0.255 | 0.243 | 0.076 | 0.078 | 0.233 | 0.242 | 0.387 | 0.318 |      |      |      |      |
| G    |      |      |      |       |       | 0.050 | 0.043 | 0.047 | 0.050 | 0.049 | 0.047 |      |      |      |      |
| H    |      |      |      |       |       | 0.042 | 0.045 | 0.041 | 0.040 | 0.040 | 0.047 |      |      |      |      |

| Plattenbelegung | 1 | 2 | 3 | 4       | 5       | 6            | 7            | 8            | 9            | 10           | 11           | 12 |
|-----------------|---|---|---|---------|---------|--------------|--------------|--------------|--------------|--------------|--------------|----|
| A               |   |   |   | T8KIN1  | T8KIN1  | T8KIN2       | T8KIN2       | T8KIN3       | T8KIN3       | T8KIN4       | T8KIN4       |    |
| B               |   |   |   | T8KIS11 | T8KIS11 | T8KIS12      | T8KIS12      | T8KIS13      | T8KIS13      | T8KIS14      | T8KIS14      |    |
| C               |   |   |   | T8KIS21 | T8KIS21 | T8KIS22      | T8KIS22      | T8KIS23      | T8KIS23      | T8KIS24      | T8KIS24      |    |
| D               |   |   |   | T9KIN1  | T9KIN1  | T9KIN2       | T9KIN2       | T9KIN3       | T9KIN3       | T9KIN4       | T9KIN4       |    |
| E               |   |   |   | T9KIS11 | T9KIS11 | T9KIS12      | T9KIS12      | T9KIS13      | T9KIS13      | T9KIS14      | T9KIS14      |    |
| F               |   |   |   | T9KIS21 | T9KIS21 | T9KIS22      | T9KIS22      | T9KIS23      | T9KIS23      | T9KIS24      | T9KIS24      |    |
| G               |   |   |   |         |         | Blank PEG    | Blank PEG    | Blank PEG    | Blank PEG    | Blank PEG    | Blank PEG    |    |
| H               |   |   |   |         |         | Blank no PEG | Blank no PEG | Blank no PEG | Blank no PEG | Blank no PEG | Blank no PEG |    |

Samples aufgeteilt in lin high und low.höher konzentrierte Samples bei lin high zu finden.

Comment:  
erste messung verwendet

Date Operator

Date Control

|              |       |     |       |        |              |         |      |         |
|--------------|-------|-----|-------|--------|--------------|---------|------|---------|
| 0            | T8/T9 | E01 | 0     | 0      | kleiner LLOQ | #VALUE! | 1    | #VALUE! |
| 0            | T8/T9 | E02 | 0     | 0      | kleiner LLOQ | #VALUE! | 1    | #VALUE! |
| 0            | T8/T9 | E03 | 0     | 0      | kleiner LLOQ | #VALUE! | 1    | #VALUE! |
| 0            | T8/T9 | E04 | 0     | 0      | kleiner LLOQ | #VALUE! | 1    | #VALUE! |
| T9KIS11      | T8/T9 | E05 | 0.037 | -0.014 | kleiner LLOQ | #VALUE! | 2.75 | #VALUE! |
| T9KIS11      | T8/T9 | E06 | 0.159 | 0.108  | kleiner LLOQ | #VALUE! | 2.75 | #VALUE! |
| T9KIS12      | T8/T9 | E07 | 0.164 | 0.113  | kleiner LLOQ | #VALUE! | 2.75 | #VALUE! |
| T9KIS12      | T8/T9 | E08 | 0.211 | 0.160  | kleiner LLOQ | #VALUE! | 2.75 | #VALUE! |
| T9KIS13      | T8/T9 | E09 | 0.209 | 0.158  | kleiner LLOQ | #VALUE! | 2.75 | #VALUE! |
| T9KIS13      | T8/T9 | E10 | 0.141 | 0.090  | kleiner LLOQ | #VALUE! | 2.75 | #VALUE! |
| T9KIS14      | T8/T9 | E11 | 0.109 | 0.058  | kleiner LLOQ | #VALUE! | 2.75 | #VALUE! |
| T9KIS14      | T8/T9 | E12 | 0.251 | 0.200  | 0.200        | 0.008   | 2.75 | 0.02    |
| 0            | T8/T9 | F01 | 0     | 0      | kleiner LLOQ | #VALUE! | 1    | #VALUE! |
| 0            | T8/T9 | F02 | 0     | 0      | kleiner LLOQ | #VALUE! | 1    | #VALUE! |
| 0            | T8/T9 | F03 | 0     | 0      | kleiner LLOQ | #VALUE! | 1    | #VALUE! |
| 0            | T8/T9 | F04 | 0     | 0      | kleiner LLOQ | #VALUE! | 1    | #VALUE! |
| T9KIS21      | T8/T9 | F05 | 0.255 | 0.204  | 0.204        | 0.008   | 2.75 | 0.02    |
| T9KIS21      | T8/T9 | F06 | 0.243 | 0.192  | 0.192        | 0.008   | 2.75 | 0.02    |
| T9KIS22      | T8/T9 | F07 | 0.076 | 0.026  | kleiner LLOQ | #VALUE! | 2.75 | #VALUE! |
| T9KIS22      | T8/T9 | F08 | 0.078 | 0.028  | kleiner LLOQ | #VALUE! | 2.75 | #VALUE! |
| T9KIS23      | T8/T9 | F09 | 0.233 | 0.182  | 0.182        | 0.007   | 2.75 | 0.02    |
| T9KIS23      | T8/T9 | F10 | 0.242 | 0.191  | 0.191        | 0.007   | 2.75 | 0.02    |
| T9KIS24      | T8/T9 | F11 | 0.387 | 0.336  | 0.336        | 0.014   | 2.75 | 0.04    |
| T9KIS24      | T8/T9 | F12 | 0.318 | 0.268  | 0.268        | 0.011   | 2.75 | 0.03    |
| 0            | T8/T9 | G01 | 0     | 0      | kleiner LLOQ | #VALUE! | 1    | #VALUE! |
| 0            | T8/T9 | G02 | 0     | 0      | kleiner LLOQ | #VALUE! | 1    | #VALUE! |
| 0            | T8/T9 | G03 | 0     | 0      | kleiner LLOQ | #VALUE! | 1    | #VALUE! |
| 0            | T8/T9 | G04 | 0     | 0      | kleiner LLOQ | #VALUE! | 1    | #VALUE! |
| 0            | T8/T9 | G05 | 0     | 0      | kleiner LLOQ | #VALUE! | 1    | #VALUE! |
| 0            | T8/T9 | G06 | 0     | 0      | kleiner LLOQ | #VALUE! | 1    | #VALUE! |
| Blank PEG    | T8/T9 | G07 | 0     | 0      | kleiner LLOQ | #VALUE! | 2.75 | #VALUE! |
| Blank PEG    | T8/T9 | G08 | 0     | 0      | kleiner LLOQ | #VALUE! | 2.75 | #VALUE! |
| Blank PEG    | T8/T9 | G09 | 0     | 0      | kleiner LLOQ | #VALUE! | 2.75 | #VALUE! |
| Blank PEG    | T8/T9 | G10 | 0     | 0      | kleiner LLOQ | #VALUE! | 2.75 | #VALUE! |
| Blank PEG    | T8/T9 | G11 | 0     | 0      | kleiner LLOQ | #VALUE! | 2.75 | #VALUE! |
| Blank PEG    | T8/T9 | G12 | 0     | 0      | kleiner LLOQ | #VALUE! | 2.75 | #VALUE! |
| 0            | T8/T9 | H01 | 0     | 0      | kleiner LLOQ | #VALUE! | 1    | #VALUE! |
| 0            | T8/T9 | H02 | 0     | 0      | kleiner LLOQ | #VALUE! | 1    | #VALUE! |
| 0            | T8/T9 | H03 | 0     | 0      | kleiner LLOQ | #VALUE! | 1    | #VALUE! |
| 0            | T8/T9 | H04 | 0     | 0      | kleiner LLOQ | #VALUE! | 1    | #VALUE! |
| 0            | T8/T9 | H05 | 0     | 0      | kleiner LLOQ | #VALUE! | 1    | #VALUE! |
| 0            | T8/T9 | H06 | 0     | 0      | kleiner LLOQ | #VALUE! | 1    | #VALUE! |
| Blank no PEG | T8/T9 | H07 | 0     | 0      | kleiner LLOQ | #VALUE! | 2.75 | #VALUE! |
| Blank no PEG | T8/T9 | H08 | 0     | 0      | kleiner LLOQ | #VALUE! | 2.75 | #VALUE! |
| Blank no PEG | T8/T9 | H09 | 0     | 0      | kleiner LLOQ | #VALUE! | 2.75 | #VALUE! |
| Blank no PEG | T8/T9 | H10 | 0     | 0      | kleiner LLOQ | #VALUE! | 2.75 | #VALUE! |
| Blank no PEG | T8/T9 | H11 | 0     | 0      | kleiner LLOQ | #VALUE! | 2.75 | #VALUE! |
| Blank no PEG | T8/T9 | H12 | 0     | 0      | kleiner LLOQ | #VALUE! | 2.75 | #VALUE! |

|          |         |     |       |       |              |         |      |         |
|----------|---------|-----|-------|-------|--------------|---------|------|---------|
| 0        | T10/T11 | A01 | 0     | 0     | kleiner LLOQ | #VALUE! | 1    | #VALUE! |
| 0        | T10/T11 | A02 | 0     | 0     | kleiner LLOQ | #VALUE! | 1    | #VALUE! |
| 0        | T10/T11 | A03 | 0     | 0     | kleiner LLOQ | #VALUE! | 1    | #VALUE! |
| 0        | T10/T11 | A04 | 0     | 0     | kleiner LLOQ | #VALUE! | 1    | #VALUE! |
| T10KIN1  | T10/T11 | A05 | 0.598 | 0.547 | 0.547        | 0.024   | 2.75 | 0.067   |
| T10KIN1  | T10/T11 | A06 | 0.575 | 0.525 | 0.525        | 0.023   | 2.75 | 0.064   |
| T10KIN2  | T10/T11 | A07 | 0.524 | 0.473 | 0.473        | 0.021   | 2.75 | 0.057   |
| T10KIN2  | T10/T11 | A08 | 0.523 | 0.472 | 0.472        | 0.021   | 2.75 | 0.057   |
| T10KIN3  | T10/T11 | A09 | 0.235 | 0.184 | 0.184        | 0.007   | 2.75 | 0.020   |
| T10KIN3  | T10/T11 | A10 | 0.225 | 0.174 | 0.174        | 0.007   | 2.75 | 0.018   |
| T10KIN4  | T10/T11 | A11 | 0.117 | 0.066 | kleiner LLOQ | #VALUE! | 2.75 | #VALUE! |
| T10KIN4  | T10/T11 | A12 | 0.106 | 0.055 | kleiner LLOQ | #VALUE! | 2.75 | #VALUE! |
| 0        | T10/T11 | B01 | 0     | 0     | kleiner LLOQ | #VALUE! | 1    | #VALUE! |
| 0        | T10/T11 | B02 | 0     | 0     | kleiner LLOQ | #VALUE! | 1    | #VALUE! |
| 0        | T10/T11 | B03 | 0     | 0     | kleiner LLOQ | #VALUE! | 1    | #VALUE! |
| 0        | T10/T11 | B04 | 0     | 0     | kleiner LLOQ | #VALUE! | 1    | #VALUE! |
| T10KIS11 | T10/T11 | B05 | 0.115 | 0.064 | kleiner LLOQ | #VALUE! | 2.75 | #VALUE! |
| T10KIS11 | T10/T11 | B06 | 0.109 | 0.058 | kleiner LLOQ | #VALUE! | 2.75 | #VALUE! |
| T10KIS12 | T10/T11 | B07 | 0.177 | 0.126 | kleiner LLOQ | #VALUE! | 2.75 | #VALUE! |
| T10KIS12 | T10/T11 | B08 | 0.191 | 0.140 | kleiner LLOQ | #VALUE! | 2.75 | #VALUE! |
| T10KIS13 | T10/T11 | B09 | 0.110 | 0.059 | kleiner LLOQ | #VALUE! | 2.75 | #VALUE! |
| T10KIS13 | T10/T11 | B10 | 0.109 | 0.058 | kleiner LLOQ | #VALUE! | 2.75 | #VALUE! |
| T10KIS14 | T10/T11 | B11 | 0.098 | 0.047 | kleiner LLOQ | #VALUE! | 2.75 | #VALUE! |
| T10KIS14 | T10/T11 | B12 | 0.090 | 0.039 | kleiner LLOQ | #VALUE! | 2.75 | #VALUE! |
| 0        | T10/T11 | C01 | 0     | 0     | kleiner LLOQ | #VALUE! | 1    | #VALUE! |
| 0        | T10/T11 | C02 | 0     | 0     | kleiner LLOQ | #VALUE! | 1    | #VALUE! |
| 0        | T10/T11 | C03 | 0     | 0     | kleiner LLOQ | #VALUE! | 1    | #VALUE! |
| 0        | T10/T11 | C04 | 0     | 0     | kleiner LLOQ | #VALUE! | 1    | #VALUE! |
| T10KIS21 | T10/T11 | C05 | 0.149 | 0.098 | kleiner LLOQ | #VALUE! | 2.75 | #VALUE! |
| T10KIS21 | T10/T11 | C06 | 0.152 | 0.101 | kleiner LLOQ | #VALUE! | 2.75 | #VALUE! |
| T10KIS22 | T10/T11 | C07 | 0.190 | 0.139 | kleiner LLOQ | #VALUE! | 2.75 | #VALUE! |
| T10KIS22 | T10/T11 | C08 | 0.196 | 0.145 | kleiner LLOQ | #VALUE! | 2.75 | #VALUE! |
| T10KIS23 | T10/T11 | C09 | 0.211 | 0.160 | kleiner LLOQ | #VALUE! | 2.75 | #VALUE! |
| T10KIS23 | T10/T11 | C10 | 0.205 | 0.154 | kleiner LLOQ | #VALUE! | 2.75 | #VALUE! |
| T10KIS24 | T10/T11 | C11 | 0.070 | 0.019 | kleiner LLOQ | #VALUE! | 2.75 | #VALUE! |
| T10KIS24 | T10/T11 | C12 | 0.078 | 0.027 | kleiner LLOQ | #VALUE! | 2.75 | #VALUE! |
| 0        | T10/T11 | D01 | 0     | 0     | kleiner LLOQ | #VALUE! | 1    | #VALUE! |
| 0        | T10/T11 | D02 | 0     | 0     | kleiner LLOQ | #VALUE! | 1    | #VALUE! |
| 0        | T10/T11 | D03 | 0     | 0     | kleiner LLOQ | #VALUE! | 1    | #VALUE! |
| 0        | T10/T11 | D04 | 0     | 0     | kleiner LLOQ | #VALUE! | 1    | #VALUE! |
| T11KIN1  | T10/T11 | D05 | 0.648 | 0.597 | 0.597        | 0.027   | 2.75 | 0.074   |
| T11KIN1  | T10/T11 | D06 | 0.647 | 0.596 | 0.596        | 0.027   | 2.75 | 0.074   |
| T11KIN2  | T10/T11 | D07 | 0.729 | 0.678 | 0.678        | 0.031   | 2.75 | 0.084   |
| T11KIN2  | T10/T11 | D08 | 0.693 | 0.642 | 0.642        | 0.029   | 2.75 | 0.080   |
| T11KIN3  | T10/T11 | D09 | 0.275 | 0.224 | 0.224        | 0.009   | 2.75 | 0.025   |
| T11KIN3  | T10/T11 | D10 | 0.219 | 0.168 | kleiner LLOQ | #VALUE! | 2.75 | #VALUE! |
| T11KIN4  | T10/T11 | D11 | 0.151 | 0.100 | kleiner LLOQ | #VALUE! | 2.75 | #VALUE! |
| T11KIN4  | T10/T11 | D12 | 0.153 | 0.102 | kleiner LLOQ | #VALUE! | 2.75 | #VALUE! |

Plate: T10/T11

|   | 1 | 2 | 3 | 4 | 5     | 6     | 7     | 8     | 9     | 10    | 11    | 12    |
|---|---|---|---|---|-------|-------|-------|-------|-------|-------|-------|-------|
| A |   |   |   |   | 0.598 | 0.575 | 0.524 | 0.523 | 0.235 | 0.225 | 0.117 | 0.106 |
| B |   |   |   |   | 0.115 | 0.109 | 0.177 | 0.191 | 0.110 | 0.109 | 0.098 | 0.090 |
| C |   |   |   |   | 0.149 | 0.152 | 0.190 | 0.196 | 0.211 | 0.205 | 0.070 | 0.078 |
| D |   |   |   |   | 0.648 | 0.647 | 0.729 | 0.693 | 0.275 | 0.219 | 0.151 | 0.153 |
| E |   |   |   |   | 0.101 | 0.096 | 0.178 | 0.181 | 0.092 | 0.087 | 0.089 | 0.092 |
| F |   |   |   |   | 0.252 | 0.256 | 0.176 | 0.176 | 0.223 | 0.221 | 0.069 | 0.068 |
| G |   |   |   |   |       |       | 0.044 | 0.043 | 0.046 | 0.047 | 0.044 | 0.044 |
| H |   |   |   |   |       |       | 0.041 | 0.041 | 0.042 | 0.042 | 0.041 | 0.042 |

Plattenbelegung

|   | 1 | 2 | 3 | 4 | 5        | 6        | 7            | 8            | 9            | 10           | 11           | 12           |
|---|---|---|---|---|----------|----------|--------------|--------------|--------------|--------------|--------------|--------------|
| A |   |   |   |   | T10KIN1  | T10KIN1  | T10KIN2      | T10KIN2      | T10KIN3      | T10KIN3      | T10KIN4      | T10KIN4      |
| B |   |   |   |   | T10KIS11 | T10KIS11 | T10KIS12     | T10KIS12     | T10KIS13     | T10KIS13     | T10KIS14     | T10KIS14     |
| C |   |   |   |   | T10KIS21 | T10KIS21 | T10KIS22     | T10KIS22     | T10KIS23     | T10KIS23     | T10KIS24     | T10KIS24     |
| D |   |   |   |   | T11KIN1  | T11KIN1  | T11KIN2      | T11KIN2      | T11KIN3      | T11KIN3      | T11KIN4      | T11KIN4      |
| E |   |   |   |   | T11KIS11 | T11KIS11 | T11KIS12     | T11KIS12     | T11KIS13     | T11KIS13     | T11KIS14     | T11KIS14     |
| F |   |   |   |   | T11KIS21 | T11KIS21 | T11KIS22     | T11KIS22     | T11KIS23     | T11KIS23     | T11KIS24     | T11KIS24     |
| G |   |   |   |   |          |          | Blank PEG    | Blank PEG    | Blank PEG    | Blank PEG    | Blank PEG    | Blank PEG    |
| H |   |   |   |   |          |          | Blank no PEG | Blank no PEG | Blank no PEG | Blank no PEG | Blank no PEG | Blank no PEG |

Comment:

Date Operator

Date Control

|              |         |     |       |       |              |         |      |         |
|--------------|---------|-----|-------|-------|--------------|---------|------|---------|
| 0            | T10/T11 | E01 | 0     | 0     | kleiner LLOQ | #VALUE! | 1    | #VALUE! |
| 0            | T10/T11 | E02 | 0     | 0     | kleiner LLOQ | #VALUE! | 1    | #VALUE! |
| 0            | T10/T11 | E03 | 0     | 0     | kleiner LLOQ | #VALUE! | 1    | #VALUE! |
| 0            | T10/T11 | E04 | 0     | 0     | kleiner LLOQ | #VALUE! | 1    | #VALUE! |
| T11KIS11     | T10/T11 | E05 | 0.101 | 0.050 | kleiner LLOQ | #VALUE! | 2.75 | #VALUE! |
| T11KIS11     | T10/T11 | E06 | 0.096 | 0.045 | kleiner LLOQ | #VALUE! | 2.75 | #VALUE! |
| T11KIS12     | T10/T11 | E07 | 0.178 | 0.127 | kleiner LLOQ | #VALUE! | 2.75 | #VALUE! |
| T11KIS12     | T10/T11 | E08 | 0.181 | 0.131 | kleiner LLOQ | #VALUE! | 2.75 | #VALUE! |
| T11KIS13     | T10/T11 | E09 | 0.082 | 0.041 | kleiner LLOQ | #VALUE! | 2.75 | #VALUE! |
| T11KIS13     | T10/T11 | E10 | 0.087 | 0.036 | kleiner LLOQ | #VALUE! | 2.75 | #VALUE! |
| T11KIS14     | T10/T11 | E11 | 0.089 | 0.038 | kleiner LLOQ | #VALUE! | 2.75 | #VALUE! |
| T11KIS14     | T10/T11 | E12 | 0.092 | 0.041 | kleiner LLOQ | #VALUE! | 2.75 | #VALUE! |
| 0            | T10/T11 | F01 | 0     | 0     | kleiner LLOQ | #VALUE! | 1    | #VALUE! |
| 0            | T10/T11 | F02 | 0     | 0     | kleiner LLOQ | #VALUE! | 1    | #VALUE! |
| 0            | T10/T11 | F03 | 0     | 0     | kleiner LLOQ | #VALUE! | 1    | #VALUE! |
| 0            | T10/T11 | F04 | 0     | 0     | kleiner LLOQ | #VALUE! | 1    | #VALUE! |
| T11KIS21     | T10/T11 | F05 | 0.252 | 0.202 | 0.202        | 0.008   | 2.75 | 0.022   |
| T11KIS21     | T10/T11 | F06 | 0.256 | 0.205 | 0.205        | 0.008   | 2.75 | 0.022   |
| T11KIS22     | T10/T11 | F07 | 0.176 | 0.125 | kleiner LLOQ | #VALUE! | 2.75 | #VALUE! |
| T11KIS22     | T10/T11 | F08 | 0.176 | 0.126 | kleiner LLOQ | #VALUE! | 2.75 | #VALUE! |
| T11KIS23     | T10/T11 | F09 | 0.223 | 0.172 | 0.172        | 0.007   | 2.75 | 0.018   |
| T11KIS23     | T10/T11 | F10 | 0.221 | 0.170 | 0.170        | 0.006   | 2.75 | 0.018   |
| T11KIS24     | T10/T11 | F11 | 0.069 | 0.018 | kleiner LLOQ | #VALUE! | 2.75 | #VALUE! |
| T11KIS24     | T10/T11 | F12 | 0.068 | 0.017 | kleiner LLOQ | #VALUE! | 2.75 | #VALUE! |
| 0            | T10/T11 | G01 | 0     | 0     | kleiner LLOQ | #VALUE! | 1    | #VALUE! |
| 0            | T10/T11 | G02 | 0     | 0     | kleiner LLOQ | #VALUE! | 1    | #VALUE! |
| 0            | T10/T11 | G03 | 0     | 0     | kleiner LLOQ | #VALUE! | 1    | #VALUE! |
| 0            | T10/T11 | G04 | 0     | 0     | kleiner LLOQ | #VALUE! | 1    | #VALUE! |
| 0            | T10/T11 | G05 | 0     | 0     | kleiner LLOQ | #VALUE! | 1    | #VALUE! |
| 0            | T10/T11 | G06 | 0     | 0     | kleiner LLOQ | #VALUE! | 1    | #VALUE! |
| Blank PEG    | T10/T11 | G07 | 0     | 0     | kleiner LLOQ | #VALUE! | 2.75 | #VALUE! |
| Blank PEG    | T10/T11 | G08 | 0     | 0     | kleiner LLOQ | #VALUE! | 2.75 | #VALUE! |
| Blank PEG    | T10/T11 | G09 | 0     | 0     | kleiner LLOQ | #VALUE! | 2.75 | #VALUE! |
| Blank PEG    | T10/T11 | G10 | 0     | 0     | kleiner LLOQ | #VALUE! | 2.75 | #VALUE! |
| Blank PEG    | T10/T11 | G11 | 0     | 0     | kleiner LLOQ | #VALUE! | 2.75 | #VALUE! |
| Blank PEG    | T10/T11 | G12 | 0     | 0     | kleiner LLOQ | #VALUE! | 2.75 | #VALUE! |
| 0            | T10/T11 | H01 | 0     | 0     | kleiner LLOQ | #VALUE! | 1    | #VALUE! |
| 0            | T10/T11 | H02 | 0     | 0     | kleiner LLOQ | #VALUE! | 1    | #VALUE! |
| 0            | T10/T11 | H03 | 0     | 0     | kleiner LLOQ | #VALUE! | 1    | #VALUE! |
| 0            | T10/T11 | H04 | 0     | 0     | kleiner LLOQ | #VALUE! | 1    | #VALUE! |
| 0            | T10/T11 | H05 | 0     | 0     | kleiner LLOQ | #VALUE! | 1    | #VALUE! |
| 0            | T10/T11 | H06 | 0     | 0     | kleiner LLOQ | #VALUE! | 1    | #VALUE! |
| Blank no PEG | T10/T11 | H07 | 0     | 0     | kleiner LLOQ | #VALUE! | 2.75 | #VALUE! |
| Blank no PEG | T10/T11 | H08 | 0     | 0     | kleiner LLOQ | #VALUE! | 2.75 | #VALUE! |
| Blank no PEG | T10/T11 | H09 | 0     | 0     | kleiner LLOQ | #VALUE! | 2.75 | #VALUE! |
| Blank no PEG | T10/T11 | H10 | 0     | 0     | kleiner LLOQ | #VALUE! | 2.75 | #VALUE! |
| Blank no PEG | T10/T11 | H11 | 0     | 0     | kleiner LLOQ | #VALUE! | 2.75 | #VALUE! |
| Blank no PEG | T10/T11 | H12 | 0     | 0     | kleiner LLOQ | #VALUE! | 2.75 | #VALUE! |
| 0            | T12/T13 | A01 | 0     | 0     | kleiner LLOQ | #VALUE! | 1    | #VALUE! |
| 0            | T12/T13 | A02 | 0     | 0     | kleiner LLOQ | #VALUE! | 1    | #VALUE! |
| 0            | T12/T13 | A03 | 0     | 0     | kleiner LLOQ | #VALUE! | 1    | #VALUE! |
| 0            | T12/T13 | A04 | 0     | 0     | kleiner LLOQ | #VALUE! | 1    | #VALUE! |
| T12KIN1      | T12/T13 | A05 | 0.619 | 0.619 | 0.619        | 0.028   | 2.75 | 0.076   |
| T12KIN1      | T12/T13 | A06 | 0.663 | 0.612 | 0.612        | 0.027   | 2.75 | 0.076   |
| T12KIN2      | T12/T13 | A07 | 0.524 | 0.473 | 0.473        | 0.021   | 2.75 | 0.057   |
| T12KIN2      | T12/T13 | A08 | 0.538 | 0.487 | 0.487        | 0.022   | 2.75 | 0.059   |
| T12KIN3      | T12/T13 | A09 | 0.187 | 0.136 | kleiner LLOQ | #VALUE! | 2.75 | #VALUE! |
| T12KIN3      | T12/T13 | A10 | 0.184 | 0.133 | kleiner LLOQ | #VALUE! | 2.75 | #VALUE! |
| T12KIN4      | T12/T13 | A11 | 0.111 | 0.061 | kleiner LLOQ | #VALUE! | 2.75 | #VALUE! |
| T12KIN4      | T12/T13 | A12 | 0.107 | 0.056 | kleiner LLOQ | #VALUE! | 2.75 | #VALUE! |
| 0            | T12/T13 | B01 | 0     | 0     | kleiner LLOQ | #VALUE! | 1    | #VALUE! |
| 0            | T12/T13 | B02 | 0     | 0     | kleiner LLOQ | #VALUE! | 1    | #VALUE! |
| 0            | T12/T13 | B03 | 0     | 0     | kleiner LLOQ | #VALUE! | 1    | #VALUE! |
| 0            | T12/T13 | B04 | 0     | 0     | kleiner LLOQ | #VALUE! | 1    | #VALUE! |
| T12KIS11     | T12/T13 | B05 | 0.065 | 0.014 | kleiner LLOQ | #VALUE! | 2.75 | #VALUE! |
| T12KIS11     | T12/T13 | B06 | 0.066 | 0.015 | kleiner LLOQ | #VALUE! | 2.75 | #VALUE! |
| T12KIS12     | T12/T13 | B07 | 0.111 | 0.060 | kleiner LLOQ | #VALUE! | 2.75 | #VALUE! |
| T12KIS12     | T12/T13 | B08 | 0.113 | 0.062 | kleiner LLOQ | #VALUE! | 2.75 | #VALUE! |
| T12KIS13     | T12/T13 | B09 | 0.070 | 0.019 | kleiner LLOQ | #VALUE! | 2.75 | #VALUE! |
| T12KIS13     | T12/T13 | B10 | 0.069 | 0.018 | kleiner LLOQ | #VALUE! | 2.75 | #VALUE! |
| T12KIS14     | T12/T13 | B11 | 0.061 | 0.011 | kleiner LLOQ | #VALUE! | 2.75 | #VALUE! |
| T12KIS14     | T12/T13 | B12 | 0.062 | 0.011 | kleiner LLOQ | #VALUE! | 2.75 | #VALUE! |
| 0            | T12/T13 | C01 | 0     | 0     | kleiner LLOQ | #VALUE! | 1    | #VALUE! |
| 0            | T12/T13 | C02 | 0     | 0     | kleiner LLOQ | #VALUE! | 1    | #VALUE! |

Plate: T12/T13

|   | 1 | 2 | 3 | 4 | 5     | 6     | 7     | 8     | 9     | 10    | 11    | 12    |
|---|---|---|---|---|-------|-------|-------|-------|-------|-------|-------|-------|
| A |   |   |   |   | 0.670 | 0.663 | 0.524 | 0.538 | 0.187 | 0.184 | 0.111 | 0.107 |
| B |   |   |   |   | 0.065 | 0.066 | 0.111 | 0.113 | 0.070 | 0.069 | 0.061 | 0.062 |
| C |   |   |   |   | 0.180 | 0.181 | 0.102 | 0.104 | 0.171 | 0.172 | 0.061 | 0.062 |
| D |   |   |   |   | 0.678 | 0.577 | 0.479 | 0.502 | 0.148 | 0.165 | 0.137 | 0.129 |
| E |   |   |   |   | 0.067 | 0.068 | 0.095 | 0.107 | 0.064 | 0.065 | 0.090 | 0.099 |
| F |   |   |   |   | 0.255 | 0.263 | 0.081 | 0.085 | 0.255 | 0.249 | 0.077 | 0.075 |
| G |   |   |   |   |       |       | 0.044 | 0.042 | 0.043 | 0.042 | 0.045 | 0.042 |
| H |   |   |   |   |       |       | 0.041 | 0.040 | 0.041 | 0.042 | 0.042 | 0.042 |

Plattenbelegung

|   | 1 | 2 | 3 | 4 | 5        | 6        | 7        | 8        | 9        | 10       | 11       | 12       |
|---|---|---|---|---|----------|----------|----------|----------|----------|----------|----------|----------|
| A |   |   |   |   | T12KIN1  | T12KIN1  | T12KIN2  | T12KIN2  | T12KIN3  | T12KIN3  | T12KIN4  | T12KIN4  |
| B |   |   |   |   | T12KIS11 | T12KIS11 | T12KIS12 | T12KIS12 | T12KIS13 | T12KIS13 | T12KIS14 | T12KIS14 |
| C |   |   |   |   | T12KIS21 | T12KIS21 | T12KIS22 | T12KIS22 | T12KIS23 | T12KIS23 | T12KIS24 | T12KIS24 |
| D |   |   |   |   | T13KIN1  | T13KIN1  | T13KIN2  | T13KIN2  | T13KIN3  | T13KIN3  | T13KIN4  | T13KIN4  |
| E |   |   |   |   | T13KIS11 | T13KIS11 | T13KIS12 | T13KIS12 | T13KIS13 | T13KIS13 | T13KIS14 | T13KIS14 |
| F |   |   |   |   | T13KIS21 | T13KIS21 | T13KIS22 | T13KIS22 | T13KIS23 | T13KIS23 | T13KIS24 | T13KIS24 |



|           |     |     |       |         |              |         |      |         |
|-----------|-----|-----|-------|---------|--------------|---------|------|---------|
| T14KIN2   | T14 | A07 | 0.619 | 0.568   | 0.568        | 0.025   | 2.75 | 0.070   |
| T14KIN2   | T14 | A08 | 0.625 | 0.574   | 0.574        | 0.026   | 2.75 | 0.071   |
| T14KIN3   | T14 | A09 | 0.122 | 0.071   | kleiner LLOQ | #VALUE! | 2.75 | #VALUE! |
| T14KIN3   | T14 | A10 | 0.123 | 0.072   | kleiner LLOQ | #VALUE! | 2.75 | #VALUE! |
| T14KIN4   | T14 | A11 | 0.140 | 0.089   | kleiner LLOQ | #VALUE! | 2.75 | #VALUE! |
| T14KIN4   | T14 | A12 | 0.139 | 0.088   | kleiner LLOQ | #VALUE! | 2.75 | #VALUE! |
| 0         | T14 | B01 | 0     | 0       | kleiner LLOQ | #VALUE! | 1    | #VALUE! |
| 0         | T14 | B02 | 0     | 0       | kleiner LLOQ | #VALUE! | 1    | #VALUE! |
| 0         | T14 | B03 | 0     | 0       | kleiner LLOQ | #VALUE! | 1    | #VALUE! |
| 0         | T14 | B04 | 0     | 0       | kleiner LLOQ | #VALUE! | 1    | #VALUE! |
| T14KIS11  | T14 | B05 | 0.064 | 0.013   | kleiner LLOQ | #VALUE! | 2.75 | #VALUE! |
| T14KIS11  | T14 | B06 | 0.066 | 0.015   | kleiner LLOQ | #VALUE! | 2.75 | #VALUE! |
| T14KIS12  | T14 | B07 | 0.066 | 0.015   | kleiner LLOQ | #VALUE! | 2.75 | #VALUE! |
| T14KIS12  | T14 | B08 | 0.067 | 0.016   | kleiner LLOQ | #VALUE! | 2.75 | #VALUE! |
| T14KIS13  | T14 | B09 | 0.096 | 0.046   | kleiner LLOQ | #VALUE! | 2.75 | #VALUE! |
| T14KIS13  | T14 | B10 | 0.100 | 0.049   | kleiner LLOQ | #VALUE! | 2.75 | #VALUE! |
| T14KIS14  | T14 | B11 | 0.099 | 0.048   | kleiner LLOQ | #VALUE! | 2.75 | #VALUE! |
| T14KIS14  | T14 | B12 | 0.098 | 0.047   | kleiner LLOQ | #VALUE! | 2.75 | #VALUE! |
| 0         | T14 | C01 | 0     | 0       | kleiner LLOQ | #VALUE! | 1    | #VALUE! |
| 0         | T14 | C02 | 0     | 0       | kleiner LLOQ | #VALUE! | 1    | #VALUE! |
| 0         | T14 | C03 | 0     | 0       | kleiner LLOQ | #VALUE! | 1    | #VALUE! |
| 0         | T14 | C04 | 0     | 0       | kleiner LLOQ | #VALUE! | 1    | #VALUE! |
| T14KIS21  | T14 | C05 | 0.062 | 0.011   | kleiner LLOQ | #VALUE! | 2.75 | #VALUE! |
| T14KIS21  | T14 | C06 | 0.063 | 0.012   | kleiner LLOQ | #VALUE! | 2.75 | #VALUE! |
| T14KIS22  | T14 | C07 | 0.074 | 0.023   | kleiner LLOQ | #VALUE! | 2.75 | #VALUE! |
| T14KIS22  | T14 | C08 | 0.076 | 0.025   | kleiner LLOQ | #VALUE! | 2.75 | #VALUE! |
| T14KIS23  | T14 | C09 | 0.240 | 0.190   | 0.190        | 0.007   | 2.75 | 0.020   |
| T14KIS23  | T14 | C10 | 0.247 | 0.196   | 0.196        | 0.008   | 2.75 | 0.021   |
| T14KIS24  | T14 | C11 | 0.093 | 0.042   | kleiner LLOQ | #VALUE! | 2.75 | #VALUE! |
| T14KIS24  | T14 | C12 | 0.090 | 0.039   | kleiner LLOQ | #VALUE! | 2.75 | #VALUE! |
| 0         | T14 | D01 | 0     | 0       | kleiner LLOQ | #VALUE! | 1    | #VALUE! |
| 0         | T14 | D02 | 0     | 0       | kleiner LLOQ | #VALUE! | 1    | #VALUE! |
| 0         | T14 | D03 | 0     | 0       | kleiner LLOQ | #VALUE! | 1    | #VALUE! |
| 0         | T14 | D04 | 0     | 0       | kleiner LLOQ | #VALUE! | 1    | #VALUE! |
| 0         | T14 | D05 | 0     | 0       | kleiner LLOQ | #VALUE! | 1    | #VALUE! |
| 0         | T14 | D06 | 0     | 0       | kleiner LLOQ | #VALUE! | 1    | #VALUE! |
| 0         | T14 | D07 | 0     | 0       | kleiner LLOQ | #VALUE! | 1    | #VALUE! |
| 0         | T14 | D08 | 0     | 0       | kleiner LLOQ | #VALUE! | 1    | #VALUE! |
| 0         | T14 | D09 | 0     | 0       | kleiner LLOQ | #VALUE! | 1    | #VALUE! |
| 0         | T14 | D10 | 0     | 0       | kleiner LLOQ | #VALUE! | 1    | #VALUE! |
| 0         | T14 | D11 | 0     | 0       | kleiner LLOQ | #VALUE! | 1    | #VALUE! |
| 0         | T14 | D12 | 0     | #VALUE! | #VALUE!      | #VALUE! | 1    | #VALUE! |
| 0         | T14 | E01 | 0     | 0       | kleiner LLOQ | #VALUE! | 1    | #VALUE! |
| 0         | T14 | E02 | 0     | 0       | kleiner LLOQ | #VALUE! | 1    | #VALUE! |
| 0         | T14 | E03 | 0     | 0       | kleiner LLOQ | #VALUE! | 1    | #VALUE! |
| 0         | T14 | E04 | 0     | 0       | kleiner LLOQ | #VALUE! | 1    | #VALUE! |
| 0         | T14 | E05 | 0     | 0       | kleiner LLOQ | #VALUE! | 1    | #VALUE! |
| 0         | T14 | E06 | 0     | 0       | kleiner LLOQ | #VALUE! | 1    | #VALUE! |
| 0         | T14 | E07 | 0     | 0       | kleiner LLOQ | #VALUE! | 1    | #VALUE! |
| 0         | T14 | E08 | 0     | 0       | kleiner LLOQ | #VALUE! | 1    | #VALUE! |
| 0         | T14 | E09 | 0     | 0       | kleiner LLOQ | #VALUE! | 1    | #VALUE! |
| 0         | T14 | E10 | 0     | 0       | kleiner LLOQ | #VALUE! | 1    | #VALUE! |
| 0         | T14 | E11 | 0     | 0       | kleiner LLOQ | #VALUE! | 1    | #VALUE! |
| 0         | T14 | E12 | 0     | #VALUE! | #VALUE!      | #VALUE! | 1    | #VALUE! |
| 0         | T14 | F01 | 0     | 0       | kleiner LLOQ | #VALUE! | 1    | #VALUE! |
| 0         | T14 | F02 | 0     | 0       | kleiner LLOQ | #VALUE! | 1    | #VALUE! |
| 0         | T14 | F03 | 0     | 0       | kleiner LLOQ | #VALUE! | 1    | #VALUE! |
| 0         | T14 | F04 | 0     | 0       | kleiner LLOQ | #VALUE! | 1    | #VALUE! |
| 0         | T14 | F05 | 0     | 0       | kleiner LLOQ | #VALUE! | 1    | #VALUE! |
| 0         | T14 | F06 | 0     | 0       | kleiner LLOQ | #VALUE! | 1    | #VALUE! |
| 0         | T14 | F07 | 0     | 0       | kleiner LLOQ | #VALUE! | 1    | #VALUE! |
| 0         | T14 | F08 | 0     | 0       | kleiner LLOQ | #VALUE! | 1    | #VALUE! |
| 0         | T14 | F09 | 0     | 0       | kleiner LLOQ | #VALUE! | 1    | #VALUE! |
| 0         | T14 | F10 | 0     | 0       | kleiner LLOQ | #VALUE! | 1    | #VALUE! |
| 0         | T14 | F11 | 0     | 0       | kleiner LLOQ | #VALUE! | 1    | #VALUE! |
| 0         | T14 | F12 | 0     | #VALUE! | #VALUE!      | #VALUE! | 1    | #VALUE! |
| 0         | T14 | G01 | 0     | 0       | kleiner LLOQ | #VALUE! | 1    | #VALUE! |
| 0         | T14 | G02 | 0     | 0       | kleiner LLOQ | #VALUE! | 1    | #VALUE! |
| 0         | T14 | G03 | 0     | 0       | kleiner LLOQ | #VALUE! | 1    | #VALUE! |
| 0         | T14 | G04 | 0     | 0       | kleiner LLOQ | #VALUE! | 1    | #VALUE! |
| 0         | T14 | G05 | 0     | 0       | kleiner LLOQ | #VALUE! | 1    | #VALUE! |
| 0         | T14 | G06 | 0     | 0       | kleiner LLOQ | #VALUE! | 1    | #VALUE! |
| Blank PEG | T14 | G07 | 0     | 0       | kleiner LLOQ | #VALUE! | 1    | #VALUE! |
| Blank PEG | T14 | G08 | 0     | 0       | kleiner LLOQ | #VALUE! | 1    | #VALUE! |
| Blank PEG | T14 | G09 | 0     | 0       | kleiner LLOQ | #VALUE! | 1    | #VALUE! |

|   |   |   |   |   |       |       |       |       |       |       |       |       |
|---|---|---|---|---|-------|-------|-------|-------|-------|-------|-------|-------|
|   | 1 | 2 | 3 | 4 | 5     | 6     | 7     | 8     | 9     | 10    | 11    | 12    |
| A |   |   |   |   | 0.736 | 0.721 | 0.619 | 0.625 | 0.122 | 0.123 | 0.140 | 0.139 |
| B |   |   |   |   | 0.064 | 0.066 | 0.066 | 0.067 | 0.096 | 0.100 | 0.099 | 0.098 |
| C |   |   |   |   | 0.062 | 0.063 | 0.074 | 0.076 | 0.240 | 0.247 | 0.093 | 0.090 |
| D |   |   |   |   |       |       |       |       |       |       |       |       |
| E |   |   |   |   |       |       |       |       |       |       |       |       |
| F |   |   |   |   |       |       |       |       |       |       |       |       |
| G |   |   |   |   |       |       | 0.044 | 0.043 | 0.044 | 0.048 | 0.046 | 0.043 |
| H |   |   |   |   |       |       | 0.042 | 0.044 | 0.041 | 0.042 | 0.045 | 0.044 |

Plattenbelegung

|   |   |   |   |   |          |          |              |              |              |              |              |              |
|---|---|---|---|---|----------|----------|--------------|--------------|--------------|--------------|--------------|--------------|
|   | 1 | 2 | 3 | 4 | 5        | 6        | 7            | 8            | 9            | 10           | 11           | 12           |
| A |   |   |   |   | T14KIN1  | T14KIN1  | T14KIN2      | T14KIN2      | T14KIN3      | T14KIN3      | T14KIN4      | T14KIN4      |
| B |   |   |   |   | T14KIS11 | T14KIS11 | T14KIS12     | T14KIS12     | T14KIS13     | T14KIS13     | T14KIS14     | T14KIS14     |
| C |   |   |   |   | T14KIS21 | T14KIS21 | T14KIS22     | T14KIS22     | T14KIS23     | T14KIS23     | T14KIS24     | T14KIS24     |
| D |   |   |   |   |          |          |              |              |              |              |              |              |
| E |   |   |   |   |          |          |              |              |              |              |              |              |
| F |   |   |   |   |          |          |              |              |              |              |              |              |
| G |   |   |   |   |          |          | Blank PEG    | Blank PEG    | Blank PEG    | Blank PEG    | Blank PEG    | Blank PEG    |
| H |   |   |   |   |          |          | Blank no PEG | Blank no PEG | Blank no PEG | Blank no PEG | Blank no PEG | Blank no PEG |

Comment:

Date \_\_\_\_\_ Operator \_\_\_\_\_ Date \_\_\_\_\_ Control \_\_\_\_\_



|              |     |     |   |   |              |         |   |         |
|--------------|-----|-----|---|---|--------------|---------|---|---------|
| Blank PEG    | T14 | G10 | 0 | 0 | kleiner LLOQ | #VALUE! | 1 | #VALUE! |
| Blank PEG    | T14 | G11 | 0 | 0 | kleiner LLOQ | #VALUE! | 1 | #VALUE! |
| Blank PEG    | T14 | G12 | 0 | 0 | kleiner LLOQ | #VALUE! | 1 | #VALUE! |
| 0            | T14 | H01 | 0 | 0 | kleiner LLOQ | #VALUE! | 1 | #VALUE! |
| 0            | T14 | H02 | 0 | 0 | kleiner LLOQ | #VALUE! | 1 | #VALUE! |
| 0            | T14 | H03 | 0 | 0 | kleiner LLOQ | #VALUE! | 1 | #VALUE! |
| 0            | T14 | H04 | 0 | 0 | kleiner LLOQ | #VALUE! | 1 | #VALUE! |
| 0            | T14 | H05 | 0 | 0 | kleiner LLOQ | #VALUE! | 1 | #VALUE! |
| 0            | T14 | H06 | 0 | 0 | kleiner LLOQ | #VALUE! | 1 | #VALUE! |
| Blank no PEG | T14 | H07 | 0 | 0 | kleiner LLOQ | #VALUE! | 1 | #VALUE! |
| Blank no PEG | T14 | H08 | 0 | 0 | kleiner LLOQ | #VALUE! | 1 | #VALUE! |
| Blank no PEG | T14 | H09 | 0 | 0 | kleiner LLOQ | #VALUE! | 1 | #VALUE! |
| Blank no PEG | T14 | H10 | 0 | 0 | kleiner LLOQ | #VALUE! | 1 | #VALUE! |
| Blank no PEG | T14 | H11 | 0 | 0 | kleiner LLOQ | #VALUE! | 1 | #VALUE! |
| Blank no PEG | T14 | H12 | 0 | 0 | kleiner LLOQ | #VALUE! | 1 | #VALUE! |

|                    |              |                            |                         |                         |                              |
|--------------------|--------------|----------------------------|-------------------------|-------------------------|------------------------------|
| Project number     | F-120        | Apparatus                  | Wallac Victor           | Operator                | IsBa                         |
| GLP Study (Number) | n.a.         | Protocol (Instrument meth) | LDH test 2016           | Date of preparation     | 19-04-18                     |
| hot substance      | isotope      | n.a.                       | File name (results)     | IsBa_180419/20_LDH_full | Date of measurement          |
|                    | name         | n.a.                       | Kind of well plate      | 96 well                 | shaking time [min]           |
| cold substance     | ACB-ID       | n.a.                       | sample volume [µL]      | 100                     | stirring rate (Target) [rpm] |
|                    | Batch number | n.a.                       | Cocktail volume [µL]    | 175                     | Kind of measurement          |
| n.a.               | name         | LDH                        | ACB-ID of cocktail      |                         | Wave length [nm]             |
|                    | ACB-ID       | L23982R                    | Matrix                  | DMEM (from powder)+PE   | Remarks                      |
| n.a.               | Batch number | SLBK6345V                  | Blank description       | DMEM/PEG, H2O           | Remarks                      |
|                    |              |                            | Pipettes (No. / volume) | 50-200µl                | Remarks                      |
| n.a.               | n.a.         | Pipettes (No. / volume)    | n.a.                    | Remarks                 | n.a.                         |

Messdaten (diese Tabelle in Bericht übernehmen)

| Sample name * | concentration (theor.) * | measured data | measured data | measured data | mean measured | SD   | RSD  | Blank * | measured data after * | concentration (calc.) * | Deviation * | Residuen |
|---------------|--------------------------|---------------|---------------|---------------|---------------|------|------|---------|-----------------------|-------------------------|-------------|----------|
|               | [µg/mL]                  | [AU]          | [AU]          | [AU]          | [AU]          | [AU] | [%]  | [AU]    | Blank subtraction     | [µg/mL]                 | [%]         |          |
| KLP1          | 0.148                    | 1.579         | 1.652         | 1.627         | 1.62          | 0.03 | 1.87 | 0.047   | 1.568                 | 0.148                   | -0.24       | 0.00     |
| KLP2          | 0.114                    | 1.357         | 1.443         | 1.372         | 1.39          | 0.04 | 2.70 | 0.054   | 1.340                 | 0.110                   | -3.40       | 0.00     |
| KLP3          | 0.074                    | 1.272         | 1.193         | 1.228         | 1.23          | 0.03 | 2.63 | 0.051   | 1.180                 | 0.084                   | 13.04       | 0.01     |
| KLP4          | 0.041                    | 0.959         | 0.972         | 0.883         | 0.94          | 0.04 | 4.19 | 0.051   | 0.887                 | 0.035                   | -13.32      | -0.01    |
| KLP5          |                          |               |               |               |               |      |      | 0.052   |                       |                         |             |          |
| KLP6          |                          |               |               |               |               |      |      | 0.051   |                       |                         |             |          |
| KLP7          |                          |               |               |               |               |      |      |         |                       |                         |             |          |
| KLP8          |                          |               |               |               |               |      |      |         |                       |                         |             |          |

Statistical data

|                                              |                                          |                     |             |
|----------------------------------------------|------------------------------------------|---------------------|-------------|
| Geradensteigung                              | Slope                                    | m                   | 6.05        |
| Y-Achsenabschnitt                            | Y-intercept                              | b                   | 0.67        |
| Standardabw. Geradensteigung                 | SD-Slope                                 | S <sub>m</sub>      | 0.620291227 |
| Standardabw. Achsenabschnittes               | SD-Y-Intercept                           | S <sub>b</sub>      | 0.063894294 |
| Anzahl Messpunkte                            | number of measuring points               | n                   | 4           |
| Quadratsumme                                 | sum of squares                           | Q <sub>xx</sub>     | 0.006578604 |
| Bereichsmittle                               |                                          | f                   | 0.094336926 |
| Freiheitsgrade                               | degree of freedom                        | f                   | 2           |
| Student-t-Faktor für (P = 95 %; f = n-2)     | Student-t-factor for (P = 95 %; f = n-2) | t                   | 4.303       |
| Vertrauensbereich Steig. (95 %) Obergrenze   |                                          | m + VB <sub>m</sub> | 8.722319627 |
| Vertrauensbereich Steig. (95 %) Untergrenze  |                                          | m - VB <sub>m</sub> | 3.384093228 |
| Vertrauensbereich Achsenabschnitt (95 %) Og. |                                          | b + VB <sub>b</sub> | 0.946914615 |
| Vertrauensbereich Achsenabschnitt (95 %) Ug. |                                          | b - VB <sub>b</sub> | 0.398761518 |
| Korrelationskoeffizient                      | correlation coefficient                  | r                   | 0.9897      |
| Bestimmtheitsmaß                             | determination coefficient                | r <sup>2</sup>      | 0.9794      |
| Reststandardabweichung                       |                                          | S <sub>0</sub>      | 0.050310948 |
| Summe Restquadrat                            |                                          | sd                  | 2.895683345 |
| Verfahrensstandardabw.                       |                                          | S <sub>0p</sub>     | 0.008311454 |
| Rel. Verfahrensstandardabw. %                |                                          | V <sub>0p</sub>     | 8.810393374 |

|                          |       |
|--------------------------|-------|
| mean Blank               | 0     |
| SD Blank                 | 0.00  |
| RSD Blank                | 3.79  |
| x <sup>2</sup> SD (LLOQ) | 0     |
| x <sup>2</sup> SD (LOD)  | 0     |
| LLOQ (AU)                | 0     |
| LOD (AU)                 | 0     |
| LLOQ                     | 1.568 |
| LLOQ (Lin)               | 0.887 |

Evaluation / Comment

LDH linearity valid with 7 standards, split in lin high and lin low, each with 4 standards and KLP4 common standard for both. R<sup>2</sup> 0,9981, deviations for both between -13.34% and +13.04%

Date \_\_\_\_\_ Operator \_\_\_\_\_ Date \_\_\_\_\_ Control \_\_\_\_\_

|               |  |         |               |
|---------------|--|---------|---------------|
| Formblatt-Nr. |  | Version |               |
| Titel         |  |         |               |
| Gültig ab     |  | Ablage  | Projektordner |

Figure 1 Linearity

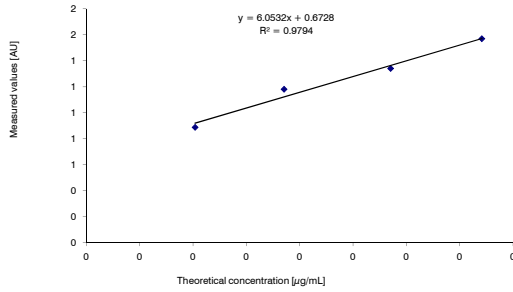

Figure 2 Method validation Residuen Plot

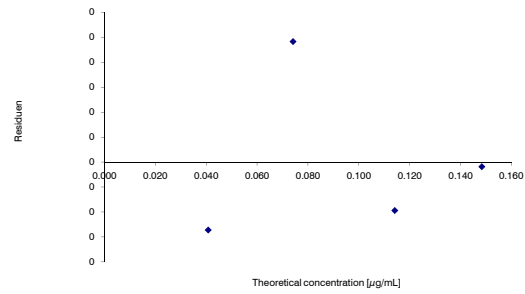

Evaluation / Comment

lin passed

Date

Operator

Date

Control

| Sample name | Plate | Position | [AU]  | [AU]-Blank | Rating       | [µg/mL] | Dilution factor | [µg/mL] |
|-------------|-------|----------|-------|------------|--------------|---------|-----------------|---------|
| 0           | T8/T9 | A01      | 0     | 0          | kleiner LLOQ | #VALUE! | 1               | #VALUE! |
| 0           | T8/T9 | A02      | 0     | 0          | kleiner LLOQ | #VALUE! | 1               | #VALUE! |
| 0           | T8/T9 | A03      | 0     | 0          | kleiner LLOQ | #VALUE! | 1               | #VALUE! |
| 0           | T8/T9 | A04      | 0     | 0          | kleiner LLOQ | #VALUE! | 1               | #VALUE! |
| T8KIN1      | T8/T9 | A05      | 0.000 | -0.051     | kleiner LLOQ | #VALUE! |                 |         |
| T8KIN1      | T8/T9 | A06      | 0.000 | -0.051     | kleiner LLOQ | #VALUE! |                 |         |
| T8KIN2      | T8/T9 | A07      | 0     | 0          | kleiner LLOQ | #VALUE! |                 |         |
| T8KIN2      | T8/T9 | A08      | 0     | 0          | kleiner LLOQ | #VALUE! |                 |         |
| T8KIN3      | T8/T9 | A09      | 0.000 | -0.051     | kleiner LLOQ | #VALUE! |                 |         |
| T8KIN3      | T8/T9 | A10      | 0.000 | -0.051     | kleiner LLOQ | #VALUE! |                 |         |
| T8KIN4      | T8/T9 | A11      | 0     | 0          | kleiner LLOQ | #VALUE! |                 |         |
| T8KIN4      | T8/T9 | A12      | 0     | 0          | kleiner LLOQ | #VALUE! |                 |         |
| 0           | T8/T9 | B01      | 0     | 0          | kleiner LLOQ | #VALUE! |                 |         |
| 0           | T8/T9 | B02      | 0     | 0          | kleiner LLOQ | #VALUE! |                 |         |
| 0           | T8/T9 | B03      | 0     | 0          | kleiner LLOQ | #VALUE! |                 |         |
| 0           | T8/T9 | B04      | 0     | 0          | kleiner LLOQ | #VALUE! |                 |         |
| T8KIS11     | T8/T9 | B05      | 0     | 0          | kleiner LLOQ | #VALUE! |                 |         |
| T8KIS11     | T8/T9 | B06      | 0.000 | -0.051     | kleiner LLOQ | #VALUE! |                 |         |
| T8KIS12     | T8/T9 | B07      | 0.000 | -0.051     | kleiner LLOQ | #VALUE! |                 |         |
| T8KIS12     | T8/T9 | B08      | 0.000 | -0.051     | kleiner LLOQ | #VALUE! |                 |         |
| T8KIS13     | T8/T9 | B09      | 0     | 0          | kleiner LLOQ | #VALUE! |                 |         |
| T8KIS13     | T8/T9 | B10      | 0     | 0          | kleiner LLOQ | #VALUE! |                 |         |
| T8KIS14     | T8/T9 | B11      | 0     | 0          | kleiner LLOQ | #VALUE! |                 |         |
| T8KIS14     | T8/T9 | B12      | 0     | 0          | kleiner LLOQ | #VALUE! |                 |         |
| 0           | T8/T9 | C01      | 0     | 0          | kleiner LLOQ | #VALUE! |                 |         |
| 0           | T8/T9 | C02      | 0     | 0          | kleiner LLOQ | #VALUE! |                 |         |
| 0           | T8/T9 | C03      | 0     | 0          | kleiner LLOQ | #VALUE! |                 |         |
| 0           | T8/T9 | C04      | 0     | 0          | kleiner LLOQ | #VALUE! |                 |         |
| T8KIS21     | T8/T9 | C05      | 0.000 | -0.051     | kleiner LLOQ | #VALUE! |                 |         |
| T8KIS21     | T8/T9 | C06      | 0.000 | -0.051     | kleiner LLOQ | #VALUE! |                 |         |
| T8KIS22     | T8/T9 | C07      | 0.000 | -0.051     | kleiner LLOQ | #VALUE! |                 |         |
| T8KIS22     | T8/T9 | C08      | 0.000 | -0.051     | kleiner LLOQ | #VALUE! |                 |         |
| T8KIS23     | T8/T9 | C09      | 0.000 | -0.051     | kleiner LLOQ | #VALUE! |                 |         |
| T8KIS23     | T8/T9 | C10      | 0.000 | -0.051     | kleiner LLOQ | #VALUE! |                 |         |
| T8KIS24     | T8/T9 | C11      | 0     | 0          | kleiner LLOQ | #VALUE! | 1               | #VALUE! |
| T8KIS24     | T8/T9 | C12      | 0     | 0          | kleiner LLOQ | #VALUE! | 1               | #VALUE! |
| 0           | T8/T9 | D01      | 0     | 0          | kleiner LLOQ | #VALUE! | 1               | #VALUE! |
| 0           | T8/T9 | D02      | 0     | 0          | kleiner LLOQ | #VALUE! | 1               | #VALUE! |
| 0           | T8/T9 | D03      | 0     | 0          | kleiner LLOQ | #VALUE! | 1               | #VALUE! |
| 0           | T8/T9 | D04      | 0     | 0          | kleiner LLOQ | #VALUE! | 1               | #VALUE! |
| T9KIN1      | T8/T9 | D05      | 0     | 0          | kleiner LLOQ | #VALUE! | 1               | #VALUE! |
| T9KIN1      | T8/T9 | D06      | 0     | 0          | kleiner LLOQ | #VALUE! | 1               | #VALUE! |
| T9KIN2      | T8/T9 | D07      | 0     | 0          | kleiner LLOQ | #VALUE! | 1               | #VALUE! |
| T9KIN2      | T8/T9 | D08      | 0     | 0          | kleiner LLOQ | #VALUE! | 1               | #VALUE! |
| T9KIN3      | T8/T9 | D09      | 0     | 0          | kleiner LLOQ | #VALUE! | 1               | #VALUE! |
| T9KIN3      | T8/T9 | D10      | 0     | 0          | kleiner LLOQ | #VALUE! | 1               | #VALUE! |
| T9KIN4      | T8/T9 | D11      | 0     | 0          | kleiner LLOQ | #VALUE! | 1               | #VALUE! |
| T9KIN4      | T8/T9 | D12      | 0     | 0          | kleiner LLOQ | #VALUE! | 1               | #VALUE! |

Plate: T8/T9

|   |   |   |   |   |   |   |   |   |   |    |    |    |
|---|---|---|---|---|---|---|---|---|---|----|----|----|
|   | 1 | 2 | 3 | 4 | 5 | 6 | 7 | 8 | 9 | 10 | 11 | 12 |
| A |   |   |   |   |   |   |   |   |   |    |    |    |
| B |   |   |   |   |   |   |   |   |   |    |    |    |
| C |   |   |   |   |   |   |   |   |   |    |    |    |
| D |   |   |   |   |   |   |   |   |   |    |    |    |
| E |   |   |   |   |   |   |   |   |   |    |    |    |
| F |   |   |   |   |   |   |   |   |   |    |    |    |
| G |   |   |   |   |   |   |   |   |   |    |    |    |
| H |   |   |   |   |   |   |   |   |   |    |    |    |

Plattenbelegung

|   |   |   |   |   |         |         |              |              |              |              |              |              |
|---|---|---|---|---|---------|---------|--------------|--------------|--------------|--------------|--------------|--------------|
|   | 1 | 2 | 3 | 4 | 5       | 6       | 7            | 8            | 9            | 10           | 11           | 12           |
| A |   |   |   |   |         |         |              |              |              |              |              |              |
| B |   |   |   |   | T8KIN1  | T8KIN1  | T8KIN2       | T8KIN2       | T8KIN3       | T8KIN3       | T8KIN4       | T8KIN4       |
| C |   |   |   |   | T8KIS21 | T8KIS21 | T8KIS22      | T8KIS22      | T8KIS23      | T8KIS23      | T8KIS24      | T8KIS24      |
| D |   |   |   |   | T9KIN1  | T9KIN1  | T9KIN2       | T9KIN2       | T9KIN3       | T9KIN3       | T9KIN4       | T9KIN4       |
| E |   |   |   |   | T9KIS11 | T9KIS11 | T9KIS12      | T9KIS12      | T9KIS13      | T9KIS13      | T9KIS14      | T9KIS14      |
| F |   |   |   |   | T9KIS21 | T9KIS21 | T9KIS22      | T9KIS22      | T9KIS23      | T9KIS23      | T9KIS24      | T9KIS24      |
| G |   |   |   |   |         |         | Blank PEG    | Blank PEG    | Blank PEG    | Blank PEG    | Blank PEG    | Blank PEG    |
| H |   |   |   |   |         |         | Blank no PEG | Blank no PEG | Blank no PEG | Blank no PEG | Blank no PEG | Blank no PEG |

Comment:  
alle Messwerte bei lin low

Samples aufgeteilt in lin high und low;niedriger konzentrierte Samples bei lin low zu finden.

Date Operator Date Control

|              |       |     |       |        |              |         |      |         |
|--------------|-------|-----|-------|--------|--------------|---------|------|---------|
| 0            | T8/T9 | E01 | 0     | 0      | kleiner LLOQ | #VALUE! | 1    | #VALUE! |
| 0            | T8/T9 | E02 | 0     | 0      | kleiner LLOQ | #VALUE! | 1    | #VALUE! |
| 0            | T8/T9 | E03 | 0     | 0      | kleiner LLOQ | #VALUE! | 1    | #VALUE! |
| 0            | T8/T9 | E04 | 0     | 0      | kleiner LLOQ | #VALUE! | 1    | #VALUE! |
| T9KIS11      | T8/T9 | E05 | 0     | 0      | kleiner LLOQ | #VALUE! | 1    | #VALUE! |
| T9KIS11      | T8/T9 | E06 | 0     | 0      | kleiner LLOQ | #VALUE! | 1    | #VALUE! |
| T9KIS12      | T8/T9 | E07 | 0     | 0      | kleiner LLOQ | #VALUE! | 1    | #VALUE! |
| T9KIS12      | T8/T9 | E08 | 0     | 0      | kleiner LLOQ | #VALUE! | 1    | #VALUE! |
| T9KIS13      | T8/T9 | E09 | 0     | 0      | kleiner LLOQ | #VALUE! | 1    | #VALUE! |
| T9KIS13      | T8/T9 | E10 | 0     | 0      | kleiner LLOQ | #VALUE! | 1    | #VALUE! |
| T9KIS14      | T8/T9 | E11 | 0     | 0      | kleiner LLOQ | #VALUE! | 1    | #VALUE! |
| T9KIS14      | T8/T9 | E12 | 0     | 0      | kleiner LLOQ | #VALUE! | 1    | #VALUE! |
| 0            | T8/T9 | F01 | 0     | 0      | kleiner LLOQ | #VALUE! | 1    | #VALUE! |
| 0            | T8/T9 | F02 | 0     | 0      | kleiner LLOQ | #VALUE! | 1    | #VALUE! |
| 0            | T8/T9 | F03 | 0     | 0      | kleiner LLOQ | #VALUE! | 1    | #VALUE! |
| 0            | T8/T9 | F04 | 0     | 0      | kleiner LLOQ | #VALUE! | 1    | #VALUE! |
| T9KIS21      | T8/T9 | F05 | 0     | 0      | kleiner LLOQ | #VALUE! | 1    | #VALUE! |
| T9KIS21      | T8/T9 | F06 | 0     | 0      | kleiner LLOQ | #VALUE! | 1    | #VALUE! |
| T9KIS22      | T8/T9 | F07 | 0     | 0      | kleiner LLOQ | #VALUE! | 1    | #VALUE! |
| T9KIS22      | T8/T9 | F08 | 0     | 0      | kleiner LLOQ | #VALUE! | 1    | #VALUE! |
| T9KIS23      | T8/T9 | F09 | 0     | 0      | kleiner LLOQ | #VALUE! | 1    | #VALUE! |
| T9KIS23      | T8/T9 | F10 | 0     | 0      | kleiner LLOQ | #VALUE! | 1    | #VALUE! |
| T9KIS24      | T8/T9 | F11 | 0     | 0      | kleiner LLOQ | #VALUE! | 1    | #VALUE! |
| T9KIS24      | T8/T9 | F12 | 0     | 0      | kleiner LLOQ | #VALUE! | 1    | #VALUE! |
| 0            | T8/T9 | G01 | 0     | 0      | kleiner LLOQ | #VALUE! | 1    | #VALUE! |
| 0            | T8/T9 | G02 | 0     | 0      | kleiner LLOQ | #VALUE! | 1    | #VALUE! |
| 0            | T8/T9 | G03 | 0     | 0      | kleiner LLOQ | #VALUE! | 1    | #VALUE! |
| 0            | T8/T9 | G04 | 0     | 0      | kleiner LLOQ | #VALUE! | 1    | #VALUE! |
| 0            | T8/T9 | G05 | 0     | 0      | kleiner LLOQ | #VALUE! | 1    | #VALUE! |
| 0            | T8/T9 | G06 | 0     | 0      | kleiner LLOQ | #VALUE! | 1    | #VALUE! |
| Blank PEG    | T8/T9 | G07 | 0.000 | -0.051 | kleiner LLOQ | #VALUE! | 2.75 | #VALUE! |
| Blank PEG    | T8/T9 | G08 | 0.000 | -0.051 | kleiner LLOQ | #VALUE! | 2.75 | #VALUE! |
| Blank PEG    | T8/T9 | G09 | 0.000 | -0.051 | kleiner LLOQ | #VALUE! | 2.75 | #VALUE! |
| Blank PEG    | T8/T9 | G10 | 0.000 | -0.051 | kleiner LLOQ | #VALUE! | 2.75 | #VALUE! |
| Blank PEG    | T8/T9 | G11 | 0.000 | -0.051 | kleiner LLOQ | #VALUE! | 2.75 | #VALUE! |
| Blank PEG    | T8/T9 | G12 | 0.000 | -0.051 | kleiner LLOQ | #VALUE! | 2.75 | #VALUE! |
| 0            | T8/T9 | H01 | 0     | 0      | kleiner LLOQ | #VALUE! | 1    | #VALUE! |
| 0            | T8/T9 | H02 | 0     | 0      | kleiner LLOQ | #VALUE! | 1    | #VALUE! |
| 0            | T8/T9 | H03 | 0     | 0      | kleiner LLOQ | #VALUE! | 1    | #VALUE! |
| 0            | T8/T9 | H04 | 0     | 0      | kleiner LLOQ | #VALUE! | 1    | #VALUE! |
| 0            | T8/T9 | H05 | 0     | 0      | kleiner LLOQ | #VALUE! | 1    | #VALUE! |
| 0            | T8/T9 | H06 | 0     | 0      | kleiner LLOQ | #VALUE! | 1    | #VALUE! |
| Blank no PEG | T8/T9 | H07 | 0.000 | -0.051 | kleiner LLOQ | #VALUE! | 2.75 | #VALUE! |
| Blank no PEG | T8/T9 | H08 | 0.000 | -0.051 | kleiner LLOQ | #VALUE! | 2.75 | #VALUE! |
| Blank no PEG | T8/T9 | H09 | 0.000 | -0.051 | kleiner LLOQ | #VALUE! | 2.75 | #VALUE! |
| Blank no PEG | T8/T9 | H10 | 0.000 | -0.051 | kleiner LLOQ | #VALUE! | 2.75 | #VALUE! |
| Blank no PEG | T8/T9 | H11 | 0.000 | -0.051 | kleiner LLOQ | #VALUE! | 2.75 | #VALUE! |
| Blank no PEG | T8/T9 | H12 | 0.000 | -0.051 | kleiner LLOQ | #VALUE! | 2.75 | #VALUE! |

|          |         |     |   |              |         |    |         |
|----------|---------|-----|---|--------------|---------|----|---------|
| 0        | T10/T11 | A01 | 0 | kleiner LLOQ | #VALUE! | 2  | #VALUE! |
| 0        | T10/T11 | A02 | 0 | kleiner LLOQ | #VALUE! | 3  | #VALUE! |
| 0        | T10/T11 | A03 | 0 | kleiner LLOQ | #VALUE! | 4  | #VALUE! |
| 0        | T10/T11 | A04 | 0 | kleiner LLOQ | #VALUE! | 5  | #VALUE! |
| T10KiN1  | T10/T11 | A05 | 0 | kleiner LLOQ | #VALUE! | 6  | #VALUE! |
| T10KiN1  | T10/T11 | A06 | 0 | kleiner LLOQ | #VALUE! | 7  | #VALUE! |
| T10KiN2  | T10/T11 | A07 | 0 | kleiner LLOQ | #VALUE! | 8  | #VALUE! |
| T10KiN2  | T10/T11 | A08 | 0 | kleiner LLOQ | #VALUE! | 9  | #VALUE! |
| T10KiN3  | T10/T11 | A09 | 0 | kleiner LLOQ | #VALUE! | 10 | #VALUE! |
| T10KiN3  | T10/T11 | A10 | 0 | kleiner LLOQ | #VALUE! | 11 | #VALUE! |
| T10KiN4  | T10/T11 | A11 | 0 | kleiner LLOQ | #VALUE! | 12 | #VALUE! |
| T10KiN4  | T10/T11 | A12 | 0 | kleiner LLOQ | #VALUE! | 13 | #VALUE! |
| 0        | T10/T11 | B01 | 0 | kleiner LLOQ | #VALUE! | 14 | #VALUE! |
| 0        | T10/T11 | B02 | 0 | kleiner LLOQ | #VALUE! | 15 | #VALUE! |
| 0        | T10/T11 | B03 | 0 | kleiner LLOQ | #VALUE! | 16 | #VALUE! |
| 0        | T10/T11 | B04 | 0 | kleiner LLOQ | #VALUE! | 17 | #VALUE! |
| T10KiS11 | T10/T11 | B05 | 0 | kleiner LLOQ | #VALUE! | 18 | #VALUE! |
| T10KiS11 | T10/T11 | B06 | 0 | kleiner LLOQ | #VALUE! | 19 | #VALUE! |
| T10KiS12 | T10/T11 | B07 | 0 | kleiner LLOQ | #VALUE! | 20 | #VALUE! |
| T10KiS12 | T10/T11 | B08 | 0 | kleiner LLOQ | #VALUE! | 21 | #VALUE! |
| T10KiS13 | T10/T11 | B09 | 0 | kleiner LLOQ | #VALUE! | 22 | #VALUE! |
| T10KiS13 | T10/T11 | B10 | 0 | kleiner LLOQ | #VALUE! | 23 | #VALUE! |
| T10KiS14 | T10/T11 | B11 | 0 | kleiner LLOQ | #VALUE! | 24 | #VALUE! |
| T10KiS14 | T10/T11 | B12 | 0 | kleiner LLOQ | #VALUE! | 25 | #VALUE! |
| 0        | T10/T11 | C01 | 0 | kleiner LLOQ | #VALUE! | 26 | #VALUE! |
| 0        | T10/T11 | C02 | 0 | kleiner LLOQ | #VALUE! | 27 | #VALUE! |
| 0        | T10/T11 | C03 | 0 | kleiner LLOQ | #VALUE! | 28 | #VALUE! |
| 0        | T10/T11 | C04 | 0 | kleiner LLOQ | #VALUE! | 29 | #VALUE! |
| T10KiS21 | T10/T11 | C05 | 0 | kleiner LLOQ | #VALUE! | 30 | #VALUE! |
| T10KiS21 | T10/T11 | C06 | 0 | kleiner LLOQ | #VALUE! | 31 | #VALUE! |
| T10KiS22 | T10/T11 | C07 | 0 | kleiner LLOQ | #VALUE! | 32 | #VALUE! |
| T10KiS22 | T10/T11 | C08 | 0 | kleiner LLOQ | #VALUE! | 33 | #VALUE! |
| T10KiS23 | T10/T11 | C09 | 0 | kleiner LLOQ | #VALUE! | 34 | #VALUE! |
| T10KiS23 | T10/T11 | C10 | 0 | kleiner LLOQ | #VALUE! | 35 | #VALUE! |
| T10KiS24 | T10/T11 | C11 | 0 | kleiner LLOQ | #VALUE! | 36 | #VALUE! |
| T10KiS24 | T10/T11 | C12 | 0 | kleiner LLOQ | #VALUE! | 37 | #VALUE! |
| 0        | T10/T11 | D01 | 0 | kleiner LLOQ | #VALUE! | 38 | #VALUE! |
| 0        | T10/T11 | D02 | 0 | kleiner LLOQ | #VALUE! | 39 | #VALUE! |
| 0        | T10/T11 | D03 | 0 | kleiner LLOQ | #VALUE! | 40 | #VALUE! |
| 0        | T10/T11 | D04 | 0 | kleiner LLOQ | #VALUE! | 41 | #VALUE! |
| T11KiN1  | T10/T11 | D05 | 0 | kleiner LLOQ | #VALUE! | 42 | #VALUE! |
| T11KiN1  | T10/T11 | D06 | 0 | kleiner LLOQ | #VALUE! | 43 | #VALUE! |
| T11KiN2  | T10/T11 | D07 | 0 | kleiner LLOQ | #VALUE! | 44 | #VALUE! |
| T11KiN2  | T10/T11 | D08 | 0 | kleiner LLOQ | #VALUE! | 45 | #VALUE! |
| T11KiN3  | T10/T11 | D09 | 0 | kleiner LLOQ | #VALUE! | 46 | #VALUE! |
| T11KiN3  | T10/T11 | D10 | 0 | kleiner LLOQ | #VALUE! | 47 | #VALUE! |
| T11KiN4  | T10/T11 | D11 | 0 | kleiner LLOQ | #VALUE! | 48 | #VALUE! |
| T11KiN4  | T10/T11 | D12 | 0 | kleiner LLOQ | #VALUE! | 49 | #VALUE! |

Plate: T10/T11

|   | 1 | 2 | 3 | 4 | 5 | 6 | 7 | 8 | 9 | 10 | 11 | 12 |
|---|---|---|---|---|---|---|---|---|---|----|----|----|
| A |   |   |   |   |   |   |   |   |   |    |    |    |
| B |   |   |   |   |   |   |   |   |   |    |    |    |
| C |   |   |   |   |   |   |   |   |   |    |    |    |
| D |   |   |   |   |   |   |   |   |   |    |    |    |
| E |   |   |   |   |   |   |   |   |   |    |    |    |
| F |   |   |   |   |   |   |   |   |   |    |    |    |
| G |   |   |   |   |   |   |   |   |   |    |    |    |
| H |   |   |   |   |   |   |   |   |   |    |    |    |

Plattenbelegung

|   | 1 | 2 | 3 | 4 | 5        | 6        | 7            | 8            | 9            | 10           | 11           | 12           |
|---|---|---|---|---|----------|----------|--------------|--------------|--------------|--------------|--------------|--------------|
| A |   |   |   |   | T10KiN1  | T10KiN1  | T10KiN2      | T10KiN2      | T10KiN3      | T10KiN3      | T10KiN4      | T10KiN4      |
| B |   |   |   |   | T10KiS11 | T10KiS11 | T10KiS12     | T10KiS12     | T10KiS13     | T10KiS13     | T10KiS14     | T10KiS14     |
| C |   |   |   |   | T10KiS21 | T10KiS21 | T10KiS22     | T10KiS22     | T10KiS23     | T10KiS23     | T10KiS24     | T10KiS24     |
| D |   |   |   |   | T11KiN1  | T11KiN1  | T11KiN2      | T11KiN2      | T11KiN3      | T11KiN3      | T11KiN4      | T11KiN4      |
| E |   |   |   |   | T11KiS11 | T11KiS11 | T11KiS12     | T11KiS12     | T11KiS13     | T11KiS13     | T11KiS14     | T11KiS14     |
| F |   |   |   |   | T11KiS21 | T11KiS21 | T11KiS22     | T11KiS22     | T11KiS23     | T11KiS23     | T11KiS24     | T11KiS24     |
| G |   |   |   |   |          |          | Blank PEG    | Blank PEG    | Blank PEG    | Blank PEG    | Blank PEG    | Blank PEG    |
| H |   |   |   |   |          |          | Blank no PEG | Blank no PEG | Blank no PEG | Blank no PEG | Blank no PEG | Blank no PEG |

Comment:

alle Messwerte bei lin low

Date Operator Date Control

|              |         |     |   |              |         |     |         |
|--------------|---------|-----|---|--------------|---------|-----|---------|
| 0            | T10/T11 | E01 | 0 | kleiner LLOQ | #VALUE! | 50  | #VALUE! |
| 0            | T10/T11 | E02 | 0 | kleiner LLOQ | #VALUE! | 51  | #VALUE! |
| 0            | T10/T11 | E03 | 0 | kleiner LLOQ | #VALUE! | 52  | #VALUE! |
| 0            | T10/T11 | E04 | 0 | kleiner LLOQ | #VALUE! | 53  | #VALUE! |
| T11KIS11     | T10/T11 | E05 | 0 | kleiner LLOQ | #VALUE! | 54  | #VALUE! |
| T11KIS11     | T10/T11 | E06 | 0 | kleiner LLOQ | #VALUE! | 55  | #VALUE! |
| T11KIS12     | T10/T11 | E07 | 0 | kleiner LLOQ | #VALUE! | 56  | #VALUE! |
| T11KIS12     | T10/T11 | E08 | 0 | kleiner LLOQ | #VALUE! | 57  | #VALUE! |
| T11KIS13     | T10/T11 | E09 | 0 | kleiner LLOQ | #VALUE! | 58  | #VALUE! |
| T11KIS13     | T10/T11 | E10 | 0 | kleiner LLOQ | #VALUE! | 59  | #VALUE! |
| T11KIS14     | T10/T11 | E11 | 0 | kleiner LLOQ | #VALUE! | 60  | #VALUE! |
| T11KIS14     | T10/T11 | E12 | 0 | kleiner LLOQ | #VALUE! | 61  | #VALUE! |
| 0            | T10/T11 | F01 | 0 | kleiner LLOQ | #VALUE! | 62  | #VALUE! |
| 0            | T10/T11 | F02 | 0 | kleiner LLOQ | #VALUE! | 63  | #VALUE! |
| 0            | T10/T11 | F03 | 0 | kleiner LLOQ | #VALUE! | 64  | #VALUE! |
| 0            | T10/T11 | F04 | 0 | kleiner LLOQ | #VALUE! | 65  | #VALUE! |
| T11KIS21     | T10/T11 | F05 | 0 | kleiner LLOQ | #VALUE! | 66  | #VALUE! |
| T11KIS21     | T10/T11 | F06 | 0 | kleiner LLOQ | #VALUE! | 67  | #VALUE! |
| T11KIS22     | T10/T11 | F07 | 0 | kleiner LLOQ | #VALUE! | 68  | #VALUE! |
| T11KIS22     | T10/T11 | F08 | 0 | kleiner LLOQ | #VALUE! | 69  | #VALUE! |
| T11KIS23     | T10/T11 | F09 | 0 | kleiner LLOQ | #VALUE! | 70  | #VALUE! |
| T11KIS23     | T10/T11 | F10 | 0 | kleiner LLOQ | #VALUE! | 71  | #VALUE! |
| T11KIS24     | T10/T11 | F11 | 0 | kleiner LLOQ | #VALUE! | 72  | #VALUE! |
| T11KIS24     | T10/T11 | F12 | 0 | kleiner LLOQ | #VALUE! | 73  | #VALUE! |
| 0            | T10/T11 | G01 | 0 | kleiner LLOQ | #VALUE! | 74  | #VALUE! |
| 0            | T10/T11 | G02 | 0 | kleiner LLOQ | #VALUE! | 75  | #VALUE! |
| 0            | T10/T11 | G03 | 0 | kleiner LLOQ | #VALUE! | 76  | #VALUE! |
| 0            | T10/T11 | G04 | 0 | kleiner LLOQ | #VALUE! | 77  | #VALUE! |
| 0            | T10/T11 | G05 | 0 | kleiner LLOQ | #VALUE! | 78  | #VALUE! |
| 0            | T10/T11 | G06 | 0 | kleiner LLOQ | #VALUE! | 79  | #VALUE! |
| Blank PEG    | T10/T11 | G07 | 0 | kleiner LLOQ | #VALUE! | 80  | #VALUE! |
| Blank PEG    | T10/T11 | G08 | 0 | kleiner LLOQ | #VALUE! | 81  | #VALUE! |
| Blank PEG    | T10/T11 | G09 | 0 | kleiner LLOQ | #VALUE! | 82  | #VALUE! |
| Blank PEG    | T10/T11 | G10 | 0 | kleiner LLOQ | #VALUE! | 83  | #VALUE! |
| Blank PEG    | T10/T11 | G11 | 0 | kleiner LLOQ | #VALUE! | 84  | #VALUE! |
| Blank PEG    | T10/T11 | G12 | 0 | kleiner LLOQ | #VALUE! | 85  | #VALUE! |
| 0            | T10/T11 | H01 | 0 | kleiner LLOQ | #VALUE! | 86  | #VALUE! |
| 0            | T10/T11 | H02 | 0 | kleiner LLOQ | #VALUE! | 87  | #VALUE! |
| 0            | T10/T11 | H03 | 0 | kleiner LLOQ | #VALUE! | 88  | #VALUE! |
| 0            | T10/T11 | H04 | 0 | kleiner LLOQ | #VALUE! | 89  | #VALUE! |
| 0            | T10/T11 | H05 | 0 | kleiner LLOQ | #VALUE! | 90  | #VALUE! |
| 0            | T10/T11 | H06 | 0 | kleiner LLOQ | #VALUE! | 91  | #VALUE! |
| Blank no PEG | T10/T11 | H07 | 0 | kleiner LLOQ | #VALUE! | 92  | #VALUE! |
| Blank no PEG | T10/T11 | H08 | 0 | kleiner LLOQ | #VALUE! | 93  | #VALUE! |
| Blank no PEG | T10/T11 | H09 | 0 | kleiner LLOQ | #VALUE! | 94  | #VALUE! |
| Blank no PEG | T10/T11 | H10 | 0 | kleiner LLOQ | #VALUE! | 95  | #VALUE! |
| Blank no PEG | T10/T11 | H11 | 0 | kleiner LLOQ | #VALUE! | 96  | #VALUE! |
| Blank no PEG | T10/T11 | H12 | 0 | kleiner LLOQ | #VALUE! | 97  | #VALUE! |
| 0            | T12/T13 | A01 | 0 | kleiner LLOQ | #VALUE! | 98  | #VALUE! |
| 0            | T12/T13 | A02 | 0 | kleiner LLOQ | #VALUE! | 99  | #VALUE! |
| 0            | T12/T13 | A03 | 0 | kleiner LLOQ | #VALUE! | 100 | #VALUE! |
| 0            | T12/T13 | A04 | 0 | kleiner LLOQ | #VALUE! | 101 | #VALUE! |
| T12KIN1      | T12/T13 | A05 | 0 | kleiner LLOQ | #VALUE! | 102 | #VALUE! |
| T12KIN1      | T12/T13 | A06 | 0 | kleiner LLOQ | #VALUE! | 103 | #VALUE! |
| T12KIN2      | T12/T13 | A07 | 0 | kleiner LLOQ | #VALUE! | 104 | #VALUE! |
| T12KIN2      | T12/T13 | A08 | 0 | kleiner LLOQ | #VALUE! | 105 | #VALUE! |
| T12KIN3      | T12/T13 | A09 | 0 | kleiner LLOQ | #VALUE! | 106 | #VALUE! |
| T12KIN3      | T12/T13 | A10 | 0 | kleiner LLOQ | #VALUE! | 107 | #VALUE! |
| T12KIN4      | T12/T13 | A11 | 0 | kleiner LLOQ | #VALUE! | 108 | #VALUE! |
| T12KIN4      | T12/T13 | A12 | 0 | kleiner LLOQ | #VALUE! | 109 | #VALUE! |
| 0            | T12/T13 | B01 | 0 | kleiner LLOQ | #VALUE! | 110 | #VALUE! |
| 0            | T12/T13 | B02 | 0 | kleiner LLOQ | #VALUE! | 111 | #VALUE! |
| 0            | T12/T13 | B03 | 0 | kleiner LLOQ | #VALUE! | 112 | #VALUE! |
| 0            | T12/T13 | B04 | 0 | kleiner LLOQ | #VALUE! | 113 | #VALUE! |
| T12KIS11     | T12/T13 | B05 | 0 | kleiner LLOQ | #VALUE! | 114 | #VALUE! |
| T12KIS11     | T12/T13 | B06 | 0 | kleiner LLOQ | #VALUE! | 115 | #VALUE! |
| T12KIS12     | T12/T13 | B07 | 0 | kleiner LLOQ | #VALUE! | 116 | #VALUE! |
| T12KIS12     | T12/T13 | B08 | 0 | kleiner LLOQ | #VALUE! | 117 | #VALUE! |
| T12KIS13     | T12/T13 | B09 | 0 | kleiner LLOQ | #VALUE! | 118 | #VALUE! |
| T12KIS13     | T12/T13 | B10 | 0 | kleiner LLOQ | #VALUE! | 119 | #VALUE! |
| T12KIS14     | T12/T13 | B11 | 0 | kleiner LLOQ | #VALUE! | 120 | #VALUE! |
| T12KIS14     | T12/T13 | B12 | 0 | kleiner LLOQ | #VALUE! | 121 | #VALUE! |
| 0            | T12/T13 | C01 | 0 | kleiner LLOQ | #VALUE! | 122 | #VALUE! |
| 0            | T12/T13 | C02 | 0 | kleiner LLOQ | #VALUE! | 123 | #VALUE! |
| 0            | T12/T13 | C03 | 0 | kleiner LLOQ | #VALUE! | 124 | #VALUE! |
| 0            | T12/T13 | C04 | 0 | kleiner LLOQ | #VALUE! | 125 | #VALUE! |
| T12KIS21     | T12/T13 | C05 | 0 | kleiner LLOQ | #VALUE! | 126 | #VALUE! |
| T12KIS21     | T12/T13 | C06 | 0 | kleiner LLOQ | #VALUE! | 127 | #VALUE! |
| T12KIS22     | T12/T13 | C07 | 0 | kleiner LLOQ | #VALUE! | 128 | #VALUE! |
| T12KIS22     | T12/T13 | C08 | 0 | kleiner LLOQ | #VALUE! | 129 | #VALUE! |
| T12KIS23     | T12/T13 | C09 | 0 | kleiner LLOQ | #VALUE! | 130 | #VALUE! |

Plate: T12/T13

|   |   |   |   |   |   |   |   |   |   |    |    |    |
|---|---|---|---|---|---|---|---|---|---|----|----|----|
|   | 1 | 2 | 3 | 4 | 5 | 6 | 7 | 8 | 9 | 10 | 11 | 12 |
| A |   |   |   |   |   |   |   |   |   |    |    |    |
| B |   |   |   |   |   |   |   |   |   |    |    |    |
| C |   |   |   |   |   |   |   |   |   |    |    |    |
| D |   |   |   |   |   |   |   |   |   |    |    |    |
| E |   |   |   |   |   |   |   |   |   |    |    |    |
| F |   |   |   |   |   |   |   |   |   |    |    |    |
| G |   |   |   |   |   |   |   |   |   |    |    |    |
| H |   |   |   |   |   |   |   |   |   |    |    |    |

Plattenbelegung

|   |   |   |   |   |          |          |          |          |          |              |              |              |
|---|---|---|---|---|----------|----------|----------|----------|----------|--------------|--------------|--------------|
|   | 1 | 2 | 3 | 4 | 5        | 6        | 7        | 8        | 9        | 10           | 11           | 12           |
| A |   |   |   |   | T12KIN1  | T12KIN1  | T12KIN2  | T12KIN3  | T12KIN3  | T12KIN3      | T12KIN4      | T12KIN4      |
| B |   |   |   |   | T12KIS11 | T12KIS11 | T12KIS12 | T12KIS12 | T12KIS13 | T12KIS13     | T12KIS14     | T12KIS14     |
| C |   |   |   |   | T12KIS21 | T12KIS21 | T12KIS22 | T12KIS22 | T12KIS23 | T12KIS23     | T12KIS24     | T12KIS24     |
| D |   |   |   |   | T13KIN1  | T13KIN1  | T13KIN2  | T13KIN2  | T13KIN3  | T13KIN3      | T13KIN4      | T13KIN4      |
| E |   |   |   |   | T13KIS11 | T13KIS11 | T13KIS12 | T13KIS12 | T13KIS13 | T13KIS13     | T13KIS14     | T13KIS14     |
| F |   |   |   |   | T13KIS21 | T13KIS21 | T13KIS22 | T13KIS22 | T13KIS23 | T13KIS23     | T13KIS24     | T13KIS24     |
| G |   |   |   |   |          |          |          |          |          | Blank PEG    | Blank PEG    | Blank PEG    |
| H |   |   |   |   |          |          |          |          |          | Blank no PEG | Blank no PEG | Blank no PEG |

Comment:

alle Messwerte bei lin low

|              |         |     |   |   |              |         |     |         |
|--------------|---------|-----|---|---|--------------|---------|-----|---------|
| T12KIS23     | T12/T13 | C10 | 0 | 0 | kleiner LLOQ | #VALUE! | 131 | #VALUE! |
| T12KIS24     | T12/T13 | C11 | 0 | 0 | kleiner LLOQ | #VALUE! | 132 | #VALUE! |
| T12KIS24     | T12/T13 | C12 | 0 | 0 | kleiner LLOQ | #VALUE! | 133 | #VALUE! |
| 0            | T12/T13 | D01 | 0 | 0 | kleiner LLOQ | #VALUE! | 134 | #VALUE! |
| 0            | T12/T13 | D02 | 0 | 0 | kleiner LLOQ | #VALUE! | 135 | #VALUE! |
| 0            | T12/T13 | D03 | 0 | 0 | kleiner LLOQ | #VALUE! | 136 | #VALUE! |
| 0            | T12/T13 | D04 | 0 | 0 | kleiner LLOQ | #VALUE! | 137 | #VALUE! |
| T13KIN1      | T12/T13 | D05 | 0 | 0 | kleiner LLOQ | #VALUE! | 138 | #VALUE! |
| T13KIN1      | T12/T13 | D06 | 0 | 0 | kleiner LLOQ | #VALUE! | 139 | #VALUE! |
| T13KIN2      | T12/T13 | D07 | 0 | 0 | kleiner LLOQ | #VALUE! | 140 | #VALUE! |
| T13KIN2      | T12/T13 | D08 | 0 | 0 | kleiner LLOQ | #VALUE! | 141 | #VALUE! |
| T13KIN3      | T12/T13 | D09 | 0 | 0 | kleiner LLOQ | #VALUE! | 142 | #VALUE! |
| T13KIN3      | T12/T13 | D10 | 0 | 0 | kleiner LLOQ | #VALUE! | 143 | #VALUE! |
| T13KIN4      | T12/T13 | D11 | 0 | 0 | kleiner LLOQ | #VALUE! | 144 | #VALUE! |
| T13KIN4      | T12/T13 | D12 | 0 | 0 | kleiner LLOQ | #VALUE! | 145 | #VALUE! |
| 0            | T12/T13 | E01 | 0 | 0 | kleiner LLOQ | #VALUE! | 146 | #VALUE! |
| 0            | T12/T13 | E02 | 0 | 0 | kleiner LLOQ | #VALUE! | 147 | #VALUE! |
| 0            | T12/T13 | E03 | 0 | 0 | kleiner LLOQ | #VALUE! | 148 | #VALUE! |
| 0            | T12/T13 | E04 | 0 | 0 | kleiner LLOQ | #VALUE! | 149 | #VALUE! |
| T13KIS11     | T12/T13 | E05 | 0 | 0 | kleiner LLOQ | #VALUE! | 150 | #VALUE! |
| T13KIS11     | T12/T13 | E06 | 0 | 0 | kleiner LLOQ | #VALUE! | 151 | #VALUE! |
| T13KIS12     | T12/T13 | E07 | 0 | 0 | kleiner LLOQ | #VALUE! | 152 | #VALUE! |
| T13KIS12     | T12/T13 | E08 | 0 | 0 | kleiner LLOQ | #VALUE! | 153 | #VALUE! |
| T13KIS13     | T12/T13 | E09 | 0 | 0 | kleiner LLOQ | #VALUE! | 154 | #VALUE! |
| T13KIS13     | T12/T13 | E10 | 0 | 0 | kleiner LLOQ | #VALUE! | 155 | #VALUE! |
| T13KIS14     | T12/T13 | E11 | 0 | 0 | kleiner LLOQ | #VALUE! | 156 | #VALUE! |
| T13KIS14     | T12/T13 | E12 | 0 | 0 | kleiner LLOQ | #VALUE! | 157 | #VALUE! |
| 0            | T12/T13 | F01 | 0 | 0 | kleiner LLOQ | #VALUE! | 158 | #VALUE! |
| 0            | T12/T13 | F02 | 0 | 0 | kleiner LLOQ | #VALUE! | 159 | #VALUE! |
| 0            | T12/T13 | F03 | 0 | 0 | kleiner LLOQ | #VALUE! | 160 | #VALUE! |
| 0            | T12/T13 | F04 | 0 | 0 | kleiner LLOQ | #VALUE! | 161 | #VALUE! |
| T13KIS21     | T12/T13 | F05 | 0 | 0 | kleiner LLOQ | #VALUE! | 162 | #VALUE! |
| T13KIS21     | T12/T13 | F06 | 0 | 0 | kleiner LLOQ | #VALUE! | 163 | #VALUE! |
| T13KIS22     | T12/T13 | F07 | 0 | 0 | kleiner LLOQ | #VALUE! | 164 | #VALUE! |
| T13KIS22     | T12/T13 | F08 | 0 | 0 | kleiner LLOQ | #VALUE! | 165 | #VALUE! |
| T13KIS23     | T12/T13 | F09 | 0 | 0 | kleiner LLOQ | #VALUE! | 166 | #VALUE! |
| T13KIS23     | T12/T13 | F10 | 0 | 0 | kleiner LLOQ | #VALUE! | 167 | #VALUE! |
| T13KIS24     | T12/T13 | F11 | 0 | 0 | kleiner LLOQ | #VALUE! | 168 | #VALUE! |
| T13KIS24     | T12/T13 | F12 | 0 | 0 | kleiner LLOQ | #VALUE! | 169 | #VALUE! |
| 0            | T12/T13 | G01 | 0 | 0 | kleiner LLOQ | #VALUE! | 170 | #VALUE! |
| 0            | T12/T13 | G02 | 0 | 0 | kleiner LLOQ | #VALUE! | 171 | #VALUE! |
| 0            | T12/T13 | G03 | 0 | 0 | kleiner LLOQ | #VALUE! | 172 | #VALUE! |
| 0            | T12/T13 | G04 | 0 | 0 | kleiner LLOQ | #VALUE! | 173 | #VALUE! |
| 0            | T12/T13 | G05 | 0 | 0 | kleiner LLOQ | #VALUE! | 174 | #VALUE! |
| 0            | T12/T13 | G06 | 0 | 0 | kleiner LLOQ | #VALUE! | 175 | #VALUE! |
| Blank PEG    | T12/T13 | G07 | 0 | 0 | kleiner LLOQ | #VALUE! | 176 | #VALUE! |
| Blank PEG    | T12/T13 | G08 | 0 | 0 | kleiner LLOQ | #VALUE! | 177 | #VALUE! |
| Blank PEG    | T12/T13 | G09 | 0 | 0 | kleiner LLOQ | #VALUE! | 178 | #VALUE! |
| Blank PEG    | T12/T13 | G10 | 0 | 0 | kleiner LLOQ | #VALUE! | 179 | #VALUE! |
| Blank PEG    | T12/T13 | G11 | 0 | 0 | kleiner LLOQ | #VALUE! | 180 | #VALUE! |
| Blank PEG    | T12/T13 | G12 | 0 | 0 | kleiner LLOQ | #VALUE! | 181 | #VALUE! |
| 0            | T12/T13 | H01 | 0 | 0 | kleiner LLOQ | #VALUE! | 182 | #VALUE! |
| 0            | T12/T13 | H02 | 0 | 0 | kleiner LLOQ | #VALUE! | 183 | #VALUE! |
| 0            | T12/T13 | H03 | 0 | 0 | kleiner LLOQ | #VALUE! | 184 | #VALUE! |
| 0            | T12/T13 | H04 | 0 | 0 | kleiner LLOQ | #VALUE! | 185 | #VALUE! |
| 0            | T12/T13 | H05 | 0 | 0 | kleiner LLOQ | #VALUE! | 186 | #VALUE! |
| 0            | T12/T13 | H06 | 0 | 0 | kleiner LLOQ | #VALUE! | 187 | #VALUE! |
| Blank no PEG | T12/T13 | H07 | 0 | 0 | kleiner LLOQ | #VALUE! | 188 | #VALUE! |
| Blank no PEG | T12/T13 | H08 | 0 | 0 | kleiner LLOQ | #VALUE! | 189 | #VALUE! |
| Blank no PEG | T12/T13 | H09 | 0 | 0 | kleiner LLOQ | #VALUE! | 190 | #VALUE! |
| Blank no PEG | T12/T13 | H10 | 0 | 0 | kleiner LLOQ | #VALUE! | 191 | #VALUE! |
| Blank no PEG | T12/T13 | H11 | 0 | 0 | kleiner LLOQ | #VALUE! | 192 | #VALUE! |
| Blank no PEG | T12/T13 | H12 | 0 | 0 | kleiner LLOQ | #VALUE! | 193 | #VALUE! |

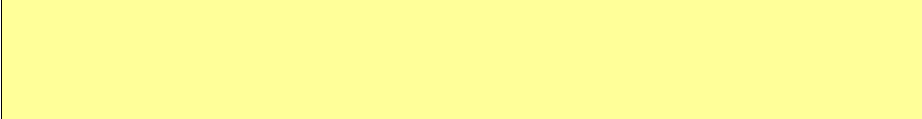

Date Operator Date Control



|           |     |     |   |              |         |     |         |
|-----------|-----|-----|---|--------------|---------|-----|---------|
| 0         | T14 | A01 | 0 | kleiner LLOQ | #VALUE! | 194 | #VALUE! |
| 0         | T14 | A02 | 0 | kleiner LLOQ | #VALUE! | 195 | #VALUE! |
| 0         | T14 | A03 | 0 | kleiner LLOQ | #VALUE! | 196 | #VALUE! |
| 0         | T14 | A04 | 0 | kleiner LLOQ | #VALUE! | 197 | #VALUE! |
| T14KiIN1  | T14 | A05 | 0 | kleiner LLOQ | #VALUE! | 198 | #VALUE! |
| T14KiIN1  | T14 | A06 | 0 | kleiner LLOQ | #VALUE! | 199 | #VALUE! |
| T14KiIN2  | T14 | A07 | 0 | kleiner LLOQ | #VALUE! | 200 | #VALUE! |
| T14KiIN2  | T14 | A08 | 0 | kleiner LLOQ | #VALUE! | 201 | #VALUE! |
| T14KiIN3  | T14 | A09 | 0 | kleiner LLOQ | #VALUE! | 202 | #VALUE! |
| T14KiIN3  | T14 | A10 | 0 | kleiner LLOQ | #VALUE! | 203 | #VALUE! |
| T14KiIN4  | T14 | A11 | 0 | kleiner LLOQ | #VALUE! | 204 | #VALUE! |
| T14KiIN4  | T14 | A12 | 0 | kleiner LLOQ | #VALUE! | 205 | #VALUE! |
| 0         | T14 | B01 | 0 | kleiner LLOQ | #VALUE! | 206 | #VALUE! |
| 0         | T14 | B02 | 0 | kleiner LLOQ | #VALUE! | 207 | #VALUE! |
| 0         | T14 | B03 | 0 | kleiner LLOQ | #VALUE! | 208 | #VALUE! |
| 0         | T14 | B04 | 0 | kleiner LLOQ | #VALUE! | 209 | #VALUE! |
| T14KiIS11 | T14 | B05 | 0 | kleiner LLOQ | #VALUE! | 210 | #VALUE! |
| T14KiIS11 | T14 | B06 | 0 | kleiner LLOQ | #VALUE! | 211 | #VALUE! |
| T14KiIS12 | T14 | B07 | 0 | kleiner LLOQ | #VALUE! | 212 | #VALUE! |
| T14KiIS12 | T14 | B08 | 0 | kleiner LLOQ | #VALUE! | 213 | #VALUE! |
| T14KiIS13 | T14 | B09 | 0 | kleiner LLOQ | #VALUE! | 214 | #VALUE! |
| T14KiIS13 | T14 | B10 | 0 | kleiner LLOQ | #VALUE! | 215 | #VALUE! |
| T14KiIS14 | T14 | B11 | 0 | kleiner LLOQ | #VALUE! | 216 | #VALUE! |
| T14KiIS14 | T14 | B12 | 0 | kleiner LLOQ | #VALUE! | 217 | #VALUE! |
| 0         | T14 | C01 | 0 | kleiner LLOQ | #VALUE! | 218 | #VALUE! |
| 0         | T14 | C02 | 0 | kleiner LLOQ | #VALUE! | 219 | #VALUE! |
| 0         | T14 | C03 | 0 | kleiner LLOQ | #VALUE! | 220 | #VALUE! |
| 0         | T14 | C04 | 0 | kleiner LLOQ | #VALUE! | 221 | #VALUE! |
| T14KiIS21 | T14 | C05 | 0 | kleiner LLOQ | #VALUE! | 222 | #VALUE! |
| T14KiIS21 | T14 | C06 | 0 | kleiner LLOQ | #VALUE! | 223 | #VALUE! |
| T14KiIS22 | T14 | C07 | 0 | kleiner LLOQ | #VALUE! | 224 | #VALUE! |
| T14KiIS22 | T14 | C08 | 0 | kleiner LLOQ | #VALUE! | 225 | #VALUE! |
| T14KiIS23 | T14 | C09 | 0 | kleiner LLOQ | #VALUE! | 226 | #VALUE! |
| T14KiIS23 | T14 | C10 | 0 | kleiner LLOQ | #VALUE! | 227 | #VALUE! |
| T14KiIS24 | T14 | C11 | 0 | kleiner LLOQ | #VALUE! | 228 | #VALUE! |
| T14KiIS24 | T14 | C12 | 0 | kleiner LLOQ | #VALUE! | 229 | #VALUE! |
| 0         | T14 | D01 | 0 | kleiner LLOQ | #VALUE! | 230 | #VALUE! |
| 0         | T14 | D02 | 0 | kleiner LLOQ | #VALUE! | 231 | #VALUE! |
| 0         | T14 | D03 | 0 | kleiner LLOQ | #VALUE! | 232 | #VALUE! |
| 0         | T14 | D04 | 0 | kleiner LLOQ | #VALUE! | 233 | #VALUE! |
| 0         | T14 | D05 | 0 | kleiner LLOQ | #VALUE! | 234 | #VALUE! |
| 0         | T14 | D06 | 0 | kleiner LLOQ | #VALUE! | 235 | #VALUE! |
| 0         | T14 | D07 | 0 | kleiner LLOQ | #VALUE! | 236 | #VALUE! |
| 0         | T14 | D08 | 0 | kleiner LLOQ | #VALUE! | 237 | #VALUE! |
| 0         | T14 | D09 | 0 | kleiner LLOQ | #VALUE! | 238 | #VALUE! |
| 0         | T14 | D10 | 0 | kleiner LLOQ | #VALUE! | 239 | #VALUE! |
| 0         | T14 | D11 | 0 | kleiner LLOQ | #VALUE! | 240 | #VALUE! |
| 0         | T14 | D12 | 0 | kleiner LLOQ | #VALUE! | 241 | #VALUE! |
| 0         | T14 | E01 | 0 | kleiner LLOQ | #VALUE! | 242 | #VALUE! |
| 0         | T14 | E02 | 0 | kleiner LLOQ | #VALUE! | 243 | #VALUE! |
| 0         | T14 | E03 | 0 | kleiner LLOQ | #VALUE! | 244 | #VALUE! |
| 0         | T14 | E04 | 0 | kleiner LLOQ | #VALUE! | 245 | #VALUE! |
| 0         | T14 | E05 | 0 | kleiner LLOQ | #VALUE! | 246 | #VALUE! |
| 0         | T14 | E06 | 0 | kleiner LLOQ | #VALUE! | 247 | #VALUE! |
| 0         | T14 | E07 | 0 | kleiner LLOQ | #VALUE! | 248 | #VALUE! |
| 0         | T14 | E08 | 0 | kleiner LLOQ | #VALUE! | 249 | #VALUE! |
| 0         | T14 | E09 | 0 | kleiner LLOQ | #VALUE! | 250 | #VALUE! |

Plate: T14

|   | 1 | 2 | 3 | 4 | 5 | 6 | 7 | 8 | 9 | 10 | 11 | 12 |
|---|---|---|---|---|---|---|---|---|---|----|----|----|
| A |   |   |   |   |   |   |   |   |   |    |    |    |
| B |   |   |   |   |   |   |   |   |   |    |    |    |
| C |   |   |   |   |   |   |   |   |   |    |    |    |
| D |   |   |   |   |   |   |   |   |   |    |    |    |
| E |   |   |   |   |   |   |   |   |   |    |    |    |
| F |   |   |   |   |   |   |   |   |   |    |    |    |
| G |   |   |   |   |   |   |   |   |   |    |    |    |
| H |   |   |   |   |   |   |   |   |   |    |    |    |

Plattenbelegung

|   | 1 | 2 | 3 | 4 | 5         | 6         | 7            | 8            | 9            | 10           | 11           | 12           |
|---|---|---|---|---|-----------|-----------|--------------|--------------|--------------|--------------|--------------|--------------|
| A |   |   |   |   | T14KiIN1  | T14KiIN1  | T14KiIN2     | T14KiIN2     | T14KiIN3     | T14KiIN3     | T14KiIN4     | T14KiIN4     |
| B |   |   |   |   | T14KiIS11 | T14KiIS11 | T14KiIS12    | T14KiIS12    | T14KiIS13    | T14KiIS13    | T14KiIS14    | T14KiIS14    |
| C |   |   |   |   | T14KiIS21 | T14KiIS21 | T14KiIS22    | T14KiIS22    | T14KiIS23    | T14KiIS23    | T14KiIS24    | T14KiIS24    |
| D |   |   |   |   |           |           |              |              |              |              |              |              |
| E |   |   |   |   |           |           |              |              |              |              |              |              |
| F |   |   |   |   |           |           |              |              |              |              |              |              |
| G |   |   |   |   |           |           | Blank PEG    | Blank PEG    | Blank PEG    | Blank PEG    | Blank PEG    | Blank PEG    |
| H |   |   |   |   |           |           | Blank no PEG | Blank no PEG | Blank no PEG | Blank no PEG | Blank no PEG | Blank no PEG |

Comment:

alle Messwerte bei lin low

Date Operator

Date Control

|              |     |     |   |   |              |         |     |         |
|--------------|-----|-----|---|---|--------------|---------|-----|---------|
| 0            | T14 | E10 | 0 | 0 | kleiner LLOQ | #VALUE! | 251 | #VALUE! |
| 0            | T14 | E11 | 0 | 0 | kleiner LLOQ | #VALUE! | 252 | #VALUE! |
| 0            | T14 | E12 | 0 | 0 | kleiner LLOQ | #VALUE! | 253 | #VALUE! |
| 0            | T14 | F01 | 0 | 0 | kleiner LLOQ | #VALUE! | 254 | #VALUE! |
| 0            | T14 | F02 | 0 | 0 | kleiner LLOQ | #VALUE! | 255 | #VALUE! |
| 0            | T14 | F03 | 0 | 0 | kleiner LLOQ | #VALUE! | 256 | #VALUE! |
| 0            | T14 | F04 | 0 | 0 | kleiner LLOQ | #VALUE! | 257 | #VALUE! |
| 0            | T14 | F05 | 0 | 0 | kleiner LLOQ | #VALUE! | 258 | #VALUE! |
| 0            | T14 | F06 | 0 | 0 | kleiner LLOQ | #VALUE! | 259 | #VALUE! |
| 0            | T14 | F07 | 0 | 0 | kleiner LLOQ | #VALUE! | 260 | #VALUE! |
| 0            | T14 | F08 | 0 | 0 | kleiner LLOQ | #VALUE! | 261 | #VALUE! |
| 0            | T14 | F09 | 0 | 0 | kleiner LLOQ | #VALUE! | 262 | #VALUE! |
| 0            | T14 | F10 | 0 | 0 | kleiner LLOQ | #VALUE! | 263 | #VALUE! |
| 0            | T14 | F11 | 0 | 0 | kleiner LLOQ | #VALUE! | 264 | #VALUE! |
| 0            | T14 | F12 | 0 | 0 | kleiner LLOQ | #VALUE! | 265 | #VALUE! |
| 0            | T14 | G01 | 0 | 0 | kleiner LLOQ | #VALUE! | 266 | #VALUE! |
| 0            | T14 | G02 | 0 | 0 | kleiner LLOQ | #VALUE! | 267 | #VALUE! |
| 0            | T14 | G03 | 0 | 0 | kleiner LLOQ | #VALUE! | 268 | #VALUE! |
| 0            | T14 | G04 | 0 | 0 | kleiner LLOQ | #VALUE! | 269 | #VALUE! |
| 0            | T14 | G05 | 0 | 0 | kleiner LLOQ | #VALUE! | 270 | #VALUE! |
| 0            | T14 | G06 | 0 | 0 | kleiner LLOQ | #VALUE! | 271 | #VALUE! |
| Blank PEG    | T14 | G07 | 0 | 0 | kleiner LLOQ | #VALUE! | 272 | #VALUE! |
| Blank PEG    | T14 | G08 | 0 | 0 | kleiner LLOQ | #VALUE! | 273 | #VALUE! |
| Blank PEG    | T14 | G09 | 0 | 0 | kleiner LLOQ | #VALUE! | 274 | #VALUE! |
| Blank PEG    | T14 | G10 | 0 | 0 | kleiner LLOQ | #VALUE! | 275 | #VALUE! |
| Blank PEG    | T14 | G11 | 0 | 0 | kleiner LLOQ | #VALUE! | 276 | #VALUE! |
| Blank PEG    | T14 | G12 | 0 | 0 | kleiner LLOQ | #VALUE! | 277 | #VALUE! |
| 0            | T14 | H01 | 0 | 0 | kleiner LLOQ | #VALUE! | 278 | #VALUE! |
| 0            | T14 | H02 | 0 | 0 | kleiner LLOQ | #VALUE! | 279 | #VALUE! |
| 0            | T14 | H03 | 0 | 0 | kleiner LLOQ | #VALUE! | 280 | #VALUE! |
| 0            | T14 | H04 | 0 | 0 | kleiner LLOQ | #VALUE! | 281 | #VALUE! |
| 0            | T14 | H05 | 0 | 0 | kleiner LLOQ | #VALUE! | 282 | #VALUE! |
| 0            | T14 | H06 | 0 | 0 | kleiner LLOQ | #VALUE! | 283 | #VALUE! |
| Blank no PEG | T14 | H07 | 0 | 0 | kleiner LLOQ | #VALUE! | 284 | #VALUE! |
| Blank no PEG | T14 | H08 | 0 | 0 | kleiner LLOQ | #VALUE! | 285 | #VALUE! |
| Blank no PEG | T14 | H09 | 0 | 0 | kleiner LLOQ | #VALUE! | 286 | #VALUE! |
| Blank no PEG | T14 | H10 | 0 | 0 | kleiner LLOQ | #VALUE! | 287 | #VALUE! |
| Blank no PEG | T14 | H11 | 0 | 0 | kleiner LLOQ | #VALUE! | 288 | #VALUE! |
| Blank no PEG | T14 | H12 | 0 | 0 | kleiner LLOQ | #VALUE! | 289 | #VALUE! |

|       |       |       |       |       |       |       |       |       |       |       |       |
|-------|-------|-------|-------|-------|-------|-------|-------|-------|-------|-------|-------|
| 1.447 | 1.739 |       | 1.170 |       |       |       |       |       | 0.667 | 0.440 | 0.043 |
| 1.447 | 1.332 |       | 1.392 | 0.137 | 0.146 | 0.130 | 0.138 | 0.109 | 0.729 | 0.478 | 0.042 |
| 1.391 | 1.281 |       | 1.311 | 0.204 | 0.184 | 0.184 | 0.198 | 0.201 | 0.743 | 0.474 | 0.043 |
| 0.961 | 0.835 |       | 1.405 | 0.336 | 0.347 | 0.375 | 0.387 | 0.300 | 0.824 | 0.483 | 0.044 |
| 0.445 | 0.441 |       | 1.280 | 1.085 | 1.086 | 1.218 | 1.004 | 0.873 | 0.704 | 0.457 | 0.041 |
| 0.355 | 0.315 |       | 1.332 | 1.768 | 1.925 | 1.753 | 1.739 | 1.606 |       |       | 0.036 |
| 0.223 | 0.188 | 1.666 | 1.499 | 1.632 |       | 0.048 | 0.046 | 0.047 | 0.048 | 0.048 | 0.048 |
| 0.118 | 0.106 | 1.556 | 1.622 | 1.573 |       | 0.047 | 0.054 | 0.051 | 0.051 | 0.052 | 0.051 |

1

|       |       |       |       |       |       |       |       |       |       |       |       |
|-------|-------|-------|-------|-------|-------|-------|-------|-------|-------|-------|-------|
| 1.652 | 1.627 |       | 1.188 | 0.748 | 0.811 | 0.764 | 0.753 | 0.674 | 0.751 | 0.529 | 0.044 |
| 1.443 | 1.372 |       | 1.364 | 0.139 | 0.147 | 0.131 | 0.139 | 0.110 | 0.811 | 0.561 | 0.043 |
| 1.377 | 1.281 |       | 1.284 | 0.206 | 0.189 | 0.184 | 0.200 | 0.202 | 0.821 | 0.560 | 0.044 |
| 0.972 | 0.883 |       | 1.387 | 0.339 | 0.349 | 0.386 | 0.406 | 0.312 | 0.903 | 0.565 | 0.044 |
| 0.484 | 0.474 |       | 1.298 | 1.087 | 1.113 | 1.203 | 1.022 | 0.903 | 0.790 | 0.544 | 0.042 |
| 0.359 | 0.326 |       | 1.308 | 1.622 | 1.622 | 1.630 | 1.625 | 1.550 |       |       | 0.037 |
| 0.228 | 0.199 | 1.527 | 1.373 | 1.462 |       | 0.048 | 0.046 | 0.048 | 0.049 | 0.049 | 0.049 |
| 0.125 | 0.109 | 1.473 | 1.410 | 1.371 |       | 0.048 | 0.054 | 0.052 | 0.052 | 0.052 | 0.051 |

2

|       |       |       |       |       |       |       |       |       |       |       |       |
|-------|-------|-------|-------|-------|-------|-------|-------|-------|-------|-------|-------|
| 1.579 | 1.475 |       | 1.150 | 1.210 | 1.303 | 1.202 | 1.219 | 1.125 | 0.759 | 0.549 | 0.043 |
| 1.357 | 1.303 |       | 1.283 | 0.140 | 0.148 | 0.131 | 0.139 | 0.111 | 0.820 | 0.575 | 0.043 |
| 1.323 | 1.228 |       | 1.227 | 0.206 | 0.188 | 0.184 | 0.198 | 0.201 | 0.824 | 0.579 | 0.043 |
| 0.959 | 0.872 |       | 1.321 | 0.339 | 0.348 | 0.387 | 0.406 | 0.314 | 0.909 | 0.580 | 0.044 |
| 0.483 | 0.473 |       | 1.270 | 1.069 | 1.103 | 1.181 | 1.017 | 0.903 | 0.798 | 0.560 | 0.042 |
| 0.360 | 0.326 |       | 1.270 | 1.497 | 1.448 | 1.496 | 1.494 | 1.449 |       |       | 0.037 |
| 0.228 | 0.199 | 1.374 | 1.262 | 1.314 |       | 0.048 | 0.046 | 0.048 | 0.049 | 0.049 | 0.049 |
| 0.125 | 0.110 | 1.346 | 1.262 | 1.253 |       | 0.048 | 0.054 | 0.052 | 0.052 | 0.052 | 0.051 |

3

|       |       |  |  |       |       |       |       |       |       |       |       |
|-------|-------|--|--|-------|-------|-------|-------|-------|-------|-------|-------|
| 1.511 | 1.369 |  |  | 1.538 | 1.712 | 1.528 | 1.502 | 1.425 |       |       | 0.043 |
| 1.296 | 1.261 |  |  |       |       |       |       |       |       |       | 0.043 |
| 1.272 | 1.193 |  |  |       |       |       |       |       |       |       | 0.043 |
| 0.947 | 0.859 |  |  |       |       |       |       |       |       |       | 0.044 |
| 0.481 | 0.471 |  |  |       |       |       |       |       |       |       | 0.042 |
| 0.361 | 0.325 |  |  |       |       |       |       |       |       |       | 0.037 |
| 0.229 | 0.199 |  |  |       |       | 0.048 | 0.046 | 0.048 | 0.049 | 0.049 | 0.049 |
| 0.125 | 0.110 |  |  |       |       | 0.047 | 0.054 | 0.052 | 0.052 | 0.052 | 0.051 |

4

|       |       |       |       |       |       |       |       |       |       |       |       |
|-------|-------|-------|-------|-------|-------|-------|-------|-------|-------|-------|-------|
| 1.493 | 1.317 | 1.678 | 1.110 | 1.621 | 1.807 | 1.618 | 1.584 | 1.508 | 0.765 | 0.597 | 0.043 |
| 1.259 | 1.238 | 1.850 | 1.197 | 0.139 | 0.150 | 0.132 | 0.139 | 0.111 | 0.821 | 0.588 | 0.043 |
| 1.248 | 1.175 | 1.816 | 1.153 | 0.204 | 0.188 | 0.184 | 0.197 | 0.199 | 0.831 | 0.599 | 0.044 |
| 0.943 | 0.859 | 1.970 | 1.231 | 0.338 | 0.357 | 0.386 | 0.406 | 0.316 | 0.916 | 0.595 | 0.044 |
| 0.480 | 0.470 | 2.220 | 1.220 | 1.054 | 1.088 | 1.154 | 1.006 | 0.902 | 0.805 | 0.579 | 0.042 |
| 0.359 | 0.325 | 2.149 | 1.211 | 1.395 | 1.324 | 1.348 | 1.345 | 1.317 | 0.037 | 0.037 | 0.037 |
| 0.228 | 0.199 | 1.240 | 1.151 | 1.183 | 0.034 | 0.049 | 0.046 | 0.048 | 0.049 | 0.049 | 0.049 |
| 0.125 | 0.110 | 1.223 | 1.132 | 1.146 | 0.038 | 0.048 | 0.054 | 0.052 | 0.052 | 0.052 | 0.051 |

5

|       |       |  |       |       |       |       |       |       |       |       |       |
|-------|-------|--|-------|-------|-------|-------|-------|-------|-------|-------|-------|
| 1.434 | 1.258 |  | 1.090 | 1.648 | 1.876 | 1.649 | 1.627 | 1.535 |       |       |       |
| 1.217 | 1.201 |  | 1.149 |       |       |       |       |       |       |       |       |
| 1.205 | 1.143 |  | 1.109 |       |       |       |       |       |       |       |       |
| 0.935 | 0.845 |  | 1.182 |       |       |       |       |       |       |       |       |
| 0.477 | 0.469 |  | 1.181 |       |       |       |       |       |       |       |       |
| 0.360 | 0.323 |  | 1.167 |       |       |       |       |       |       |       |       |
| 0.229 | 0.200 |  |       |       |       | 0.049 | 0.047 | 0.048 | 0.049 | 0.049 | 0.049 |
| 0.125 | 0.110 |  |       |       |       | 0.048 | 0.054 | 0.052 | 0.052 | 0.052 | 0.051 |

6

|       |       |       |       |       |       |       |       |       |       |       |       |
|-------|-------|-------|-------|-------|-------|-------|-------|-------|-------|-------|-------|
| 1.013 | 0.810 |       | 0.668 | 0.808 | 0.940 | 0.720 | 0.798 | 0.687 | 0.904 | 0.845 | 0.043 |
| 0.709 | 0.827 |       | 0.703 | 0.142 | 0.156 | 0.136 | 0.137 | 0.116 | 0.990 | 0.846 | 0.042 |
| 0.682 | 0.692 |       | 0.680 | 0.197 | 0.188 | 0.190 | 0.191 | 0.184 | 1.023 | 0.861 | 0.043 |
| 0.507 | 0.519 |       | 0.740 | 0.316 | 0.264 | 0.364 | 0.377 | 0.312 | 1.111 | 0.870 | 0.043 |
| 0.394 | 0.406 |       | 0.682 | 0.580 | 0.561 | 0.600 | 0.529 | 0.563 | 0.962 | 0.834 | 0.042 |
| 0.333 | 0.322 |       | 0.661 | 0.995 | 0.930 | 0.848 | 0.832 | 0.797 | 0.037 | 0.037 | 0.037 |
| 0.229 | 0.201 | 0.843 | 0.679 | 0.732 |       | 0.048 | 0.046 | 0.047 |       |       | 0.047 |
| 0.124 | 0.111 | 0.773 | 0.682 | 0.701 |       | 0.047 | 0.053 | 0.051 | 0.051 | 0.052 | 0.051 |

7

skin cultivation

|  |  |  |  |       |       |       |       |       |       |       |       |          |
|--|--|--|--|-------|-------|-------|-------|-------|-------|-------|-------|----------|
|  |  |  |  | 0.742 | 0.708 | 0.415 | 0.444 | 0.158 | 0.154 | 0.055 | 0.055 | T8/T9 hd |
|  |  |  |  | 0.063 | 0.064 | 0.221 | 0.273 | 0.109 | 0.217 | 0.074 | 0.061 |          |
|  |  |  |  | 0.346 | 0.348 | 0.086 | 0.090 | 0.202 | 0.149 | 0.061 | 0.054 |          |
|  |  |  |  | 0.692 | 0.579 | 0.503 | 0.503 | 0.249 | 0.260 | 0.146 | 0.144 |          |
|  |  |  |  | 0.037 | 0.159 | 0.164 | 0.211 | 0.209 | 0.141 | 0.109 | 0.251 |          |
|  |  |  |  | 0.255 | 0.243 | 0.076 | 0.078 | 0.233 | 0.242 | 0.387 | 0.318 |          |
|  |  |  |  |       |       | 0.050 | 0.043 | 0.047 | 0.050 | 0.049 | 0.047 |          |
|  |  |  |  |       |       | 0.042 | 0.045 | 0.041 | 0.040 | 0.040 | 0.047 |          |

|       |       |       |       |       |       |       |       |       |       |       |       |             |
|-------|-------|-------|-------|-------|-------|-------|-------|-------|-------|-------|-------|-------------|
| 0.038 | 0.038 | 0.037 | 0.038 | 1.321 | 1.278 | 0.836 | 0.885 | 0.345 | 0.335 | 0.073 | 0.072 | T8/T9 hd WH |
| 0.038 | 0.037 | 0.037 | 0.037 | 0.099 | 0.101 | 0.502 | 0.625 | 0.243 | 0.531 | 0.108 | 0.094 |             |
| 0.037 | 0.035 | 0.037 | 0.037 | 0.778 | 0.793 | 0.161 | 0.171 | 0.445 | 0.336 | 0.078 | 0.064 |             |
| 0.037 | 0.036 | 0.037 | 0.037 | 1.502 | 1.288 | 1.112 | 1.116 | 0.578 | 0.591 | 0.319 | 0.299 |             |
| 0.038 | 0.037 | 0.036 | 0.037 | 0.037 | 0.368 | 0.380 | 0.506 | 0.502 | 0.327 | 0.225 | 0.621 |             |
| 0.036 | 0.037 | 0.034 | 0.037 | 0.587 | 0.567 | 0.132 | 0.135 | 0.535 | 0.553 | 0.904 | 0.800 |             |
| 0.037 | 0.037 | 0.037 | 0.037 | 0.036 | 0.037 | 0.053 | 0.045 | 0.045 | 0.056 | 0.054 | 0.053 |             |
| 0.037 | 0.037 | 0.035 | 0.038 | 0.033 | 0.037 | 0.042 | 0.053 | 0.044 | 0.040 | 0.043 | 0.052 |             |

|  |  |  |  |       |       |       |       |       |       |       |       |            |
|--|--|--|--|-------|-------|-------|-------|-------|-------|-------|-------|------------|
|  |  |  |  | 0.598 | 0.575 | 0.524 | 0.523 | 0.235 | 0.225 | 0.117 | 0.106 | T10/T11 hd |
|  |  |  |  | 0.115 | 0.109 | 0.177 | 0.191 | 0.110 | 0.109 | 0.098 | 0.090 |            |
|  |  |  |  | 0.149 | 0.152 | 0.190 | 0.196 | 0.211 | 0.205 | 0.070 | 0.078 |            |
|  |  |  |  | 0.648 | 0.647 | 0.729 | 0.693 | 0.275 | 0.219 | 0.151 | 0.153 |            |
|  |  |  |  | 0.101 | 0.096 | 0.178 | 0.181 | 0.092 | 0.087 | 0.089 | 0.092 |            |
|  |  |  |  | 0.252 | 0.256 | 0.176 | 0.176 | 0.223 | 0.221 | 0.069 | 0.068 |            |
|  |  |  |  |       |       | 0.044 | 0.043 | 0.046 | 0.047 | 0.044 | 0.044 |            |
|  |  |  |  |       |       | 0.041 | 0.041 | 0.042 | 0.042 | 0.041 | 0.042 |            |

|  |  |  |  |       |       |       |       |       |       |       |       |            |
|--|--|--|--|-------|-------|-------|-------|-------|-------|-------|-------|------------|
|  |  |  |  | 0.670 | 0.663 | 0.524 | 0.538 | 0.187 | 0.184 | 0.111 | 0.107 | T12/T13 hd |
|  |  |  |  | 0.065 | 0.066 | 0.111 | 0.113 | 0.070 | 0.069 | 0.061 | 0.062 |            |
|  |  |  |  | 0.180 | 0.181 | 0.102 | 0.104 | 0.171 | 0.172 | 0.061 | 0.062 |            |
|  |  |  |  | 0.678 | 0.577 | 0.479 | 0.502 | 0.148 | 0.165 | 0.137 | 0.129 |            |
|  |  |  |  | 0.067 | 0.068 | 0.095 | 0.107 | 0.064 | 0.065 | 0.090 | 0.099 |            |
|  |  |  |  | 0.255 | 0.263 | 0.081 | 0.085 | 0.255 | 0.249 | 0.077 | 0.075 |            |
|  |  |  |  |       |       | 0.044 | 0.042 | 0.043 | 0.042 | 0.045 | 0.042 |            |
|  |  |  |  |       |       | 0.041 | 0.040 | 0.041 | 0.042 | 0.042 | 0.042 |            |

|  |  |  |  |       |       |       |       |       |       |       |       |        |
|--|--|--|--|-------|-------|-------|-------|-------|-------|-------|-------|--------|
|  |  |  |  | 0.736 | 0.721 | 0.619 | 0.625 | 0.122 | 0.123 | 0.140 | 0.139 | T14 hd |
|  |  |  |  | 0.064 | 0.066 | 0.066 | 0.067 | 0.096 | 0.100 | 0.099 | 0.098 |        |
|  |  |  |  | 0.062 | 0.063 | 0.074 | 0.076 | 0.240 | 0.247 | 0.093 | 0.090 |        |
|  |  |  |  |       |       |       |       |       |       |       |       |        |
|  |  |  |  |       |       |       |       |       |       |       |       |        |
|  |  |  |  |       |       | 0.044 | 0.043 | 0.044 | 0.048 | 0.046 | 0.043 |        |
|  |  |  |  |       |       | 0.042 | 0.044 | 0.041 | 0.042 | 0.045 | 0.044 |        |





|                    |              |                              |                         |                            |                              |
|--------------------|--------------|------------------------------|-------------------------|----------------------------|------------------------------|
| Project number     | F-120        | Apparatus                    | Wallac Victor           | Operator                   | IsBa                         |
| GLP Study (Number) | n.a.         | Protocol (instrument method) | LDH test 2016           | Date of preparation        | 19-04-18                     |
| hot substance      | isotope      | n.a.                         | File name (results)     | IsBa_180419/20_LDH_full_v2 | Date of measurement          |
|                    | name         | n.a.                         | Kind of well plate      | 96 well                    | shaking time [min]           |
|                    | ACB-ID       | n.a.                         | sample volume [µL]      | 100                        | stirring rate (Target) [rpm] |
| cold substance     | Batch number | n.a.                         | Cocktail volume [µL]    | 175                        | Kind of measurement          |
|                    | name         | LDH                          | ACB-ID of cocktail      |                            | Wave length [nm]             |
|                    | ACB-ID       | L23982R                      | Matrix                  | DMEM (from powder)+PEG     | Remarks                      |
| n.a.               | Batch number | SLBK6345V                    | Blank description       | DMEM/PEG, H2O              | Remarks                      |
| n.a.               | n.a.         | n.a.                         | Pipettes (No. / volume) | 50-200µl                   | Remarks                      |
| n.a.               | n.a.         | n.a.                         | Pipettes (No. / volume) | n.a.                       | Remarks                      |

Messdaten (diese Tabelle in Bericht übernehmen)

| Sample name * | concentration (theor.) * | measured data | measured data | mean measured | SD    | RSD   | Blank * | measured data after * Blank subtraction | concentration (calc.) * | Deviation * | Residuen |
|---------------|--------------------------|---------------|---------------|---------------|-------|-------|---------|-----------------------------------------|-------------------------|-------------|----------|
|               | [µg/mL]                  | [AU]          | [AU]          | [AU]          | [AU]  | [%]   | [AU]    |                                         | [µg/mL]                 | [%]         |          |
| KLP1          |                          |               |               |               |       |       | 0.047   |                                         |                         |             |          |
| KLP2          |                          |               |               |               |       |       | 0.054   |                                         |                         |             |          |
| KLP3          |                          |               |               |               |       |       | 0.051   |                                         |                         |             |          |
| KLP4          | 0.041                    | 0.959         | 0.972         | 0.883         | 0.938 | 0.04  | 4.19    | 0.051                                   | 0.887                   | 0.041       | -0.57    |
| KLP5          | 0.018                    | 0.483         | 0.484         | 0.474         | 0.480 | 0.00  | 0.98    | 0.052                                   | 0.429                   | 0.019       | 2.42     |
| KLP6          | 0.012                    | 0.360         | 0.359         | 0.326         | 0.348 | 0.02  | 4.54    | 0.051                                   | 0.297                   | 0.013       | 5.00     |
| KLP7          | 0.007                    | 0.228         | 0.228         | 0.199         | 0.218 | 0.014 | 6.35    |                                         | 0.168                   | 0.006       | -11.29   |
| KLP8          |                          |               |               |               |       |       |         |                                         |                         |             |          |

Statistical data

|                                              |                                          |                     |              |
|----------------------------------------------|------------------------------------------|---------------------|--------------|
| Geradensteigung                              | Slope                                    | m                   | 21.03        |
| Y-Achsenabschnitt                            | Y-Intercept                              | b                   | 0.03         |
| Standardabw. Geradensteigung                 | SD-Slope                                 | S <sub>m</sub>      | 0.648055501  |
| Standardabw. Achsenabschnittes               | SD-Y-Intercept                           | S <sub>b</sub>      | 0.015177452  |
| Anzahl Messpunkte                            | number of measuring points               | n                   | 4            |
| Quadratsumme                                 | sum of squares                           | Q <sub>xx</sub>     | 0.000664046  |
| Bereichsmittle                               |                                          |                     | 0.019557193  |
| Freiheitsgrade                               | degree of freedom                        | f                   | 2            |
| Student-t-Faktor für (P = 95 %; f = n-2)     | Student-t-factor for (P = 95 %; f = n-2) | t                   | 4.303        |
| Vertrauensbereich Steig. (95 %) Obergrenze   |                                          | m + VB <sub>m</sub> | 23.81763508  |
| Vertrauensbereich Steig. (95 %) Untergrenze  |                                          | m - VB <sub>m</sub> | 18.24046944  |
| Vertrauensbereich Achsenabschnitt (95 %) Og. |                                          | b + VB <sub>b</sub> | 0.099335829  |
| Vertrauensbereich Achsenabschnitt (95 %) Ug. |                                          | b - VB <sub>b</sub> | -0.031281327 |
| Korrelationskoeffizient                      | correlation coefficient                  | r                   | 0.9991       |
| Bestimmtheitsmaß                             | determination coefficient                | r <sup>2</sup>      | 0.9981       |
| Reststandardabweichung                       |                                          | S <sub>0</sub>      | 0.01669983   |
| Summe Restquadrate                           |                                          | sd                  | 0.657385838  |
| Verfahrensstandardabw.                       |                                          | S <sub>00</sub>     | 0.000794131  |
| Rel. Verfahrensstandardabw. %                |                                          | V <sub>00</sub>     | 4.060559029  |

Berichten

|                          |       |
|--------------------------|-------|
| mean Blank               | 0     |
| SD Blank                 | 0.00  |
| RSD Blank                | 3.79  |
| x <sup>2</sup> SD (LLOQ) | 0.01  |
| x <sup>2</sup> SD (LOD)  | 0.01  |
| LLOQ (AU)                | 0.061 |
| LOD (AU)                 | 0.067 |
| ULOQ                     | 0.887 |
| LLOQ (Lin)               | 0.168 |

Evaluation / Comment

LDH linearity valid with 7 standards, split in lin high and lin low, each with 4 standards and KLP4 common standard for both. R<sup>2</sup> 0,9981, deviations for both between -13.34% and +13.04%

Date Operator Date Operator Control

Figure 1 Linearity



Figure 2 Method validation Residuen Plot



Evaluation / Comment

lin passed

Date

Operator

Date

Control



| Sample name | Plate | Position | [AU]  | [AU]-Blank | Rating         | [µg/mL] | Dilution factor | [µg/mL] |
|-------------|-------|----------|-------|------------|----------------|---------|-----------------|---------|
| 0           |       | 0 A01    | 0     |            | 0 kleiner LLOQ | #VALUE! | 1               | #VALUE! |
| 0           |       | 0 A02    | 0     |            | 0 kleiner LLOQ | #VALUE! | 1               | #VALUE! |
| 0           |       | 0 A03    | 0     |            | 0 kleiner LLOQ | #VALUE! | 1               | #VALUE! |
| 0           |       | 0 A04    | 0     |            | 0 kleiner LLOQ | #VALUE! | 1               | #VALUE! |
| 0           |       | 0 A05    | 0     |            | 0 kleiner LLOQ | #VALUE! | 1               | #VALUE! |
| 0           |       | 0 A06    | 0     |            | 0 kleiner LLOQ | #VALUE! | 1               | #VALUE! |
| 0           |       | 0 A07    | 0     |            | 0 kleiner LLOQ | #VALUE! | 1               | #VALUE! |
| 0           |       | 0 A08    | 0     |            | 0 kleiner LLOQ | #VALUE! | 1               | #VALUE! |
| 0           |       | 0 A09    | 0     |            | 0 kleiner LLOQ | #VALUE! | 1               | #VALUE! |
| 0           |       | 0 A10    | 0     |            | 0 kleiner LLOQ | #VALUE! | 1               | #VALUE! |
| 0           |       | 0 A11    | 0     |            | 0 kleiner LLOQ | #VALUE! | 1               | #VALUE! |
| 0           |       | 0 A12    | 0     |            | 0 kleiner LLOQ | #VALUE! | 1               | #VALUE! |
| 0           |       | 0 B01    | 0     |            | 0 kleiner LLOQ | #VALUE! | 1               | #VALUE! |
| pos.sui.d1  |       | 0 B02    | 0.897 | 0.846      | 0.846          | 0.039   | 13.75           | 0.531   |
| pos.sui.d1  |       | 0 B03    | 0.909 | 0.858      | 0.858          | 0.039   | 13.75           | 0.539   |
| pos.sui.d1  |       | 0 B04    | 0.928 | 0.877      | 0.877          | 0.040   | 13.75           | 0.551   |
| neg.sui.d1  |       | 0 B05    | 0.088 | 0.037      | kleiner LLOQ   | #VALUE! | 13.75           | #VALUE! |
| neg.sui.d1  |       | 0 B06    | 0.089 | 0.038      | kleiner LLOQ   | #VALUE! | 13.75           | #VALUE! |
| neg.sui.d1  |       | 0 B07    | 0.087 | 0.036      | kleiner LLOQ   | #VALUE! | 13.75           | #VALUE! |
| 0           |       | 0 B08    | 0     |            | 0 kleiner LLOQ | #VALUE! | 1               | #VALUE! |
| 0           |       | 0 B09    | 0     |            | 0 kleiner LLOQ | #VALUE! | 1               | #VALUE! |
| 0           |       | 0 B10    | 0     |            | 0 kleiner LLOQ | #VALUE! | 1               | #VALUE! |
| 0           |       | 0 B11    | 0     |            | 0 kleiner LLOQ | #VALUE! | 1               | #VALUE! |
| 0           |       | 0 B12    | 0     |            | 0 kleiner LLOQ | #VALUE! | 1               | #VALUE! |
| 0           |       | 0 C01    | 0     |            | 0 kleiner LLOQ | #VALUE! | 1               | #VALUE! |
| 0           |       | 0 C02    | 0     |            | 0 kleiner LLOQ | #VALUE! | 1               | #VALUE! |
| 0           |       | 0 C03    | 0     |            | 0 kleiner LLOQ | #VALUE! | 1               | #VALUE! |
| 0           |       | 0 C04    | 0     |            | 0 kleiner LLOQ | #VALUE! | 1               | #VALUE! |
| 0           |       | 0 C05    | 0     |            | 0 kleiner LLOQ | #VALUE! | 1               | #VALUE! |
| 0           |       | 0 C06    | 0     |            | 0 kleiner LLOQ | #VALUE! | 1               | #VALUE! |
| 0           |       | 0 C07    | 0     |            | 0 kleiner LLOQ | #VALUE! | 1               | #VALUE! |
| 0           |       | 0 C08    | 0     |            | 0 kleiner LLOQ | #VALUE! | 1               | #VALUE! |
| 0           |       | 0 C09    | 0     |            | 0 kleiner LLOQ | #VALUE! | 1               | #VALUE! |
| 0           |       | 0 C10    | 0     |            | 0 kleiner LLOQ | #VALUE! | 1               | #VALUE! |
| 0           |       | 0 C11    | 0     |            | 0 kleiner LLOQ | #VALUE! | 1               | #VALUE! |
| 0           |       | 0 C12    | 0     |            | 0 kleiner LLOQ | #VALUE! | 1               | #VALUE! |
| 0           |       | 0 D01    | 0     |            | 0 kleiner LLOQ | #VALUE! | 1               | #VALUE! |
| 0           |       | 0 D02    | 0     |            | 0 kleiner LLOQ | #VALUE! | 1               | #VALUE! |
| 0           |       | 0 D03    | 0     |            | 0 kleiner LLOQ | #VALUE! | 1               | #VALUE! |
| 0           |       | 0 D04    | 0     |            | 0 kleiner LLOQ | #VALUE! | 1               | #VALUE! |
| 0           |       | 0 D05    | 0     |            | 0 kleiner LLOQ | #VALUE! | 1               | #VALUE! |
| 0           |       | 0 D06    | 0     |            | 0 kleiner LLOQ | #VALUE! | 1               | #VALUE! |
| 0           |       | 0 D07    | 0     |            | 0 kleiner LLOQ | #VALUE! | 1               | #VALUE! |
| 0           |       | 0 D08    | 0     |            | 0 kleiner LLOQ | #VALUE! | 1               | #VALUE! |
| 0           |       | 0 D09    | 0     |            | 0 kleiner LLOQ | #VALUE! | 1               | #VALUE! |
| 0           |       | 0 D10    | 0     |            | 0 kleiner LLOQ | #VALUE! | 1               | #VALUE! |
| 0           |       | 0 D11    | 0     |            | 0 kleiner LLOQ | #VALUE! | 1               | #VALUE! |
| 0           |       | 0 D12    | 0     |            | 0 kleiner LLOQ | #VALUE! | 1               | #VALUE! |

Plate:

| Test | Test | Test  | Test  | Test  | Test  | Test  | Test  | Test  | Test  | Test  | Test  | Test  | Test  | Test  | Test  |
|------|------|-------|-------|-------|-------|-------|-------|-------|-------|-------|-------|-------|-------|-------|-------|
|      | 1    | 2     | 3     | 4     | 5     | 6     | 7     | 8     | 9     | 10    | 11    | 12    |       |       |       |
| A    |      |       |       |       |       |       |       |       |       |       |       |       |       |       |       |
| B    |      | 0.897 | 0.909 | 0.928 | 0.088 | 0.089 | 0.087 |       |       |       |       |       |       |       |       |
| C    |      |       |       |       |       |       |       |       |       |       |       |       |       |       |       |
| D    |      |       |       |       |       |       |       |       |       |       |       |       |       |       |       |
| E    |      |       |       |       | 0.077 | 0.076 | 0.073 |       |       |       |       |       |       |       |       |
| F    |      |       |       |       | 0.117 | 0.116 | 0.115 |       |       |       |       |       |       |       |       |
| G    |      |       |       |       |       | 0.045 | 0.047 | 0.049 | 0.050 | 0.048 | 0.050 | 0.048 | 0.047 | 0.049 | 0.049 |
| H    |      |       |       |       |       |       | 0.048 | 0.046 | 0.050 | 0.048 | 0.047 | 0.049 | 0.048 | 0.047 | 0.049 |

| Plattenbelegung | 1 | 2          | 3          | 4          | 5          | 6          | 7          | 8            | 9            | 10           | 11           | 12           |
|-----------------|---|------------|------------|------------|------------|------------|------------|--------------|--------------|--------------|--------------|--------------|
| A               |   |            |            |            |            |            |            |              |              |              |              |              |
| B               |   | pos.sui.d1 | pos.sui.d1 | pos.sui.d1 | neg.sui.d1 | neg.sui.d1 | neg.sui.d1 |              |              |              |              |              |
| C               |   |            |            |            |            |            |            |              |              |              |              |              |
| D               |   |            |            |            |            |            |            |              |              |              |              |              |
| E               |   | pos.hum.d2 | pos.hum.d2 | pos.hum.d2 | neg.hum.d2 | neg.hum.d2 | neg.hum.d2 |              |              |              |              |              |
| F               |   | pos.hd.d2  | pos.hd.d2  | pos.hd.d2  | neg.hd.d2  | neg.hd.d2  |            |              |              |              |              |              |
| G               |   |            |            |            |            |            |            | Blank PEG    | Blank PEG    | Blank PEG    | Blank PEG    | Blank PEG    |
| H               |   |            |            |            |            |            |            | Blank no PEG | Blank no PEG | Blank no PEG | Blank no PEG | Blank no PEG |

Samples aufgeteilt in lin high und low; höher konzentrierte Samples bei lin high zu finden.

d1=dil. 5\*dil2, 75=dil. 13,75  
d2=dil. 30\*dil 2, 75=dil. 82,5

Comment:

Date \_\_\_\_\_ Operator \_\_\_\_\_

Date \_\_\_\_\_ Control \_\_\_\_\_

|              |   |     |       |         |              |         |      |         |
|--------------|---|-----|-------|---------|--------------|---------|------|---------|
| 0            | 0 | E01 | 0     | 0       | kleiner LLOQ | #VALUE! | 1    | #VALUE! |
| pos.hum.d2   | 0 | E02 | 0     | 0       | kleiner LLOQ | #VALUE! | 82.5 | #VALUE! |
| pos.hum.d2   | 0 | E03 | 0     | 0       | kleiner LLOQ | #VALUE! | 82.5 | #VALUE! |
| pos.hum.d2   | 0 | E04 | 0     | 0       | kleiner LLOQ | #VALUE! | 82.5 | #VALUE! |
| neg.hum.d2   | 0 | E05 | 0.077 | 0.026   | kleiner LLOQ | #VALUE! | 82.5 | #VALUE! |
| neg.hum.d2   | 0 | E06 | 0.076 | 0.025   | kleiner LLOQ | #VALUE! | 82.5 | #VALUE! |
| neg.hum.d2   | 0 | E07 | 0.073 | 0.022   | kleiner LLOQ | #VALUE! | 82.5 | #VALUE! |
| 0            | 0 | E08 | 0     | 0       | kleiner LLOQ | #VALUE! | 1    | #VALUE! |
| 0            | 0 | E09 | 0     | 0       | kleiner LLOQ | #VALUE! | 1    | #VALUE! |
| 0            | 0 | E10 | 0     | 0       | kleiner LLOQ | #VALUE! | 1    | #VALUE! |
| 0            | 0 | E11 | 0     | 0       | kleiner LLOQ | #VALUE! | 1    | #VALUE! |
| 0            | 0 | E12 |       | #VALUE! | #VALUE!      | #VALUE! | 1    | #VALUE! |
| 0            | 0 | F01 | 0     | 0       | kleiner LLOQ | #VALUE! | 1    | #VALUE! |
| pos.hd.d2    | 0 | F02 | 0     | 0       | kleiner LLOQ | #VALUE! | 82.5 | #VALUE! |
| pos.hd.d2    | 0 | F03 | 0     | 0       | kleiner LLOQ | #VALUE! | 82.5 | #VALUE! |
| pos.hd.d2    | 0 | F04 | 0     | 0       | kleiner LLOQ | #VALUE! | 82.5 | #VALUE! |
| neg.hd.d2    | 0 | F05 | 0.117 | 0.067   | kleiner LLOQ | #VALUE! | 82.5 | #VALUE! |
| neg.hd.d2    | 0 | F06 | 0.116 | 0.065   | kleiner LLOQ | #VALUE! | 82.5 | #VALUE! |
| neg.hd.d2    | 0 | F07 | 0.115 | 0.064   | kleiner LLOQ | #VALUE! | 82.5 | #VALUE! |
| 0            | 0 | F08 | 0     | 0       | kleiner LLOQ | #VALUE! | 1    | #VALUE! |
| 0            | 0 | F09 | 0     | 0       | kleiner LLOQ | #VALUE! | 1    | #VALUE! |
| 0            | 0 | F10 | 0     | 0       | kleiner LLOQ | #VALUE! | 1    | #VALUE! |
| 0            | 0 | F11 | 0     | 0       | kleiner LLOQ | #VALUE! | 1    | #VALUE! |
| 0            | 0 | F12 |       | #VALUE! | #VALUE!      | #VALUE! | 1    | #VALUE! |
| 0            | 0 | G01 | 0     | 0       | kleiner LLOQ | #VALUE! | 1    | #VALUE! |
| 0            | 0 | G02 | 0     | 0       | kleiner LLOQ | #VALUE! | 1    | #VALUE! |
| 0            | 0 | G03 | 0     | 0       | kleiner LLOQ | #VALUE! | 1    | #VALUE! |
| 0            | 0 | G04 | 0     | 0       | kleiner LLOQ | #VALUE! | 1    | #VALUE! |
| 0            | 0 | G05 | 0     | 0       | kleiner LLOQ | #VALUE! | 1    | #VALUE! |
| 0            | 0 | G06 | 0     | 0       | kleiner LLOQ | #VALUE! | 1    | #VALUE! |
| Blank PEG    | 0 | G07 | 0     | 0       | kleiner LLOQ | #VALUE! | 2.75 | #VALUE! |
| Blank PEG    | 0 | G08 | 0     | 0       | kleiner LLOQ | #VALUE! | 2.75 | #VALUE! |
| Blank PEG    | 0 | G09 | 0     | 0       | kleiner LLOQ | #VALUE! | 2.75 | #VALUE! |
| Blank PEG    | 0 | G10 | 0     | 0       | kleiner LLOQ | #VALUE! | 2.75 | #VALUE! |
| Blank PEG    | 0 | G11 | 0     | 0       | kleiner LLOQ | #VALUE! | 2.75 | #VALUE! |
| Blank PEG    | 0 | G12 | 0     | 0       | kleiner LLOQ | #VALUE! | 2.75 | #VALUE! |
| 0            | 0 | H01 | 0     | 0       | kleiner LLOQ | #VALUE! | 1    | #VALUE! |
| 0            | 0 | H02 | 0     | 0       | kleiner LLOQ | #VALUE! | 1    | #VALUE! |
| 0            | 0 | H03 | 0     | 0       | kleiner LLOQ | #VALUE! | 1    | #VALUE! |
| 0            | 0 | H04 | 0     | 0       | kleiner LLOQ | #VALUE! | 1    | #VALUE! |
| 0            | 0 | H05 | 0     | 0       | kleiner LLOQ | #VALUE! | 1    | #VALUE! |
| 0            | 0 | H06 | 0     | 0       | kleiner LLOQ | #VALUE! | 1    | #VALUE! |
| Blank no PEG | 0 | H07 | 0     | 0       | kleiner LLOQ | #VALUE! | 2.75 | #VALUE! |
| Blank no PEG | 0 | H08 | 0     | 0       | kleiner LLOQ | #VALUE! | 2.75 | #VALUE! |
| Blank no PEG | 0 | H09 | 0     | 0       | kleiner LLOQ | #VALUE! | 2.75 | #VALUE! |
| Blank no PEG | 0 | H10 | 0     | 0       | kleiner LLOQ | #VALUE! | 2.75 | #VALUE! |
| Blank no PEG | 0 | H11 | 0     | 0       | kleiner LLOQ | #VALUE! | 2.75 | #VALUE! |
| Blank no PEG | 0 | H12 | 0     | 0       | kleiner LLOQ | #VALUE! | 2.75 | #VALUE! |

|   |     |       |              |              |         |         |         |
|---|-----|-------|--------------|--------------|---------|---------|---------|
| 0 | A01 | 0     | kleiner LLOQ | #VALUE!      | 1       | #VALUE! |         |
| 0 | A02 | 0     | kleiner LLOQ | #VALUE!      | 1       | #VALUE! |         |
| 0 | A03 | 0     | kleiner LLOQ | #VALUE!      | 1       | #VALUE! |         |
| 0 | A04 | 0     | kleiner LLOQ | #VALUE!      | 1       | #VALUE! |         |
| 0 | A05 | 0     | kleiner LLOQ | #VALUE!      | 1       | #VALUE! |         |
| 0 | A06 | 0     | kleiner LLOQ | #VALUE!      | 1       | #VALUE! |         |
| 0 | A07 | 0     | kleiner LLOQ | #VALUE!      | 1       | #VALUE! |         |
| 0 | A08 | 0     | kleiner LLOQ | #VALUE!      | 1       | #VALUE! |         |
| 0 | A09 | 0     | kleiner LLOQ | #VALUE!      | 1       | #VALUE! |         |
| 0 | A10 | 0     | kleiner LLOQ | #VALUE!      | 1       | #VALUE! |         |
| 0 | A11 | 0     | kleiner LLOQ | #VALUE!      | 1       | #VALUE! |         |
| 0 | A12 | 0     | kleiner LLOQ | #VALUE!      | 1       | #VALUE! |         |
| 0 | B01 | 0     | kleiner LLOQ | #VALUE!      | 1       | #VALUE! |         |
| 0 | B02 | 0     | kleiner LLOQ | #VALUE!      | 1       | #VALUE! |         |
| 0 | B03 | 0     | kleiner LLOQ | #VALUE!      | 1       | #VALUE! |         |
| 0 | B04 | 0     | kleiner LLOQ | #VALUE!      | 1       | #VALUE! |         |
| 0 | B05 | 0     | kleiner LLOQ | #VALUE!      | 1       | #VALUE! |         |
| 0 | B06 | 0     | kleiner LLOQ | #VALUE!      | 1       | #VALUE! |         |
| 0 | B07 | 0     | kleiner LLOQ | #VALUE!      | 1       | #VALUE! |         |
| 0 | B08 | 0     | kleiner LLOQ | #VALUE!      | 1       | #VALUE! |         |
| 0 | B09 | 0     | kleiner LLOQ | #VALUE!      | 1       | #VALUE! |         |
| 0 | B10 | 0     | kleiner LLOQ | #VALUE!      | 1       | #VALUE! |         |
| 0 | B11 | 0     | kleiner LLOQ | #VALUE!      | 1       | #VALUE! |         |
| 0 | B12 | 0     | kleiner LLOQ | #VALUE!      | 1       | #VALUE! |         |
| 0 | C01 | 0     | kleiner LLOQ | #VALUE!      | 1       | #VALUE! |         |
| 0 | C02 | 0     | kleiner LLOQ | #VALUE!      | 1       | #VALUE! |         |
| 0 | C03 | 0     | kleiner LLOQ | #VALUE!      | 1       | #VALUE! |         |
| 0 | C04 | 0     | kleiner LLOQ | #VALUE!      | 1       | #VALUE! |         |
| 0 | C05 | 0     | kleiner LLOQ | #VALUE!      | 1       | #VALUE! |         |
| 0 | C06 | 0     | kleiner LLOQ | #VALUE!      | 1       | #VALUE! |         |
| 0 | C07 | 0     | kleiner LLOQ | #VALUE!      | 1       | #VALUE! |         |
| 0 | C08 | 0     | kleiner LLOQ | #VALUE!      | 1       | #VALUE! |         |
| 0 | C09 | 0     | kleiner LLOQ | #VALUE!      | 1       | #VALUE! |         |
| 0 | C10 | 0     | kleiner LLOQ | #VALUE!      | 1       | #VALUE! |         |
| 0 | C11 | 0     | kleiner LLOQ | #VALUE!      | 1       | #VALUE! |         |
| 0 | C12 | 0     | kleiner LLOQ | #VALUE!      | 1       | #VALUE! |         |
| 0 | D01 | 0     | kleiner LLOQ | #VALUE!      | 1       | #VALUE! |         |
| 0 | D02 | 0     | kleiner LLOQ | #VALUE!      | 1       | #VALUE! |         |
| 0 | D03 | 0     | kleiner LLOQ | #VALUE!      | 1       | #VALUE! |         |
| 0 | D04 | 0     | kleiner LLOQ | #VALUE!      | 1       | #VALUE! |         |
| 0 | D05 | 0     | kleiner LLOQ | #VALUE!      | 1       | #VALUE! |         |
| 0 | D06 | 0     | kleiner LLOQ | #VALUE!      | 1       | #VALUE! |         |
| 0 | D07 | 0.000 | -0.051       | kleiner LLOQ | #VALUE! | 2.75    | #VALUE! |
| 0 | D08 | 0.000 | -0.051       | kleiner LLOQ | #VALUE! | 2.75    | #VALUE! |
| 0 | D09 | 0.000 | -0.051       | kleiner LLOQ | #VALUE! | 2.75    | #VALUE! |
| 0 | D10 | 0.000 | -0.051       | kleiner LLOQ | #VALUE! | 2.75    | #VALUE! |
| 0 | D11 | 0.000 | -0.051       | kleiner LLOQ | #VALUE! | 2.75    | #VALUE! |
| 0 | D12 | 0.000 | -0.051       | kleiner LLOQ | #VALUE! | 2.75    | #VALUE! |

Plate: 

|  |
|--|
|  |
|--|

|   |   |   |   |   |   |   |   |   |   |    |    |    |
|---|---|---|---|---|---|---|---|---|---|----|----|----|
|   | 1 | 2 | 3 | 4 | 5 | 6 | 7 | 8 | 9 | 10 | 11 | 12 |
| A |   |   |   |   |   |   |   |   |   |    |    |    |
| B |   |   |   |   |   |   |   |   |   |    |    |    |
| C |   |   |   |   |   |   |   |   |   |    |    |    |
| D |   |   |   |   |   |   |   |   |   |    |    |    |
| E |   |   |   |   |   |   |   |   |   |    |    |    |
| F |   |   |   |   |   |   |   |   |   |    |    |    |
| G |   |   |   |   |   |   |   |   |   |    |    |    |
| H |   |   |   |   |   |   |   |   |   |    |    |    |

Plattenbelegung

|   |   |   |   |   |   |   |   |   |   |    |    |    |
|---|---|---|---|---|---|---|---|---|---|----|----|----|
|   | 1 | 2 | 3 | 4 | 5 | 6 | 7 | 8 | 9 | 10 | 11 | 12 |
| A |   |   |   |   |   |   |   |   |   |    |    |    |
| B |   |   |   |   |   |   |   |   |   |    |    |    |
| C |   |   |   |   |   |   |   |   |   |    |    |    |
| D |   |   |   |   |   |   |   |   |   |    |    |    |
| E |   |   |   |   |   |   |   |   |   |    |    |    |
| F |   |   |   |   |   |   |   |   |   |    |    |    |
| G |   |   |   |   |   |   |   |   |   |    |    |    |
| H |   |   |   |   |   |   |   |   |   |    |    |    |

Comment:

Date      Operator \_\_\_\_\_      Date      Control \_\_\_\_\_

|   |     |       |              |              |         |         |         |
|---|-----|-------|--------------|--------------|---------|---------|---------|
| 0 | E01 | 0     | kleiner LLOQ | #VALUE!      | 1       | #VALUE! |         |
| 0 | E02 | 0     | kleiner LLOQ | #VALUE!      | 1       | #VALUE! |         |
| 0 | E03 | 0     | kleiner LLOQ | #VALUE!      | 1       | #VALUE! |         |
| 0 | E04 | 0     | kleiner LLOQ | #VALUE!      | 1       | #VALUE! |         |
| 0 | E05 | 0.000 | -0.051       | kleiner LLOQ | #VALUE! | 2.75    | #VALUE! |
| 0 | E06 | 0.000 | -0.051       | kleiner LLOQ | #VALUE! | 2.75    | #VALUE! |
| 0 | E07 | 0.000 | -0.051       | kleiner LLOQ | #VALUE! | 2.75    | #VALUE! |
| 0 | E08 | 0.000 | -0.051       | kleiner LLOQ | #VALUE! | 2.75    | #VALUE! |
| 0 | E09 | 0.000 | -0.051       | kleiner LLOQ | #VALUE! | 2.75    | #VALUE! |
| 0 | E10 | 0.000 | -0.051       | kleiner LLOQ | #VALUE! | 2.75    | #VALUE! |
| 0 | E11 | 0.000 | -0.051       | kleiner LLOQ | #VALUE! | 2.75    | #VALUE! |
| 0 | E12 | 0.000 | -0.051       | kleiner LLOQ | #VALUE! | 2.75    | #VALUE! |
| 0 | F01 | 0     | kleiner LLOQ | #VALUE!      | 1       | #VALUE! |         |
| 0 | F02 | 0     | kleiner LLOQ | #VALUE!      | 1       | #VALUE! |         |
| 0 | F03 | 0     | kleiner LLOQ | #VALUE!      | 1       | #VALUE! |         |
| 0 | F04 | 0     | kleiner LLOQ | #VALUE!      | 1       | #VALUE! |         |
| 0 | F05 | 0.000 | -0.051       | kleiner LLOQ | #VALUE! | 2.75    | #VALUE! |
| 0 | F06 | 0.000 | -0.051       | kleiner LLOQ | #VALUE! | 2.75    | #VALUE! |
| 0 | F07 | 0.000 | -0.051       | kleiner LLOQ | #VALUE! | 2.75    | #VALUE! |
| 0 | F08 | 0.000 | -0.051       | kleiner LLOQ | #VALUE! | 2.75    | #VALUE! |
| 0 | F09 | 0.000 | -0.051       | kleiner LLOQ | #VALUE! | 2.75    | #VALUE! |
| 0 | F10 | 0.000 | -0.051       | kleiner LLOQ | #VALUE! | 2.75    | #VALUE! |
| 0 | F11 | 0.000 | -0.051       | kleiner LLOQ | #VALUE! | 2.75    | #VALUE! |
| 0 | F12 | 0.000 | -0.051       | kleiner LLOQ | #VALUE! | 2.75    | #VALUE! |
| 0 | G01 | 0     | kleiner LLOQ | #VALUE!      | 1       | #VALUE! |         |
| 0 | G02 | 0     | kleiner LLOQ | #VALUE!      | 1       | #VALUE! |         |
| 0 | G03 | 0     | kleiner LLOQ | #VALUE!      | 1       | #VALUE! |         |
| 0 | G04 | 0     | kleiner LLOQ | #VALUE!      | 1       | #VALUE! |         |
| 0 | G05 | 0     | kleiner LLOQ | #VALUE!      | 1       | #VALUE! |         |
| 0 | G06 | 0     | kleiner LLOQ | #VALUE!      | 1       | #VALUE! |         |
| 0 | G07 | 0     | kleiner LLOQ | #VALUE!      | 2.75    | #VALUE! |         |
| 0 | G08 | 0     | kleiner LLOQ | #VALUE!      | 2.75    | #VALUE! |         |
| 0 | G09 | 0     | kleiner LLOQ | #VALUE!      | 2.75    | #VALUE! |         |
| 0 | G10 | 0     | kleiner LLOQ | #VALUE!      | 2.75    | #VALUE! |         |
| 0 | G11 | 0     | kleiner LLOQ | #VALUE!      | 2.75    | #VALUE! |         |
| 0 | G12 | 0     | kleiner LLOQ | #VALUE!      | 2.75    | #VALUE! |         |
| 0 | H01 | 0     | kleiner LLOQ | #VALUE!      | 1       | #VALUE! |         |
| 0 | H02 | 0     | kleiner LLOQ | #VALUE!      | 1       | #VALUE! |         |
| 0 | H03 | 0     | kleiner LLOQ | #VALUE!      | 1       | #VALUE! |         |
| 0 | H04 | 0     | kleiner LLOQ | #VALUE!      | 1       | #VALUE! |         |
| 0 | H05 | 0     | kleiner LLOQ | #VALUE!      | 1       | #VALUE! |         |
| 0 | H06 | 0     | kleiner LLOQ | #VALUE!      | 1       | #VALUE! |         |
| 0 | H07 | 0     | kleiner LLOQ | #VALUE!      | 2.75    | #VALUE! |         |
| 0 | H08 | 0     | kleiner LLOQ | #VALUE!      | 2.75    | #VALUE! |         |
| 0 | H09 | 0     | kleiner LLOQ | #VALUE!      | 2.75    | #VALUE! |         |
| 0 | H10 | 0     | kleiner LLOQ | #VALUE!      | 2.75    | #VALUE! |         |
| 0 | H11 | 0     | kleiner LLOQ | #VALUE!      | 2.75    | #VALUE! |         |
| 0 | H12 | 0     | kleiner LLOQ | #VALUE!      | 2.75    | #VALUE! |         |
| 0 | A01 | 0     | kleiner LLOQ | #VALUE!      | 1       | #VALUE! |         |
| 0 | A02 | 0     | kleiner LLOQ | #VALUE!      | 1       | #VALUE! |         |
| 0 | A03 | 0     | kleiner LLOQ | #VALUE!      | 1       | #VALUE! |         |
| 0 | A04 | 0     | kleiner LLOQ | #VALUE!      | 1       | #VALUE! |         |
| 0 | A05 | 0     | kleiner LLOQ | #VALUE!      | 1       | #VALUE! |         |
| 0 | A06 | 0     | kleiner LLOQ | #VALUE!      | 1       | #VALUE! |         |
| 0 | A07 | 0     | kleiner LLOQ | #VALUE!      | 1       | #VALUE! |         |
| 0 | A08 | 0     | kleiner LLOQ | #VALUE!      | 1       | #VALUE! |         |
| 0 | A09 | 0     | kleiner LLOQ | #VALUE!      | 1       | #VALUE! |         |
| 0 | A10 | 0     | kleiner LLOQ | #VALUE!      | 1       | #VALUE! |         |
| 0 | A11 | 0     | kleiner LLOQ | #VALUE!      | 1       | #VALUE! |         |
| 0 | A12 | 0     | kleiner LLOQ | #VALUE!      | 1       | #VALUE! |         |
| 0 | B01 | 0     | kleiner LLOQ | #VALUE!      | 1       | #VALUE! |         |
| 0 | B02 | 0     | kleiner LLOQ | #VALUE!      | 1       | #VALUE! |         |
| 0 | B03 | 0     | kleiner LLOQ | #VALUE!      | 1       | #VALUE! |         |
| 0 | B04 | 0     | kleiner LLOQ | #VALUE!      | 1       | #VALUE! |         |
| 0 | B05 | 0     | kleiner LLOQ | #VALUE!      | 1       | #VALUE! |         |
| 0 | B06 | 0     | kleiner LLOQ | #VALUE!      | 1       | #VALUE! |         |
| 0 | B07 | 0     | kleiner LLOQ | #VALUE!      | 1       | #VALUE! |         |
| 0 | B08 | 0     | kleiner LLOQ | #VALUE!      | 1       | #VALUE! |         |
| 0 | B09 | 0     | kleiner LLOQ | #VALUE!      | 1       | #VALUE! |         |
| 0 | B10 | 0     | kleiner LLOQ | #VALUE!      | 1       | #VALUE! |         |
| 0 | B11 | 0     | kleiner LLOQ | #VALUE!      | 1       | #VALUE! |         |
| 0 | B12 | 0     | kleiner LLOQ | #VALUE!      | 1       | #VALUE! |         |
| 0 | C01 | 0     | kleiner LLOQ | #VALUE!      | 1       | #VALUE! |         |

Plate: 

|  |
|--|
|  |
|--|

|   | 1 | 2 | 3 | 4 | 5 | 6 | 7 | 8 | 9 | 10 | 11 | 12 |
|---|---|---|---|---|---|---|---|---|---|----|----|----|
| A |   |   |   |   |   |   |   |   |   |    |    |    |
| B |   |   |   |   |   |   |   |   |   |    |    |    |
| C |   |   |   |   |   |   |   |   |   |    |    |    |
| D |   |   |   |   |   |   |   |   |   |    |    |    |
| E |   |   |   |   |   |   |   |   |   |    |    |    |
| F |   |   |   |   |   |   |   |   |   |    |    |    |
| G |   |   |   |   |   |   |   |   |   |    |    |    |
| H |   |   |   |   |   |   |   |   |   |    |    |    |

Plattenbelegung

|   | 1 | 2 | 3 | 4 | 5 | 6 | 7 | 8 | 9 | 10 | 11 | 12 |
|---|---|---|---|---|---|---|---|---|---|----|----|----|
| A |   |   |   |   |   |   |   |   |   |    |    |    |
| B |   |   |   |   |   |   |   |   |   |    |    |    |
| C |   |   |   |   |   |   |   |   |   |    |    |    |
| D |   |   |   |   |   |   |   |   |   |    |    |    |
| E |   |   |   |   |   |   |   |   |   |    |    |    |



|                    |              |                            |                         |                         |                              |
|--------------------|--------------|----------------------------|-------------------------|-------------------------|------------------------------|
| Project number     | F-120        | Apparatus                  | Wallac Victor           | Operator                | IsBa                         |
| GLP Study (Number) | n.a.         | Protocol (Instrument meth) | LDH test 2016           | Date of preparation     | 19-04-18                     |
| hot substance      | isotope      | n.a.                       | File name (results)     | IsBa_180419/20_LDH_full | Date of measurement          |
|                    | name         | n.a.                       | Kind of well plate      | 96 well                 | shaking time [min]           |
| cold substance     | ACB-ID       | n.a.                       | sample volume [µL]      | 100                     | stirring rate (Target) [rpm] |
|                    | Batch number | n.a.                       | Cocktail volume [µL]    | 175                     | Kind of measurement          |
| n.a.               | name         | LDH                        | ACB-ID of cocktail      |                         | Wave length [nm]             |
|                    | ACB-ID       | L23982R                    | Matrix                  | DMEM (from powder)+PE   | Remarks                      |
| n.a.               | Batch number | SLBK6345V                  | Blank description       | DMEM/PEG, H2O           | Remarks                      |
|                    |              |                            | Pipettes (No. / volume) | 50-200µl                | Remarks                      |
| n.a.               | n.a.         | Pipettes (No. / volume)    | n.a.                    | Remarks                 | n.a.                         |

Messdaten (diese Tabelle in Bericht übernehmen)

| Sample name * | concentration (theor.) * | measured data | measured data | measured data | mean measured | SD   | RSD  | Blank * | measured data after * | concentration (calc.) * | Deviation * | Residuen |
|---------------|--------------------------|---------------|---------------|---------------|---------------|------|------|---------|-----------------------|-------------------------|-------------|----------|
|               | [µg/mL]                  | [AU]          | [AU]          | [AU]          | [AU]          | [AU] | [%]  | [AU]    | Blank subtraction     | [µg/mL]                 | [%]         |          |
| KLP1          | 0.148                    | 1.579         | 1.652         | 1.627         | 1.62          | 0.03 | 1.87 | 0.047   | 1.568                 | 0.148                   | -0.24       | 0.00     |
| KLP2          | 0.114                    | 1.357         | 1.443         | 1.372         | 1.39          | 0.04 | 2.70 | 0.054   | 1.340                 | 0.110                   | -3.40       | 0.00     |
| KLP3          | 0.074                    | 1.272         | 1.193         | 1.228         | 1.23          | 0.03 | 2.63 | 0.051   | 1.180                 | 0.084                   | 13.04       | 0.01     |
| KLP4          | 0.041                    | 0.959         | 0.972         | 0.883         | 0.94          | 0.04 | 4.19 | 0.051   | 0.887                 | 0.035                   | -13.32      | -0.01    |
| KLP5          |                          |               |               |               |               |      |      | 0.052   |                       |                         |             |          |
| KLP6          |                          |               |               |               |               |      |      | 0.051   |                       |                         |             |          |
| KLP7          |                          |               |               |               |               |      |      |         |                       |                         |             |          |
| KLP8          |                          |               |               |               |               |      |      |         |                       |                         |             |          |

Statistical data

|                                              |                                          |                     |             |
|----------------------------------------------|------------------------------------------|---------------------|-------------|
| Geradensteigung                              | Slope                                    | m                   | 6.05        |
| Y-Achsenabschnitt                            | Y-intercept                              | b                   | 0.67        |
| Standardabw. Geradensteigung                 | SD-Slope                                 | S <sub>m</sub>      | 0.620291227 |
| Standardabw. Achsenabschnittes               | SD-Y-Intercept                           | S <sub>b</sub>      | 0.063894294 |
| Anzahl Messpunkte                            | number of measuring points               | n                   | 4           |
| Quadratsumme                                 | sum of squares                           | Q <sub>xx</sub>     | 0.006578604 |
| Bereichsmittle                               |                                          | f                   | 0.094336926 |
| Freiheitsgrade                               | degree of freedom                        | f                   | 2           |
| Student-t-Faktor für (P = 95 %; f = n-2)     | Student-t-factor for (P = 95 %; f = n-2) | t                   | 4.303       |
| Vertrauensbereich Steig. (95 %) Obergrenze   |                                          | m + VB <sub>m</sub> | 8.722319627 |
| Vertrauensbereich Steig. (95 %) Untergrenze  |                                          | m - VB <sub>m</sub> | 3.384093228 |
| Vertrauensbereich Achsenabschnitt (95 %) Og. |                                          | b + VB <sub>b</sub> | 0.946914615 |
| Vertrauensbereich Achsenabschnitt (95 %) Ug. |                                          | b - VB <sub>b</sub> | 0.398761518 |
| Korrelationskoeffizient                      | correlation coefficient                  | r                   | 0.9897      |
| Bestimmtheitsmaß                             | determination coefficient                | r <sup>2</sup>      | 0.9794      |
| Reststandardabweichung                       |                                          | S <sub>0</sub>      | 0.050310948 |
| Summe Restquadrat                            |                                          | sd                  | 2.895683345 |
| Verfahrensstandardabw.                       |                                          | S <sub>0p</sub>     | 0.008311454 |
| Rel. Verfahrensstandardabw. %                |                                          | V <sub>0p</sub>     | 8.810393374 |

|                          |       |
|--------------------------|-------|
| mean Blank               | 0     |
| SD Blank                 | 0.00  |
| RSD Blank                | 3.79  |
| x <sup>2</sup> SD (LLOQ) | 0     |
| x <sup>2</sup> SD (LOD)  | 0     |
| LLOQ (AU)                | 0     |
| LOD (AU)                 | 0     |
| LLOQ                     | 1.568 |
| LLOQ (Lin)               | 0.887 |

Evaluation / Comment

LDH linearity valid with 7 standards, split in lin high and lin low, each with 4 standards and KLP4 common standard for both. R<sup>2</sup> 0,9981, deviations for both between -13.34% and +13.04%

Date

Operator

Date

Control

Figure 1 Linearity



Figure 2 Method validation Residuen Plot



Evaluation / Comment

lin passed

Date

Operator

Date

Control

| Sample name | Plate      | Position | [AU]  | [AU]-Blank | Rating       | [µg/mL] | Dilution factor | [µg/mL] |
|-------------|------------|----------|-------|------------|--------------|---------|-----------------|---------|
| 0           | Kontrollen | A01      | 0     | 0          | kleiner LLOQ | #VALUE! | 1               | #VALUE! |
| 0           | Kontrollen | A02      | 0     | 0          | kleiner LLOQ | #VALUE! | 1               | #VALUE! |
| 0           | Kontrollen | A03      | 0     | 0          | kleiner LLOQ | #VALUE! | 1               | #VALUE! |
| 0           | Kontrollen | A04      | 0     | 0          | kleiner LLOQ | #VALUE! | 1               | #VALUE! |
| 0           | Kontrollen | A05      | 0     | 0          | kleiner LLOQ | #VALUE! | 1               | #VALUE! |
| 0           | Kontrollen | A06      | 0     | 0          | kleiner LLOQ | #VALUE! | 1               | #VALUE! |
| 0           | Kontrollen | A07      | 0     | 0          | kleiner LLOQ | #VALUE! | 1               | #VALUE! |
| 0           | Kontrollen | A08      | 0     | 0          | kleiner LLOQ | #VALUE! | 1               | #VALUE! |
| 0           | Kontrollen | A09      | 0     | 0          | kleiner LLOQ | #VALUE! | 1               | #VALUE! |
| 0           | Kontrollen | A10      | 0     | 0          | kleiner LLOQ | #VALUE! | 1               | #VALUE! |
| 0           | Kontrollen | A11      | 0     | 0          | kleiner LLOQ | #VALUE! | 1               | #VALUE! |
| 0           | Kontrollen | A12      | 0     | 0          | kleiner LLOQ | #VALUE! | 1               | #VALUE! |
| 0           | Kontrollen | B01      | 0     | 0          | kleiner LLOQ | #VALUE! | 1               | #VALUE! |
| pos.sui.d1  | Kontrollen | B02      | 0     | 0          | kleiner LLOQ | #VALUE! | 1               | #VALUE! |
| pos.sui.d1  | Kontrollen | B03      | 0     | 0          | kleiner LLOQ | #VALUE! | 1               | #VALUE! |
| pos.sui.d1  | Kontrollen | B04      | 0     | 0          | kleiner LLOQ | #VALUE! | 1               | #VALUE! |
| neg.sui.d1  | Kontrollen | B05      | 0.000 | -0.051     | kleiner LLOQ | #VALUE! | 13.75           | #VALUE! |
| neg.sui.d1  | Kontrollen | B06      | 0.000 | -0.051     | kleiner LLOQ | #VALUE! | 13.75           | #VALUE! |
| neg.sui.d1  | Kontrollen | B07      | 0.000 | -0.051     | kleiner LLOQ | #VALUE! | 13.75           | #VALUE! |
| 0           | Kontrollen | B08      | 0     | 0          | kleiner LLOQ | #VALUE! | 1               | #VALUE! |
| 0           | Kontrollen | B09      | 0     | 0          | kleiner LLOQ | #VALUE! | 1               | #VALUE! |
| 0           | Kontrollen | B10      | 0     | 0          | kleiner LLOQ | #VALUE! | 1               | #VALUE! |
| 0           | Kontrollen | B11      | 0     | 0          | kleiner LLOQ | #VALUE! | 1               | #VALUE! |
| 0           | Kontrollen | B12      | 0     | 0          | kleiner LLOQ | #VALUE! | 1               | #VALUE! |
| 0           | Kontrollen | C01      | 0     | 0          | kleiner LLOQ | #VALUE! | 1               | #VALUE! |
| 0           | Kontrollen | C02      | 0     | 0          | kleiner LLOQ | #VALUE! | 1               | #VALUE! |
| 0           | Kontrollen | C03      | 0     | 0          | kleiner LLOQ | #VALUE! | 1               | #VALUE! |
| 0           | Kontrollen | C04      | 0     | 0          | kleiner LLOQ | #VALUE! | 1               | #VALUE! |
| 0           | Kontrollen | C05      | 0     | 0          | kleiner LLOQ | #VALUE! | 1               | #VALUE! |
| 0           | Kontrollen | C06      | 0     | 0          | kleiner LLOQ | #VALUE! | 1               | #VALUE! |
| 0           | Kontrollen | C07      | 0     | 0          | kleiner LLOQ | #VALUE! | 1               | #VALUE! |
| 0           | Kontrollen | C08      | 0     | 0          | kleiner LLOQ | #VALUE! | 1               | #VALUE! |
| 0           | Kontrollen | C09      | 0     | 0          | kleiner LLOQ | #VALUE! | 1               | #VALUE! |
| 0           | Kontrollen | C10      | 0     | 0          | kleiner LLOQ | #VALUE! | 1               | #VALUE! |
| 0           | Kontrollen | C11      | 0     | 0          | kleiner LLOQ | #VALUE! | 1               | #VALUE! |
| 0           | Kontrollen | C12      | 0     | 0          | kleiner LLOQ | #VALUE! | 1               | #VALUE! |
| 0           | Kontrollen | D01      | 0     | 0          | kleiner LLOQ | #VALUE! | 1               | #VALUE! |
| 0           | Kontrollen | D02      | 0     | 0          | kleiner LLOQ | #VALUE! | 1               | #VALUE! |
| 0           | Kontrollen | D03      | 0     | 0          | kleiner LLOQ | #VALUE! | 1               | #VALUE! |
| 0           | Kontrollen | D04      | 0     | 0          | kleiner LLOQ | #VALUE! | 1               | #VALUE! |
| 0           | Kontrollen | D05      | 0     | 0          | kleiner LLOQ | #VALUE! | 1               | #VALUE! |
| 0           | Kontrollen | D06      | 0     | 0          | kleiner LLOQ | #VALUE! | 1               | #VALUE! |
| 0           | Kontrollen | D07      | 0     | 0          | kleiner LLOQ | #VALUE! | 1               | #VALUE! |
| 0           | Kontrollen | D08      | 0     | 0          | kleiner LLOQ | #VALUE! | 1               | #VALUE! |
| 0           | Kontrollen | D09      | 0     | 0          | kleiner LLOQ | #VALUE! | 1               | #VALUE! |
| 0           | Kontrollen | D10      | 0     | 0          | kleiner LLOQ | #VALUE! | 1               | #VALUE! |
| 0           | Kontrollen | D11      | 0     | 0          | kleiner LLOQ | #VALUE! | 1               | #VALUE! |
| 0           | Kontrollen | D12      | 0     | 0          | kleiner LLOQ | #VALUE! | 1               | #VALUE! |

Plate: **Kontrollen**

|   | 1 | 2 | 3     | 4     | 5     | 6 | 7     | 8     | 9     | 10    | 11    | 12    |
|---|---|---|-------|-------|-------|---|-------|-------|-------|-------|-------|-------|
| A |   |   |       |       |       |   |       |       |       |       |       |       |
| B |   |   |       |       |       |   |       |       |       |       |       |       |
| C |   |   |       |       |       |   |       |       |       |       |       |       |
| D |   |   |       |       |       |   |       |       |       |       |       |       |
| E |   |   | 1.040 | 1.053 | 1.067 |   |       |       |       |       |       |       |
| F |   |   | 1.334 | 1.265 | 1.290 |   |       |       |       |       |       |       |
| G |   |   |       |       |       |   | 0.045 | 0.047 | 0.049 | 0.050 | 0.048 | 0.050 |
| H |   |   |       |       |       |   | 0.048 | 0.046 | 0.050 | 0.048 | 0.047 | 0.049 |

Plattenbelegung

|   | 1 | 2          | 3          | 4          | 5          | 6          | 7          | 8            | 9            | 10           | 11           | 12           |
|---|---|------------|------------|------------|------------|------------|------------|--------------|--------------|--------------|--------------|--------------|
| A |   |            |            |            |            |            |            |              |              |              |              |              |
| B |   | pos.sui.d1 | pos.sui.d1 | pos.sui.d1 | neg.sui.d1 | neg.sui.d1 | neg.sui.d1 |              |              |              |              |              |
| C |   |            |            |            |            |            |            |              |              |              |              |              |
| D |   |            |            |            |            |            |            |              |              |              |              |              |
| E |   | pos.hum.d2 | pos.hum.d2 | pos.hum.d2 | neg.hum.d2 | neg.hum.d2 | neg.hum.d2 |              |              |              |              |              |
| F |   | pos.hd.d2  | pos.hd.d2  | pos.hd.d2  | neg.hd.d2  | neg.hd.d2  | neg.hd.d2  |              |              |              |              |              |
| G |   |            |            |            |            |            |            | Blank PEG    | Blank PEG    | Blank PEG    | Blank PEG    | Blank PEG    |
| H |   |            |            |            |            |            |            | Blank no PEG | Blank no PEG | Blank no PEG | Blank no PEG | Blank no PEG |

Comment:

Samples aufgeteilt in lin high und low;niedriger konzentrierte Samples bei lin low zu finden.

Date      Operator      Date      Control



|              |            |     |       |         |              |         |      |         |
|--------------|------------|-----|-------|---------|--------------|---------|------|---------|
| 0            | Kontrollen | E01 | 0     | 0       | kleiner LLOQ | #VALUE! | 1    | #VALUE! |
| pos.hum.d2   | Kontrollen | E02 | 1.040 | 0.989   | 0.989        | 0.052   | 82.5 | 4.306   |
| pos.hum.d2   | Kontrollen | E03 | 1.053 | 1.002   | 1.002        | 0.054   | 82.5 | 4.489   |
| pos.hum.d2   | Kontrollen | E04 | 1.067 | 1.016   | 1.016        | 0.057   | 82.5 | 4.682   |
| neg.hum.d2   | Kontrollen | E05 | 0.000 | -0.051  | kleiner LLOQ | #VALUE! | 82.5 | #VALUE! |
| neg.hum.d2   | Kontrollen | E06 | 0.000 | -0.051  | kleiner LLOQ | #VALUE! | 82.5 | #VALUE! |
| neg.hum.d2   | Kontrollen | E07 | 0.000 | -0.051  | kleiner LLOQ | #VALUE! | 82.5 | #VALUE! |
| 0            | Kontrollen | E08 | 0     | 0       | kleiner LLOQ | #VALUE! | 1    | #VALUE! |
| 0            | Kontrollen | E09 | 0     | 0       | kleiner LLOQ | #VALUE! | 1    | #VALUE! |
| 0            | Kontrollen | E10 | 0     | 0       | kleiner LLOQ | #VALUE! | 1    | #VALUE! |
| 0            | Kontrollen | E11 | 0     | 0       | kleiner LLOQ | #VALUE! | 1    | #VALUE! |
| 0            | Kontrollen | E12 | 0     | #VALUE! | #VALUE!      | #VALUE! | 1    | #VALUE! |
| 0            | Kontrollen | F01 | 0     | 0       | kleiner LLOQ | #VALUE! | 1    | #VALUE! |
| pos.hd.d2    | Kontrollen | F02 | 1.334 | 1.283   | 1.283        | 0.101   | 82.5 | 8.317   |
| pos.hd.d2    | Kontrollen | F03 | 1.265 | 1.214   | 1.214        | 0.089   | 82.5 | 7.376   |
| pos.hd.d2    | Kontrollen | F04 | 1.290 | 1.239   | 1.239        | 0.094   | 82.5 | 7.722   |
| neg.hd.d2    | Kontrollen | F05 | 0.000 | -0.051  | kleiner LLOQ | #VALUE! | 82.5 | #VALUE! |
| neg.hd.d2    | Kontrollen | F06 | 0.000 | -0.051  | kleiner LLOQ | #VALUE! | 82.5 | #VALUE! |
| neg.hd.d2    | Kontrollen | F07 | 0.000 | -0.051  | kleiner LLOQ | #VALUE! | 82.5 | #VALUE! |
| 0            | Kontrollen | F08 | 0     | 0       | kleiner LLOQ | #VALUE! | 1    | #VALUE! |
| 0            | Kontrollen | F09 | 0     | 0       | kleiner LLOQ | #VALUE! | 1    | #VALUE! |
| 0            | Kontrollen | F10 | 0     | 0       | kleiner LLOQ | #VALUE! | 1    | #VALUE! |
| 0            | Kontrollen | F11 | 0     | 0       | kleiner LLOQ | #VALUE! | 1    | #VALUE! |
| 0            | Kontrollen | F12 | 0     | #VALUE! | #VALUE!      | #VALUE! | 1    | #VALUE! |
| 0            | Kontrollen | G01 | 0     | 0       | kleiner LLOQ | #VALUE! | 1    | #VALUE! |
| 0            | Kontrollen | G02 | 0     | 0       | kleiner LLOQ | #VALUE! | 1    | #VALUE! |
| 0            | Kontrollen | G03 | 0     | 0       | kleiner LLOQ | #VALUE! | 1    | #VALUE! |
| 0            | Kontrollen | G04 | 0     | 0       | kleiner LLOQ | #VALUE! | 1    | #VALUE! |
| 0            | Kontrollen | G05 | 0     | 0       | kleiner LLOQ | #VALUE! | 1    | #VALUE! |
| 0            | Kontrollen | G06 | 0     | 0       | kleiner LLOQ | #VALUE! | 1    | #VALUE! |
| Blank PEG    | Kontrollen | G07 | 0     | 0       | kleiner LLOQ | #VALUE! | 2.75 | #VALUE! |
| Blank PEG    | Kontrollen | G08 | 0     | 0       | kleiner LLOQ | #VALUE! | 2.75 | #VALUE! |
| Blank PEG    | Kontrollen | G09 | 0     | 0       | kleiner LLOQ | #VALUE! | 2.75 | #VALUE! |
| Blank PEG    | Kontrollen | G10 | 0     | 0       | kleiner LLOQ | #VALUE! | 2.75 | #VALUE! |
| Blank PEG    | Kontrollen | G11 | 0     | 0       | kleiner LLOQ | #VALUE! | 2.75 | #VALUE! |
| Blank PEG    | Kontrollen | G12 | 0     | 0       | kleiner LLOQ | #VALUE! | 2.75 | #VALUE! |
| 0            | Kontrollen | H01 | 0     | 0       | kleiner LLOQ | #VALUE! | 1    | #VALUE! |
| 0            | Kontrollen | H02 | 0     | 0       | kleiner LLOQ | #VALUE! | 1    | #VALUE! |
| 0            | Kontrollen | H03 | 0     | 0       | kleiner LLOQ | #VALUE! | 1    | #VALUE! |
| 0            | Kontrollen | H04 | 0     | 0       | kleiner LLOQ | #VALUE! | 1    | #VALUE! |
| 0            | Kontrollen | H05 | 0     | 0       | kleiner LLOQ | #VALUE! | 1    | #VALUE! |
| 0            | Kontrollen | H06 | 0     | 0       | kleiner LLOQ | #VALUE! | 1    | #VALUE! |
| Blank no PEG | Kontrollen | H07 | 0     | 0       | kleiner LLOQ | #VALUE! | 2.75 | #VALUE! |
| Blank no PEG | Kontrollen | H08 | 0     | 0       | kleiner LLOQ | #VALUE! | 2.75 | #VALUE! |
| Blank no PEG | Kontrollen | H09 | 0     | 0       | kleiner LLOQ | #VALUE! | 2.75 | #VALUE! |
| Blank no PEG | Kontrollen | H10 | 0     | 0       | kleiner LLOQ | #VALUE! | 2.75 | #VALUE! |
| Blank no PEG | Kontrollen | H11 | 0     | 0       | kleiner LLOQ | #VALUE! | 2.75 | #VALUE! |
| Blank no PEG | Kontrollen | H12 | 0     | 0       | kleiner LLOQ | #VALUE! | 2.75 | #VALUE! |

|   |     |   |              |         |   |         |
|---|-----|---|--------------|---------|---|---------|
| 0 | A01 | 0 | kleiner LLOQ | #VALUE! | 1 | #VALUE! |
| 0 | A02 | 0 | kleiner LLOQ | #VALUE! | 1 | #VALUE! |
| 0 | A03 | 0 | kleiner LLOQ | #VALUE! | 1 | #VALUE! |
| 0 | A04 | 0 | kleiner LLOQ | #VALUE! | 1 | #VALUE! |
| 0 | A05 | 0 | kleiner LLOQ | #VALUE! | 1 | #VALUE! |
| 0 | A06 | 0 | kleiner LLOQ | #VALUE! | 1 | #VALUE! |
| 0 | A07 | 0 | kleiner LLOQ | #VALUE! | 1 | #VALUE! |
| 0 | A08 | 0 | kleiner LLOQ | #VALUE! | 1 | #VALUE! |
| 0 | A09 | 0 | kleiner LLOQ | #VALUE! | 1 | #VALUE! |
| 0 | A10 | 0 | kleiner LLOQ | #VALUE! | 1 | #VALUE! |
| 0 | A11 | 0 | kleiner LLOQ | #VALUE! | 1 | #VALUE! |
| 0 | A12 | 0 | kleiner LLOQ | #VALUE! | 1 | #VALUE! |
| 0 | B01 | 0 | kleiner LLOQ | #VALUE! | 1 | #VALUE! |
| 0 | B02 | 0 | kleiner LLOQ | #VALUE! | 1 | #VALUE! |
| 0 | B03 | 0 | kleiner LLOQ | #VALUE! | 1 | #VALUE! |
| 0 | B04 | 0 | kleiner LLOQ | #VALUE! | 1 | #VALUE! |
| 0 | B05 | 0 | kleiner LLOQ | #VALUE! | 1 | #VALUE! |
| 0 | B06 | 0 | kleiner LLOQ | #VALUE! | 1 | #VALUE! |
| 0 | B07 | 0 | kleiner LLOQ | #VALUE! | 1 | #VALUE! |
| 0 | B08 | 0 | kleiner LLOQ | #VALUE! | 1 | #VALUE! |
| 0 | B09 | 0 | kleiner LLOQ | #VALUE! | 1 | #VALUE! |
| 0 | B10 | 0 | kleiner LLOQ | #VALUE! | 1 | #VALUE! |
| 0 | B11 | 0 | kleiner LLOQ | #VALUE! | 1 | #VALUE! |
| 0 | B12 | 0 | kleiner LLOQ | #VALUE! | 1 | #VALUE! |
| 0 | C01 | 0 | kleiner LLOQ | #VALUE! | 1 | #VALUE! |
| 0 | C02 | 0 | kleiner LLOQ | #VALUE! | 1 | #VALUE! |
| 0 | C03 | 0 | kleiner LLOQ | #VALUE! | 1 | #VALUE! |
| 0 | C04 | 0 | kleiner LLOQ | #VALUE! | 1 | #VALUE! |
| 0 | C05 | 0 | kleiner LLOQ | #VALUE! | 1 | #VALUE! |
| 0 | C06 | 0 | kleiner LLOQ | #VALUE! | 1 | #VALUE! |
| 0 | C07 | 0 | kleiner LLOQ | #VALUE! | 1 | #VALUE! |
| 0 | C08 | 0 | kleiner LLOQ | #VALUE! | 1 | #VALUE! |
| 0 | C09 | 0 | kleiner LLOQ | #VALUE! | 1 | #VALUE! |
| 0 | C10 | 0 | kleiner LLOQ | #VALUE! | 1 | #VALUE! |
| 0 | C11 | 0 | kleiner LLOQ | #VALUE! | 1 | #VALUE! |
| 0 | C12 | 0 | kleiner LLOQ | #VALUE! | 1 | #VALUE! |
| 0 | D01 | 0 | kleiner LLOQ | #VALUE! | 1 | #VALUE! |
| 0 | D02 | 0 | kleiner LLOQ | #VALUE! | 1 | #VALUE! |
| 0 | D03 | 0 | kleiner LLOQ | #VALUE! | 1 | #VALUE! |
| 0 | D04 | 0 | kleiner LLOQ | #VALUE! | 1 | #VALUE! |
| 0 | D05 | 0 | kleiner LLOQ | #VALUE! | 1 | #VALUE! |
| 0 | D06 | 0 | kleiner LLOQ | #VALUE! | 1 | #VALUE! |
| 0 | D07 | 0 | kleiner LLOQ | #VALUE! | 1 | #VALUE! |
| 0 | D08 | 0 | kleiner LLOQ | #VALUE! | 1 | #VALUE! |
| 0 | D09 | 0 | kleiner LLOQ | #VALUE! | 1 | #VALUE! |
| 0 | D10 | 0 | kleiner LLOQ | #VALUE! | 1 | #VALUE! |
| 0 | D11 | 0 | kleiner LLOQ | #VALUE! | 1 | #VALUE! |
| 0 | D12 | 0 | kleiner LLOQ | #VALUE! | 1 | #VALUE! |

Plate:

|   | 1 | 2 | 3 | 4 | 5 | 6 | 7 | 8 | 9 | 10 | 11 | 12 |
|---|---|---|---|---|---|---|---|---|---|----|----|----|
| A |   |   |   |   |   |   |   |   |   |    |    |    |
| B |   |   |   |   |   |   |   |   |   |    |    |    |
| C |   |   |   |   |   |   |   |   |   |    |    |    |
| D |   |   |   |   |   |   |   |   |   |    |    |    |
| E |   |   |   |   |   |   |   |   |   |    |    |    |
| F |   |   |   |   |   |   |   |   |   |    |    |    |
| G |   |   |   |   |   |   |   |   |   |    |    |    |
| H |   |   |   |   |   |   |   |   |   |    |    |    |

Plattenbelegung

|   | 1 | 2 | 3 | 4 | 5 | 6 | 7 | 8 | 9 | 10 | 11 | 12 |
|---|---|---|---|---|---|---|---|---|---|----|----|----|
| A |   |   |   |   |   |   |   |   |   |    |    |    |
| B |   |   |   |   |   |   |   |   |   |    |    |    |
| C |   |   |   |   |   |   |   |   |   |    |    |    |
| D |   |   |   |   |   |   |   |   |   |    |    |    |
| E |   |   |   |   |   |   |   |   |   |    |    |    |
| F |   |   |   |   |   |   |   |   |   |    |    |    |
| G |   |   |   |   |   |   |   |   |   |    |    |    |
| H |   |   |   |   |   |   |   |   |   |    |    |    |

Comment:

Date      Operator

Date      Control





|       |       |       |       |       |       |       |       |       |       |       |       |
|-------|-------|-------|-------|-------|-------|-------|-------|-------|-------|-------|-------|
| 1.447 | 1.739 |       | 1.170 |       |       |       |       |       | 0.667 | 0.440 | 0.043 |
| 1.447 | 1.332 |       | 1.392 | 0.137 | 0.146 | 0.130 | 0.138 | 0.109 | 0.729 | 0.478 | 0.042 |
| 1.391 | 1.281 |       | 1.311 | 0.204 | 0.184 | 0.184 | 0.198 | 0.201 | 0.743 | 0.474 | 0.043 |
| 0.961 | 0.835 |       | 1.405 | 0.336 | 0.347 | 0.375 | 0.387 | 0.300 | 0.824 | 0.483 | 0.044 |
| 0.445 | 0.441 |       | 1.280 | 1.085 | 1.086 | 1.218 | 1.004 | 0.873 | 0.704 | 0.457 | 0.041 |
| 0.355 | 0.315 |       | 1.332 | 1.768 | 1.925 | 1.753 | 1.739 | 1.606 |       |       | 0.036 |
| 0.223 | 0.188 | 1.666 | 1.499 | 1.632 |       | 0.048 | 0.046 | 0.047 | 0.048 | 0.048 | 0.048 |
| 0.118 | 0.106 | 1.556 | 1.622 | 1.573 |       | 0.047 | 0.054 | 0.051 | 0.051 | 0.052 | 0.051 |

1

|       |       |       |       |       |       |       |       |       |       |       |       |
|-------|-------|-------|-------|-------|-------|-------|-------|-------|-------|-------|-------|
| 1.652 | 1.627 |       | 1.188 | 0.748 | 0.811 | 0.764 | 0.753 | 0.674 | 0.751 | 0.529 | 0.044 |
| 1.443 | 1.372 |       | 1.364 | 0.139 | 0.147 | 0.131 | 0.139 | 0.110 | 0.811 | 0.561 | 0.043 |
| 1.377 | 1.281 |       | 1.284 | 0.206 | 0.189 | 0.184 | 0.200 | 0.202 | 0.821 | 0.560 | 0.044 |
| 0.972 | 0.883 |       | 1.387 | 0.339 | 0.349 | 0.386 | 0.406 | 0.312 | 0.903 | 0.565 | 0.044 |
| 0.484 | 0.474 |       | 1.298 | 1.087 | 1.113 | 1.203 | 1.022 | 0.903 | 0.790 | 0.544 | 0.042 |
| 0.359 | 0.326 |       | 1.308 | 1.622 | 1.622 | 1.630 | 1.625 | 1.550 |       |       | 0.037 |
| 0.228 | 0.199 | 1.527 | 1.373 | 1.462 |       | 0.048 | 0.046 | 0.048 | 0.049 | 0.049 | 0.049 |
| 0.125 | 0.109 | 1.473 | 1.410 | 1.371 |       | 0.048 | 0.054 | 0.052 | 0.052 | 0.052 | 0.051 |

2

|       |       |       |       |       |       |       |       |       |       |       |       |
|-------|-------|-------|-------|-------|-------|-------|-------|-------|-------|-------|-------|
| 1.579 | 1.475 |       | 1.150 | 1.210 | 1.303 | 1.202 | 1.219 | 1.125 | 0.759 | 0.549 | 0.043 |
| 1.357 | 1.303 |       | 1.283 | 0.140 | 0.148 | 0.131 | 0.139 | 0.111 | 0.820 | 0.575 | 0.043 |
| 1.323 | 1.228 |       | 1.227 | 0.206 | 0.188 | 0.184 | 0.198 | 0.201 | 0.824 | 0.579 | 0.043 |
| 0.959 | 0.872 |       | 1.321 | 0.339 | 0.348 | 0.387 | 0.406 | 0.314 | 0.909 | 0.580 | 0.044 |
| 0.483 | 0.473 |       | 1.270 | 1.069 | 1.103 | 1.181 | 1.017 | 0.903 | 0.798 | 0.560 | 0.042 |
| 0.360 | 0.326 |       | 1.270 | 1.497 | 1.448 | 1.496 | 1.494 | 1.449 |       |       | 0.037 |
| 0.228 | 0.199 | 1.374 | 1.262 | 1.314 |       | 0.048 | 0.046 | 0.048 | 0.049 | 0.049 | 0.049 |
| 0.125 | 0.110 | 1.346 | 1.262 | 1.253 |       | 0.048 | 0.054 | 0.052 | 0.052 | 0.052 | 0.051 |

3

|       |       |  |  |       |       |       |       |       |       |       |       |
|-------|-------|--|--|-------|-------|-------|-------|-------|-------|-------|-------|
| 1.511 | 1.369 |  |  | 1.538 | 1.712 | 1.528 | 1.502 | 1.425 |       |       | 0.043 |
| 1.296 | 1.261 |  |  |       |       |       |       |       |       |       | 0.043 |
| 1.272 | 1.193 |  |  |       |       |       |       |       |       |       | 0.043 |
| 0.947 | 0.859 |  |  |       |       |       |       |       |       |       | 0.044 |
| 0.481 | 0.471 |  |  |       |       |       |       |       |       |       | 0.042 |
| 0.361 | 0.325 |  |  |       |       |       |       |       |       |       | 0.037 |
| 0.229 | 0.199 |  |  |       |       | 0.048 | 0.046 | 0.048 | 0.049 | 0.049 | 0.049 |
| 0.125 | 0.110 |  |  |       |       | 0.047 | 0.054 | 0.052 | 0.052 | 0.052 | 0.051 |

4

|       |       |       |       |       |       |       |       |       |       |       |       |
|-------|-------|-------|-------|-------|-------|-------|-------|-------|-------|-------|-------|
| 1.493 | 1.317 | 1.678 | 1.110 | 1.621 | 1.807 | 1.618 | 1.584 | 1.508 | 0.765 | 0.597 | 0.043 |
| 1.259 | 1.238 | 1.850 | 1.197 | 0.139 | 0.150 | 0.132 | 0.139 | 0.111 | 0.821 | 0.588 | 0.043 |
| 1.248 | 1.175 | 1.816 | 1.153 | 0.204 | 0.188 | 0.184 | 0.197 | 0.199 | 0.831 | 0.599 | 0.044 |
| 0.943 | 0.859 | 1.970 | 1.231 | 0.338 | 0.357 | 0.386 | 0.406 | 0.316 | 0.916 | 0.595 | 0.044 |
| 0.480 | 0.470 | 2.220 | 1.220 | 1.054 | 1.088 | 1.154 | 1.006 | 0.902 | 0.805 | 0.579 | 0.042 |
| 0.359 | 0.325 | 2.149 | 1.211 | 1.395 | 1.324 | 1.348 | 1.345 | 1.317 | 0.037 | 0.037 | 0.037 |
| 0.228 | 0.199 | 1.240 | 1.151 | 1.183 | 0.034 | 0.049 | 0.046 | 0.048 | 0.049 | 0.049 | 0.049 |
| 0.125 | 0.110 | 1.223 | 1.132 | 1.146 | 0.038 | 0.048 | 0.054 | 0.052 | 0.052 | 0.052 | 0.051 |

5

|       |       |  |       |       |       |       |       |       |       |       |       |
|-------|-------|--|-------|-------|-------|-------|-------|-------|-------|-------|-------|
| 1.434 | 1.258 |  | 1.090 | 1.648 | 1.876 | 1.649 | 1.627 | 1.535 |       |       |       |
| 1.217 | 1.201 |  | 1.149 |       |       |       |       |       |       |       |       |
| 1.205 | 1.143 |  | 1.109 |       |       |       |       |       |       |       |       |
| 0.935 | 0.845 |  | 1.182 |       |       |       |       |       |       |       |       |
| 0.477 | 0.469 |  | 1.181 |       |       |       |       |       |       |       |       |
| 0.360 | 0.323 |  | 1.167 |       |       |       |       |       |       |       |       |
| 0.229 | 0.200 |  |       |       |       | 0.049 | 0.047 | 0.048 | 0.049 | 0.049 | 0.049 |
| 0.125 | 0.110 |  |       |       |       | 0.048 | 0.054 | 0.052 | 0.052 | 0.052 | 0.051 |

6

|       |       |       |       |       |       |       |       |       |       |       |       |
|-------|-------|-------|-------|-------|-------|-------|-------|-------|-------|-------|-------|
| 1.013 | 0.810 |       | 0.668 | 0.808 | 0.940 | 0.720 | 0.798 | 0.687 | 0.904 | 0.845 | 0.043 |
| 0.709 | 0.827 |       | 0.703 | 0.142 | 0.156 | 0.136 | 0.137 | 0.116 | 0.990 | 0.846 | 0.042 |
| 0.682 | 0.692 |       | 0.680 | 0.197 | 0.188 | 0.190 | 0.191 | 0.184 | 1.023 | 0.861 | 0.043 |
| 0.507 | 0.519 |       | 0.740 | 0.316 | 0.264 | 0.364 | 0.377 | 0.312 | 1.111 | 0.870 | 0.043 |
| 0.394 | 0.406 |       | 0.682 | 0.580 | 0.561 | 0.600 | 0.529 | 0.563 | 0.962 | 0.834 | 0.042 |
| 0.333 | 0.322 |       | 0.661 | 0.995 | 0.930 | 0.848 | 0.832 | 0.797 | 0.037 | 0.037 | 0.037 |
| 0.229 | 0.201 | 0.843 | 0.679 | 0.732 |       | 0.048 | 0.046 | 0.047 |       |       | 0.047 |
| 0.124 | 0.111 | 0.773 | 0.682 | 0.701 |       | 0.047 | 0.053 | 0.051 | 0.051 | 0.052 | 0.051 |

7

Kontrollen

|       |  |  |  |  |  |  |       |       |       |       |       |       |
|-------|--|--|--|--|--|--|-------|-------|-------|-------|-------|-------|
| 3.126 |  |  |  |  |  |  |       |       |       |       |       |       |
| 1.664 |  |  |  |  |  |  |       |       |       |       |       |       |
| 3.141 |  |  |  |  |  |  |       |       |       |       |       |       |
|       |  |  |  |  |  |  |       |       |       |       |       |       |
|       |  |  |  |  |  |  |       |       |       |       |       |       |
|       |  |  |  |  |  |  |       |       |       |       |       |       |
|       |  |  |  |  |  |  | 0.046 | 0.047 | 0.048 | 0.049 | 0.048 | 0.048 |
|       |  |  |  |  |  |  | 0.047 | 0.046 | 0.048 | 0.048 | 0.046 | 0.052 |

1

|  |       |       |       |       |       |       |       |       |       |       |       |       |
|--|-------|-------|-------|-------|-------|-------|-------|-------|-------|-------|-------|-------|
|  | 2.229 | 2.249 | 2.221 | 0.105 | 0.106 | 0.109 |       |       |       |       |       |       |
|  | 0.897 | 0.909 | 0.928 | 0.088 | 0.089 | 0.087 |       |       |       |       |       |       |
|  | 1.755 | 1.748 | 1.733 | 0.186 | 0.184 | 0.182 |       |       |       |       |       |       |
|  |       |       |       |       |       |       |       |       |       |       |       |       |
|  |       |       |       |       |       |       |       |       |       |       |       |       |
|  |       |       |       |       |       |       |       |       |       |       |       |       |
|  |       |       |       |       |       |       | 0.046 | 0.046 | 0.049 | 0.050 | 0.048 | 0.050 |
|  |       |       |       |       |       |       | 0.048 | 0.047 | 0.048 | 0.047 | 0.046 | 0.050 |

2

|  |       |       |       |       |       |       |       |       |       |       |       |       |
|--|-------|-------|-------|-------|-------|-------|-------|-------|-------|-------|-------|-------|
|  |       |       |       |       |       |       |       |       |       |       |       |       |
|  |       |       |       |       |       |       |       |       |       |       |       |       |
|  |       |       |       |       |       |       |       |       |       |       |       |       |
|  | 1.040 | 1.053 | 1.067 | 0.077 | 0.076 | 0.073 |       |       |       |       |       |       |
|  | 1.334 | 1.265 | 1.290 | 0.117 | 0.116 | 0.115 |       |       |       |       |       |       |
|  |       |       |       |       |       |       | 0.045 | 0.047 | 0.049 | 0.050 | 0.048 | 0.050 |
|  |       |       |       |       |       |       | 0.048 | 0.046 | 0.050 | 0.048 | 0.047 | 0.049 |

3
