# Supplementary material for: Establishment of an in vitro model of cultured viable human, porcine and canine skin and comparison of different media supplements
Source: PeerJ journal article supplement (doi:10.7717/peerj.7811), 2019-10-03
Supplement: Stat.2.pdf [file Stat.2.pdf]

OriginPro 2018 64-bit - C:\Users\Feechak\Documents\OriginLab\User Files\letzte stat - Folder1 - [Book1]

File Edit View Plot Column Worksheet Analysis Statistics Image Tools Format Window Help

100%

Median Test (29-Jun-19 23:51:05)

Notes

Input Data

| Group                      | Range   |
|----------------------------|---------|
| Group Range (Book1)Sheet1A | [14:15] |
| Data Range (Book1)Sheet1B  | [14:15] |

Descriptive Statistics

|   | N | Min   | Q1    | Median | Q3    | Max   |
|---|---|-------|-------|--------|-------|-------|
| A | 2 | 47.98 | 47.98 | 47.98  | 47.98 | 47.98 |
| B | 2 | 55.17 | 55.17 | 55.17  | 55.17 | 55.17 |

Test Statistics

| Median | Chi-Square | DF | Prob>Chi-Square |
|--------|------------|----|-----------------|
| 51.575 | 4          | 1  | 0.0455          |

Null hypothesis: The samples come from the same population.  
 Alternative hypothesis: The samples come from different populations.  
 At the 0.05 level, the populations are significantly different.

Object Manager

Apps

- Add Apps
- Send Graphs to PowerPoint...
- Send Graphs to Word
- Simple Fit

For Help, press F1

Average=0 Sum=0 Count=0 AU: ON

OriginPro 2018 64-bit - C:\Users\Feechak\Documents\OriginLab\User Files\letzte stat - Folder1 - [Book1]

File Edit View Plot Column Worksheet Analysis Statistics Image Tools Format Window Help

100%

Median Test (29-Jun-19 23:51:35)

Notes

Input Data

| Group                      | Range   |
|----------------------------|---------|
| Group Range (Book1)Sheet1A | [17:18] |
| Data Range (Book1)Sheet1B  | [17:18] |

Descriptive Statistics

|   | N | Min   | Q1    | Median | Q3    | Max   |
|---|---|-------|-------|--------|-------|-------|
| A | 2 | 64.93 | 64.93 | 64.93  | 64.93 | 64.93 |
| B | 2 | 67.83 | 67.83 | 67.83  | 67.83 | 67.83 |

Test Statistics

| Median | Chi-Square | DF | Prob>Chi-Square |
|--------|------------|----|-----------------|
| 66.33  | 4          | 1  | 0.0455          |

Null hypothesis: The samples come from the same population.  
 Alternative hypothesis: The samples come from different populations.  
 At the 0.05 level, the populations are significantly different.

Object Manager

Apps

- Add Apps
- Send Graphs to PowerPoint...
- Send Graphs to Word
- Simple Fit

For Help, press F1

Average=0 Sum=0 Count=0 AU: ON

OriginPro 2018 64-bit - C:\Users\Feechak\Documents\OriginLab\User Files\letzte stat - Folder1 - [Book1]

File Edit View Plot Column Worksheet Analysis Statistics Image Tools Format Window Help

100%

Median Test (29-Jun-19 23:52:09)

Notes

Input Data

| Group                      | Range   |
|----------------------------|---------|
| Group Range (Book1)Sheet1A | [21:22] |
| Data Range (Book1)Sheet1B  | [21:22] |

Descriptive Statistics

|   | N | Min   | Q1    | Median | Q3    | Max   |
|---|---|-------|-------|--------|-------|-------|
| A | 2 | 51.9  | 51.9  | 51.9   | 51.9  | 51.9  |
| B | 2 | 55.77 | 55.77 | 55.77  | 55.77 | 55.77 |

Test Statistics

| Median | Chi-Square | DF | Prob>Chi-Square |
|--------|------------|----|-----------------|
| 53.835 | 4          | 1  | 0.0455          |

Null hypothesis: The samples come from the same population.  
 Alternative hypothesis: The samples come from different populations.  
 At the 0.05 level, the populations are significantly different.

Object Manager

Apps

- Add Apps
- Send Graphs to PowerPoint...
- Send Graphs to Word
- Simple Fit

For Help, press F1

Average=0 Sum=0 Count=0 AU: ON

OriginPro 2018 64-bit - C:\Users\Feechak\Documents\OriginLab\User Files\letzte stat - Folder1 - [Book1]

File Edit View Plot Column Worksheet Analysis Statistics Image Tools Format Window Help

100%

Median Test (29-Jun-19 23:55:58)

Notes

Input Data

| Group                      | Range   |
|----------------------------|---------|
| Group Range (Book1)Sheet1B | [10:11] |
| Data Range (Book1)Sheet1C  | [10:11] |

Descriptive Statistics

|   | N | Min   | Q1    | Median | Q3    | Max   |
|---|---|-------|-------|--------|-------|-------|
| A | 2 | 50.97 | 50.97 | 51.015 | 51.06 | 51.06 |
| C | 2 | 55.17 | 55.17 | 55.255 | 55.34 | 55.34 |

Test Statistics

| Median | Chi-Square | DF | Prob>Chi-Square |
|--------|------------|----|-----------------|
| 53.115 | 4          | 1  | 0.0455          |

Null hypothesis: The samples come from the same population.  
 Alternative hypothesis: The samples come from different populations.  
 At the 0.05 level, the populations are significantly different.

Object Manager

Apps

- Add Apps
- Send Graphs to PowerPoint...
- Send Graphs to Word
- Simple Fit

For Help, press F1

Average=0 Sum=0 Count=0 AU: ON
