# Supplementary material for: Establishment of an in vitro model of cultured viable human, porcine and canine skin and comparison of different media supplements
Source: PeerJ journal article supplement (doi:10.7717/peerj.7811), 2019-10-03
Supplement: Statistik.pdf [file Statistik.pdf]

### Kruskal-Wallis ANOVA (17.04.2019 15:31:03)

**Notes**

|            |                      |
|------------|----------------------|
| X-Function | Kruskal-Wallis ANOVA |
| User Name  | i.bauhammer          |
| Time       | 17.04.2019 15:31:03  |

**Input Data**

|     | Data              | Range |
|-----|-------------------|-------|
| sui | [Book1]Sheet1!B"s | [2:4] |
| hd  | [Book1]Sheet1!C"h | [2:4] |
| hu  | [Book1]Sheet1!D"h | [2:4] |

**Descriptive Statistics**

|   | N | Min   | Q1    | Median | Q3    | Max   |
|---|---|-------|-------|--------|-------|-------|
| B | 3 | 47.72 | 47.72 | 50.63  | 54.85 | 54.85 |
| C | 3 | 64.93 | 64.93 | 65.43  | 67.83 | 67.83 |
| D | 3 | 51.9  | 51.9  | 52.05  | 55.12 | 55.12 |

**Ranks**

|   | N | Mean Rank | Sum Rank |
|---|---|-----------|----------|
| B | 3 | 2.66667   | 8        |
| C | 3 | 8         | 24       |
| D | 3 | 4.33333   | 13       |

**Test Statistics**

| Chi-Square | DF | Prob>Chi-Square |
|------------|----|-----------------|
| 5.95556    | 2  | 0.05091         |

Null Hypothesis: The samples come from the same population.  
Alternative Hypothesis: The samples come from different populations.  
: At the 0.05 level, the populations are NOT significantly different.

### Kruskal-Wallis ANOVA (17.04.2019 15:33:00)

**Notes**

|            |                      |
|------------|----------------------|
| X-Function | Kruskal-Wallis ANOVA |
| User Name  | i.bauhammer          |
| Time       | 17.04.2019 15:33:00  |

**Input Data**

|     | Data                 | Range |
|-----|----------------------|-------|
| hd  | [Book1]Sheet1!C"hd"  | [2:4] |
| hum | [Book1]Sheet1!D"hum" | [2:4] |

**Descriptive Statistics**

|       | N | Min   | Q1    | Median | Q3    | Max   |
|-------|---|-------|-------|--------|-------|-------|
| "hd"  | 3 | 64.93 | 64.93 | 65.43  | 67.83 | 67.83 |
| "hum" | 3 | 51.9  | 51.9  | 52.05  | 55.12 | 55.12 |

**Ranks**

|       | N | Mean Rank | Sum Rank |
|-------|---|-----------|----------|
| "hd"  | 3 | 5         | 15       |
| "hum" | 3 | 2         | 6        |

**Test Statistics**

| Chi-Square | DF | Prob>Chi-Square |
|------------|----|-----------------|
| 3.85714    | 1  | 0.04953         |

Null Hypothesis: The samples come from the same population.  
Alternative Hypothesis: The samples come from different populations.  
: At the 0.05 level, the populations are significantly different.

1 Nonparametric Analysis (K Sample) (17.04.2019 15:43:45)

**Notes**

|            |                                   |
|------------|-----------------------------------|
| X-Function | Nonparametric Analysis (K Sample) |
| User Name  | i.bauhammer                       |
| Time       | 17.04.2019 15:43:45               |

**Input Data**

|     | Data                 | Range |
|-----|----------------------|-------|
| sui | [Book1]Sheet1!B"sui" | [2:4] |
| hd  | [Book1]Sheet1!C"hd"  | [2:4] |
| hum | [Book1]Sheet1!D"hum" | [2:4] |

**Descriptive Statistics**

|       | N | Min   | Q1    | Median | Q3    | Max   |
|-------|---|-------|-------|--------|-------|-------|
| "sui" | 3 | 47.72 | 47.72 | 50.63  | 54.85 | 54.85 |
| "hd"  | 3 | 64.93 | 64.93 | 65.43  | 67.83 | 67.83 |
| "hum" | 3 | 51.9  | 51.9  | 52.05  | 55.12 | 55.12 |

**Kruskal-Wallis ANOVA test**

**Ranks**

|       | N | Mean Rank | Sum Rank |
|-------|---|-----------|----------|
| "sui" | 3 | 2.66667   | 8        |
| "hd"  | 3 | 8         | 24       |
| "hum" | 3 | 4.33333   | 13       |

**Test Statistics**

| Chi-Square | DF | Prob>Chi-Square |
|------------|----|-----------------|
| 5.95556    | 2  | 0.05091         |

Null Hypothesis: The samples come from the same population.  
Alternative Hypothesis: The samples come from different populations.  
: At the 0.05 level, the populations are NOT significantly different.

**Median test**

**Frequencies**

|       | N | >Median | <=Median |
|-------|---|---------|----------|
| "sui" | 3 | 0       | 3        |
| "hd"  | 3 | 3       | 0        |
| "hum" | 3 | 1       | 2        |

**Test Statistics**

| Median | Chi-Square | DF | Prob>Chi-Square |
|--------|------------|----|-----------------|
| 54.85  | 6.3        | 2  | 0.04285         |

Null Hypothesis: The samples come from the same population.  
Alternative Hypothesis: The samples come from different populations.  
: At the 0.05 level, the populations are significantly different.

1 Nonparametric Analysis (K Sample) (17.04.2019 15:45:01)

**Notes**

|            |                                   |
|------------|-----------------------------------|
| X-Function | Nonparametric Analysis (K Sample) |
| User Name  | i.bauhammer                       |
| Time       | 17.04.2019 15:45:01               |

**Input Data**

|     | Data                 | Range |
|-----|----------------------|-------|
| sui | [Book1]Sheet1!B"sui" | [2:4] |
| hd  | [Book1]Sheet1!C"hd"  | [2:4] |

**Descriptive Statistics**

|       | N | Min   | Q1    | Median | Q3    | Max   |
|-------|---|-------|-------|--------|-------|-------|
| "sui" | 3 | 47.72 | 47.72 | 50.63  | 54.85 | 54.85 |
| "hd"  | 3 | 64.93 | 64.93 | 65.43  | 67.83 | 67.83 |

**Kruskal-Wallis ANOVA test**

**Ranks**

|       | N | Mean Rank | Sum Rank |
|-------|---|-----------|----------|
| "sui" | 3 | 2         | 6        |
| "hd"  | 3 | 5         | 15       |

**Test Statistics**

| Chi-Square | DF | Prob>Chi-Square |
|------------|----|-----------------|
| 3.85714    | 1  | 0.04953         |

Null Hypothesis: The samples come from the same population.  
Alternative Hypothesis: The samples come from different populations.  
: At the 0.05 level, the populations are significantly different.

**Median test**

**Frequencies**

|       | N | >Median | <=Median |
|-------|---|---------|----------|
| "sui" | 3 | 0       | 3        |
| "hd"  | 3 | 3       | 0        |

**Test Statistics**

| Median | Chi-Square | DF | Prob>Chi-Square |
|--------|------------|----|-----------------|
| 59.89  | 6          | 1  | 0.01431         |

Null Hypothesis: The samples come from the same population.  
Alternative Hypothesis: The samples come from different populations.  
: At the 0.05 level, the populations are significantly different.

1 Nonparametric Analysis (K Sample) (17.04.2019 16:34:50)

Notes

|            |                                   |
|------------|-----------------------------------|
| X-Function | Nonparametric Analysis (K Sample) |
| User Name  | i.bauhammer                       |
| Time       | 17.04.2019 16:34:50               |

Input Data

|     | Data                 | Range |
|-----|----------------------|-------|
| hum | [Book1]Sheet1!H"hum" | [1:3] |
| sui | [Book1]Sheet1!I"sui" | [1:3] |
| hd  | [Book1]Sheet1!J"hd"  | [1:3] |

Descriptive Statistics

|       | N | Min   | Q1    | Median | Q3    | Max   |
|-------|---|-------|-------|--------|-------|-------|
| "hum" | 3 | 73.19 | 73.19 | 78.2   | 78.43 | 78.43 |
| "sui" | 3 | 56.36 | 56.36 | 61.63  | 65.26 | 65.26 |
| "hd"  | 3 | 18.43 | 18.43 | 19.8   | 20.1  | 20.1  |

Kruskal-Wallis ANOVA test

Ranks

|       | N | Mean Rank | Sum Rank |
|-------|---|-----------|----------|
| "hum" | 3 | 8         | 24       |
| "sui" | 3 | 5         | 15       |
| "hd"  | 3 | 2         | 6        |

Test Statistics

| Chi-Square | DF | Prob>Chi-Square |
|------------|----|-----------------|
| 7.2        | 2  | 0.02732         |

Null Hypothesis: The samples come from the same population.  
Alternative Hypothesis: The samples come from different populations.  
: At the 0.05 level, the populations are significantly different.

Median test

Frequencies

|       | N | >Median | <=Median |
|-------|---|---------|----------|
| "hum" | 3 | 3       | 0        |
| "sui" | 3 | 1       | 2        |
| "hd"  | 3 | 0       | 3        |

Test Statistics

| Median | Chi-Square | DF | Prob>Chi-Square |
|--------|------------|----|-----------------|
| 61.63  | 6.3        | 2  | 0.04285         |

Null Hypothesis: The samples come from the same population.  
Alternative Hypothesis: The samples come from different populations.  
: At the 0.05 level, the populations are significantly different.

1 Nonparametric Analysis (K Sample) (17.04.2019 16:38:43)

**Notes**

|            |                                   |
|------------|-----------------------------------|
| X-Function | Nonparametric Analysis (K Sample) |
| User Name  | i.bauhammer                       |
| Time       | 17.04.2019 16:38:43               |

**Input Data**

|       | Data                   | Range |
|-------|------------------------|-------|
| hum r | [Book1]Sheet1!K"hum r" | [1:6] |
| sui r | [Book1]Sheet1!L"sui r" | [1:6] |
| hd r  | [Book1]Sheet1!M"hd r"  | [1:6] |

**Descriptive Statistics**

|         | N | Min   | Q1    | Median | Q3    | Max   |
|---------|---|-------|-------|--------|-------|-------|
| "hum r" | 6 | 44.88 | 44.88 | 47.95  | 48.95 | 48.95 |
| "sui r" | 6 | 45.15 | 45.15 | 49.37  | 52.28 | 52.28 |
| "hd r"  | 6 | 32.17 | 32.17 | 34.57  | 35.07 | 35.07 |

**Kruskal-Wallis ANOVA test**

**Ranks**

|         | N | Mean Rank | Sum Rank |
|---------|---|-----------|----------|
| "hum r" | 6 | 10.83333  | 65       |
| "sui r" | 6 | 14.16667  | 85       |
| "hd r"  | 6 | 3.5       | 21       |

**Test Statistics**

| Chi-Square | DF | Prob>Chi-Square |
|------------|----|-----------------|
| 12.65556   | 2  | 0.00179         |

Null Hypothesis: The samples come from the same population.  
Alternative Hypothesis: The samples come from different populations.  
: At the 0.05 level, the populations are significantly different.

**Median test**

**Frequencies**

|         | N | >Median | <=Median |
|---------|---|---------|----------|
| "hum r" | 6 | 4       | 2        |
| "sui r" | 6 | 4       | 2        |
| "hd r"  | 6 | 0       | 6        |

**Test Statistics**

| Median | Chi-Square | DF | Prob>Chi-Square |
|--------|------------|----|-----------------|
| 45.15  | 7.2        | 2  | 0.02732         |

Null Hypothesis: The samples come from the same population.  
Alternative Hypothesis: The samples come from different populations.  
: At the 0.05 level, the populations are significantly different.

1 Nonparametric Analysis (K Sample) (17.04.2019 16:59:18)

**Notes**

|            |                                   |
|------------|-----------------------------------|
| X-Function | Nonparametric Analysis (K Sample) |
| User Name  | i.bauhammer                       |
| Time       | 17.04.2019 16:59:18               |

**Input Data**

|     | Data                 | Range |
|-----|----------------------|-------|
| hd  | [Book1]Sheet1!N"hd"  | [1:1] |
| hum | [Book1]Sheet1!O"hum" | [1:1] |
| sui | [Book1]Sheet1!P"sui" | [1:1] |

**Descriptive Statistics**

|       | N | Min   | Q1    | Median | Q3    | Max   |
|-------|---|-------|-------|--------|-------|-------|
| "hd"  | 1 | 83.26 | 83.26 | 83.26  | 83.26 | 83.26 |
| "hum" | 1 | 73.76 | 73.76 | 73.76  | 73.76 | 73.76 |
| "sui" | 1 | 67.46 | 67.46 | 67.46  | 67.46 | 67.46 |

**Kruskal-Wallis ANOVA test**

**Ranks**

|       | N | Mean Rank | Sum Rank |
|-------|---|-----------|----------|
| "hd"  | 1 | 3         | 3        |
| "hum" | 1 | 2         | 2        |
| "sui" | 1 | 1         | 1        |

**Test Statistics**

| Chi-Square | DF | Prob>Chi-Square |
|------------|----|-----------------|
| 2          | 2  | 0.36788         |

Null Hypothesis: The samples come from the same population.  
Alternative Hypothesis: The samples come from different populations.  
: At the 0.05 level, the populations are NOT significantly different.

**Median test**

**Frequencies**

|       | N | >Median | <=Median |
|-------|---|---------|----------|
| "hd"  | 1 | 1       | 0        |
| "hum" | 1 | 0       | 1        |
| "sui" | 1 | 0       | 1        |

**Test Statistics**

| Median | Chi-Square | DF | Prob>Chi-Square |
|--------|------------|----|-----------------|
| 73.76  | 3          | 2  | 0.22313         |

Null Hypothesis: The samples come from the same population.  
Alternative Hypothesis: The samples come from different populations.  
: At the 0.05 level, the populations are NOT significantly different.



1 Nonparametric Analysis (K Sample) (17.04.2019 17:00:50)

**Notes**

|            |                                   |
|------------|-----------------------------------|
| X-Function | Nonparametric Analysis (K Sample) |
| User Name  | i.bauhammer                       |
| Time       | 17.04.2019 17:00:50               |

**Input Data**

|     | Data                 | Range |
|-----|----------------------|-------|
| hd  | [Book1]Sheet1!N"hd"  | [1:3] |
| hum | [Book1]Sheet1!O"hum" | [1:3] |
| sui | [Book1]Sheet1!P"sui" | [1:3] |

**Descriptive Statistics**

|       | N | Min   | Q1    | Median | Q3    | Max   |
|-------|---|-------|-------|--------|-------|-------|
| "hd"  | 3 | 83.26 | 83.26 | 83.26  | 83.26 | 83.26 |
| "hum" | 3 | 73.76 | 73.76 | 73.76  | 73.76 | 73.76 |
| "sui" | 3 | 67.46 | 67.46 | 67.46  | 67.46 | 67.46 |

**Kruskal-Wallis ANOVA test**

**Ranks**

|       | N | Mean Rank | Sum Rank |
|-------|---|-----------|----------|
| "hd"  | 3 | 8         | 24       |
| "hum" | 3 | 5         | 15       |
| "sui" | 3 | 2         | 6        |

**Test Statistics**

|  | Chi-Square | DF | Prob>Chi-Square |
|--|------------|----|-----------------|
|  | 8          | 2  | 0.01832         |

Null Hypothesis: The samples come from the same population.  
 Alternative Hypothesis: The samples come from different populations.  
 : At the 0.05 level, the populations are significantly different.

**Median test**

**Frequencies**

|       | N | >Median | <=Median |
|-------|---|---------|----------|
| "hd"  | 3 | 3       | 0        |
| "hum" | 3 | 0       | 3        |
| "sui" | 3 | 0       | 3        |

**Test Statistics**

|  | Median | Chi-Square | DF | Prob>Chi-Square |
|--|--------|------------|----|-----------------|
|  | 73.76  | 9          | 2  | 0.01111         |

Null Hypothesis: The samples come from the same population.  
 Alternative Hypothesis: The samples come from different populations.  
 : At the 0.05 level, the populations are significantly different.

1 Nonparametric Analysis (K Sample) (17.04.2019 17:01:56)

**Notes**

|            |                                   |
|------------|-----------------------------------|
| X-Function | Nonparametric Analysis (K Sample) |
| User Name  | i.bauhammer                       |
| Time       | 17.04.2019 17:01:56               |

**Input Data**

|     | Data                 | Range   |
|-----|----------------------|---------|
| hd  | [Book1]Sheet1!N"hd"  | [15:17] |
| hum | [Book1]Sheet1!O"hum" | [15:17] |
| sui | [Book1]Sheet1!P"sui" | [15:17] |

**Descriptive Statistics**

|       | N | Min   | Q1    | Median | Q3    | Max   |
|-------|---|-------|-------|--------|-------|-------|
| "hd"  | 3 | 67.7  | 67.7  | 67.7   | 67.7  | 67.7  |
| "hum" | 3 | 54.18 | 54.18 | 54.18  | 54.18 | 54.18 |
| "sui" | 3 | 52.13 | 52.13 | 52.13  | 52.13 | 52.13 |

**Kruskal-Wallis ANOVA test**

**Ranks**

|       | N | Mean Rank | Sum Rank |
|-------|---|-----------|----------|
| "hd"  | 3 | 8         | 24       |
| "hum" | 3 | 5         | 15       |
| "sui" | 3 | 2         | 6        |

**Test Statistics**

|  | Chi-Square | DF | Prob>Chi-Square |
|--|------------|----|-----------------|
|  | 8          | 2  | 0.01832         |

Null Hypothesis: The samples come from the same population.  
 Alternative Hypothesis: The samples come from different populations.  
 : At the 0.05 level, the populations are significantly different.

**Median test**

**Frequencies**

|       | N | >Median | <=Median |
|-------|---|---------|----------|
| "hd"  | 3 | 3       | 0        |
| "hum" | 3 | 0       | 3        |
| "sui" | 3 | 0       | 3        |

**Test Statistics**

|  | Median | Chi-Square | DF | Prob>Chi-Square |
|--|--------|------------|----|-----------------|
|  | 54.18  | 9          | 2  | 0.01111         |

Null Hypothesis: The samples come from the same population.  
 Alternative Hypothesis: The samples come from different populations.  
 : At the 0.05 level, the populations are significantly different.
