# Supplementary material for: Establishment of an in vitro model of cultured viable human, porcine and canine skin and comparison of different media supplements
Source: PeerJ. 2019 Oct 3;7:e7811. doi: 10.7717/peerj.7811 (PMC6778665; doi:10.7717/peerj.7811)
Supplement: Supplemental Information 4 [file peerj-07-7811-s004.xlsx]

## Sheet: human basic
Time point		t0 Monday								t1								t2								t3								t4								t5
Date
Time of cultivation [days]
Skin sample	Weight of punch [g]	Vol. Medium [mL]	Measur. Nr.	LDH activity [U/mL]	LDH activity [U/mL/gskin]	LDH activity [U/gskin]	Mean LDH activity [U/gskin]	SD [U/gskin]	RSD [%]	Vol. Medium [mL]	Measur. Nr.	LDH activity [U/mL]	LDH activity [U/mL/gskin]	LDH activity [U/gskin]	Mean LDH activity [U/gskin]	SD [U/gskin]	RSD [%]	Vol. Medium [mL]	Measur. Nr.	LDH activity [U/mL]	LDH activity [U/mL/gskin]	LDH activity [U/gskin]	Mean LDH activity [U/gskin]	SD [U/gskin]	RSD [%]	Vol. Medium [mL]	Measur. Nr.	LDH activity [U/mL]	LDH activity [U/mL/gskin]	LDH activity [U/gskin]	Mean LDH activity [U/gskin]	SD [U/gskin]	RSD [%]	Vol. Medium [mL]	Measur. Nr.	LDH activity [U/mL]	LDH activity [U/mL/gskin]	LDH activity [U/gskin]	Mean LDH activity [U/gskin]	SD [U/gskin]	RSD [%]	Vol. Medium [mL]	Measur. Nr.	LDH activity [U/mL]	LDH activity [U/mL/gskin]	LDH activity [U/gskin]	Mean LDH activity [U/gskin]	SD [U/gskin]	RSD [%]
S1	0.28989	0.7	1	5.84746	20.1713	14.1199	19.1223	5.00238	26.1599	0.7	1	0.216386	0.746441	0.522508	0.452296	0.0702123	15.5235	0.7	1	0.886933	3.05955	2.14169	2.11018	0.0315095	1.49322	0.7	1	0.0490219	0.169105	0.118374	0.128533	0.0101596	7.90424	0.7	1	0.18373	0.633791	0.443654	0.427756	0.0158979	3.71658	0.7	1	0.868995	2.99767	2.09837	2.11944	0.0210757	0.994399
			2	9.99072	34.4638	24.1247					2	0.158232	0.545834	0.382084					2	0.860835	2.96952	2.07867					2	0.0574366	0.198132	0.138693					2	0.170562	0.588369	0.411858					2	0.886451	3.05789	2.14052
S2	0.32927		1	5.16421	15.6838	10.9787	10.9787	0	0		1	0.645527	1.96048	1.37233	1.37233	0	0		1	0.803785	2.44111	1.70878	1.68784	0.0209397	1.24062		1	0.0278488	0.0845775	0.0592042	0.0652689	0.00606463	9.29176		1	1.15782	3.51632	2.46143	2.29591	0.165516	7.20919		1	1.69042	5.13383	3.59368	3.71519	0.121511	3.27065
			2		0	0					2		0	0					2	0.784086	2.38129	1.6669					2	0.0335543	0.101905	0.0713335					2	1.00211	3.04342	2.13039					2	1.80473	5.48101	3.8367
S3	0.28322		1	7.88275	27.8326	19.4828	17.2371	2.2457	13.0283		1	0.246336	0.869769	0.608838	0.53866	0.0701781	13.0283		1	1.28852	4.54954	3.18468	3.0732	0.111475	3.62732		1	0.040162	0.141805	0.0992634	0.0995123	0.000248853	0.250073		1	0.976563	3.44807	2.41365	2.42265	0.0089964	0.371346		1	1.16736	4.12176	2.88523	2.84216	0.0430649	1.51521
			2	6.06553	21.4163	14.9914					2	0.189548	0.66926	0.468482					2	1.19832	4.23104	2.96173					2	0.0403634	0.142516	0.0997611					2	0.983843	3.47378	2.43164					2	1.13252	3.99871	2.7991
S4	0.33416		1	0.0510057	0.152639	0.106847	0.0956154	0.0112316	11.7466		1	0.0510057	0.152639	0.106847	0.0956154	0.0112316	11.7466		1		0	0	0	0	#DIV/0!		1		0	0	0	0	#DIV/0!		1	0.0459516	0.137514	0.0962597	0.0955461	0.000713633	0.746899		1	0.0850204	0.25443	0.178101	0.175592	0.0025088	1.42876
			2	0.0402825	0.120548	0.0843839					2	0.0402825	0.120548	0.0843839					2		0	0					2		0	0					2	0.0452703	0.135475	0.0948324					2	0.0826251	0.247262	0.173083
Sum LDH activity [U/g skin]		47.3381								2.36329								6.87122								0.293314								5.14631								8.6768
Mean LDH activity [U/gskin]		15.7794								0.787764								2.29041								0.0977714								1.71544								2.89227
SD [U/g skin]		3.48075								0.414855								0.579754								0.0258568								0.911997								0.652424
RSD [%]		22.0589								52.6624								25.3123								26.4462								53.1641								22.5575
		t6								t7								t8								t9								t10								t11
		Vol. Medium [mL]	Measur. Nr.	LDH activity [U/mL]	LDH activity [U/mL/gskin]	LDH activity [U/gskin]	Mean LDH activity [U/gskin]	SD [U/gskin]	RSD [%]	Vol. Medium [mL]	Measur. Nr.	LDH activity [U/mL]	LDH activity [U/mL/gskin]	LDH activity [U/gskin]	Mean LDH activity [U/gskin]	SD [U/gskin]	RSD [%]	Vol. Medium [mL]	Measur. Nr.	LDH activity [U/mL]	LDH activity [U/mL/gskin]	LDH activity [U/gskin]	Mean LDH activity [U/gskin]	SD [U/gskin]	RSD [%]	Vol. Medium [mL]	Measur. Nr.	LDH activity [U/mL]	LDH activity [U/mL/gskin]	LDH activity [U/gskin]	Mean LDH activity [U/gskin]	SD [U/gskin]	RSD [%]	Vol. Medium [mL]	Measur. Nr.	LDH activity [U/mL]	LDH activity [U/mL/gskin]	LDH activity [U/gskin]	Mean LDH activity [U/gskin]	SD [U/gskin]	RSD [%]	Vol. Medium [mL]	Measur. Nr.	LDH activity [U/mL]	LDH activity [U/mL/gskin]	LDH activity [U/gskin]	Mean LDH activity [U/gskin]	SD [U/gskin]	RSD [%]
		0.7	1	0.82426	2.84335	1.99035	1.63002	0.360327	22.1057	0.7	1	0.189391	0.653322	0.457325	0.467457	0.0101322	2.16751	0.7	1	0.0719896	0.248334	0.173834	0.169309	0.0045246	2.67238	0.7	1	0.0384691	0.132702	0.0928916	0.091477	0.00141467	1.54648	0.7	1	0.032999	0.113833	0.0796831	0.0793917	0.000291403	0.367045	0.7	1	0.0545522	0.188182	0.131728	0.138431	0.00670311	4.84221
			2	0.525816	1.81385	1.26969					2	0.197784	0.682271	0.47759					2	0.0682421	0.235407	0.164785					2	0.0372974	0.12866	0.0900623					2	0.0327577	0.113	0.0791003					2	0.0601041	0.207334	0.145134
			1	0.689729	2.09472	1.46631	1.50334	0.0370329	2.46338		1	0.291647	0.885739	0.620017	0.610361	0.00965608	1.58203		1	0.0710692	0.215839	0.151087	0.15567	0.00458335	2.94427		1	0.0521956	0.158519	0.110963	0.110145	0.000818205	0.742843		1	0.0486491	0.147749	0.103424	0.102994	0.00042971	0.417217		1	0.0690577	0.20973	0.146811	0.144089	0.00272125	1.88859
			2	0.724569	2.20053	1.54037					2	0.282563	0.85815	0.600705					2	0.075381	0.228934	0.160254					2	0.0514258	0.156181	0.109327					2	0.0482449	0.146521	0.102565					2	0.0664976	0.201955	0.141368
			1	0.452679	1.59833	1.11883	1.11254	0.00629249	0.565597		1	0.0734765	0.259432	0.181603	0.211935	0.030332	14.312		1	0.04174	0.147376	0.103164	0.0877421	0.0154214	17.5758		1	0.0176633	0.0623659	0.0436561	0.0551738	0.0115176	20.8752		1	0.0439274	0.1551	0.10857	0.111451	0.00288127	2.58523		1	0.0646222	0.22817	0.159719	0.15287	0.00684863	4.48003
			2	0.447587	1.58035	1.10625					2	0.0980211	0.346095	0.242267					2	0.029261	0.103315	0.0723207					2	0.0269833	0.0952734	0.0666914					2	0.046259	0.163332	0.114333					2	0.0590803	0.208602	0.146021
			1	0.0717954	0.214853	0.150397	0.148441	0.00195621	1.31784		1	0.0257888	0.0771751	0.0540226	0.0557762	0.00175355	3.14391		1	0.018843	0.0563891	0.0394724	0.0384928	0.000979526	2.5447		1	0.04168	0.124731	0.0873115	0.0864921	0.00081933	0.947288		1	0.0368215	0.110191	0.0771338	0.078075	0.000941109	1.20539		1	0.0392423	0.117436	0.082205	0.0825841	0.000379119	0.45907
			2	0.0699277	0.209264	0.146485					2	0.027463	0.0821853	0.0575297					2	0.0179078	0.0535904	0.0375133					2	0.0408977	0.12239	0.0856728					2	0.03772	0.11288	0.0790161					2	0.0396043	0.118519	0.0829632
Sum LDH activity [U/g skin]		4.2459								1.28975								0.412722								0.256796								0.293837								0.43539
Mean LDH activity [U/gskin]		1.4153								0.429918								0.137574								0.0855986								0.0979457								0.14513
SD [U/g skin]		0.220242								0.164809								0.0356737								0.0228237								0.0135664								0.00594057
RSD [%]		15.5615								38.3349								25.9305								26.6636								13.8509								4.09327
		empty field=value out of linear range														days	0	1	2	3	4	5	6	7	8	9	10	11	12	13	14
															LDH [U/gskin]	S1	19.1223	0.452296	2.11018	0.128533	0.427756	2.11944	1.63002	0.467457	0.169309	0.091477	0.0793917	0.00670311	0.00221301	0.111792	0.0676243
																S2	10.9787	1.37233	1.68784	0.0652689	2.29591	0	1.50334	0.610361	0.15567	0.110145	0	0.00272125	0.000152398	0.0786641	0.0778395
																S3	17.2371	0.53866	3.0732	0.0995123	2.42265	3.71519	1.11254	0.211935	0.0877421	0.0551738	0.102994	0.00684863	0.00463319	0.114404	0.100649
																S4	0.0956154	0.0956154	0	0	0.0955461	0	0.148441	0.0557762	0.0384928	0.0864921	0	0.000379119	0.0011136	0.0814183	0.0798844
																mean	15.7794	0.787764	2.29041	0.0977714	1.71544	2.84216	1.4153	0.429918	0.137574	0.0855986	0.0979457	0.14513	0.131072	0.10162	0.0820375
																SD	3.48075	0.414855	0.579754	0.0258568	0.911997	0	0.220242	0.164809	0.0356737	0.0228237	0	0.00594057	0.00781952	0.0162673	0.013805
																sum	47.3381	2.36329	6.87122	0.293314	5.14631	8.6768	4.2459	1.28975	0.412722	0.256796	0.293837	0.43539	0.393217	0.30486	0.246112
		summe means	0	1	2	3	4	5	6	7
			47.3381	2.36329	6.87122	0.293314	5.14631	8.6768	4.2459	1.28975
				8	9	10	11	12	13	14
				0.412722	0.256796	0.293837	0.43539	0.393217	0.30486	0.246112
		Summe insg.	78.5676
[truncated: 24 more columns]

## Sheet: human S1
Time point		t0 Monday								t1								t2								t3								t4								t5
Date
Time of cultivation [days]		0								1								2								3								4								7
Skin sample	Weight of punch [g]	Vol. Medium [mL]	Measur. Nr.	LDH activity [U/mL]	LDH activity [U/mL/gskin]	LDH activity [U/gskin]	Mean LDH activity [U/gskin]	SD [U/gskin]	RSD [%]	Vol. Medium [mL]	Measur. Nr.	LDH activity [U/mL]	LDH activity [U/mL/gskin]	LDH activity [U/gskin]	Mean LDH activity [U/gskin]	SD [U/gskin]	RSD [%]	Vol. Medium [mL]	Measur. Nr.	LDH activity [U/mL]	LDH activity [U/mL/gskin]	LDH activity [U/gskin]	Mean LDH activity [U/gskin]	SD [U/gskin]	RSD [%]	Vol. Medium [mL]	Measur. Nr.	LDH activity [U/mL]	LDH activity [U/mL/gskin]	LDH activity [U/gskin]	Mean LDH activity [U/gskin]	SD [U/gskin]	RSD [%]	Vol. Medium [mL]	Measur. Nr.	LDH activity [U/mL]	LDH activity [U/mL/gskin]	LDH activity [U/gskin]	Mean LDH activity [U/gskin]	SD [U/gskin]	RSD [%]	Vol. Medium [mL]	Measur. Nr.	LDH activity [U/mL]	LDH activity [U/mL/gskin]	LDH activity [U/gskin]	Mean LDH activity [U/gskin]	SD [U/gskin]	RSD [%]
S1	0.321	0.7	1	0.830699	2.83844	1.98691	4.84546	2.85855	58.9944	0.7	1	3.67112	12.544	8.78079	8.19509	0.585699	7.14695	0.7	1	2.543	8.68927	6.08249	6.0419	0.0405937	0.671871	0.7	1	2.59903	8.8807	6.21649	6.50324	0.286747	4.4093	0.7	1	1.71589	5.86309	4.10416	3.12386	0.980306	31.3813	0.7	1	0.0311452	0.106421	0.0744947	0.0732955	0.00119921	1.63613
			2	3.22093	11.0057	7.704					2	3.18138	10.8706	7.6094					2	2.50906	8.57329	6.0013					2	2.8388	9.69998	6.78999					2	0.896188	3.06222	2.14355					2	0.0301424	0.102995	0.0720963
S2	0.297		1	10.863	34.5702	24.1991	24.2801	0.0809632	0.333455		1	0.3866	1.23031	0.861217	0.810437	0.0507793	6.26566		1	1.89688	6.03658	4.22561	4.69713	0.471524	10.0386		1	2.15615	6.8617	4.80319	4.81299	0.0097935	0.203481		1	0.594512	1.89197	1.32438	1.33333	0.0089506	0.671298		1	0.0232316	0.0739318	0.0517522	0.053295	0.00154272	2.89469
			2	10.9357	34.8015	24.3611					2	0.341011	1.08523	0.759658					2	2.32021	7.3838	5.16866					2	2.16495	6.88969	4.82278					2	0.602548	1.91754	1.34228					2	0.0246166	0.0783396	0.0548377
S3	0.302		1	0.759559	2.68187	1.87731	1.76871	0.108599	6.14002		1	0.27306	0.964128	0.67489	0.660281	0.014609	2.21255		1	1.61604	5.70594	3.99416	4.962	0.967844	19.5051		1	1.88122	6.64226	4.64958	4.16791	0.481668	11.5566		1	0.644655	2.27616	1.59332	1.7161	0.122783	7.15479		1	0.0416406	0.147026	0.102918	0.103187	0.000268588	0.260293
			2	0.671681	2.37159	1.66011					2	0.261239	0.922388	0.645672					2	2.39922	8.47121	5.92985					2	1.49146	5.26607	3.68625					2	0.744011	2.62697	1.83888					2	0.041858	0.147793	0.103455
S4	0.328		1	0.0345285	0.103329	0.0723305	0.0590444	0.0132861	22.5019		1		0	0	0	0	#DIV/0!		1		0	0	0	0	#DIV/0!		1		0	0	0	0	#DIV/0!		1		0	0	0	0	#DIV/0!		1		0	0	0	0	#DIV/0!
			2	0.0218437	0.0653689	0.0457582					2		0	0					2		0	0					2		0	0					2		0	0					2		0	0
Sum LDH activity [U/g skin]		30.8943								9.66581								15.701								15.4841								6.17328								0.229777
Mean LDH activity [U/gskin]		10.2981								3.22194								5.23368								5.16138								2.05776								0.0765924
SD [U/g skin]		9.96624								3.51709								0.581637								0.984706								0.769871								0.0205011
RSD [%]		96.7776								109.161								11.1134								19.0783								37.413								26.7666
		t6								t7								t8								t9								t10								t11
		8								9								10								11								14
		Vol. Medium [mL]	Measur. Nr.	LDH activity [U/mL]	LDH activity [U/mL/gskin]	LDH activity [U/gskin]	Mean LDH activity [U/gskin]	SD [U/gskin]	RSD [%]	Vol. Medium [mL]	Measur. Nr.	LDH activity [U/mL]	LDH activity [U/mL/gskin]	LDH activity [U/gskin]	Mean LDH activity [U/gskin]	SD [U/gskin]	RSD [%]	Vol. Medium [mL]	Measur. Nr.	LDH activity [U/mL]	LDH activity [U/mL/gskin]	LDH activity [U/gskin]	Mean LDH activity [U/gskin]	SD [U/gskin]	RSD [%]	Vol. Medium [mL]	Measur. Nr.	LDH activity [U/mL]	LDH activity [U/mL/gskin]	LDH activity [U/gskin]	Mean LDH activity [U/gskin]	SD [U/gskin]	RSD [%]	Vol. Medium [mL]	Measur. Nr.	LDH activity [U/mL]	LDH activity [U/mL/gskin]	LDH activity [U/gskin]	Mean LDH activity [U/gskin]	SD [U/gskin]	RSD [%]	Vol. Medium [mL]	Measur. Nr.	LDH activity [U/mL]	LDH activity [U/mL/gskin]	LDH activity [U/gskin]	Mean LDH activity [U/gskin]	SD [U/gskin]	RSD [%]
		0.7	1	0.0247455	0.0845536	0.0591875	0.0589377	0.000249828	0.423886	0.7	1		0	0	0	0	#DIV/0!	0.7	1	0.0490844	0.167718	0.117403	0.117403	0	0	0.7	1		0	0	0	0	#DIV/0!	0.7	1		0	0	0	0	#DIV/0!	0.7	1		0	0	0	0	#DIV/0!
			2	0.0245366	0.0838398	0.0586879					2		0	0					2		0	0					2		0	0					2		0	0					2		0	0
			1	0.0231858	0.0737861	0.0516503	0.0528677	0.00121741	2.30276		1		0	0	0	0	#DIV/0!		1		0	0	0	0	#DIV/0!		1		0	0	0	0	#DIV/0!		1		0	0	0	0	#DIV/0!		1		0	0	0	0	#DIV/0!
			2	0.0242788	0.0772644	0.0540851					2		0	0					2		0	0					2		0	0					2		0	0					2		0	0
			1	0.023058	0.0814137	0.0569896	0.0587574	0.00176777	3.00859		1		0	0	0	0	#DIV/0!		1		0	0	0	0	#DIV/0!		1		0	0	0	0	#DIV/0!		1		0	0	0	0	#DIV/0!		1		0	0	0	0	#DIV/0!
			2	0.0244885	0.0864645	0.0605251					2		0	0					2		0	0					2		0	0					2		0	0					2		0	0
			1		0	0	0	0	#DIV/0!		1		0	0	0	0	#DIV/0!		1		0	0	0	0	#DIV/0!		1		0	0	0	0	#DIV/0!		1		0	0	0	0	#DIV/0!		1		0	0	0	0	#DIV/0!
			2		0	0					2		0	0					2		0	0					2		0	0					2		0	0					2		0	0
Sum LDH activity [U/g skin]		0.170563								0								0.117403								0								0								0
Mean LDH activity [U/gskin]		0.0568543								0								0.117403								0								0								0
SD [U/g skin]		0.00281989								0								0								0								0								0
RSD [%]		4.95986								#DIV/0!								0								#DIV/0!								#DIV/0!								#DIV/0!
		empty field=value out of linear range													days	0	1	2	3	4	5	6	7	8	9	10	11	12	13	14
														LDH [U/gskin]	S1	4.84546	8.19509	6.0419	6.50324	3.12386	0.0732955	0.0589377	0	0.117403	0	0	0	0	0	0
															S2	24.2801	0.810437	4.69713	4.81299	1.33333	0	0.0528677	0	0	0	0	0	0	0	0
															S3	1.76871	0.660281	4.962	4.16791	1.7161	0.053295	0.0587574	0	0	0	0	0	0	0	0
															S4	0.0590444	0	0	0	0	0	0	0	0	0	0	0	0	0	0.0469136
															mean	10.2981	3.22194	5.23368	5.16138	2.05776	0.103187	0.0568543	0	0.117403	0	0	0	0	0	0.0469136
															SD	9.96624	3.51709	0.581637	0.984706	0.769871	0	0.00281989	0	0	0	0	0	0	0	0
															sum	30.8943	9.66581	15.701	15.4841	6.17328	0.229777	0.170563	0	0.117403	0	0	0	0	0	0
[truncated: 24 more columns]

## Sheet: human S2
Time point		t0								t1								t2								t3								t4								t5
Date
Time of cultivation [days]																																		4								7
Skin sample	Weight of punch [g]	Vol. Medium [mL]	Measur. Nr.	LDH activity [U/mL]	LDH activity [U/mL/gskin]	LDH activity [U/gskin]	Mean LDH activity [U/gskin]	SD [U/gskin]	RSD [%]	Vol. Medium [mL]	Measur. Nr.	LDH activity [U/mL]	LDH activity [U/mL/gskin]	LDH activity [U/gskin]	Mean LDH activity [U/gskin]	SD [U/gskin]	RSD [%]	Vol. Medium [mL]	Measur. Nr.	LDH activity [U/mL]	LDH activity [U/mL/gskin]	LDH activity [U/gskin]	Mean LDH activity [U/gskin]	SD [U/gskin]	RSD [%]	Vol. Medium [mL]	Measur. Nr.	LDH activity [U/mL]	LDH activity [U/mL/gskin]	LDH activity [U/gskin]	Mean LDH activity [U/gskin]	SD [U/gskin]	RSD [%]	Vol. Medium [mL]	Measur. Nr.	LDH activity [U/mL]	LDH activity [U/mL/gskin]	LDH activity [U/gskin]	Mean LDH activity [U/gskin]	SD [U/gskin]	RSD [%]	Vol. Medium [mL]	Measur. Nr.	LDH activity [U/mL]	LDH activity [U/mL/gskin]	LDH activity [U/gskin]	Mean LDH activity [U/gskin]	SD [U/gskin]	RSD [%]
S1	0.29	0.7	1	13.0146	44.8949	31.4264	26.8628	4.56358	16.9884	0.7	1	0.223457	0.770835	0.539585	0.655891	0.116306	17.7326	0.7	1	0.852274	2.93999	2.05799	2.21699	0.158993	7.17159	0.7	1	0.801749	2.7657	1.93599	1.93488	0.00110837	0.0572836	0.7	1	0.247358	0.853282	0.597297	0.600943	0.00364558	0.606643	0.7	1	0.216094	0.745433	0.521803	0.533912	0.012109	2.26798
			2	9.23476	31.8561	22.2993					2	0.319789	1.10314	0.772197					2	0.983961	3.39426	2.37598					2	0.800831	2.76253	1.93377					2	0.250377	0.863698	0.604588					2	0.226123	0.78003	0.546021
S2	0.331		1	5.73116	17.4057	12.184	12.4776	0.293607	2.35308		1	0.194864	0.591807	0.414265	0.455003	0.0407389	8.95354		1	0.80566	2.44681	1.71276	1.69942	0.0133485	0.785473		1	0.817576	2.48299	1.7381	1.75798	0.0198873	1.13126		1	0.271087	0.823296	0.576307	0.56718	0.00912727	1.60924		1	0.247164	0.750641	0.525449	0.521558	0.00389064	0.745965
			2	6.00738	18.2445	12.7712					2	0.23319	0.708203	0.495742					2	0.793102	2.40867	1.68607					2	0.836285	2.53982	1.77787					2	0.2625	0.797218	0.558053					2	0.243503	0.739525	0.517667
S3	0.326		1	4.81528	17.0019	11.9013	10.8054	1.0959	10.1421		1	0.224192	0.791583	0.554108	0.628933	0.0748243	11.897		1	0.864444	3.0522	2.13654	2.09833	0.0382072	1.82084		1	0.645684	2.2798	1.59586	1.6157	0.0198379	1.22783		1	0.26445	0.933727	0.653609	0.656064	0.00245474	0.374162		1	0.320759	1.13254	0.79278	0.763654	0.029126	3.81404
			2	3.92848	13.8708	9.70954					2	0.28474	1.00537	0.703757					2	0.833526	2.94304	2.06012					2	0.661737	2.33648	1.63553					2	0.266437	0.940741	0.658519					2	0.29719	1.04933	0.734528
S4	0.282		1	0.0258976	0.0775006	0.0542504	0.0271252	0.0271252	100		1		0	0	0	0	#DIV/0!		1		0	0	0	0	#DIV/0!		1		0	0	0	0	#DIV/0!		1		0	0	0	0	#DIV/0!		1	0.0191775	0.0573901	0.0401731	0.0399056	0.00026743	0.670155
			2		0	0					2		0	0					2		0	0					2		0	0					2		0	0					2	0.0189221	0.056626	0.0396382
Sum LDH activity [U/g skin]		50.1458								1.73983								6.01473								5.30856								1.82419								1.81912
Mean LDH activity [U/gskin]		16.7153								0.579942								2.00491								1.76952								0.608062								0.606375
SD [U/g skin]		7.2078								0.0890281								0.221382								0.130562								0.0366343								0.111327
RSD [%]		43.121								15.3512								11.042								7.3784								6.02476								18.3595
		t6								t7								t8								t9								t10								t11
		8								9								10								11								14
		Vol. Medium [mL]	Measur. Nr.	LDH activity [U/mL]	LDH activity [U/mL/gskin]	LDH activity [U/gskin]	Mean LDH activity [U/gskin]	SD [U/gskin]	RSD [%]	Vol. Medium [mL]	Measur. Nr.	LDH activity [U/mL]	LDH activity [U/mL/gskin]	LDH activity [U/gskin]	Mean LDH activity [U/gskin]	SD [U/gskin]	RSD [%]	Vol. Medium [mL]	Measur. Nr.	LDH activity [U/mL]	LDH activity [U/mL/gskin]	LDH activity [U/gskin]	Mean LDH activity [U/gskin]	SD [U/gskin]	RSD [%]	Vol. Medium [mL]	Measur. Nr.	LDH activity [U/mL]	LDH activity [U/mL/gskin]	LDH activity [U/gskin]	Mean LDH activity [U/gskin]	SD [U/gskin]	RSD [%]	Vol. Medium [mL]	Measur. Nr.	LDH activity [U/mL]	LDH activity [U/mL/gskin]	LDH activity [U/gskin]	Mean LDH activity [U/gskin]	SD [U/gskin]	RSD [%]	Vol. Medium [mL]	Measur. Nr.	LDH activity [U/mL]	LDH activity [U/mL/gskin]	LDH activity [U/gskin]	Mean LDH activity [U/gskin]	SD [U/gskin]	RSD [%]
		0.7	1	0.207837	0.716951	0.501865	0.518089	0.0162234	3.13139	0.7	1	0.181567	0.626331	0.438432	0.425865	0.0125664	2.9508	0.7	1	0.0488312	0.168447	0.117913	0.157338	0.0394244	25.0572	0.7	1	0.0704171	0.24291	0.170037	0.171489	0.00145225	0.846845	0.7	1	0.0732856	0.252805	0.176963	0.17707	0.000106488	0.0601391	0.7	1	0.0844871	0.291445	0.204012	0.204951	0.000938901	0.458111
			2	0.221274	0.763303	0.534312					2	0.171159	0.590427	0.413299					2	0.0814847	0.281089	0.196762					2	0.07162	0.247059	0.172941					2	0.0733738	0.253109	0.177176					2	0.0852647	0.294128	0.205889
			1	0.268288	0.814796	0.570358	0.589867	0.0195096	3.30746		1	0.201136	0.610854	0.427597	0.423674	0.00392372	0.926118		1	0.0611625	0.185752	0.130026	0.134366	0.00433956	3.22967		1	0.0597033	0.18132	0.126924	0.127885	0.00096052	0.751083		1	0.0568021	0.172509	0.120756	0.125076	0.00431979	3.45372		1	0.0640723	0.194589	0.136212	0.135493	0.000719832	0.531271
			2	0.286642	0.870538	0.609377					2	0.197444	0.599643	0.41975					2	0.065245	0.19815	0.138705					2	0.0606069	0.184065	0.128845					2	0.060866	0.184851	0.129396					2	0.0633951	0.192532	0.134773
			1	0.152588	0.538762	0.377133	0.386405	0.00927122	2.39935		1	0.181567	0.641081	0.448757	0.435895	0.0128624	2.9508		1	0.0764982	0.270102	0.189071	0.187273	0.00179844	0.960331		1	0.0705573	0.249126	0.174388	0.176822	0.00243403	1.37654		1	0.0617325	0.217966	0.152577	0.155013	0.00243638	1.57173		1	0.0593087	0.209409	0.146586	0.14533	0.0012561	0.864312
			2	0.16009	0.565251	0.395676					2	0.171159	0.604332	0.423032					2	0.0750429	0.264963	0.185474					2	0.0725269	0.25608	0.179256					2	0.063704	0.224928	0.157449					2	0.0582922	0.20582	0.144074
			1	0.0192344	0.0575603	0.0402922	0.0396426	0.000649666	1.63881		1	0.017568	0.0525735	0.0368014	0.0391044	0.00230296	5.88927		1	0.0179352	0.0536724	0.0375707	0.037784	0.000213352	0.564661		1		0	0	0	0	#DIV/0!		1		0	0	0	0	#DIV/0!		1		0	0	0	0	#DIV/0!
			2	0.0186141	0.0557041	0.0389929					2	0.0197667	0.0591534	0.0414074					2	0.0181389	0.054282	0.0379974					2		0	0					2		0	0					2		0	0
Sum LDH activity [U/g skin]		1.49436								1.28543								0.478976								0.476196								0.457159								0.485773
Mean LDH activity [U/gskin]		0.49812								0.428478								0.159659								0.158732								0.152386								0.161924
SD [U/g skin]		0.0842549								0.00532016								0.0216615								0.0219207								0.0213074								0.0306881
RSD [%]		16.9146								1.24164								13.5674								13.8099								13.9825								18.9521
		empty field=value out of linear range														days	0	1	2	3	4	5	6	7	8	9	10	11	12	13	14
															LDH [U/gskin]	S1	26.8628	0.655891	2.21699	1.93488	0.600943	0.533912	0.518089	0.425865	0.157338	0.171489	0	0.204951	0.236179	0.258382	0.183133
																S2	12.4776	0.455003	1.69942	1.75798	0.56718	0	0.589867	0.423674	0.134366	0.127885	0	0.135493	0.184909	0.185281	0.134586
																S3	10.8054	0.628933	2.09833	1.6157	0.656064	0.521558	0.386405	0.435895	0.187273	0.176822	0	0.14533	0.175703	0.153635	0.149221
																S4	0.0271252	0	0	0	0	0	0.0396426	0.0391044	0.037784	0	0	0	0.042364	0.0513603	0.0869982
																mean	16.7153	0.579942	2.00491	1.76952	0.608062	0.763654	0.49812	0.428478	0.159659	0.158732	0	0.161924	0.19893	0.199099	0.155647
																SD	7.2078	0.0890281	0.221382	0.130562	0.0366343	0	0.0842549	0.00532016	0.0216615	0.0219207	0	0.0306881	0.0266054	0.0438652	0.0203334
																sum	50.1458	1.73983	6.01473	5.30856	1.82419	1.81912	1.49436	1.28543	0.478976	0.476196	0.457159	0.485773	0.596791	0.597298	0.46694
[truncated: 24 more columns]

## Sheet: porcine basic
Time point		t0								t1								t2								t3								t4								t5
Date
Time of cultivation [days]		0								1								2								3								4								7
Skin sample	Weight of punch [g]	Vol. Medium [mL]	Measur. Nr.	LDH activity [U/mL]	LDH activity [U/mL/gskin]	LDH activity [U/gskin]	Mean LDH activity [U/gskin]	SD [U/gskin]	RSD [%]	Vol. Medium [mL]	Measur. Nr.	LDH activity [U/mL]	LDH activity [U/mL/gskin]	LDH activity [U/gskin]	Mean LDH activity [U/gskin]	SD [U/gskin]	RSD [%]	Vol. Medium [mL]	Measur. Nr.	LDH activity [U/mL]	LDH activity [U/mL/gskin]	LDH activity [U/gskin]	Mean LDH activity [U/gskin]	SD [U/gskin]	RSD [%]	Vol. Medium [mL]	Measur. Nr.	LDH activity [U/mL]	LDH activity [U/mL/gskin]	LDH activity [U/gskin]	Mean LDH activity [U/gskin]	SD [U/gskin]	RSD [%]	Vol. Medium [mL]	Measur. Nr.	LDH activity [U/mL]	LDH activity [U/mL/gskin]	LDH activity [U/gskin]	Mean LDH activity [U/gskin]	SD [U/gskin]	RSD [%]	Vol. Medium [mL]	Measur. Nr.	LDH activity [U/mL]	LDH activity [U/mL/gskin]	LDH activity [U/gskin]	Mean LDH activity [U/gskin]	SD [U/gskin]	RSD [%]
S1	0.322	0.7	1	5.17521	17.8523	12.4966	13.7145	1.21788	8.88025	0.7	1	2.21369	7.63631	5.34542	5.13896	0.206457	4.01748	0.7	1		0	0	0	0	#DIV/0!	0.7	1		0	0	0	0	#DIV/0!	0.7	1		0	0	0	0	#DIV/0!	0.7	1		0	0	0	0	#DIV/0!
			2	6.18393	21.332	14.9324					2	2.04269	7.04643	4.9325					2		0	0					2		0	0					2		0	0					2		0	0
S2	0.35		1	6.66573	20.244	14.1708	13.0572	1.11354	8.52814		1	1.19628	3.63311	2.54318	2.65582	0.112637	4.24115		1	0.297701	0.249909	0.174937	0.174937	0	0		1	0.383001	1.16318	0.814228	0.814228	0	0		1	0.179088	0.543894	0.380725	0.602882	0.222157	36.8491		1	0.276441	0.839558	0.587691	0.517439	0.0702518	13.5768
			2	5.61815	17.0624	11.9437					2	1.30224	3.95493	2.76845					2	0.297701	0.249909	0.174937					2		0	0					2	0.388087	1.17863	0.82504					2	0.21035	0.638839	0.447187
S3	0.362		1	5.89745	20.8229	14.576	15.1131	0.537094	3.55383		1	2.11807	7.47852	5.23496	5.40273	0.167769	3.10526		1	0.334533	1.18118	0.826825	0.712595	0.11423	16.0301		1	0.207993	0.734386	0.514071	0.470058	0.0440123	9.36316		1	0.128935	0.455248	0.318674	0.330571	0.0118977	3.59912		1	0.184841	0.65264	0.456848	0.462245	0.00539711	1.16759
			2	6.33207	22.3574	15.6502					2	2.25382	7.95786	5.5705					2	0.242099	0.854808	0.598365					2	0.172378	0.608637	0.426046					2	0.138563	0.489241	0.342469					2	0.189208	0.66806	0.467642
S4	0.373		1	0.951	2.84594	1.99216	1.77325	0.218907	12.3449		1	0.302674	0.905776	0.634043	0.597927	0.0361157	6.04014		1	0.231138	0.6917	0.48419	0.551739	0.0675491	12.243		1	0.218516	0.653925	0.457748	0.482033	0.0242857	5.03817		1	0.0863553	0.258425	0.180898	0.180271	0.000626772	0.347684		1	0.0542485	0.162343	0.11364	0.115949	0.00230917	1.99154
			2	0.742	2.22049	1.55435					2	0.268193	0.802588	0.561812					2	0.29563	0.884697	0.619288					2	0.241702	0.723313	0.506319					2	0.0857569	0.256634	0.179644					2	0.0564531	0.16894	0.118258
Sum LDH activity [U/g skin]		41.8848								13.1975								0.887532								1.28429								0.933454								0.979684
Mean LDH activity [U/gskin]		13.9616								4.39917								0.665649								0.963215								0.70009								0.734763
SD [U/g skin]		0.8573								1.23743								0.268829								0.172085								0.136156								0.027597
RSD [%]		6.14041								28.1287								40.3861								17.8657								19.4483								3.7559
		t6								t7								t8								t9								t10								t11
		8								9								10								11								14
		Vol. Medium [mL]	Measur. Nr.	LDH activity [U/mL]	LDH activity [U/mL/gskin]	LDH activity [U/gskin]	Mean LDH activity [U/gskin]	SD [U/gskin]	RSD [%]	Vol. Medium [mL]	Measur. Nr.	LDH activity [U/mL]	LDH activity [U/mL/gskin]	LDH activity [U/gskin]	Mean LDH activity [U/gskin]	SD [U/gskin]	RSD [%]	Vol. Medium [mL]	Measur. Nr.	LDH activity [U/mL]	LDH activity [U/mL/gskin]	LDH activity [U/gskin]	Mean LDH activity [U/gskin]	SD [U/gskin]	RSD [%]	Vol. Medium [mL]	Measur. Nr.	LDH activity [U/mL]	LDH activity [U/mL/gskin]	LDH activity [U/gskin]	Mean LDH activity [U/gskin]	SD [U/gskin]	RSD [%]	Vol. Medium [mL]	Measur. Nr.	LDH activity [U/mL]	LDH activity [U/mL/gskin]	LDH activity [U/gskin]	Mean LDH activity [U/gskin]	SD [U/gskin]	RSD [%]	Vol. Medium [mL]	Measur. Nr.	LDH activity [U/mL]	LDH activity [U/mL/gskin]	LDH activity [U/gskin]	Mean LDH activity [U/gskin]	SD [U/gskin]	RSD [%]
		0.7	1		0	0	0	0	#DIV/0!	0.7	1		0	0	0	0	#DIV/0!	0.7	1		0	0	0	0	#DIV/0!	0.7	1		0	0	0	0	#DIV/0!	0.7	1		0	0	0	0	#DIV/0!	0.7	1		0	0	0	0	#DIV/0!
			2		0	0					2		0	0					2		0	0					2		0	0					2		0	0					2		0	0
			1	0.137936	0.418913	0.293239	0.292339	0.000900154	0.307914		1	0.0535374	0.162594	0.113816	0.110377	0.00343932	3.11599		1	0.0231955	0.0704451	0.0493116	0.0463297	0.00298182	6.43609		1	0.0321856	0.0977485	0.0684239	0.0700202	0.00159627	2.27972		1	0.0533507	0.162027	0.113419	0.114622	0.00120277	1.04933		1	0.0356761	0.108349	0.0758443	0.0728245	0.00301974	4.1466
			2	0.137089	0.416341	0.291439					2	0.0503018	0.152768	0.106937					2	0.0203902	0.0619256	0.0433479					2	0.0336874	0.102309	0.0716165					2	0.0544822	0.165464	0.115824					2	0.0328352	0.0997212	0.0698048
			1	0.0682777	0.241076	0.168754	0.171639	0.00288524	1.681		1	0.0897428	0.316866	0.221806	0.220177	0.00162926	0.739978		1	0.0701196	0.24758	0.173306	0.173314	7.8926e-06	0.00455393		1	0.0700988	0.247507	0.173255	0.179777	0.0065228	3.62826		1	0.059557	0.210285	0.1472	0.146669	0.000530473	0.36168		1	0.0504206	0.178026	0.124619	0.126097	0.0014781	1.1722
			2	0.0706124	0.24932	0.174524					2	0.0884244	0.312211	0.218548					2	0.070126	0.247603	0.173322					2	0.0753771	0.266143	0.1863					2	0.0591278	0.20877	0.146139					2	0.0516167	0.18225	0.127575
			1	0.0423218	0.126651	0.088656	0.0892544	0.000598375	0.670416		1	0.052621	0.157473	0.110231	0.112502	0.00227077	2.01844		1	0.0476108	0.142479	0.0997353	0.100991	0.00125615	1.24382		1	0.0793177	0.237364	0.166155	0.159597	0.00655778	4.10895		1	0.0778681	0.233026	0.163118	0.168826	0.00570712	3.38048		1	0.0865683	0.259062	0.181344	0.177141	0.00420283	2.37259
			2	0.0428931	0.128361	0.0898528					2	0.054789	0.16396	0.114772					2	0.0488101	0.146068	0.102248					2	0.0730567	0.218628	0.15304					2	0.0833169	0.249332	0.174533					2	0.0825557	0.247054	0.172938
Sum LDH activity [U/g skin]		0.463978								0.330553								0.219644								0.249798								0.261291								0.198921
Mean LDH activity [U/gskin]		0.347983								0.247915								0.164733								0.187348								0.195968								0.149191
SD [U/g skin]		0.0603502								0.0549001								0.0634921								0.0548786								0.0160238								0.026636
RSD [%]		17.3428								22.1447								38.5425								29.2923								8.17674								17.8537
		empty field=value out of linear range													days	0	1	2	3	4	5	6	7	8	9	10	11	12	13	14
														LDH [U/gskin]	S1	13.7145	5.13896	0	0	0	0	0	0	0	0	0	0	0	0	0
															S2	13.0572	2.65582	0.174937	0.814228	0.602882	0	0.292339	0.110377	0.0463297	0.0700202	0	0.0728245	0.08695	0.128364	0.113312
															S3	15.1131	5.40273	0.712595	0.470058	0.330571	0.517439	0.171639	0.220177	0.173314	0.179777	0	0.126097	0.119743	0.123641	0.163248
															S4	1.77325	0.597927	0.551739	0.482033	0.180271	0	0.0892544	0.112502	0.100991	0.159597	0	0.177141	0.135622	0.166782	0.125141
															mean	13.9616	4.39917	0.665649	0.963215	0.70009	0.462245	0.347983	0.247915	0.164733	0.187348	0.195968	0.149191	0.15502	0.189004	0.20742
															SD	0.8573	1.23743	0.268829	0.172085	0.136156	0	0.0603502	0.0549001	0.0634921	0.0548786	0.0160238	0.026636	0.0163966	0.00236111	0.0249683
															sum	41.8848	13.1975	0.887532	1.28429	0.933454	0.979684	0.463978	0.330553	0.219644	0.249798	0.261291	0.198921	0.206693	0.252005	0.27656
[truncated: 24 more columns]

## Sheet: porcine S1
Time point		t0 Monday								t1								t2								t3								t4								t5
Date
Time of cultivation [days]		0								1								2								3								4								7
Skin sample	Weight of punch [g]	Vol. Medium [mL]	Measur. Nr.	LDH activity [U/mL]	LDH activity [U/mL/gskin]	LDH activity [U/gskin]	Mean LDH activity [U/gskin]	SD [U/gskin]	RSD [%]	Vol. Medium [mL]	Measur. Nr.	LDH activity [U/mL]	LDH activity [U/mL/gskin]	LDH activity [U/gskin]	Mean LDH activity [U/gskin]	SD [U/gskin]	RSD [%]	Vol. Medium [mL]	Measur. Nr.	LDH activity [U/mL]	LDH activity [U/mL/gskin]	LDH activity [U/gskin]	Mean LDH activity [U/gskin]	SD [U/gskin]	RSD [%]	Vol. Medium [mL]	Measur. Nr.	LDH activity [U/mL]	LDH activity [U/mL/gskin]	LDH activity [U/gskin]	Mean LDH activity [U/gskin]	SD [U/gskin]	RSD [%]	Vol. Medium [mL]	Measur. Nr.	LDH activity [U/mL]	LDH activity [U/mL/gskin]	LDH activity [U/gskin]	Mean LDH activity [U/gskin]	SD [U/gskin]	RSD [%]	Vol. Medium [mL]	Measur. Nr.	LDH activity [U/mL]	LDH activity [U/mL/gskin]	LDH activity [U/gskin]	Mean LDH activity [U/gskin]	SD [U/gskin]	RSD [%]
S1	0.368	0.7	1	6.30286	21.7422	15.2196	15.8351	0.615481	3.88683	0.7	1	0.546463	1.88507	1.31955	1.49079	0.17124	11.4865	0.7	1	0.333994	1.15214	0.8065	0.790993	0.0155065	1.96038	0.7	1	0.247088	0.852349	0.596645	0.579279	0.0173657	2.9978	0.7	1	0.260958	0.900198	0.630138	0.624074	0.00606446	0.971754	0.7	1	0.0579604	0.199939	0.139958	0.142084	0.00212626	1.49648
			2	6.81264	23.5008	16.4505					2	0.688293	2.37433	1.66203					2	0.321151	1.10784	0.775487					2	0.232704	0.802733	0.561913					2	0.255935	0.882871	0.61801					2	0.0597215	0.206014	0.14421
S2	0.345		1	5.34229	16.2246	11.3573	10.7481	0.609112	5.66714		1	3.13402	9.51808	6.66266	6.39233	0.270327	4.22893		1	0.511857	1.55452	1.08817	1.08695	0.00121742	0.112003		1	0.630944	1.91619	1.34133	1.26639	0.0749408	5.91766		1	0.187863	0.570545	0.399381	0.396526	0.00285508	0.720022		1	0.107576	0.326712	0.228698	0.231227	0.002529	1.09373
			2	4.76925	14.4843	10.139					2	2.8797	8.74572	6.12201					2	0.510712	1.55104	1.08573					2	0.560442	1.70207	1.19145					2	0.185177	0.562387	0.393671					2	0.109956	0.333937	0.233756
S3	0.339		1	6.65293	23.4903	16.4432	15.8601	0.583123	3.67667		1	2.33713	8.252	5.7764	5.74583	0.0305745	0.532117		1	0.510035	1.80085	1.26059	1.28194	0.0213499	1.66544		1	0.312271	1.10257	0.771802	0.741128	0.0306742	4.13886		1	0.222271	0.784799	0.549359	0.490156	0.059203	12.0784		1	0.0475293	0.167817	0.117472	0.116823	0.000648748	0.555323
			2	6.18106	21.8242	15.277					2	2.31239	8.16465	5.71525					2	0.527312	1.86185	1.30329					2	0.28745	1.01493	0.710454					2	0.174364	0.615648	0.430954					2	0.0470043	0.165964	0.116175
S4	0.319		1	0.278824	0.834403	0.584082	0.523815	0.060267	11.5054		1	0.416389	1.24608	0.872254	0.872359	0.000104969	0.0120327		1	0.377249	1.12895	0.790263	0.770609	0.0196537	2.55041		1	0.172292	0.515598	0.360919	0.35408	0.00683883	1.93144		1	0.242761	0.72648	0.508536	0.548836	0.0403	7.34281		1	0.0892992	0.267235	0.187064	0.188773	0.00170835	0.904976
			2	0.221285	0.662212	0.463548					2	0.41649	1.24638	0.872464					2	0.358485	1.07279	0.750956					2	0.165763	0.496059	0.347241					2	0.281237	0.841623	0.589136					2	0.0909302	0.272116	0.190481
Sum LDH activity [U/g skin]		42.4433								13.6289								3.15988								2.5868								1.51076								0.490134
Mean LDH activity [U/gskin]		14.1478								4.54298								1.05329								0.862266								0.503586								0.163378
SD [U/g skin]		2.40392								2.17431								0.201837								0.2933								0.09338								0.0490723
RSD [%]		16.9915								47.8608								19.1624								34.015								18.543								30.036
		t6								t7								t8								t9								t10								t11
		8								9								10								11								14
		Vol. Medium [mL]	Measur. Nr.	LDH activity [U/mL]	LDH activity [U/mL/gskin]	LDH activity [U/gskin]	Mean LDH activity [U/gskin]	SD [U/gskin]	RSD [%]	Vol. Medium [mL]	Measur. Nr.	LDH activity [U/mL]	LDH activity [U/mL/gskin]	LDH activity [U/gskin]	Mean LDH activity [U/gskin]	SD [U/gskin]	RSD [%]	Vol. Medium [mL]	Measur. Nr.	LDH activity [U/mL]	LDH activity [U/mL/gskin]	LDH activity [U/gskin]	Mean LDH activity [U/gskin]	SD [U/gskin]	RSD [%]	Vol. Medium [mL]	Measur. Nr.	LDH activity [U/mL]	LDH activity [U/mL/gskin]	LDH activity [U/gskin]	Mean LDH activity [U/gskin]	SD [U/gskin]	RSD [%]	Vol. Medium [mL]	Measur. Nr.	LDH activity [U/mL]	LDH activity [U/mL/gskin]	LDH activity [U/gskin]	Mean LDH activity [U/gskin]	SD [U/gskin]	RSD [%]	Vol. Medium [mL]	Measur. Nr.	LDH activity [U/mL]	LDH activity [U/mL/gskin]	LDH activity [U/gskin]	Mean LDH activity [U/gskin]	SD [U/gskin]	RSD [%]
		0.7	1	0.0334213	0.11529	0.0807027	0.0831078	0.00240505	2.8939	0.7	1	0.0352983	0.121764	0.0852351	0.085948	0.000712836	0.829381	0.7	1	0.0228794	0.0789243	0.055247	0.0511157	0.00413131	8.08228	0.7	1	0.0431298	0.14878	0.104146	0.102611	0.00153502	1.49597	0.7	1	0.0381886	0.131735	0.0922143	0.091573	0.000641315	0.700332	0.7	1	0.0442457	0.152629	0.106841	0.103439	0.00340116	3.28807
			2	0.0354133	0.122161	0.0855128					2	0.0358887	0.123801	0.0866608					2	0.0194576	0.0671205	0.0469844					2	0.0418584	0.144394	0.101076					2	0.0376574	0.129902	0.0909317					2	0.0414287	0.142912	0.100038
			1	0.0335358	0.101849	0.0712942	0.0723399	0.00104566	1.44548		1	0.0300822	0.0913602	0.0639522	0.0633856	0.000566542	0.893803		1		0	0	0	0	#DIV/0!		1		0	0	0	0	#DIV/0!		1		0	0	0	0	#DIV/0!		1	0.0185757	0.0564148	0.0394904	0.0450089	0.00551849	12.2609
			2	0.0345195	0.104836	0.0733855					2	0.0295492	0.0897415	0.0628191					2		0	0					2		0	0					2		0	0					2	0.0237674	0.072182	0.0505274
			1	0.0191034	0.0674508	0.0472155	0.0484575	0.00124194	2.56294		1		0	0	0	0	#DIV/0!		1		0	0	0	0	#DIV/0!		1		0	0	0	0	#DIV/0!		1		0	0	0	0	#DIV/0!		1		0	0	0	0	#DIV/0!
			2	0.0201084	0.0709992	0.0496994					2		0	0					2		0	0					2		0	0					2		0	0					2		0	0
			1	0.0225148	0.0673772	0.047164	0.0467982	0.000365824	0.781705		1	0.0204601	0.0612286	0.04286	0.0430792	0.000219206	0.508844		1		0	0	0	0	#DIV/0!		1	0.0194241	0.0581282	0.0406898	0.0403249	0.000364806	0.904666		1		0	0	0.0200998	0.0200998	100		1	0.0195195	0.0584137	0.0408896	0.0409919	0.00010232	0.24961
			2	0.0221655	0.066332	0.0464324					2	0.0206694	0.0618549	0.0432984					2		0	0					2	0.0190758	0.0570859	0.0399601					2	0.0191902	0.0574281	0.0401997					2	0.0196172	0.058706	0.0410942
Sum LDH activity [U/g skin]		0.203905								0.149334								0.0511157								0.102611								0.091573								0.148448
Mean LDH activity [U/gskin]		0.0679684								0.0746668								0.0511157								0.102611								0.091573								0.0742242
SD [U/g skin]		0.0144797								0.0112812								0								0								0								0.0292153
RSD [%]		21.3036								15.1087								0								0								0								39.3609
		empty field=value out of linear range													days	0	1	2	3	4	5	6	7	8	9	10	11	12	13	14
														LDH [U/gskin]	S1	15.8351	1.49079	0.790993	0.579279	0.624074	0.142084	0.0831078	0.085948	0.0511157	0.102611	0	0.103439	0.171798	0.115712	0.115549
															S2	10.7481	6.39233	1.08695	1.26639	0.396526	0.142084	0.0723399	0.0633856	0	0	0	0.0450089	0.0753936	0.0430009	0.0567162
															S3	15.8601	5.74583	1.28194	0.741128	0.490156	0.142084	0.0484575	0	0	0	0	0	0.118233	0	0
															S4	0.523815	0.872359	0.770609	0.35408	0.548836	0.142084	0.0467982	0.0430792	0	0.0403249	0	0.0409919	0.0388731	0.0401392	0.0574395
															mean	14.1478	4.54298	1.05329	0.862266	0.503586	0.142084	0.0679684	0.0746668	0.0511157	0.102611	0	0.0742242	0.121808	0.0793563	0.0861326
															SD	2.40392	2.17431	0.201837	0.2933	0.09338	0.142084	0.0144797	0.0112812	0	0	0	0.0292153	0.0394379	0.0363554	0.0294164
															sum	42.4433	13.6289	3.15988	2.5868	1.51076	0.490134	0.203905	0.149334	0.0511157	0.102611	0.091573	0.148448	0.365424	0.158713	0.172265
[truncated: 24 more columns]

## Sheet: porcine S2
Time point		t0 Monday								t1								t2								t3								t4								t5
Date
Time of cultivation [days]		0								1								2								3								4								7
Skin sample	Weight of punch [g]	Vol. Medium [mL]	Measur. Nr.	LDH activity [U/mL]	LDH activity [U/mL/gskin]	LDH activity [U/gskin]	Mean LDH activity [U/gskin]	SD [U/gskin]	RSD [%]	Vol. Medium [mL]	Measur. Nr.	LDH activity [U/mL]	LDH activity [U/mL/gskin]	LDH activity [U/gskin]	Mean LDH activity [U/gskin]	SD [U/gskin]	RSD [%]	Vol. Medium [mL]	Measur. Nr.	LDH activity [U/mL]	LDH activity [U/mL/gskin]	LDH activity [U/gskin]	Mean LDH activity [U/gskin]	SD [U/gskin]	RSD [%]	Vol. Medium [mL]	Measur. Nr.	LDH activity [U/mL]	LDH activity [U/mL/gskin]	LDH activity [U/gskin]	Mean LDH activity [U/gskin]	SD [U/gskin]	RSD [%]	Vol. Medium [mL]	Measur. Nr.	LDH activity [U/mL]	LDH activity [U/mL/gskin]	LDH activity [U/gskin]	Mean LDH activity [U/gskin]	SD [U/gskin]	RSD [%]	Vol. Medium [mL]	Measur. Nr.	LDH activity [U/mL]	LDH activity [U/mL/gskin]	LDH activity [U/gskin]	Mean LDH activity [U/gskin]	SD [U/gskin]	RSD [%]
S1	0.374	0.7	1	5.87022	20.2498	14.1749	16.5367	2.36182	14.2823	0.7	1	0.986411	3.40271	2.3819	2.76819	0.38629	13.9546	0.7	1	0.54559	1.88206	1.31744	1.3197	0.00225641	0.17098	0.7	1	0.203984	0.703659	0.492562	0.488268	0.00429334	0.879299	0.7	1	0.237026	0.817642	0.572349	0.581966	0.0096168	1.65247	0.7	1	0.0988794	0.341093	0.238765	0.238589	0.000175799	0.0736828
			2	7.82641	26.9979	18.8985					2	1.30636	4.50639	3.15447					2	0.547459	1.8885	1.32195					2	0.200428	0.691393	0.483975					2	0.244991	0.845118	0.591583					2	0.0987338	0.340591	0.238413
S2	0.349		1	4.84168	14.7043	10.293	9.38941	0.903595	9.62356		1	2.85906	8.68302	6.07811	6.6269	0.548781	8.28112		1	0.517474	0.77409	0.541863	0.541863	0	0		1	0.148125	0.44986	0.314902	0.332725	0.0178232	5.35673		1	0.291578	0.88553	0.619871	0.613732	0.00613941	1.00034		1	0.0681583	0.206998	0.144899	0.143583	0.00131598	0.91653
			2	3.9916	12.1226	8.48581					2	3.37534	10.251	7.17568					2	0.540709	0.77409	0.541863					2	0.164893	0.500784	0.350549					2	0.285803	0.867989	0.607592					2	0.0669203	0.203238	0.142267
S3	0.327		1	5.70099	20.1292	14.0904	11.597	2.49347	21.5011		1	0.48553	1.71432	1.20002	1.167	0.033024	2.82982		1	0.327822	1.15748	0.810238	0.864882	0.054644	6.31809		1	0.378453	1.33625	0.935376	0.926886	0.00849006	0.915976		1	0.152533	0.538566	0.376996	0.386841	0.00984528	2.54504		1	0.0820171	0.289588	0.202712	0.207336	0.0046248	2.23058
			2	3.68327	13.005	9.10349					2	0.458807	1.61997	1.13398					2	0.37204	1.31361	0.919526					2	0.371583	1.31199	0.918396					2	0.160499	0.566695	0.396686					2	0.0857595	0.302802	0.211961
S4	0.342		1	0.432611	1.29462	0.906236	0.873364	0.0328729	3.76394		1	0.714052	2.13686	1.4958	1.494	0.00179799	0.120347		1	0.177908	0.532405	0.372683	0.373927	0.0012437	0.332604		1	0.100436	0.300563	0.210394	0.345451	0.135057	39.0958		1	0.180909	0.541384	0.378969	0.382409	0.00344026	0.899629		1	0.108643	0.325122	0.227586	0.22751	7.57882e-05	0.033312
			2	0.401226	1.2007	0.840491					2	0.712336	2.13172	1.4922					2	0.179096	0.535958	0.375171					2	0.229381	0.68644	0.480508					2	0.184193	0.551213	0.385849					2	0.10857	0.324906	0.227434
Sum LDH activity [U/g skin]		37.523								10.5621								2.72644								1.74788								1.58254								0.589508
Mean LDH activity [U/gskin]		12.5077								3.52069								0.908814								0.582627								0.527513								0.196503
SD [U/g skin]		2.98808								2.29162								0.319065								0.251574								0.100312								0.0395355
RSD [%]		23.89								65.0901								35.1079								43.1793								19.016								20.1196
		t6								t7								t8								t9								t10								t11
		8								9								10								11								14
		Vol. Medium [mL]	Measur. Nr.	LDH activity [U/mL]	LDH activity [U/mL/gskin]	LDH activity [U/gskin]	Mean LDH activity [U/gskin]	SD [U/gskin]	RSD [%]	Vol. Medium [mL]	Measur. Nr.	LDH activity [U/mL]	LDH activity [U/mL/gskin]	LDH activity [U/gskin]	Mean LDH activity [U/gskin]	SD [U/gskin]	RSD [%]	Vol. Medium [mL]	Measur. Nr.	LDH activity [U/mL]	LDH activity [U/mL/gskin]	LDH activity [U/gskin]	Mean LDH activity [U/gskin]	SD [U/gskin]	RSD [%]	Vol. Medium [mL]	Measur. Nr.	LDH activity [U/mL]	LDH activity [U/mL/gskin]	LDH activity [U/gskin]	Mean LDH activity [U/gskin]	SD [U/gskin]	RSD [%]	Vol. Medium [mL]	Measur. Nr.	LDH activity [U/mL]	LDH activity [U/mL/gskin]	LDH activity [U/gskin]	Mean LDH activity [U/gskin]	SD [U/gskin]	RSD [%]	Vol. Medium [mL]	Measur. Nr.	LDH activity [U/mL]	LDH activity [U/mL/gskin]	LDH activity [U/gskin]	Mean LDH activity [U/gskin]	SD [U/gskin]	RSD [%]
		0.7	1	0.0216873	0.0748122	0.0523685	0.0538416	0.00147303	2.73586	0.7	1	0.0211157	0.0728403	0.0509882	0.052881	0.00189277	3.5793	0.7	1	0.0208834	0.072039	0.0504273	0.0508273	0.000400041	0.787059	0.7	1	0.0274497	0.0946899	0.066283	0.0713355	0.00505254	7.08278	0.7	1	0.0368174	0.127005	0.0889033	0.0929867	0.00408342	4.3914	0.7	1	0.0351747	0.121338	0.0849367	0.0918714	0.00693473	7.5483
			2	0.0229074	0.0790209	0.0553146					2	0.0226834	0.0782482	0.0547737					2	0.0212147	0.073182	0.0512274					2	0.0316345	0.109126	0.076388					2	0.0401995	0.138672	0.0970702					2	0.0409185	0.141152	0.0988062
			1	0.0258413	0.0784807	0.0549365	0.0554617	0.000525182	0.946928		1	0.0182984	0.0555725	0.0389008	0.0438501	0.00494936	11.287		1		0	0	0	0	#DIV/0!		1		0	0	0	0	#DIV/0!		1		0	0	0	0	#DIV/0!		1		0	0	0.0399872	0	0
			2	0.0263354	0.0799812	0.0559869					2	0.0229546	0.0697136	0.0487995					2		0	0					2		0	0					2		0	0					2	0.0188094	0.0571246	0.0399872
			1	0.0439582	0.155209	0.108646	0.111079	0.00243316	2.19047		1	0.0347657	0.122752	0.0859261	0.0857877	0.000138382	0.161308		1	0.0243609	0.0860142	0.06021	0.0591208	0.00108915	1.84224		1	0.0250854	0.088572	0.0620004	0.0668308	0.00483044	7.22787		1	0.0184457	0.0651284	0.0455899	0.0505372	0.00494731	9.78944		1	0.0213791	0.0754858	0.0528401	0.05658	0.0037399	6.60993
			2	0.0459271	0.162161	0.113512					2	0.0346537	0.122356	0.0856493					2	0.0234796	0.0829024	0.0580317					2	0.0289942	0.102373	0.0716613					2	0.022449	0.0792636	0.0554845					2	0.0244054	0.0861713	0.0603199
			1	0.06204	0.18566	0.129962	0.130452	0.000490041	0.375649		1	0.0452251	0.13534	0.0947378	0.0964937	0.00175585	1.81966		1	0.0239779	0.0717558	0.050229	0.0480939	0.00213513	4.4395		1	0.0242915	0.0726942	0.0508859	0.0612736	0.00272167	4.44183		1	0.0291561	0.087252	0.0610764	0.0748263	0.0137499	18.3757		1	0.0292061	0.0874015	0.061181	0.0623741	0.00119308	1.91277
			2	0.0625079	0.18706	0.130942					2	0.0469015	0.140356	0.0982495					2	0.0219394	0.0656554	0.0459588					2	0.02689	0.0804704	0.0563293					2	0.0422837	0.126537	0.0885761					2	0.0303452	0.0908103	0.0635672
Sum LDH activity [U/g skin]		0.220383								0.182519								0.109948								0.138166								0.143524								0.188439
Mean LDH activity [U/gskin]		0.0734609								0.0608396								0.0366494								0.0460554								0.0478413								0.0628129
SD [U/g skin]		0.0266085								0.0180221								0.0261353								0.032618								0.0380095								0.0216353
RSD [%]		36.2213								29.6224								71.3116								70.8233								79.4491								34.4441
		empty field=value out of linear range													days	0	1	2	3	4	5	6	7	8	9	10	11	12	13	14
														LDH [U/gskin]	S1	16.5367	2.76819	1.3197	0.488268	0.581966	0.238589	0.0538416	0.052881	0.0508273	0.0713355	0	0.0918714	0.125998	0.064487	0.128166
															S2	9.38941	6.6269	0.541863	0.332725	0.613732	0	0.0554617	0.0438501	0	0	0	0.0399872	0.0487172	0.0375974	0.0454237
															S3	11.597	1.167	0.864882	0.926886	0.386841	0.143583	0.111079	0.0857877	0.0591208	0.0668308	0	0.05658	0.0689843	0.0533125	0.0706748
															S4	0.873364	1.494	0.373927	0.345451	0.382409	0	0.130452	0.0964937	0.0480939	0.0612736	0	0.0623741	0.0608305	0.0587796	0.0553424
															mean	12.5077	3.52069	0.908814	0.582627	0.527513	0.207336	0.0734609	0.0608396	0.0366494	0.0460554	0	0.0628129	0.0812333	0.051799	0.0814215
															SD	2.98808	2.29162	0.319065	0.251574	0.100312	0	0.0266085	0.0180221	0.0261353	0.032618	0	0.0216353	0.0327171	0.0110297	0.0346235
															sum	37.523	10.5621	2.72644	1.74788	1.58254	0.589508	0.220383	0.182519	0.109948	0.138166	0.143524	0.188439	0.2437	0.155397	0.244264
[truncated: 24 more columns]

## Sheet: canine basic
Time point		t0 Monday								t1								t2								t3								t4								t5
Date
Time of cultivation [days]		0								1								2								3								4								7
Skin sample	Weight of punch [g]	Vol. Medium [mL]	Measur. Nr.	LDH activity [U/mL]	LDH activity [U/mL/gskin]	LDH activity [U/gskin]	Mean LDH activity [U/gskin]	SD [U/gskin]	RSD [%]	Vol. Medium [mL]	Measur. Nr.	LDH activity [U/mL]	LDH activity [U/mL/gskin]	LDH activity [U/gskin]	Mean LDH activity [U/gskin]	SD [U/gskin]	RSD [%]	Vol. Medium [mL]	Measur. Nr.	LDH activity [U/mL]	LDH activity [U/mL/gskin]	LDH activity [U/gskin]	Mean LDH activity [U/gskin]	SD [U/gskin]	RSD [%]	Vol. Medium [mL]	Measur. Nr.	LDH activity [U/mL]	LDH activity [U/mL/gskin]	LDH activity [U/gskin]	Mean LDH activity [U/gskin]	SD [U/gskin]	RSD [%]	Vol. Medium [mL]	Measur. Nr.	LDH activity [U/mL]	LDH activity [U/mL/gskin]	LDH activity [U/gskin]	Mean LDH activity [U/gskin]	SD [U/gskin]	RSD [%]	Vol. Medium [mL]	Measur. Nr.	LDH activity [U/mL]	LDH activity [U/mL/gskin]	LDH activity [U/gskin]	Mean LDH activity [U/gskin]	SD [U/gskin]	RSD [%]
S1	0.22	0.7	1	1.02649	3.54098	2.47868	2.45923	0.0194549	0.791096	0.7	1	0.49117	1.69433	1.18603	1.14612	0.0399089	3.48208	0.7	1	0.495771	1.71021	1.19714	1.21467	0.0175228	1.4426	0.7	1	0.22715	0.783573	0.548501	0.548288	0.000213495	0.0389386	0.7	1	0.142089	0.490148	0.343103	0.351848	0	0	0.7	1	0.0402479	0.138839	0.097187	0.0944181	0	0
			2	1.01038	3.48539	2.43977					2	0.458115	1.58031	1.10621					2	0.510285	1.76027	1.23219					2	0.226973	0.782963	0.548074					2	0.14571	0.50264	0.351848					2	0.0391012	0.134883	0.0944181
S2	0.29		1	1.28878	3.91406	2.73984	2.76686	0.0270145	0.976358		1	0.394773	1.19893	0.839253	0.81749	0.0217624	2.6621		1	0.459659	0.77409	0.541863	0.541863	0	0		1	0.252757	0.767627	0.537339	0.533001	0.00433844	0.813965		1	0.146131	0.443802	0.310661	0.314906	0	0		1	0.0688762	0.209178	0.146425	0.145011	0	0
			2	1.3142	3.99125	2.79387					2	0.374299	1.13675	0.795728					2	0.47926	0.77409	0.541863					2	0.248675	0.755232	0.528662					2	0.148127	0.449866	0.314906					2	0.0682112	0.207159	0.145011
S3	0.315		1	1.14866	4.0557	2.83899	3.27638	0.437385	13.3496		1	0.393285	1.38862	0.972035	0.97679	0.00475497	0.486796		1	0.474652	1.67591	1.17314	1.18072	0.00758413	0.64233		1	0.153371	0.541527	0.379069	0.37768	0.00138865	0.367678		1	0.0655812	0.231556	0.162089	0.164321	0.0022324	1.35856		1	0.0357788	0.126329	0.08843	0.110036	0	0
			2	1.50259	5.30538	3.71376					2	0.397133	1.40221	0.981545					2	0.480789	1.69758	1.18831					2	0.152248	0.537559	0.376292					2	0.0673877	0.237934	0.166554					2	0.0445204	0.157194	0.110036
S4	0.305		1		0	0	0	0	#DIV/0!		1		0	0	0	0	#DIV/0!		1		0	0	0	0	#DIV/0!		1		0	0	0	0	#DIV/0!		1		0	0	0	0	#DIV/0!		1		0	0	0	0	#DIV/0!
			2		0	0					2		0	0					2		0	0					2		0	0					2		0	0					2		0	0
Sum LDH activity [U/g skin]		8.50247								2.9404								2.93725								1.45897								0.831076								0.349465
Mean LDH activity [U/gskin]		2.83416								0.980135								0.979084								0.486323								0.277025								0.116488
SD [U/g skin]		0.336976								0.134185								0.309473								0.0770751								0.081108								0.0211525
RSD [%]		11.8898								13.6904								31.6084								15.8485								29.2782								18.1585
		t6								t7								t8								t9								t10								t11
		8								9								10								11								14
		Vol. Medium [mL]	Measur. Nr.	LDH activity [U/mL]	LDH activity [U/mL/gskin]	LDH activity [U/gskin]	Mean LDH activity [U/gskin]	SD [U/gskin]	RSD [%]	Vol. Medium [mL]	Measur. Nr.	LDH activity [U/mL]	LDH activity [U/mL/gskin]	LDH activity [U/gskin]	Mean LDH activity [U/gskin]	SD [U/gskin]	RSD [%]	Vol. Medium [mL]	Measur. Nr.	LDH activity [U/mL]	LDH activity [U/mL/gskin]	LDH activity [U/gskin]	Mean LDH activity [U/gskin]	SD [U/gskin]	RSD [%]	Vol. Medium [mL]	Measur. Nr.	LDH activity [U/mL]	LDH activity [U/mL/gskin]	LDH activity [U/gskin]	Mean LDH activity [U/gskin]	SD [U/gskin]	RSD [%]	Vol. Medium [mL]	Measur. Nr.	LDH activity [U/mL]	LDH activity [U/mL/gskin]	LDH activity [U/gskin]	Mean LDH activity [U/gskin]	SD [U/gskin]	RSD [%]	Vol. Medium [mL]	Measur. Nr.	LDH activity [U/mL]	LDH activity [U/mL/gskin]	LDH activity [U/gskin]	Mean LDH activity [U/gskin]	SD [U/gskin]	RSD [%]
		0.7	1	0.0558642	0.192708	0.134896	0.127913	0.00698309	5.45926	0.7	1	0.0468576	0.161639	0.113147	0.114195	0.00104788	0.917622	0.7	1	0.0859159	0.296374	0.207462	0.202073	0.00538908	2.6669	0.7	1	0.0794201	0.273966	0.191777	0.173866	0.017911	10.3017	0.7	1	0.0670391	0.231257	0.16188	0.15838	0.00349973	2.2097	0.7	1	0.0736252	0.253976	0.177783	0.17764	0.000143632	0.080856
			2	0.0500804	0.172757	0.12093					2	0.0477255	0.164633	0.115243					2	0.0814523	0.280977	0.196684					2	0.0645852	0.222792	0.155954					2	0.0641404	0.221258	0.15488					2	0.0735062	0.253566	0.177496
			1	0.0603657	0.183332	0.128332	0.128332	0	0		1	0.0372067	0.112998	0.0790983	0.0857768	0.00667844	7.78584		1	0.0431011	0.130899	0.0916292	0.0957321	0.00410286	4.28578		1	0.0547258	0.166203	0.116342	0.116269	7.29102e-05	0.062708		1	0.0574554	0.174493	0.122145	0.121997	0.000148213	0.121489		1	0.08417	0.255626	0.178938	0.173984	0.00495482	2.84787
			2		0	0					2	0.0434896	0.132079	0.0924552					2	0.0469609	0.142621	0.0998349					2	0.0546572	0.165995	0.116196					2	0.057316	0.17407	0.121849					2	0.0795087	0.24147	0.169029
			1		0	0	0	0	#DIV/0!		1		0	0	0	0	#DIV/0!		1		0	0	0	0	#DIV/0!		1	0.0214812	0.0758462	0.0530923	0.0548517	0.00175933	3.20743		1	0.0196321	0.0693174	0.0485222	0.0469416	0.00158061	3.36719		1	0.0248017	0.0875704	0.0612993	0.0612993	0	0
			2		0	0					2		0	0					2		0	0					2	0.0229048	0.0808729	0.056611					2	0.018353	0.0648014	0.045361					2		0	0
			1		0	0	0	0	#DIV/0!		1		0	0	0	0	#DIV/0!		1		0	0	0	0	#DIV/0!		1		0	0	0	0	#DIV/0!		1		0	0	0	0	#DIV/0!		1		0	0	0	0	#DIV/0!
			2		0	0					2		0	0					2		0	0					2		0	0					2		0	0					2		0	0
Sum LDH activity [U/g skin]		0.256245								0.199972								0.297805								0.344987								0.327319								0.412922
Mean LDH activity [U/gskin]		0.128122								0.099986								0.148902								0.114996								0.109106								0.137641
SD [U/g skin]		0.000209769								0.0142093								0.0531704								0.0485955								0.0463988								0.0540023
RSD [%]		0.163725								14.2113								35.7082								42.2586								42.5262								39.2342
		empty field=value out of linear range													days	0	1	2	3	4	5	6	7	8	9	10	11	12	13	14
														LDH [U/gskin]	S1	2.45923	1.14612	1.21467	0.548288	0.351848	0.0944181	0.127913	0.114195	0.202073	0.173866	0	0.17764	0.183501	0.171259	0.203266
															S2	2.76686	0.81749	0.541863	0.533001	0.314906	0	0.128332	0.0857768	0.0957321	0.116269	0	0.173984	0.12397	0.112768	0.149216
															S3	3.27638	0.97679	1.18072	0.37768	0.164321	0.145011	0	0	0	0.0548517	0	0.0612993	0	0	0
															S4	0	0	0	0	0	0	0	0	0	0	0	0	0	0	0
															mean	2.83416	0.980135	0.979084	0.486323	0.277025	0.110036	0.128122	0.099986	0.148902	0.114996	0	0.137641	0.153735	0.142013	0.176241
															SD	0.336976	0.134185	0.309473	0.0770751	0.081108	0	0.000209769	0.0142093	0.0531704	0.0485955	0	0.0540023	0.0297652	0.0292458	0.0270247
															sum	8.50247	2.9404	2.93725	1.45897	0.831076	0.349465	0.256245	0.199972	0.297805	0.344987	0.327319	0.412922	0.307471	0.284027	0.352482
[truncated: 24 more columns]

## Sheet: canine S1
Time point		t0 Monday								t1								t2								t3								t4								t5
Date
Time of cultivation [days]		0								1								2								3								4								7
Skin sample	Weight of punch [g]	Vol. Medium [mL]	Measur. Nr.	LDH activity [U/mL]	LDH activity [U/mL/gskin]	LDH activity [U/gskin]	Mean LDH activity [U/gskin]	SD [U/gskin]	RSD [%]	Vol. Medium [mL]	Measur. Nr.	LDH activity [U/mL]	LDH activity [U/mL/gskin]	LDH activity [U/gskin]	Mean LDH activity [U/gskin]	SD [U/gskin]	RSD [%]	Vol. Medium [mL]	Measur. Nr.	LDH activity [U/mL]	LDH activity [U/mL/gskin]	LDH activity [U/gskin]	Mean LDH activity [U/gskin]	SD [U/gskin]	RSD [%]	Vol. Medium [mL]	Measur. Nr.	LDH activity [U/mL]	LDH activity [U/mL/gskin]	LDH activity [U/gskin]	Mean LDH activity [U/gskin]	SD [U/gskin]	RSD [%]	Vol. Medium [mL]	Measur. Nr.	LDH activity [U/mL]	LDH activity [U/mL/gskin]	LDH activity [U/gskin]	Mean LDH activity [U/gskin]	SD [U/gskin]	RSD [%]	Vol. Medium [mL]	Measur. Nr.	LDH activity [U/mL]	LDH activity [U/mL/gskin]	LDH activity [U/gskin]	Mean LDH activity [U/gskin]	SD [U/gskin]	RSD [%]
S1	0.311	0.7	1	3.09979	10.693	7.4851	7.4322	0	0	0.7	1	0.731162	2.5222	1.76554	1.78451	0	0	0.7	1	0.627697	2.16529	1.51571	1.54827	0	0	0.7	1		0	0	0	0	#DIV/0!	0.7	1	0.0781393	0.269548	0.188684	0.185895	0	0	0.7	1		0	0	0.0609772	0	0
			2	3.07789	10.6174	7.4322					2	0.746871	2.57639	1.80348					2	0.65467	2.25834	1.58084					2		0	0					2	0.0769844	0.265564	0.185895					2	0.0252524	0.0871104	0.0609772
S2	0.293		1	0.37177	1.12907	0.790351	0.790351	0	0		1	0.51985	1.5788	1.10516	1.11725	0	0		1	0.56946	0.77409	0.541863	0.541863	0	0		1	0.241967	0.734859	0.514401	0.524448	0	0		1	0.0268394	0.0815118	0.0570582	0.0574911	0	0		1	0.0581119	0.176487	0.123541	0.149348	0.0258071	17.2798
			2	0.987863	3.00016	2.10011					2	0.53123	1.61336	1.12935					2	0.557576	0.77409	0.541863					2	0.251419	0.763564	0.534495					2	0.027043	0.0821301	0.0574911					2	0.0823905	0.250222	0.175155
S3	0.298		1	0.775618	2.73857	1.917	2.36287	0.44587	18.8699		1	0.452259	1.59685	1.11779	1.10376	0	0		1	0.541364	1.91146	1.33802	1.31679	0	0		1	0.228111	0.805419	0.563793	0.574189	0	0		1	0.0793627	0.280216	0.196151	0.223893	0.0277415	12.3905		1		0	0	0.0476481	0	0
			2	1.13642	4.01248	2.80874					2	0.4409	1.55674	1.08972					2	0.524184	1.8508	1.29556					2	0.236523	0.835121	0.584585					2	0.101811	0.359477	0.251634					2	0.0192784	0.0680688	0.0476481
S4	0.287		1	0.0186991	0.0559585	0.039171	0.0460568	0.00688579	14.9506		1		0	0	0	0	#DIV/0!		1		0	0	0	0	#DIV/0!		1		0	0	0	0	#DIV/0!		1		0	0	0	0	#DIV/0!		1		0	0	0	0	#DIV/0!
			2	0.0252733	0.0756322	0.0529426					2		0	0					2		0	0					2		0	0					2		0	0					2		0	0
Sum LDH activity [U/g skin]		10.5854								4.00552								3.40693								1.09864								0.467279								0.257973
Mean LDH activity [U/gskin]		3.52847								1.33517								1.13564								0.549319								0.15576								0.0859912
SD [U/g skin]		2.83402								0.317776								0.430369								0.0248705								0.0711968								0.0451294
RSD [%]		80.3186								23.8004								37.8965								4.52752								45.7094								52.4814
		t6								t7								t8								t9								t10								t11
		8								9								10								11								14
		Vol. Medium [mL]	Measur. Nr.	LDH activity [U/mL]	LDH activity [U/mL/gskin]	LDH activity [U/gskin]	Mean LDH activity [U/gskin]	SD [U/gskin]	RSD [%]	Vol. Medium [mL]	Measur. Nr.	LDH activity [U/mL]	LDH activity [U/mL/gskin]	LDH activity [U/gskin]	Mean LDH activity [U/gskin]	SD [U/gskin]	RSD [%]	Vol. Medium [mL]	Measur. Nr.	LDH activity [U/mL]	LDH activity [U/mL/gskin]	LDH activity [U/gskin]	Mean LDH activity [U/gskin]	SD [U/gskin]	RSD [%]	Vol. Medium [mL]	Measur. Nr.	LDH activity [U/mL]	LDH activity [U/mL/gskin]	LDH activity [U/gskin]	Mean LDH activity [U/gskin]	SD [U/gskin]	RSD [%]	Vol. Medium [mL]	Measur. Nr.	LDH activity [U/mL]	LDH activity [U/mL/gskin]	LDH activity [U/gskin]	Mean LDH activity [U/gskin]	SD [U/gskin]	RSD [%]	Vol. Medium [mL]	Measur. Nr.	LDH activity [U/mL]	LDH activity [U/mL/gskin]	LDH activity [U/gskin]	Mean LDH activity [U/gskin]	SD [U/gskin]	RSD [%]
		0.7	1		0	0	0.04455	0	0	0.7	1		0	0	0	0	#DIV/0!	0.7	1		0	0	0	0	#DIV/0!	0.7	1		0	0	0	0	#DIV/0!	0.7	1		0	0	0	0	#DIV/0!	0.7	1		0	0	0	0	#DIV/0!
			2	0.0184494	0.0636428	0.04455					2		0	0					2		0	0					2		0	0					2		0	0					2		0	0
			1	0.0490882	0.149082	0.104357	0.0769269	0.0274305	35.6579		1		0	0	0	0	#DIV/0!		1	0.0177437	0.0538881	0.0377217	0.0449765	0.00725489	16.1304		1		0	0	0	0	#DIV/0!		1		0	0	0	0	#DIV/0!		1		0	0	0	0	#DIV/0!
			2	0.0232824	0.0707092	0.0494964					2		0	0					2	0.0245689	0.0746163	0.0522314					2		0	0					2		0	0					2		0	0
			1		0	0	0.102043	0	0		1		0	0	0	0	#DIV/0!		1		0	0	0	0	#DIV/0!		1		0	0	0	0	#DIV/0!		1		0	0	0	0	#DIV/0!		1		0	0	0	0	#DIV/0!
			2	0.0412867	0.145776	0.102043					2		0	0					2		0	0					2		0	0					2		0	0					2		0	0
			1		0	0	0	0	#DIV/0!		1		0	0	0	0	#DIV/0!		1		0	0	0	0	#DIV/0!		1		0	0	0	0	#DIV/0!		1		0	0	0	0	#DIV/0!		1		0	0	0	0	#DIV/0!
			2		0	0					2		0	0					2		0	0					2		0	0					2		0	0					2		0	0
Sum LDH activity [U/g skin]		0.22352								0								0.0449765								0								0								0
Mean LDH activity [U/gskin]		0.0745067								0								0.0449765								0								0								0
SD [U/g skin]		0.0235338								0								0								0								0								0
RSD [%]		31.5862								#DIV/0!								0								#DIV/0!								#DIV/0!								#DIV/0!
		empty field=value out of linear range													days	0	1	2	3	4	5	6	7	8	9	10	11	12	13	14
														LDH [U/gskin]	S1	7.4322	1.78451	1.54827	0	0.185895	0.0609772	0.04455	0	0	0	0.0609772	0	0	0	0
															S2	0.790351	1.11725	0.541863	0.524448	0.0574911	0	0.0769269	0	0.0449765	0	0.0609772	0	0	0	0
															S3	2.36287	1.10376	1.31679	0.574189	0.223893	0.149348	0.102043	0	0	0	0.0609772	0	0	0	0
															S4	0.0460568	0	0	0	0	0	0	0	0	0	0.0609772	0	0	0	0
															mean	3.52847	1.33517	1.13564	0.549319	0.15576	0.0476481	0.0745067	0	0.0449765	0	0.0609772	0	0	0	0
															SD	2.83402	0.317776	0.430369	0.0248705	0.0711968	0	0.0235338	0	0	0	0.0609772	0	0	0	0
															sum	10.5854	4.00552	3.40693	1.09864	0.467279	0.257973	0.22352	0	0.0449765	0	0	0	0	0	0
[truncated: 24 more columns]

## Sheet: canine S2
Time point		t0 Monday								t1								t2								t3								t4								t5
Date
Time of cultivation [days]		0								1								2								3								4								7
Skin sample	Weight of punch [g]	Vol. Medium [mL]	Measur. Nr.	LDH activity [U/mL]	LDH activity [U/mL/gskin]	LDH activity [U/gskin]	Mean LDH activity [U/gskin]	SD [U/gskin]	RSD [%]	Vol. Medium [mL]	Measur. Nr.	LDH activity [U/mL]	LDH activity [U/mL/gskin]	LDH activity [U/gskin]	Mean LDH activity [U/gskin]	SD [U/gskin]	RSD [%]	Vol. Medium [mL]	Measur. Nr.	LDH activity [U/mL]	LDH activity [U/mL/gskin]	LDH activity [U/gskin]	Mean LDH activity [U/gskin]	SD [U/gskin]	RSD [%]	Vol. Medium [mL]	Measur. Nr.	LDH activity [U/mL]	LDH activity [U/mL/gskin]	LDH activity [U/gskin]	Mean LDH activity [U/gskin]	SD [U/gskin]	RSD [%]	Vol. Medium [mL]	Measur. Nr.	LDH activity [U/mL]	LDH activity [U/mL/gskin]	LDH activity [U/gskin]	Mean LDH activity [U/gskin]	SD [U/gskin]	RSD [%]	Vol. Medium [mL]	Measur. Nr.	LDH activity [U/mL]	LDH activity [U/mL/gskin]	LDH activity [U/gskin]	Mean LDH activity [U/gskin]	SD [U/gskin]	RSD [%]
S1	0.281	0.7	1	0.763498	2.63375	1.84362	2.15112	0.307497	14.2947	0.7	1	0.49117	1.69433	1.18603	1.14612	0.0399089	3.48208	0.7	1	0.499453	1.7229	1.20603	1.21864	0.0126072	1.03453	0.7	1	0.163073	0.562536	0.393775	0.380306	0.0134691	3.54165	0.7	1	0.043148	0.148843	0.10419	0.108793	0	0	0.7	1	0.0537009	0.185246	0.129672	0.127673	0	0
			2	1.01818	3.51231	2.45862					2	0.458115	1.58031	1.10621					2	0.509895	1.75893	1.23125					2	0.151918	0.524053	0.366837					2	0.0450545	0.155419	0.108793					2	0.0528728	0.182389	0.127673
S2	0.275		1	2.24371	6.8142	4.76994	4.76994	0	0		1	0.53123	1.61336	1.12935	1.04541	0.0839429	8.02968		1	0.606701	1.84256	1.28979	1.30233	0.0125366	0.962626		1	0.219627	0.667012	0.466908	0.471906	0.0049975	1.059		1	0.0510272	0.154971	0.108479	0.124357	0	0		1		0	0	0	0	#DIV/0!
			2	3.30328	10.0321	7.0225					2	0.452259	1.37352	0.961464					2	0.618495	1.87838	1.31487					2	0.224329	0.681291	0.476903					2	0.0584957	0.177653	0.124357					2		0	0
S3	0.309		1	1.09245	3.85726	2.70008	2.74896	0.0488752	1.77795		1	0.393285	1.38862	0.972035	0.97679	0.00475497	0.486796		1	0.43045	1.51984	1.06389	1.06449	0.000597247	0.0561066		1		0	0	0	0	#DIV/0!		1	0.0755321	0.26669	0.186683	0.187097	0.000414069	0.221312		1		0	0	0	0	#DIV/0!
			2	1.132	3.99691	2.79783					2	0.397133	1.40221	0.981545					2	0.430933	1.52155	1.06508					2		0	0					2	0.0758671	0.267873	0.187511					2		0	0
S4	0.301		1		0	0	0	0	#DIV/0!		1		0	0	0	0	#DIV/0!		1		0	0	0	0	#DIV/0!		1		0	0	0	0	#DIV/0!		1		0	0	0	0	#DIV/0!		1		0	0	0	0	#DIV/0!
			2		0	0					2		0	0					2		0	0					2		0	0					2		0	0					2		0	0
Sum LDH activity [U/g skin]		9.67002								3.16832								3.58546								0.852212								0.420248								0.127673
Mean LDH activity [U/gskin]		3.22334								1.05611								1.19515								0.426106								0.140083								0.127673
SD [U/g skin]		1.12052								0.069543								0.0985093								0.0458								0.0338462								0
RSD [%]		34.7626								6.58485								8.24241								10.7485								24.1616								0
		t6								t7								t8								t9								t10								t11
		8								9								10								11								14
		Vol. Medium [mL]	Measur. Nr.	LDH activity [U/mL]	LDH activity [U/mL/gskin]	LDH activity [U/gskin]	Mean LDH activity [U/gskin]	SD [U/gskin]	RSD [%]	Vol. Medium [mL]	Measur. Nr.	LDH activity [U/mL]	LDH activity [U/mL/gskin]	LDH activity [U/gskin]	Mean LDH activity [U/gskin]	SD [U/gskin]	RSD [%]	Vol. Medium [mL]	Measur. Nr.	LDH activity [U/mL]	LDH activity [U/mL/gskin]	LDH activity [U/gskin]	Mean LDH activity [U/gskin]	SD [U/gskin]	RSD [%]	Vol. Medium [mL]	Measur. Nr.	LDH activity [U/mL]	LDH activity [U/mL/gskin]	LDH activity [U/gskin]	Mean LDH activity [U/gskin]	SD [U/gskin]	RSD [%]	Vol. Medium [mL]	Measur. Nr.	LDH activity [U/mL]	LDH activity [U/mL/gskin]	LDH activity [U/gskin]	Mean LDH activity [U/gskin]	SD [U/gskin]	RSD [%]	Vol. Medium [mL]	Measur. Nr.	LDH activity [U/mL]	LDH activity [U/mL/gskin]	LDH activity [U/gskin]	Mean LDH activity [U/gskin]	SD [U/gskin]	RSD [%]
		0.7	1	0.0407033	0.140409	0.0982866	0.100572	0.00228551	2.27251	0.7	1	0.0207246	0.0714913	0.0500439	0.059662	0.00961807	16.1209	0.7	1	0.0340885	0.117591	0.0823138	0.0826347	0.000320918	0.388357	0.7	1	0.0221937	0.0765589	0.0535913	0.0517519	0.00183935	3.55417	0.7	1		0	0	0	0	#DIV/0!	0.7	1	0.0219053	0.0755642	0.0528949	0.0533942	0.000499281	0.935085
			2	0.0425963	0.146939	0.102858					2	0.0286909	0.0989715	0.0692801					2	0.0343543	0.118508	0.0829556					2	0.0206702	0.0713037	0.0499126					2		0	0					2	0.0223188	0.0769907	0.0538935
			1		0	0	0	0	#DIV/0!		1		0	0	0	0	#DIV/0!		1		0	0	0	0	#DIV/0!		1		0	0	0	0	#DIV/0!		1		0	0	0	0	#DIV/0!		1		0	0	0	0	#DIV/0!
			2		0	0					2		0	0					2		0	0					2		0	0					2		0	0					2		0	0
			1		0	0	0	0	#DIV/0!		1		0	0	0	0	#DIV/0!		1		0	0	0	0	#DIV/0!		1	0.0193173	0.0682059	0.0477441	0.0492269	0.00148281	3.01219		1		0	0	0	0	#DIV/0!		1	0.0180115	0.0635955	0.0445168	0.0442234	0.000293408	0.663467
			2		0	0					2		0	0					2		0	0					2	0.0205172	0.0724425	0.0507097					2		0	0					2	0.0177741	0.0627572	0.04393
			1		0	0	0	0	#DIV/0!		1		0	0	0	0	#DIV/0!		1		0	0	0	0	#DIV/0!		1	0.0395474	0.118349	0.0828442	0.0734054	0.00943882	12.8585		1		0	0	0	0	#DIV/0!		1		0	0	0	0	#DIV/0!
			2		0	0					2		0	0					2		0	0					2	0.0305358	0.0913808	0.0639665					2		0	0					2		0	0
Sum LDH activity [U/g skin]		0.100572								0.059662								0.0826347								0.100979								0								0.0976176
Mean LDH activity [U/gskin]		0.100572								0.059662								0.0826347								0.0613161								0								0.0325392
SD [U/g skin]		0								0								0								0.0268674								0								0.0233113
RSD [%]		0								0								0								43.8179								#DIV/0!								71.6407
		empty field=value out of linear range													days	0	1	2	3	4	5	6	7	8	9	10	11	12	13	14
														LDH [U/gskin]	S1	7.4322	1.78451	1.54827	0	0.185895	0.0609772	0.04455	0	0	0	0.0609772	0	0	0	0
															S2	0.790351	1.11725	0.541863	0.524448	0.0574911	0	0.0769269	0	0.0449765	0	0.0609772	0	0	0	0
															S3	2.36287	1.10376	1.31679	0.574189	0.223893	0.149348	0.102043	0	0	0	0.0609772	0	0	0	0
															S4	0.0460568	0	0	0	0	0	0	0	0	0	0.0609772	0	0	0	0
															mean	3.52847	1.33517	1.13564	0.549319	0.15576	0.0476481	0.0745067	0	0.0449765	0	0.0609772	0	0	0	0
															SD	2.83402	0.317776	0.430369	0.0248705	0.0711968	0	0.0235338	0	0	0	0.0609772	0	0	0	0
															sum	10.5854	4.00552	3.40693	1.09864	0.467279	0.257973	0.22352	0	0.0449765	0	0	0	0	0	0
[truncated: 24 more columns]

## Sheet: Summary
	human viabilität %	70.9732	69.5241	65.3108	65.1309	61.9753	56.6548	54.0513	53.2605	53.0074	52.8499	52.6698	52.4028	52.1617	52.0994	52.0491
		81.0562	75.1293	65.5018	56.0072	52.2218	52.081	51.9764	51.9764	51.9044	51.9044	51.9044	51.9044	51.9044	51.9044	51.9044
		69.2515	68.1847	64.4966	61.2415	60.1229	59.0075	58.0911	57.3029	57.0092	56.7172	56.4369	56.1391	55.7731	55.4069	55.1205
	schwein viabilität %	66.447	55.8748	55.1638	54.135	53.3873	52.6025	52.2308	51.966	51.79	51.5899	51.3806	51.2213	51.0557	50.8538	50.6323
		65.9997	55.0818	52.5505	50.4783	49.2681	48.8754	48.7121	48.5925	48.5515	48.4693	48.396	48.277	47.9843	47.8572	47.7192
		69.9412	61.4801	59.296	57.8959	56.6281	56.1559	55.9793	55.8331	55.745	55.6344	55.5194	55.3684	55.1732	55.0487	54.8531
	hund viabilität %	85.1561	80.0226	74.8946	72.3475	70.8965	70.2864	69.8391	69.49	68.97	68.3677	67.7963	67.0754	66.5386	66.0427	65.4274
		81.5195	74.5266	68.5786	66.6606	65.8448	65.3944	65.0042	65.0042	64.9256	64.9256	64.9256	64.9256	64.9256	64.9256	64.9256
		83.1177	77.5863	71.3267	69.8388	69.1051	68.8823	68.7067	68.6025	68.4582	68.282	68.282	68.1115	68.1115	67.9213	67.8316
Human		0	1	2	3	4	5	6	7	8	9	10	11	12	13	14
	sum noncumulated	47.3381	2.36329	6.87122	0.293314	5.14631	8.6768	4.2459	1.28975	0.412722	0.256796	0.293837	0.43539	0.393217	0.30486	0.246112
	release in %	9.67561	0.483042	1.40443	0.0599516	1.05187	1.74276	0.867834	0.263617	0.0843577	0.0524874	0.0600585	0.088991	0.080371	0.0623114	0.0503038
Nativ	mean	15.7794	0.787764	2.29041	0.0977714	1.71544	2.84216	1.4153	0.429918	0.137574	0.0855986	0.0979457	0.14513	0.131072	0.10162	0.0820375
	kumulativ sum	47.3381	49.7014	56.5726	56.8659	62.0122	70.689	74.9349	76.2247	76.6374	76.8942	77.1881	77.6234	78.0167	78.1183	78.2003
	163.084	29.0268	30.4759	34.6892	34.8691	38.0247	43.3452	45.9487	46.7395	46.9926	47.1501	47.3302	47.5972	47.8383	47.9006	47.9509
	SD	3.48075	0.414855	0.579754	0.0258568	0.911997	0	0.220242	0.164809	0.0356737	0.0228237	0	0.00594057	0.00781952	0.0162673	0.013805
	sum noncumulated	30.8943	9.66581	15.701	15.4841	6.17328	0.229777	0.170563	0	0.117403	0	0	0	0	0	0
	release in %	6.09737	1.98407	3.17714	3.13263	1.25543	0.0632721	0.0344835	0	0.0726769	0	0	0	0	0	0.0287665
suppl.1	mean	9.94384	3.2357	5.1814	5.10881	2.04741	0.103187	0.056237	0	0.118524	0	0	0	0	0	0.0469136
	kumulativ sum	30.8943	40.5601	56.2611	71.7452	77.9185	78.1483	78.3189	78.3189	78.4363	78.4363	78.4363	78.4363	78.4363	78.4363	78.4363
	163.084	18.9438	24.8707	34.4982	43.9928	47.7782	47.919	48.0236	48.0236	48.0956	48.0956	48.0956	48.0956	48.0956	48.0956	48.0956
	SD	9.96624	3.51709	0.581637	0.984706	0.769871	0	0.00281989	0	0	0	0	0	0	0	0
	sum	50.1458	1.73983	6.01473	5.30856	1.82419	1.81912	1.49436	1.28543	0.478976	0.476196	0.457159	0.485773	0.596791	0.597298	0.46694
	release in %	10.2495	0.35561	1.22937	1.08504	0.372852	0.468258	0.305438	0.262734	0.0978997	0.0973314	0	0.0992889	0.12198	0.122084	0.0954395
suppl.2	mean	16.7153	0.579942	2.00491	1.76952	0.608062	0.763654	0.49812	0.428478	0.159659	0.158732	0	0.161924	0.19893	0.199099	0.155647
	kumulativ sum	50.1458	51.8857	57.9004	63.209	65.0332	66.8523	68.3466	69.6321	70.111	70.5872	71.0444	71.5302	72.127	72.7243	73.1912
	163.084	30.7485	31.8153	35.5034	38.7585	39.8771	40.9925	41.9089	42.6971	42.9908	43.2828	43.5631	43.8609	44.2269	44.5931	44.8795
	SD	7.2078	0.0890281	0.221382	0.130562	0.0366343	0	0.0842549	0.00532016	0.0216615	0.0219207	0	0.0306881	0.0266054	0.0438652	0.0203334
	mean human	14.1462	1.53447	3.15891	2.32537	1.45697	1.23634	0.656552	0.286132	0.138586	0.0814435	0.0326486	0.102351	0.110001	0.10024	0.0948659
	mean hund kumul.	42.7927	47.3824	56.9114	63.94	68.3213	71.8965	73.8668	74.7252	75.0616	75.3059	75.5562	75.8633	76.1933	76.4263	76.6093
	mean hund %	8.67416	0.940907	1.93698	1.42587	0.893386	0.758097	0.402585	0.175451	0.0849781	0.0499396	0.0200195	0.06276	0.0674504	0.0614651	0.0581699
	mean hund % kumul.	26.2397	29.054	34.897	39.2068	41.8933	44.0856	45.2937	45.8201	46.0263	46.1761	46.3296	46.5179	46.7203	46.8631	46.9753
	mean % viabilität	73.7603	70.946	65.103	60.7932	58.1067	55.9144	54.7063	54.1799	53.9737	53.8239	53.6704	53.4821	53.2797	53.1369	53.0247
	SD													0.0344249
	sum	41.8848	13.1975	0.887532	1.28429	0.933454	0.979684	0.463978	0.330553	0.219644	0.249798	0.261291	0.198921	0.206693	0.252005	0.27656
Schwein	release in %	11.2151	3.52407	0.533236	0.771609	0.560826	0.370294	0.278761	0.198599	0.131964	0.15008	0.156986	0.119513	0.124183	0.151406	0.166159
Nativ	mean	14	4.39917	0.665649	0.963215	0.70009	0.462245	0.347983	0.247915	0.164733	0.187348	0.195968	0.149191	0.15502	0.189004	0.20742
	kumulativ sum	41.8848	55.0823	55.9699	57.2542	58.1876	59.1673	59.6313	59.9618	60.1815	60.4313	60.6926	60.8915	61.0982	61.3502	61.6267
	124.832	33.553	44.1252	44.8362	45.865	46.6127	47.3975	47.7692	48.034	48.21	48.4101	48.6194	48.7787	48.9443	49.1462	49.3677
	SD	0.9	1.23743	0.268829	0.172085	0.136156	0	0.0603502	0.0549001	0.0634921	0.0548786	0.0160238	0.026636	0.0163966	0.00236111	0.0249683
	sum	42.4433	13.6289	3.15988	2.5868	1.51076	0.490134	0.203905	0.149334	0.0511157	0.102611	0.091573	0.148448	0.365424	0.158713	0.172265
	release in %	11.2952	3.63928	0.843769	0.690741	0.403411	0.11382	0.0544479	0.0598138	0.0409476	0.0821992	0	0.0594592	0.0975776	0.0635705	0.0689988
suppl.1	mean	14.1	4.54298	1.05329	0.862266	0.503586	0.142084	0.0679684	0.0746668	0.0511157	0.102611	0	0.0742242	0.121808	0.0793563	0.0861326
	kumulativ sum	42.4433	56.0722	59.2321	61.8189	63.3297	63.8198	64.0237	64.173	64.2242	64.3268	64.4183	64.5668	64.9322	65.0909	65.2632
	124.832	34.0003	44.9182	47.4495	49.5217	50.7319	51.1246	51.2879	51.4075	51.4485	51.5307	51.604	51.723	52.0157	52.1428	52.2808
	SD	2.4	2.17431	0.201837	0.2933	0.09338	0.142084	0.0144797	0.0112812	0	0	0	0.0292153	0.0394379	0.0363554	0.0294164
	sum	37.523	10.5621	2.72644	1.74788	1.58254	0.589508	0.220383	0.182519	0.109948	0.138166	0.143524	0.188439	0.2437	0.155397	0.244264
	release in %	10.0135	2.82035	0.72803	0.466729	0.422578	0.166092	0.0588478	0.0487372	0.029359	0.0368939	0	0.0503179	0.0650741	0.0414949	0.0652248
suppl.2	mean	12.5	3.52069	0.908814	0.582627	0.527513	0.207336	0.0734609	0.0608396	0.0366494	0.0460554	0	0.0628129	0.0812333	0.051799	0.0814215
	kumulativ sum	37.523	48.0851	50.8116	52.5594	54.142	54.7315	54.9519	55.1344	55.2443	55.3825	55.526	55.7145	55.9582	56.1136	56.3578
	124.832	30.0588	38.5199	40.704	42.1041	43.3719	43.8441	44.0207	44.1669	44.255	44.3656	44.4806	44.6316	44.8268	44.9513	45.1469
	SD	3	2.29162	0.319065	0.251574	0.100312	0	0.0266085	0.0180221	0.0261353	0.032618	0	0.0216353	0.0327171	0.0110297	0.0346235
	mean schwein	13.5333	4.15428	0.875919	0.802703	0.577063	0.270555	0.163138	0.127807	0.0841659	0.112005	0.0653228	0.0954093	0.119354	0.10672	0.124991
	mean hund kumul.	40.6171	53.0799	55.3379	57.2108	58.5531	59.2395	59.5356	59.7564	59.8833	60.0469	60.2123	60.3909	60.6629	60.8516	61.0826
	mean hund %	10.8412	3.3279	0.701678	0.643026	0.462272	0.216735	0.130686	0.102383	0.0674234	0.0897245	0.0523285	0.0764302	0.0956115	0.0854906	0.100128
	mean hund % kumul.	32.5374	42.5211	44.3299	45.8303	46.9055	47.4554	47.6926	47.8695	47.9711	48.1021	48.2347	48.3778	48.5956	48.7468	48.9318
	mean % viabilität	67.4626	57.4789	55.6701	54.1697	53.0945	52.5446	52.3074	52.1305	52.0289	51.8979	51.7653	51.6222	51.4044	51.2532	51.0682
	SD													0.0885516
	sum	8.50247	2.9404	2.93725	1.45897	0.831076	0.349465	0.256245	0.199972	0.297805	0.344987	0.327319	0.412922	0.307471	0.284027	0.352482
Hund	release in %	4.94798	1.71116	1.70932	0.849042	0.483642	0.192105	0.223681	0.17456	0.25996	0.200764	0	0.240299	0.268398	0.247933	0.307688
Nativ	mean	2.83416	0.980135	0.979084	0.486323	0.277025	0.110036	0.128122	0.099986	0.148902	0.114996	0	0.137641	0.153735	0.142013	0.176241
	kumulativ sum	8.50247	11.4429	14.3801	15.8391	16.6702	17.0196	17.2759	17.4758	17.7737	18.1186	18.446	18.8589	19.1664	19.4504	19.8029
	57.279	14.8439	19.9774	25.1054	27.6525	29.1035	29.7136	30.1609	30.51	31.03	31.6323	32.2037	32.9246	33.4614	33.9573	34.5726
	SD	0.336976	0.134185	0.309473	0.0770751	0.081108	0	0.000209769	0.0142093	0.0531704	0.0485955	0	0.0540023	0.0297652	0.0292458	0.0270247
	sum	10.5854	4.00552	3.40693	1.09864	0.467279	0.257973	0.22352	0	0.0449765	0	0	0	0	0	0
	release in %	6.16015	2.331	1.98265	0.959023	0.271931	0.083186	0.130077	0	0.0785219	0	0.106457	0	0	0	0
suppl.1	mean	3.52847	1.33517	1.13564	0.549319	0.15576	0.0476481	0.0745067	0	0.0449765	0	0.0609772	0	0	0	0
	kumulativ sum	10.5854	14.5909	17.9979	19.0965	19.5638	19.8218	20.0453	20.0453	20.0902	20.0902	20.0902	20.0902	20.0902	20.0902	20.0902
	57.279	18.4805	25.4734	31.4214	33.3394	34.1552	34.6056	34.9958	34.9958	35.0744	35.0744	35.0744	35.0744	35.0744	35.0744	35.0744
	SD	2.83402	0.317776	0.430369	0.0248705	0.0711968	0	0.0235338	0	0	0	0.0609772	0	0	0	0
	sum	9.67002	3.16832	3.58546	0.852212	0.420248	0.127673	0.100572	0.059662	0.0826347	0.100979	0	0.0976176	0	0.108968	0.0513656
	release in %	5.62744	1.84379	2.08655	0.743913	0.244562	0	0.175583	0.10416	0.144267	0.107048	0	0.0568083	0	0.0634137	0.0896761
suppl.2	mean	3.22334	1.05611	1.19515	0.426106	0.140083	0	0.100572	0.059662	0.0826347	0.0613161	0	0.0325392	0	0.0363227	0.0513656
	kumulativ sum	9.67002	12.8383	16.4238	17.276	17.6963	17.8239	17.9245	17.9842	18.0668	18.1678	18.1678	18.2654	18.2654	18.3744	18.4257
	57.279	16.8823	22.4137	28.6733	30.1612	30.8949	31.1177	31.2933	31.3975	31.5418	31.718	31.718	31.8885	31.8885	32.0787	32.1684
	SD	1.12052	0.069543	0.0985093	0.0458	0.0338462	0	0	0	0	0.0268674	0	0.0233113	0	0.0256876	0
	mean hund	3.19532	1.1238	1.10329	0.487249	0.190956	0.0525613	0.101067	0.053216	0.0921712	0.0587706	0.0203257	0.0567267	0.0512451	0.0594454	0.0758688
	mean hund kumul.	9.58597	12.9574	16.2673	17.4039	17.9767	18.2218	18.4152	18.5018	18.6436	18.7922	18.9013	19.0715	19.174	19.305	19.4396
	mean hund %	5.57852	1.96198	1.92617	0.850659	0.333378	0.0917636	0.176447	0.0929067	0.160916	0.102604	0.0354855	0.0990357	0.0894658	0.103782	0.132455
	mean hund % kumul.	16.7356	22.6215	28.4	30.3844	31.3845	31.8123	32.15	32.3011	32.5487	32.8082	32.9987	33.2958	33.4747	33.7034	33.9385
	mean % viabilität	83.2644	77.3785	71.6	69.6156	68.6155	68.1877	67.85	67.6989	67.4513	67.1918	67.0013	66.7042	66.5253	66.2966	66.0615
	SD	Positivkontrolle 100%:												0.3
		human: 163,1 U/g skin
		Schwein: 124,8 U/g skin
		Hund: 57,3 U/g skin
